# Supplementary material for: Global In-Silico Scenario of tRNA Genes and Their Organization in Virus Genomes
Source: MDPI journal article supplement (doi:10.3390/v11020180), 2019-02-21
Supplement: s1 [file s1]

**Table S5** CDS associated with tRNA gene clusters shared among the phages

| Genome/group (1)         | Host phylum (1)       | Genome/group (2)                     | Host phylum (2)                  | # shared genes | Gene product                                   |
|--------------------------|-----------------------|--------------------------------------|----------------------------------|----------------|------------------------------------------------|
| Roseobacter phage DSS3P8 | <i>Proteobacteria</i> | Stenotrophomonas phage vB SmaS-DLP 6 | <i>Proteobacteria</i>            | 1              | Ribonuclease H-like                            |
|                          |                       | Klebsiella phage IME260              | <i>Proteobacteria</i>            | 3              | hypothetical (3)                               |
| Pectobacterium phage My1 | <i>Proteobacteria</i> | G8                                   | <i>Proteobacteria</i>            | 4              | hypothetical (3)                               |
|                          |                       | G14                                  | <i>Proteobacteria</i>            | 1              | Cell wall hydrolase                            |
|                          |                       | G15                                  | <i>Proteobacteria</i>            | 1              | hypothetical                                   |
|                          |                       | Klebsiella phage IME260              | <i>Proteobacteria</i>            | 3              | DUF4326 superfamily                            |
| G8                       | <i>Proteobacteria</i> | G5                                   | <i>Proteobacteria</i>            | 1              | hypothetical (3)                               |
|                          |                       | G17                                  | <i>Proteobacteria</i>            | 1              | hypothetical                                   |
| Streptomyces phage Brock | <i>Actinobacteria</i> | G4                                   | <i>Actinobacteria</i>            | 1              | Permuted papain-like amidase enzyme (NLPC_P60) |
| Cronobacter phage S13    | <i>Proteobacteria</i> | G1                                   | <i>Proteobacteria/Firmicutes</i> | 1              | hypothetical                                   |
| G5                       | <i>Proteobacteria</i> | G7                                   | <i>Proteobacteria</i>            | 1              | hypothetical                                   |
| G6                       | <i>Actinobacteria</i> | G9                                   | <i>Actinobacteria</i>            | 1              | HNH endonuclease                               |
| G13                      | <i>Proteobacteria</i> | G5                                   | <i>Proteobacteria</i>            | 1              | hypothetical                                   |
|                          |                       | G21                                  | <i>Proteobacteria</i>            | 1              | hypothetical                                   |
|                          |                       | G21                                  | <i>Proteobacteria</i>            | 1              | hypothetical                                   |
|                          |                       | G23                                  | <i>Proteobacteria</i>            | 4              | hypothetical (4)                               |
| G14                      | <i>Proteobacteria</i> | Acinetobacter phage Acj9             | <i>Proteobacteria</i>            | 1              | hypothetical                                   |
|                          |                       | Acinetobacter phage 133              | <i>Proteobacteria</i>            | 1              | hypothetical                                   |
|                          |                       | G1                                   | <i>Proteobacteria/Firmicutes</i> | 1              | hypothetical                                   |
| G16                      | <i>Proteobacteria</i> | Pseudomonas phage VCM                | <i>Proteobacteria</i>            | 1              | hypothetical                                   |
|                          |                       | Pseudomonas phage phiPsa374          | <i>Proteobacteria</i>            | 1              | hypothetical                                   |
| G20                      | <i>Firmicutes</i>     | Enterococcus phage EFDG1             | <i>Firmicutes</i>                | 1              | PHA02414 superfamily                           |
| G21                      | <i>Proteobacteria</i> | G7                                   | <i>Proteobacteria</i>            | 1              | hypothetical                                   |
|                          |                       | G21                                  | <i>Proteobacteria</i>            | 1              | hypothetical                                   |
| G23                      | <i>Proteobacteria</i> | Acinetobacter phage Acj9             | <i>Proteobacteria</i>            | 1              | hypothetical                                   |
|                          |                       | Acinetobacter phage 133              | <i>Proteobacteria</i>            | 1              | hypothetical                                   |
