# Supplementary material for: Global In-Silico Scenario of tRNA Genes and Their Organization in Virus Genomes
Source: MDPI journal article supplement (doi:10.3390/v11020180), 2019-02-21
Supplement: s1 [file s1]

# Sheet1

**Table S6** List of tRNA gene sequences presenting  $\geq 90\%$  identity

| #ID           | tRNA length | Sequence name                                            |
|---------------|-------------|----------------------------------------------------------|
| Cluster 24672 |             |                                                          |
| 0             | 87nt        | tRNA-Bacillus_phage_BCP78-Tyr(gta)                       |
| 1             | 87nt        | tRNA-Bacillus_phage_BCU4-Tyr(gta)                        |
| 2             | 107nt       | W141789742 JOTM01000011 Firmicutes Bacillus              |
| 3             | 107nt       | W1610924658 LTAQ01000004 Firmicutes Bacillus             |
| Cluster 26162 |             |                                                          |
| 0             | 87nt        | tRNA-Serratia_phage_X20-Leu(taa)                         |
| 1             | 107nt       | W1610135943 FACG01000134 Firmicutes Peptoclostridium     |
| Cluster 31479 |             |                                                          |
| 0             | 86nt        | tRNA-Salmonella_phage_PVP-SE1-Leu(taa)                   |
| 1             | 106nt       | W1610856935 LQOE01000134 Firmicutes Lactococcus          |
| Cluster 31975 |             |                                                          |
| 0             | 81nt        | tRNA-Salmonella_phage_100268_sal2-Leu(tag)               |
| 1             | 105nt       | C011616 CP000413 Firmicutes Lactobacillus                |
| 2             | 105nt       | C011639 CP000413 Firmicutes Lactobacillus                |
| 3             | 105nt       | C011868 AE017198 Firmicutes Lactobacillus                |
| Cluster 32432 |             |                                                          |
| 0             | 86nt        | tRNA-Klebsiella_phage_vB_KpnM_BIS47-Leu(tag)             |
| 1             | 105nt       | C09107584 CP001674 Betaproteobacteria Methylovorus       |
| 2             | 105nt       | C11114217 CP002252 Betaproteobacteria Methylovorus       |
| 3             | 105nt       | C151104070 LN794158 Betaproteobacteria Candidatus        |
| Cluster 36399 |             |                                                          |
| 0             | 85nt        | tRNA-Pseudomonas_phage_C11-Leu(tag)                      |
| 1             | 105nt       | W141754977 JNWH01000027 Betaproteobacteria Delftia       |
| 2             | 105nt       | W141755051 JNWI01000023 Betaproteobacteria Delftia       |
| Cluster 38155 |             |                                                          |
| 0             | 84nt        | tRNA-Aeromonas_phage_phiAS5-Leu(tag)                     |
| 1             | 105nt       | W1610723227 LMDF01000007 Alphaproteobacteria Caulobacter |
| Cluster 41419 |             |                                                          |
| 0             | 76nt        | tRNA-Stenotrophomonas_phage_vB_SmaS-DLP_6-Phe(gaa)       |
| 1             | 96nt        | W09128534 ACLU01000020 Firmicutes Bacillus               |
| 2             | 96nt        | W09128547 ACLU01000025 Firmicutes Bacillus               |
| 3             | 96nt        | W09128611 ACLV01000016 Firmicutes Bacillus               |
| Cluster 41790 |             |                                                          |
| 0             | 79nt        | tRNA-Pseudomonas_phage_C11-Asp(gtc)                      |
| 1             | 79nt        | tRNA-Pseudomonas_phage_JG004-Asp(gtc)                    |
| 2             | 99nt        | W141754978 JNWH01000027 Betaproteobacteria Delftia       |
| 3             | 99nt        | W141755052 JNWI01000023 Betaproteobacteria Delftia       |
| Cluster 43070 |             |                                                          |
| 0             | 76nt        | tRNA-Mycobacterium_phage_Myrna-Asp(gtc)                  |
| 1             | 98nt        | C10110207 CP001744 Planctomycetes Planctomyces           |

## Sheet1

|               |      |                                                             |
|---------------|------|-------------------------------------------------------------|
| 2             | 98nt | W09109628 ABUK01000001 Planctomycetes Planctomyces          |
| Cluster 43905 |      |                                                             |
| 0             | 75nt | tRNA-Mycobacterium_phage_Alice-Pro(tgg)                     |
| 1             | 98nt | W09117867 ACCL02000010 Firmicutes Bryantella                |
| Cluster 44948 |      |                                                             |
| 0             | 77nt | tRNA-Agrobacterium_phage_Atu_ph07-Pro(tgg)                  |
| 1             | 98nt | W141220922 AZYH01000006 Bacteroidetes Cytophaga             |
| 2             | 98nt | W141228737 BAMD01000049 Bacteroidetes Cytophaga             |
| Cluster 45185 |      |                                                             |
| 0             | 78nt | tRNA-Pseudomonas_phage_C11-Pro(tgg)                         |
| 1             | 78nt | tRNA-Pseudomonas_phage_PaP1-Pro(tgg)                        |
| 2             | 98nt | W141754981 JNWH01000027 Betaproteobacteria Delftia          |
| 3             | 98nt | W141755055 JNWI01000023 Betaproteobacteria Delftia          |
| Cluster 47275 |      |                                                             |
| 0             | 76nt | tRNA-Mycobacterium_phage_Tonenili-Asp(gtc)                  |
| 1             | 98nt | W1610735634 LMMR01000005 Actinobacteria Leifsonia           |
| Cluster 47740 |      |                                                             |
| 0             | 74nt | tRNA-Synechococcus_phage_S-PM2-Pro(tgg)                     |
| 1             | 98nt | W1610948307 LVBB01000080 Planctomycetes Phycisphaerales     |
| Cluster 49461 |      |                                                             |
| 0             | 76nt | tRNA-Acinetobacter_virus_133-Met(cat)                       |
| 1             | 97nt | C010423 CP000155 Gammaproteobacteria Hahella                |
| Cluster 50326 |      |                                                             |
| 0             | 77nt | tRNA-Vibrio_phage_pVp-1-Arg(tct)                            |
| 1             | 97nt | C017634 CR354531 Gammaproteobacteria Photobacterium         |
| 2             | 97nt | W141261176 CCAR010000004 Gammaproteobacteria Photobacterium |
| 3             | 97nt | W1610772577 LNTE01000004 Gammaproteobacteria Photobacterium |
| Cluster 50605 |      |                                                             |
| 0             | 77nt | tRNA-Stenotrophomonas_phage_vB_SmaS-DLP_6-Arg(acg)          |
| 1             | 97nt | C020930 CP000302 Gammaproteobacteria Shewanella             |
| 2             | 97nt | C021957 CP000447 Gammaproteobacteria Shewanella             |
| 3             | 97nt | C08010136 CP000851 Gammaproteobacteria Shewanella           |
| Cluster 51063 |      |                                                             |
| 0             | 78nt | tRNA-Stenotrophomonas_phage_vB_SmaS-DLP_6-Pro(cgg)          |
| 1             | 97nt | C026950 AE008923 Gammaproteobacteria Xanthomonas            |
| 2             | 97nt | C027028 CP000050 Gammaproteobacteria Xanthomonas            |
| 3             | 97nt | C027058 AE008922 Gammaproteobacteria Xanthomonas            |
| Cluster 52567 |      |                                                             |
| 0             | 76nt | tRNA-Klebsiella_phage_vB_Kpn_IME260-Arg(tct)                |
| 1             | 97nt | C09110565 CP001616 Gammaproteobacteria Tolumonas            |
| 2             | 97nt | W141215849 AZUK01000002 Gammaproteobacteria Tolumonas       |
| 3             | 97nt | W1511481617 JWJV01000040 Gammaproteobacteria Leclercia      |

## Sheet1

|               |      |                                                              |
|---------------|------|--------------------------------------------------------------|
| Cluster 55830 |      |                                                              |
| 0             | 77nt | tRNA-Cronobacter_phage_CR3-Pro(tgg)                          |
| 1             | 77nt | tRNA-Cronobacter_phage_CR8-Pro(tgg)                          |
| 2             | 97nt | C121006667 CP003147 Alphaproteobacteria Pseudovibrio         |
| 3             | 97nt | C121006668 CP003147 Alphaproteobacteria Pseudovibrio         |
| 4             | 97nt | W09112032 ABXL01000044 Alphaproteobacteria Pseudovibrio      |
| Cluster 59901 |      |                                                              |
| 0             | 75nt | tRNA-Stenotrophomonas_phage_vB_SmaS-DLP_6-Gly(gcc)           |
| 1             | 97nt | C153001053 CP011211 CandidatusSaccharibacteria Candidatus    |
| Cluster 59918 |      |                                                              |
| 0             | 77nt | tRNA-Klebsiella_phage_PKO111-Arg(tct)                        |
| 1             | 97nt | C161000074 AP013035 Aquificae Thermosulfidibacter            |
| Cluster 61235 |      |                                                              |
| 0             | 77nt | tRNA-Citrobacter_phage_Michonne-Asn(gtt)                     |
| 1             | 77nt | tRNA-Citrobacter_phage_Mordin-Asn(gtt)                       |
| 2             | 77nt | tRNA-Escherichia_phage_SUSP1-Asn(gtt)                        |
| 3             | 97nt | C161074178 CP014608 Gammaproteobacteria Obesumbacterium      |
| 4             | 97nt | W121008412 AGC101000083 Gammaproteobacteria Hafnia           |
| 5             | 97nt | W1610995009 LLEX01000134 Gammaproteobacteria Obesumbacterium |
| Cluster 61456 |      |                                                              |
| 0             | 77nt | tRNA-Aeromonas_phage_65.2-Met(cat)                           |
| 1             | 97nt | C161087196 CP015403 Betaproteobacteria Burkholderiales       |
| 2             | 97nt | W10110999 ADCQ01000047 Betaproteobacteria Burkholderiales    |
| 3             | 97nt | W11113663 ADCQ01000047 Betaproteobacteria Burkholderiales    |
| Cluster 63050 |      |                                                              |
| 0             | 76nt | tRNA-Bacillus_phage_BCP8-2-Glu(ttc)                          |
| 1             | 76nt | tRNA-Bacillus_phage_Deep_Blue-Glu(ttc)                       |
| 2             | 77nt | tRNA-Bacillus_virus_BM15-Glu(ttc)                            |
| 3             | 77nt | tRNA-Bacillus_cereus_bacteriophage_vB_BceM_Bc431v3-Glu(ttc)  |
| 4             | 77nt | tRNA-Bacillus_phage_JBP901-Glu(ttc)                          |
| 5             | 97nt | W09131060 ACMZ01000145 Firmicutes Bacillus                   |
| 6             | 97nt | W131186879 ARXZ01004211 Firmicutes Bacillus                  |
| 7             | 97nt | W1610794030 LOMO01000001 Firmicutes Bacillus                 |
| Cluster 63051 |      |                                                              |
| 0             | 75nt | tRNA-Bacillus_phage_PBC6-Glu(ttc)                            |
| 1             | 97nt | W09131066 ACMZ01000145 Firmicutes Bacillus                   |
| 2             | 97nt | W131186885 ARXZ01004212 Firmicutes Bacillus                  |
| 3             | 97nt | W1610794036 LOMO01000001 Firmicutes Bacillus                 |
| Cluster 63959 |      |                                                              |
| 0             | 75nt | tRNA-Mycobacteriophage_Bxz1-Pro(tgg)                         |
| 1             | 73nt | tRNA-Mycobacterium_phage_Bigswole-Pro(tgg)                   |
| 2             | 97nt | W11143186 AEPQ01000255 Cyanobacteria Lyngbya                 |
| Cluster 65045 |      |                                                              |
| 0             | 75nt | tRNA-Mycobacteriophage_Catera-Glu(ctc)                       |
| 1             | 75nt | tRNA-Mycobacterium_phage_ArcherS7-Glu(ctc)                   |

## Sheet1

|               |      |                                                       |
|---------------|------|-------------------------------------------------------|
| 2             | 97nt | W121018352 AGSZ01000707 Actinobacteria Mycobacterium  |
| 3             | 97nt | W1511629795 LDCO01000003 Actinobacteria Mycobacterium |
| 4             | 97nt | W1511640156 LDPU01000003 Actinobacteria Mycobacterium |
| Cluster 65862 |      |                                                       |
| 0             | 73nt | tRNA-Gordonia_phage_GMA2-Lys(ctt)                     |
| 1             | 96nt | C161037750 CP011883 Actinobacteria Mycobacterium      |
| 2             | 97nt | W121123663 BAED01000061 Actinobacteria Gordonia       |
| 3             | 96nt | W131060187 ANHL01000007 Actinobacteria Mycobacterium  |
| Cluster 66172 |      |                                                       |
| 0             | 77nt | tRNA-Bacillus_phage_vB_BanS-Tsamsa-Gln(ttg)           |
| 1             | 97nt | W131004729 AHDZ01000070 Firmicutes Bacillus           |
| Cluster 66176 |      |                                                       |
| 0             | 75nt | tRNA-Bacillus_phage_BCP8-2-Arg(tct)                   |
| 1             | 97nt | W131004736 AHDZ01000070 Firmicutes Bacillus           |
| Cluster 70777 |      |                                                       |
| 0             | 74nt | tRNA-Streptomyces_phage_BRock-Arg(tct)                |
| 1             | 97nt | W131230103 AUHI01000015 Firmicutes Halalkalibacillus  |
| Cluster 76100 |      |                                                       |
| 0             | 76nt | tRNA-Pseudomonas_phage_C11-Lys(ttt)                   |
| 1             | 77nt | tRNA-Pseudomonas_phage_JG004-Lys(ttt)                 |
| 2             | 76nt | tRNA-Pseudomonas_phage_Zigelbrucke-Lys(ttt)           |
| 3             | 97nt | W141754976 JNWH01000027 Betaproteobacteria Delftia    |
| 4             | 97nt | W141755050 JNWI01000023 Betaproteobacteria Delftia    |
| Cluster 76101 |      |                                                       |
| 0             | 77nt | tRNA-Pseudomonas_phage_JG004-Phe(gaa)                 |
| 1             | 97nt | W141754983 JNWH01000027 Betaproteobacteria Delftia    |
| 2             | 97nt | W141755057 JNWI01000023 Betaproteobacteria Delftia    |
| Cluster 80730 |      |                                                       |
| 0             | 76nt | tRNA-Stenotrophomonas_phage_IME-SM1-Ala(tgc)          |
| 1             | 97nt | W1511607578 LCCW01000032 Parcubacteria Parcubacteria  |
| Cluster 81631 |      |                                                       |
| 0             | 74nt | tRNA-Mycobacterium_phage_Myrna-Lys(ctt)               |
| 1             | 97nt | W1511685519 LFOD01000039 Actinobacteria Mycobacterium |
| Cluster 83568 |      |                                                       |
| 0             | 76nt | tRNA-Stenotrophomonas_phage_vB_SmaS-DLP_6-Ala(tgc)    |
| 1             | 96nt | C012545 CP000705 Firmicutes Lactobacillus             |
| 2             | 96nt | C012566 CP000705 Firmicutes Lactobacillus             |
| 3             | 96nt | C012578 CP000705 Firmicutes Lactobacillus             |
| Cluster 83806 |      |                                                       |
| 0             | 78nt | tRNA-Serratia_phage_CBH8-Pro(tgg)                     |
| 1             | 97nt | W1610135945 FACG01000134 Firmicutes Peptoclostridium  |
| Cluster 86236 |      |                                                       |

## Sheet1

|               |      |                                                          |
|---------------|------|----------------------------------------------------------|
| 0             | 77nt | tRNA-Ralstonia_phage_RSP15-Lys(ttt)                      |
| 1             | 97nt | W1610662946 LJUE01000017 Planctomycetes Planctomycetes   |
| Cluster 87966 |      |                                                          |
| 0             | 75nt | tRNA-Mycobacterium_phage_Myrna-Met(cat)                  |
| 1             | 97nt | W1610816846 LPBG01000047 Betaproteobacteria Burkholderia |
| 2             | 97nt | W1610817075 LPBJ01000047 Betaproteobacteria Burkholderia |
| 3             | 97nt | W1610825155 LPGQ01000069 Betaproteobacteria Burkholderia |
| Cluster 91356 |      |                                                          |
| 0             | 75nt | tRNA-Agrobacterium_phage_Atu_ph07-Val(tac)               |
| 1             | 96nt | C002024 CP000524 Alphaproteobacteria Bartonella          |
| 2             | 96nt | C003014 BX897699 Alphaproteobacteria Bartonella          |
| 3             | 96nt | C08002161 AM260525 Alphaproteobacteria Bartonella        |
| Cluster 92259 |      |                                                          |
| 0             | 74nt | tRNA-Mycobacterium_phage_ArcherS7-Gly(gcc)               |
| 1             | 96nt | C009864 CU207366 Bacteroidetes Gramella                  |
| 2             | 96nt | C10114648 CP001650 Bacteroidetes Zunongwangia            |
| 3             | 96nt | C161027990 CP010535 Bacteroidetes Sediminicola           |
| Cluster 92788 |      |                                                          |
| 0             | 76nt | tRNA-Bacillus_phage_PBC6-Thr(tgt)                        |
| 1             | 76nt | tRNA-Bacillus_phage_TsarBomba-Thr(tgt)                   |
| 2             | 96nt | C013490 L43967 Tenericutes Mycoplasma                    |
| 3             | 96nt | C013970 U00089 Tenericutes Mycoplasma                    |
| 4             | 96nt | C10109513 CP002077 Tenericutes Mycoplasma                |
| Cluster 93682 |      |                                                          |
| 0             | 76nt | tRNA-Synechococcus_phage_S-PM2-Arg(tct)                  |
| 1             | 96nt | C021098 AP008231 Cyanobacteria Synechococcus             |
| 2             | 96nt | C021141 CP000100 Cyanobacteria Synechococcus             |
| 3             | 96nt | C151009174 CP006471 Cyanobacteria Synechococcus          |
| Cluster 94404 |      |                                                          |
| 0             | 76nt | tRNA-Cronobacter_phage_CR9-Thr(tgt)                      |
| 1             | 96nt | C08001614 CP001016 Alphaproteobacteria Beijerinckia      |
| Cluster 96376 |      |                                                          |
| 0             | 74nt | tRNA-Mycobacteriophage_Bxz1-Gly(gcc)                     |
| 1             | 74nt | tRNA-Mycobacterium_phage_ScottMcG-Gly(gcc)               |
| 2             | 96nt | C10102650 CP002046 Bacteroidetes Croceibacter            |
| 3             | 96nt | C151098504 FP476056 Bacteroidetes Zobellia               |
| 4             | 96nt | W121063876 AJLT01000019 Bacteroidetes Gillisia           |
| Cluster 98191 |      |                                                          |
| 0             | 77nt | tRNA-Vibrio_phage_vB_VorS-PVo5-Lys(ttt)                  |
| 1             | 96nt | C11107054 CP002432 Chrysiogenetes Desulfurispirillum     |
| 2             | 96nt | W10114085 ADGU01000009 Unknown bacterium                 |
| 3             | 96nt | W11117421 ADGU01000009 Unknown bacterium                 |
| Cluster 98467 |      |                                                          |
| 0             | 73nt | tRNA-Streptomyces_phage_BRock-Asn(gtt)                   |

## Sheet1

|                |      |                                                            |
|----------------|------|------------------------------------------------------------|
| 1              | 96nt | C11111436 CP002343 Actinobacteria Intrasporangium          |
| 2              | 96nt | W141142510 AWQS01000365 Actinobacteria Intrasporangium     |
| 3              | 96nt | W141143049 AWSA01000002 Actinobacteria Intrasporangium     |
| Cluster 98933  |      |                                                            |
| 0              | 76nt | tRNA-Aeromonas_phage_phiAS5-Lys(ttt)                       |
| 1              | 96nt | C11118132 CP002446 Gammaproteobacteria Pseudoxanthomonas   |
| 2              | 96nt | C151077912 CP011144 Gammaproteobacteria Pseudoxanthomonas  |
| 3              | 96nt | W131230617 AUHT01000010 Gammaproteobacteria Lysobacter     |
| Cluster 99194  |      |                                                            |
| 0              | 76nt | tRNA-Agrobacterium_phage_Atu_ph07-Trp(cca)                 |
| 1              | 96nt | C11122369 CP001841 Spirochaetes Treponema                  |
| Cluster 104234 |      |                                                            |
| 0              | 76nt | tRNA-Klebsiella_phage_KPV15-His(gtg)                       |
| 1              | 96nt | C151101531 HG917868 Firmicutes Clostridium                 |
| Cluster 108267 |      |                                                            |
| 0              | 74nt | tRNA-Bacillus_phage_BCU4-Asp(gtc)                          |
| 1              | 74nt | tRNA-Bacillus_phage_Deep_Blue-Asp(gtc)                     |
| 2              | 96nt | W09131059 ACMZ01000145 Firmicutes Bacillus                 |
| 3              | 96nt | W131186878 ARXZ01004211 Firmicutes Bacillus                |
| 4              | 96nt | W1610794029 LOMO01000001 Firmicutes Bacillus               |
| Cluster 110204 |      |                                                            |
| 0              | 76nt | tRNA-Cronobacter_phage_CR3-Thr(tgt)                        |
| 1              | 96nt | W11187313 CAEE01000349 Betaproteobacteria Chromobacterium  |
| 2              | 96nt | W121126948 CAEE01000349 Betaproteobacteria Chromobacterium |
| Cluster 111939 |      |                                                            |
| 0              | 73nt | tRNA-Bacillus_phage_Bcp1-Pro(tgg)                          |
| 1              | 96nt | W131004066 AHCU01000068 Firmicutes Bacillus                |
| 2              | 96nt | W131004258 AHCW01000066 Firmicutes Bacillus                |
| Cluster 111940 |      |                                                            |
| 0              | 75nt | tRNA-Bacillus_phage_PBC2-Asn(gtt)                          |
| 1              | 96nt | W131004727 AHDZ01000070 Firmicutes Bacillus                |
| Cluster 112773 |      |                                                            |
| 0              | 73nt | tRNA-Enterococcus_phage_EFDG1-Ala(tgc)                     |
| 1              | 96nt | W131109850 APIS01000061 Firmicutes Salinibacillus          |
| Cluster 114642 |      |                                                            |
| 0              | 76nt | tRNA-Streptomyces_phage_BRock-Thr(ggt)                     |
| 1              | 96nt | W131179546 ARMM01000005 Actinobacteria Zimmermannella      |
| Cluster 119675 |      |                                                            |
| 0              | 77nt | tRNA-Stenotrophomonas_phage_vB_SmaS-DLP_6-Pro(tgg)         |
| 1              | 96nt | W141167917 AXUN02000006 Firmicutes Youngiibacter           |
| Cluster 123412 |      |                                                            |
| 0              | 76nt | tRNA-Pseudomonas_phage_C11-Cys(gca)                        |

## Sheet1

|                |      |                                                            |
|----------------|------|------------------------------------------------------------|
| 1              | 76nt | tRNA-Pseudomonas_phage_PaP1-Cys(gca)                       |
| 2              | 96nt | W141754979 JNWH01000027 Betaproteobacteria Delftia         |
| 3              | 96nt | W141755053 JNWI01000023 Betaproteobacteria Delftia         |
| Cluster 123413 |      |                                                            |
| 0              | 78nt | tRNA-Pseudomonas_phage_C11-Asn(gtt)                        |
| 1              | 76nt | tRNA-Pseudomonas_phage_JG004-Asn(gtt)                      |
| 2              | 96nt | W141754980 JNWH01000027 Betaproteobacteria Delftia         |
| 3              | 96nt | W141755054 JNWI01000023 Betaproteobacteria Delftia         |
| Cluster 123414 |      |                                                            |
| 0              | 76nt | tRNA-Pseudomonas_phage_C11-Gly(tcc)                        |
| 1              | 96nt | W141754982 JNWH01000027 Betaproteobacteria Delftia         |
| 2              | 96nt | W141755056 JNWI01000023 Betaproteobacteria Delftia         |
| Cluster 123415 |      |                                                            |
| 0              | 76nt | tRNA-Pseudomonas_phage_C11-Glu(ttc)                        |
| 1              | 76nt | tRNA-Pseudomonas_phage_PaP1-Glu(ttc)                       |
| 2              | 76nt | tRNA-Pseudomonas_phage_vB_PaeM_C2-10_Ab1-Glu(ttc)          |
| 3              | 96nt | W141754984 JNWH01000027 Betaproteobacteria Delftia         |
| 4              | 96nt | W141755058 JNWI01000023 Betaproteobacteria Delftia         |
| Cluster 124683 |      |                                                            |
| 0              | 76nt | tRNA-Pseudomonas_phage_C11-Ile(gat)                        |
| 1              | 76nt | tRNA-Pseudomonas_phage_JG004-Ile(gat)                      |
| 2              | 76nt | tRNA-Pseudomonas_phage_PaP1-Ile(gat)                       |
| 3              | 96nt | W143017841 JNWH01000027 Betaproteobacteria Delftia         |
| 4              | 96nt | W143017845 JNWI01000023 Betaproteobacteria Delftia         |
| Cluster 125389 |      |                                                            |
| 0              | 74nt | tRNA-Mycobacterium_phage_Rey-Asn(gtt)                      |
| 1              | 96nt | W1510545397 CSTU01000066 Actinobacteria Mycobacterium      |
| 2              | 96nt | W1510547779 CSVM01000001 Actinobacteria Mycobacterium      |
| 3              | 96nt | W1510548503 CSVY01000067 Actinobacteria Mycobacterium      |
| Cluster 127479 |      |                                                            |
| 0              | 76nt | tRNA-Klebsiella_phage_JD18-Thr(tgt)                        |
| 1              | 76nt | tRNA-Klebsiella_phage_vB_KpnM_KpV477-Thr(tgt)              |
| 2              | 96nt | W1511568117 LAIR01000002 Actinobacteria Luteipulveratus    |
| Cluster 129516 |      |                                                            |
| 0              | 73nt | tRNA-Mycobacteriophage_Bxz1-Lys(ctt)                       |
| 1              | 74nt | tRNA-Mycobacterium_phage_BeanWater-Lys(ctt)                |
| 2              | 96nt | W1511616702 LCOM01000012 Parcubacteria Parcubacteria       |
| Cluster 132072 |      |                                                            |
| 0              | 76nt | tRNA-Enterobacter_phage_PG7-Thr(tgt)                       |
| 1              | 96nt | W1610074267 BCWN01000019 Betaproteobacteria Castellaniella |
| Cluster 133046 |      |                                                            |
| 0              | 76nt | tRNA-Pseudomonas_phage_phiPsa374-Gly(tcc)                  |
| 1              | 96nt | W1610521213 JJOE01000066 Gammaproteobacteria Pseudomonas   |

## Sheet1

|                |      |                                                                |
|----------------|------|----------------------------------------------------------------|
| Cluster 136783 |      |                                                                |
| 0              | 72nt | tRNA-Mycobacterium_phage_Myrna-?(Lys Stop)(tt)                 |
| 1              | 96nt | W1610752717 LNDT01000028 Deltaproteobacteria Bdellovibrionales |
| Cluster 140608 |      |                                                                |
| 0              | 73nt | tRNA-Listeria_phage_List-36-Gln(ttg)                           |
| 1              | 95nt | C002667 AP006627 Firmicutes Bacillus                           |
| 2              | 95nt | C011683 AL592022 Firmicutes Listeria                           |
| 3              | 95nt | C012185 AE017262 Firmicutes Listeria                           |
| Cluster 141221 |      |                                                                |
| 0              | 73nt | tRNA-Bacillus_phage_BCP78-Gln(ttg)                             |
| 1              | 95nt | C013494 L43967 Tenericutes Mycoplasma                          |
| 2              | 95nt | C013974 U00089 Tenericutes Mycoplasma                          |
| 3              | 95nt | C10109517 CP002077 Tenericutes Mycoplasma                      |
| Cluster 141691 |      |                                                                |
| 0              | 75nt | tRNA-Serratia_phage_X20-Glu(ttc)                               |
| 1              | 95nt | C022624 CP000377 Alphaproteobacteria Silicibacter              |
| 2              | 95nt | C022625 CP000377 Alphaproteobacteria Silicibacter              |
| 3              | 95nt | C161085274 CP015230 Alphaproteobacteria Ruegeria               |
| Cluster 142108 |      |                                                                |
| 0              | 72nt | tRNA-Synechococcus_phage_S-PM2-Val(tac)                        |
| 1              | 95nt | C08003964 CP000806 Cyanobacteria Cyanotheca                    |
| 2              | 95nt | W11181455 AGJC01000005 Cyanobacteria Cyanotheca                |
| 3              | 95nt | w023474 AAXW01000075 Cyanobacteria Cyanotheca                  |
| Cluster 142868 |      |                                                                |
| 0              | 74nt | tRNA-Streptomyces_phage_BRock-Thr(tgt)                         |
| 1              | 95nt | C10100660 AP011163 Alphaproteobacteria Acetobacter             |
| 2              | 95nt | C10100714 AP011121 Alphaproteobacteria Acetobacter             |
| 3              | 95nt | C10100771 AP011128 Alphaproteobacteria Acetobacter             |
| Cluster 144983 |      |                                                                |
| 0              | 72nt | tRNA-Synechococcus_phage_S-PM2-Gly(tcc)                        |
| 1              | 95nt | C131004519 CP003597 Cyanobacteria Chroococcidiopsis            |
| 2              | 95nt | W1511401774 JTJC01000084 Cyanobacteria Scytonema               |
| Cluster 150333 |      |                                                                |
| 0              | 74nt | tRNA-Bacillus_cereus_bacteriophage_vB_BceM_Bc431v3-Asp(gtc)    |
| 1              | 95nt | W131004063 AHCU01000068 Firmicutes Bacillus                    |
| 2              | 95nt | W131004255 AHCW01000066 Firmicutes Bacillus                    |
| Cluster 156045 |      |                                                                |
| 0              | 76nt | tRNA-Pseudomonas_phage_C11-Arg(tct)                            |
| 1              | 75nt | tRNA-Pseudomonas_phage_JG004-Arg(tct)                          |
| 2              | 75nt | tRNA-Pseudomonas_phage_PaP1-Arg(tct)                           |
| 3              | 75nt | tRNA-Pseudomonas_phage_Zigelbrucke-Arg(tct)                    |
| 4              | 95nt | W141754975 JNWH01000027 Betaproteobacteria Delftia             |
| 5              | 95nt | W141755049 JNWI01000023 Betaproteobacteria Delftia             |
| Cluster 161518 |      |                                                                |

## Sheet1

|                |      |                                                             |
|----------------|------|-------------------------------------------------------------|
| 0              | 74nt | tRNA-Lactobacillus_phage_LpeD-Asn(gtt)                      |
| 1              | 95nt | W1610032431 AYZQ01000002 Firmicutes Lactobacillus           |
| Cluster 162601 |      |                                                             |
| 0              | 75nt | tRNA-Pseudomonas_phage_phiPsa374-Cys(gca)                   |
| 1              | 95nt | W1610521212 JJOE01000066 Gammaproteobacteria Pseudomonas    |
| Cluster 164387 |      |                                                             |
| 0              | 75nt | tRNA-Synechococcus_phage_S-PM2-Glu(ttc)                     |
| 1              | 95nt | W1610748196 LMYZ01000114 Chlorobi Chlorobi                  |
| Cluster 164817 |      |                                                             |
| 0              | 75nt | tRNA-Cronobacter_phage_vB_CsaM_GAP31-Arg(tct)               |
| 1              | 75nt | tRNA-Enterobacteria_phage_4MG-Arg(tct)                      |
| 2              | 75nt | tRNA-Salmonella_phage_PVP-SE1-Arg(tct)                      |
| 3              | 95nt | W1610856936 LQOE01000134 Firmicutes Lactococcus             |
| Cluster 165337 |      |                                                             |
| 0              | 72nt | tRNA-Synechococcus_phage_S-CRM01-Pro(tgg)                   |
| 1              | 95nt | W1610947072 LUZR01000002 Betaproteobacteria Burkholderiales |
| Cluster 170651 |      |                                                             |
| 0              | 71nt | tRNA-Bacillus_phage_Deep_Blue-His(gtg)                      |
| 1              | 73nt | tRNA-Bacillus_phage_vB_BanS-Tsamsa-His(gtg)                 |
| 2              | 94nt | W131004730 AHDZ01000070 Firmicutes Bacillus                 |
| Cluster 173292 |      |                                                             |
| 0              | 74nt | tRNA-Pseudomonas_phage_C11-Gln(ttg)                         |
| 1              | 74nt | tRNA-Pseudomonas_phage_JG004-Gln(ttg)                       |
| 2              | 94nt | W141754974 JNWH01000027 Betaproteobacteria Delftia          |
| 3              | 94nt | W141755048 JNWI01000023 Betaproteobacteria Delftia          |
| Cluster 177637 |      |                                                             |
| 0              | 74nt | tRNA-Salmonella_phage_PVP-SE1-Cys(gca)                      |
| 1              | 94nt | W1610856937 LQOE01000134 Firmicutes Lactococcus             |

---
