# Supplementary material for: Global In-Silico Scenario of tRNA Genes and Their Organization in Virus Genomes
Source: MDPI journal article supplement (doi:10.3390/v11020180), 2019-02-21
Supplement: s1 [file s1]

Table S2. List of the predicted tRNA genes in the classified virus genomes

Viral families are marked with '\*' and genomes with '>'.

\*Adenoviridae

- >U46933.1 Avian adenovirus CELO, complete genome  
1-tRNA-Ala(tgc)c[39758,39832]  
cgacagtgtagctcagccgtaagagcgtcggactgcactccggaggtcc  
ccagatcgaaactgggtactgccga
- >AF289262.1 Porcine adenovirus 5, complete genome  
1-tRNA-His(atg)c[20787,20870]  
gtggcagaaggccatggatgtggccatgagtcttatggcctctgaagg  
tagacaccaaggatcttaccttgctgccgacca
- >BK001452.1 TPA: Fowl adenovirus 1, complete genome  
1-tRNA-Ala(tgc)c[39758,39832]  
cgacagtgtagctcagccgtaagagcgtcggactgcactccggaggtcc  
ccagatcgaaactgggtactgccga
- >BK000411.1 TPA: Porcine adenovirus 5, complete genome  
1-tRNA-His(atg)c[20787,20870]  
gtggcagaaggccatggatgtggccatgagtcttatggcctctgaagg  
tagacaccaaggatcttaccttgctgccgacca
- >KC493646.1 Fowl adenovirus 5 strain 340, complete genome  
1-tRNA-Leu(taa)c[41720,41794]  
cggcggtagctcagctgtcagagcgtcggactaaaatccggaggacc  
ccagatcaaaactgggtatcgccga
- >KF477312.1 Turkey adenovirus 4 isolate TNI1, complete genome  
1-tRNA-Val(aac)c[39044,39118]  
cggcggcatagctcaggtggcagagcgtcggactaacagttcggaggtcc  
ccagatcgaaactgggtgcagtcga
- >KF477313.1 Turkey adenovirus 5 isolate 1277BT, complete genome  
1-tRNA-Phe(aaa)c[39871,39945]  
cggcggtagctcagccgtaagagcgtcgggtcaaaagtcggaggtcc  
ccagatcgaaactgggtatcgccga

\*Ascoviridae

- >DQ517337.1 Trichoplusia ni ascovirus 2c, complete genome  
1-tRNA-Ile(gat)c[86581,86653]  
agtccgttagctcagtggttagagcatcgtgctgataacacgagggtcgt  
aggttcaaatcctacatggacta  
1-2tRNA-Leu(taa)[126266,126347]  
gtcaggtggccgagtggtctaaggcgccagatttaagatctggttcct  
cgggagcgtgggttcgaacccacacctgaca  
1-3tRNA-Ile(tat)c[162750,162822]  
gcctcttagctcagtggttagagcatcggcttatacgggttgctgt

gagttcgattctcacaagaggta

>KJ755191.1 *Heliothis virescens* ascovirus 3f isolate LD135790, complete genome  
 1-tRNA-Ile(tat)c[43866,43938]  
 gtctcggtagcgcagtcggttagcgcacggtagcttatatcgccgtggtcgt  
 gagttcgatcctcaccgagaca

>JX491653.1 *Heliothis virescens* ascovirus 3g, complete genome  
 1-tRNA-Ile(tat)c[46219,46291]  
 gtctcggtagcgcagttggttagcgcacggtagcttatatcgccggtcgt  
 gagttcgatcctcaccgagaca

\*Baculoviridae

>U59461.2 *Mamestra configurata* NPV-A strain 90/2, complete genome  
 1-tRNA-Ile(tat)[17778,17852]  
 ggtgacgctggtgtaatggttagcatccgtgactataatcgcgaggagg  
 gcggttcgattccgccagttgctgc

>AF162221.1 *Xestia c-nigrum* granulovirus genome, complete sequence  
 1-tRNA-Asp(gtc)c[60066,60137]  
 tcctcggtagtatagtggtgagtagtgcgcctgtcacgaggagaccag  
 ggttcgattccctgccgaggag

>L22858.1 *Autographa californica* nucleopolyhedrovirus clone C6, complete genome  
 1-tRNA-Gln(ctg)[107991,108073]  
 gtctcagtagctcaaggtagagcgtacgctctggatcgatagatcttg  
 ctaaggttgtagttcaagtcgcctgagata

>AY349019.1 *Neodiprion lecontei* NPV, complete genome  
 1-tRNA-Ile(aat)c[11456,11529]  
 ggcccatagctcagttggt.agagcgtcgtgctaataacggaaggtcg  
 aaggttcgatcctttcatgggcca

>DQ486030.3 *Antheraea pernyi* nucleopolyhedrovirus, complete genome  
 1-tRNA-Lys(ttt)[95704,95789]  
 ttctcagtagctcaacggttagagcgtagcacttttcacgcttagatg  
 ttgctaaggttgcaagttcgaatctgcctgagata

>DQ813662.2 *Anticarsia gemmatilis* nucleopolyhedrovirus, complete genome  
 1-tRNA-Thr(agt)c[28449,28532]  
 gtctcagtagcttaatggttagagcgtggcgctagttatgtaaacaatgat  
 gacaaggttgcgagttcaagcctgcctgagata

>EU255577.1 *Helicoverpa armigera* granulovirus, complete genome  
 1-tRNA-Asp(gtc)c[57007,57078]  
 tcctcggtagtatagtggtgagtagtgcgcctgtcacgaggagaccag  
 ggttcgattcttgccgaggag

>JQ798165.1 *Mamestra brassicae* MNPV strain K1, complete genome  
 1-tRNA-Ile(tat)[17401,17475]  
 ggtgacgctggtgtaatggttagcatgagtgactataatcgcgacgatg  
 gtggttcgattccgccagttgctgc

>KR815466.1 *Anticarsia gemmatilis* multicapsid nucleopolyhedrovirus isolate AgMNPV-37, complete genome

1-tRNA-Thr(agt)c[27782,27865]  
gtctcagtagcttaatggtagagcgtggcgctagtattgtaaacatgat  
gacaaggttgcgagttcaagcctcgcctgagata

\*Dicistroviridae

>DQ288865.1 Homalodisca coagulata virus-1, complete genome

1-tRNA-Ala(cgc)[2402,2479]  
cggacagctggttagtgtgtttgatatttcgcacaacatcaagatttg  
ctcaggttcaaaccctgagctattga

\*Fuselloviridae

>AY370762.1 Fusellovirus SSV2, complete genome

1-tRNA-Gly(ccc)[2557,2630]  
ggggtctaggggtgtccccctaatgccggcctccaagccggtgatcc  
cgggttcaaatcccggcgccgca

>EU030938.1 Sulfolobus spindle-shaped virus 4, complete genome

1-tRNA-Glu(ttc)[7486,7563]  
gtgggggttttaggggtgtccccctaatcgggccttcgagcccggtg  
accgggttcaaatcccggcgccgac

>EU030939.1 Sulfolobus spindle-shaped virus 5, complete genome

1-tRNA-Gln(ctg)c[7518,7593]  
aacgggggtgtggggcggttacccccacagggtctggcccctgggacc  
agggttcgaatccctgcccggtacc

>FJ870915.1 Sulfolobus spindle-shaped virus 6, complete genome

1-tRNA-Gln(ctg)c[3758,3833]  
aacgggggtgtggggcggttccccccacagggtctggcccctgggacc  
agggttcgaatccctgcccggtacc

>KY579375.1 Sulfolobus spindle-shaped virus 3 strain REY 15/4, complete genome

1-tRNA-Glu(ttc)[3397,3474]  
gtgggggttttaggggtgtccccctaatcgggccttcgagcccggtg  
accgggttcaaatcccggcgccgac

\*Herpesviridae

>U97553.2 Murine herpesvirus 68 strain WUMS, complete genome

1-2tRNA-Gln(ctg)[487,562]  
ggccagggtagctcaatcggtagagcagcggtcctggagtcgctggtt  
ctcggttcaagcccagccctggtg  
1-3tRNA-Cys(aca)[894,967]  
gtcgggtagctcaaatggtagagtgaggccaacatagccagcagatc  
tcggttcaaaccgagccctgacc  
1-4tRNA-Met(cat)[1182,1255]  
gtcgggtagctcaattggtagagcggcaggctcatcccctgcaggttct  
cggttcaatcccgggtcccgcgc  
1-5tRNA-Thr(agt)[1588,1659]  
gccagggtagctcaattggtagagcatcaggctagtatcctgtcggttcc  
ggttcaagtcgggcccctggtt  
1-6tRNA-Trp(cca)[3675,3749]

tgccagcgtagctcaattgtagagcagcgccaccaagcctgcagggtc  
tcggttcaagtccggcgctggcat  
1-7tRNA-Arg(cct)[4946,5031]  
ggccagggtagctcaattgtagagcggcagacaccacctacgtggtcta  
gtctgtggatctcgggtcaagtcgagtcctggcca  
1-8tRNA-Gly(gcc)[5384,5460]  
caccagagtggctcacctgtagagcaccaggctgcccacctgttggt  
ctcggttcaaatccgagctctggtgac

>AJ004801.1 Bovine herpesvirus type 1.1 complete genome

1-1tRNA-Pro(cgg)c[103131,103223]  
cggcgcccgcgcgggctcggcgccccgggctcgggccccctgggcgccg  
ggcgctcgggcgcgagggccgggctcgggccccgggcgccg  
1-2tRNA-Pro(cgg)[134995,135087]  
cggcgcccgcgcgggctcggcgccccgggctcgggccccctgggcgccg  
ggcgctcgggcgcgagggccgggctcgggccccgggcgccg

>DQ149153.1 Cercopithecine herpesvirus 16 strain X313, complete genome

1-1tRNA-Val(gac)c[78214,78308]  
tcgggtctggccgagctggagcgcttcgagggccctcgacgcgccctgcg  
gcgcgagctcgagagcgaggcggttcgaccccgggcgcggc  
1-2tRNA-Pro(cgg)[84794,84874]  
gtgtccccggggccggcgcggtccggacgttctcggggacgtcgcggc  
ggacccccgggcctcctcgggggagcggtg

>KJ668231.1 Falconid herpesvirus 1 strain S-18, complete genome

1-1tRNA-Arg(cct)[4508,4586]  
tccctcgtagttcagtgtagaataccgcctcctcctcgggcgggaga  
ccgaggttcgattcctcgacgaggaaacc  
1-2tRNA-Arg(gcc)[6901,6992]  
tcctcgtagtatagcggctagtagcccccgggccgacccggcatacaga  
taccggccgcgggagaccggggttcgagtcgccgacgaggggt  
1-3tRNA-Ala(cgc)[8015,8094]  
tcctcgtagtttagagtagaacgcccacgtcttcgcgaggagaatgg  
gagaccggggttcgagtcgccgacggggat  
1-4tRNA-Asp(gtc)[8658,8730]  
tcctcgtagtatagtggttagtattccgtctgtcgcacgggagaccgg  
ggttcgattccccgacgaggagc  
1-5tRNA-Leu(gag)[9452,9525]  
gtccccgtttgtacattggtagtagtcccgtcgcgaggtgctgggattgcg  
gggttcgagtcgccggcggggaca  
1-6tRNA-Arg(tcg)[9685,9761]  
tcctcgtagtatagtggttagtacaaccggttcgcgggcgccgggag  
accgaggttcgattcctcggcgaggac  
1-7tRNA-SeC(tca)[10069,10145]  
tccccgttagtttagtggtataacaccatctcaccttggtagacgggag  
accggggttcgattccccgacggggac

tctcggtagtacaacgggtactacgcccgtatatatagagtaaacgg  
gagatcgggggttcgactccccgccgaggaa

1-10tRNA-Asp(gtc)[11730,11800]

tcctcgttagtatagtggtagtatgcccgctctgtcgcacgggagaccggg  
gttcgattccccgacgaggag

1-11tRNA-Asp(gtc)c[139353,139424]

tcctcgtagtatagtggttaataatccccgtttgtcgacgggagaccgg  
ggttcgaatccccgacgaggag

1-12tRNA-Gly(gcc)c[140378,140453]

ccctcgctagtatagtggttattacgctcggcgggtgcctaggccgagaga  
ccgggggttcgatccccggcgaggga

1-13tRNA-Ser(gct)c[140864,140946]

atcctcgttagtacagcggtagtacgccaaccaatagctatctgggtt  
ggaaaccgggggttcaactccccgacgaggatac

1-14tRNA-Ser(gga)c[141574,141647]

tccccgttagtacagtggcagtacgccgtccgtggagcggatggacaacc  
ggggttcgattccccgacggggca

1-15tRNA-Thr(ggt)c[142283,142365]

tgctcgtacgaggggttagtatgcccgatggtatatgtgtcacgc  
gggagaccgggggttcgactccccggcgaggcgt

1-16tRNA-Asn(gtt)c[142502,142584]

gtcctcgtagtacagcggtagtatacgcaattgactgtttgtcaggta  
gcgagagcgggggttcgactccccggcggggatt

1-17tRNA-Ser(gct)c[142745,142824]

ccctcattagtacagcggtagtacacccggacgctccacggacacacgg  
gagagcggggttcgactccccgatgagggc

1-18tRNA-Arg(ccg)c[143382,143473]

tctctgtagtatagcggctagtagcggcgccgacccggcatacaga  
taccggccgcgggagaccgggggttcgagtcacccgacgagggt

1-19tRNA-Arg(cct)c[145788,145866]

tccctcgtagttcagtggtagaatacccgctcctctccgggcgggaga  
ccgaggttcgattcctcgacgaggaaacc

>KT594769.1 Macropodid herpesvirus 1 isolate MaHV1.3076/08, complete genome

1-1tRNA-His(gtg)c[71838,71918]

ccggggggtagacgatggtggtctccgcattgtgataagtggggggatt  
cgaatttcaaggatcttatctgctctcgaa

>KX589235.1 Columbid alphaherpesvirus 1 strain HLJ, complete genome

1-tRNA-Arg(cct)[4508,4586]

tccctcgtagttcagtggtagaataccgcctcctctccgggcgggaga  
ccgaggttcgattcctcgacgaggaaacc

1-2tRNA-Arg(ccg)[6901,6992]

tctcgttagtatagcggctagtacgcccgcggccgacccggcatacaga  
taccggccgcgggagaccgggggttcgagtccccgacgagggt

1-3tRNA-Ala(cgc)[8016,8095]  
tcctcgtagtttagaggtagaacgcccacgtcttcgcgaggagaatgg  
gagaccggggttcgagtcacccgacggggat  
1-4tRNA-Asp(gtc)[8659,8731]  
tcctcgtagtatagtggttagtattcccgtctgtcgcacgggagaccgg  
ggttcgattccccgacaggagc  
1-5tRNA-Leu(gag)[9452,9525]  
gtccccgtttgtacattggtagtactcccgtcgcaggtgctgggattgcg  
gggttcgagtcacccggcggggaca  
1-6tRNA-Arg(tcg)[9687,9763]  
tcctcgtagtatagtggtagtacaaccggttcgcgcggcgccggggag  
accgaggttcgattcctcggcaggac  
1-7tRNA-SeC(tca)[10071,10147]  
tccccgttagtttagtggtataacacccatctcaccttggtagacgggag  
accggggttcgattccccgacggggac  
1-9tRNA-Tyr(ata)[11453,11534]  
tcctcgtagtacaacggttactacgcccgtatatatatagagtaaac  
gggagatcggggttcgactccccgccaggaa  
1-10tRNA-Asp(gtc)[11736,11806]  
tcctcgtagtatagtggttagtatgccgtctgtcgcacgggagaccggg  
gttcgattccccgacaggag  
1-11tRNA-Asp(gtc)c[139527,139598]  
tcctcgtagtatagtggttaatatccccgtttgtcgcacgggagaccgg  
ggttcgaatccccgacaggag  
1-12tRNA-Gly(gcc)c[140552,140627]  
ccctcgtagtatagtggttattacgctcggcggtagcctaggccgagaga  
ccggggttcgatccccggcgaggga  
1-13tRNA-Ser(gct)c[141038,141120]  
atcctcgtagtacagcggtagtacccaaccaatagctatctgggtt  
ggaaaccggggttcaactccccgacaggatac  
1-14tRNA-Ser(gga)c[141749,141822]  
tccccgttagtacagtggcagtacgccgtccgtggagcggatggacaacc  
ggggctcgattccccgacggggca  
1-15tRNA-Thr(ggt)c[142457,142539]  
tgccctgtagtacagggttagtatgccgtatggtatatgtgtcacgc  
gggagaccggggttcgactccccggcgaggcgt  
1-17tRNA-Ser(gct)c[142918,142997]  
ccctcattagtacagcggtagtacacccggacgctccacggacacacgg  
gagagcggggttcgactccccgatgaggc  
1-18tRNA-Arg(ccg)c[143555,143646]  
tcctcgtagtatagcggctagtagccccgcggccgacccggcatacaga  
taccggccgcgggagaccggggttcgagtcacccgacagggt  
1-19tRNA-Arg(cct)c[145961,146039]  
tcctcgtagttcagtggtagaataccgcctcctctccggcgggaga

ccgagggttcgattcctcgacgaggaacc

**\*Inoviridae**

- >JN402401.1 Uncultured phage WW–nAnB, complete genome  
1–tRNA–Ser(act)[1578,1646]  
gcgggggtggtgcaacgtacgacgccagtctactgaaactggaactgctgg  
ttcgaatccagatcccgca
- >KJ003982.1 Uncultured phage WW–nAnB strain 3, complete genome  
1–tRNA–Gln(ctg)[1837,1905]  
gcgggggtggtgcaacggtacgacgtcgctctgaacgcgaaactgtagg  
ttcgaatcctaaccgca
- >KJ003981.1 Uncultured phage WW–nAnB strain 2, complete genome  
1–tRNA–Gln(ctg)[1837,1910]  
ggcggggtagtgaatggtcgcatgtcactctctgaagtgagctgctg  
gttcgaatccagaccccgcaacca

**\*Iridoviridae**

- >AY380826.1 Lymphocystis disease virus – isolate China, complete genome  
1–tRNA–Leu(taa)c[169350,169425]  
ataatttctagttgagacatgaataatttttttaaaaaataaacaat  
tagaagttcaattttttaattctc
- >AY521625.1 Singapore grouper iridovirus, complete genome  
1–tRNA–Ile(tat)c[115610,115682]  
gctccagtagcgcaatcggcagcgctgtactataatccaaggtgt  
gagttcgatcctcacctggagca
- >DQ643392.1 Aedes taeniorhynchus iridescent virus, complete genome  
1–tRNA–Tyr(ata)c[3354,3443]  
ctctctataggggaaggagcccttgagcctatcgccccatagatca  
atttctggaattgtgtccaagaggccatatgagagggg
- >KR139659.1 Scale drop disease virus isolate C4575, partial genome  
1–tRNA–Ile(tat)[60628,60703]  
tgctctagtggcgcagttaggtagcgcgagtgctataacactgaggtc  
gtgagttcgatcctcacctagagcat

**\*Lipothrrixviridae**

- >AJ854042.1 Acidianus filamentous virus 2, partial genome  
1–tRNA–Lys(ctt)c[17151,17237]  
gggctcgtagcttagccaggtagagcaacgggctcttaacctaggagat  
accgtaggtcccgggttcgaatccggcgagccccgc

**\*Luteoviridae**

- >KU315178.1 Pepo aphid–borne yellows virus isolate RSA BB Marrow, complete genome  
1–tRNA–Arg(gcg)c[4996,5082]  
actctcctgtctgaaccaggtacgagcacttctgcaaggagtgttaa  
ggctctgtcttgaccgggttcagccagtgaggagt

**\*Marseilleviridae**

- >AP017398.1 Tokyovirus A1 DNA, nearly complete genome  
1–tRNA–His(gtg)[5265,5337]

gtggatataacttaataggtaaagtgacaatttgtgaagtgtaaataatg  
ggttcgattcccattattcaccc  
1-2tRNA-Leu(taa)[5341,5424]  
gtatcgtttggcgggaattggtagacgcgatgggcttaaacctattcca  
tgaggagtattggttcgattccaataacggttta

\*Mimiviridae

>HQ336222.2 Acanthamoeba polyphaga mimivirus, complete genome

1-1tRNA-Leu(taa)c[57234,57316]  
gcaaaggtggcggagtggtctaacgcggtagacttaagatctactatctt  
ttgatgtcgtgggttcgaatcccaccctttgca  
1-2tRNA-His(gtg)[352157,352227]  
gatccgtagtttagtggtagaactactgtttgtgggacggctgacacag  
gttcgattcctgtacgggtca  
1-3tRNA-Cys(gca)[352275,352346]  
ggatcgtagctcaatggtagagcgctgcctgcagagcgataggttatc  
agttcaattctgatacgtcct  
1-4tRNA-Trp(cca)[1129299,1129369]  
gacctgtagtttaatggtaaacggtagcctccagagtattgatactg  
gttcgattccggtataggtcc  
1-5tRNA-Leu(caa)[1139240,1139322]  
gcaaaggtggcggagtggtctaacgcggtagactcaagatctactatctt  
ttgatgtcgtgggttcgaatcccaccctttgca  
1-6tRNA-Leu(taa)[1167848,1167930]  
gcaaaggtggcggagtggtttaacgcgctggacttaagatctagtatcat  
ttgatatcgtgggttcgaatcccaccctttgca

>GU244497.1 Cafeteria roenbergensis virus BV-PW1, complete genome

1-1tRNA-Tyr(gta)[509015,509086]  
ctcgccttagctcagtggttagagcggcgactgtagtccgtaggtcact  
cgttcgaatcgggtaggtgaga  
1-2tRNA-Leu(taa)[509181,509265]  
gcatatgtgccgagtggtttaaggagacggttttaagcaccgttggtc  
cggcctcgaggttcgaatcctgtcatatgcacca  
1-3tRNA-Leu(taa)[509421,509504]  
gtatatgtgccgagtggtttaaggagacggttttaagcaccgttggtc  
cggcctcgaggttcgaatcctgtcatatacacc  
1-4tRNA-Lys(ttt)[509506,509583]  
gccttattagctcagttggattagagcagcaggcttttaacctgatggc  
gtgggttcgagttcccacataaggctcca  
1-6tRNA-Leu(taa)[509911,509993]  
gcatatgtgccgagtggtttaaggagacggttttaagcaccgttggtc  
cggcctcgaggttcgaatcctgtcatatgcac  
1-7tRNA-Tyr(ata)[510066,510135]  
gtcactttagcttaagggtaaagcaacaacattatacttgtgaatgtagg  
ttcgattcctacaagtgaca



1-8tRNA-Leu(taa)[510177,510261]  
gcataatgtgtccgagtggtttaaggagacggtttaagcaccgttggtc  
cggcctcgcaggttcgaatcctgtcatatgcacca  
1-9tRNA-Leu(taa)[510417,510501]  
gtatatgtgtccgagtggtttaaggagacggtttaagcaccgttggtc  
cggcctcgcaggttcgaatcctgtcatatacacca  
1-10tRNA-Leu(taa)[510656,510739]  
gtatatgtgtccgagtggtttaaggagacggtttaagcaccgttggtc  
cggcctcgcaggttcgaatcctgtcatatacacc  
1-11tRNA-Lys(ttt)[510741,510818]  
gccttattagctcagttggattagagcagcaggctttaacctgatggc  
gtgggttcgaatcccacataaggctcca  
1-12tRNA-Leu(taa)[511091,511175]  
gcataatgtgtccgagtggtttaaggagacggtttaagcaccgttggtc  
cggcctcgcaggttcgaatcctgtcatatgcacca  
1-13tRNA-Leu(taa)[511330,511414]  
gtatatgtgtccgagtggtttaaggagacggtttaagcaccgttggtc  
cggcctcgcaggttcgaatcctgtcatatacacca  
1-14tRNA-Leu(taa)[511570,511653]  
gtatatgtgtccgagtggtttaaggagacggtttaagcaccgttggtc  
cggcctcgcaggttcgaatcctgtcatatacacc  
1-15tRNA-Lys(ttt)[511655,511732]  
gccttattagctcagttggattagagcagcaggctttaacctgatggc  
gtgggttcgaatcccacataaggctcca  
1-16tRNA-Asn(gtt)[511736,511809]  
ggtagcgtagaacaattggttagttcaacagactgttaatctgaaggtg  
ttggttcgagtcacccggtaccg

>JN258408.1 Megavirus chiliensis, complete genome

1-1tRNA-Leu(taa)c[15827,15909]  
gctaaggtggcggagtggtctaacgcgatagacttaagatctattatcat  
ttgatgtcgtgggttcaaatcccacccttagca  
1-2tRNA-Leu(caa)c[16963,17045]  
gctaaggtggcggagtggtctaacgcgtagactcaagatctactatctt  
atgatgtcgtgagttcgaatctcacccttagca  
1-3tRNA-Trp(cca)c[62763,62833]  
gacctgttagtttaattggtaaaatggcgcctccagagtattgatatcg  
gttcgattccggtacaggtcc

>JX962719.1 Acanthamoeba polyphaga moumouvirus, complete genome

1-1tRNA-His(gtg)[96801,96872]  
gatctgttagtttagttgtagaatacctgtctgtggaacaggagacatc  
ggttcgaatccgatacaggtca  
1-2tRNA-Cys(gca)[96877,96951]  
aggaccattagctcaattggttagagcaatcgcctgcagagcgagaggtta  
ctggttcaagtccagttatgttccta

>KF527228.1 Mimivirus terra2 genome

1-1tRNA-His(gtg)[116247,116317]  
gatccgtagttagtggtagaactactgtttgtgggacggcgacacag  
gttcgattcctgtacgggtca  
1-2tRNA-Cys(gca)[116365,116436]  
ggatcgttagctcaatggtagagcgctcgctgcagagcgataggtatc  
agttcaattctgatacgtcct  
1-3tRNA-Leu(taa)c[768570,768652]  
gcaaaggtggcggagtggtctaacgcggtagacttaagatctactatctt  
ttgatgtcgtgggttcgaatcccaccctttgca  
1-4tRNA-Leu(taa)c[960128,960210]  
gcaaaggtggcggagtggtttaacgcgctggacttaagatctagtatcat  
ttgatatcgtgggttcgaatcccaccctttgca  
1-5tRNA-Leu(caa)c[993610,993692]  
gcaaaggtggcggagtggtctaacgcggtagactcaagatctactatctt  
ttgatgtcgtgggttcgaatcccaccctttgca  
1-6tRNA-Trp(cca)c[1003497,1003567]  
gacctgttagtttaatggtaaaacggtagcctccagagtattgatactg  
gttcgattccggtataggtcc

\*Myoviridae

>AF158101.6 Enterobacteria phage T4, complete genome

1-1tRNA-Arg(tct)c[71173,71247]  
gtcccgtggtgtaatggatagcatcacgtccttctaagtttgcggtcct  
ggttcgatcccaggcgggatacca  
1-2tRNA-Met(cat)c[71960,72033]  
ggccctgtagctcaatggtagcagcagtcacctcataagggaaaggta  
ccagttcaaatctggtctgggtca  
1-3tRNA-Thr(tgt)c[72035,72110]  
gctgatttagctcagtaggtagagcacctcacttgtaatgaggatgtcgg  
cgggtcgattccgtcaatcagcacca  
1-4tRNA-Ser(tga)c[72117,72205]  
tggaggcgtggcagagtgggttaatgcaccggtcttgaaaaccggcagtc  
gctccggcgactcataggtcaaactctatcgctccgt  
1-5tRNA-Pro(tgg)c[72206,72280]  
ctccgtgtagctcagtttggttagagcgctgattgggatcaggaggtcc  
aaggttcaaatccttgatggagac  
1-6tRNA-Gly(tcc)c[72291,72364]  
gcggatatcgataatggtattacctcagactccaatctgatgatgtga  
gttcgattctcattatccgtcca  
1-7tRNA-Leu(taa)c[72370,72456]  
gcgagaatggtaaattggtaaaggcacagcacttaaaatgctgcggaat  
gatttccttgggttcgagtccttctcgacca  
1-8tRNA-Gln(ttg)c[72457,72530]  
tgggaattagccaagttgtaaggcatagcactttgactgctagatgcaa

aggttcgagtcctttattcccagc  
 >U24159.1 Bacteriophage HP1 strain HP1c1, complete genome  
 1-tRNA-Lys(ttt)[356,431]  
 gggtcgttagctcagtcggttagagcagcggacttttaacccgttggtcga  
 aggttcgaatccttcacgaccacca  
 >AF320576.1 Bacteriophage Felix 01, complete genome  
 1-tRNA-Pro(tgg)[23699,23775]  
 ctctgttagctcagcttggttagagcgttccgtttggggcggttaaggccg  
 gaggttcaagtcctccaacagagacca  
 1-2tRNA-Glu(ttc)[23783,23860]  
 gttccagtagacaaaatggtaaagtcaccactcttcaaagtggtatct  
 gagggttcaaatcccttctggaacgcca  
 1-3tRNA-Met(cat)[23952,24028]  
 tgcgggtatagagaaaggcgctctcacatgtctcattagcatggtatcgg  
 caggttcgactcctgcacccgcctcca  
 1-4tRNA-Asn(gtt)[24112,24188]  
 ggttaggaagcacataaggtatgtcggtcgcctgttaagcgaatggcac  
 agggttcgaatccctgactaaccgcca  
 1-5tRNA-Tyr(gta)[24258,24345]  
 gtgtcgttatccgtagatggtagcgggtggggactgtaaatccctgtca  
 ttgagactcggtaggttcgactcctacacggcacacca  
 1-6tRNA-Asp(gtc)[24351,24427]  
 ggctatgtagtttaactggagaaaatactcccctgtcacgggagatgatg  
 tgagttcaagtctcatcgtagccgcca  
 1-7tRNA-Lys(ttt)[24856,24931]  
 ggaagtgtagcagaatggtgatgcggcagacttttaatctgacaggcgt  
 gggttcgaatccctccacttctacca  
 1-8tRNA-Met(cat)[24936,25012]  
 ggttcagtcgcagataaggtaatgcaagggtctcataagccctatgaatg  
 tgggttcgattcccatctgaacctcca  
 1-9tRNA-Ile(gat)[25509,25584]  
 gctgtgaaagcacatatggatgtgcattcggctgataaccgaaaggcaga  
 aggttcgaatccttctcacagtacca  
 1-10tRNA-Ser(tga)[26629,26718]  
 ggtaggtagcggctaattggtagccaaactgtctgaaaacagttgccact  
 gtagagatacggtaggggttcgactccttacttaccgcc  
 1-11tRNA-Leu(tag)[26975,27052]  
 gggagattgatggttaattggtaacctatctcgcttagaacgagatgttt  
 gagggttcgaatccctgtctctacca  
 1-12tRNA-Lys(ctt)[27060,27135]  
 gcaggtgtagcaaaatgggtatgcggctgactcttaacagtaagacgat  
 gggttcaattccctccacctgtacca  
 1-13tRNA-Ala(tgc)[27142,27217]  
 tgggtcatagtttatatggttaaaattcgagtttgcaaaacttggaact

gagttcaattctcagtactccacca  
1-14tRNA-Gly(tcc)[27224,27298]  
gcatccatagtttaaacgggaaaattacagtcttccaaactgaggttgag  
ggttcgattccctctggatgctcca  
1-15tRNA-Thr(tgt)[27728,27804]  
gctgctttcgtataattggctattacacatcccttgaaggatggaaatg  
caggttcaagtcctgtgagcagcacca  
1-16tRNA-Val(tac)[27900,27974]  
actcgcttagtttataggtaaaacatcaccttacaagatgaagaaaaa  
ggttcaagtccttagtgagtacca  
1-17tRNA-Leu(caa)[27976,28053]  
gttccagtatcccaattggcagaggatgcaagctcaaacctgtattagt  
gacggttcgaatccgtcttggaaacacca  
1-18tRNA-Arg(acg)[28168,28243]  
gcaggattagttcaaatggatagagcaacagtctacgaagctgtaatatg  
gggttcgaatcccttatcctgcgcca  
1-19tRNA-Gln(ttg)[28828,28903]  
aggggattagtttacaaggttaaaacctcggctttgaaatcgaagaagt  
tggttcaattccaacatccccgcca  
1-20tRNA-Leu(taa)[28906,28984]  
gctccattactccaattggcagagaggccagacttaaaatctgtgttatg  
tatcggttcgaatccgatatggagtacca  
1-21tRNA-Gln(ctg)[28990,29065]  
agcggtagtagcataactggcaatgcagcagctctgaagctgtcctatta  
aggttcaaatccttatgccgctgcca  
1-22tRNA-His(gtg)[29097,29172]  
gtggccttatcataaatggtaatgacccatgctgtgaacatggtctatac  
gggttcaaatcccgtaggtcacccca  
1-23tRNA-Phe(gaa)[29179,29254]  
agtccaagtagcttatatggttaaagcgcgtgtctgaaaaacatgagaag  
agggttcaatcccactggactacca  
1-24tRNA-Ser(gct)[30008,30100]  
ggaagattaaccctaaaaggtaaggagcagtttgctaaactgccagtag  
ctgagaaatcggtgtaccagttcaagctggtatcttctcca  
1-25tRNA-Cys(gca)[30105,30180]  
gaatccgtgacagaaatggatatgtgcctgtctgcaaaacaggtttataa  
gggttcaagtccttcggattctcca

>AY129337.1 Mycobacteriophage Bxz1, complete genome

1-1tRNA-Ser(gct)[32863,32946]  
ggagggtgagcatctggtgatgcaggggtcctgctaaggccctacggatt  
cacaccgtgagtttcgattactcctccctccgc  
1-2tRNA-Leu(cag)[33043,33119]  
gccctgctgagcaaaactggcaaagctgccgattcagagtgcgggtcatt  
tccgggttcgactcccgggcagggtac

1-3tRNA-Leu(gag)[33239,33313]  
gtctctgtaggcaaatcgaaaagccgccatcttgaggggtggtgcgtg  
cgggttcgactcccgccagagacac  
1-4tRNA-Leu(caa)[33314,33387]  
gccgtgtaggccatctggcgagccgccagttcaagtttcggtgttgc  
gggttcgaatcccgcacgttac  
1-5tRNA-SeC(tca)[69709,69805]  
attctggcactggtggcgagcccaccggcgagcttcaagctgtcgt  
ggccggagaaccgaccggaacatcccggtcaacgcgacccagggcc  
1-6tRNA-Pro(tgg)[94073,94147]  
cggggtgtagttcagtttgaagagcgcttggttgggaccaagatgtcg  
caggttcgaatcctgtcaccccgac  
1-7tRNA-Trp(cca)[94164,94239]  
tgggtgaagccgatctggaaggcagcggtctcaaagccgtctcatagc  
gggttcgaatcccgtcacccctgcca  
1-8tRNA-Tyr(gta)[94241,94327]  
gccgcacatcccaactggtgttgggagcaggtgtaacctgtggcct  
tcgggacggtgaggttcgattcctcagtcgggtacca  
1-9tRNA-Pyl(cta)[95436,95508]  
gcaccatttgctcaatggcagagcggcggttctaaccccgtagtgccg  
gttcgattccggcatggtgcacc  
1-10tRNA-Met(cat)[95658,95732]  
agcgggtgtagagcagctaggtagctcgccgggtcataacccggaggacg  
cgtgttcgaatcacgccaccgccac  
1-11tRNA-Cys(gca)[95859,95930]  
gcgccttggcggaatggctacgtgctcggtgcaacccgagttatccc  
gttcgactccggaggggcgctc  
1-12tRNA-Glu(ctc)[95998,96069]  
gtccccatggggtagtggaacctcctggttctcagccaggcgtccga  
gttcgatcctcggtgggagtgc  
1-13tRNA-His(gtg)[96071,96144]  
gtggccgtagttcagccggtagaacgctgggtgtgatccagtcgtcga  
gggttcgagtcctccggtcaccc  
1-14tRNA-Ala(tgc)[96306,96380]  
gggcctgtagctccaattggtagagcagcatcctgcaagatgacggctg  
tcggttcgaatccgacctggtccac  
1-15tRNA-Phe(gaa)[96570,96642]  
gccgtcatagctcagttggtagagcactggcctgaaaaccagtgccga  
ggttcgagtcctcgtgtcggcac  
1-16tRNA-Val(cac)[96648,96721]  
gtccgttagctcagctggaagagcgctcggtccacaccgagaggccgc  
agggttcgatccctgcaatggacac  
1-17tRNA-Lys(ctt)[96840,96912]  
gccttcgtagctcagtggtagagctgtgcctttaagcgataggtcgtt

ggttcgaatccagccggggcac  
1-18tRNA-Glu(ttc)[96917,96993]  
ggtcgggtcggctcgtggtatggccagtcggatttcactccggacatt  
cgcggggtcaattcccgtcccgatcgc  
1-19tRNA-Gly(tcc)[97073,97145]  
gcggtgtggccgaatggctcaggcaccagattccactctggctacgca  
ggttcgattcctgtcatccgctc  
1-20tRNA-Thr(cgt)[97205,97279]  
gctgctgtagctcacctggcagagcgtcggcgtcgtatcccgaaggcatc  
cggttcgagtcggacagcagcccc  
1-21tRNA-Thr(tgt)[97280,97352]  
gcctctgtgtccagcggcacggacatccgccttgaagcggaggacccc  
cgttcgatccgggtagaggctc  
1-22tRNA-Thr(ggt)[97760,97832]  
gtcgggttagctcagtggtagagcgttcctctggtatgggaaaggccgg  
ggttcaatccccgattcagctc  
1-23tRNA-Gly(gcc)[99155,99228]  
gcgaaggtagctcagctggcagagcggcaccttgccaaggtggaggtcgc  
gggatcgtaacccgttcttcgctc  
1-24tRNA-Asp(gtc)[99232,99304]  
ggccctgtagctcagaggaagagcgcggctctgtcgaatcggaggtcgcg  
gtatcgtaatccgtcagggtcgc  
1-25tRNA-Met(cat)[99364,99436]  
gcctcactagctcattggtagagcgcctcgtcataacgtgcaggtacct  
ggttcgattccagggtgaggtac  
1-26tRNA-Ile(gat)[99442,99516]  
gcctgttagcggactggctcctccgatccaagctgataactggcgtaagc  
ggtgttcgattcaccgagcaggtac  
1-27tRNA-Arg(acg)[99610,99682]  
gcctctatggtccaacggatatgacgccggtctacggaaccggagatgcg  
tgttcgattcgcgctaggggcac  
1-28tRNA-Val(gac)[99725,99797]  
gtccgtgtagctcaggggtagagcgcctgctcgacacgcaggaggaccga  
ggttcgaaacctcgcatggacac  
1-29tRNA-Arg(cct)[99972,100045]  
gcctctgtagctcaacggacagagcaacgcggctctaacgcggtggctgg  
aggttcgaatcctctcggaggcac  
1-31tRNA-Gln(ttg)[100586,100661]  
tggggtatggtggcaatctggcagtcgcccgacttgactccggaggt  
gcaggttcgagtcctgctacccatc  
1-32tRNA-Arg(tct)[100665,100740]  
gccctttagctcagtggaagagcggcgagcttctacctcgcgggccgg  
gagttcgaatctctccagggcacca  
1-33tRNA-Gln(ctg)[127267,127341]

tgctcgttggtgtaactggcaacactacggactctgactccgtcatttta  
ggttcgaatcctaagcgagcagcca  
1-34tRNA-Asn(gtt)[127348,127423]  
tgggggtgccgtaatacaggcaaacgagcggactgttaatccgcccctgc  
aggttcgaatcctgccacccagcca

>AY375531.1 Bacteriophage 44RR2.8t, complete genome

1-1tRNA-Arg(tct)c[65379,65455]  
ggctccttagctcagctggacagagcaacgtcgttctaagtcgttggtca  
ttggttcgaatccaataggaccacca  
1-2tRNA-Met(cat)c[66424,66498]  
ggccctgtagctagacggttcaagcaggcggctcataaccgctcgtagca  
ggttcgattcctgccaggccacca  
1-3tRNA-Met(cat)c[66706,66782]  
tgcgacgtagaggagaggtcgtcctcgtcgggctcatatcccggaaatcg  
gtggttcgaatccatccgtcgcaccca  
1-4tRNA-Asp(gtc)c[66804,66877]  
ggagccatagtttatacggttaaaataatcccctgtcacgggatagcacc  
gagttcgalcctcgggtggctccgc  
1-5tRNA-Ser(gct)c[66951,67038]  
ggagaagtggatgagcggtttaaatcgttcctgctaaggaagtaaacc  
gaaaggttcgagagttcgaatctctccttctccgcca  
1-6tRNA-Ile(gat)c[67046,67121]  
agtggattagctcagtagtagagcactcgaccgataatcgagagcgcac  
tggttcgacccagtatccactacca  
1-7tRNA-Trp(cca)c[67124,67199]  
atgacattggtgtagcggtagcatgccggtctccaaaaccgtgcggcca  
gggttcgaatccttgatgtcatgcca  
1-8tRNA-Thr(tgt)c[67545,67620]  
gccgatttagctcatccggtagagcagttgtttgtaagcatcaggtggt  
ccgttcgagtcggacaatcggcacca  
1-9tRNA-Pro(tgg)c[68260,68336]  
ccgcgtgtaggctagtcaggtaggtcgtctggttgggaccagaaaatcg  
gaggttcgaatcctccacgcggacca  
1-10tRNA-Gly(tcc)c[68842,68917]  
gcgggtaagggtgttacggatacatgctagcctccaagcttgagtagac  
cggttcgataccggctacccgctcca  
1-11tRNA-His(gtg)c[68930,69004]  
gtgacggtagctcagctggtagagccccaggttgatcctggtcgtcgc  
gagttcaatcctcgtccgtcacccc  
1-12tRNA-Lys(ttt)c[69125,69200]  
gcatcgtaactcaattggcagagtagcggaccttaatccgttggttct  
gagttcgaatctcagacggtgtacca  
1-13tRNA-Tyr(gta)c[69804,69886]  
ggaacgttcgggtaatggtatccaagcggctgaacccgctcgcctctg

gcattcttggttcgagtcgaaggcgttcacca  
1-14tRNA-Asn(gtt)c[69900,69985]  
ggtgatgtggctcagaggttgagcggcgactgtaatccgcgaggaatt  
tcctctatactgggttcgagtcagtcacccacca  
1-15tRNA-Phe(gaa)c[70067,70151]  
gttgctgtgagccgagtggtcgaaggcggtccctggaaacgggacgggtt  
gaaagacctcgaaggttcgaatcctccagcaacc  
1-16tRNA-Ser(tga)c[70222,70315]  
ggaagcttggcagagtcggcttattgcactagtcctgaaaactagcgat  
cgtaggaatacgggtccatccgttcaaactggatagctccgcca  
1-17tRNA-Leu(taa)c[70506,70589]  
gggagtggtggaacggcatacacaggaggttaaacctcccgccttc  
gggattgagggttcgagtcctcctcctctacca

>AF399011.1 Pseudomonas phage phiKZ, complete genome

1-1tRNA-Thr(tgt)c[266721,266797]  
gccgctatagctcagctaggtagagcaacgcacttgtaatgcgtaggtcc  
tccgttcgattcggagtggcggcacca  
1-2tRNA-Asn(gtt)c[269558,269644]  
tggtgaagtacccgagtggcagcaggagcggactgtaatccgttggcga  
aagcccaccgtaggttcgaatcctacctaccagcca  
1-3tRNA-Asn(gtt)c[271741,271816]  
tccgtgatagctcagtcggtagagcaagtgactgttaatcactgggtccc  
tgggtcgagtcagggtcacggagcca  
1-4tRNA-Asp(gtc)c[271823,271899]  
gcgctcatagttcagttggttagaataccgcctgtcacgcgggtgtca  
gggggttcgagtccttgggcgcgcca  
1-5tRNA-Met(cat)c[272872,272948]  
gggcctatagctcagttggttagagcaggcgactcataatcgcttggtcg  
caggttcaagtctgctgggcccacca  
1-6tRNA-Pro(tgg)c[273271,273346]  
cggagtgtagcgagttggtagcgcgcctgttgggagcaggatgtcgg  
gagttcgagtcctccactccgacca  
1-7tRNA-Leu(taa)c[273356,273440]  
gcccgaatggtgaaattggtaaacacagaagacttaaatcttccggcta  
cggcttctgcggttcgaatccgacttcgggcacca

>AY266303.2 Bacteriophage Aeh1, complete genome

1-1tRNA-Met(cat)c[105608,105682]  
ggccccgtagctggagggttttagcgtcggctcataaccgcttgatgtg  
ggttcgattcccaccggggccacca  
1-2tRNA-Leu(tag)c[106157,106243]  
gcggatgtggtgaaattggtagacacagagtttagtgctcgcgctag  
tgatagcgtgtcgggttcgagtcggacctccgtacca  
1-3tRNA-Ser(gct)c[106250,106337]  
ggagaaatgacagagaggccgaacgtagcggattgctaattcgtaggccc



gcaagggtccgtgggttcgaatcccactttctcctcca  
1-4tRNA-Ser(tga)c[106694,106788]  
ggaagcgtggcagagtcggcttattgcacaagtcttgaaaacttgcggc  
gaggatccccctcgtccatccgttcgaatcggatcgttccgcca  
1-5tRNA-Gln(ttg)c[107234,107310]  
aggggattcgcctagctggcctaaggcatcggactttgactccgatcgc  
ttgattcgaattcaacatcccccgcca  
1-6tRNA-Pro(tgg)c[107564,107638]  
ctcgggttaggcaagtggatgtcgcctggttgggaccaggtcgtcgag  
tgttcgattcactcaccgagacca  
1-7tRNA-Phe(gaa)c[107775,107850]  
gggtccttagctcagtagtagcatatgattgaagatcatagtgtccc  
cagttcaattctgggagggcccacca  
1-8tRNA-His(gtg)c[107856,107931]  
gtgacggtagttcagttggtagagctccaggctgtgatcttgtagtcac  
gggttcgatccccgtccgtcaccacca  
1-9tRNA-Thr(tgt)c[108011,108085]  
gcctctatagctcagtggttagagcaactgccttgaagcagtaggtcctc  
ggttcaatcccagtgggggctcca  
1-10tRNA-Tyr(gta)c[108092,108183]  
ggatgtgctgcaatgacgggtgattgcaccagactgtaaatctggcccc  
acagggtaaacattgtaggtcgactcctaccgcatccacca  
1-11tRNA-Met(cat)c[108208,108282]  
tgcgagttggagaagtcgggtatctcgttagcctcataagctaaaggtcg  
gtggttcaaatccaccactcgcac  
1-12tRNA-Glu(ttc)c[108303,108378]  
tctccgttcgtctagtggttaggactgacactgccctttcacggcgtaacat  
ggattcgaattccatacggagaacca  
1-13tRNA-Met(cat)c[108870,108944]  
gggtcattagctcagtggttagagctgcggtttcatacgccgtcggtcggt  
agttcgaatctaccatgcaccacca  
1-14tRNA-Lys(ttt)c[109164,109240]  
gcgctgttagctcaatggtttagagcaatcggctttaaccgataggttc  
cgggttcgagtcggggcggtacca  
1-15tRNA-Trp(cca)c[109247,109320]  
aggggattagcaaaatggttatgcggcggttccaaatccgttgacgtga  
gttcgattcttacatcccctgcca  
1-16tRNA-Cys(gca)c[110265,110339]  
gtccggtagccaagcggtaaggcaagtattgcaaatcacttttacgtc  
tgttcaaatcagatccggtactcca  
1-17tRNA-Gly(tcc)c[110347,110420]  
gcctcattggtgtagtggtcacataccgtcctccaagtcgtagtgcgg  
gttcgattcccgaatgaggctcca  
1-18tRNA-Ala(tgc)c[110494,110569]

ggggaaatagctcagatgggagagcactagccttgcaagctgggggtcgt  
gggttcgagtcgccattttctccacca  
1-19tRNA-Asp(gtc)c[110939,111013]  
gggtcattagatataatggctattattcgtgactgtctatcacaagatac  
ggttcgattcccgtatgcaccgcca  
1-20tRNA-Ile(gat)c[111020,111094]  
agtccttagctcagaggtagagcgccgtgctgataacgcggatgtggat  
ggttcgataccattcgggactacca  
1-21tRNA-Asn(gtt)c[111229,111311]  
ggaggtgtggctcaaaggtgagcggcagactgttaatctgcgggtaata  
accctatgttggttcgagtcgaacctctccgc  
1-22tRNA-Leu(taa)c[114632,114720]  
gcgagtgtagccgaatcggtataggcagcagacttaaaattgccgggtgc  
taacgcgccatgtgagttcgatcctcaccactcgacca  
1-23tRNA-Leu(caa)c[114726,114810]  
gggagtagctggaactggcatacaggcgaagctcaaacctgttgacaa  
tagtcgtgtgggttcgaatcccactactcccacca

>AY283928.2 Bacteriophage KVP40, complete genome

1-1tRNA-Ser(gct)c[173137,173225]  
ggagatatggctaaaggtatgacagcaccctgctaaggtgtcggacgtt  
aatagcgttctctgggttcgattcccagtatctccgcca  
1-2tRNA-Leu(caa)c[173666,173742]  
gcccaactagtcgaattggcagaggcgctagttcaaacactagatgac  
cgagttcgaatctcgggttgggcacca  
1-3tRNA-Leu(taa)c[173859,173935]  
gcgcacgtgggtccaattggcagaggcatgaggcttaaaatctcagggatg  
cggttcgaatccgccgtgcgtacca  
1-4tRNA-Cys(gca)c[173938,174011]  
gcccgaatcgataatggaagtatgagggttgcgaatcccggtcaga  
gttcgattctctgttcgggtcca  
1-5tRNA-His(gtg)c[174115,174191]  
gtggcagtggtgaagtggaaataccccgggttgtattccggaagatg  
cgggttcgatccccgtctgtcacccca  
1-6tRNA-Val(tac)c[174509,174582]  
ggtcccttagtataatggcagtagctctctttacacagagaagaagt  
gctcgattccactaggactacca  
1-7tRNA-Gly(tcc)c[174588,174661]  
gcgggtatgatgaatggtagcatgacgtcctccaagtcgttcgtctcg  
gttcgagtcggttaccgctcca  
1-8tRNA-Met(cat)c[174849,174924]  
ggagatgtagctcaagtggtagagcaatggtctcataagccattagatcc  
gatttcgagtatcggtgtctccacca  
1-9tRNA-Arg(tct)c[175429,175504]  
gtcctcatagctcaattggaagagcaacgaccttctaagtcgtgggtgt

gggttcgaatccctctgggatgccca  
1-10tRNA-Thr(tgt)c[175901,175976]  
gccctgatagcacaattggcagtcagctcacttgtaatgagcaggttcg  
cggttcaaatccgtgtcagggcacca  
1-11tRNA-Gln(ttg)c[176105,176178]  
aggggattgatgtaaaggcagcatagctgactttgactcacgcagtagccg  
gttcgaatccgttatcccctgccca  
1-12tRNA-Asp(gtc)c[176198,176273]  
ggagccgaggtgtaagtggttgcatgtctccctgtcacggagaaggtagc  
gggttcgaaaccgtcggttccgccca  
1-13tRNA-Asn(gtt)c[176496,176571]  
gccttattaactcagtcggtagagtgtctggctgttaaccagagagtcgt  
tggttcgagtcacaataaggcgcca  
1-14tRNA-Asn(gtt)c[176578,176652]  
gggtgtgtagctcagaggcagagcagacggctgttaaccgtcaggtcgag  
atttcgaaattctccacgcccgccca  
1-15tRNA-Trp(cca)c[176936,177009]  
agggacatgatgtaacggcagcatgacggattcaaaccgttcgttaga  
gttcgaatctctatgtccctgccca  
1-16tRNA-Ile(gat)c[177016,177089]  
agctccatagtttaacggtaaaacacgcgaccgataatcgacgttgaca  
gttcgagctgtctggggctacca  
1-17tRNA-Ser(tga)c[177154,177239]  
gaaagattctggtagcggcaacggcttgaaaaccgtcggtcaccggga  
ggtagtgtaggttcgaatccctagtttccgccca  
1-18tRNA-Met(cat)c[177260,177335]  
tgcgagttagagttctggtagaactcactagctcataagctagtttagt  
cagttcgattctggcactcgctacca  
1-19tRNA-Tyr(gta)c[177438,177523]  
ggagcgtlaagcccgaagtgccgcagcggactgtaaatccgtgtcccgt  
atgggaagagaggttcgattcctctacgtccacca  
1-20tRNA-Glu(ttc)c[177530,177603]  
gctcgattcgactatcggttaggtcacttcccttcaaggaagtaggacgg  
gttcgactcccgtatcgagtacca  
1-21tRNA-Lys(ttt)c[177667,177743]  
gcgtcggtagctcatggaagagcaggagcttttaactctcaggtgt  
ctggttcgagtcaggcggtcggtacca  
1-22tRNA-Lys(ttt)c[177755,177829]  
gggtcgttcgtataacggtagtacatctggcttttaaccagaacggtag  
agttcgaatctcttcgaccaccca  
1-23tRNA-Phe(gaa)c[177836,177910]  
gcacccttagcttatcaggaaaagcggcggttgaagtcgagtcgctc  
gggttcgattccgagggggtgcacca  
1-24tRNA-Leu(tag)c[177912,177989]

gcgcaagtagcccaatctggcagaggcactggtcttagaaaccagaagtt  
 aagagttcgaatctcttcttgctacca  
 1-25tRNA-Arg(acg)c[178432,178507]  
 gccctactagctcaattggaagagcagcgtcctacgaaggcgaggttag  
 aagttcgaatctctgtgggtgcca  
 1-26tRNA-Pro(tgg)c[178515,178591]  
 ccgtgactagctcaatctggtagagtactccgttggggcggaagtta  
 agcgttcgaatcgctgtcacggacca  
 1-27tRNA-Pro(tgg)c[178601,178674]  
 cgggacgtggcgtaaaggtagcgttcgcttgggagcatgtggaaga  
 gttcgagtctcttcgtcccgacca  
 1-28tRNA-Met(cat)c[180509,180585]  
 agccccttagctgaacggtagtagcagacgactcataatcgtcaggttc  
 tcggttcgaatccgagaggggctacca  
 >AX059140.1 Sequence 1 from Patent WO0075335  
 1-1tRNA-Arg(tct)[37706,37780]  
 gcgcctgtagctcaaccgaaagagcaccagccttctaagctggtggttg  
 tgggttcgagtcaccggcgctc  
 >AF234172.1 Enterobacteria phage P1 mod749::IS5 c1.100 mutant, complete genome  
 1-1tRNA-Asn(gtt)[69348,69423]  
 gatggttagctcagcggtagagcggtagctgtaataacgggtcga  
 tggttcaaatccatccaccatcgcca  
 1-2tRNA-Thr(tgt)[69426,69501]  
 gccggttagctcagttggttagagcgctgccttgtaagcaggatgtcag  
 cggttcgagtcggttaatcggcacca  
 1-3tRNA-Met(cat)[70933,71008]  
 ggcccttagctcagtggttagagctggcgactcataatgcacggtcac  
 cggttcaagtcggtaggggcca  
 >AY368235.2 Burkholderia cepacia phage Bcep43, complete genome  
 1-1tRNA-Leu(taa)[17806,17892]  
 gccaaagtggtggaacgtagacagcggacttaaatccgtcgcgcca  
 tcggcgctgccagttcgaatctggccctggcacca  
 >AF543311.2 Burkholderia cepacia phage Bcep781, complete genome  
 1-1tRNA-Ser(gct)[17815,17906]  
 ggagacgtggctgagtggtcgaaagcgctcccctgctaagggaacgcctg  
 gagtaatctgggtcgagggtcgaatccctccgtctccgcca  
 >AY682195.1 Lactobacillus plantarum bacteriophage LP65, complete genome  
 1-1tRNA-Gly(tcc)c[49688,49760]  
 gctcccctagttaattggctaacacgctagattccaatctagtaatgc  
 cggttcaaatccggtgggagct  
 1-2tRNA-Thr(tgt)c[49777,49847]  
 gccttgtagttcaacggtagaactcctgtcttgtaaacagggtatttca  
 gtccaactctggaacgaggca  
 1-3tRNA-Trp(cca)c[49854,49928]

tatcagagtaagcttaactggcaaactgctggactccaaatccggacttc  
taggttcgaatcctagctttgatgt

1-4tRNA-Pro(tgg)c[50751,50824]

caggatatagtcgaatttggttagagcgctagttggggctaggatatta  
taggttcaaactcattatcctga

1-5tRNA-Phe(gaa)c[51456,51529]

gtgtctgtagctcagctaggtagagcatcgttgaatccacagggtcgc  
taggttcaaaccctactgggcaaa

1-6tRNA-Leu(caa)c[51683,51757]

ggcctagtattccaattggcagagaagttagactcaaatctatacagtg  
taggttcgattcctacctaggccac

1-7tRNA-Leu(tag)c[51767,51841]

tgctctcgtaatccaacggcagagatagtggtcttagaagccatccagtg  
tgagttcgaatctcaccgagagcat

1-8tRNA-Leu(taa)c[51952,52026]

tgctctctaatccaacggcagagataatagactaaaatctataaagt  
taggttcgaatcctacagagagcat

1-9tRNA-Pro(tgg)c[52591,52668]

aatatagtatagctcaggagacagagcgctagtagggactaggtacta  
tcgctggttaaagcccagcactataatt

1-10tRNA-Asn(gtt)c[52802,52875]

ttgctcagtagttcagcggtagaataggacactgttaatgtcaaggtcgc  
tgggtcgatcccagcctgagcagt

1-11tRNA-Ser(gct)c[52976,53065]

tggaaagttgacagagtgggtgattgtggctccctgctaaggagttaac  
gtgataagcgattcaggggtcgaatcccttactttccat

1-12tRNA-Ile(tat)c[53204,53277]

tactcgtatagctcagaggcagagcattcaactataattgaggggtcgg  
tgggtcgaaccacctacgagtat

1-13tRNA-Arg(cct)c[53541,53613]

gtgctattagtctagttggataaaacatctttcctaaattgaagtcac  
cagttcgaatctgggatagcaca

1-14tRNA-Arg(tct)c[53992,54067]

gcgccccttagctcaactggatagagcaactgacttctaatcagtaggtt  
gtccggatcgtacccgacaggacgca

>KF766114.1 Staphylococcus phage K, complete genome

1-1tRNA-Met(cat)c[14229,14300]

ggactcttagcttaaaggtaaagccaaccgctcataacggttgactgta  
ggttcgaatcctgcagagtcca

1-2tRNA-Trp(cca)c[37448,37519]

acacccttagtataattagtagtacaagggtctccaaacccttagtctt  
tgtgcaaatcaaagagggtgtg

1-3tRNA-Phe(gaa)c[37526,37598]

ggtttcttagctcagatggtagagcactagattgaagctcaggtgtcat

tggttcaatccaatagaacca  
 1-4tRNA-Asp(gtc)[37604,37679]  
 tggctcattggtgtaactggttaacacactgccctgtcacggcagagagt  
 acgagttcagtcctcgatgggtcgt  
 >AJ298298.1 Bacteriophage P27 complete genome  
 1-1tRNA-Met(cat)[17158,17233]  
 ggcccttagctaagtggtagagcgagcgactcataatcgccaggtcgc  
 tggttcaatccagcaaggccacca  
 1-2tRNA-Arg(tct)[17335,17411]  
 gcgttgtagctcagtcggacagagcaattgccttctaagcaatcggtca  
 ctggttcgaatccagtacaacgcgcca  
 >AJ630128.1 Bacteriophage S-PM2 complete genome  
 1-1tRNA-Ser(tga)[102852,102939]  
 ggaggggcaatccgattggtgacggaacctgtctgaaaacagttgaggt  
 gttaaagcccttgggagttcgactctccctccctccgc  
 1-2tRNA-Arg(tct)[118243,118318]  
 tgccctcagtagctcagtggaatagagcaaccgccttctaagcggtcggtc  
 gttggttcgagtcgaacctgaggcgt  
 1-3tRNA-Lys(ttt)[118652,118726]  
 tgggtctgtaactcagttggtagtagtcgggcttttaacctgtaagtgc  
 tcggttcgaacccgaccagacccat  
 1-4tRNA-Tyr(gta)[118765,118848]  
 gggaggatttccgagtggttaaaggaatctgactgtaaatcagacggctc  
 tgccttcgcaggttcgaatcctgctcctcccacc  
 1-5tRNA-Asp(gtc)[118850,118925]  
 tggccattagtgtagaggcttatcacgccacctgtcacggtggagatc  
 acgggttcgaatcccgtatgggtcgt  
 1-6tRNA-Glu(ttc)[118982,119056]  
 gttcctatcgactagcggtaggtcaccaccctttcaagtggttagcacg  
 gggttcgaatccgtaggaatacca  
 1-7tRNA-Ile(gat)[119058,119131]  
 ggaacatagcttagttggtaaagcattcgactgataatcgaaagaccac  
 tgggttcgagtcagttgtttccac  
 1-8tRNA-Ser(gct)[119134,119224]  
 ggaagtgtggcagagaggtctaatacagtggttgctaatccgccgatgt  
 ctttataggcatccgttggttcgaatccaaccacttccgcc  
 1-9tRNA-Ser(gga)[119226,119312]  
 tggagaattgtccgagaggcttatggtgcaaacttggaagtttgtgtgg  
 gtaaaaccaccagaggttcgaatcctctatttccgt  
 1-10tRNA-Met(cat)[119315,119386]  
 ggcagtgtagttcagtggtagaacaagagattcataccctctatgtcgg  
 agttcaattctaccactgcct  
 1-11tRNA-His(gtg)[119388,119461]  
 gtgtcgtagcctaattggaaggcaggagattgtggttctccctatgagg

gttcgattccctcacggcacccca  
 1-12tRNA-Gln(ttg)[119463,119537]  
 tctgaggtcgccaagtggtaaggcagcgggtttgggtcccgcattcgtg  
 ggttcgaatcctactctcagaacca  
 1-13tRNA-Trp(cca)[119538,119611]  
 gtgggttggtctaagtgaagatgcaggtctccaaaacctgcgatggg  
 ggttcaaatccctcaccttcgcc  
 1-14tRNA-Arg(acg)[119612,119685]  
 gctctcttagctcagtggaaacagagcgttggctacgaacaaaaggtca  
 caggttcaaatcctgtagggggct  
 1-15tRNA-Val(tac)[119727,119798]  
 gggcgattaactcagcggtagagttcttgccttacaagcaagcagtcact  
 ggttcgaatccagtatcgcca  
 1-16tRNA-Pro(tgg)[120240,120313]  
 cggggtgtagctcagttggttagagcactcgcttgggagcgagtggccg  
 taggttcgaatcctatcacccga  
 1-17tRNA-Gly(tcc)[123000,123071]  
 gcgggtgtagttcagtggtagaacgctatcctccaagtagatgctgc  
 ggttcgagtcgatcacccgct  
 1-18tRNA-Ile(tat)[163382,163456]  
 gggactattgcttataggtaaagccctctgcttataacggagtgaaccg  
 agttcgagtcctcgtagtcctacca  
 1-19tRNA-Met(cat)[163460,163533]  
 gctggttagctatctggtgaaagcaccgactcataatcggtacaggc  
 gatttcgatcctcgcaaccagcac  
 1-20tRNA-Leu(taa)[163577,163662]  
 tggggacatggtggaattggtagacacaccagactaaaaatctgttgagc  
 gtatgctcgtgggggttcaactccccctgtccctat  
 1-21tRNA-Thr(tgt)[164474,164547]  
 gcctgagtagctcagttggatagagcaacgctttgtaaagcgtaggtcg  
 tcggttcgagtcggaccttgggct  
 1-23tRNA-Ala(tgc)[164733,164806]  
 ggggaattagctcagttggttagtagcgttgccttgcaagcaaaatgtca  
 ggagttcgagtcctctatttcca  
 1-24tRNA-Met(cat)[164824,164900]  
 cgcgggatggaacagtctggtagttcagcgggtctcataagccgcaggtcg  
 tgggttcaaatccactcccgtccca  
 1-25tRNA-Asn(gtt)[165144,165218]  
 ttcccttagctcaattggcagagtaggtgactgttaatcacttgggtc  
 ctggttcgagtcaggtgggggagt  
 1-26tRNA-Leu(tag)[165220,165302]  
 gcccaagtggcgggaattggtagacgcgtgggttaggttccagtgaatt  
 aattcgtggaggttcaagtcctctcttgggcac

>AY303349.1 Enterobacteria phage RB69, complete genome

1-tRNA-Arg(tct)c[74783,74861]  
 cgaggcatagctcaattgtatagagcaacggggacttctaaccgtaggt  
 tgaaggttagaatccttctgtctcgacca  
 1-2tRNA-Met(cat)c[74868,74941]  
 ggccctgtagctcaacggtagcagcagtcacctcataagggaaggtta  
 ccagttcgaatctggctcgggtca  
 >AY954970.1 Staphylococcus phage Twort, complete genome  
 1-tRNA-Met(cat)c[107491,107564]  
 tggactcttagcttaatggtaaagcaaaccgctcataagcgttggagtg  
 aggttcaatccctacagagtcct  
 >AY954969.1 Bacteriophage G1, complete genome  
 1-tRNA-Met(cat)c[110652,110723]  
 ggactcttagcttaaaggtaaagccaaccgctcataacggttgactgta  
 ggttcgaatcctgcagagtcga  
 1-2tRNA-Trp(cca)c[133870,133941]  
 acacccttagtataattagtagtacaagggtctccaaacccttagtctt  
 tgtgcaaatcaaagagggtgtg  
 1-3tRNA-Phe(gaa)c[133948,134020]  
 ggttcttagctcagatggtagagcactagattgaagctctaggtgtcat  
 tggttcaaatccaatagaaacca  
 1-4tRNA-Asp(gtc)c[134026,134101]  
 tggctcattggtgtaactggttaacacactgccctgtcacggcagagagt  
 acgagttcgagtcctgtagggctgt  
 >AY939844.2 Prochlorococcus phage P-SSM2, complete genome  
 1-tRNA-Asn(gtt)[162082,162169]  
 ttgtgaggtgacgaaattggtaaactgtcagtcgtttaactgatgttc  
 ctggcgggacttgaaggttcgactccttcctcacagt  
 >AY962392.1 Aeromonas phage 31, complete genome  
 1-tRNA-Arg(tct)c[65028,65104]  
 ggtctcttagctcagctggacagagcaacgtcgttctaagtcgttgggtca  
 ttggttcgaatccaatagggaccacca  
 1-2tRNA-Met(cat)c[66073,66147]  
 ggccctgtagctagacggttcaagcaggcggctcataaccgctcgtagca  
 ggttcgattcctgccagggccacca  
 1-3tRNA-Met(cat)c[66354,66430]  
 tgcgacgtagaggagaggtcgtcctcgtcgggctcatatcccggaaatcg  
 gtggttcgaatccatccgtcgcatcca  
 1-4tRNA-Asp(gtc)c[66452,66525]  
 ggagccatagttatcacggttaaaataatcccctgtcacgggatagcacc  
 gagttcgatcctcgttggctccgc  
 1-5tRNA-Ser(gct)c[66599,66686]  
 ggagaagtggatgagcgtttaaatcgcttcctgctaaggaagtaaacc  
 gaaaggttcgagagttcgaatctctccttctccgcca  
 1-6tRNA-Ile(gat)c[66694,66769]



agtggattagctcagtaggtagagcactcgaccgataatcgagagcgac  
tggttcgacccagtatccactacca  
1-7tRNA-Thr(tgt)c[67198,67273]  
gccgatttagctcatccgtagagcagttgtttgtaagcatcaggtggt  
ccgttcgagtcggacaatcggcacca  
1-8tRNA-Pro(tgg)c[67913,67989]  
ccgcgttaggctagtcaggtaggtcgtctggtttgggaccagaaagtcg  
gaggttcgaatccttccacgcggacca  
1-9tRNA-Gly(tcc)c[68496,68571]  
cggggtaaggtgttacggatacatgctagcctccaagcttgagtagac  
cggttcgataccggctacccgctcca  
1-10tRNA-His(gtg)c[68584,68658]  
gtgacggtagctcagctggtagagccccaggttgatcctggtcgtcgc  
gagttcaatcctcgtccgtcacccc  
1-11tRNA-Lys(ttt)c[68950,69025]  
gcgccgctagcttagttgtagagcatccggcttttaacgggagggtcga  
tggttcgaatccatcgcggcgcacca  
1-12tRNA-Tyr(gta)c[69083,69165]  
ggaacgttcgggtaatggatatccaagcggctgaacccgctcgcctctg  
gcattcttggttcgagtccaaggcgttcacca  
1-13tRNA-Asn(gtt)c[69661,69746]  
ggtgatgtggctcagaggtgagcggcgactgtaatccgcgaggaatt  
tcctctatactggttcgagtcagtcacccgcca  
1-14tRNA-Phe(gaa)c[69828,69912]  
gttgctgtgagccgagtggtgaaggcgtcctctggaaacgggacgggtt  
gaaagacctcgaaggtcgaatccttccagcaacc  
1-15tRNA-Ser(tga)c[69983,70076]  
ggaagcttggcagagctcggctattgcactagtcctgaaaactagcgat  
cgtaggaatacggccatccgttcaaactggatagcttccgcca  
1-16tRNA-Leu(taa)c[70267,70350]  
gggagtggtggaatggtatacactggagactaaaaatccccgccttc  
gggattgaggggttcgagtcctcctcctctacca

>AY967407.1 Enterobacteria phage RB43, complete genome

1-1tRNA-Met(cat)[50172,50248]  
ggcccttttagctcaattggtagagcgaacccctcataagggtgtggttc  
cggttcgagtcacggaagggccacca

>AJ697969.1 Pseudomonas phage phiEL complete genome

1-1tRNA-Thr(cgt)[102946,103021]  
tccgtgatactcagtaggtagagcaactgttcgtaacagtaggtccc  
gggttcgaaccctggtcacggaacca

>DQ320509.1 Lactobacillus phage KC5a, complete genome

1-1tRNA-Gln(ttg)[12499,12573]  
taggactatagccaaattggttaaggcatcaggtttgatcctgtgtattg  
ttggttcgagcccagctagtcctat

1-2tRNA-Tyr(gta)[13163,13246]

tagcaacttagttcaatgggagaacaagcgtgtacagttaacaatgtg  
cttgagaaggtggttcgattccatcagttgctgt

>DQ529280.1 *Aeromonas salmonicida* bacteriophage 25, complete genome

1-1tRNA-Arg(tct)c[61945,62020]

tggcccttagctcagcaggatagagcagcaaccttctaagtcgctggcc  
atcggccaatcccataggactaccc

1-2tRNA-Met(cat)c[62593,62668]

ggccctctgcacagctctggaatgtgtccagctcataactgggtaaggc  
gggttagattcccgcgaggccacca

1-3tRNA-Met(cat)c[62876,62952]

tgcgacgtagaggagaggtcgtcctcgtcgggctcatatcccgaataca  
acggttcgaatccgttcgtcgcatcca

1-4tRNA-Asp(gtc)c[62974,63047]

ggagccatagtttatacggttaaaataatcccctgtcacgggatagcacc  
gagttcgatcctcgggtggctccgc

1-5tRNA-Ser(gct)c[63125,63212]

ggagaagtggatgagcggctgaaatcgcttccctgctaaggaagtaaac  
gaaaggttcgagagttcgaatctctccttccgcca

1-6tRNA-Ile(gat)c[63220,63295]

agttggattagctcagtaggtagcactcgaccgataatcgagagcgc  
tggttcgatcccaatatccactacca

1-7tRNA-Trp(cca)c[63298,63373]

atgacattggtgttagcggtagcatgccggtcctcaaaaccgtgcggcca  
gggttcgaatccttgatgtcatgcca

1-8tRNA-Thr(tgt)c[63738,63813]

gccaattagcacagcggtaggtgcaacgtattgtaatacgtaggtcgt  
cagttcgaatctgacaattggctcca

1-9tRNA-Pro(tgg)c[64074,64152]

ccgtgtgtaggctagtcaggttaggtcgtctggttggggccagaaagtc  
gaaggttcgaatccctccacacggacca

1-10tRNA-Gly(tcc)c[64397,64472]

gcgaatatagctcagttggttagagcttctgcctccaagcagaatgcat  
cggttcgatcccgaattatcgctcca

1-11tRNA-Asn(gtt)c[64600,64682]

ggtgatgtagcataacgccatgcggcggctgtaaccggcgaggaaac  
tctacgttggttcgactccaaccatcacggcca

1-12tRNA-Ser(tga)c[64851,64944]

ggaagattggcccagttggtttaaggcaccggcttgaaaaccggcgat  
cgtaggaatacgggtccatccgttcgaatcgatatcttcctcca

1-13tRNA-Leu(taa)c[65136,65220]

gcaagtatggtggaattggtatacactggaggctaaaacctccgcctt  
cgggattgtgggttcgagtcctactactgcacca

>DQ997624.1 *Thermus thermophilus* phage YS40, complete genome

1-tRNA-Thr(tgt)[52068,52143]  
ggcctcgtagctcaacaggaagagcactcgccttgtaagcggggggtgt  
gggttcaatcccaccgggcctcca  
1-2tRNA-Met(cat)c[120023,120099]  
ggggcgtagctcaagcggtagagcggcggctcataaccgattggttg  
taggttcgagtcctacacgccccacca  
1-3tRNA-Arg(tct)c[120112,120188]  
gaggggtagctcaacaggacagagcaagggaatttctaaccctaggttg  
caggttcaagtcctgcacccctcgcca

>DQ398053.1 Mycobacteriophage Catera, complete genome

1-tRNA-Ser(gct)[30008,30091]  
ggagggtgagcatctggtgatgcaggggtcctgctaaggccctacggatt  
cacaccgtgagtttcgattactcctccctccgc  
1-2tRNA-Leu(cag)[30188,30264]  
gccctgctgagcaactggcaaagctgccgattcagagtgcgggtcatt  
tccgggttcgactcccgggcagggtac  
1-3tRNA-Leu(gag)[30384,30458]  
gtctctgtaggcaaatcgaaaagccgcatctgagggggtggtgcgtg  
cgggttcgactcccgcagagacac  
1-4tRNA-Leu(caa)[30459,30532]  
gccgtggtaggccatctggcgagccgagttcaagttcgggtgttgc  
gggttcgaatcccgcacgggtac  
1-5tRNA-SeC(tca)[66782,66878]  
attctggcactggtggcgagcccaccggcgagcttcaagctgtcgt  
ggccggagaaccgaccggaacatcccgttcaacgcgaccaggggcc  
1-6tRNA-Pro(tgg)[90077,90151]  
cggggtgtagttcagtttgaagagcgttggttgggaccaagatgtcg  
caggttcgaatcctgtcaccgccac  
1-7tRNA-Trp(cca)[90166,90236]  
gggtctgtgcacagggtgcccgcaggtctcaaagccgaaggcgggggtt  
cgattccctccaggcctgcca  
1-8tRNA-Tyr(gta)[90238,90324]  
cccgatcatgcccaactggtgttgggagcaggctgtaaatctgtggcct  
tcgggacggtgaggttcgattcctcagtcgggacca  
1-9tRNA-Pyl(cta)[91378,91451]  
tgcgagatcgtgcacggcgactaggagcttctaaccctccgactcgcgg  
gttcgactcccgcattctgcacccc  
1-10tRNA-Met(cat)[91599,91673]  
agcggtagagcagctaggtagctcggggctcatgaccggaggacg  
cgtgttcgattcacgccaccgccac  
1-11tRNA-Cys(gca)[91800,91871]  
gcgcctttggcggaatggctacgtgctcggctgaacccgagttatcccg  
gttcgactccgggaggcgctc  
1-12tRNA-Glu(ctc)[91876,91950]

gggccgttggagtagatggacatctcgccaccctctcaagtgagatca  
cgggttcaagtcccgtacggactgc  
1-13tRNA-His(gtg)[91952,92025]  
gtggccgtagttcagccggtagaacgctgggttgtgatccagtcgtcga  
gggttcgagtcctccggtcaccc  
1-14tRNA-Ala(tgc)[92187,92261]  
gggcctgtagctccaattggtagagcagcatccttgcaagatgacggctg  
tcggttcgaatccgacctggccac  
1-15tRNA-Phe(gaa)[92451,92523]  
gccgtcatagctcagttggtagagcaccggcctgaaaacccggtggccga  
gggttcgagtcctcgtgtcggcac  
1-16tRNA-Val(cac)[92529,92602]  
gtccgtttagctcagctggaagagcgctcggccacacccgagaggccgc  
aggttcgatccctgcaatggacac  
1-17tRNA-Lys(ctt)[92721,92793]  
gccttcgtagctcagtggtagagctgtcgcccttaagcgataggctgtt  
ggttcaaattccagccgggggcac  
1-18tRNA-Glu(ttc)[92797,92871]  
ggtcgggtggtctgttggcaggccggtcggattttcactccggacattcg  
cgggttcaattcccgtcccgatcgc  
1-19tRNA-Gly(tcc)[92951,93023]  
gcgggtgtggccgaatggctcaggcaccagattccactctggctacga  
ggttcgattcctgtcatccgctc  
1-20tRNA-Thr(cgt)[93083,93156]  
gtcgtgtagctcacctggcagagcgctggcgctcgtatcccgaaggcatc  
cgggttcgagtcggacagcagctc  
1-21tRNA-Thr(tgt)[93165,93238]  
gccctttagctcagtggcagagcaccgaccttgtaagtcgggttgtccc  
gggttcgattcctggtaggggctc  
1-22tRNA-Thr(ggt)[93747,93821]  
gctactgaggcccatatggatggcgcgcccatggttaagccgaggtaga  
tgggttcaagtcctccagtagctc  
1-23tRNA-Gly(gcc)[95144,95217]  
gcgaaggtagctcagctggcagagcgccaccttgccaagtgagggtcgc  
gggatcgtaaccggttcttcgctc  
1-24tRNA-Asp(gtc)[95221,95293]  
ggccctgtagctcagaggaagagcgccgatctgtcgaatcgaggtcgcg  
gtatcgtaatccgtcagggtcgc  
1-25tRNA-Met(cat)[95353,95425]  
gcctcactagctcattggtagagccgctcgtcataacgtgcaggtacct  
ggttcgattccagggtgaggtac  
1-26tRNA-Ile(gat)[95431,95505]  
gcctgttagcggactggtcgtccgatccaagctgataactggcgtaagc  
ggtgttcgattaccgagcaggtac

1-27tRNA-Arg(acg)[95599,95671]  
gcctctatggtccaacggatatgacccggtctacggaaccggagatgcg  
tggtcgattcgcgctaggggcac  
1-28tRNA-Val(gac)[95714,95786]  
gtccgtgtagctcaggggtagagcgctgctcgacacgcaggaggaccga  
ggttcgaaacctcgcatggacac  
1-29tRNA-Arg(cct)[95960,96033]  
gcctctgtagctcaacggacagagcaacgcggtcctaacgcggtggctgg  
aggttcgaatcctctcggaggcac  
1-31tRNA-Gln(ttg)[96574,96649]  
tggggtatggtggcaatctggcagtcgcccggaacttgactccggaggt  
gcaggttcgagtcctgctaccccatc  
1-32tRNA-Arg(tct)[96653,96726]  
gccctttagctcagtgagacagagcggcgagcttctacctcggggccgg  
gagttcgaatcctctccaggggcac  
1-33tRNA-Lys(ttt)[96794,96870]  
gggccggtatcttagtctggtcaaagaagtggaactttaatccgcgcgc  
gtgggttcgaatccaccggccacc  
1-34tRNA-Gln(ctg)[124401,124475]  
tgctcgttggtgtaactggcaacactacggactctgactccgtcattta  
ggttcgaatcctaagcgagcagcca  
1-35tRNA-Asn(gtt)[124482,124557]  
tggggtgtccgttaatcaggcaaacgagcggactgttaatccgcccctgc  
aggttcgaatcctgccacccagcca

>DQ149023.2 Synechococcus cyanophage syn9, complete genome

1-1tRNA-Val(tac)[15973,16044]  
gggcgaatagctcagcggtagagctactcgtttacaccgagtcggtcggg  
ggttcgatcccctcttcgcca  
1-2tRNA-Leu(taa)[19727,19813]  
tgggagcgtggcggaaatcggtagacgaccagacttaaaatctgttgaga  
attaatctcgtgggggtcaattcccccgctcctat  
1-3tRNA-Thr(tgt)[20001,20075]  
gccaaactagctcagctggatagagcaacggtttgtaaaccgtaggtca  
acggttcaagtcggtgttggctc  
1-4tRNA-Ala(tgc)[20078,20150]  
ggggaattagctcagttggtagagcgctgcttgcaagcaggatgtcag  
cggttcgagtcgctattctcca  
1-5tRNA-Asn(gtt)[20225,20298]  
ttcctcttagctcagcggtagagcgattgactgttaatcaattggtccc  
tggttcgatcccaggaaggggagt  
1-6tRNA-Arg(tct)[162261,162336]  
tgggtcagtagctcagctggatagagcaactgccttctaagcagtcggtc  
acaggttcgaatcctgtctgaccgt

>DQ904452.1 Bacteriophage RB32, complete genome

1-tRNA-Arg(tct)c[67482,67558]  
cggggcatagctcaattgtatagagcaacggacttctaataccgtaggttg  
aaggtagaatccttctgtctcgacca  
1-2tRNA-Met(cat)c[68269,68340]  
ggcctgtagctggaaggttcaagcaagcgactcataatcgccagatggt  
ggttcaattccaccaggcca  
1-3tRNA-Thr(tgt)c[68342,68417]  
gctgatttagctcagtaggtagagcaactcacttgaatgagaagtcgg  
cggttcgattccgtcaatcagacca  
1-4tRNA-Ser(tga)c[68419,68507]  
tggagcgtggcagagtggtttaatgcaccggcttgaaaaccggcagtc  
gctccggcgactcataggttcaaatcctatcgctccgt  
1-5tRNA-Pro(tgg)c[68508,68582]  
ctccgttagctcagtttgtagagcgctgattgggatcaggaggtcc  
aaggttcaaatccttgtatggagac  
1-6tRNA-Gly(tcc)c[68593,68666]  
gcggatatcgataatggcattacctcagactccaatctgatgatgtga  
gttcgattctcattatccgctcca  
1-7tRNA-Leu(taa)c[68672,68758]  
gcgagaatggtaaattggtaaaggcacagcacttaaatctgcggaat  
gatttccttgggttcgagtccttctcgacca  
1-8tRNA-Gln(ttg)c[68759,68832]  
tgggaattagccaagttgtaaggcatagcactttagctgtagatgcaa  
aggttcgagtccttattcccagc

>AB231700.1 Microcystis phage Ma-LMM01 DNA, complete genome

1-tRNA-Met(cat)c[34160,34232]  
gcaggattggccgataggtggaggcaccgtcctcataagacggcttagag  
cggttcgattccgctatcctgca  
1-2tRNA-Tyr(gta)c[145179,145261]  
gggttagtggccgagtagtgaaggcgacagactgaaatctgtagtagta  
attccacgtggtgcaaatccagcctaaccac

>EF583821.1 Bacillus phage 0305phi8-36, complete genome

1-tRNA-Val(aac)c[183119,183194]  
tgtcatcgtagcttaataggtaaagcgtgacctaacaatgtcagagaat  
ggggttcgaaaccttacatgatgacc

>DQ003638.2 Listeria phage A511, complete genome

1-tRNA-Met(cat)c[25835,25908]  
ttgtcccgtagctagaaggtcgagcaaggagctcataactcctcggtttg  
ggttcgattcccaacggggaatc  
1-2tRNA-Pro(tgg)c[26802,26876]  
cagggtgtagctcagtttggttagagtacccgcttggagacgggaagtc  
gtaggttcgaatcctaccacctga  
1-3tRNA-Arg(tct)c[27994,28064]  
gtccttatggttagcggatgcacaagggttctactcccttagcgcgg

gttcgaatcctgctgaggact  
 1-4tRNA-Gly(tcc)c[28311,28381]  
 gcgggtatagatataaggtagtaccaaaggtttccaacatgtagtggg  
 gttcgaatccccctaccgct  
 1-5tRNA-Asn(gtt)c[28450,28523]  
 gtgtccttaactcagaggtcagagtgccgtcctgttaagtcggaagtcgc  
 tggttcaatccagcaggatacgc  
 1-6tRNA-Ser(tga)c[29144,29235]  
 ggaaggttggtagagcttggtataacgctagctctgaaaactagttgcc  
 ctggaatacagggtacaagggttcaatcccttaccttct  
 1-7tRNA-Phe(gaa)c[29248,29319]  
 gtagtcctagctgagatggattagcgcttgcttgaaaagcaagagaggca  
 ggttcgatacctcggactcca  
 1-8tRNA-Lys(ttt)c[29325,29396]  
 ggagttatggtgaaatggctatcactgcgggtttttaccccggtattcta  
 ggttcgaatcctagtggtctcca  
 1-9tRNA-Trp(cca)c[29521,29594]  
 taggggtatagttatctggtaaaatattggtttccaactccaatgaggt  
 gggttcaagtcctactatccctgt  
 1-10tRNA-Gln(ttg)c[29596,29668]  
 tggctctgtagccaagcggtaaggcaacggatttgattccgtgatacgtt  
 ggttcgaatccaactagaccagc  
 1-11tRNA-Thr(tgt)c[29687,29758]  
 gcttgatagttcaattggtagaacagtggtttgttaagcctcagacgtg  
 ggttcaagtcctactacaagca  
 1-12tRNA-Tyr(gta)c[29841,29922]  
 gtgccattcgcatagaggcaattgcgggggactgtaactcccctcccttc  
 ggggttccaaggttcgagtccttgatggcgca  
 1-13tRNA-Leu(tag)c[30283,30367]  
 tgccgagatggtggaactggtatacacggtagacttagaatctgctgtcc  
 caaggatatgtgggttcgaatcccactctcggtat  
 1-14tRNA-Asp(gtc)c[30833,30905]  
 gtgcgtatgatataatggctattatactcgactgtctatcgagaaatagg  
 ggttcgattccccttacgtgcgc  
 1-15tRNA-Ile(gat)c[31009,31081]  
 accagcatagcttaggaggcaaagcaaccgaccgataatcggtagtcctt  
 ggttcaattccaagtgttggtac  
 1-16tRNA-Ser(gct)c[31258,31344]  
 ggagagttgtcagagaggcttaatgatacgggttgtaactcgttgact  
 agtaatagtagcaagggttcgaatcccttactctcct  
 1-17tRNA-Cys(gca)c[31426,31496]  
 gcgggtataaccaactggaaaggtagtagactgcaaatctacgtatatgg  
 gttcaattccattaccgct

>EF460875.1 Enterobacteria phage phiEcoM-GJ1, complete genome

1-tRNA-Leu(cag)[14456,14550]  
ggacgagtagctcagaaggttgcattgtgctcagtcaggtagagcaatc  
tgttcgacagatgtgtcgttggttcgaatccaacctgtccgcca

>AP009390.1 Enterococcus phage phiEF24C DNA, complete genome

1-tRNA-Met(cat)c[136981,137054]  
ggacgttagctcagttggtagagcattcggctcataaccgaacggtcg  
caggttcgagacctgcaatgtcca

1-2tRNA-Leu(tag)c[137677,137761]  
gcagaagtgtggaactggtagacaacggtgtcttagaaacatcggctg  
taatggacgtgtgggttcgactcccgcttctgca

1-4tRNA-Arg(tct)c[138482,138557]  
tgtaggttagctcaatagtaggagcatccgccttctaagcggacggtt  
gggggttcgattccctccatctacgt

1-5tRNA-Trp(cca)c[139156,139229]  
tagtcggttagtgtaactggtaacacgttggtctccaaaaccaataatag  
gggttcaaatcctctaccgattgt

1-6tRNA-Asp(gtc)c[139479,139554]  
tggcagtatagggcagaggtgtcccaacacgttgtcagcgtggaacaca  
cgggttcgagtccttactgtcgtc

>EF469154.1 Enterobacteria phage JS98, complete genome

1-tRNA-Arg(tct)c[70206,70281]  
cgaggcatagctcagaaggaagagcaacggtcttctaaaccgtaggtcgt  
aggttcgatccctactgtctcgacca

1-2tRNA-Asn(gtt)c[70286,70360]  
ggatgtgtagctcagcggtagagcagttgactgttaatcaattggtccat  
ggttcgaatccatgcatgtccgcca

1-3tRNA-Met(cat)c[70365,70438]  
ggccctgtagctggacggtcaagcgagcgactcataatcgctggatggtg  
gttcgattccaccagggccacca

>EF602154.1 Burkholderia phage BcepNY3, complete genome

1-tRNA-Tyr(gta)[16343,16426]  
ggaggcgtggctgagtggtcgaaagcggcgactgtaaatccgttaccaa  
gttcgcggtggttcgaatccaccgtctccacca

>EU197055.1 Pseudomonas phage 201phi2-1, complete genome

1-tRNA-Leu(taa)c[300263,300349]  
gccggtgtgatcgaattggtatagtagcgacttaaaatccgcccccg  
taagggtgtgggatcgaggcccaccaccggcacca

>DQ832317.1 Escherichia coli bacteriophage rv5, complete sequence

1-tRNA-Pro(tgg)c[61976,62052]  
ctccgctagctcagcttggttagagcgctgatttgggatcaggaggtcg  
agtgttcgaatcactccgtggagacca

1-2tRNA-Met(cat)c[62064,62138]  
ggccctgtagctggaaggttcaagcaagcgactcataatgccagacggt  
ggttcaattccaccagggccacca



1-3tRNA-Thr(tgt)c[62140,62215]  
gctgatgtagcacaatcggtagtgaattgattgtaataataggttgt  
aggttcaagtccctgccatcagcacca  
1-5tRNA-Ser(tga)c[62418,62508]  
ggagggtaggagcaatggtgctcaagcggctctgaaaaccgtcccgttg  
aggatgactcgalgatgggtcgattccattactctccgccca  
1-6tRNA-Tyr(gta)c[62623,62709]  
ggggagttatcccgtagaggtagcgggtgtagactgtaaatctattgtcat  
tgcgactcgggtggttcgactccaccactccccacca  
1-7tRNA-Arg(tct)c[62714,62788]  
gccctgtagcttagtggataaagcagcggccttctaagccgttgacact  
ggttcgagtcagtagcgggtgcca

>AB366653.2 Ralstonia phage RSL1 DNA, complete genome

1-1tRNA-Gly(tcc)c[186301,186376]  
gcgggcgtagctcagttggtagagtcttgcctccaagcaagatgtcgc  
gagttcgagtctcgtcgcccgtcca  
1-3tRNA-Pro(tgg)c[186529,186606]  
ccgagtgtagcgcagctcgttagcgcacctgattgggatcagggggtc  
ggaggttcgaatcctctcactcggacca

>EU826466.1 Mycobacterium phage Myrna, complete genome

1-1tRNA-Ser(gct)[32466,32548]  
ggagggtgagtatcaggtgatacagcgagattgctaatacccgtacggctc  
atacccgtaggttcaagtcctcctccctccgc  
1-2tRNA-Leu(cag)[32662,32737]  
gccccctgggcaaatggcaaatcgctgcactcagactgcagagtttt  
ccgggttcgagtcggcggggggtac  
1-3tRNA-Leu(gag)[32799,32872]  
ggaccggtagcccaaaggcagaggcagcacgttgaggacgtgtccagtgc  
gggttcgactcccgtcgggtctac  
1-4tRNA-Leu(caa)[32873,32955]  
gctccagtggcgtaatggcagccgcgccgactcaaatgcggtgtccgt  
aggacgtgcgagttcgagtcgcctggagtac  
1-5tRNA-Pyl(cta)[33522,33593]  
gcgagattggtctggtgacctagcagcttctaaacctcgcgatcgaccg  
gttcgactccggtatctcgcgc  
1-6tRNA-Pro(tgg)[91832,91904]  
cgggatatggtgtaagggttagcacgattggttgggaccattctgacgg  
ggttcgagtcctgttcccgc  
1-7tRNA-Tyr(gta)[92391,92475]  
gccgtgtatgcccaactggtgttgggagcaggctgtaaccctgtggcct  
tcgggacggcgagttcgattctctgacgcggcac  
1-8tRNA-Met(cat)[92614,92688]  
agcggggtagagcagctcggtagctcgccaggctcataacctggaggccg  
tgggttcaatcccactcccgcac

1-9tRNA-Ala(tgc)[92828,92901]  
ggggatgcatgttccttggggcgactgatccttgcaagatcggtaggt  
gggttcgattcccatcatctccac  
1-10tRNA-Cys(gca)[92905,92977]  
gtgctgatggccgagatggttaggcactgggttgcaacccaggcacgca  
ggttcgagtcctgttcggcactc  
1-11tRNA-Glu(ctc)[93010,93081]  
ggtcctatgggtagtggtagcccatctccctctcacggagacggccga  
gttcaattctcgtaggactgc  
1-12tRNA-His(gtg)[93083,93155]  
gtggccatagttcaatggcagaacgccgggtgtgatcccggtcgcgagg  
gttcgattccctctggtcacccc  
1-13tRNA-Gly(tcc)[93156,93227]  
gcgctcgtggcatattggttgtctccagcctccaagctggctaagcag  
gttcgattcctgtcgggcgctc  
1-14tRNA-Ala(ggc)[93384,93457]  
ggggctgtagctcaatcggtagagcgtctcgctggcagtgagaaggcagt  
cggttcgalcccgaccagttccac  
1-15tRNA-Phe(gaa)[93490,93562]  
gccttcatagtcagttggtagagcgtcggactgaaaacccggaggccgt  
ggttcgattccacgtgtggcac  
1-16tRNA-Val(cac)[93566,93634]  
gtcctctagctctgggacagaagtcgggtcacatccgatcgagcggggt  
cgattccctgggggagtac  
1-17tRNA-Lys(ctt)[93647,93721]  
ggccctagagcacggtctggtagtctacggactctaatccgcaggtcg  
taggtcaaatactactggggccac  
1-18tRNA-Lys(ctt)[93732,93805]  
gcgctcgtagctcagctggtagagctgctgactcttaatcagcatgtcgg  
gggttcgagtcctccggcgctac  
1-19tRNA-Gly(gcc)[94110,94183]  
gtgcttgaggtgtaaatggtcgcacgacaccttgccaaggttaggaagc  
cggttcgatcccgtcaggcactc  
1-20tRNA-Asp(gtc)[94262,94337]  
ggcctatcgggtccagctctggagtgacaccgccctgtcacggcgagagc  
acgggttcaaataccgtataggtcgc  
1-21tRNA-Met(cat)[94418,94491]  
gcctgtgtagctcatctggcagagcgccctgctcataacggggaggtaag  
tggttcgagaccactcataggtac  
1-22tRNA-Ile(gat)[94589,94663]  
gcctgttagcggactggctcgtccgatccaagtgataactggcgcaagg  
agtgttcgattcactcagcaggtac  
1-24tRNA-Arg(acg)[94809,94882]  
ctcccggtggttcaacggatagagcgccagactacgaatctggagagtgg

gggttcgattccctctcgggagac  
 1-25tRNA-Met(cat)[94903,94977]  
 gtcggttatcgtttaacgaaaaacaattcactcataatgaatcactccg  
 gggttcgagtcggttcggctcca  
 1-26tRNA-Thr(ggt)[94998,95069]  
 gctggattagcatagtggttagtgccttccttggtatggaagtagccggg  
 gttcgattccccgattcagctc  
 1-27tRNA-Val(gac)[95075,95147]  
 gctctttagctcagtggttagagcaccagcccgacatgctggtgtccga  
 gggttcgattcctcgttgagcac  
 1-28tRNA-Thr(tgt)[95326,95397]  
 gcctccatcggttcagtggttagagcgcctgtaagcaggctgcgggc  
 gttcgattcgtcctggaggctc  
 1-29tRNA-Glu(ttc)[95403,95477]  
 gggttcggtggtctgctggctgtccactcaggtttccacctgggatacg  
 cgggttcgattcccggtccgaactac  
 1-30tRNA-Thr(cgt)[95561,95635]  
 gctggtagaagcgtgaacggtttacgcacggccctcgtaacgccgagaagt  
 cgggttcgactccgacctccagctcc  
 1-31tRNA-Arg(cct)[96160,96234]  
 gccgctgtagctcatgcggacagagcgaccgttcctaaacggtaggcag  
 ggggttcgagtcctcccagcgggtgc  
 1-32tRNA-Gln(ttg)[96267,96340]  
 tgaggtgtggtctgctggcaggccagcgggcctttgacccccgcctccgt  
 aggttcgattcctgccacctcagc  
 1-33tRNA-Arg(tct)[96341,96416]  
 gcctctgtagctcagtggtatagcaccgagttctacctcgggtgccgg  
 gattcgatcctctccagggcacca  
 1-34tRNA-Lys(ttt)[96419,96492]  
 ggggcgttggtgaacgcggctatcactcttggtttaccctgaatacc  
 gggatcgagaccggagccccac  
 1-35tRNA-Gln(ctg)[122545,122616]  
 tgctgttggtgtaatggcaacacgcgggtttctgacaccggtattcttg  
 gttcgagtccaggcgggcagc  
 1-36tRNA-Asn(gtt)[122636,122710]  
 tggctactagctcaattaggcagagcaacgccctgttaaggcgtcaggtg  
 aagggtcgagtccttcgtggccagc

>EU826468.1 Mycobacterium phage Spud, complete genome

1-1tRNA-Ser(gct)[31867,31950]  
 ggagggtgagcatctggtgatgcagggtcctgctaaggccctacggatt  
 cacaccggtgagtttcgattactcctccctccgc  
 1-2tRNA-Leu(cag)[32047,32123]  
 gccctgctgagcaaactggcaaagctgccgattcagagtgcgggtcatt  
 tccgggttcgactcccgggcagggtac

1-3tRNA-Leu(gag)[32243,32317]  
gtctctgtaggcaaatcgaaaagccgccatctgagggggtggtgcgtg  
cgggttcgactcccgccagagacac  
1-4tRNA-Leu(caa)[32318,32391]  
gccgtgtaggccatctggcgagccgccagttcaagtttcggtgttgc  
gggttcgaatcccgcacgttac  
1-5tRNA-Pro(tgg)[91905,91979]  
cggggtgtagttcagtttgaagagcgcttggttgggaccaagtgtcg  
caggttcgaatcctgtcacccgac  
1-6tRNA-Trp(cca)[91994,92064]  
gggtctgtgcacagggtgcccgcggtctcaaagccgaagcgggggtt  
cgattccctccagcctgcca  
1-7tRNA-Pyl(cta)[93255,93327]  
gcaccatttgctcaatggcagagcggcggttctaaaaccgtgagtccg  
gttcgactccggcatggtgcacc  
1-8tRNA-Met(cat)[93477,93551]  
agcgggtgtagagcagctaggtagctcgccgggctcataaccggaggacg  
cgtgttcgaatcacgccaccgccac  
1-9tRNA-Cys(gca)[93678,93749]  
gcgcctttggcggaatggctacgtgctcggtgcaacccgagttatcccg  
gttcgactccgggaggcgctc  
1-10tRNA-Glu(ctc)[93754,93828]  
ggtccgttgtagtagatggatatctgccaccctctcaaggtggagatca  
cgggttcaagcccgtacggactgc  
1-11tRNA-His(gtg)[93830,93903]  
gtggccgtagttcagccggtagaacgtgggtgtgatccagtcgtcga  
gggttcgagtcctccggtcaccc  
1-12tRNA-Ala(tgc)[94065,94139]  
gggcctgtagtccaattggtagagcagcatccttgaagatgacggctg  
tcggttcgaatccgacctggtccac  
1-13tRNA-Phe(gaa)[94329,94401]  
gccgtcatagctcagttggtagagcactggcctgaaaaccagtgccga  
ggttcgattcctcgtgtggcac  
1-14tRNA-Val(cac)[94407,94480]  
gtccgtttagctcagctggaagagcgctcgggtccaccccagaggccgc  
aggttcgatccctgcaatggacac  
1-15tRNA-Lys(ctt)[94599,94671]  
gccttcgtagctcagtggtagagctgtgcctctaagcgataggtcgtt  
ggttcgaatccagccgggggcac  
1-16tRNA-Glu(ttc)[94676,94752]  
ggtcgggtcggctgctggtatggccagtcggatttccactccggacatt  
cgcgggttcaattcccgtcccgatcgc  
1-17tRNA-Gly(tcc)[94832,94904]  
gcgggtgtggccgaatggctcaggcaccagatttccactctggctacgca

ggttcgattcctgtcatccgctc  
1-18tRNA-Thr(cgt)[94964,95038]  
gctgctgtagctcacctggcagagcgtcggcgtcgtatcccgaaggcatc  
cggttcgagtcggacagcagcccc  
1-19tRNA-Thr(tgt)[95039,95111]  
gcctctgtgtccagcggcacggacatccgccttctaagcggaggaccccc  
cgttcgatccgggtagaggctc  
1-20tRNA-Thr(ggt)[95171,95243]  
gctgggtagctcagtggtagagcgttcctctggtatgggaaagggccgg  
ggttcaatccccgactcagctc  
1-21tRNA-Gly(gcc)[96566,96639]  
gcgaaggtagctcagctggcagagcggcaccttgccaaggtggaggtcgc  
gggatcgcaacccgttcttcgctc  
1-22tRNA-Asp(gtc)[96643,96715]  
ggccctgtagctcagaggaagagcggcgtctgtcgaatcgaggtcgcg  
gtatcgtaatccgtcagggtcgc  
1-23tRNA-Met(cat)[96775,96847]  
gcctcactagctcattggttagagccgctcgtcataacgtgcaggtacct  
ggttcgattccagggtgaggtac  
1-24tRNA-Ile(gat)[96853,96927]  
gcctgttagcggactggctcgtccgatccaagctgataactggcgtaagc  
ggtgttcgattcaccgagcaggtac  
1-25tRNA-Arg(acg)[97021,97093]  
gcctctatggtccaacggatatgacccggtctacggaaccggagatgcg  
tgttcgattcgcgtaggggcac  
1-26tRNA-Val(gac)[97136,97208]  
gtccgtgtagctcagggtagagcgcctgctcgacacgcaggaggaccga  
ggttcgaaacctcgcatggacac  
1-27tRNA-Arg(cct)[97382,97455]  
gcctctgtagctcaacggacagagcaacgcggtcctaacgcggtggctgg  
aggttcgaatcctctcggaggcac  
1-29tRNA-Gln(ttg)[97996,98071]  
tggggatggtggcaatctggcagtcgccgcgactttgactccggaggt  
gcaggttcgagtcctgctaccccatc  
1-30tRNA-Arg(tct)[98075,98150]  
gccctgtagctcagtgacagagcggcgagcttctacctcgcgggccgg  
gagttcgaatctctccagggcacca  
1-31tRNA-Gln(ctg)[125262,125336]  
tgctcgttggtgtaactggcaacactacggactctgactccgtcattta  
ggttcgaatcctaagcgagcagcca  
1-32tRNA-Asn(gtt)[125343,125418]  
tgggggtgccgttaatcaggcaaacgagcggactgttaatccgcccctgc  
aggttcgaatcctgccacccagcca

>FJ839693.1 Enterobacteria phage RB51, complete genome

1-1tRNA-Arg(tct)c[71249,71325]  
cgaggcatagctcaattgtatagagcaacggacttctaatacgtagggtg  
aaggtagaatccttctgtctcgacca  
1-2tRNA-Asn(gtt)c[71330,71404]  
ggatgtgtagctcagtggtagagcagtgactgttaataatgggccat  
ggttcgaatccatgcatgtccgcca  
1-3tRNA-Tyr(gta)c[71409,71495]  
ggggagttatcccgtagaggtagcgggtggactgtaaattcattgtcat  
tgcgactcgggtggttcgactccatcactccccacca  
1-4tRNA-Met(cat)c[71508,71582]  
ggccctgtagctggaaggtcaagcaagcgcactcataatcgccagatggt  
ggtcaattccaccaggccacca  
1-5tRNA-Thr(tgt)c[71584,71659]  
gctgatttagctcagtaggtagagcaactcacttgaatgagaaggtcgg  
cggttcgattccgtcaatcagcacca  
1-6tRNA-Ser(tga)c[71665,71754]  
ggaggtgtggcagagtgggtgaatgcaccggtcttgaataaccggcagtcg  
ctccggcgaltcataggttcgaatcctatcacctccgcca  
1-7tRNA-Gly(tcc)c[72416,72489]  
gcggatatcgataatgggtattacctcagactccaatctgatgatga  
gttcgattctcattatccgctcca  
1-8tRNA-Leu(taa)c[72495,72581]  
gcgagaatggtaaattggtaaaggcacagcacttaaaatgctgcggaat  
gatttccttgggttcgagtccttctcgcacca  
1-9tRNA-Gln(ttg)c[72582,72655]  
tgggaattagccaagttggttaaggcactggattttgattccaggatgcaa  
aggttcgagtcctttattcccagc

>EU826467.1 Mycobacterium phage Rizal, complete genome

1-1tRNA-Ser(gct)[30469,30552]  
ggaggggtgagcatctggtgatgcaggggtcctgctaaggccctacggatt  
cacaccgtgagtttcgattactcctccctccgc  
1-2tRNA-Leu(cag)[30649,30725]  
gcctctgtgagcaactggcaagctgccgcattcagagtgccgggtcatt  
tccgggttcgactcccgggcagggtac  
1-3tRNA-Leu(gag)[30845,30919]  
gtctctgtaggcaaatcgaaaaagccgccatcttgagggggtggtgcgtg  
cgggttcgactcccgcagagacac  
1-4tRNA-Leu(caa)[30920,30993]  
gccgtggtaggccatctggcgagccgccgagttcaagtttcggtgtttgc  
gggttcgaatcccgcacgggtac  
1-5tRNA-SeC(tca)[66513,66609]  
attctggcactgggtggcgagcccaccggcgagcttcaagctgtcgct  
ggccggagaaccgaccggaacatcccgttaacgcgaccaggggcc  
1-6tRNA-Pro(tgg)[89818,89892]

cggggtgtagttcagtttgaagagcgttggttgggaccaagatgtcg  
caggttcgaatcctgtcaccgac  
1-7tRNA-Trp(cca)[89907,89977]  
gggtctgtgcacaggtgcccagcgtctcaaagccgaaggcgggggtt  
cgattccctccaggcctgcca  
1-8tRNA-Tyr(gta)[89979,90065]  
cccgatcatgcccactggtgttgggagcaggctgtaaatctgtggcct  
tcgggacgggtgaggttcgattcctcagtcgggacca  
1-9tRNA-Pyl(cta)[91119,91192]  
tgcgagatcgtgcacggcgactaggagcttctaaccctccgactcggg  
gttcgactcccgcatctcgacccc  
1-10tRNA-Met(cat)[91340,91414]  
agcgggtgtagagcagctaggtagctcgccgggctcatgaccggaggacg  
cgtgttcgattcacgccaccgcccac  
1-11tRNA-Cys(gca)[91541,91612]  
gcgcctttggcggaatggctacgtgctcggctgcaacccgagttatcccg  
gttcgactccgggaggcgctc  
1-12tRNA-Glu(ctc)[91617,91691]  
ggtccgttggagtagatggatatctgccaccctctcaagtgagatca  
cgggttcaagtcccgtacggactgc  
1-13tRNA-His(gtg)[91693,91766]  
gtggccgtagttcagccggtagaacgctgggtgtgatccagtcgtcga  
gggttcgagtcctccggtcacc  
1-14tRNA-Ala(tgc)[91928,92002]  
gggcctgtagtccaattggtagagcagcatcctgcaagatgacggctg  
tcggttcgaatccgacctggtccac  
1-15tRNA-Phe(gaa)[92192,92264]  
gccgtcatagctcagttggtagagcactggcctgaaaaccagtgggccga  
ggttcgattcctcgtgtcggcac  
1-16tRNA-Val(cac)[92270,92343]  
gtccgttagctcagctggaagagcgctcggccacacccgagaggccgc  
aggttcgatccctgcaatggacac  
1-17tRNA-Lys(ctt)[92462,92534]  
gccttcgtagctcagtggtagagctgtcgctcttaagcgataggtcgtt  
ggttcgaatccagccgggggcac  
1-18tRNA-Glu(ttc)[92539,92615]  
ggtcgggtcggtctgctggtatggccagtcggatttccactccggacatt  
cgcgggttcaattcccgtccgatcgc  
1-19tRNA-Gly(tcc)[92695,92767]  
gcgggtgtggccgaatggctcaggcaccagattccactctggctacgca  
ggttcgattcctgtcatccgctc  
1-20tRNA-Thr(cgt)[92827,92900]  
gctgctgtagctcacctggcagagcgtcggcgtcgtatcccgaaggcatc  
cgggttcgagtcggacagcagctc

1-21tRNA-Thr(tgt)[92909,92982]  
gccctttagctcagtggcagagcaccgaccttgtaagtcgggtgtccc  
gggttcgattcctggtagggctc  
1-22tRNA-Thr(ggt)[93491,93565]  
gctactgaggcccatatggatgggcgcggccatggtaaggccgaggtaga  
tgggttcaagtcctccagtagctc  
1-23tRNA-Gly(gcc)[94888,94961]  
gcgaaggtagctcagctggcagagcgcaccttgccaagtgagggtcgc  
gggatcgaaccgttcttcgctc  
1-24tRNA-Asp(gtc)[94965,95037]  
ggccctgtagctcagaggaagagcgcggctctgtcgaatcgagggtcgcg  
gtatcgaatccgtcagggtcgc  
1-25tRNA-Met(cat)[95097,95169]  
gcctcactagctcattggtagagccgctcgtcataacgtgcaggtacct  
ggttcgattccagggtgaggtac  
1-26tRNA-Ile(gat)[95175,95249]  
gcctgttagcggactggctcctccgatccaagctgataactggcgtaagc  
gggttcgattcaccgagcaggtac  
1-27tRNA-Arg(acg)[95343,95415]  
gcctctatggtccaacggatatgacccggtctacggaaccggagatgcg  
tgttcgattcgcgctaggggcac  
1-28tRNA-Val(gac)[95458,95530]  
gtccgtgtagctcaggggtagagcgcctgctcgacacgcaggaggaccga  
ggttcgaaacctcgcatggacac  
1-29tRNA-Arg(cct)[95704,95777]  
gcctctgtagctcaacggacagagcaacgcggtcctaacgcggtggctgg  
agggtcgaatcctctcggaggcac  
1-31tRNA-Gln(ttg)[96318,96393]  
tggggtatggtggcaatctggcagtcgcccgactttgactccggaggt  
gcaggttcgagtcctgctaccccatc  
1-32tRNA-Arg(tct)[96397,96470]  
gccctttagctcagtggaacagagcggcgagcttctacctcgcgggccgg  
gagttcgaatcctcaggggcac  
1-33tRNA-Lys(ttt)[96538,96614]  
gggcccgtatcttagtctggtaaagaagtggaactttaatccgcgcgcc  
gtgggttcgaatcccacccgcccacc  
1-34tRNA-Gln(ctg)[124144,124218]  
tgctcgttggtgtaactggcaacactacggactctgactccgtcattta  
ggttcgaatcctaagcgagcagcca  
1-35tRNA-Asn(gtt)[124225,124300]  
tggggtgccgttaatcaggcaaacgagcggactgttaatccgccctgc  
agggtcgaatcctgccaccccagcca

>EU826471.1 Mycobacterium phage Cali, complete genome

1-1tRNA-Ser(gct)[31290,31373]



ggagggtgagcatcaggtgatgcagcgagattgctaataccgtacggtaa  
ccaccccgtaggttcgaatcctcctccctccgc  
1-2tRNA-Leu(cag)[31566,31641]  
gtccccgtagccaattggcaggaggcaccagattcaggatctgggcagt  
tgagttcgaatctcaccgggagtac  
1-3tRNA-Leu(gag)[31761,31835]  
gtctctgtaggcaaatcgaaaaagccgccatcttgagggggtggtcgtg  
cgggttcgactcccgcagagacac  
1-4tRNA-Leu(caa)[31836,31909]  
gccgtggtaggccatctggcgagccgccagttcaagttcgggtttgc  
gggttcgaatcccgcacggtag  
1-5tRNA-SeC(tca)[68508,68604]  
attctggcactggtagggcgagcccaccggcgagcttcaagctgtcgct  
ggccggagaaccgaccggaacatcccggtcaacgcgacccagggcc  
1-6tRNA-Pro(tgg)[92217,92291]  
cgggggtgtagttcagtttgaagagcgttggtttgggaccaagatgtcg  
caggttcgaatcctgtcaccgccac  
1-7tRNA-Trp(cca)[92306,92376]  
gggtctgtgcacagggtccccgacggtctcaaagccgaaggcgggggtt  
cgattccctccaggcctgcca  
1-8tRNA-Tyr(gta)[92378,92464]  
cccgtagatgcccaactggtgttgggagcaggctgtaaccctgtggcct  
tcgggacggtaggttcgattcctcagtcggggacca  
1-9tRNA-Pyl(cta)[93578,93650]  
gcaccatttgctcaatggcagagcggcggttctaaaaccgtgagtgccg  
gttcgactccggcatggtgcacc  
1-10tRNA-Met(cat)[93800,93874]  
agcgggttagagcagctaggtagctcgccgggtcataaaccggaggacg  
cgtgttcgaatcacgccaccgccac  
1-11tRNA-Cys(gca)[94001,94072]  
g'gccttggcggaatggctacgtgctcggtgcaacccagttatccc  
gttcgactccgggaggcgctc  
1-12tRNA-Glu(ctc)[94077,94151]  
gttccgttgagtagatggatatctgccaccctctcaaggtggagatca  
cgggttcaagtcccgtacggactgc  
1-13tRNA-His(gtg)[94153,94226]  
gtggccgtagttcagccggtagaacgtgggttgtgatccagtcgtcga  
gggttcgagtcctccggtcacc  
1-14tRNA-Ala(tgc)[94388,94462]  
gggcctgtagctccaattggtagagcagcatcctgcaagatgacggctg  
tcggttcgaatccgacctggtccac  
1-15tRNA-Phe(gaa)[94652,94724]  
gccgtcatagctcagttggtagagcactggcctgaaaaccagtggccga  
ggttcgattcctcgtgtcggcac

1-16tRNA-Val(cac)[94730,94803]  
gtccgttagctcagctggaagagcgctcggccacacccgagaggccgc  
aggttcgatccctgcaatggacac  
1-17tRNA-Lys(ctt)[94923,94996]  
gccttcgtagctcagttggtagagctctgcctcttaagcgagatgtcgc  
aggttcgacccctgccggaggcac  
1-18tRNA-Glu(ttc)[95001,95077]  
ggcgggtcggctcgtcggtagccagtcggattttcactccggacatt  
cgcgggtcaattcccgtcccgatcgc  
1-19tRNA-Gly(tcc)[95157,95229]  
gcgggtgtggccgaatggctcaggcaccagatttcactctggctacgca  
ggttcgattcctgtcatccgctc  
1-20tRNA-Gly(tcc)[95329,95401]  
gcgggtgtggccgaatggctcaggcaccagatttcactctggctacgca  
ggttcgattcctgtcatccgctc  
1-21tRNA-Thr(cgt)[95461,95535]  
gctgctgtagctcacctggcagagcgtcggcgtcgtatcccgaagcatc  
cgggtcagatccggacagcagcccc  
1-22tRNA-Thr(tgt)[95536,95608]  
gcctctgtgtccagcggcacggacatccgccttgaagcggaggacccc  
cgttcgatccgggtagaggctc  
1-23tRNA-Thr(ggt)[95668,95740]  
gtcgggttagctcagtggttagagcgttcctctggtatgggaaaggccgg  
ggttcaatccccgactcagctc  
1-24tRNA-Gly(gcc)[97485,97560]  
gcggttatagctcagcctggccagagcatcacgttgccaacgtgaacgtc  
gcgggttcaaatcccgtagccgctc  
1-25tRNA-Asp(gtc)[97574,97646]  
ggcctgtagctcagaggaagagcgcggctcgtcgaatcgagggtcgcg  
gtatcgtaatccgtcagggtcgc  
1-26tRNA-Met(cat)[97706,97778]  
gcctcactagctcattggtagagccgctcgtcataacgtgcaggtacct  
ggttcgattccagggtgaggtac  
1-27tRNA-Ile(gat)[97784,97858]  
gcctgttagcggactggctcgtccgatccaagctgataactggcgtaagc  
ggtgttcgattcaccgagcaggtac  
1-28tRNA-Arg(acg)[97952,98024]  
gcctctatggtccaacggatatgacgccggtctacggaaccggagatgcg  
tgttcgattcgcgctaggggcac  
1-29tRNA-Val(gac)[98067,98139]  
gtccgtgtagctcagtggttagagcgcctgctcgacacgcaggaggaccga  
ggttcgaaacctcgatggacac  
1-30tRNA-Arg(cct)[98313,98386]  
gcctctgtagctcaacggacagagcaacgcggtcctaacgcggtggctgg

aggttcgaatcctctcggaggcac  
1-32tRNA-Gln(ttg)[98927,99002]  
tggggtatggtggcaatctggcagtcgcccgactttgactccggaggt  
gcaggttcgagtcctgctacccatc  
1-33tRNA-Arg(tct)[99006,99081]  
gccctttagctcagtgacagagcggcgagcttctacctgcggggcgg  
gagttcgaatcctccaggggcacca  
1-34tRNA-Gln(ctg)[125659,125733]  
tgctcgttgggtgaactggcaacactacggactctgactccgtcattctt  
ggttcgaatccagggcgagcaacca  
1-35tRNA-Asn(gtt)[125740,125815]  
tgggggtgccgtaatcagggcaaacgagcggactgttaatccgtccctgc  
aggttcgaatcctgccaccccagcca

>FJ230960.1 Bacillus phage SPO1, complete genome

1-1tRNA-Asn(gtt)[28208,28282]  
tcctctatagctcaatggtagagcacatgactgttaatcatgggggttga  
ggttcgaatcctactggaggagcca  
1-2tRNA-Ser(gct)[28368,28457]  
tggaatgttaccacaagtggtaaggggtctggttgctaaccagatagcgg  
gctttatgtccggcataggttcgaatcctatacattccgt  
1-3tRNA-Arg(cct)[32596,32670]  
tgcccatgtagctcagtgatagagcacgtccctcctaaggacggtgtcg  
ggagttcaaatctctccatgggct

>EU710883.1 Erwinia phage phiEa21-4, complete genome

1-2tRNA-Pro(tgg)[22037,22114]  
ctccgttagctcagtatggatagtaggcccgttggggcggtcgggtc  
gaaggttcgaatccttcaacggagacca  
1-3tRNA-Ala(tgc)[22235,22307]  
gggtcagtagcttaattgggaaagcatctcacttgcaatgagaaggatga  
gggttcaagtccctcctgtatcc  
1-4tRNA-Met(cat)[22490,22564]  
agcgggatggagcagtggtagcttccagtttcattatctggaggtcgta  
ggttcgaatcctactccgcttcca  
1-5tRNA-Asn(gtt)[22573,22648]  
gggttgaagcacatatggatgtgcggctggctgttaaccagatggtagt  
gggttcgagtcccaccttcccacca  
1-6tRNA-Tyr(gta)[22655,22737]  
gcgtctatggcagagatggatcaatgcagcggctctgtaaaacgccccgaa  
aggttactggttcgagtccagttaggcgacca  
1-7tRNA-Met(cat)[22744,22817]  
tgcaagtagtgaaatggcatcactatggtttcattatccggttaggta  
gttcgaatctacccttcgcatcca  
1-8tRNA-Asp(gtc)[22897,22973]  
ggggatgtggcagacttggttaattgtaccgactgtctatgcggaatatg

agggttcaaatcccttcacctcgcca  
1-9tRNA-Ser(tga)[23201,23291]  
ggaaggcgaaatcgactggcgacgaaaacggtcttgaaaaccgccgagcg  
ttaatagcgccttgagggttcgactccctctccttcgcca  
1-10tRNA-Phe(gaa)[23293,23367]  
ggctcaattagcttatatggtaaagcaacggtctgaaaagccgtggaaca  
gggttcgaatcccgatagaccgcca  
1-11tRNA-Lys(ttt)[23375,23450]  
cgggtgtgaactcaattggcagagtgggtggctttaaccacagggttgc  
agggtcgatgcctgtcacaccgacca  
1-12tRNA-Lys(ctt)[23458,23534]  
ggactattaactcaactggtcagagtacccgactcttaatcgggaggttc  
agggttcgactccctgatagctacca  
1-13tRNA-Met(cat)[23546,23619]  
agtggatggcagagatggatcatgcacttcctcatcacggaagattacat  
cgggtcaagtccgattaccacttc  
1-14tRNA-Ile(gat)[23633,23707]  
tgtgggttagcataaatggtaatgcagacggctgalaaccgtcagaagag  
ggttcgataccctcacctacgacca  
1-15tRNA-Gln(ttg)[23714,23789]  
cggggtatggagtaattggcaactctacggtttttgaggccgtcagttt  
cgggtcgaatccgaatgccccgcca  
1-16tRNA-Arg(tct)[23796,23872]  
gcacccttagaacaactggacagttccgctgtcttctaacagctagtta  
cagggtcgagtctgtagggtgtgcca  
1-17tRNA-Leu(caa)[24290,24366]  
ggcgtaatatcccaattggcagaggaagcaggttcaaaccctgttcagt  
tgggttcgactcccacttacgtacca  
1-18tRNA-Gly(tcc)[24496,24571]  
gcaagtatgatgtcaactggtaacatggcgtcctccaagtcgctcttac  
gggttcgaatcccgttacttgctcca  
1-19tRNA-Trp(cca)[24577,24652]  
taggggattagttaactggcaaatgtcggcctccaaaccgcacgttg  
agggttcgaatccctcatcccctgtc  
1-20tRNA-Thr(tgt)[24663,24737]  
gcctccatcatataagggtattatgcctgtttgtaatcaggtcatcgc  
ggttcgaatccgtgtgggggcacca  
1-21tRNA-Val(tac)[24745,24820]  
actcgtatagctcagatggtagagcgcatcttacacgttgctggtcag  
gcgttcgagtcgccttcgagtagta  
1-22tRNA-Leu(aag)[24827,24904]  
ggctgtgtagcccaactggcagaggcactacgctaagaacgtatacagt  
gagagttcgaatctctccacagtagta  
1-23tRNA-Arg(acg)[24911,24987]

agccctttatcttaaatggatagagactcaagctacgaacttgagaggtt  
tgggttcgaatcccaaaagggttcca

1-24tRNA-Gln(ctg)[24990,25066]

aggatgttcgtatagttggcctattacaccggactctgaatccggttacg  
atggttcgaatccatcacgtcctgcc

1-25tRNA-Leu(taa)[25073,25149]

aggtgattacccaattggcagagggtaggagctaaacctccgatgttg  
agagttcgaatctctcatcacctacca

1-26tRNA-His(gtg)[25153,25229]

gagttggtatcataaatggataatgacctgactgtgaatcaggtctatg  
cgggttcgaatcccgctcttctcccca

1-27tRNA-Ser(gct)[25236,25328]

ggaagattaaccctaaaaggtaagggaagtgttgctaaacctcagtaa  
ccgagaaatcggcgtaccagttcaagtctggtatcttctcca

>EU863409.1 Enterobacteria phage JS10, complete sequence

1-1tRNA-Arg(tct)c[68440,68515]

cgaggcatagctcagaaggaagagcaacggtcttctaaaccgtaggtcgt  
aggttcgalccctactgtctcgacca

1-2tRNA-Asn(gtt)c[68520,68594]

ggatgtgtagctcagtggttagagcagttgactgttaatcaattggtccat  
ggttcgaatccatgcatgtccgcca

1-3tRNA-Met(cat)c[68599,68672]

ggccctgtagctggacggtcaagcgagcgactcataatcgctggatggtg  
gttcgattccaccagggccacca

>EU826469.1 Mycobacterium phage ScottMcG, complete genome

1-1tRNA-Ser(gct)[30892,30975]

ggagggtagcatctggtgatgcaggggtcctgctaaggccctacggatt  
cacaccctgagtttcgattactcctccctccgc

1-2tRNA-Leu(cag)[31072,31148]

gccctgctgagcaaaactggcaaagctccgcattcagagtcgggtcatt  
tccgggttcgactcccgggcagggtac

1-3tRNA-Leu(gag)[31268,31342]

gtctcttaggcaaatcgaaaagccgccatcttgaggggtggtgcgtg  
cgggttcgactcccgcagagacac

1-4tRNA-Leu(caa)[31343,31416]

gccgtggtaggccatctggcgagccgagttcaagtttcggtgtttgc  
gggttcgaatcccgcacggtac

1-5tRNA-Pro(tgg)[90789,90863]

cggggtgtagttcagtttgaagagcgcttggttgggaccaagtgtcg  
caggttcgaatcctgtcaccccgac

1-6tRNA-Trp(cca)[90878,90948]

gggtctgtgcacagggtccccgacggtctcaaagccgaaggcgggggtt  
cgattccctcaggcctgcc

1-7tRNA-Pyl(cta)[92139,92211]

gcaccatttgctcaatggcagagcggcggttctaaaaccgtgagtgccg  
gttcgactccggcatggtgcacc  
1-8tRNA-Met(cat)[92361,92435]  
agcgggttagagcagctaggtagctcgccgggtcataaaccggaggacg  
cgtgttcgaatcacgccaccgccac  
1-9tRNA-Cys(gca)[92562,92633]  
gcgcctttggcgaatggctacgtgctcggtcgaacccgagttatccc  
gttcgactccgggaggcgctc  
1-10tRNA-Glu(ctc)[92638,92712]  
gtgccgttgagtagatggatatctgccaccctctcaagtgagatca  
cgggttcaagtcccgtacggactgc  
1-11tRNA-His(gtg)[92714,92787]  
gtggccgtagttcagccggtagaacgtgggttgtgatccagtcgtcga  
gggttcgagtcctccggtcacc  
1-12tRNA-Ala(tgc)[92949,93023]  
gggcctgtagctccaattggttagagcagcatcctgcaagatgacggctg  
tcggttcgaatccgacctggtccac  
1-13tRNA-Phe(gaa)[93213,93285]  
gccgtcatagctcagttggttagagcactggcctgaaaaccagtgccga  
ggttcgattcctcgtgtcggcac  
1-14tRNA-Val(cac)[93291,93364]  
gtccgttagctcagctggaagagcgctcggccacacccgagaggccgc  
aggttcgatccctgcaatggacac  
1-15tRNA-Lys(ctt)[93483,93555]  
gccttcgtagctcagtggttagagctgtcgcctttaagcgataggctgtt  
ggttcgaatccagccgggggcac  
1-16tRNA-Glu(ttc)[93560,93636]  
gttcgggtcggctcgtcgttatggccagtcggattttcactccggacatt  
cgcgggttcaattcccgtcccgatcgc  
1-17tRNA-Gly(tcc)[93716,93788]  
gcgggtgtggccgaatggctcaggcaccagattccactctggctacgca  
ggttcgattcctgtcatccgctc  
1-18tRNA-Thr(cgt)[93848,93922]  
gtcgtgtagctcacctggcagagcgtcggcgtcgtatcccgaagcatc  
cgggttcgagtcggacagcagcccc  
1-19tRNA-Thr(tgt)[93923,93995]  
gcctctgtgtccagcggcacggacatccgccttgaagcgaggacccc  
cgttcgatccgggttagaggctc  
1-20tRNA-Thr(ggt)[94055,94127]  
gtcgggttagctcagtggttagagcgttcctctggtatgggaaagggccgg  
ggtcaatcccccgactcagctc  
1-21tRNA-Gly(gcc)[95450,95523]  
gcgaaggtagctcagctggcagagcgccaccttgccaagtgagggtcgc  
gggatcgcaacccgttcttcgctc

1-22tRNA-Asp(gtc)[95527,95599]  
ggccctgtagctcagaggaagagcgccggtctgtcgaatcggaggtcgcg  
gtatcgtaatccgtcagggtcgc  
1-23tRNA-Met(cat)[95659,95731]  
gcctcactagctcattggtagagccgctcgtcataacgtgcaggtacct  
ggttcgattccagggtgaggtac  
1-24tRNA-Ile(gat)[95737,95811]  
gcctgttagcggactggtcgtccgatccaagctgataactggcgtaagc  
ggtgttcgattcaccgagcaggtac  
1-25tRNA-Arg(acg)[95905,95977]  
gcctctatggtccaacggatatgacgccggtctacggaaccggagatgcg  
tgttcgattcgcgctaggggcac  
1-26tRNA-Val(gac)[96020,96092]  
gtccgtgtagctcaggggtagagcgctcgtcgacacgcaggaggaccga  
ggttcgaaacctcgcatggacac  
1-27tRNA-Arg(cct)[96266,96339]  
gcctctgtagctcaacggacagagcaacgcggctctaacgcggtggctgg  
aggttcgaatcctctcggaggcac  
1-29tRNA-Gln(ttg)[96880,96955]  
tggggtatggtggcaatctggcagtcgcccggttctgactccggagggt  
gcaggttcgagtcctgctaccccatc  
1-30tRNA-Arg(tct)[96959,97034]  
gccctttagctcagtgagacagcgcgagcttctacctcggggcccgg  
gagttcgaatcctccaggggcacca  
1-31tRNA-Gln(ctg)[124908,124982]  
tgctcgttggtgtaactggcaacactacggactctgactccgtcattta  
ggttcgaatcctaagcgagcagcca  
1-32tRNA-Asn(gtt)[124989,125064]  
tggggtgtccgttaatcaggcaaacgagcggactgttaatccgccctgc  
aggttcgaatcctgccacccagcca

>FJ822135.1 Lactobacillus phage Lb338-1, complete genome

1-2tRNA-Arg(cct)c[23807,23880]  
tgttccatagaacaatggatagttaccggttcttaaaccgttaattc  
cgggtcagtcggatggaaacat  
1-3tRNA-Arg(tct)c[24706,24779]  
gttcccatagttcaattggatagtaacatctgccctctaagcagagactc  
ccagttcgagtctgggtgggaaca  
1-4tRNA-Ile(tat)c[25603,25691]  
tagtcctgtagcactatggcagtcaccgggttataaccgtactcctg  
ataagagggttaagtgggtccgattcccaccgggactat  
1-5tRNA-Thr(tgt)c[27758,27832]  
tgcttcctagctcatatggtagagcatctgtttgtaatcagaaggtga  
ctggttcgatcccagtaggaagcat

>FJ839692.1 Enterobacteria phage RB14, complete genome

1-1tRNA-Arg(tct)c[68093,68168]  
cgaggcatagctcagaaggaagcaaggaccttctaagtcctgggtcgt  
aggttcgatccctactgcctcgacca

1-2tRNA-Asn(gtt)c[68173,68247]  
ggatgtgtagctcaatggcagagcgatcgctgttaagcgattggtata  
ggttcgaalcctatcacgtccgcca

1-3tRNA-Tyr(gta)c[68252,68338]  
ggggagttatcccgtagaggtagcggtgtggactgtaaattcattgtcat  
tgcgactcgggtgggtcgactccatcactccccacca

1-4tRNA-Met(cat)c[68348,68422]  
ggccctgtagctggaaggtcaagcaagcgactcataatcgccagatggt  
ggtcaattccaccaggccacca

1-5tRNA-Thr(tgt)c[68424,68499]  
gctgatttagctcagtaggtagagcaactcacttgaatgagaaggtcgg  
cggttcgattccgtcaatcagcacca

1-6tRNA-Ser(tga)c[68505,68594]  
ggaggcgtggcagagtggtttaatgcaccggtcttgaaaaccggcagtcg  
ctccggcgactcataggttcaaatcctatcgctccgcca

1-7tRNA-Pro(tgg)c[68596,68670]  
ctccgtgtagctcagtttgtagagcgctgattgggatcaggaggtcc  
aaggttcaaatccttgtatggagac

1-8tRNA-Gly(tcc)c[68681,68754]  
gcggatatcgataatggcattacctcagacttccaatctgatgatgga  
gttcgattctcattatccgtcca

1-9tRNA-Leu(taa)c[68760,68846]  
gcgagaatggtaaattggtaaaggcacagcacttaaaatgctgcggaat  
gatttccttgtgggttcgagtcctcacttctcgacca

1-10tRNA-Gln(ttg)c[68847,68920]  
tgggaattagccaagttggttaaggcactggattttgattccagatgcaa  
aggttcgagtcctttattccagc

>GQ303260.1 Mycobacterium phage ET08, complete genome

1-1tRNA-Ser(gct)[29156,29239]  
ggagggtgagcatcaggtgatgcagcgagattgctaataccgtacggtaa  
ccaccccgtaggttcgaatcctcctccctccgc

1-2tRNA-Leu(cag)[29432,29507]  
gctcccgtagcccaattggcaggaggcaccagattcaggatctgggcagt  
gtgagttcgaatctcaccgggagtac

1-3tRNA-Leu(gag)[29627,29701]  
gtctctgtaggcaaatcgaaaagccgcatcttgagggggtggtcgctg  
cgggttcgactcccgcagagacac

1-4tRNA-Leu(caa)[29702,29775]  
gccgtggtaggccatctggcgagccgccgagttcaagtttcggtgttgc  
gggttcgaatcccggccacggtac

1-5tRNA-SeC(tca)[67162,67258]



attctggcactggtggcgagcccaccggcgagccttcaagctgtcgt  
ggccggagaatcgaccggaacatcccgttcaacgcgaccagggcc  
1-6tRNA-Pro(tgg)[90457,90528]  
cggggtgtagtgaagcatcatgctggtttgggtaccagtgggtccg  
gttcgagtccgggtccccgac  
1-7tRNA-Trp(cca)[90967,91042]  
aggggtagagccagctgggacggcagcggattccaaacccgccattgacg  
gagttcgattctccgtaccctgcc  
1-8tRNA-Tyr(gta)[91044,91129]  
ccgggaagccatgttggttatggcaggcagactgtaaatctgtcgtctt  
cggacttcgggggttcgattccctctaccggacca  
1-9tRNA-Pyl(cta)[92188,92260]  
gcaccatttgctcaatggcagagcggcggttctaaaaccgtgagtgccg  
gttcgactccggcatggtgcacc  
1-10tRNA-Met(cat)[92410,92484]  
agcgggttagagcagctaggtagctcgccgggtcatgaccggaggacg  
cgtgttcgattcacgccaccgccac  
1-11tRNA-Cys(gca)[92611,92682]  
gcgccttggcggaatggctacgtgctcggctgcaacccgagttatcccg  
gttcgactccgggaggcgctc  
1-12tRNA-Glu(ctc)[92687,92761]  
ggtccgttgagtagatggatatctgccaccctctcaaggtggagatca  
cgggttcaagtcccgtacggactgc  
1-13tRNA-His(gtg)[92763,92836]  
gtggccgtagttcagccggtagaacgtgggttgtgatccagtcgtcga  
gggttcgagtcctccggtcaccc  
1-14tRNA-Ala(tgc)[92999,93072]  
gggcctatagctcatctggtagagcgctgccttgcaagcaggaggcggc  
aggttcaagtcctgttaggtccac  
1-15tRNA-Phe(gaa)[93262,93334]  
gccgtcatagctcagttggtagagcaccggcctgaaaacccggaggccga  
ggttcgagtcctcgtgtcggcac  
1-16tRNA-Val(cac)[93340,93413]  
gtccgttagctcagctggaagagcgtcggccacacccgagaggccgc  
aggttcgatccctgcaatggacac  
1-17tRNA-Lys(ctt)[93532,93604]  
gccttcgtagctcagtggtagagctgtcgctcttaagcgataggtcgtt  
ggttcaatccagccgggggcac  
1-18tRNA-Glu(ttc)[93608,93683]  
ggtcgggtggtctgttggcaggccggtcgggttttaccgccggtcatc  
gcgggttcgattcccgtcccactgc  
1-19tRNA-Gly(tcc)[93813,93885]  
gcgggttgggcgaatggctcaggcaccagacttccactctggctacgca  
ggttcgattcctgtcatccgctc

1-20tRNA-Thr(cgt)[93945,94018]  
 gctgctgtagctcacctggcagagcgtcggcgtcgtatcccgaaggcatc  
 cgggttcgagtcgacagcagctc  
 1-21tRNA-Thr(tgt)[94027,94100]  
 gccctttagctcagtggcagagcaccgacctgtgaagtcgggttgctcc  
 gggttcgaltcctgtaggggctc  
 1-22tRNA-Thr(ggt)[94151,94223]  
 gctgatttagctcagtggtagagcgcgacttggtatgtcggaggccccg  
 ggttcgatccccggattcagctc  
 1-23tRNA-Gly(gcc)[95968,96043]  
 gcgggttagctcagcctggccagagcatcacgttgccaacgtgaacgtc  
 gcgggttcaaataccgctagccgctc  
 1-24tRNA-Asp(gtc)[96057,96129]  
 ggccctgtagctcagaggaagagcgcgggtctgtcgaatcgagggtcgcg  
 gtatcgtaatccgtcagggtcgc  
 1-25tRNA-Met(cat)[96189,96261]  
 gcctcactagctcattggtagagccgctcgtcataacgtgcaggtacct  
 ggttcgattccagggtgaggtac  
 1-26tRNA-Ile(gat)[96267,96341]  
 gcctgttagcggactggctgctccgatccaagctgataactggcgtgaagc  
 ggtgttcgattcaccgagcaggtac  
 1-27tRNA-Arg(acg)[96435,96507]  
 gcctctatggtccaacggatatgacccggtctacggaaccggagatgcg  
 tgttcgattcgcgctaggggcac  
 1-28tRNA-Val(gac)[96550,96622]  
 gtccgtgtagctcaggggtagagcgcctgctcgacacgcaggaggaccga  
 ggttcgaaacctcgcatggacac  
 1-29tRNA-Arg(cct)[96796,96869]  
 gcctctgtagctcaacggacagagcaacgcggtcctaacgcggtggctgg  
 aggttcgaatcctctcggaggcac  
 1-31tRNA-Gln(ttg)[97410,97485]  
 tggggtatggtggcaatctggcagtcgcccggttgaactccggaggt  
 gcaggttcgagtcctgctacccatc  
 1-32tRNA-Arg(tct)[97489,97564]  
 gccctttagctcagtggaagagcggcgagcttctacctcgcgggccgg  
 gattcgaatctctccaggggcacca  
 1-33tRNA-Gln(ctg)[125485,125559]  
 tgctcgttggtgtaactggcaacactacggactctggctccgtcattctt  
 ggttcgaatccagggcgagcaacca  
 1-34tRNA-Asn(gtt)[125566,125639]  
 tggggtgtagttcaactggaagaacgctcgactgttaatcgagtagttga  
 aggttcgagtccttccactccage  
 >EU877232.1 Enterobacteria phage WV8, complete sequence  
 1-1tRNA-Pro(tgg)[25986,26062]

ctctgttagctcagcttggttagagcgtccgtttggggcggttaaggccg  
gaggttcaagtcctccaacagagacca  
1-2tRNA-Glu(ttc)[26070,26147]  
gttcagtagacaaaatggtaaagtcaccactcttcaaagtggtatct  
gagggttcaaatcccttctggaacgcca  
1-3tRNA-Met(cat)[26238,26314]  
tgcgggtatagagaaaggcgtctcacatgtctcattagcatggtatcgg  
caggttcgactcctgcacccgcctcca  
1-4tRNA-Asn(gtt)[26398,26475]  
ggtt.aggaagcacataaggtatgtcggtcgcctgttaagcgaatggca  
cagggttcgaatccctgactaaccgcca  
1-5tRNA-Tyr(gta)[26485,26572]  
gtgtcgttatcccgtagatggtagcggtagggactgtaaatcccttgta  
ttgagactcggtagggtcgactcctacacggcacacca  
1-6tRNA-Asp(gtc)[26578,26655]  
ggttatgtagttaatctggtaaaatactcccctgtcacgggagatgat  
gagggttcgaatcccttcgtaaccgcca  
1-7tRNA-Lys(ttt)[27085,27160]  
ggaagtgtagcagaatggtgatgcggcagacttttaatctgacaggcgat  
gggttcgaatccctccacttctacca  
1-8tRNA-Met(cat)[27165,27241]  
ggttcagtcgcagataaggtaatgcaagggtctcataagccctatgaatg  
tgggttcgattcccatctgaacctcca  
1-9tRNA-Ile(gat)[27243,27318]  
gctggtatagttaagaagggtataacactcccctgataagggaacatcgg  
tggttcgattccacctaccagtacca  
1-10tRNA-Trp(cca)[27798,27868]  
aggggtgagctatggcagcaatagagtctccaaaattcttgattagagt  
cgaatctctacaccctgccca  
1-11tRNA-Ser(tga)[28301,28390]  
ggtaggtagcggctaattggcagccaaacagtcttgaaaactgttgccact  
gtagagatacggtaggggttcgactccttacttaccgcc  
1-12tRNA-Leu(tag)[28645,28721]  
gcacctatagcccaactggtagaggcagcagacttagaatctgctcagtg  
tgagttcgaatctctctaggtgtacca  
1-13tRNA-Lys(ctt)[28729,28804]  
gcaggtgtagcaaatggttatgcggctgactcttaatcagtaagacgat  
gggttcaattccctccacctgtacca  
1-14tRNA-Ala(tgc)[28811,28886]  
ggggtcatagtttatatggttaaaatcgagttttgcaaacttggaact  
gagttcaattctcagtgactccacca  
1-15tRNA-Gly(tcc)[28893,28967]  
gcatccatagttaaacgggaaaattacagtcttccaaactgaggttgag  
ggttcgattccctctggatgtcca

1-16tRNA-Thr(tgt)[28975,29050]  
gctcctatcgataattgggtattacgggtgccttgaagcaacttatca  
gggttcgagtccttgtgggagcacca

1-17tRNA-Val(tac)[29147,29221]  
actcgcttagtttatatggtaaaacatcacccttacaagatgaagaaaaa  
ggttcaagtcctttagtgagtacca

1-18tRNA-Leu(caa)[29223,29300]  
gttccagtatcccaattggcagaggatgcaagctcaaacctgtattagt  
gacggttcgaatccgtcttgaacacca

1-19tRNA-Arg(acg)[29306,29381]  
gcaggattagttcaaatggaaagagcaacagctctacgaagctgttaatag  
gggttcgaatcccttatcctgcgcca

1-20tRNA-Gln(ttg)[30204,30279]  
aggggattagttacaagggtaaaacctcggctcttgaaatcgaagaagt  
tggttcaattccaacatccccgccca

1-21tRNA-Leu(taa)[30282,30360]  
gctccattactccaattggcagagagccagactaaaatctgtgttatg  
tatcgggttcgaatccgatalggagtacca

1-22tRNA-Gln(ctg)[30366,30441]  
agcggtatagcataactggcaatgcagcagctctgaagctgtcctatta  
aggttcaaactcttatgccgtgccca

1-23tRNA-His(gtg)[30473,30548]  
gtggccttatcataaatggtaatgacccatgctgtgaacatgggtctatac  
gggttcaaactccgtaggtcacccca

1-24tRNA-Phe(gaa)[30555,30630]  
agtccaagtagcttatatgggttaaagcgcgtgtctgaaaaacatgagaag  
agggttcaaactccactggactacca

1-25tRNA-Ser(gct)[31384,31476]  
ggaagattaaccctaaaaggtaagggagcagtttgctaaactgccagtag  
ctgagaaatcgggtgtaccagttcaagtcgttatcttctcca

1-26tRNA-Cys(gca)[31481,31556]  
gaatccgtgacagaaacggctatgtgcctgtctgcaaacaggtttataa  
gggttcgagtccttcggattctcca

>FM207411.1 Synechococcus phage S-RSM4 complete genome

1-1tRNA-Gly(tcc)c[29459,29530]  
gcggagtagttcagtggtagaacgctatccttccaagttagatgtcgtc  
ggttcgaatccgatactccgct

1-2tRNA-Pro(tgg)c[31213,31288]  
tcggggtgtagctcagcttggtagagcgcgctcttgggaggcgatgcc  
gtaggttcgaatcctatcaccccgat

1-3tRNA-Ser(tga)c[31291,31376]  
ggagagtggtcagtggtgaaggctctagtcttgaaaactagcgaggt  
gaaagcctccgtgggttcgaatcccacctctccgc

1-4tRNA-Val(tac)c[31852,31923]

gggcgattagcgagcggtagcgagtgctttacacgaattggcggg  
ggttcgaatccctcatcgcca

1-5tRNA-Leu(tag)c[31926,32008]

tcggtatggcggaattggtagacgcgtgggttaggtccagtgctcct  
tgcgacgtggaggttcaagtcctctaccgaca

1-6tRNA-Arg(tct)c[32009,32085]

gactcaatagctcagctggatagagcaactgccttctaagcagtcggtcg  
taggttcgaatcctacttgagtcgcca

1-7tRNA-Tyr(gta)c[176122,176203]

gggtaggtgtccgagtggttaatggaggcggactgtaaatccgctggctc  
tgctacgggggttcaaatccctccctgcca

1-8tRNA-Asn(gtt)c[176206,176279]

ttggcgtgtagctcaatggcagagcaggagctgtaactctctggttc  
aagttcgagcttgccacgccagt

1-9tRNA-Ala(tgc)c[176306,176378]

ggggaattagctcagttggtagacacctgcttgcaagcaggctgtcag  
gagttcgagtcctctattctcca

1-10tRNA-Thr(tgt)c[176379,176455]

gccactatagctcagctggatagagcaacggtttgtaaacgtaggtcg  
tcggttcaagtcgacttggtgctcca

1-11tRNA-Asp(gtc)c[176458,176533]

tggggtgtagctcagtcggttagagcgctgcctgtcacgcaggaagtc  
gagggttcaagtccttcagtcctcgt

1-12tRNA-Leu(taa)c[177356,177440]

gggacggtggtggaattggtagacacaccagacttaaaatctgttgattg  
taaagatcgtgcgggttcaagtcctcgtcctca

>GU295964.1 Klebsiella phage KP15, complete genome

1-1tRNA-Met(cat)[49401,49477]

ggccccttagctcaataggtagagctaatactcataatgggttaggtcc  
cggttcaagtcacgggagggccacca

>HM452126.1 Aeromonas phage phiAS5, complete genome

1-1tRNA-Ala(cgc)c[181347,181421]

acgcgattagctcagtgaggagagcgctctgatcgagagaagtatcggg  
accggttcgaatccggtatagtgtg

1-2tRNA-Met(cat)c[189405,189479]

ggccccgtaacataagggtaaatgtgctcgctcataagcgaagaaaagc  
ggttcgagtcgctcggggccacca

1-3tRNA-Leu(tag)c[189963,190046]

gcggatgtggcgaaattggcagacgcactagattaggttctagcgcct  
aggcgtgtcggttcgagtcgacctccgacca

1-4tRNA-Ser(gct)c[190053,190140]

ggagaaatgacagagaggccgaacgtagcggattgctaattcgtaggccc  
gcaagggtccgtgggttcgaatcccactttctcctcca

1-5tRNA-Ser(tga)c[190949,191042]

ggaaggtaacccgatagccggcgacgggagcggcttgaaaaccgtcga  
gggttaacagcccctgtgagttcgaccctcacacctccgcca  
1-6tRNA-Gln(ttg)c[191317,191392]  
aggggtatcgccaagttggaaaggcaacggattttgattccgtcattcgc  
tggttcgagtcagctacccccgcca  
1-7tRNA-Pro(tgg)c[191652,191726]  
ctcgggttaggcaagtggatgtcgcctggttgggaccaggtcgtcag  
tgttcgattcactacccgagacca  
1-8tRNA-Lys(ttt)c[191862,191937]  
gcgccgttagcttagttggtagagcatcggacttttaacccgaggtcga  
tggttcgagtcacacggcgaccca  
1-9tRNA-Trp(cca)c[191944,192017]  
agggcgtagcaaatcggttatgcggcgattccaaatccgttgaggtgg  
gttcgactcctaccgccctgcca  
1-10tRNA-Cys(gca)c[192845,192919]  
gcgcaggtagccaagcggttaaggcaagtattgcaaatcactttatcgtc  
tgttcgatccagatcctgtgtcca  
1-11tRNA-Gly(tcc)c[192927,193000]  
gccttcttagtttaattgtaaaaccactgcctccaagcagacgtcgtgg  
gttcgattccacagagggtcca  
1-12tRNA-Ala(tgc)c[193012,193087]  
ggggatatagtcagttgggagagcactagcctgcaagctgggggtcgt  
gggttcgagtccttattgtctccacca  
1-13tRNA-Asp(gtc)c[193373,193447]  
ggtgcattagtagtataatggctattatctgactgtctatcacaggatac  
ggttcgattcccgtatgtaccgcca  
1-14tRNA-Tyr(gta)c[193571,193662]  
ggagacgctgcaatgacgggtgattgcaccagactgtaaatctggcccc  
acagggtgaacattgtaggtcgaatcctaccggctccacca  
1-15tRNA-Met(cat)c[193686,193760]  
agcgggatggagaagtctggaatctcgtagcctcataagctaaaggtcg  
gtggttcaaatccacctcccgttc  
1-16tRNA-Glu(ttc)c[193781,193877]  
tctccgttcattacacggctaggatatcgcccttcacggctaggatc  
gcccttcacggcgagtagcacgggtcgaatcccgtagcgagaacca  
1-17tRNA-Met(cat)c[194416,194490]  
ggtgcattagctcagtggttagagctcgggttcatacggcgtcggcgt  
agttcaaatctaccatgcaccacca  
1-18tRNA-Phe(gaa)c[194703,194778]  
ggacctgtagctcagatggtagagcaccgattgaaaatccgggtgtcgt  
cagttcgatcctgaccgggcccacca  
1-19tRNA-His(gtg)c[194784,194859]  
gtgacggtagttcagttgtagaactccaggtgtgatcctggtatcac  
gggttcgaaacccgtccgtcacccca

1-20tRNA-Thr(tgt)c[194940,195013]  
 gctcttatagttcagtggcagaacaagtgattgtaaccattagacctca  
 gttcgattctgagttggagcacca  
 1-21tRNA-Ile(gat)c[195020,195094]  
 agtcccgtagctcagaggtagagcgccgtgctgataacgcggatgtggat  
 gggtcgataaccattcgggactacca  
 1-22tRNA-Asn(gtt)c[195770,195852]  
 ggaggtgtggctcaaaggtgagcggcagactgttaatctcgggtaata  
 accctatgttgggtcgagccaacctcctccgc  
 1-23tRNA-Leu(taa)c[199140,199223]  
 gtgggtatggcgtaatgttagccgcaggagactaaaatctcccgttc  
 tggcgtgtgggtcgagtcctccactaccgcacca  
 1-24tRNA-Leu(caa)c[199229,199313]  
 gggagattggcgtaatggcagccgcagtagattcaaatctaccgacga  
 aagtcgtaccggttcgagtcgggtatctctacca  
 1-25tRNA-Arg(tct)c[199406,199480]  
 cggggcgtagctcagttggatagagcatgtgccttctaagcacacggtcg  
 ctggttcgagcccagtcgcctcggc  
 >GU911519.1 Acinetobacter phage Acj61, complete genome  
 1-1tRNA-Trp(cca)c[79124,79194]  
 aggtcgctagtgaatggtagcagcgggctccaaccccgtaatcttc  
 gttcgaatcgaagcgattct  
 1-2tRNA-Phe(gaa)c[79201,79276]  
 gcacgagtaactcagttgtagagtggtgcctgaagagcagcaggtcac  
 atgttcgaatcatgtctcgtgcacca  
 1-3tRNA-Met(cat)c[79283,79356]  
 cgcgatatggtgtaaaggtgcacatagggtcataacccaaaggtcca  
 gttcgagctcggatcgcctacca  
 1-4tRNA-Gln(ttg)c[79363,79436]  
 tgtcgcatggtgaatggtagcaccacagaattgactctgttagtaaag  
 gttcgatcccttttgcgactcca  
 1-5tRNA-Pro(tgg)c[79527,79603]  
 ctctctatagggcagtcgtgtagcctacttcttttggaagaagatgtcg  
 ttggtcaaactcaactaggagacca  
 1-6tRNA-Ile(gat)c[79660,79735]  
 cgtcgagtagctcagttgtagagcaacggaccgataatccgcaggtcac  
 atgttcgaatcatgtctcgacgacca  
 1-7tRNA-Ser(tga)c[79736,79830]  
 ggtgaagtggcagagtcgtggttattgcagtagtcttgaaaactaccgtc  
 tcatagtatatggggccctgggttcaaactccagtttcacctcc  
 1-8tRNA-Asn(gtt)c[80035,80110]  
 tcctcagtagctcagttgtagagcagcagactgttaatctgtgggtcac  
 acgttcgatccgtgtctggggagcca  
 1-9tRNA-His(gtg)c[80144,80218]

tggaccatgggtgaatggtagcaccgcgatttggatgctgtagtctc  
agttcgaatctgtgtgtccaacca  
1-10tRNA-Glu(ttc)c[80227,80302]  
gctcttatcgtctagtcggttaggacgtcagcctttcacgttgaaaactc  
gggttcaagtcgccgataagagtacca  
1-11tRNA-Tyr(gta)c[80309,80394]  
ggggacgtaggaaaattggtaaccccatcggactgtaaatccgacgcaa  
aagcatctgtgagttcaagtctaccggccccacca  
1-12tRNA-Thr(tgt)c[80410,80481]  
tctggcatcatatagtggtattatgctggtttgtactccagtcaccgag  
tttcgattactcgtgccagaac  
1-13tRNA-Cys(gca)c[80595,80670]  
ggcgttggtagaatggttatacggcgattgcaaaccgctcgatgc  
aggttcgagtcctgttgacgcctcca  
1-14tRNA-Arg(tct)c[80679,80755]  
gtctcgtggccgagttggattaggcatcgtagtctattgcgactata  
tgagttcgaatctcatgcggggctcca

>FJ373894.1 Shigella phage phiSboM-AG3, complete genome

1-1tRNA-Ser(tga)[137688,137767]  
tggaggatgatggaagggtagacattccctgaggggatggcggcagccg  
ttgaaggttcgaatccttctcctccaacca  
1-2tRNA-Asn(gtt)[138197,138272]  
gacgatgtagttcagtcggtagaacggcggctgttaaaccgtatgtcgc  
aggttcaagtcctgccatcgtcgcca  
1-3tRNA-Tyr(gta)[138530,138613]  
gtgagtggtggcagagcggtcgaatgcaggagactgtaaatctccccgtaa  
cagcgcgggtggttcgaatccatccactcacacca  
1-4tRNA-Ser(gct)[138924,139012]  
ggaaggttccccgagaggttaagggactcgactgtaaatcgagtggggc  
tttagccccgaaggttcgaatccttcacctccgcca

>GQ981382.1 Shigella phage SP18, complete genome

1-1tRNA-Arg(tct)c[69216,69291]  
cgaggcatagctcagaaggaagagcaaggaccttctaagtcctaggtcgt  
aggttcgatccctactgtctcgacca  
1-2tRNA-Asn(gtt)c[69298,69370]  
ggatgcatagctcagtgtagagcagttgactgttaataattgtccat  
ggttcgaatccatgtgtgccgc  
1-3tRNA-Met(cat)c[69375,69449]  
ggcccttagctcaatgggagagctgtcagctcataactgataggtagct  
ggatcgaaaccagcaagggccacca

>HM004124.1 Acinetobacter phage Acj9, complete genome

1-1tRNA-Trp(cca)c[78801,78872]  
gggtcgatagtgtagttggaacactgcggattccaaatccgccatcctg  
ggttcgagtcctagtcggcgcc



1-2tRNA-Phe(gaa)c[78879,78954]  
ggggatttagctgagacagattagcgccctgaagagcaggattagat  
tggtgcaattccaatagtccccgcca  
1-3tRNA-Met(cat)c[78956,79030]  
ggtcattagctcagtggtagagcagaggattcatattcctcgtgcaca  
tggtcgaatcatgtatgcacctcca  
1-4tRNA-Met(cat)c[79037,79114]  
tgcgaagtattttcagtcctgtagaaaagagaggttcataacctcttatgc  
gctcgttcgaatcgggccttcgctcca  
1-5tRNA-Asp(gtc)c[79122,79197]  
agactattagctcaatcgggagagcactggcctgtcacgccagaggtagc  
gagatcgaaactcgtatagtctgcca  
1-6tRNA-Glu(ttc)c[79204,79279]  
gctctaactcgtctagttggacaggacgctagcctttcacgttagaaaccg  
gagttcgaatctccgttagagtacca  
1-7tRNA-Arg(tct)c[79288,79363]  
gcgtcattggccgagtggttaggcacggaattctagtcgactcacat  
gggttcgattcctatatggcgctcca  
1-8tRNA-Tyr(gta)c[79372,79457]  
ggtagtggtgggtgttggtcaaaccatcgactgtaactccgacgct  
aacgctatctaggttcgaatcctagcgtcaccacca  
1-9tRNA-Pro(tgg)c[79465,79543]  
ccgtgtgtgactggagcttggtatcagtccttgaggcgagaata  
cgtaggttcaaatcctaccgcacggacca  
1-10tRNA-Ile(gat)c[79603,79678]  
cgtcgaatagctcagttggtagagcaacggaccgataatccgcaggtcgc  
tggttcgaatccagcttcgacgacca  
1-11tRNA-Ser(tga)c[79684,79779]  
ggtagagtggcagagctcggcttattgctccggtctgaaaaccggcgat  
ccattgcaaaatgggtccgtgggttcaaatccacctctatctcca  
1-12tRNA-Asn(gtt)c[79787,79862]  
tcctcgatagctcagttggtagagcagcagactgttactctgtttgtccc  
acgttcgaaccgtggtcggggagcca  
1-13tRNA-Lys(ttt)c[79870,79945]  
tggacgttagctcagttggtagagcagaggatttttaacctaagggtcaa  
tggttcgaaccattacgtccaacca  
1-14tRNA-Thr(tgt)c[79955,80030]  
gccatcatagctcagttggtagagcagcggttttgaatccgaaggtcgt  
aggttcgattcctactgatggcacca  
1-15tRNA-Gly(tcc)c[81552,81628]  
gcggattagctcagttggttaagagcgtcgtcctccaagtcgaaagcca  
tcggttcgagtcgatatgccgctcca  
1-16tRNA-Cys(gca)c[81632,81707]  
agtcgatggcagaatggtcatcggttgattgcaaatccacgtcaatat

gggttcgagtcgccattcgacttcca  
1-17tRNA-Met(cat)c[81715,81790]  
gggcctttagctcaattggcagagcagcccactcataatgggttggttt  
cggttcgagtcggaaggccacca  
1-18tRNA-Pyl(cta)c[82721,82793]  
cgctcagtaggttagtggtagacttacagactctaaatctggatgcaacg  
gttcgaatccgttctgagtacc  
1-19tRNA-Tyr(gta)c[82816,82908]  
cggatgatgagctagttggttaagcttatgatgatgtacacatcatgaaa  
acgggtactcctgttgcacagttcgaatcgggtattatcgt

>HM071924.1 Enterobacteria phage IME08, complete sequence

1-1tRNA-Arg(tct)c[69402,69477]  
cgaggcatagctcagaaggaagagcaaggaccttaagtctgggtcgt  
aggttcgatccctactgtctcgcca  
1-2tRNA-Asn(gtt)c[69482,69556]  
ggatgtgtagctcagtggtagagcagttgactgtaataatgggtccat  
ggttcgaatccatgcatgtcccca  
1-3tRNA-Met(cat)c[69561,69634]  
ggcctgtagctggacggtcaagcagcgactcataatcgctggatggtg  
gttcgattccaccaggccacca

>HM134276.1 Enterobacteria phage RB16, complete genome

1-1tRNA-Met(cat)[49781,49857]  
ggccctttagcttaattggtagagcgggtgactcataatcgcgcggttg  
ctggttcgaatccagcagggccacca  
1-2tRNA-Gly(tcc)[49863,49938]  
gcaggtgtagttcaattggtagaatatctggttccatccagattgtga  
gggttcgagtccttcacctgtcca

>GU323318.1 Enterobacteria phage CC31, complete genome

1-1tRNA-Gln(ttg)c[69064,69137]  
tggggtatagccaagttggttaaggcagtagattttgattctacgattccc  
tggttcgagtcagggtacactagc  
1-2tRNA-Met(cat)c[69144,69220]  
tcggggttaacttcagttggtagaatgacgggtcatatcccgttacgcg  
atggttcgagtcacatcccccctcca  
1-3tRNA-Asp(gtc)c[69341,69416]  
ggacctatagtttcagcggtgaaaatactgcctgtcacgtgagagtcac  
gggttcgaatcccgttaggtccgcca  
1-4tRNA-Asn(gtt)c[69659,69743]  
gggtcgttggtgagagggttaagcggcgactgtaataccgtgtcagaaa  
tgactaggcaggttcgatactgcacgacccgcca  
1-5tRNA-Glu(ttc)c[69749,69823]  
tctccgttcgtctatcggttaggacgcccgtttcacgtcgaaagaag  
agttcaattctcttacggagaacca  
1-6tRNA-Lys(ttt)c[69825,69902]

aggacgtagctcagttggttagagcatccgacttttaacggaatgctg  
atgggttcaactccctcacgtcctacca  
1-7tRNA-Ile(gat)[69941,70016]  
gggaatatagctcagttggttagagcaaacgaccgataatcgttaggtcac  
tggttcgagtcagttattcccacca

>HM452125.1 *Aeromonas* phage phiAS4, complete genome

1-1tRNA-Leu(taa)[102155,102239]  
gcaagtatggtggaattggtataactggaggcttaaacctcccgcctt  
cgggattgtgggttcgagtcacctacttgcacca  
1-2tRNA-Ser(tga)[102431,102524]  
ggaagattggcccgagttggtttaaggcaccggtcttgaaaaccggcgat  
cgtaggaatacggatccatccgttcgaatcgatatcttctcca  
1-3tRNA-Asn(gtt)[102693,102775]  
ggtgatgtagcataacggtcatgcggccggctgtaaccggtgaggaaac  
tctacgttggttcgactccaaccatcacgcga  
1-4tRNA-Tyr(gta)[102789,102871]  
ggaacgttcgggtaatggtatcccaagcggctgaacccgctcgcctctg  
gcattcttggttcgagtcgaaggcgttcacca  
1-5tRNA-Lys(ttt)[103428,103503]  
gcatctctaactcaattggtagtagcggacctttaatccgtcaagtct  
gagttcgagtcaggggatgcacca  
1-6tRNA-His(gtg)[103793,103867]  
gtgacctagtagtaatggtagctatcctggatgtgacccaggagtagc  
ggttcgaaccccgtaggtcaccca  
1-7tRNA-Gly(tcc)[103880,103955]  
gcgggtaagggtttatggatacatgctagcctccaagcttgagtagac  
cggttcgataccggctacccgctcca  
1-8tRNA-Pro(tgg)[104200,104274]  
ctcagcgtaggcaagtgtgtatgtcgttcggttgggacggaatttcggg  
tgttcgattcaccccgctgagacca  
1-9tRNA-Thr(tgt)[104910,104985]  
gccggttagctcatctggtagagcacagccttctaaccgtggggtggt  
ccgttcgagtcggacaatcggcacca  
1-10tRNA-Trp(cca)[105350,105425]  
atgacattggtgttagcggtagcatgccggtctccaaaaccgtgcggcca  
gggttcgaatccttgatgtcatgcca  
1-11tRNA-Ile(gat)[105428,105503]  
agtggattagctcagtaggttagagcactcgaccgataatcgagagcgcat  
tggttcgatcccaatatccactacca  
1-12tRNA-Ser(gct)[105512,105599]  
ggagaagtggatgagcggctgaaatcgcttccctgctaaggaagtaaacc  
gaaaggtttcgagagttcaaattctctcttctccgcca  
1-13tRNA-Asp(gtc)[105677,105750]  
ggagccatagttatttggttaaaatagtcacctgtcacgggacagcacc

gagttcgatcctcggaggctccgc  
1-14tRNA-Met(cat)[105763,105839]  
tgcgatgtagaggaggtcgtcctcgtcgggctcatatcccgaatca  
gcggttcgaatccgctcatcgcttcca  
1-15tRNA-Met(cat)[106042,106116]  
ggccctgtagctagacggtcaagcaggcggctcataaccgctcgtagta  
ggttcgattcctaccagggtcacca  
1-16tRNA-Arg(tct)[106685,106761]  
ggctcttagctcagttggatagagcagcggccttctaagccgagggtca  
ttggtcaaataccaatagggactgcc

>HM032710.1 Acinetobacter phage Ac42, complete genome

1-1tRNA-Thr(tgt)c[79430,79505]  
tccgaattagctcagttggtagagcagtggtttgtaatccaaaggtcat  
ccgttcgagtcggatattcggaacca  
1-2tRNA-Trp(cca)c[79609,79682]  
aggctattggtgtaatggcagcacagcgggctccaacccgtagtcaga  
gttcaaatacttgggtggcctgcc  
1-3tRNA-Tyr(gta)c[79806,79891]  
gtgcatcgtcgggttgggtcaaaccagcggactgtaactccgccacg  
aaagttatctgtgttcgaatcacagggtgcacacca  
1-4tRNA-Ser(tga)c[79897,79987]  
ggaagagtaaaccaagtcggtctacgggtcgtgcttgaaaacagttg  
gtgtcacagccgtgtgagttcaagtctcacctcttcgccca  
1-5tRNA-Arg(tct)c[80411,80487]  
ccgctagtagctcagatggatagagcatccgcttctaagtggtgta  
ctggttcgagtcagtttagcggacca  
1-6tRNA-Met(cat)c[80657,80731]  
gggcctataactcaatagtagagtaccgatctcataaatcggaggattca  
ggagcgtaacctgttgggccacca

>HM563683.1 Enterobacteria phage vB\_EcoM-VR7, complete genome

1-1tRNA-Arg(tct)c[66571,66647]  
cggggtgtaactcaattgtatagtagcggctcctctaaaccgcaggtta  
aaggttagaatccttcaccccgacca  
1-2tRNA-Met(cat)c[66652,66726]  
ggccctttagctcaatgggagagctgtcagctcataactgataggtagct  
ggatcgaaaccagcaagggccacca

>GU071095.1 Synechococcus phage S-SM2, complete genome

1-1tRNA-Leu(taa)[22309,22394]  
tgggagcgtggcggaatcggtagacgcaccagacttaaatctgttgaga  
attatctcgtgggggttaagtcaccccgctcctat  
1-2tRNA-Thr(tgt)[22699,22772]  
gccaaactagctcagttggatagagcagggtttttaaagctcaggtca  
tcggttcaagtcgatagttggct  
1-3tRNA-Ala(tgc)[129310,129382]

ggggttatagctcaactggtagagcgctgcttgcacgcaggaggttg  
gggttcgagtcgccataactcca

1-4tRNA-Arg(tct)[140954,141029]

gactcagtagctcagttggatagagcaactgccttctaagcagtcggtcg  
taggttcgagtcctacctgggtcgcc

1-5tRNA-Gly(tcc)[141032,141103]

gcgggtgtggtgtagcggtaacatgcgagcctccaagctctgtcacgg  
gttcgatccccgtcacccgctc

1-6tRNA-Asn(gtt)[141254,141328]

ttctcagtagctcagcggcagagccgacgactgtaatcgtctggtcgt  
aggttcaaatcctacctggggagtc

1-7tRNA-Val(tac)[141330,141403]

tgcttgcttagctcagaggtagagcatctcgttacaccgagcggtcgg  
cggttcgatcccgctcagcaagcat

1-8tRNA-Ser(tga)[141678,141764]

ggaagagtggtcgagtggttatggcactggcttgaaaaccagcgaggg  
tgcaagttctccgtgggttcaaatccacctcttccg

1-9tRNA-Pro(tgg)[142214,142287]

cggggtgtagctcagttggttagagcactcgcttgggagcgagtgccg  
taggttcaaatcctatcaccccgga

1-10tRNA-Ile(tat)[142480,142553]

gggactgtcgctaacggttaagcccactgctataacggtgtgacctg  
ggttcaactcccagcagtcctacc

1-11tRNA-Met(cat)[142555,142629]

tggaggattagcaatctggtgaatgcagaaactcataattgcctaagg  
tgagttcgatcctcacatcctctat

>GU071099.1 Prochlorococcus phage P-RSM4, complete genome

1-1tRNA-Leu(taa)[22119,22203]

gggagtgtggcggaatcggttagacgcaccagacttaaaatctgttgggca  
tgtgcccgtgagagttcaagtcctctactcctac

1-2tRNA-Met(cat)[109227,109301]

tgagggtgtagcaatctggtgaatgcaccgaactcataattcggctaagg  
cgagttcgatcctcgccacccttat

1-3tRNA-Arg(tct)[165836,165910]

tgggacagtagctcagcggaaagagcaactgccttctaagcagtcggtcg  
taggttcaattcctacctgtctcgt

>GU071098.1 Synechococcus phage S-SSM7, complete genome

1-2tRNA-Gly(tcc)[151563,151633]

gcggatgtagttaatggtaaaatacaggttccaacctctgtcctca  
gttcgattctgagtatccgct

1-3tRNA-Ile(tat)[216422,216494]

gggactatcgcatattggttaatgccctctgctataacggagtgaaccg  
agttcaattctcggtagtcctac

1-4tRNA-Thr(tgt)[216497,216572]

gccactttagctcagttggatagagcaacgcatttgaatgcgtaggtcg  
tcggttcaagtcgacaagtggtcc  
1-5tRNA-Arg(tct)[216575,216650]  
gactcaatagctcagttggatagagcaactgccttctaagcagtcggtcg  
taggttcgagtcctacttgagtcgcc  
1-6tRNA-Leu(taa)[216652,216737]  
tgggagtggtggaatcggtagacacaccagacttaaaatctgttgaca  
gcaatgtcgtgggggttcaagtccccccactcccat

>FQ482083.1 Erwinia amylovora phage phiEa104 complete genome

1-2tRNA-Pro(tgg)[22026,22103]  
ctccgtttagctcagtatggatagagtaggccgttggggcggtcgggtc  
gaaggttcgaatccttcaacggagacca  
1-3tRNA-Ala(tgc)[22224,22296]  
gggtcagtagcttaattgggaaagcatctcacttgcaatgagaaggatga  
gggttcaagtccctcctgtatcc  
1-4tRNA-Met(cat)[22479,22553]  
agcgggatggagcagtggtagcttccagttcattatctggaggtcgtg  
ggttcgaatcctactcccgttcca  
1-5tRNA-Asn(gtt)[22562,22637]  
gggtttgaagcacatatggatgtcggctggctgtaaccagatggtagt  
gggttcgagtcacaccttcccacca  
1-6tRNA-Tyr(gta)[22644,22726]  
ggcctatggcagagatggatcaatgcagcggctgtaaaaaccgccccgaa  
aggttactggttcgagtcagttaggcgacca  
1-7tRNA-Met(cat)[22733,22806]  
tgcgaagtagtgaaatggcatcactggttcattatccggttaggca  
gttcgaatctgcccttcgcatcca  
1-8tRNA-Asp(gtc)[22886,22962]  
ggggatgtggcagacttggttaattgtaccgactgtctatgcggaatg  
agggttcaaatcccttcctcgcga  
1-9tRNA-Ser(tga)[23191,23281]  
ggaaggcgaaatcgactggcgacgaaaacggtcttgaaaaccgccgagcg  
ttaatagcgcttgagggttcgactcccttccttcgcga  
1-10tRNA-Phe(gaa)[23283,23357]  
ggtctaattagcttatatggtaaagcaacggtctgaaaagccgtggaaca  
gggttcgaatcccgatagaccgcca  
1-11tRNA-Lys(ttt)[23365,23440]  
cggtgtgtaactcaattggcagagtggtggctttaaccacagggttgc  
aggttcgatgcctgtcacaccgacca  
1-12tRNA-Lys(ctt)[23448,23524]  
ggactattaactcaactggtcagagtaccgactttaatcgggaggttc  
agggttcgactccctgatagctacca  
1-13tRNA-Met(cat)[23536,23609]  
agtggatggcagagatggatgcacttccttcatacgaagcctacat

cggttcaagtcgattaccacttc  
 1-14tRNA-Ile(gat)[23623,23697]  
 tgtgggtagcataaatggtaatgcaaacgcctgataagcgtagaagag  
 ggttcgataccctcacctacgacca  
 1-15tRNA-Gln(ttg)[23704,23779]  
 cggggataggagtaattggcaactctacggttttgaggccgtagttt  
 cggttcgaatccgaatgccccgccca  
 1-16tRNA-Arg(tct)[23786,23862]  
 gcacccttagaacaacggatagttcccctgtcttctaacagttagta  
 caggttcgaatcctgtaggggtgacca  
 1-17tRNA-Leu(caa)[24280,24356]  
 ggcgtaatatccaattggcagaggaagcaggttcaaaccctgttcagt  
 tgggttcgactcccacttacgctacca  
 1-18tRNA-Gly(tcc)[24487,24562]  
 gcaagtatgatgtcaactggtaacatggcgtcctccaagtcgctcttac  
 ggggtcgaatcccgttacttgctcca  
 1-19tRNA-Trp(cca)[24568,24643]  
 taggggattagtttaactggcaaaatgtcggcctccaaaaccgcacgttg  
 agggttcgaatccctcatcccctgtc  
 1-20tRNA-Thr(tgt)[24654,24728]  
 gcctccatcatataagggtattatgcctgtttgtaatcaggtcatcgc  
 ggttcgaatccgtgtgggggcacca  
 1-21tRNA-Val(tac)[24736,24811]  
 actcgtagctcagatggtagagcggcatctttacacgttgctggtcag  
 gcgttcgagtcgccttcgagtagacca  
 1-22tRNA-Leu(aag)[24818,24895]  
 ggctgtgtagcccaactggcagaggcactacgctaagaacgtatacagt  
 gagagttcgaatctctccacagctacca  
 1-23tRNA-Arg(acg)[24902,24978]  
 agccctttatcttaaatggatagagactcaagctacgaactgagaggt  
 tgggttcgaatcccaaagggttcca  
 1-24tRNA-Gln(ctg)[24981,25057]  
 aggatgttcgtatagttggcctattacaccggactctgaatccggttacg  
 atggttcgaatccatcacgtcctgcca  
 1-25tRNA-Leu(taa)[25064,25140]  
 aggtgattacccaattggcagaggtaggagctaaacctccgatgttg  
 agagttcgaatctctcatcacctacca  
 1-26tRNA-His(gtg)[25144,25220]  
 gaggttggtatcataaatggataatgaccctgactgtgaatcaggctctatg  
 cgggttcgaatcccgtccttctcccca  
 1-27tRNA-Ser(gct)[25227,25319]  
 ggaagattaaccctaaaaggtaagggaagtgttgctaaactcagtaa  
 ccgagaaatcggcgtagcagttcaagtctggtatcttctcca

>FQ312032.1 Salmonella phage Vi01 complete sequence

1-tRNA-Met(cat)[137231,137306]  
ggccccgtagctcagtggttagagcagtcgactcataatcgattggtcgc  
tggttcaagtcagccagggtcacca

1-2tRNA-Asn(gtt)[137626,137701]  
gacgatgtagttcagtcggtagaacggtagctgtaatccatatgtcgc  
aggttcaagtcctgccatcgtcgcca

1-3tRNA-Gln(ttg)[138089,138164]  
aggagcatagccaagttggttaaggcagtggtttgatcccatgatctc  
aggttcaaatcctgatgttccttcca

1-4tRNA-Tyr(gta)[138314,138395]  
gtgagtggtggcagagcggtcgaatgcgcctgactgtaaatcaggtatccc  
acgcggtggttcaaatccatccactcacacca

1-5tRNA-Ser(gct)[138472,138560]  
ggaaggtgcccagaggtttaagggactcgactgtaaatcgagtggggc  
tttagccccgaaggttcgaatccttcaccttcgcga

>AP011617.1 Thermus phage TMA DNA, complete genome

1-tRNA-Thr(tgt)[51806,51881]  
ggcctcgtagctcaacaggaagagcacccgccttgaagcggggggtgt  
gggttcaaatcccaccgggcctcca

1-2tRNA-Met(cat)c[119137,119213]  
ggggcgtagctcaagcggtagagcggtagctcataaccgattggttg  
taggttcgagtcctacacccccacca

1-3tRNA-Arg(tct)c[119226,119302]  
gaggggttagctcaacaggatagagcaaggccttctaagccctaggttg  
caggttcaagtcctgcacccctcgcca

>HM114315.1 Acinetobacter phage 133, complete genome

1-tRNA-Trp(cca)c[65864,65935]  
gggtcgtagttagttggaaacactgcggattccaaatccgcatcgag  
ggttcgagtccttcacggcgcc

1-2tRNA-Met(cat)c[66679,66754]  
ggtagtttagctcagtagtagagcagcggaatcataatccgtaggtcgg  
tggttcgagtcaccaattaccacca

1-3tRNA-Met(cat)c[66755,66831]  
tgcgaggtaactcagcctggtagaatgagaggctcataacctcttacgc  
gcacgttcaaatcgtcctcgttcc

1-4tRNA-Asp(gtc)c[66937,67012]  
agattcgtagctcaatcggaagagcacccgcctgtcacgaggaggtagc  
gggatcgaaacccgtcgggtctgcca

1-5tRNA-Gln(ttg)c[67251,67324]  
tgtcgcatggtgaacggtagcaccacagaattgactctgtagtaaag  
gttcgattccttttgcgactcca

1-6tRNA-Pro(tgg)c[67417,67493]  
ctctcattagggcagtcgtgtagcctacttctttggaaagaagatgtcg  
ttggttcaaatccaacatgggagacca



1-7tRNA-Ile(gat)c[67500,67575]  
 cgctcagtagctcagttggttagagcatcggaccgataatccggtggtcgc  
 tggttcgaatccagcctcgacgacca  
 1-8tRNA-Ser(tga)c[67825,67916]  
 ggtaaggtggcagagtctggcttattgcggtggtcttgaaccactgac  
 gctttcgggcgtccctgggttcgaatcccagttctacctcca  
 1-9tRNA-Asn(gtt)c[68224,68299]  
 tcctcagtagctcagttggttagagcgacgcactgttactgcgttggcgt  
 acgttcgaaccgtacctggggagcca  
 1-10tRNA-Thr(tgt)c[68306,68381]  
 gccgttatagctcagatggttagagcaggcgatttgaatcgtcaggctct  
 gggttcgaatcctagtgcgcacca  
 1-11tRNA-Glu(ttc)c[68383,68458]  
 gttcatatcgtccagcggcttaggacgccagcctttcacgttggtaaccg  
 gggttcaatccccgtatgaacacca  
 1-12tRNA-Tyr(gta)c[68460,68544]  
 gagtgtgtaggaaaattgtaaccccagcggattgtaaatccgccccgc  
 aagcactgaccgttcgactcggctccacactcgcca  
 1-13tRNA-Arg(tct)c[68572,68647]  
 ccctctctggccgaatggattagcgcgtgttctattgcgattatac  
 aggttcgagtcctgtgaggggtcca  
 1-14tRNA-Cys(gca)c[69475,69550]  
 ggtgtcatggtagaatggtcatacggcggattgcaaatccgcgtcgatac  
 tggttcgagtcagttgacacctcca  
 1-15tRNA-Gly(tcc)c[69656,69731]  
 gcggttgtaactcagatggttagagtgtgtcctccaagtcagatgtcgc  
 gatttcgaatctcgtcaaccgtcca  
 1-16tRNA-Met(cat)c[69740,69815]  
 gggcctatagctcaattggcagagcagcggactcataatccgttggtttc  
 aggttcgagtcctgctgggccacca

>GU071096.1 Synechococcus phage S-ShM2, complete genome

1-1tRNA-Arg(tct)[164009,164081]  
 gggtcagtagctcagttgtagagcatcgcacttctaagcgttggtcgg  
 gggttcaatccctcctgacccg

>GU071097.1 Synechococcus phage S-SSM5, complete genome

1-1tRNA-Val(tac)[15313,15384]  
 gggagaatagctcagcggtagagctactcgtttacaccgagtcggtcggg  
 ggttcgatcccctcttctcca  
 1-2tRNA-Leu(taa)[19381,19468]  
 tgggagtggtggcgaatcggtagacgcaccagacttaaaatcgttgaga  
 attaatctcgtgggggttcaagtcacccctcctatc  
 1-3tRNA-Thr(tgt)[19469,19542]  
 gccacttagctcagctggatagagcaacggtttgtaaaccgtaggtcg  
 tcggttcaagtcgacatgtggt

1-4tRNA-Arg(tct)[161698,161772]  
tgggtcagtagctcagcggatagagcaactgccttctaagcagtcggtcg  
taggttcgatccctacctgacccgt  
>KC862297.1 Pseudomonas phage PAK\_P1, complete genome  
1-1tRNA-Gln(ttg)[90515,90588]  
tgccgcttcgttcaatggtaggacgccagactttgaatctggagatgatg  
gttcgatcccatcagtggtgccca  
1-2tRNA-Arg(tct)[90895,90969]  
gctcgtatagttaatggatgcacaacggtcttctaagccgtaaggtcta  
ggttcgagtcctagtagcagcgcca  
1-3tRNA-Lys(ttt)[90979,91054]  
tggacggaagctaaagtggatagggcatctggcctttaaccagactatagt  
gagttcgagtctcaccggtccaacca  
1-4tRNA-Leu(tag)[91329,91413]  
ggccctgtggtggaattggtatacacatcagtcctagaactgacgccga  
gaggattgaggggtcaagtcctccggggccacca  
1-5tRNA-Ile(gat)[91624,91699]  
agccgggtagctcaattggtagagcaccgaccgataatcggtggttga  
aggttcaagtccttctctggctacca  
1-6tRNA-Asp(gtc)[91709,91787]  
ggcccatagctcagtcctggactagagcaagcccctgtctagggcaaggt  
cgtcgggtcgaatccgacatgggtcgcca  
1-7tRNA-Cys(gca)[92198,92273]  
cccgcgttgccgagaggtttaggcggcgattgcaaatccgtctcacat  
cggttcaaatccgatacgcggctcca  
1-8tRNA-Asn(gtt)[92282,92356]  
tgggatgtagctcagtggttagagcagggagctgttaactctcaggtcgca  
ggttcgagccctgccgtcccagcca  
1-9tRNA-Pro(tgg)[92420,92497]  
ctcctcgtagctcagtcctggtagagtgtctgattggaatcagaaggtc  
gaaggttcaaatccttcggggtgacca  
1-10tRNA-Gly(tcc)[92504,92579]  
gcgggtatagctcagttggttagagcgtctgcctccaagcagttcgtcgt  
cggttcaagtcctctatccgtcca  
1-11tRNA-Phe(gaa)[92586,92661]  
gcatttgaagctaactaggtagaagcgtcgggtgaaattccagaggact  
tggatcgttaccagcagatgcacca  
1-12tRNA-Glu(ttc)[92668,92743]  
gcagttatagattaattggttaaatgccagactttcaatctggtgttcc  
gggttcgatccccggttaactgctcca  
1-13tRNA-His(gtg)[92804,92878]  
gtggagattgtgtagcccgatgctgccttccggtgtgacccgattgtt  
ggggttcgagtcctccctcaacc  
1-14tRNA-Thr(tgt)[93065,93139]

gccctttaagcatttatggatgcaccggcttgaacccggcgaattc  
tgttcaagtcaggaatggggcacca

>HM242243.1 Brochothrix phage A9, complete genome

1-1tRNA-Arg(tct)c[25601,25676]  
tgccccggttaactcaaacggatagatataaaacttctaattgaaagt  
acaggttcgagtcctgttcggggcat  
1-2tRNA-Arg(cct)c[25761,25832]  
gcctttgtagtttaacggataaaacagaccctcctaagggttagctaga  
ggttcgattcctctcaaggga  
1-3tRNA-Lys(ttt)c[26744,26818]  
agataaggttagctcaattagtagagcaggagcctttaagccccagata  
taggtgcaaaccctatcctgtttt  
1-4tRNA-Met(cat)c[26848,26920]  
ggacccttagctcagttggttagagccccctgctcataacagggttgcgt  
aggttcaagtcctacagggtcca  
1-5tRNA-Met(cat)c[27656,27728]  
cgaggagtagagaagtggatcatctcaccagcctcataagctgggaatcga  
gggttagagtccttcctcctcaa

>AB472900.2 Pseudomonas phage KPP10 DNA, complete genome

1-1tRNA-Asn(gtt)[83391,83467]  
tccgttcggccctcaagtgaggagcctgactgttaatcaagacgtgc  
ctggttcgattccaggagcggagcca  
1-2tRNA-Tyr(gta)[83525,83612]  
ggaggggtggcagagcggtttaatgcaccggactgtaaatccggcgtccg  
accgggcatcgctggttcaaatccagccccctccacca  
1-3tRNA-Gln(ttg)[83814,83890]  
aggcgtgtggcgaaggtttaacgcactggactttgactccagcatttg  
tgggttcgaatcccaccacgtctgcca

>HM035025.1 Shigella phage Shf12, complete genome

1-1tRNA-Arg(tct)c[67981,68057]  
cgaggcatagctcaattgtatagacaacggacttctaatacgtgggttg  
aaggttagaatccttctgtctcgacca  
1-2tRNA-Asn(gtt)c[68062,68136]  
ggatgtgtagctcaatggcagagcgtcgcctgtaagcgattggttata  
ggttcgaatcctatcacgtccgcca  
1-3tRNA-Tyr(gta)c[68141,68227]  
ggggagttatcccgtagaggtagcgggtggactgtaaatccattgtcat  
tgcgactcgggtggttcgactccatcactccccacca  
1-4tRNA-Met(cat)c[68237,68311]  
ggccctgtagctggaaggttcaagcaagcactcataatcgccagatggt  
ggttcaattccaccagggccacca  
1-5tRNA-Thr(tgt)c[68313,68388]  
gctgatttagctcagtaggtagacacctcacttgtaatgaggacgtcgg  
cgggttcgattccgtcaatcagcacca

1-6tRNA-Ser(tga)c[68390,68478]  
tggaggcgtggcagagtgggttaatgcaccggcttgaaaaccggcagtc  
gctccggcgactcataggtcaaactctatcgctccgt  
1-7tRNA-Pro(tgg)c[68479,68553]  
ctccgtgtagctcagtttggtagagcgtctgctttgggagcagaatgtcg  
taggttcaaactcctgccacggagac  
1-8tRNA-Gly(tcc)c[68564,68637]  
gcggatatcgataatggcattacctcagacttccaatctgatgatgtga  
gttcgattctcattatccgctcca  
1-9tRNA-Leu(taa)c[68643,68729]  
gcgagaatggccaaattggtaaaggcacagcacttaaaatgctgcggaat  
gatttccttgtgggttcgagtcctcctcgcacca  
1-10tRNA-Gln(ttg)c[68730,68803]  
tgggaattagccaagttggaaggcactggattttgattccaggatgcaa  
aggttcgagtcctttattcccagc

>HQ615693.1 Synechococcus phage S-CRM01, complete genome

1-2tRNA-Leu(taa)c[88543,88618]  
tgccggtgtagcccaatggtaggagcagctgatttaagcccagcccagt  
gcaagttcgagcttgtcaccggtat  
1-3tRNA-Met(cat)c[88642,88716]  
tgctcgtttagctatctggtgaaagcagcgaactcataattcgctcagg  
tgggttcgatccctcaacgagcat  
1-4tRNA-Gly(tcc)[127547,127619]  
gcgacgtagttcagcggtagaacgctatcctccaagttagatgtcgct  
ggttcaaactccagtcggtcgctc  
1-5tRNA-Arg(tct)[127623,127698]  
gccctcgtagttcagcccggatagaacaccgcacttctaatacggttgtc  
gtaggttcaaactctaccgaggggtc  
1-6tRNA-Lys(ttt)[128952,129026]  
tgggttcgtagcaatgtggccaactgcaccggcttttaaccggagtatg  
tgggttcgattcccaccggacctat  
1-7tRNA-Pro(tgg)[129165,129236]  
cggggtgtggctcagaggtagagcgttgtttgggaacaagacgtcgca  
ggttcgatccctgccatcccga  
1-8tRNA-Tyr(gta)[129535,129620]  
gggtgtatggcaactattggtatgttcggtgtctgtaaaacaactgtc  
cctgactattggaggttcgattcctcttgcgccac  
1-9tRNA-Gly(gcc)[130519,130591]  
gcgaatgtaattcagtggtagaatgtctgcttgccaagtagattgtcgtc  
ggttcaaactccgatcattcgctc  
1-10tRNA-Asp(gtc)[130857,130931]  
ggtcctgtagcatagtggtctaatacactaccctgtcacggtaggttacg  
tcggttcaaactccgatcaggatcgc  
1-11tRNA-Trp(cca)[130984,131056]

tgccatgttcgtctaataaggtaagacaagagcttccaaacctcttgacgtg  
ggttcgattcctacactgggtgt  
1-12tRNA-Asn(gtt)[131716,131787]  
tggcatgtagttcagcggtagaacgcttggctgttaaccaagttgctgca  
ggttcgatccctgccgtgccag  
1-13tRNA-Glu(ttc)[131866,131942]  
gctccagtagacaaattggtaaagtcgcctctcttcaaagaggacattt  
tgcgagttcgaggctcgtctggagttc  
1-14tRNA-Glu(ctc)[132042,132116]  
tacagtcacgcactagcggctaggtcgctaccctctcaagtggaaca  
ccagttcaaatctggttggctgtat  
1-15tRNA-Pro(tgg)[134674,134748]  
ccgggtgtagctcagtttggccagagcattccgttggggcggaggggtc  
agaggttcaaactcctctcactcgga  
1-16tRNA-Pro(tgg)[134812,134885]  
tctgcatgggagctctggaactccgggcctggcgcccgagacgt  
tggttcaaatccaacatgcaggtc  
1-17tRNA-Ile(gat)[134944,135015]  
ggagatatagctcaacggcagagcaaccggccgattaccggatgatgaga  
gttcgactcttctatctctac  
1-18tRNA-Ile(gat)[135054,135129]  
taggaacatagcatagtgccctaatgcacacggctgataaccgtgagatc  
gtcagttcaaatctgactgttcctat  
1-19tRNA-Phe(gaa)[135201,135274]  
gggaactagctcagttgcgtagagcacttgggtgaagcccaaggtgtcg  
tcggttcgattccgtcagttcca  
1-20tRNA-Ala(tgc)[135312,135386]  
tggggtcttagcacaactggtagtgcattgctttgcaagcaataggta  
ggggttcgagtccttagattccat  
1-21tRNA-Val(gac)[135761,135834]  
taggtccataactcagcggcagagtgctacctcgacacggtagaagtcgt  
cagttcaatcctgactggacctat  
1-22tRNA-Ser(gct)[136579,136664]  
ggaagtgtggcagagcggctaattgcagttgttgctaaacaaccgggct  
aataaccacacaggttcaaatcctgtcacttccgc  
1-23tRNA-Ser(gga)[136667,136760]  
tggtagttgtccgagaggcttatggtcgatcttgaaagatcgtgtgt  
gagattgtatcaagcaccagaggttcaaatccttactcacgt  
1-24tRNA-Met(cat)[139590,139660]  
ggctctatagttcaacggcagaaacaggagattcataccctccatatggaa  
gttcaattctcctagagtca  
1-25tRNA-His(gtg)[139662,139738]  
gtgtaggtagaataattggttaattcaccagcctgtgaagctggtttatg  
cgagttcaagtctcgtcctacaccca

1-26tRNA-Thr(ggt)[139738,139811]  
 agcccgcatagttcagaggcagaacccaacttggttaagttggaagtcgt  
 gattcaattctcactgtgggctt  
 1-27tRNA-Thr(tgt)[141268,141341]  
 gctgatgtagctcaatctggcagagcaggtaccttgaagtatcaggtg  
 cgggttcaattcctgtcatcagct  
 1-28tRNA-Ser(tga)[141517,141587]  
 tctggagtcgtctaattggcaggacacggcgcttgaacgcttcaatgtgg  
 gttcgatccctacctccagaa  
 1-29tRNA-Lys(ctt)[141838,141913]  
 tgggtgtgtaactcaattaggcagagtagctggctcttaccagtaagtt  
 gcaggttcgattcctgtcacacccat  
 1-30tRNA-Cys(gca)[142050,142123]  
 gtctcagtcgccaagtgccctaaggctctggattgcaaaccagttattcg  
 tcggttcaaatccgacctgagact  
 1-31tRNA-Leu(caa)[145010,145084]  
 gcccggtgtagcgcaattggtaggagcagcacattcaaacgtgcacagt  
 gtgggttcaaatccctccacgggta  
 1-32tRNA-Ile(tat)[145590,145679]  
 ggggggtatgatgtatggagcatcgtggggtttatattccaagcgcaccc  
 gattagtcccgtgttagggttcgattccctatacccctac  
 1-33tRNA-Arg(acg)[149226,149301]  
 gcccgattagctcagaggacagagcacttggctacgaaccaaggttatgc  
 gtaggttcgactcctacatcgggtgc  
 1-34tRNA-Ser(tga)[149328,149413]  
 ggaaggccaagccgatgggtgacggcaactgtcttgaaaacagtcgagtg  
 taaaagccttgggagttcgactctccgtcttccgc  
 1-35tRNA-Met(cat)[149448,149521]  
 tgcgggatagagcagtcctggtagctcatcagtcataagctgaagatcg  
 gtggttcaaatccacctccgcct  
 1-36tRNA-Leu(gag)[149554,149627]  
 gccgatgtaacccaactggcagaggtagatgtatgagatgcattcagtg  
 cagggtcaaatcctgtcatcggta  
 1-37tRNA-Val(tac)[149711,149784]  
 tgggagcataactcagtggttagagtcctgttttacacgcaggcagtcgg  
 ggggttcaaatccctctgtctctat  
 >HQ259103.1 Salmonella phage SFP10, complete genome  
 1-1tRNA-Met(cat)[137450,137525]  
 ggccccgtagctcagtggttagagcagtcgactcataatcgattggtcgc  
 tgggtcaagtccagccagggtcacca  
 1-2tRNA-Asn(gtt)[137939,138014]  
 gacgatgtagttcagtcggtagaacggcggtctgttaaacgtatgtcgc  
 aggttcaagtcctgccatcgtcgcca  
 1-3tRNA-Ser(gct)[138683,138771]

ggaagggtgcccgagaggtttaagggactcgactgctaatacgagtggggc  
 ttttagccccgaagggtcgaatccttcacctccgcca  
 >GU459069.1 Aeromonas phage 65, complete genome  
 1-1tRNA-Leu(taa)[107957,108041]  
 gcttgtgtggtggaactggtatacacattagacttaaaatctaacgcctt  
 cgggattgggggtcgaatccccccacaagcacca  
 1-2tRNA-Arg(tct)[112203,112279]  
 gcgctgttagctcagttggatagagcaacgttcttctaagcgtgggtcg  
 ctggttcgaatccagcacggcgacca  
 1-3tRNA-Leu(tag)[112286,112369]  
 ggggatgtggtgaaattggcagacacaccagatttaggttctggcgctta  
 tagcgtgacggttcgagtcgcatccccacca  
 1-4tRNA-Gly(tcc)[112478,112553]  
 gcgggtgtagctcagttggtagagcttctgattccaatcagaatgtcgc  
 gtgttcgagtcacgttaccgcacca  
 1-6tRNA-Met(cat)[112642,112719]  
 ggccccatagctcagttggttagagcgtccgactcataatcgggtggtc  
 actggttcgagtcagttggggccacca  
 1-7tRNA-Met(cat)[113178,113253]  
 tgcgagttggagaagtggatcatctcgacaggctcattacctgtagtcgg  
 ttgttcgaatcaaccactcgcaacca  
 1-8tRNA-Asn(gtt)[113260,113335]  
 gggcgtgtagttccagcggtagaacgatggactgtaatccatgtgtcgg  
 ggggtcgaatccctccacggccacca  
 1-9tRNA-Ser(tga)[113465,113558]  
 ggaaggtcaacccgacggtaggcgacgggagcggctttaaaccgcca  
 ggcgtaacagcgcttgtgagttcgatcctcacatctccgcca  
 1-10tRNA-Lys(ttt)[113568,113643]  
 gcatcgtagctcagcaggtagagcatgggacttttaatctcagggtcgc  
 tgggtcgaatccagcacgatgtacca  
 1-11tRNA-Tyr(gta)[113650,113733]  
 ggatgcataggcaaatggttaagccagcggctgtaaaaccgtagccttc  
 gggcttcttgggtcgaatccaagtgtatccacca  
 1-12tRNA-Trp(cca)[113740,113814]  
 aggtctatggtgtagtggtaacatgccgattccaaatccgtgcgtctgg  
 ggttcaagtcctcatggcctgcca  
 1-13tRNA-Ala(tgc)[113820,113896]  
 gggggattagctcagttggaatgagcagctggttgaaccagtaggtca  
 tcggttcgacccgatatcctccacca  
 1-14tRNA-Pro(tgg)[114340,114417]  
 ccgtgttaggctaggcaggtcaagtcgtctgtttgggaccagaagatc  
 gaaggttcgaatccttcacacggacca  
 1-15tRNA-Thr(tgt)[114991,115066]  
 gccgaattagctcatctggtagacacagccttgaacgctggggtggt

ccgttcgagtcggacattcggcacca  
1-16tRNA-Ile(gat)[115079,115154]  
agtggattagctcagtaggtagagcactcgaccgataatcgagagcgcat  
tggttcaacccaatatccactacca  
1-17tRNA-Ser(gct)[115161,115248]  
ggagaagtggatgagcggcttaaatcgctcccctgctaaggagtaaacc  
ggaaggtttcgagagttcgaatctctccttctccgcca  
1-18tRNA-Asp(gtc)[115256,115331]  
gaggatgtagtatagtggtcaatatccctgcctgtcacgtaggagatcgc  
gggttcgagtcgccgtcatcctcgcca

>GU071094.1 Synechococcus phage S-SM1, complete genome

1-1tRNA-Val(tac)[15012,15085]  
tgggagattagctcagcggtagagctattcgtttacaccgaatcggtcac  
tggttcgattccagtatctcccat  
1-2tRNA-Leu(taa)[18953,19039]  
tgggagcgtggcgggaatcggtagacgcaccagacttaaaatctgttgaga  
attaatctcgtgggggttcaagtcctccctcctat  
1-3tRNA-Thr(tgt)[19409,19485]  
gccacttagctcagctggatagagcaacggtttgtaaaccgtaggtca  
acggttcaagtcggttgagtggctcca  
1-4tRNA-Ala(tgc)[19486,19558]  
ggggaattagctcaattggtagagcacctgcttgcacgcagggggttag  
cggttcgagtcgcgtattctcca  
1-5tRNA-Asn(gtt)[19607,19680]  
ttcctcttagctcagcggtagagcgggtgactgttaatcaattgtccc  
tggttcgatcccaggaaggggagt  
1-6tRNA-Gly(acc)c[74450,74541]  
ggggtagttaaactaatggagaggttcgtgccgttaccaatggcaccata  
aatctcattaaagtgtcattgatcttatcgccgccagcacg  
1-7tRNA-Arg(tct)[160615,160689]  
tgggtcagtagctcagcggatagagcaactgccttctaagcagttggtcg  
caggttcaaatcctgcctgactcgt

>GU071106.1 Synechococcus phage Syn19, complete genome

1-1tRNA-Val(tac)[17789,17861]  
gggcgaatagctcagcggtagagctactcgtttacaccgagtcggtcggg  
ggttcgatcccctcttcgcccac  
1-2tRNA-Leu(taa)[22314,22400]  
tgggagtggtggcgggaatcggtagacgcaccagacttaaaatctgttgaga  
attaatctcgtgggggttcaagtcctccctcctat  
1-3tRNA-Thr(tgt)[22402,22473]  
gcccttatagctcagtggtagagcaacgctttgtaaagcgtaggtcgtt  
ggttcaaatccgactgggggct  
1-4tRNA-Ala(tgc)[22476,22549]  
ggggaattagctcagttggtagagcgctgcttgcgaagcaggatgtcag



gagttcagagtctcctattctccac  
1-5tRNA-Asn(gtt)[22554,22625]  
tcctctttagctcagcggtagagcggttgactgttaatcaattggccct  
ggttcgatcccaggaaggggag  
1-6tRNA-Pyl(cta)[163912,163986]  
tgggtcagtagttcagcggatagaacaacgctcttctaagcgtgtgtcg  
ggggttcgattccctcctgacccgt

>GU071103.1 Prochlorococcus phage P-SSM7, complete genome

1-1tRNA-Ile(tat)[117038,117109]  
gggactatcgcatattggtaatgccactgcttataacggtgtgaaacg  
ggttcaattcccgttagtccta  
1-2tRNA-Arg(tct)[117112,117186]  
tgactcagtagctcaaaggatagagcaattgccttctaagcaattggttg  
taggttcgagtcctacctgagtcgt  
1-3tRNA-Leu(taa)[117189,117261]  
gggagtgtagtccaacggcagagacaggagactaaaatctctacagtgt  
gggttcgaatcccaccactccta  
1-4tRNA-Asn(gtt)[118123,118209]  
ttgtgaggtggcgaacggtaaagcgtctagtctgttaactagtgtctc  
tggcgggactttaggttcgactcctaccctcacagt

>FQ482085.1 Erwinia tasmaniensis phage phiEt88 complete genome

1-1tRNA-Phe(gaa)[44731,44806]  
ggaactctggcgtaggtggttcgcgcggatgtctgaaaaacctcaggaac  
tggttcgattccagcgggtccacca

>GU296433.1 Campylobacter phage NCTC12673, complete genome

1-1tRNA-Tyr(gta)c[85876,85960]  
gtagaagtaggataattggaatccaccagactgtaaactggcgtcttt  
tggcattgatggttcaagtcacatccttctacacca  
1-2tRNA-Asn(gtt)c[85979,86053]  
tcgagattagcacagcggtagtgcaatcgactgttaatcgatgagtcaga  
ggttcgaatcctctatctcgagcca  
1-3tRNA-Met(cat)c[86147,86221]  
gggcgagtagctcaatggtagagcaaccggctcataaccggttggttata  
ggttcgattcctgtttcgcccacca

>GU070616.1 Salmonella phage PVP-SE1, complete genome

1-1tRNA-Ala(ggc)c[62894,62975]  
tgcgtggtagtgaacggatataagatcatgttgccctcataagccgaa  
gattgcgggttcgactcccgtcacgcatcca  
1-2tRNA-Phe(gaa)c[62982,63057]  
gggggttgaactcagttggtagagtcctgcctgaagagcagatggtcgg  
tggttcgagtcacccggccccacca  
1-3tRNA-Val(tac)c[63065,63139]  
gcttccttagttcaatggtagaacgtgtctttacacggcaagcgtcgg  
ggttcgattccatcaggaagtacca

1-4tRNA-Leu(tag)c[63147,63223]  
gggcgattgatggaattggtatacgtgccgtccttagaagtcggattttg  
ggggttcgagtcctcgtcgccacca  
1-5tRNA-Ala(tgc)c[63330,63408]  
ggggaatgggtctgcttgagtgacacctcgttgcaccgaggatatca  
gaagagttcgaatctcttattctccacca  
1-6tRNA-Arg(acg)c[63412,63487]  
gcaggtatagttcaactggacagagcatcagcctacgaagctgagaatcg  
gggttcgaatccctgtactgcacca  
1-7tRNA-Pro(tgg)c[63675,63750]  
cagtcgtagcgcagttggtagcgtgggagccttgatgcttcgggtcgc  
aggttcgagtcctgccgggctgacca  
1-8tRNA-Asp(gtc)c[63848,63924]  
ggggccgtggctgacaagtaattggtccgcactgtctatgcggaaaatg  
agggttcgatccccttcggcctcgcca  
1-9tRNA-Asn(gtt)c[63932,64016]  
gacgagttggcctagtgttgggcgacggcctgtaagccgtgagtga  
actcaaggaaggttcaaatcctcactcgtcgcca  
1-10tRNA-Lys(ttt)c[64081,64163]  
gggtctgtagccaagtgtgacgcaagtgaaggcatccgactttaatc  
ggaggatcgggggttcgaatccctccagaccacca  
1-11tRNA-Ser(tga)c[64170,64255]  
ggagagtgccgtccaacgggtggacaagcaggttgaaccctgtggtgctg  
gaaacgtaggggttcgattcctccactctcctcca  
1-12tRNA-Ser(gct)c[64257,64350]  
ggaagattaaccctaatacagtaaggatctcttgcctaaagagacagta  
gccccgaaaggggtgtcagttcaagtctgacatctcctcca  
1-13tRNA-Ser(gga)c[64356,64445]  
ggagaagcaaatcgacagtgacgaaaacaccttggaaggtgctgactg  
gtaaaacggcttgagagttcgattctctccttccgcca  
1-14tRNA-Gln(ttg)c[64559,64635]  
agggggttagcatagctggcctaatacgcagggcttgaactcgacatcg  
gaggttcgaatcctccacccctgcca  
1-15tRNA-Glu(ttc)c[64725,64801]  
gtcctgttagacaaactggtaaagtcaccacccttcaagtggggtttg  
cgggttcgatccccgcacaggacgcca  
1-16tRNA-Gly(tcc)c[64809,64882]  
gcgctattagtgtagcgtccagcatccgccttccaagtcggtggca  
tcggttcgaatccgatatgacgt  
1-17tRNA-Ile(gat)c[64890,64965]  
gggagtatagctcagttagtagagcgtcgaccgataatcgagaggtcgc  
aggagcaaagcctgctactccacca  
1-18tRNA-Tyr(gta)c[64973,65056]  
ggctcattggcagaacggtgattgcagcggattgtaaatccgtgcccttc

ggggttcctggttcgaatccagggtgggccacca  
1-19tRNA-Cys(gca)c[65709,65782]  
gcactgttgctggagtggaacagcttcgtctgcaaacgaatgctggtg  
gttcgattccctcacagtgtctca  
1-20tRNA-Arg(tct)c[65784,65858]  
cggggcatagctagcggataggcaggagcttctaaactcctttacgcg  
ggttcgaatcctgctgcctcgacca  
1-21tRNA-Leu(taa)c[65866,65951]  
gcaggtgtggtggaatggagatacacaggagactaaaatctcccgtt  
aatgattacgagttcgagtctgtcacctgcacca  
1-22tRNA-Ile(gat)c[66926,67001]  
tcctcgtagctcaagttggtagagcagtcaccaagattcgggataagcac  
aggttcgattcctgtacgaggagcca  
1-23tRNA-Thr(tgt)c[67008,67082]  
gctcctaaagcataagtggtgatgcagcggccttgaagccgaagaagtg  
ggttcgattcctactgggagcacca  
1-24tRNA-Lys(ctt)c[69196,69271]  
ggggattaacacagcggtagttagcggcctctaagccgaaggtcga  
aggttcgaatcctcatgccccacca  
1-25tRNA-Met(cat)c[69964,70040]  
ggttctgtagcttagttggttagagcgtccctcataaggaagaggtcg  
caggttcaattcctgccagaactacca

>JQ691612.1 Cronobacter phage CR3, complete genome

1-1tRNA-Thr(tgt)[144372,144447]  
gctggattagctcagtaggtagagcgctcacttgaataggatgtcgc  
gggttcgattcctgcatccagcacca  
1-2tRNA-Cys(gca)[144454,144530]  
gcaacgttgccggagcttggaacggctctcgctgcaaacgagatgagca  
ctggttcgaatccagtacgttgtctca  
1-3tRNA-Leu(caa)[144532,144608]  
gcgtctttggtccaattggttagaggcactacattcaaatgtaggggttc  
ccagttcgaatctgggaaggcgcacca  
1-4tRNA-Ser(gga)[145443,145537]  
agtaggatggctgagtggttaaagcagcatcttgaaaggtgtcggatc  
aggtaacccttggtcccggagttcaaatctccctcctactgcca  
1-5tRNA-Lys(ttt)[145604,145680]  
ggatcgtagctcaattggttagagcaagggacttttaatcccagggttc  
ggggttcgagtcctgacgggtccacca  
1-6tRNA-Asn(gtt)[145846,145921]  
tgacggtgagcatatatggacatcggggacctgttaagtccaggataac  
tggttcgaatccagtaccgtcagcca  
1-7tRNA-Glu(ttc)[146316,146393]  
gtcctggtagacaaactggataaagtcaccaccctttcaaggtggagttt  
gagggttcgatcccctctcaggacgcca

1-8tRNA-Glu(ctc)[146400,146479]  
taccgggtgcgacaagcggtaagtcgtccaccgctcgaatgaacgtggag  
acacaggttcgatccctgtccggtaacca  
1-9tRNA-Asp(gtc)[146575,146650]  
ggtcctatggtattagcggtaacatactgcctgtcacgcgagagtcac  
gggttcgaatcccgttaggaccgcca  
1-10tRNA-Ile(gat)[146658,146732]  
tggggattagctcagggtagagcgcacaactgataattgtgaggtcgg  
ggttcgaaaccaccatccccaacca  
1-11tRNA-Pro(tgg)[146803,146879]  
cggtgtatagcgcagcctggtagcgcactgtggttgggaccagagggtcg  
ctggttcgagtcagctacaccgacca  
1-12tRNA-Met(cat)[146886,146960]  
tcgaggtagttcagcggtagaacaggggttcatacgcctcatgtcggc  
agttcgattctgcccttcgaacca  
1-13tRNA-Leu(tag)[146967,147044]  
gctccagtagcccaattggtagaggcacttgattaggatcatgtcaatg  
atgagttcgaatctctcctggagtacca  
1-14tRNA-Gly(tcc)[147051,147124]  
gcgggcatggtatagtggtgtgccttagcctccaagctaattgagtcg  
gttcgatcccggatgtccgctcca  
1-15tRNA-Gln(ttg)[147198,147273]  
aggggattagtttaattggtaaaacatcgggtttgatcccgcacatcgtg  
aggttcgaatcctccatccccgcca  
1-16tRNA-His(gtg)[147356,147431]  
gtggcctaattcagcaggtagaatccccggtgtgaaccgggcagtcgt  
gggttcaagtcccacaggtcacccca  
1-17tRNA-Ser(tga)[148112,148204]  
ggaagatagggcgtagtggtacgcacccggattgaaccccgcccgtg  
tggcgacccacggatagttcgactctattatcttcgcca  
1-18tRNA-Ser(gct)[148209,148295]  
agaagagtggcgaaatcggtagccgcaccggactgctaataccgggtccc  
tcggggcctgagagttcaagtctctctcttctgcca  
1-19tRNA-Phe(gaa)[148301,148376]  
ggaactgtagctcagttggtagagcgggtgcctgaagagcagcgcgtcag  
cggttcaaatccgttcagttccacca

>JN132397.1 Campylobacter phage CPX, complete genome

1-1tRNA-Tyr(gta)c[38265,38350]  
gtaagcatatgggtaattggttaaccaccagactgtaaatctggcgtctc  
ttggcactgcaggttcgagtcctgctgcttacacca  
1-2tRNA-Arg(tct)c[38361,38437]  
ctccatgtagctcagctggatagagaagaatcttctaagttctaggtcg  
ggtgttcaaatcactccatggaggcca  
1-3tRNA-Asn(gtt)c[38447,38522]

tcgggattagcacagtggtagtgcaatcgactgtaaatcgatggggtcat  
agggtcgaatcctatatccgtagcca  
1-4tRNA-Met(cat)c[38793,38867]  
agcagagtgacgcagtagtagcgtgctgggctcataaccagatgctgta  
gggtcaaatacctacctctgtaacca  
1-5tRNA-Leu(taa)c[38873,38950]  
tggacatgtagcgtcaagtggtagagcagccgacttaaaatctgcagat  
tgatgggtcgatcccatccatgtccaac  
1-6tRNA-Met(cat)c[38955,39029]  
gggcgagtagctcaatggtagagcaaccggctcataaccggttggttata  
ggttcgattcctatttcgcccacca

>JN593240.1 Escherichia virus CBA120, complete genome

1-1tRNA-Met(cat)[136807,136881]  
ggtcctgtagctcagtggtagagcagccccctcataagggattggtcgct  
ggttcaagtcagccagggtcacca  
1-2tRNA-Asn(gtt)[137294,137369]  
gacgatgtagttcagtcggtagaacgcgggtctgttaaatcgatgtcgc  
agggtcaagtcctgccgtcgtcgcca  
1-3tRNA-Ile(gat)[137986,138069]  
gccggagccataggggtggccagtagccgactgatcatcggcgacgac  
actggacagggtcgaatcctgttctcccgtcca  
1-4tRNA-Ser(gct)[138074,138162]  
ggaaggttgcccagaggtttaagggactcgactgctaatacgatggggc  
tttagccccgaaggttcgaatccttcaccttcgcca

>AJ972879.2 Yersinia phage phiR1-37 complete genome

1-1tRNA-Arg(tct)[67659,67735]  
cggggtgtagcataataggataatgcaccgaccttctaagtcggcttacg  
tgggttcgactccctccgtcccacca  
1-2tRNA-Leu(tag)[67746,67829]  
tgcaaatgtggcgaaattggtagacgccccagatttaggttctggatcgc  
aaaggtgtgtgggttcgactccctccattcgcaa  
1-3tRNA-Leu(taa)[67838,67925]  
gtctgctgtccaaattggtaaaggaaggagactaaaatctccggctg  
taacagccttatgggttcgactcccttagcagatacca  
1-4tRNA-Asn(gtt)[71536,71613]  
gactcgctagctcagttggttagtagcgatgactgttaatcatcaggtc  
gcaggttcaagccctgcgcgagtcgcca

>JN022534.1 Xanthomonas phage vB\_XveM\_DIBBI, complete genome

1-1tRNA-Asn(gtt)[1645,1720]  
ggccgattagcaagtgggacacgcggcgactgtaatccgtgaattacc  
tggttcgactccaggattggccgcca  
1-2tRNA-Ser(gct)[1911,1999]  
ggcgggtgtcagagcggcttattgaagttgactgctaataacccggggc  
gcaagtcccgcagaggttcgaatcctctacccgcccga

1-3tRNA-Asp(gtc)[2162,2238]  
aggccccgtagtgtaggcggttaacatactcccctgtcacgggagagatcg  
cgggttcaaaccctgcgggcctcca

1-4tRNA-Ala(ggc)c[16132,16220]  
gattgtatcggctggcgtgtcgctgttgctggcgtcgatgttccgatgt  
gtactgtcacattgttcacggttcacccgctacagttg

>HM144387.1 Bacillus phage W.Ph., complete genome

1-1tRNA-Asn(gtt)[8115,8190]  
gtgcttagctcagtagtagagcgtcagattgttaatctgggggtcgc  
aggttcaatccctgcttagcacgcca

1-2tRNA-Glu(ttc)[8195,8271]  
gtcgcatgggtgaaattggctaacacactcggcttctaccgaggattta  
ggggttcgagcccctatgcgattcca

1-3tRNA-Asp(gtc)[8275,8348]  
tggggatatagttagtggtgaacacgcacggctgtctaccgtgaagcac  
gagttcgagtctcgttatcctcgt

>JN627160.1 Pseudomonas phage OBP, complete genome

1-1tRNA-Met(cat)c[16040,16116]  
ggccccgtagctcagacggtagagcaggtgactcataatcgcttggtcg  
cgtgttcaagtcacgccggggccacca

1-2tRNA-Arg(tct)c[16121,16196]  
gcgctcttagctcagtgtagtagcagtagccttctaagctattggtcac  
aggttcgaatcctgtagggcgcgcca

1-3tRNA-Ser(gct)c[16733,16821]  
agagagttggatgagttggtttaagtcacctccctgctaaggaggcagtc  
cttcggggctcatgggtcgaatcccatactctctgccca

1-4tRNA-Asn(gtt)c[16826,16901]  
gctcgtgtagttcagtcggttagaacggcgactgttaatccgtatgtcac  
aggttcgagccctgtcacgagcgcca

>JN882285.1 Cronobacter phage vB\_CsaM\_GAP32, complete genome

1-1tRNA-Ser(gct)[271095,271185]  
ggtgagttgggggagtcggttaaccagcaccctgctaaggtgtcggcc  
tcgcaagaggccctgggttcaaataccacactcaccgcca

1-2tRNA-Trp(cca)[275545,275617]  
aggagtatagtataacggctattatgtgtggctccaaccacaagatcag  
ggttcgattccttgtgtcctgc

1-3tRNA-Thr(tgt)[278688,278770]  
gctgccttcccataattggtattggaccgcactgtaatcgggcgggaa  
accattctcggttcgagtcgaggggtagcac

1-4tRNA-Leu(tag)[284186,284268]  
ggggatgtggtgaaattggcagacacgccagattaggttctgttcttc  
ggagtgcgagttcgagtctgccatccccacca

1-5tRNA-Arg(tct)[292115,292188]  
ctcctgttagttcaaacggaagaacatcgaccttctaagtcgaggttac

tggttcgagtcagtcacgggagac  
1-6tRNA-Pyl(cta)[293273,293345]  
gcccttgtagttcagcggtagaacgggagtcctctaaaactcctgtcga  
ggttcgaatcctgtcaagggcac  
1-7tRNA-Leu(taa)[293351,293433]  
gcgggtatgggtgaaattggtaaacacaggggatttaagttccccgctga  
ggcttgacggttcagtcctctacccgacca  
1-8tRNA-Met(cat)[293844,293918]  
gggactgtagcttaaagttaaagcagtgccctcataagccaacgagtgga  
agttagagtcctcccggtccacca  
1-9tRNA-Leu(taa)[296175,296262]  
gcgggtgtggcggtattggcagtcgcacaagacttaaaatctttaggg  
gtttccccttgtgagttcgaatctcatcaccgtagca  
1-10tRNA-Leu(caa)[301093,301180]  
ggggatatggcgaaattggtagcacgcaggagactcaaaatctcccgcca  
gagatggcgtgtcgggtcagtcgactatcccccacca  
1-11tRNA-Glu(ttc)[306268,306340]  
gttcccatcgtctagcggctaggacgcttccctttcaaggaggaaaccgg  
agttcgattctcgtgggaacgc  
1-12tRNA-Tyr(gta)[306352,306433]  
ggggagttggcagagcggtcgaatgcacctgactgtaaatcaggcacacc  
acacctggttcgaatccaggacgccccacca  
1-13tRNA-Ser(tga)[306770,306864]  
ggaagattggcagagtcgtgtttattgcaccgcacttgaaatgcggcgaa  
ctagtaaccctagttcctacggtcaaatacgttaattcttctcca  
1-14tRNA-Ile(gat)[308436,308510]  
gggaatatagcacaattggtcagtcgactcgcccgataagcgagatgta  
cgtgttcgagtcacgttattccac  
1-15tRNA-Asn(gtt)[310988,311061]  
ggttacgtagctcagcggtagagcgttcgcctgttaagcgaagggtcgc  
tggttcaatccagccgtgatcgc  
1-16tRNA-Gln(ttg)[311137,311210]  
aggggattagccaagttggaaggcacatggtttgatccatgtatgcgg  
aggttcgagtcctccatcccctgc  
1-17tRNA-Gly(tcc)[311346,311418]  
gcatccatcgtatatcggtattataattggcttccaccaatagaacgg  
agttcgaccctccgtggatgctc  
1-18tRNA-Asp(gtc)[312880,312952]  
ggagccatcgttcaacggtaggatacggcactgtcactgctgagatggg  
gttcgattaccctggttccgc  
1-19tRNA-Arg(acg)[313536,313612]  
gttcgtgtagctcaactggaattagagcgttcgtctacgaagcgaaaggt  
tataggttcgatccctatcatgaacac  
1-20tRNA-Pro(tgg)[315418,315493]

cggagtgtgggctaattggtagccgcctagtttgggactaggagtttat  
 gcaggttcgagtcctgtctctccgac  
 1-21tRNA-Phe(gaa)[317155,317229]  
 gggtcggtaactcagttggtcagagtatacactgaaaatgtattggtcg  
 cgagttcgaatctcgcccgccac  
 1-22tRNA-Lys(ttt)[318210,318283]  
 acctcgtaactcagttggtagagtaacggctctttaaaccgtgagtcgc  
 tggttcgaaccagcacgaggtac  
 1-23tRNA-Cys(gca)[322498,322575]  
 gcagggatgcctgagatggcttaaaggagcggattgcaaaccgatgttc  
 gggggttcgaatccccctccctgtcca  
 1-24tRNA-Met(cat)[323476,323551]  
 ggtcagttagttcagttggtagaacgtttcactcataatggagaggcttc  
 actggttcaagtccagtactgaccac  
 1-25tRNA-Met(cat)[324419,324498]  
 tcgggagtagagcagtcctggtagctgcaaggctcataacctgaggtcg  
 tgttgggtcgaatcccacctccgcatcca  
 1-26tRNA-Ala(tgc)[324515,324588]  
 ggggctatagctcagttgggagagcgtctgccttcacgtagaagggtcaa  
 cggttcgaaccggttagctccac  
 >HQ698922.4 Acinetobacter phage ZZ1, complete genome  
 1-1tRNA-Trp(cca)c[73037,73108]  
 gggtcgtagttagttggaaacacggtggattccaaatccgcaatccag  
 ggttcgagtccttggcgacgcc  
 1-2tRNA-Pro(tgg)c[73349,73425]  
 ctccgtatagctcagtcctggtagagcactgcgttgggacgcaggtgtcg  
 aatgttcaaatactctacggagacca  
 1-3tRNA-Ser(tga)c[73639,73733]  
 ggaaggtcaagccgaaagctggcgacggcagctgactgaaatcagtcga  
 gcgtggtgacacgccttgagggttcgacccctcacctccgcca  
 1-4tRNA-Thr(tgt)c[73887,73962]  
 gccgtcatagctcagttggtagagcgtctgtttgtaatcagagggtccg  
 gggttcaaatactctgtcggcacca  
 1-5tRNA-Cys(gca)c[75677,75753]  
 gacgtcgtggcagaattggttatgcggcgattgcaaaccgcgtcgaatg  
 agggttcgaatccatccggcgtctcca  
 1-6tRNA-Met(cat)c[75945,76021]  
 gggccttagctcaattggtagagcagcggactcataatccgttggttc  
 ccagttcaagtctgggaggccaccca  
 1-7tRNA-Arg(tct)c[76027,76102]  
 ccgtctgtggccgaatggattaggcatcgtagtctattgcgactcacac  
 aggttcgaatcctgtcaggcggacca  
 1-8tRNA-Pyl(cta)c[76196,76269]  
 cgttcagtaggttaacggtagaccaggagtcctaaaactctgtgtgacg



gttcgaatccgtcctgaacgacca  
>JN797797.1 Bacillus phage BCP78, complete genome  
1-1tRNA-Met(cat)c[37,109]  
agggtttagctcagtggttagtcggtctcataagccaaggctcgt  
aggttcgactcctactagcccta  
1-2tRNA-Leu(tag)c[253,327]  
tgccgaagtaatccaatggcagagatagcggtttagaaaccgtacagt  
tgggttcgagtcacaccttcggtat  
1-3tRNA-Leu(taa)c[332,419]  
ggcggagtgtggaattggtagacatatggcacttaaaatgctatgtccg  
tatgggcgtgggttcgagtcacccctccgctacca  
1-4tRNA-Ile(gat)c[435,511]  
gctagggtagctcagtcaggtagagcagtgcttgataaggcattggctc  
taggttcaaactcctaccctagtagcca  
1-5tRNA-Tyr(gta)c[513,599]  
gggcgagtagtcaaattggtgaagcaagcggctgtaaaaccgtgacgta  
agatacattgcaggttcgagtcctgccttccacca  
1-6tRNA-Phe(gaa)c[739,814]  
ggacggatagctcagttggtagagcagaggctgaaaatcctcgtgtcgt  
aggttcgatccctactccgtccacca  
1-7tRNA-Pro(tgg)c[929,1005]  
tgtagggttagctcagattggctagagcgttgcttgggagcaagaagt  
cgcaggttcaagtctgcaccccgcat  
1-8tRNA-His(gtg)c[1047,1118]  
cggggtgtggcgtaacggtaacgcaagtgactgtggatcactgaatagg  
ggttcgattcccctcatcctga  
1-9tRNA-Gln(ttg)c[1201,1273]  
tttcggagtagccaagtggtaaggcaatagactttgactctatgatcggt  
ggttcgagaccatcctccgaagt  
1-10tRNA-Ser(tga)c[1351,1442]  
ggaagggtagtcaagtggataaaagagtcggtcttgaaaaccgctaggc  
gtgtaaaagcgtgcgtgggttcgaatcccactcctccgcca  
1-11tRNA-Arg(tct)c[1447,1523]  
tatcccattagccaagttggatcaaggcaacgggcttctatcccgttaat  
cgtgggttcgagtcctacatgggatgt  
1-12tRNA-Ile(tat)c[1603,1677]  
gcccctttagccaagcgggtcaaggcagtgaggattatgtcctgcgaatcg  
gaagttcgaatctccaaggggagc  
1-13tRNA-Glu(ttc)c[1681,1754]  
ggggatttggtgaagtgggtcaaacacatccgactttctatcgagatacg  
agggttcgaatcccttataccctt  
1-14tRNA-Asp(gtc)c[1883,1955]  
tggggtattagtttagtggtaaaatactgcactgtctatgcagagtcagg  
ggttcaactcccctatacctcgt

1-15tRNA-Gly(tcc)c[1960,2035]  
ggggcattagtatatcggttcattattcctggctccaaccaggggaggt  
cggttcgattccgacatgtccctcca  
1-16tRNA-Ser(gct)c[2042,2132]  
ggagagttgtcagagtggttatcgtgcctgtttgctaaataggtgtacg  
tccttaacgtaccacaggttcaaatcctgtactctccgcca  
1-17tRNA-Asn(gtt)c[2619,2693]  
gctcctgtacgtagcggttagcgcagcagcctgttaagctgttggtcggg  
ggttcgaatccaccagagcgcca  
1-18tRNA-Cys(gca)c[2707,2780]  
gaagggtgtaccgaagtggcttaacgggctagattgcaaccctagttttcg  
tgggttcgaatcccaccactttct

>JX569801.1 Campylobacter phage CP30A, complete genome

1-1tRNA-Tyr(gta)c[88608,88693]  
gtaagcatatgggtaattggtaaccaccagactgtaaatctggcgtctt  
ttggcattgatgggttcaaatccatcctcctacacca  
1-2tRNA-Arg(tct)c[88704,88780]  
ctccatgtagctcagctggatagagcaagaatcttctaagttctaggtcg  
ggtgttcaaatcactccatggaggcca  
1-3tRNA-Asn(gtt)c[88790,88864]  
tgcggattagcacagtggttagtgcaatcgactgttaatcgatgggtcata  
ggttcgaatcctatatccgcagcca  
1-4tRNA-Met(cat)c[88958,89032]  
gggcgagtagctcaatggtagagcaaccggctcataaccggttggttata  
ggttcgattcctatttcgccacca

>JF966203.1 Bacillus phage Bastille, complete genome

1-1tRNA-Asn(gtt)[5856,5930]  
tgtgctttagctcagtcggtagagcgccagattgttaatctgatggtcg  
cagggttcgattcctgcttggcacgt  
1-2tRNA-Trp(cca)[6692,6765]  
gggagtttagtttagtggtaaacctcggctcctcaaaaccgaagtcatat  
gttcgattcgtagctcctgccca  
1-3tRNA-Ser(tga)[6767,6854]  
ggagggttggcagagtggtattatgcagcggcttgaaaaccgccgaggg  
taaaacctccgtgagttcaaatctcacacctcctcca  
1-4tRNA-Asp(gtc)[6856,6929]  
tggggataatgtagaggtaaacacgtacggctgtctaccgtgaagcac  
gagttcgaatctcgttaccctcgt  
1-5tRNA-Leu(tag)[7151,7228]  
tgccgaagtaatccaatcaggtagatagcggttttagaaaaccgtccag  
tgtgggttcgacccctccttcggtatc  
1-6tRNA-Tyr(gta)[7235,7318]  
tggcagaatagtcgaagcggaacgacaggtgactgtaaatcaccctcat  
tcgagttcgtaggttcgagtcctcgtctctctat

1-7tRNA-Ser(gct)[8231,8318]  
ggaggggtactcaagcgggaagaggttagtttgctaaactaataggtcg  
agtaatcggcgcgaggggttcgaatccctccccctccac

>JN986846.1 Enterobacteria phage vB\_EcoM\_ACG-C40, complete genome

1-2tRNA-Arg(tct)c[68043,68118]  
ggggcatagctcagaaggaagagcaaggaccttctaagtcctgggtcgt  
aggttcgatccctactgcctcgacca

1-3tRNA-His(gtg)c[68123,68198]  
gtggccgtagttcagttggtagaactcgagattgtgattctcgtagtc  
gggttcgactcccatcggtcacccca

1-4tRNA-Asn(gtt)c[68313,68387]  
ggatgtgtagctcaatggcagagcgatcgctgttaagcgattggttata  
ggttcgaatcctatcacgtccgcca

1-5tRNA-Tyr(gta)c[68392,68478]  
ggggagtatcccgtagaggtagcgggtggactgtaaattcattgtcat  
tgcgactcgggtggttcgactccatcactccccacca

1-6tRNA-Met(cat)c[68491,68565]  
ggccctgtagctggaaggtcaagcaagcgactcataatcgccagatggt  
ggttcaattccaccaggccacca

1-7tRNA-Thr(tgt)c[68567,68642]  
gctgatttagctcagtaggtagagcaactcacttgaatgagaaggtcgg  
cggttcgattccgtcaatcagcacca

1-8tRNA-Ser(tga)c[68648,68737]  
ggaggtgtggcagagtgtttaatgcaccggtcttgaaaaccggcagtcg  
ctccggcgactcataggttcaaactctatcgctccgcca

1-9tRNA-Pro(tgg)c[68739,68813]  
ctccgtgtagctcagtttggtagagcgctgattgggatcaggaggtcc  
aaggttcaaatccttgtatggagac

1-10tRNA-Gly(tcc)c[68824,68897]  
gcggatattgtataatggcattacctcagacttccaatctgatgtga  
gttcgatttcattatccgtcca

1-11tRNA-Leu(taa)c[68903,68989]  
gcgagaatgggtcaaattggtaaaggcacagcacttaaaatgctgcggaat  
gatttccttgggttcgagtccttctcgacca

>JN882284.1 Cronobacter phage vB\_CsaM\_GAP31, complete genome

1-1tRNA-Met(cat)[84261,84337]  
ggttctgtagcttagttggttagagcgcttccctcataaggaagaggtcg  
caggttcaatccctgccagaactacca

1-2tRNA-Lys(ctt)[85032,85107]  
ggggattaaactcagcggtagagtagcgccctctaagccgaaggtcga  
aggttcgaatccttcattgccccacca

1-3tRNA-Thr(tgt)[87106,87180]  
gctcctaaagcataagtggcgatgcagcggccttgaagccgaggaagtg  
ggttcgattcctactgggagcacca

1-4tRNA-Arg(gcg)[87187,87260]  
tcgtttagatagccttagcggttaaagccccctctgcgcaaggggttcagtg  
gttcgaatccacttcagcgagcca  
1-5tRNA-Leu(taa)[87563,87640]  
gcgctcttggccaatctggtagagcatgggtgttaagctcccagggtt  
cccgggttcgagtcgggagggcgcacca  
1-6tRNA-Arg(tct)[87645,87719]  
cgggtatagctctagaggataggcaggagtcttctaaactccttacgtg  
ggttcgaatcctactacctcgacca  
1-7tRNA-Cys(gca)[87725,87798]  
gcgcggttgctggagtggaacagcttcggctgcaaaccgaatgtcaggt  
gttcgattcacctaccgtgctcca  
1-8tRNA-Tyr(gta)[88253,88340]  
ggggcggttcccggagcggcaaacgggcgggattgtaaatcccttggcat  
cgcgtccttcgtaggttcgagtcctactcggccacca  
1-9tRNA-Ile(gat)[88347,88421]  
gggagtatagctcagtggttagagcaaacggtcgataaccgttaggtcgct  
ggttcaagcccagctactcccacca  
1-10tRNA-Gly(tcc)[88428,88503]  
gcgttattagtgagtggtccagcatcccgctcctccaagtcggtgacat  
cgggttcgaatccgataaacgtcca  
1-11tRNA-Glu(ttc)[88511,88586]  
gtcctatcggctaaacggtcaggccgccagactttcaatctggaatcc  
gagttcgattctcgggtgggagtgcca  
1-13tRNA-Trp(cca)[88672,88748]  
agggacttagcacaattggctagtcgacggattccaaatccgcaggttc  
tgggttcgaatcccagggtccctgcca  
1-14tRNA-Gln(ttg)[88886,88961]  
aggaggatgggtgaattggttagcacacgggctttgatctccggagtta  
gggttcgagtccttatcttctgcca  
1-15tRNA-Ser(gga)[89077,89169]  
ggtggaatggtcgagcgggttaagacaacaccttgaaagggtgcggccc  
cttcaaacgggtccgtaggttcgaatcctacttccaccgcca  
1-16tRNA-Ser(gct)[89331,89422]  
ggaagattaaccctaacggtaagggatctcttgctaaagagacagtagc  
ccccaaaaggggtgtgtcagttcgagtcgacatcttcctcc  
1-17tRNA-Ser(tga)[89423,89511]  
ggagagcaggctgcatgggtgcagactccggttgaacccgggtcccatcgt  
agcgatacggtgacagttcgattctgtgtctctctcca  
1-18tRNA-Asn(gtt)[89773,89861]  
ggttcttgaccgagaggccgatggttagcaggctgttaacctgccgggag  
caatccccgacgaaggttcgaatccttcaggaaccgcca  
1-19tRNA-Asp(gtc)[89867,89942]  
ggagatatagtttaaacggataaaatacaccctgtcacgggtatgttcc

gggttcgatgcccgtatctccgcca  
1-20tRNA-Pro(tgg)[90066,90143]  
cggagcgtagcgcagctctggtcagcgtgggtgccttggatgcactgggtc  
gcaggttcgaatcctgccgctccgacca  
1-21tRNA-Arg(acg)[90149,90223]  
gcaggtatagttcaacggatagagcatcagtttacgaagctgagaatcgg  
ggttcgaatccctgtatctgcacca  
1-22tRNA-Ala(tgc)[90228,90303]  
ggggctgtagtttattggataaaatcgaggcttcaccttcgagaact  
gagttcgattctcagtggtccacca  
1-23tRNA-Leu(tag)[90339,90415]  
gggcgattgatggaattggtatagtcgtcggatttagattccgaatttg  
ggggttcgagtcacctgtcggccacca  
1-24tRNA-Val(tac)[90424,90497]  
gcttccttagtttaatggtagaacctgtctttacacggcagttgcggta  
gttcgattctaccaggaagtacca  
1-25tRNA-Phe(gaa)[90505,90580]  
gggggtgtaactcagttggtagagtcctgcctgaagagcagatggtcgg  
tggttcgagtcacccggcccccacca

>HM997020.1 Escherichia phage wV7, complete genome

1-1tRNA-Arg(tct)c[69195,69270]  
cggggcatagctcagaaggaagcaaggaccttctaagtcctaggtcgt  
aggttcgatccctactgcctcgacca  
1-2tRNA-His(gtg)c[69275,69350]  
gtgaccgtagttcagttggtagaactcgagattgtgattctcgtagtc  
gggttcgactcccatcggtcaccacca  
1-3tRNA-Asn(gtt)c[69465,69539]  
ggatgtgtagctcaatggcagagcgcctgttaagcgattgggtata  
ggttcgaatcctatcacgtccgcca  
1-4tRNA-Tyr(gta)c[69544,69630]  
ggggagtatcccgtagaggtagcgggtgtggactgtaaattcattgtcat  
tgcgactcgggtggttcgactccaccactccccacca  
1-5tRNA-Met(cat)c[69643,69717]  
ggcctgtagctggaaggttcaagcaagcgactcataatgccagatggt  
ggttcaattccaccagggccacca  
1-6tRNA-Thr(tgt)c[69719,69794]  
gctgatttagctcagtaggtagagcaactcactgtaatgagaaggtcgg  
cgggttcgattccgtcaatcagacca  
1-7tRNA-Ser(tga)c[69800,69889]  
ggaggtgtggcagagtggttgaatgcaccggtcttgaaccggcagtcg  
ctccggcgattcataggttcgaatcctatcacctccgcca  
1-8tRNA-Pro(tgg)c[69891,69965]  
ctccgtgtagctcagtttggtagagcgcctgattgggatcaggaggtcc  
aaggttcaaatccttgatggagac

1-9tRNA-Gly(tcc)c[69976,70049]  
gcggatatcgataatggtattacctcagactccaatctgatgatga  
gttcgattctcattatccgctcca  
1-10tRNA-Leu(taa)c[70055,70141]  
gcgagaatgggtcaaattggtaaaggcacagcacttaaatgctgcggaat  
gatttccttgggttcgagtcacacttctcgacca  
1-11tRNA-Gln(ttg)c[70142,70215]  
tgggaattagccaagttggaagcatagcactttgactgctagatgcaa  
aggttcgagtcctttatcccagc

>JN126049.1 Salmonella phage PhiSH19, complete genome

1-1tRNA-Met(cat)[137303,137378]  
ggctctgtagctcagtggttagagcagtcgactcataatcgattggtcat  
tggttcaaaccatcaggatcacca  
1-2tRNA-Asn(gtt)[137806,137881]  
gacgatgtagtcagtcggtagaacggaggactgtaatccatgtcgc  
aggttcaagtcctgccatcgcgcca  
1-3tRNA-Tyr(gta)[138497,138580]  
gtgagtggtgcagagcggtcgaatgcaggagactgtaaatctccccgtaa  
cagcgcgggtggttcaaaccatccactcacacca  
1-4tRNA-Ser(gct)[138657,138745]  
ggaaggtgcccagaggttaagggactcgactgtaatcgagtggggc  
tttagccccgaaggttcgaatccttcacctccgcca

>JX536493.1 Enterobacteria phage HX01, complete genome

1-1tRNA-Met(cat)[31995,32069]  
ggccctgtagctcaatgggagagctgtcagctcataactgataggtagct  
ggatcgaaccagccagggtcacca  
1-2tRNA-Arg(tct)[32073,32149]  
cgaggcatagctcaattgtatagagcaacggacttctaaccgtaggttg  
aaggttagaatccttctgtctcgacca

>JN882287.1 Cronobacter phage vB\_CsaM\_GAP161, complete genome

1-1tRNA-Met(cat)[49480,49556]  
ggcccttagcttaattggttagagcgggtgactcataatcgcgcggttg  
ctggttcaagtcagcaggggccacca  
1-2tRNA-Gly(tcc)[49562,49637]  
gcaggtgtagttcaattggtagaatatctggttccatccagattgttga  
gggttcgagtccttcacctgctcca

>JQ686190.1 Staphylococcus phage GH15, complete genome

1-1tRNA-Met(cat)c[15353,15424]  
ggactcttagcttaaaggtaaagccaaccgctcataacggttgactgta  
ggttcgaatcctgcagagtcca  
1-2tRNA-Trp(cca)c[37771,37842]  
acacccttagtataattagtagtacaagggtctccaaaacccttagtctt  
tgtgcaaatcaaagagggtgtg  
1-3tRNA-Phe(gaa)c[37849,37921]

ggtttcttagctcagatggtagagcactagattgaagctctaggtgtcat  
tggttcaaatccaatagaaacca  
1-4tRNA-Asp(gtc)c[37927,38002]  
tggctcattggtgtaactggttaacacactgccctgtcacggcagagagt  
acgagttcaggtctcgtatgagtcgt

>JN371769.1 *Synechococcus* phage metaG-MbCM1, complete genome

1-1tRNA-Leu(taa)[17905,17989]  
gggagtggtggcgaataggttagacgcaccagacttaaaatctgttagca  
tgtgctcgtgggagttcaagtctccctactcctac  
1-2tRNA-Arg(tct)[159596,159670]  
tgggtcagtagcacagcggatagtgaactgccttctaagcagtcggtcg  
caggttcaaatcctgcctgacccgt

>JN377894.1 *Aeromonas* phage Aes508, complete genome

1-1tRNA-Arg(tct)c[60935,61011]  
ggtctcttagctcagtcggatagagcagcggccttctaagccgcggtca  
ttggtcgaatccaatagggactgccca  
1-2tRNA-Met(cat)c[61580,61655]  
ggccctctgcacagctctgtaatgtgccagctcatalaactggggaagcc  
gggttagattcccgggaggccacca  
1-3tRNA-Met(cat)c[61821,61897]  
tgcgatgtagaggagaggtcgtcctcgtcgggctcatatcccgaatca  
gcggttcgaatccgttcacgcctcca  
1-4tRNA-Asp(gtc)c[61910,61983]  
ggagccatagttatttggtaaaatagctcccctgtcacgggtcagcacc  
gagttcgatcctcgggtggctccgc  
1-5tRNA-Thr(tgt)c[62384,62459]  
gccggttagctcatctggtagagcacagccttgaacgctggggtggt  
ccgttcgagtcggacaatcggcacca  
1-6tRNA-Pro(tgg)c[63093,63167]  
ctcagcgtaggcaagtggtatgtcgttccgttggggcggaattttcggg  
tgttcgattcaccctgagacca  
1-7tRNA-Gly(tcc)c[63413,63488]  
gcgatattagctcagttggtagagcttctgattccaatcagaatgtcat  
cggttcgagaccgatatacgtcca  
1-8tRNA-His(gtg)c[63500,63574]  
gtgacctagtagtaatggtagctatcctggatgtgaccaggagtagc  
ggttcgaacccgtaggtcacccca  
1-9tRNA-Tyr(gta)c[64544,64634]  
ggatactcggctacgatggcggtagcggcagactgtaaatctgttccc  
tcagggcaaacaagatggttcgaatccatcagtatccacca  
1-10tRNA-Asn(gtt)c[64648,64730]  
ggtgatgtagcataacggccatgcggccggtgttaaccggtgaggaaac  
tctacgttgggtcgactccaaccatcaccgcca  
1-11tRNA-Ser(tga)c[64899,64992]

ggaagattggcccgagttggtttaaggcaccggtcttgaaaaccggcga  
cgtaggaatacggatccatccgttcgaatcgatatcttctcca  
1-12tRNA-Leu(taa)c[65184,65269]  
gcaagtatggtggaattggtatacactggagactaaaatcttcgcct  
tcgggattgtgggttcgagtcctcactactgcacca

>GU988610.2 Pseudomonas phage JG004, complete genome

1-1tRNA-Gln(ttg)[22657,22730]  
tgccgcttcgttcaatggtaggacgccagacttgaatctggagatgatg  
gttcgatcccatcagtggtgccca  
1-2tRNA-Arg(tct)[23036,23110]  
gctcgtatagttaatggatgcacaacggccttctaagccgtaaggtcta  
ggttcgagtcctagatagcgcca  
1-3tRNA-Lys(ttt)[23118,23194]  
tggacggaagctaaagtgatcagcatctggctttaaccagacttatag  
tgagttcgagtcacccgttcaacca  
1-4tRNA-Leu(tag)[23469,23553]  
ggccctgtggtggaattggtatacacatcagtcctagaaactgacccga  
gaggattgagggttcaagtcctccggggccacca  
1-5tRNA-Ile(gat)[23764,23839]  
ggccagatagctcaattggtagagccccgaccgataatcggtggttga  
aggttcaagtccttctctggccacca  
1-6tRNA-Asp(gtc)[23849,23927]  
ggccattagctcagtcctggactagagcaagcccctgtctagggaaggt  
cgccggttcgaatccggcatgggtgccca  
1-7tRNA-Met(cat)[24028,24102]  
agcgttaagactggctggcgctgtcactcggctcataaccgaatacaagt  
ggttcgattccacctctcgctcca  
1-8tRNA-Cys(gca)[24337,24412]  
cccgcgttgccgagaggttagcgggcggttgcaaatccgtctcacat  
cggttcaaatccgatacgggtcca  
1-9tRNA-Asn(gtt)[24423,24498]  
tgggatgtagctcagttggtagagcaggagctgtaactctcaggtcgc  
aggttcgagccctgccgtcccagcca  
1-10tRNA-Pro(tgg)[24562,24639]  
ctctcgtagctcagtcctggttagagtgctggatttggaatccgaaggtc  
gaaggttcaaatcctccgggtgacca  
1-11tRNA-Gly(tcc)[24646,24721]  
gcgggtatagctcagttggtagagcgtctgcctccaagcagttcgtcgt  
cggttcgagtcctctatccgtcca  
1-12tRNA-Phe(gaa)[24728,24804]  
gggactgtagctcagaaggttagagcgggtgattgaaatcccacaggtcg  
ggcgttcgattcggccgggtcccacca  
1-13tRNA-Glu(ttc)[24811,24886]  
gcagttatagattaattggttaaatgccagacttcaatctggtgtcc



gggttcgatccccggttaactgctcca  
1-14tRNA-His(gtg)[24947,25021]  
gtggagattgtgtagcccgatgctgccttcggtgtgacccgattgt  
ggggttcgagtcctccaacc  
1-15tRNA-Thr(tgt)[25208,25282]  
gccctttaagcatttatggtagtcaccggcttgaacccggcgaattc  
tgttcaagtcaggaatggggcacca

>JN371768.1 *Synechococcus* phage S-MbCM6, complete genome

1-1tRNA-Leu(taa)[17220,17306]  
tgggagtggtggcggaatcggtagacgcaccagactaaaatctgtgaga  
attaatctcgtgggagttcaagtcctactcccat  
1-2tRNA-Thr(tgt)[19061,19133]  
gcctccgtagctcagtggtagagcagggtttgtaaagtcaggtcgca  
agttcaaatctgtcagaggctc  
1-3tRNA-Asn(gtt)[19138,19210]  
tcctctatagctcagttggtagagcagtgactgttaatcacctgtccc  
tgggtcagtcagggtggaggag  
1-4tRNA-Arg(tct)[158217,158291]  
tgggtcagtagctcagcgatagaccacgcacttctaatacggttggtcg  
cagggtcgattcctgcctgactcgt

>JN673056.1 *Escherichia* phage PhaxI, complete genome

1-1tRNA-Met(cat)[136135,136211]  
gggtctgtagtttaataggttagaacaacggactcataatccgtcaggtc  
tcagttcaaatctgggtggaccacca  
1-2tRNA-Asn(gtt)[136693,136768]  
gacgatgtagttcagtcggtagaacgggtgactgttaatccatatgtcgc  
aggttcaagtcctgccatcgtcgcca  
1-3tRNA-Ser(gct)[137453,137541]  
ggaagggtgcccagaggtttaagggactcgactgtaatacgagtggggc  
tttagccccgaaggttcgaatccttcacctccgcca

>JQ362498.1 *Sphingomonas* phage PAU, complete genome

1-1tRNA-Asn(gtt)[1273,1347]  
tatctttagctcagctggtagagcaagtgactgttaatcactaggtcg  
atggttcgaatccaatccaagtagc  
1-2tRNA-Trp(cca)[1352,1425]  
agggatatagctcagctggtagagcaatggctccaaaaccatcggtcgg  
tagttcgaatctatctgtccctgc  
1-3tRNA-Cys(gca)[1431,1508]  
gcacatatgggtgagtcaggtcaaaagcaacggctcgcaaaaccgtacaa  
ccattggttcgaatccaattatgtgctc  
1-4tRNA-Met(cat)[1518,1592]  
tgcgggtagagcagatggagtgtcgcgggtctcataagcccaggtca  
tgggttcgagtcctccctgctac  
1-5tRNA-Met(cat)[1598,1672]

gctccttagctcagttggtcagagcaacagactcataatctgaaggtca  
taggttcaagtcctgtaggagcac  
1-6tRNA-Met(cat)[1681,1754]  
agctcttctagctcaattggtagagttagattcattatctattggata  
tgggttcgaatcccatgagagcgc

>JN202312.1 Enterobacteria phage ime09, complete genome

1-1tRNA-Arg(tct)c[69044,69119]  
cgaggcatagctcagaaggaagagcaaggaccttaagtcctagggtcgt  
aggttcgatccctactgcctcgacca  
1-2tRNA-Asn(gtt)c[69124,69198]  
ggatgtgtagctcaatggcagagcgatcgctgttaagcgattgggtata  
ggttcgaatcctatcacgtccgcca  
1-3tRNA-Tyr(gta)c[69203,69289]  
ggggagttatcccgtagaggtagcgggtggactgtaaatccattgtcat  
tgcgactcgggtggttcgactccatcactccccacca  
1-4tRNA-Met(cat)c[69303,69377]  
ggccctgtagctggaaggtcaagcaagcgactcataatcgccagatggt  
ggttcaattccaccagggccacca  
1-5tRNA-Thr(tgt)c[69379,69454]  
gctgatttagctcagtaggtagagcaactcacttgaatgagaaggtcgg  
cgggtcgattccgtcaatcagcacca  
1-6tRNA-Ser(tga)c[69460,69549]  
ggaggcgtggcagagtgggttaatgcaccggcttgaaaaccggcagtcg  
ctccggcgactcataggttcaaactcctatcgctccgcca  
1-7tRNA-Pro(tgg)c[69551,69625]  
ctccgtgtagctcagtttggtagagcgctgatttgggatcaggaggtcc  
aaggttcaaatccttgtatggagac  
1-8tRNA-Gly(tcc)c[69636,69709]  
gcggatatcgataatggattacctcagactccaatctgatgtga  
gttcgattctcattatccgtcca  
1-9tRNA-Leu(taa)c[69715,69801]  
gcgagaatggccaaattggtaaaggcacagcacttaaaatgctcggaat  
gatttccttgggttcgagtccttctcgacca  
1-10tRNA-Gln(ttg)c[69802,69875]  
tgggaattagccaagttggtaaggcactggattttgattccaggatgcaa  
aggttcgagtcctttattcccagc

>JQ245707.1 Cyanophage S-TIM5, complete genome

1-1tRNA-Pro(tgg)[15402,15476]  
cgggaattagcgcagtttggtagcgcgctgcttgggagcaggatgcca  
caggttcaaatcctgtattcccagc  
1-2tRNA-Arg(tct)[17047,17122]  
tggttcagtagctcagttggatagagcaactgccttctaagcagtcggtc  
gctggttcgagtcagcctgaatcgt  
1-3tRNA-Ile(tat)[23166,23237]

gggactgtcgctaaaggtaaaggccctctgcttataacggagtgatctg  
ggttcaagtcaggcagtccta  
1-4tRNA-Met(cat)[23240,23314]  
gtcctttagcaatctggtagatgcagcgaactcataattcgcctaaggt  
gtgtcgatccacacaaggagcacc  
1-5tRNA-Leu(taa)[23322,23405]  
gcgagtatggcggaatcggtagacgcaccagacttaaaatctgttgggca  
ttagcccggtgggagttcaagtcctcactcgca  
1-6tRNA-Asn(gtt)[26444,26515]  
tcccaagtagctcagtggcagagcccgactgttaatcggtggtcgct  
ggttcaaatccagccttgggag  
1-7tRNA-Thr(tgt)[26519,26591]  
gcctacctagctcagctggtagagcaggcctttgtaaagctcaggtcgt  
cggttcaagtcgctcggtaggct  
1-8tRNA-Leu(tag)[26911,26996]  
tgcgcaagtggcggaattggtagacgccaggttttagttacctgtgccc  
tagtggcgtgaaggttcaagtccttcttgcgcac  
1-9tRNA-Gly(tcc)[27617,27689]  
gcggagttagttcagcggtagaacgctatcctccaagttagatgtcgtc  
ggttcgattccgatactccgctc  
1-10tRNA-Val(tac)[28879,28952]  
tgcaagattagctcagcggtagagcatctgttacaccgaggcggtcgg  
cggttcaatccgctcatcttgcac

>HE815464.1 Campylobacter phage CP21 complete sequence

1-1tRNA-Thr(tgt)c[166676,166751]  
gcctgattagctcaactggtagagcattcgcttgaagcgaaaggttga  
gagttcgagtctctcattaggtcca  
1-2tRNA-Pro(tgg)c[167466,167543]  
cggggtgtagcgagctgtgtagcgacttggttgggaccaagggggcc  
gaaggttcgaatccttccacccgacca

>HE983845.1 Pseudomonas phage vB\_PaeM\_C2-10\_Ab1 complete genome

1-1tRNA-Gln(ttg)[21995,22068]  
tgccgcttcgttcaatggtaggacgccagacttgaatctggagatgatg  
gttcgatcccatcagtggtgcca  
1-2tRNA-Arg(tct)[22274,22349]  
gctcatatagttaatggacagcacacggcttctaagccgtaaggtct  
aggttcgaatcctagtagagcgcca  
1-3tRNA-Lys(ttt)[22357,22433]  
tggacggaagctaaagtggatcagcatctggcttttaaccagacttatag  
tgagttcgagttcaccggttcaacca  
1-4tRNA-Leu(tag)[22695,22779]  
ggccctgtggtggaattggtatacacatcagtttagaaactgacgccga  
gaggattgagggttcaagtcctccggggccacca  
1-5tRNA-Ile(gat)[22986,23061]

agccggatagctcaattggtagagcaccgaccgataatcggatggtga  
 aggttcaagtccttctctggctacca  
 1-6tRNA-Asp(gtc)[23071,23149]  
 ggccattagctcagtcctggactagagcaagcccctgtctagggaaggt  
 cgtcggttcgaatccgacatgggtcgcca  
 1-7tRNA-Met(cat)[23250,23324]  
 agcgttaagactagctggagctgtcactcggctcataaccgaatacaagt  
 ggttcgattccacctctcgcttcca  
 1-8tRNA-Cys(gca)[23561,23636]  
 ccctcgttggccgagaggatcaggcagcagattgcaaatctgccatacat  
 cggttcaaatccgatacagggtccta  
 1-9tRNA-Asn(gtt)[23646,23722]  
 tccgtacggcccatcaaggcgtggggctcggtgttaaccgaaacgcgc  
 taggttcgattcctaggtacggagcca  
 1-10tRNA-Pro(tgg)[23785,23862]  
 ctctcgtagctcagtcctggtagagtgtcggatttggaaatccgaaggtc  
 gaaggttcaaatcctccgggtgacca  
 1-11tRNA-Gly(tcc)[23870,23946]  
 gcgggttctgtatagctcgttattattcttggtccaccaagagact  
 agggttcgaatccctaagcccgacca  
 1-12tRNA-Phe(gaa)[24009,24084]  
 gcgtctgaagctaactaggtagaagcaccgggttgaaatccggaggact  
 tggatcgttaccgaagcggcgacca  
 1-13tRNA-Glu(ttc)[24091,24166]  
 gcagttatagattaaatggataaatcgccagactttcaatctggtgtcc  
 ggggtcgaatcccggttaactgtcca  
 1-14tRNA-His(gtg)[24227,24301]  
 gtggagattgtgtagcccgatgctgccttcggtgtgaccgattgtt  
 ggggttcgagtcctccctcaacc  
 1-15tRNA-Thr(tgt)[24488,24562]  
 gcccttaagcatttatggtgatgcaccggctttgtaaccggcgaattc  
 tgttcaagtcaaggaatgggcacca  
 >HE600015.1 Dickeya phage vB\_DsoM\_LIMEstone1 complete genome  
 1-1tRNA-Met(cat)[12994,130070]  
 gatggtgtagttcagttggttagaacgtgcgactcataatcgctttgtca  
 ctggttcaagtcctgcccatcgcca  
 >JQ177062.1 Bdellovibrio phage phi1422, complete genome  
 1-1tRNA-Pro(tgg)[15181,15256]  
 cggggattggagaagttggagttctcgcgtttttgggaacatgagatc  
 acaggttcaaatcctgtatccccgac  
 >JQ031132.1 Enterobacteria phage vB\_EcoM-FV3, complete genome  
 1-1tRNA-Pro(tgg)c[61201,61277]  
 ctccgcgtagctcagcttggtagagcgctgatttgggatcaggaggtcg  
 agtgttcgaatcactccgtggagacca

1-2tRNA-Met(cat)c[61289,61363]  
ggccctgtagctggaaggtcaagcaagcgactcataatcgccagacggt  
ggttcaattccaccagggccacca  
1-3tRNA-Thr(tgt)c[61365,61440]  
gctgatgtagcacaattggtagtgaattgattgtaataataggttgc  
agggtcagtcctgctatcagcacca  
1-5tRNA-Ser(tga)c[61643,61733]  
tgagggtaggagcaatggtgctcaagcgtcttgaaccgtcccgttg  
aggatgactcgatgatggttcgattccattaccctcagcca  
1-6tRNA-Tyr(gta)c[61848,61934]  
ggggagtatcccgtagaggtagcgggtgtagactgtaaatctattgtcat  
tgcgactcgggtggttcgactccaccactccccacca  
1-7tRNA-Arg(tct)c[61939,62013]  
gccctgtagcttagtgataaagcagcgcccttctaagccgttgacact  
ggttcgagtcagtaggggtgcca

>JQ513383.1 Enterobacteria phage vB\_KleM-RaK2, complete genome

1-1tRNA-Leu(taa)[176487,176574]  
ggccgtatgtccaaattggtaaaggagacagacttaaaatctgttggtga  
tattcaccttctcgattcgagtcgagtcgcgctacca  
1-2tRNA-Gly(tcc)[176941,177016]  
gcgggtatcgataaaggctattacctcggttttccaaaccgatgatgag  
ggttcgacgtccctctaaccgtcca  
1-3tRNA-Arg(tct)[178303,178376]  
gtccccttagttcagttggatagaacaactgccttctaagcagtaggtca  
ctggttcgagtcagtaggggata  
1-4tRNA-Ser(gct)[178529,178617]  
tagtgagttggatgagtggtgaaatcaccaccctgctaaggtggcatat  
gcgaaagcgtatcgtgggtcgaatcccacactcactgt  
1-5tRNA-Ser(tga)[178680,178767]  
ggaaggatggccgagtggtttaaggcactggtcttgaaccagcaatcc  
gaaagggttctagagttcaaatctctatcctccacca  
1-6tRNA-Met(cat)[178885,178962]  
ggccctttactctcaagtgggttagagaatccgactcataatcggtaggct  
ctgagttcgaatctcagaagggccacca  
1-7tRNA-Asn(gtt)[179699,179772]  
gactctgtagcacaatcgggtgctgattgactgttaataatggttgg  
ggattcgagttcctccagagtcgc  
1-8tRNA-Thr(tgt)[182045,182119]  
accgccttagaacaattggtagtgaactgattgtaatacagtaggtta  
tatgttcgagtcagataggtggcac

>JX123262.1 Aeromonas phage CC2, complete genome

1-1tRNA-Leu(taa)[197457,197549]  
gcgtgagtggcgaagttggtgaaacgcacgcgacttaaaatccgatact  
gcataatggcacatcgtgggttcgattccacctcacgcacca

1-2tRNA-Arg(tct)[198613,198689]  
gcgctgtagctcagttggatagagcaacgttcttctaaagcgtgggtca  
ctggttcgaatccagtagcgccacca

1-3tRNA-Leu(tag)[198690,198773]  
cgggatgtggtgaaattggcagacacactagatttaggtctagcgccat  
aggcgtgacggttcgagtcctccatcccgacca

1-4tRNA-Gly(tcc)[198775,198850]  
gcgggtaaggtgttatggatacatgcaagcctccaagtttgagtagac  
cggatcgttaccggctacccgctcca

1-5tRNA-Met(cat)[198935,199011]  
ggccccttagctcagttggtagagcagccgactcataatcggttggtca  
ctggttcgagtcagtaggggccacca

1-6tRNA-Met(cat)[199377,199454]  
agcggggtggagaagtgcaggagttctcaccagactcattatctggaaatc  
ggtggttcaaataccactcccgctcca

1-7tRNA-Asn(gti)[199456,199532]  
tggcgtgtaactcagtaggttagagtgccggactgttaatccgtatgtcg  
tgggttcgaatcccacctcgccagcca

1-8tRNA-Tyr(gta)[199538,199628]  
ggatgttcggctacgatggcggtagcggcgactgtaaatccgttccc  
tctgggtaacaagttggttcgaatccaacagcatccacca

1-9tRNA-Pro(tgg)[199782,199857]  
cgggtattagcgcagttggtagcgcgtctggttgggaccagagggtcac  
aggttcgagtcctgtatcaccgacca

1-10tRNA-Thr(tgt)[200134,200209]  
gccgggttagctcagttgatagagcgacggtcttgaatccgtaggtcgt  
gggtttgagtcacactcggctcca

1-11tRNA-Trp(cca)[200764,200838]  
agggtgttagtatagtggtattatgccggattccaaatccgtgcgactgg  
ggttcgaatcctcaacgccctgcca

>JX878671.1 Staphylococcus phage JD007, complete genome

1-1tRNA-Asp(gtc)[50343,50418]  
tggctcattggtgtaactggttaacacactgccctgtcacggcagagagt  
acgagttcgagtcctgtatgggtcgt

1-2tRNA-Phe(gaa)[50424,50496]  
ggtttcttagctcagatggttagagcactagattgaagctctaggtgtcat  
tggttcaaataccaatagaaccca

1-3tRNA-Trp(cca)[50503,50574]  
acacccttagtataattagtagtacaagggtctccaaacccttagtctt  
tgtgcaaatcaaagagggtgtg

1-4tRNA-Met(cat)[72975,73046]  
ggactcttagcttaaaggtaaagccaaccgctcataacggttgactgta  
ggttcgagtcctgcagagtcca

>HQ832595.1 Pseudomonas phage PaP1, complete genome

1-1tRNA-Gln(ttg)[20964,21037]  
tgccgcttcgttcaatggtaggacgccagactttgaatctggagatgatg  
gttcgatcccatcagcggctgcca  
1-2tRNA-Arg(tct)[21243,21317]  
gctcgtatagttaacggatgcacaacggtcttctaagccgtaaggtcta  
ggttcgaatcctagatagagcgcca  
1-3tRNA-Lys(ttt)[21325,21401]  
tggacggaagctaaagtggatcagcatctggcttttaaccagacttatag  
tgagttcagatctcaccgttcaacca  
1-4tRNA-Leu(tag)[21665,21749]  
ggccctgtggtggaattggtatacacatcagcttagaaactgacgccga  
gaggattgagggttcaagtcctccggggccacca  
1-5tRNA-Ile(gat)[21963,22038]  
agccggaatagctcaattggtagagcaccgaccgataatcggatggttga  
aggttcaagtccttctctggctacca  
1-6tRNA-Asp(gtc)[22048,22126]  
ggccattagctcagctctggactagagcaagcccctgtctagggaaggt  
cgtcgggtcgaatccgacatgggtcgcca  
1-7tRNA-Met(cat)[22227,22301]  
agcgtaagactggctggcgtgtcactcggctcataaccgaatacaagt  
ggttcgattccacctctcgctcca  
1-8tRNA-Cys(gca)[22537,22612]  
cccgcgttggccgagaggttagcgcggttgcaaatccgtctcatat  
cggttcaaatccgatacgcggctcca  
1-9tRNA-Asn(gtt)[22623,22698]  
tgggatgtagctcagttggtagagcaggagctgtaactctcaggtcgc  
aggttcgagccctgccgtcccagcca  
1-10tRNA-Pro(tgg)[22762,22839]  
ctctcgtagctcagctcgttagagtgctgatttggaatcagaaggtc  
gaaggttcaaatccttcgggggtgacca  
1-11tRNA-Gly(tcc)[22846,22921]  
gcgggtatagctcagttggtagagcgtctgcctccaagcagttcgtcgt  
cggttcgagtcgtctatccgtcca  
1-12tRNA-Phe(gaa)[22928,23004]  
gggactgtagctcagaaggttagagcgggtgattgaaatcccacaggtc  
ggcgttcgattcggccgggtcccacca  
1-13tRNA-Glu(ttc)[23011,23086]  
gcagttatagattaaatggttaaatcgccagactttcaatctggtgtcc  
gggttcgatccccggttaactgtcca  
1-14tRNA-His(gtg)[23147,23221]  
gtggagattgtgtagcccgatgctgccttcggtgtgacccgattgtt  
ggggttcgagtcggcctccaacc  
1-15tRNA-Thr(tgt)[23408,23482]  
gccctttaagcatttatggtgatgcaccggcttgaacccggcgaattc

tgttcaagtcaggaatggggcacca  
 >JF974288.1 *Synechococcus* phage S-RIM8 A.HR1, complete genome  
 1-1tRNA-Gly(tcc)[13713,13787]  
 cgggatgtaattcagtggtagaatgtcagccttccaagctgaacgtcagg  
 gggtcagagtccttatccgtcca  
 1-2tRNA-Val(tac)[13788,13859]  
 gggcgattaactcagcggtagagtcctcgtttacaccgagtatgtcggg  
 gggtcgaatccctcatcgccca  
 1-3tRNA-Leu(taa)[18355,18440]  
 tgggacgggtggcgaatcggtagacgcaccagactaaaatctgttgggc  
 aatagcccgtgagagttcaagtctctcgtcctat  
 1-4tRNA-Thr(tgt)[19096,19172]  
 gcctccgtagctcagctggatagagcaacggtttgtaaaccgtaggctcg  
 tcggttcaagtcgaccgtgggtcca  
 1-5tRNA-Ala(tgc)[19173,19245]  
 ggggaattagctcagttggtagagcgctgttgcaagcaggatgtcag  
 cgggtcagtcgctatttcca  
 1-6tRNA-Asn(gtt)[19270,19344]  
 ttctctatagctcagtcggtagagcgtttgactgttaatcaaaatgtcc  
 ctggttcgagcccaggtggaggagt  
 1-7tRNA-Arg(tct)[156607,156682]  
 tgggtcagtagctcagttggatagagcaactgccttctaagcagtcggtc  
 acaggttcgagtcctgtctgacctgt  
 1-8tRNA-Pro(tgg)[157690,157764]  
 cggggtgtagcgcagcttggtagcgcggttgcttgggagcaataggtcg  
 caggttcgaatcctgtcaccggac  
 >HE956709.1 *Yersinia* phage phiR1-RT complete genome  
 1-1tRNA-Gly(tcc)c[72343,72418]  
 gcagagttcgtagtggttaatactattggttccgccagtaaaca  
 cgggtcgaatccgatactctgtcca  
 1-2tRNA-Trp(cca)c[72671,72745]  
 aggtcttagtatagtggcgattatgctaggctccaaacctagtgacggg  
 gttcgattacccaaggcctcca  
 1-3tRNA-Arg(tct)c[74027,74103]  
 gtctcatagctcaacaggacagagcaacggtcttctaaaccgtagggtg  
 ctggttcgattccagctggggacacca  
 1-4tRNA-Met(cat)c[74902,74978]  
 ggcccttagctcagatggttagagcagtcgactcataatcgattgtca  
 ctggttcaaatccagtaaggccacca  
 >JX181829.1 *Salmonella* phage SKML-39, complete genome  
 1-2tRNA-Ser(gct)c[145196,145284]  
 ggaaggttccccgagaggtttaagggactcgactgctaatacagtggggc  
 ttttagccccgaaggttcgaatccttcacctccgcca  
 1-3tRNA-Asn(gtt)c[145768,145843]



gatggtagttcagtcggtagaacggcggtctgttaaatcgtagtcgc  
aggttcaaactcctgacaccatcgcca  
1-4tRNA-Arg(tct)c[147533,147608]  
tgttccctagctcaattggatagagcataggatttctaactccttggtt  
gcaggttcgaatcctgcgggaaacgt  
1-5tRNA-Met(cat)c[147620,147696]  
ggcctgtagctcagtcggttagagcagtcgactcataatcgattggta  
ttggtcaaaccatcaggatcacca  
>HQ918180.1 Klebsiella phage KP27, complete genome  
1-1tRNA-Met(cat)[49034,49110]  
ggccccttagctcaataggttagagctaatacactcataatggtaggttcc  
cggttcaagtcacgggagggccacca  
>JX238501.3 Bacillus phage phiAGATE, complete genome  
1-1tRNA-Met(cat)c[119285,119360]  
tgggtctctagcttagtggttaaagctgccagctcataactggaagagag  
ggggttcgaatcccttgggacccatc  
1-2tRNA-Glu(ttc)c[120905,120976]  
gtggtcttagtttaatatagaacagctctgtttcgccagacaggtagcg  
gttcaactcccttagaccaacc  
1-3tRNA-Phe(gaa)c[122052,122126]  
tggactggtagctcagtcggttagagcaggggctgaaaatccctgtgtcg  
gaggttcgaacccttctcagtcctat  
1-4tRNA-Asn(gtt)c[122474,122547]  
ttgtcgataactcaatggttagagtgttactgttaatacaagaattgt  
aggttcgagtcctactacgacagt  
>JX878496.1 Serratia phage phiMAM1, complete genome  
1-1tRNA-Pro(agg)c[19252,19325]  
cgggaagtagtttagcggtaaaacgcaagcacagggtgcttgagtcctag  
gttcgaatcctagactcccggcca  
1-2tRNA-Met(cat)c[19329,19404]  
agtccttagctcagtggttagagcatcgactcataatcgcttggtcgt  
tggttcaaagccaacagggactacca  
1-3tRNA-Cys(aca)c[21050,21141]  
tggccggtagctcaattggttagagtggcgcgctacagcctgagcgac  
attagcgcgatgttgggttcgagaaccaccccgccaccc  
>JQ015307.1 Pectobacterium phage phiTE, complete genome  
1-1tRNA-Cys(gca)[105433,105507]  
gcaacgttgccggagtaggtaacggctctcgctgcaaacgagatgttca  
ctggttcaaatccagtacgttgctc  
1-2tRNA-Leu(caa)[105511,105590]  
gccctctggcccaacaaaaggttagaggctctgcttcaaacggcaggag  
ttcccggttcgaccccgaggaggaccca  
1-3tRNA-Tyr(gta)[106329,106410]  
ggggacgtggcagagcggtcgaatgcactgtactgtaaatcggtatccc

acacgggtggtcgaatccacccggctccacca

>HQ331142.1 Salmonella phage S16, complete genome  
 1-tRNA-Arg(tct)c[61310,61386]  
 cgaggcatagcttaatagatatagagcaacggcttctaaacgtaggttg  
 aaggtagaatccttctgtctcgacca  
 1-2tRNA-Gln(ttg)c[62011,62086]  
 tgggaattagccaagttgtaaggcaccggattttgattccgggatgcac  
 tggtcgagcccagattcccagcca  
 1-3tRNA-Met(cat)c[62093,62167]  
 ggcccttagctcaatgggagagctgtcagctcataactgataggtagct  
 ggatcgaaaccagcaagggccacca

>KC465899.1 Pelagibacter phage HTVC008M, complete genome  
 1-tRNA-Gly(acc)[91140,91213]  
 gcgggtgtggtatagaagtattacgccagttaccaaactggaaatgcag  
 gagcgttacctgccatccgtcca

>HQ634157.1 Vibrio phage 11895-B1 genomic sequence  
 1-tRNA-Tyr(gta)c[103393,103476]  
 ggggtgtgggtgaattgggtaaaccagcagactgtaaactgccgcctc  
 tggcatccaagttcgagcttgggcaaccacca  
 1-2tRNA-Pro(tgg)c[103479,103555]  
 ctccgtagctcagtttggtagagcgcatcattgggatgatgaggtct  
 gatgttcaaatcatcatcgaggacca

>HQ316583.1 Cyanophage S-SSM4 genomic sequence  
 1-tRNA-Val(tac)[1514,1585]  
 gggagattagctcagcggtagagctattcgtttacaccgaatcggtcatt  
 ggttcaagtccaatatctcca  
 1-2tRNA-Leu(taa)[6709,6790]  
 gggagcatggcggaatcggtagacgcatcgacttaaaatccgctgaggt  
 aactcgtgggggttcaagtccccctgctccta  
 1-3tRNA-Arg(tct)[150850,150924]  
 tggtcagtagctcagcggaaagagcaactgccttctaagcagttggcca  
 taggttcaaatcctatctggatcgt

>JQ797329.1 Listeria phage vB\_LmoM\_AG20, complete genome  
 1-tRNA-Met(cat)c[25833,25906]  
 ttgtcccgtagctagaaggtcgagcaaggagctcataactcctcggtttg  
 ggttcgattcccaacggggcaatc  
 1-2tRNA-Pro(tgg)c[26799,26873]  
 cagggttagctcagtttggtagagtacccgcttggagacgggaagtc  
 gtaggttcgaatcctaccacctga  
 1-3tRNA-Arg(tct)c[27991,28061]  
 gtcttatggtgtagcggatgcacaagggttctactcccttagcgcgg  
 gttcgaatcctgctgaggact  
 1-4tRNA-Gly(tcc)c[28319,28389]  
 gcgggtatagtataagggtagtagccaaggtttccaacctgtagtgggg

gttcgaatccccctaccgct  
 1-5tRNA-Asn(gtt)c[28458,28531]  
 gtgtccttaactcagaggtcagagtgccgtcctgtaagtcggaagtcgc  
 tggttcaatccagcaggatacgc  
 1-6tRNA-Ser(tga)c[28541,28632]  
 ggaagggtgtagagcttggaatacgcctgcttgaactagtttacc  
 cttggaatacagggtacaagggttcgaatcccttaccttcct  
 1-7tRNA-Phe(gaa)c[28645,28716]  
 gtagtcctagctgagatggattagcgttgcttgaagcaagcgaggca  
 ggttcgatacctcggactcca  
 1-8tRNA-Lys(ttt)c[28722,28793]  
 ggagttatggtgaaatggctatcactgcgggttttaccctgtattcta  
 ggttcgaatcctagtggtcca  
 1-9tRNA-Trp(cca)c[28918,28991]  
 taggggtgtagtttatctggtaaaatattggttccaactccaatgaggt  
 ggggtcaagtcctactatccctgt  
 1-10tRNA-Gln(ttg)c[28993,29065]  
 tggctgtgaaccaagcggtgaaggcaacggatttgattccgtgatacgtt  
 ggttcgagtccaactagaccagc  
 1-11tRNA-Thr(tgt)c[29084,29155]  
 gcttgtagtcaattggtagaacagtgggtttgtaagcctcagcgtg  
 ggttcaagtcctactacaagca  
 1-12tRNA-Tyr(gta)c[29237,29318]  
 gtgccattcgcatagtggaattgcaggggactgtaactcccctcccttc  
 ggggttccaaggttcgagtccttgatggcaca  
 1-13tRNA-Leu(tag)c[29639,29723]  
 tgccgagatggtggaactggtatacaggtagacttagaatctattgtcc  
 caaggatatgtgggttcgaatcccactctcggat  
 1-14tRNA-Asp(gtc)c[30189,30261]  
 gtgcgtatgatataatggctattatactcgactgtctatcgagaaatagg  
 ggttcaattccccttacgtgcgc  
 1-15tRNA-Ile(gat)c[30365,30437]  
 gccagcatagcttagtaggcaaagcaaccgaccgataatcggtagtcctt  
 ggttcaattccaagtgttggtac  
 1-16tRNA-Ser(gct)c[30614,30700]  
 ggagagttgtcagagaggcttaatgatacgggttgctaactcgttgact  
 agtaatagtlaccaagggttcgaatcccttactctcct  
 1-17tRNA-Cys(gca)c[30779,30849]  
 gcgggtataaccaactggaaaggtagtagactgcaaatctacgtatatgg  
 gttcaattcccattaccgct

>HQ634193.1 Cyanophage P-RSM6 genomic sequence

1-tRNA-Leu(taa)c[38808,38883]  
 tgggagtgtagcccaatcggcagaggcagcagacttaaaatctgcacagt  
 gtgggttcgaatcccaccactcctat

1-2tRNA-Arg(tct)c[38885,38960]  
tgactcagtagctcagtggaacaagagcatcgctcttctaaagcgttggtc  
gtaggttcgaatcctacctgagtcgt  
1-3tRNA-Ile(tat)c[38964,39037]  
gggactatcgctattggtaaggctcactgcttataacggcggaactg  
ggttcgattcccagtagtcctacc

>JX094431.1 *Bacillus cereus* bacteriophage vB\_BceM\_Bc431v3, complete genome

1-1tRNA-Met(cat)c[155868,155942]  
taggattatagctcagtggtagagcgtgggtctcataagcccagggtcga  
tggttcgatcccatctattcctatc  
1-2tRNA-Leu(tag)c[156094,156178]  
tgtcgaagtgttgaactggatacatgcggcacttaggatgccgtgcct  
tcgggattgtgggttcgactcccaccttcgacatc  
1-3tRNA-Ile(gat)c[156186,156262]  
actagtgtagctcagtcaggtagagcagtgcttgataaggcattggta  
caggttcgaatcctgtcactagtagca  
1-4tRNA-Leu(taa)c[156266,156352]  
atcggagtggtggaattggtagacatatggcacttaaaatgctatgtccg  
tatggacgtaagggttcgagtccttctccgatacca  
1-5tRNA-Tyr(gta)c[156356,156438]  
gggcgtgcaatcattggagagataagctgactgaaatcagtggtcattg  
actgtggaggttcgaatcctccattcccacca  
1-6tRNA-Phe(gaa)c[156445,156519]  
ggacagatagctgagacggattagcgattggctgaaaaccaatagagggt  
ggatcgttaccaactctgtccacca  
1-7tRNA-Pro(tgg)c[156620,156692]  
acgggtgtaggctagaggtcagtcactgcgtttggggcgagatcacgtt  
ggttcgatccaaccactcgta  
1-8tRNA-His(gtg)c[156701,156774]  
cagtggtggtgaagtggcttaacacggacgactgtggatcgtctattcg  
ctggttcgaatccagtcattgctga  
1-9tRNA-Gln(ttg)c[156851,156927]  
tttcggagtggaactggtaaagtcgcttggtttgacccaagagcgt  
gaaggttcgaccccttctccgaagtc  
1-10tRNA-Ser(tga)c[157005,157094]  
cggggaataactcaagtggataaaagaggttagtcttgaaaactaatagc  
gtgtgaaagcgtgcgggggttcgaatccctcttctcggc  
1-11tRNA-Arg(tct)c[157152,157227]  
taccctttagccaagtggactaaggcaacgggcttctatcccgtggatc  
gtgggttcgattcctacaggggtgt  
1-12tRNA-Ile(tat)c[157347,157420]  
atccctttagccaagcgggttaaggcagtaggattatgtcctacgtatcgg  
gagttcgaacctccaagggcgc  
1-13tRNA-Asp(gtc)c[157422,157495]

tggggatatagtgtagtggtaaacacgcacggctgtctaccgtgaagcac  
gggttcgaatcccgttatcctcgt

1-14tRNA-Glu(ttc)c[157499,157575]

gtcgatttggtgaaattggctaacacactcggctttctaccgagcattca  
gggttcgaatcccctatcgatacca

1-15tRNA-Asp(gtc)c[157585,157659]

ggcttgtagtatatgggttaacacacttgcctgtcacgcaagagaaacg  
ggttcgagtcctgtacaggccgcca

1-16tRNA-Thr(tgt)c[157665,157741]

gccttctagctcagttggtagagcgactgccttgaagcagtaggtcg  
tgggttcgattcctacagtcggcacca

1-17tRNA-Gly(tcc)c[157746,157821]

ggggcattagtatatcggttaattattcctggctccaaccaggggaggt  
cgggttcgattccgacatgtccctcca

1-19tRNA-Cys(gca)c[158134,158206]

gaggacgtaccgaaatgggttaacgggctaggtgcaaccctagatttcgc  
tgggtcgaatccagtcgttctct

1-20tRNA-Ser(gct)c[158216,158304]

ggaagggtactcaagttgggaagaggtcaacctgctaagttgatagtac  
ctattgtaggtagcgagggttcgaatccctttccttct

>JX561091.1 Escherichia phage phAPEC8, complete genome

1-1tRNA-Met(cat)[59143,59217]

ggccctgtagctcaatgggagagctgtcggctcataaccgatagtagct  
ggatcgaaaccagccaggccacca

1-2tRNA-Arg(tct)[59220,59294]

gtctttatggtgtaatggatagcacaggagcttctaaactcttagtcaa  
ggttcgattccttgtaaacacacca

1-3tRNA-Ser(gct)[59624,59709]

ggtagattggtgaaatggtagccacgacagtttgctaaactgtagtcgga  
aacggcgtgtaggttcgagtcctacatctaccgcca

1-4tRNA-Tyr(gta)[59837,59920]

gtgagattggcagagtggtcgattcgggggactgtaaatcccttctgaa  
aggcgcgggtggttcgaatccatcatctcacacca

1-5tRNA-Asn(gtt)[59927,60012]

gatgagttggctgaatgggttaagcggcggaactgttaatccgtgttcgaa  
agaacgatataggttcaaatctatactcatcgcca

1-6tRNA-Thr(tgt)[60103,60177]

gctcctatagtataatggctattacaacggttttgtaatccgtggatctc  
tgttcgattcagagtgaggacacca

1-7tRNA-Gly(tcc)[60494,60567]

gcgttcttggtgtagcggtagcattccgtcctccaagtcggcggcacga  
gttcgatcctcgtagaacgtcca

1-8tRNA-Gln(ttg)[60666,60741]

tggttttagtgtagtcggtagcacacgacatttgactgtcgtagggt

tggttcaatccagacagaccagcca  
1-9tRNA-Pro(tgg)[60835,60911]  
cggaaattagctcagtttgtagagtgtacgcttgggagcgattgtcg  
caggttcgaatcctgcaattccgacca  
1-10tRNA-Ile(gat)[60918,60991]  
tgtttcgtagttcaatggtagaaccacgactgataatcgtgagatacaa  
gttcgattcttgtcgaaacaacca  
1-11tRNA-Met(cat)[61070,61148]  
agcgggatagaggagtctggctcctcgccagttcatatgctggagat  
cattggttcaatccaattcccgcctcca

>HQ634177.1 Synechococcus phage S-CAM1 genomic sequence

1-1tRNA-Asn(gtt)c[74005,74080]  
ttcctctatagctcaatcaggcagagcgggtgactgtaataataggtt  
cctgggtcgattccaggtggaggagt  
1-2tRNA-Ala(tgc)c[74130,74203]  
ggggaattagctcagctggtagagcgctgttgaagcaggatgtcag  
gagttcgagtcctattctccac  
1-3tRNA-Leu(tag)c[74805,74886]  
gtcgatgtggcggaattggtagacgcgctgggttaggttccagtgatt  
tatccgtggagggtcaagtctctcatcgaca  
1-4tRNA-Thr(tgt)c[74890,74963]  
gcctgttagctcagctggtagagcaacgctttgtaaagcgtaggtcgt  
cagttcaagtctgtcaacaggctc  
1-5tRNA-Leu(taa)c[75783,75866]  
ggggcagtggtggaatcggtagacacaccagacttaaaatctgtgacct  
taaggctgtgcgagttcaattctcgttgccta  
1-6tRNA-Gly(tcc)c[106145,106215]  
gcgggattagtttagaggcaaaactaaagttccaacctttcgtcacca  
gttcgattctggtatcccgt  
1-7tRNA-Val(tac)c[108518,108589]  
gggcgattagcgcagcggtagcgcacctcctttacacggagagggtcggg  
ggttcgattccctcatcgcca  
1-8tRNA-Arg(tct)c[108590,108665]  
gggcacgtagcataatggataatgcatcactcttctaaagtcccattgc  
tggttcgagtcagccgtgcctgcc

>HQ317292.1 Synechococcus phage S-RIM2 R1\_1999, complete genome

1-1tRNA-Val(tac)[13794,13865]  
gcccgaatagctcagcggtagagcacctcgtttacaccgagattgtcggg  
ggttcgatcccctcttcgggca  
1-2tRNA-Leu(taa)[17791,17877]  
tgggagtatggcggaatcggtagacgcaccagacttaaaattgttgagg  
gttaacctcgtgagagttcaagtctctactcctat  
1-3tRNA-Thr(tgt)[17934,18006]  
gccccgtagctcagtggttagagcagggtttgtaaagctcaggtcgca

agttcaaatctgtcaggggctc  
1-4tRNA-Ala(tgc)[18009,18081]  
ggggaattagctcagttggtagagcgctgcttgcaagcaggatgtcag  
cgggtcagatccgctattctcca  
1-5tRNA-Asn(gtt)[18128,18201]  
ttctcagtagctcagcggcagagccatcgactgttaatcgattggctgt  
aggttcaaatcctacctggggagt  
1-6tRNA-Arg(tct)[161238,161312]  
tgggtcagtagctcagcggatagagcaaccgccttctaagcggttggtcg  
caggttcaaatcctgcctgacccgt

>JX846613.1 Staphylococcus phage vB\_SauM\_Romulus, complete genome

1-1tRNA-Ser(gct)c[126593,126680]  
ggagattactcaagtggcttaagaggttgggttgctaactcaatagggt  
atttattcactcataggttcaaatcctatatgtctccg

>JN377895.1 Aeromonas phage Aes012, complete genome

1-1tRNA-Arg(tct)c[62227,62303]  
ggctcttagctcagtcggatagagtggcggccttctaagccgagggtca  
ttggtcgaatccaatagggactgcca  
1-2tRNA-Met(cat)c[62872,62947]  
ggccctctgcacagtctgtaatgtgtccagctcataactgggtaagcc  
gggttagattcccggaggggccacca  
1-3tRNA-Met(cat)c[63150,63226]  
tgcaccgtagaggagaggccgtcctcgccagctcataagctggagatcg  
tgagttcgaatctcaccggagcatcca  
1-4tRNA-Asp(gtc)c[63239,63312]  
ggagccatagtttatttggttaaatagtcccctgtcacgggacagcacc  
gagttcgatcctcgggtggctccgc  
1-5tRNA-Trp(cca)c[63386,63460]  
aggggtgtagtgtaatggtagcacgccgcctccaaagccgtgtagtctg  
gattcgaattctagcatccctgcca  
1-6tRNA-Thr(tgt)c[63821,63896]  
gccggttagctcatttggtagagcacttcacttgaatgatgggtggt  
ccgttcgaatcggacaaccggcacca  
1-7tRNA-Pro(tgg)c[64154,64228]  
ctcagcgtaggcaagtgggtatgtcgttccgttgggacggaattttcggg  
tgttcgattcaccgctgagacca  
1-8tRNA-Gly(tcc)c[64943,65018]  
gcgggtaagggtttatggatacacgctagcctccaagcttgagtagac  
cgggtcgataccggctaccgctcca  
1-9tRNA-His(gtg)c[65030,65105]  
gtgacggtagctcaattggtagagccccggattgtgattccggccgttgc  
gagatcatccctcgtccgtcacccca  
1-10tRNA-Lys(ttt)c[65397,65472]  
gcgtcggtagctaagcggtaaagcacctgacttttaacaggatactcga

tggttcgaatccatcccggcgcacca  
1-11tRNA-Asn(gtt)c[65640,65716]  
ggttgattagctcagttggttagagcggcggactgttaacccgcgggtct  
cccggttcgagtcggaatcaaccgcca  
1-12tRNA-Arg(cct)c[65796,65878]  
ggtgctgtgagccaagcggcttaaggcggctcctaatgcaggacatacga  
agcgatcgtaggttcgaatcctaccagcacc  
1-13tRNA-Ser(tga)c[65885,65976]  
ggagacttgggtgagaggctaaaccaccagcttgaaaactggcgatcg  
taggaatacggatccatccgtcaaacggatagctcgcga  
1-14tRNA-Leu(taa)c[66168,66252]  
gcaagtatggtggaattggtatactggaggctaaaacctcccgcctt  
cgggatttgggttcgagtcctactactgcacca

>KC748970.1 Mycobacterium phage ArcherS7, complete genome

1-1tRNA-Ser(gct)[30783,30866]  
ggagggtgagcatcagtgatgcagcgagattgctaaccgtacggtaa  
ccacccggtgaggttcgaatcctcctccctccgc  
1-2tRNA-Leu(cag)[31059,31134]  
gctcccgtagcccaattggcaggaggcaccagattcaggatctgggcagt  
gtgagttcgaatctcaccgggagtac  
1-3tRNA-Leu(gag)[31254,31328]  
gtctctgtaggcaaatcgaaaagcccatcttgagggggtggtgcgtg  
cgggttcgactcccgcagagacac  
1-4tRNA-Leu(caa)[31329,31402]  
gccgtggtaggccatctggcgagccgccgagttcaagtttcggtgttgc  
gggttcgaatcccgcacggtag  
1-5tRNA-SeC(tca)[67326,67422]  
attctggcactggtggcgagcccaccggcgagcttcaagctgtcgct  
ggccggagaaccgacggaaacatccgttcaacgcgacccagggcc  
1-6tRNA-Pro(tgg)[91290,91361]  
cggggtgtagtaaaaggcatcatgctggtttgggtaccagtgttccg  
gttcgagtcgggtccccgac  
1-7tRNA-Trp(cca)[91800,91875]  
tggggtgaagccgatctggaaggcagcggtctcaaagccgtctcatagc  
gggttcgaatcccgtcacccctgcc  
1-8tRNA-Tyr(gta)[91877,91963]  
gccgcacatcccaactggtgttgggagcaggctgaaccctgtggcct  
tcgggacggtgaggttcgattcctcagtcggtacca  
1-9tRNA-Pyl(cta)[93072,93144]  
gcaccatttgcctaatggcagagcggcggttctaaaaccgtgagtgccg  
gttcgactccggcatggtgcacc  
1-10tRNA-Met(cat)[93294,93368]  
agcgggtgtagagcagctaggtagctcgccgggtcataaccggaggacg  
cgtgttcgaatcacgccaccgccac



1-11tRNA-Cys(gca)[93495,93566]  
gcgcctttggcgggaatggctacgtgctcggtgcaacccgagttatccc  
gttcgactccggaggcgctc  
1-12tRNA-Glu(ctc)[93571,93645]  
ggccgttgagtagatggatatctgccaccctctcaagtgagatca  
cgggttcaagtcccgtacggactgc  
1-13tRNA-His(gtg)[93647,93720]  
gtggccgtagttcagccggtagaacgtgggttgtgatccagtcgtcga  
gggttcgagtcctccggtcacc  
1-14tRNA-Ala(tgc)[93882,93955]  
gggcctatagctcatctggtagagcgctgccttgcaagcaggaggcggc  
aggttcaagtcctgttaggtccac  
1-15tRNA-Phe(gaa)[94145,94217]  
gccgtcatagctcagttggtagagcactggcctgaaaaccagtgccga  
ggttcgattcctcgtgtcggcac  
1-16tRNA-Val(cac)[94223,94296]  
gtccgttagctcagctggaagagcgctcggccacacccgagaggccgc  
aggttcgalccctgcaatggacac  
1-17tRNA-Lys(ctt)[94415,94487]  
gccttcgtagctcagtggtagagctgtgcctttaagcgataggtcgtt  
ggttcgaatccagccggggcac  
1-18tRNA-Glu(ttc)[94492,94568]  
ggtcgggtcggctcgtcgttatggccagtcggatttctactccgacatt  
cgcgggttcaattcccgtcccgatcgc  
1-19tRNA-Gly(tcc)[94648,94720]  
gcgggtgtggccgaatggctcaggcaccagattccactctggctacga  
ggttcgattcctgtcatccgctc  
1-20tRNA-Thr(cgt)[94780,94854]  
gtcgtgtagctcacctggcagagcgtcggcgtcgtatcccgaagcatc  
cgggttcgagtcggacagcagcccc  
1-21tRNA-Thr(tgt)[94855,94927]  
gcctctgtgtccagcggcacggacatccgccttgtaagcggaggacccc  
cgttcgatccgggttagaggctc  
1-22tRNA-Thr(ggt)[95335,95407]  
gtcgggttagctcagtggtagagcgttcctctggtatgggaaaggcccg  
ggttcaatccccgattcagctc  
1-23tRNA-Gly(gcc)[96730,96803]  
gcgaaggtagctcagctggtagagcgccaccttgccaaggtggaggtcgc  
gggatcgtaacccgttcttcgctc  
1-24tRNA-Asp(gtc)[96807,96879]  
ggccctgtagctcagaggaagagcgccggtctgtcgaatcgaggtcgcg  
gtatcgtaatccgtcagggtcgc  
1-25tRNA-Met(cat)[96939,97011]  
gcctcactagctcattggtagagccgctcgtcataacgtgcaggtacct

ggttcgattccaggtgaggtac  
1-26tRNA-Ile(gat)[97017,97091]  
gcctgttagcggactggtcgtccgatccaagctgataactggcgtaagc  
ggtgttcgattcaccgagcaggtac  
1-27tRNA-Arg(acg)[97185,97257]  
gcctctatggtccaacggatatgacgccggtctacggaaccggagatgcg  
tgttcgattcgcgctaggggcac  
1-28tRNA-Val(gac)[97300,97372]  
gtccgtgtagctcagggtagagcgcctgctcgacacgcaggaggaccga  
ggttcgaaacctcgcatggacac  
1-29tRNA-Arg(cct)[97546,97619]  
gcctctgtagctcaacggacagagcaacgcggctctaacgcggtggctgg  
aggttcgaatcctctcggaggcac  
1-31tRNA-Gln(ttg)[98160,98235]  
tggggtatggtggcaatctggcagtcgcccggtcttactccggaggt  
gcagggttcgagtcctgctacccatc  
1-32tRNA-Arg(tct)[98239,98314]  
gccctttagctcagtgacagagcggcgagcttctacctcgccggccgg  
gagttcgaatcctccaggggcacca  
1-33tRNA-Gln(ctg)[126933,127007]  
tgctcgttggtgtaactggcaacactacggactctgactccgtcattta  
ggttcgaatcctaagcgagcagcca  
1-34tRNA-Asn(gtt)[127014,127089]  
tggggtgtccgttaatcaggcaaacgagcggactgttaatccgccctgc  
aggttcgaatcctgccacccagcca

>KC801932.2 Escherichia phage Lw1, complete genome

1-1tRNA-Met(cat)[49530,49607]  
ggccccttagctcaattggttagagcgaaccctcataagggtgtggtt  
ccggttcaagtcacggaaggggcacca

>HQ634178.1 Synechococcus phage S-CAM8 strain S-CAM8 06008BI06, complete genome

1-1tRNA-Val(tac)[14508,14579]  
gcccgaatagctcagcggtagagcagcacctttacacggtgaatgtcggg  
ggttcgatcccctcttgggca  
1-2tRNA-Leu(taa)[18531,18617]  
tgggagtggtgcggaatcggtagacgcaccagacttaaaatctgttgacc  
aataaggtcgtgggagttcaagtctcctactcctat  
1-3tRNA-Thr(tgt)[18671,18743]  
gcctccgtagctcagtggttagagcaggcctttgtaaagctcaggtcgca  
agttcaaatctgtcagaggctc  
1-4tRNA-Asn(gtt)[18748,18819]  
tcctccttagctcagcggtagagcgggtgactgttaataattgtcct  
ggttcgatcccaggagggggag  
1-5tRNA-Arg(tct)[155048,155123]  
tgggtcagtagctcagatggatagagcaactgccttctaagcagtcggcc

acaggttcgagtcctgtctgacccgt

>AP013029.1 Bacillus phage phiNIT1 DNA, complete genome

1-tRNA-Ser(gct)[33425,33513]

tggaataggtacccaagcggtaaaggggtctgggtgctaaccagatagtag

gctgaggtctagcggaggttcgaatcctctcctatccgt

1-2tRNA-Asn(gtt)[33749,33822]

ttgtcccatagctcaatggtagagcggccgactgttaatcggaaggttgc

tggttcgagccagctgggacagt

1-4tRNA-Asp(gtc)[35511,35584]

tggtccatagtcagcgggtaaacacggccgctgtcacgtgggtagcac

gggttcgaatcccgttgagaccgt

1-5tRNA-Tyr(gta)[35750,35833]

gggtgagcggtaacgttgagagttacggcagactgtaaatctgttcct

tcggggtagagtggtcgaatcactccttgcca

>HQ634175.1 Cyanophage P-RSM1 genomic sequence

1-tRNA-Leu(taa)c[39357,39440]

gggagtggtgggaatcggtagacgcaccagacttaaaatctgttgacct

tgagtcgtgggggttcaagtcacccactcctac

1-2tRNA-Arg(tct)c[71616,71690]

tggtcagtagcacagcggatagtgcaactgccttctaagcagtcggtcg

caggttcaaatcctgcctgacccgt

>KC691257.1 Mycobacterium phage Astraea, complete genome

1-tRNA-Ser(gct)[30739,30822]

ggagggtagcatctggtgatgcaggggtcctgctaaggccctacggatt

cacaccgtgagtttcgattactcctccctccgc

1-2tRNA-Leu(cag)[30919,30995]

gccctgctgagcaaatggcaaaagctgccgcattcagagtgcgggtcatt

tccgggttcgactcccgggcagggtag

1-3tRNA-Leu(gag)[31115,31189]

gtctctgtaggcaaatcgaaaagccgcatcttgaggggtggtgcgtg

cgggttcgactcccgcagagacac

1-4tRNA-Leu(caa)[31190,31263]

gccgtggtaggccatctggcgagccgagttcaagtttcggtgttgc

gggttcgaatcccggccacgtac

1-5tRNA-SeC(tca)[66777,66873]

attctggcactggtggcgagcccaccggcgagcttcaagctgtcgt

ggccgggagaaccgaccggaacatcccgttcaacgcgacccagggcc

1-6tRNA-Pro(tgg)[90158,90232]

cggggtagttcagtttgaagagcgttggttgggaccaagtgtcg

caggttcgaatcctgtcaccccgac

1-7tRNA-Trp(cca)[90247,90317]

gggtctgtgcacaggtgcccaggtctcaaagccgaaggcgggggtt

cgattccctccaggcctgcca

1-8tRNA-Pyl(cta)[91509,91581]

gcaccatttgctcaatggcagagcggcggttctaaaaccgtgagtgccg  
gttcgactccggcatggtgcacc  
1-9tRNA-Met(cat)[91731,91805]  
agcgggttagagcagctaggtagctcgccgggtcataaaccggaggacg  
cgtgttcgaatcacgccaccgccac  
1-10tRNA-Cys(gca)[91932,92003]  
gcgcctttggcggaatggctacgtgctcggtgcaacccgagttatccc  
gttcgactccgggaggcgctc  
1-11tRNA-Glu(ctc)[92071,92142]  
gtcccatgggtagtggtaacctcctggttctcagccaggcgtcccga  
gttcgatcctcgtgggagtg  
1-12tRNA-His(gtg)[92197,92270]  
gtgtagtagttcagatggaagaacgtgcctgtgacggcgaaggcgg  
gggttcgaagcccctctatcacc  
1-13tRNA-Ala(tgc)[92941,93015]  
gggcctgtagtccaattggttagagcagcatcctgcaagatgacggctg  
tcggttcgaatccgacctggtccac  
1-14tRNA-Phe(gaa)[93205,93277]  
gccgtcatagctcagttgtagagcactggcctgaaaaccagtggccga  
ggttcgattcctcgtgtcggcac  
1-15tRNA-Val(cac)[93283,93356]  
gtccgttagctcagctggaagagcgctcggccacacccgagaggccgc  
aggttcgatccctgcaatggacac  
1-16tRNA-Lys(ctt)[93475,93547]  
gccttcgtagctcagtggttagagctgtcgcctttaagcgataggctgt  
ggttcgaatccagccgggggcac  
1-17tRNA-Glu(ttc)[93552,93628]  
gttcgggtcggctcgtcgttatggccagtcggattttcactccggacatt  
cgcgggttcaattcccgtcccgatcgc  
1-18tRNA-Gly(tcc)[93708,93780]  
gcgggtgtggccgaatggctcaggcaccagattccactctggctacgca  
ggttcgattcctgtcatccgctc  
1-19tRNA-Thr(cgt)[93841,93915]  
gtcgtgtagctcacctggcagagcgtcggcgtcgtatcccgaagcatt  
cgggttcgagtcggacagcagcccc  
1-20tRNA-Thr(tgt)[93916,93988]  
gcctctgtgtccagcggcacggacatccgccttgaagcggaggacccc  
cggttcgatccgggtagaggctc  
1-21tRNA-Thr(ggt)[94396,94468]  
gtcgggttagctcagtggttagagcgttcctctggtatgggaaagggccgg  
ggtcaatcccccgactcagctc  
1-22tRNA-Gly(gcc)[95791,95864]  
gcgaaggtagctcagctggcagagcgccacctgccaaggtggaggtcgc  
gggatcgtaacccgttcttcgctc

1-23tRNA-Asp(gtc)[95868,95940]  
 ggccctgtagctcagaggaagagcgccggtctgtcgaatcggaggtcgcg  
 gtatcgtaatccgtcagggtcgc  
 1-24tRNA-Met(cat)[96000,96072]  
 gcctcactagctcattggtagagcgcctcgtcataacgtgcaggtacct  
 gggtcgattccagggtgaggtac  
 1-25tRNA-Ile(gat)[96078,96152]  
 gcctgttagcggactggctcgtccgatccaagctgataactggcgtaacg  
 ggtgttcgattcaccgagcaggtac  
 1-26tRNA-Arg(acg)[96246,96318]  
 gcctctatggccaacggatatgacgccggtctacggaaccggagatgcg  
 tgttcgattcgcgctaggggcac  
 1-27tRNA-Val(gac)[96361,96433]  
 gtccgttagctcaggggtagagcgccctgctcgacacgcaggaggaccga  
 gggtcgaaacctcgcatggacac  
 1-28tRNA-Arg(cct)[96608,96681]  
 gcctctgtagctcaacggacagagcaacgcggctctaacgcggtggctgg  
 aggttcgaatcctctcggaggcac  
 1-30tRNA-Gln(ttg)[97222,97297]  
 tggggtatggtggcaatctggcagtcgcccggtcttgactccggagggt  
 gcaggttcgagtcctgctaccccatc  
 1-31tRNA-Arg(tct)[97301,97376]  
 gccctttagctcagtggtacagagcggcgagcttctacctcggggcccgg  
 gagggtcgaatcctcaggggcacca  
 1-32tRNA-Gln(ctg)[124792,124866]  
 tgctcgttggtgtaactggcaacactacggactctgactccgtcattta  
 gggtcgaatcctaagcgagcagcca  
 1-33tRNA-Asn(gtt)[124873,124948]  
 tggggtgtccgttaatcaggcaaacgagcggactgttaatccgccctgc  
 aggttcgaatcctgccacccagcca  
 >HQ317383.1 Synechococcus phage S-IOM18 genomic sequence  
 1-1tRNA-Val(tac)[4930,5003]  
 tgggcgaatagctcagcggtagagctactcgttacaccgagtcggtcgg  
 gggttcgatcccctcttcgccat  
 1-2tRNA-Leu(taa)[9367,9452]  
 tgggagcgtggcgaatcggtagacgcaccagactaaaatctgttgggc  
 aatagcccgtgagagttcaagtcctccgttcctat  
 1-3tRNA-Thr(tgt)[9697,9770]  
 gccccgtagctcagtggttagagcaggcctttgtaaagctcaggtcgca  
 agttcaaatctgtcaggggtcc  
 1-4tRNA-Ala(tgc)[9772,9847]  
 tggggaattagctcagttggttagagcgctgttgcaagcaggatgtca  
 gcggttcgagtcgctatttcctac  
 1-5tRNA-Asn(gtt)[9897,9968]

tcccaagtagctcagtggcagagcaggtgactgttaatcactcggtcgca  
ggttcaaactcctgccttgggag  
1-6tRNA-Arg(tct)[147052,147126]  
tgggtcagtagctcagcggatagagcaactgccttctaagcagttggtcg  
caggttcaaactcctgcctgactcgt  
1-7tRNA-Pro(tgg)[148131,148204]  
cggggtgtagcttagcttggtagagcggccttgggagcgggaggtcg  
caggttcaaactcctgccaccccgga

>JX126918.2 Listeria phage LP-125, complete genome

1-1tRNA-Met(cat)c[35284,35357]  
ttgtcccgtagctagaaggtcgagcaaggagctcataactcctcggtttg  
ggttcgattcccaacggggcaatc  
1-2tRNA-Pro(tgg)c[36250,36324]  
caggggtgtagctcagtttggtagagtacccgcttggagacgggaagtc  
gtaggttcgagtcctaccaccttga  
1-3tRNA-Arg(tct)c[37442,37512]  
gtccttatggtgtagtggatgcacaagggttctactcccttagcgcgg  
gttcgaatcctgctgaggact  
1-4tRNA-Gly(tcc)c[37770,37840]  
gcggttagtagtataagggtagtagtaccgaaggttccaacctgtagtgggg  
gttcgaatccccctaccgct  
1-5tRNA-Asn(gtt)c[37909,37982]  
gtgtccttaactcagaggtcagagtgcctgcttgaagtcggaagtcgc  
tgggtcaaactccagcaggatacgc  
1-6tRNA-Ser(tga)c[38604,38695]  
ggaaggttggtagagcttggtaatacgtagcttgaaactagtttggc  
cttgaatacagggtagaagggttcaaactcccttaccttct  
1-7tRNA-Phe(gaa)c[38708,38779]  
gtagtctagctgagatggattagcgttgccttgaagcaagagaggca  
ggttcgatacctgcggactcca  
1-8tRNA-Lys(ttt)c[38785,38856]  
ggagttatggtgaaatggctatcactgcgggtttttaccccgattattca  
ggttcgaatcctagtggtcca  
1-9tRNA-Trp(cca)c[38981,39054]  
taggggtatagtttatctggtaaaatattggtttccaactccaatgaggt  
gggttcaagtcctactatccctgt  
1-10tRNA-Gln(ttg)c[39056,39128]  
tggctgtagccaagcggtaaggcaacggattttgattccgtgatacgtt  
ggttcgaatccaactagaccagc  
1-11tRNA-Thr(tgt)c[39147,39218]  
gcttgtagtcaattggtagaacagtggttttgaagcctcagacgtg  
ggttcaagtcctactacaagca  
1-12tRNA-Tyr(gta)c[39301,39382]  
gtgccattcgcatagaggcaattgcaggggactgtaactcccctcccttc

ggggttccaaggttcgagtccttgatggcgca  
1-13tRNA-Leu(tag)c[39743,39827]  
tgccgagatggtggaactggtatacacggtagacttagaatctgctgtcc  
taaggatatgtgggttcgaatcccactctcggtat  
1-14tRNA-Asp(gtc)c[40293,40365]  
gtgcgtatgatataatggctattatactcggctgtctatcgagaaatagg  
ggttcgattccccttacgtgcgc  
1-15tRNA-Ile(gat)c[40469,40541]  
gccagcatagcttagtaggcaaagcaaccgaccgataatcggtagtcctt  
ggttcaattccaagtgttggtac  
1-16tRNA-Ser(gct)c[40718,40804]  
ggagagttgtcagagaggcttaatgatacgggttgctaactcgtgtact  
agtaatagtaccaagggttcgaatcccttactctcct  
1-17tRNA-Cys(gca)c[40883,40953]  
gcgggtataaccaactggaaaggtagtagactgcaaatctacgtatatgg  
gttcaattcccattaccgct

>KC748968.1 Mycobacterium phage Gizmo, complete genome

1-1tRNA-Ser(gct)[31235,31318]  
ggagggtgagcatctggtgatgcaggggtcctgctaaggccctacggatt  
cacaccgtgagtttcgattactctcctccgc  
1-2tRNA-Leu(cag)[31415,31491]  
gccctgctgagcaactggcaaagctgccgattcagagtcggggtcatt  
tccgggttcgactcccgggcagggtac  
1-3tRNA-Leu(gag)[31611,31685]  
gtctctgtaggcaaatcgaaaagccgcatcttgaggggtggtgcgtg  
cgggttcgactcccgcagagacac  
1-4tRNA-Leu(caa)[31686,31759]  
gccgtggttaggcatctggcgagccgagttcaagtttcggtgtttgc  
gggttcgaatcccggccacggtac  
1-5tRNA-SeC(tca)[70109,70205]  
attctggcactggtggcgagcccaccggcgagcttcaagctgtcgt  
ggccggagaaccgaccggaacatcccgttcaacgcgacccagggcc  
1-6tRNA-Pro(tgg)[93378,93452]  
cggggtgtagttcagtttgaagagcgttggttgggaccaagtgtcg  
caggttcgaatcctgtcaccccgac  
1-7tRNA-Trp(cca)[93467,93537]  
gggtctgtgcacagggtgcccagcgtctcaaagccgaaggcgggggtt  
cgattccctcaggcctgcca  
1-8tRNA-Pyl(cta)[94734,94806]  
gcaccatttgctcaatggcagagcggcggttctaaaaccgtgagtgccg  
gttcgactccggcatggtgcacc  
1-9tRNA-Met(cat)[94956,95030]  
agcgggtgtagagcagctaggtagctcgccgggtcataaaccggaggacg  
cgtgttcgaatcacgccaccgccac

1-10tRNA-Cys(gca)[95157,95228]  
gcgcctttggcgggaatggctacgtgctcggctgcaacccgagttatcccg  
gttcgactccgggaggcgctc  
1-11tRNA-Glu(ctc)[95233,95307]  
ggtcggttgagtagatggatatctgccaccctctcaagtgagatca  
cgggttcaagtcccgtacggactgc  
1-12tRNA-His(gtg)[95309,95382]  
gtggccgtagttcagccggtagaacgtgggttgtgatccagtcgtcga  
gggttcgagtcctccggtcacc  
1-13tRNA-Ala(tgc)[95544,95618]  
gggcctgtagctccaattggtagagcagcatcctgcaagatgacggctg  
tcggttcgaatccgacctggtccac  
1-14tRNA-Phe(gaa)[95808,95880]  
gccgtcatagctcagttggtagagcactggcctgaaaaccagtgccga  
ggttcgattcctcgtgtcggcac  
1-15tRNA-Val(cac)[95886,95959]  
gtccgttagctcagctggaagagcgctcggccacacccgagaggccgc  
aggttcgalccctgcaatggacac  
1-16tRNA-Lys(ctt)[96078,96150]  
gccttcgtagctcagtggtagagctgtgcctttaagcgataggtcgtt  
ggttcgaatccagccgggggcac  
1-17tRNA-Glu(ttc)[96155,96231]  
ggtcgggtcggctcgtcgttatggccagtcggattttcactccggacatt  
cgcgggttcaattcccgtcccgatcgc  
1-18tRNA-Gly(tcc)[96311,96383]  
gcgggtgtggccgaatggctcaggcaccagattccactctggctacgca  
ggttcgattcctgtcatccgctc  
1-19tRNA-Thr(cgt)[96443,96517]  
gctgctgtagctcacctggcagagcgtcggcgtcgtatcccgaaggtatc  
cgggttcgagtcggacagcagccccc  
1-20tRNA-Thr(tgt)[96518,96590]  
gcctctgtggtccagcggcacggacatccgcctgtaagcggaggacccc  
cgttcgatccgggtagaggctc  
1-21tRNA-Thr(ggt)[96650,96722]  
gctgggtagctcagtggtagagcgttcctctggtatgggaaaggcccg  
ggttcaatccccgactcagctc  
1-22tRNA-Gly(gcc)[98467,98542]  
gcggttatagctcagcctggccagagcatcagttgccaacgtgaacgtc  
gcgggttcaaattcccgtacccgctc  
1-23tRNA-Asp(gtc)[98556,98628]  
ggccctgtagctcagaggaagagcaccgcctgtcagcgggaggtcgcg  
gtatcgtaatccgtcagggtcgc  
1-24tRNA-Met(cat)[98688,98760]  
gcctcactagctcattggtagagccgctcgtcataacgtgcaggtacct



ggttcgattccagggtgaggtac  
 1-25tRNA-Ile(gat)[98766,98840]  
 gcctgttagcggactggtcgtccgatccaagctgataactggcgtaagc  
 ggtgttcgattcaccgagcaggtac  
 1-26tRNA-Arg(acg)[98933,99005]  
 gcctctatggtccaacggatatgacgccggtctacggaaccggagatgcg  
 tgttcgattcgcgctaggggcac  
 1-27tRNA-Val(gac)[99048,99120]  
 gtccgtgtagctcagggtagagcgctgctcgacacgcaggaggaccga  
 ggttcgaaacctcgcatggacac  
 1-28tRNA-Arg(cct)[99294,99367]  
 gcctctgtagctcaacggacagagcaacgcggctctaacgcggtggctgg  
 aggttcgaatcctctcggaggcac  
 1-30tRNA-Gln(ttg)[99908,99983]  
 tggggtatggtggcaatctggcagtcgccggactttgactccggaggt  
 gcagggttcgagtcctgctacccatc  
 1-31tRNA-Arg(tct)[99987,100060]  
 gccctttagctcagtgacagagcggcgagcttctacctcggggccgg  
 gatttcgaatcctccaggggcac  
 1-32tRNA-Lys(ttt)[100128,100204]  
 gggccggtatcttagtctggtcaaagaagtgacttttaatccgcgcgcc  
 gtgggttcgaatcccacccggcccacc  
 1-33tRNA-Gln(ctg)[128217,128291]  
 tgctcgttggtgtaactggcaacactacggactctgactccgtcattta  
 ggttcgaatcctaagcgagcagcca  
 1-34tRNA-Asn(gtt)[128298,128373]  
 tggggtgtccgttaatcaggcaaacgagcggactgtaatccgccctgc  
 aggttcgaatcctgccaccccagcca

>HQ317393.2 Vibrio phage nt-1, complete genome

1-1tRNA-Ser(gct)c[89870,89958]  
 ggagatatggtctaattggtatgacagcaccctgctaaggtgtcggacgtt  
 aatagcgttctctgggttcgactcccagtatctcccca  
 1-2tRNA-Leu(caa)c[90888,90964]  
 gcccaactagtccaattggcagaggcgctagttcaaactagatgatc  
 cgagttcgaatctcgggttgggcacca  
 1-3tRNA-Leu(taa)c[90971,91047]  
 gcgcatgtgtccaattggcagagcatgaggtttaaattctcagggatg  
 cggttcgaatccgcccacgtacca  
 1-4tRNA-Cys(gca)c[91492,91565]  
 gcccgaaatcgataatggaagtatgaggattgcaaatcccgcggtcaga  
 gttcgattctctgttcgggtcca  
 1-5tRNA-His(gtg)c[91966,92040]  
 gtggctgtggcagagtggtaatgccctgattgtattcaggaactcgcg  
 ggttcgattcccgtcggtcaccca

1-6tRNA-Val(tac)c[92720,92793]  
agcccccttagtataatgggagtagcgttctcttacacagaagtagagtcg  
gctcgaatccgacaggggctacca  
1-7tRNA-Gly(tcc)c[92954,93028]  
gcgggtatgatgtaattggtagcatgatgtcctccaagtcgttcgtctc  
ggttcgagtcggtgtacccgctcca  
1-8tRNA-Met(cat)c[93321,93396]  
ggagatgtagctcaagtggtagagcggcgctttcatacggcgtagatcc  
gatttcgagtatcgggtgtctccacca  
1-9tRNA-Arg(tct)c[94086,94161]  
gtcctcatagctcaattggaagacacgtcccttctaaggatgtggttct  
aggttcgaatcctagtggggatgccca  
1-10tRNA-Ala(tgc)c[94236,94311]  
ggggatgtagctcaattgggagagcacctgccttgcaagtaggagggtgc  
gagttcgagtcctcgtcattccacca  
1-11tRNA-Thr(tgt)c[95030,95105]  
gccctgatagcacaaactggcagtcagctcacttgtaatgagcaggttcg  
cggttcaaatccgtgcagggcacca  
1-12tRNA-Gln(ttg)c[95232,95305]  
tgggataggtgtaattggtagcactacggattttgattccgtcagttaga  
gttcgaatctctatatacccagcca  
1-13tRNA-Asp(gtc)c[95602,95677]  
ggagccgaggtgtaactgggtgcatattcccctgtcacgggaaaggaagc  
gggttcgagccccgtcggttccgcca  
1-14tRNA-Asn(gtt)c[95897,95972]  
gcttcattaactcagtcggtagagtacggactgttaatccgtgagtcgt  
tggttcgagcccaacatgaagcgcca  
1-15tRNA-Asn(gtt)c[95978,96052]  
gacggagtagctcagaggcagagcagcgggctgtaacccgcaggtcgag  
atttcgaaattctccttcgtcgcca  
1-16tRNA-Trp(cca)c[96129,96202]  
agggacatgatgtaacggcagcatgacggattccaaacccgttcgtaga  
gttcgaatctctatgtccctgccca  
1-17tRNA-Ile(gat)c[96209,96282]  
agctccatagtttaacggtaaaacacgcgaccgataatcgacgttgaca  
gttcgagtcgtctggggctacca  
1-18tRNA-Ser(tga)c[96345,96430]  
gaaagattcgggtagcggcaacggcttgaaaaccgtcggggcatggga  
atgcctgttagggtcgaatccctagttctccgcca  
1-19tRNA-Met(cat)c[96455,96526]  
tgcggagtagagcagtggtcagctcaccagtctcataagctggaggtcgt  
tggttcgaatccaacctcacgc  
1-20tRNA-Tyr(gta)c[96629,96715]  
ggttcgtagactaatgtaagtacggggattgtaaatccctcgccctta

atcgggcttctaggttcgagtcctagcggaccacca  
 1-21tRNA-Glu(ttc)[96722,96796]  
 tcaccgtagactaatggtaggtcactcccttcaaggaagtatgcgcg  
 agttcgaatctcgtcgggtgaacca  
 1-22tRNA-Lys(ttt)[96861,96934]  
 gggctctatgatgaatggtagcatatgggacttttaatccttcagtcaga  
 gttcgaatctctgtgaccacca  
 1-23tRNA-Phe(gaa)[97023,97098]  
 gcacccttagctcagttggtagagcggcggattgaagcccgcaggtcac  
 ggtctcgatagccgtagggtgcacca  
 1-24tRNA-Leu(tag)[97151,97228]  
 gcgcatgtagcccaatctggcagaggcactggtcttagaaaccagaagt  
 aagagttcgaatctcttcacgtacca  
 1-25tRNA-Arg(acg)[97435,97510]  
 gcccattagctcaattggaagagcagcgcctacgaaggcgaaggttac  
 aagttcgaatctgtattgggtgcca  
 1-26tRNA-Pro(tgg)[97518,97594]  
 ccgtgactagctcaatctggtagagtactccgttggggcggagaagtta  
 agcgttcgaatcgcttgcacgacca  
 1-27tRNA-Pro(tgg)[97604,97679]  
 cgggtgtggtgttaatgggagcatggtcgcttgggagcagcggaaa  
 gattcgaatctcttcacaccacca  
 1-28tRNA-Met(cat)[100873,100950]  
 ggtcctatagctcaactcggtagagcaaccgactcataatcggtaggt  
 acaggttcgagtccttggggtcacca  
 >JF974314.1 Rhizobium phage RR1-A genomic sequence  
 1-1tRNA-Met(cat)[35772,35847]  
 gtcggagtaggaagaggtcatcccgcgtggctcataaccacgagatcgc  
 gattcgaatctcgctccgaacca  
 >JX846612.1 Staphylococcus phage vB\_SauM\_Remus, complete genome  
 1-1tRNA-Ser(gct)[129904,129991]  
 ggagtattactcaagtggcttaagaggttgggttgtaactcaataggtg  
 atttattcactcataggttcaatctatatgctccg  
 >KF669649.1 Bacillus phage CampHawk, complete genome  
 1-1tRNA-Asn(gtt)[29027,29101]  
 tcctctatagctcaatggtagagcacatgactgttaatcatggggtgta  
 ggttcgaatcctactggaggagcca  
 1-2tRNA-Ser(gct)[29189,29278]  
 tggaatgttaccgaagcggtaaggggtctggttgtaaccagatagcgg  
 gcttgatgccggcataggttcgaatcctataattccgt  
 1-3tRNA-Arg(cct)[33500,33574]  
 tgcccatgtagctcagtggtatagagcacgtccctcctaaggacggtgtcg  
 ggagttcaatctctccatggcgt  
 >KF669654.1 Salmonella phage Maynard, complete genome

1-tRNA-Ser(gct)c[19769,19857]

ggaaggttccccgagaggtttaaggactcgactgctaatacgagtggggc  
tttagcccccgaaggttcgaatccttcacctccgcca

1-tRNA-Ile(gat)c[19862,19945]

gcgggagccataggggtggccagtagccgactgatcatcggcgacgac  
actggacaggttcgaatcctgttctcccgtcca

1-tRNA-Asn(gtt)c[20307,20381]

ggtgcttagctaaatggtgaagcggcggactgtaatccgtgatagcaa  
ggttcgagtccttgaggcaccgcca

1-tRNA-Trp(cca)c[20390,20465]

gtgcccttgatctagcggctatgaggtcggctcctccaaaccgtacaaccc  
aggttcgagtcctggaggcatgcca

1-tRNA-Met(cat)c[20534,20610]

ggtcctgtagctcagtcggttagagcagtgaaactcataatcattggtcg  
ttggtcaaaccacaccaggatcacca

>AB853331.1 Staphylococcus phage S25-4 DNA, complete genome

1-tRNA-Trp(cca)c[40531,40602]

acacccttagtataatagtagtacaagggtctccaaacccttagtctt  
tgtgcaaatcaaagagggtgtg

1-tRNA-Phe(gaa)c[40609,40681]

ggtttcttagctcagatggtagagcactagattgaagctctaggtgtcat  
tggttcaaatccaatagaaacca

1-tRNA-Asp(gtc)c[40687,40762]

tggctcattggtgtaactggttaacacactgccctgtcacggcagagagt  
acgagttcgagtcgtatgagtcgt

>KF147891.1 Pseudomonas phage PaBG, complete genome

1-tRNA-Thr(tgt)[120228,120303]

gccggtatagctcagctggttagagcaactgacttgaatcagtaggtctc  
gggttcgatccctgatgccgcacca

1-tRNA-Ala(tgc)[122295,122388]

gaccagtagctcagttggttagagcgcgtgaacgcctgcgccgatagcgg  
gagtaacgtcatagaggtcgagagttcaaattctctctgggtct

1-tRNA-Lys(ttt)[122606,122681]

gggtcgttagctcagttggttagagcatggcgctttaacgccgtggtcgt  
tggttcgagtcgaacacgaccaccca

1-tRNA-Asp(gtc)[122690,122765]

ggccccatagtcgagcgttaagacgcttgcctgtcacgcaagaaatcgc  
gggttcgattcccgtgggtcgcca

1-tRNA-Lys(ttt)[122767,122843]

aggacgttagctcagttggttagagcatctgacttttaacagagggtcc  
tgggttcgagtcacacagtcctacca

>AB797215.1 Klebsiella phage 0507-KN2-1 DNA, complete genome

1-tRNA-Gln(ttg)c[83731,83804]

aggagcatagccaagcggtaaggcaatgggctttgatcccatgatctcag

gttcgaatcctggtgctcctcca  
 1-2tRNA-Asn(gtt)c[84392,84467]  
 gatggtgtagttcagtcggtagaacggaggactgtaatccatatgtcgc  
 aggttcaagtcctgccaccatcgcca  
 1-3tRNA-Trp(cca)c[84477,84552]  
 atctccttggtctagcggctatgatgccggtctccaaaaccgtgcgaccc  
 aggttcgagtcctggagggatgcca  
 1-4tRNA-Met(cat)c[85017,85092]  
 ggtcctgtagctcagtggttagagcagtcgactcataatcgattggtcat  
 tggttcaaaaccaatcaggatcacca  
 1-5tRNA-Thr(ggt)c[140280,140370]  
 cacttcaatggattgggaaatttcgccttgggtggagcgataatcttcgc  
 cgcgcaggacgaattattgtcagaacggcgtggaaatgg  
 >KF669653.1 Salmonella phage Marshall, complete genome  
 1-1tRNA-Ser(gct)c[21402,21490]  
 ggaagggtgcccagaggtttaagggactcgactgtaatcgagtggggc  
 ttttagccccgaagggtcgaatcctcaccttcgcca  
 1-2tRNA-Ile(gat)c[21495,21578]  
 gcgggagccataggggtggccagtagccgactgatcatcggcgacgac  
 actggacaggttcgaatcctgttctcccgtcca  
 1-3tRNA-Asn(gtt)c[21940,22014]  
 ggtgcttagctaaatggtgaagcggcggactgtaatccgtatagcaa  
 ggttcgagtccttgaggcaccgcca  
 1-4tRNA-Trp(cca)c[22023,22098]  
 gtgcccttgatctagcggctatgaggtcgggtctccaaaaccgtacaaccc  
 aggttcgagtcctggaggcatgcca  
 1-5tRNA-Met(cat)c[22167,22243]  
 ggtcctgtagctcagtcggttagagcagtgaaactcataattcattggtcg  
 ttggttcaaaccaaccaggatcacca  
 >KF669652.1 Bacillus phage Grass, complete genome  
 1-1tRNA-Ser(gct)[31229,31317]  
 tggataggtatccaagcggtaaagggtctggttgtaaccagatagtag  
 gctgaggtctagcggaggttcgaatcctctcctatccgt  
 1-2tRNA-Asn(gtt)[31569,31642]  
 ttgtcccatagctcaatggttagagcggccgactgttaatcggaaggttgc  
 tggttcgagcccagctgggacagt  
 1-3tRNA-Gln(ttg)[32860,32932]  
 ttgccgagtagccaagtggtaaggcagcgggcttgaactcgctatcgtt  
 ggttcgatcccagcctcggcagt  
 1-4tRNA-Asp(gtc)[33035,33108]  
 tggctccatagtcagcggttaacacgcccgcctgtcacgtgggtagcat  
 gggttcgaatcccgttggagccgt  
 1-5tRNA-Tyr(gta)[33274,33357]  
 gggtagcggtaacgttggagagttacggcagactgtaaactcgtccct

tcggggttagagtgttcgaatcactccttaccca  
 >AB853330.1 Staphylococcus phage S25-3 DNA, complete genome  
 1-1tRNA-Met(cat)c[13017,13088]  
 ggactcttagcttaaaggtaaagccaaccgctcataacggttgactgta  
 ggttcgagtcctgcagagtcca  
 1-2tRNA-Trp(cca)c[35664,35735]  
 acacccttagtataattagtagtacaagggtctccaaaacccttagtctt  
 tgtgcaaatcaaagagggtgtg  
 1-3tRNA-Phe(gaa)c[35742,35814]  
 ggttcttagctcagatggtagagcactagattgaagctctaggtgtcat  
 tggttcaaatccaatagaaacca  
 1-4tRNA-Asp(gtc)c[35820,35895]  
 tggctcattggtgtaactggttaacacactgccctgtcacggcagagagt  
 acgagttcgagtcctcgtatgagtcgt  
 >KC862299.1 Pseudomonas phage PAK\_P3, complete genome  
 1-1tRNA-Asn(gtt)[86082,86158]  
 tccgttcggctccctcaaggtgaggagctgactgttaatcaagacgtgc  
 ctggttcgattccaggagcggagcca  
 1-2tRNA-Tyr(gta)[86216,86303]  
 ggaggggtggcagagcggtttaatgcaccggactgtaaatccggcgtccg  
 accgggcatcgtggttcaaatccagccccctccacca  
 1-3tRNA-Gln(ttg)[86505,86581]  
 aggcgtgtggcgaaggttaacgcactggactttgactccagcatttg  
 tgggttcgaatcccaccacgtctgccca  
 >KC862298.1 Pseudomonas phage PAK\_P2, complete genome  
 1-1tRNA-Gln(ttg)[89404,89477]  
 tgccgcttcgttcaattggtaggacgccagacttgaatctggagatgatg  
 gttcgatcccatcagcggctgccca  
 1-2tRNA-Lys(ttt)[90226,90302]  
 tggacggaagctaaagtggatcagcatctggcttttaaccagacttatag  
 tgattcgagtctacccgttcaacca  
 1-3tRNA-Leu(tag)[90566,90650]  
 ggccctgtggtggaattggtatacacatcagctctagaaactgacgccga  
 gaggattgaggggtcaagtcctccggggccacca  
 1-4tRNA-Ile(gat)[90861,90936]  
 agccgggtagctcaattggtagagcaccgaccgataatcgggtggtga  
 aggttcaagtcttctctggtacca  
 1-5tRNA-Asp(gtc)[90946,91024]  
 ggccattagctcagctctggactagacgaagcccctgtctagggaaggt  
 cgtcgggtcgaatccgacatgggtcgcca  
 1-6tRNA-Met(cat)[91125,91199]  
 agcggttaagactggctggcgctgtcactcggctcataaccgaatacaagt  
 ggttcgattccacctctcgctcca  
 1-7tRNA-Cys(gca)[91435,91510]

cccgcgtggccgagaggtttaggcggcggattgcaaatccgtctcacat  
cggttcaaatccgatacgcggctcca  
1-8tRNA-Asn(gtt)[91521,91596]  
tgggatgtagctcagttggttagagcaggagctgttaactctcaggtcgc  
aggttcgaaccctgccgtcccagcca  
1-9tRNA-Pro(tgg)[91659,91736]  
ctcctcgtagctcagtcgttagagtcggatttgaatccgaaggtc  
gaaggttcaaatcctccgggtgacca  
1-10tRNA-Gly(tcc)[91744,91820]  
gcgggtttcgtatagctcgttattattcttggtccaccaagagact  
agggttcgaatccctaagcccgcacca  
1-11tRNA-Phe(gaa)[91883,91958]  
gcgcttgaagctaactaggtagaagcaccgggttgaaattcggaggact  
tggatcgttaccaagcgggcgcacca  
1-12tRNA-Glu(ttc)[91965,92040]  
gcagttatagattaaatggataaatcgccagactttcaatctggtgttcc  
gggttcgatccccggttaactgtcca  
1-13tRNA-His(gtg)[92101,92175]  
gtggagattgtgtagcccgatgctgccttcggtgtgacccgattgtt  
ggggttcgagtcctccctccaacc  
1-14tRNA-Thr(tgt)[92362,92436]  
gcccttaagcatttatggtgatgcaccgcttgaacccggcgaattc  
tgtcaagtcaggaatggggcacca

>KC690136.1 Escherichia phage 2 JES-2013, complete genome

1-1tRNA-Pro(tgg)c[61326,61402]  
ctccgcgtagctcagcttggtagagcgcctgattgggatcaggaggctcg  
agtgttcgaatcactccgtggagacca  
1-2tRNA-Met(cat)c[61414,61488]  
ggcctgtagctggaaggttcaagcaagcgactcataatcgccagacggt  
ggttcaattccaccagggccacca  
1-3tRNA-Thr(tgt)c[61490,61565]  
gctgatgtagcacaattggtagtgaattgattgtaataataggttgc  
aggttcaagtcctgccatcagcacca  
1-4tRNA-Arg(tct)c[61788,61862]  
gccctgtagcttagtgataaagcagcgcccttctaagccgttgacact  
ggttcgagtcagtagcgggtgcca

>KC862300.1 Pseudomonas phage PAK\_P4, complete genome

1-1tRNA-Gln(ttg)[90172,90245]  
tgccgcttcgttcaatggttaggacgccagacttgaatctggagatgatg  
gttcgacccctcagcggctgcca  
1-2tRNA-Arg(tct)[90451,90525]  
gctcgtatagttaacggatgcacaacggtcttctaagccgtaaggtcta  
ggttcgaatcctagtagcgcga  
1-3tRNA-Leu(tag)[91273,91357]

ggccctgtggtggaattggtatacacatcagtccttagaaactgacgccga  
 gaggattgagggttcaagtcctccggggccacca  
 1-4tRNA-Ile(gat)[91568,91643]  
 ggccagatagctcaattggtagagcaccgaccgataatcgggtggttga  
 aggttcaagtccttctctggccacca  
 1-5tRNA-Asp(gtc)[91653,91731]  
 ggcccattagctcagtcctggactagagcaagcccctgtctagggaaggt  
 cgcgggttcgaatccggcatgggtcgcca  
 1-6tRNA-Met(cat)[91832,91906]  
 agcggttaagactggctggagctgtcactcggctcataaccgagcacaagt  
 ggttcgattccacctctcgctacca  
 1-7tRNA-Cys(gca)[92143,92218]  
 ccccggttggccgagaggttaggcggcggttgcaaatccgtctcacat  
 cggttcaaatccgatacgcggctcca  
 1-8tRNA-Asn(gtt)[92229,92304]  
 tgggatgtagctcagttggtagagcaggagctgttaactctcaggtcgc  
 aggttcgagccctgccgtcccagcca  
 1-9tRNA-Pro(tgg)[92368,92445]  
 ctctcgtagctcagtcctggttagagtgtctgatttgaatcagaaggtc  
 gaaggttcaaatcctccgggtgacca  
 1-10tRNA-Gly(tcc)[92452,92527]  
 gcgggtatagctcagttggtagagcgtctgcctccaagcagttcgtcgt  
 cggttcaagtcgtctatccgctcca  
 1-11tRNA-Phe(gaa)[92534,92610]  
 gggactgtagctcataagggttagagcgggtgattgaaatccacaggtcg  
 ggcgttcgattcggcccggtccacca  
 1-12tRNA-Glu(ttc)[92617,92692]  
 gcagttatagattaaacgggttaaactcgccagactttcaatctggtgttcc  
 gggttcgatccccggttaactgtcca  
 1-13tRNA-His(gtg)[92753,92827]  
 gtggagattgttagcccggatgctgccttccggtgtgacccgattgtt  
 ggggttcgagtcctccgctccaacc  
 1-14tRNA-Thr(tgt)[93014,93088]  
 gccctttaagcatttatggtgatgcaccggcttgaacccggcgaattc  
 tgtcaagtcaggaatggggcacca

>HQ163896.1 Staphylococcus phage Sb-1, complete genome

1-1tRNA-Met(cat)c[7193,7264]  
 ggactcttagcttaaaggtaaagccaaccgctcataacggttgactgta  
 ggttcgaatcctgcagagtcca  
 1-2tRNA-Trp(cca)c[30349,30420]  
 acacccttagtataattagtagtacaagggtctccaaaacccttagtctt  
 tgtgcaaatcaaagagggtgtg  
 1-3tRNA-Phe(gaa)c[30427,30499]  
 ggtttcttagctcagatggttagagcactagattgaagctctaggtgtcat



tggttcaatccaatagaaacca  
 1-4tRNA-Asp(gtc)c[30505,30580]  
 tggctcattggtgtaactggttaacacactgccctgtcacggcagagagt  
 acgagttcagctcgtatgggtcgt  
 >KC131129.1 Vibrio phage VH7D, complete genome  
 1-1tRNA-Ser(gct)c[110760,110848]  
 ggaagcatggtctaaaggtatgacagcaccctgctaagggtcggacgtt  
 aatagcgttctctgggttcgattcccagtgcttcgccca  
 1-2tRNA-Leu(caa)c[111017,111093]  
 gcccaactagtccaattggcagaggcactagtttcaaacactaggagttc  
 cgagttcgaatctcgggttgggcacca  
 1-3tRNA-Leu(taa)c[111210,111286]  
 gcgcacgtggtccaattggcagaggcatgaggcttaaaatctcagggatg  
 gcgggtcgaatccgcccggtgcgtacca  
 1-4tRNA-Cys(gca)c[111289,111362]  
 gtcgaatcgtataatggaagtatgacggattgcaaatccgcaggtcagg  
 gttcgattccctgttcgagctcca  
 1-5tRNA-His(gtg)c[111375,111451]  
 gtggcagtggtgaagtggaaataccccgggttgattccggaagatg  
 cgggttcgatccccgtctgtcacccca  
 1-6tRNA-Val(tac)c[111853,111926]  
 ggtcccttagtataatggaagtacgtctctttacacagagaagaagtg  
 gtcgattccactagggactacca  
 1-7tRNA-Gly(tcc)c[111933,112006]  
 gcgggtatgatgtaatggtagcatgacgtcctccaagtcgttcgtctcg  
 gttcgagtcggtgtaccgctcca  
 1-8tRNA-Met(cat)c[112196,112271]  
 ggtgatgtagctcaagtggcagagcaacgcttcatacggcgaagatcc  
 gatttcgagtatcgggtgtcacctcca  
 1-9tRNA-Arg(tct)c[112797,112872]  
 gcgctgtagctcaattggaagagcacgtcccttctaaggatggggttat  
 gatttcgaatctatacggcgtgccca  
 1-10tRNA-Thr(tgt)c[113263,113338]  
 gccctgatagcacaactggcagtgacgtcacttgtaatgagcaggttcg  
 cgggtcgaatccgtgtcagggcacca  
 1-11tRNA-Gln(ttg)c[113466,113539]  
 tggggattggtgtaaaggcagcataacgtactttgaatgcgttggtatca  
 gttcgaatctgtatccccagcca  
 1-12tRNA-Asp(gtc)c[113559,113634]  
 ggagccgaggtgtaagtgggtgcatgtctccctgtcacggagaaggtagc  
 ggggtcgaaccggtcgggtccgccca  
 1-13tRNA-Asn(gtt)c[113705,113780]  
 ggatcgctaactcaatggtagagtgtcgcctgttaagcgaggagttcc  
 gatttcgagttcgggggtccgccca

1-14tRNA-Trp(cca)c[113856,113929]  
 aggggcatgatgtaaaggcagcatgacggattcaaaccgttcgttaga  
 gttcgaatctctatgcccctgcca  
 1-15tRNA-Ile(gat)c[113936,114009]  
 agtcccttagctcaacggtagagcgtgcgaccgataatcgcttgtaaga  
 gttcgattctcttagggactacca  
 1-16tRNA-Ser(tga)c[114073,114158]  
 gaaagattctggtagcggcaacggtcttgaaaaccgtcggtcaccggga  
 ggtgatgttagggtcgaatccctagctctccgcca  
 1-17tRNA-Met(cat)c[114183,114256]  
 ttgctgggttagagaagtggtcatctcgtcggctcataagccggagaacg  
 ctggttcgaatccagccccacgca  
 1-18tRNA-Tyr(gta)c[114358,114443]  
 ggagcgtacgtctcaaggtgagacaggggactgtaaatccctgaccctta  
 acgggtagagaggttcgattcctctacgtccacca  
 1-19tRNA-Glu(ttc)c[114450,114524]  
 tctcccgtggactaacggtaggtcatcacccttcaaggtgaagtgcgcg  
 agttcgaatctcgtcgggagaacca  
 1-20tRNA-Lys(ttt)c[114588,114664]  
 gcgtcggtagctcatcatggaagagcaggagcttttaactctcaggtgt  
 ctggttcgagtcagagcggcgtagcca  
 1-21tRNA-Lys(ttt)c[114676,114749]  
 ggggtctatgatgtaatggtagcatatgggacttttaactctcagtcaga  
 gttcgaatctctgtggaccacca  
 1-22tRNA-Phe(gaa)c[114838,114912]  
 gcacccttagcttatcaggaaaagcggcggttgaagtcgagtcgtc  
 ggttcgattccgaggggtgcacca  
 1-23tRNA-Leu(tag)c[114914,114990]  
 gcgcaagtagcccaattggcagaggcactggtcttagaaaccagaagtta  
 agagttcgaatctctcttgcgtacca  
 1-24tRNA-Arg(acg)c[115345,115420]  
 gcccgattagctcaattggaagagcagcgccctacgaaggcgaaggttac  
 aagttcgaatctgtattgggtgcca  
 1-25tRNA-Pro(tgg)c[115428,115504]  
 ccgtgactagctcaatctggtagagtactccgttggggcggagaagtta  
 agcgttcgaatcgcttgcacggacca  
 1-26tRNA-Pro(tgg)c[115514,115587]  
 cgggacgtggcgtaaaggtagcgttcgcttgggagcatgtgtaaga  
 gttcgagtctctctgcccgaacca  
 1-27tRNA-Met(cat)c[117432,117509]  
 ggcctatagctcaacacggttagagcaaccgactcataatcggtaggtt  
 acaggttcgagtcctgttgggtcacca  
 >KF806589.1 Erwinia phage Ea35-70, complete genome  
 1-tRNA-Asn(gtt)[165191,165266]

tggctctatagttcagtcggtagaacacgaggactgttaatccgtaggtcgc  
 tggttcgaatccagctagaccagcca  
 >FR775895.2 Enterobacteria phage phi92, complete genome  
 1-1tRNA-Met(cat)[51625,51700]  
 ggttcctagctcactgacgagagcgcacacctcataagtgtcgagggca  
 gggattgtaaccctgggaaccacca  
 1-2tRNA-Leu(taa)[51732,51817]  
 gcaagtgtggtggaattggtgatacacattgtgcttaaacgcaacgctt  
 aaatgcttgaggggtcgaatccctccactgcacca  
 1-3tRNA-Ser(tga)[52019,52108]  
 ggaaggtaggcgcgagcggcgcgaaccagggttgaaccctggccattg  
 tagcgatacggatggttcgactccattatcttctcca  
 1-4tRNA-Ser(gct)[52288,52373]  
 ggtagattggtgaaatggtagccacaacagttgctaactgtcgtcgga  
 aacggcgtgtaggttcaagtcctacatctaccgcca  
 1-5tRNA-Lys(ttt)[52508,52583]  
 acatcgtagcttagttggtagagcaagggtctttaactccaaggtcga  
 aggttcgaatccttcacgatgtacca  
 1-6tRNA-Tyr(gta)[52589,52675]  
 gtaggtatcgcatagcggcaattgctggagactgtaaactcttgcctt  
 cggggcttcgttggttcgagtcgaactacctgcacca  
 1-7tRNA-Asn(gtt)[52683,52767]  
 gatggattggcctagtgggtggcgacggactgttaatccgtgaacgaaa  
 gttctagcaaggttcaaactcttgatccatcgcca  
 1-8tRNA-Thr(tgt)[52847,52921]  
 gctcctatcgataacggctattacggttccttgaagcaacttatcag  
 ggttcgagtccttgtgggagcacca  
 1-9tRNA-Gly(tcc)[53323,53397]  
 gcgggtatagtgtaatggtagcatatgaggtttccaccctccaggtgca  
 ggttcaagtcctgttactcgctcca  
 1-10tRNA-Gln(ttg)[53829,53903]  
 tggagattggcctagtgggaaggcaacggccttgaagtcgtgatgacta  
 ggttcgattcctagatctccagcca  
 1-11tRNA-Pro(tgg)[53911,53986]  
 cagtcgctagcgcagttggtagcgtgggagccttggacgcttcaggtcgc  
 aggttcgagtcctgccgcactgacca  
 1-12tRNA-Phe(gaa)[53992,54066]  
 gcagagatagctgagacggattagtgctaccctgaaaaggtagaaaggat  
 ggatcggtaccatctctctgcacca  
 1-13tRNA-Leu(tag)[54144,54228]  
 ggctaagtgtggaatggtatacacgatacgttagaacgtattgcccc  
 agggattgtgagttcgagtctcaccttagctacca  
 1-14tRNA-Met(cat)[54244,54322]  
 cgcgggatagaggagtctggtcgtcctcgccagtttcatatgctggagat

cgtaggttcaaatcctactcccgtacca  
 1-15tRNA-Ile(gat)[54469,54544]  
 tgtggtatcgtacagatggttagtacctcgaccgataatcgagaaacaa  
 cggttcgactccgtttaccacgacca  
 >KF550303.1 Enterobacteria phage 4MG, complete genome  
 1-1tRNA-Phe(gaa)c[60264,60339]  
 gggattgtaactcagttggtagatgcctgcctgaagagcagatggtcgg  
 tggttcgagtcaccccggtcccacca  
 1-2tRNA-Val(tac)c[60347,60420]  
 gcttccttagtttaatggtagaacctgtctttacacggcagttgcggta  
 gttcgattctaccaggaagtacca  
 1-3tRNA-Leu(tag)c[60428,60504]  
 gggcgattgatggaattggtatacgtgtcggatttagattccgaattttg  
 ggggttcgagtcacctgtcgcccacca  
 1-4tRNA-Ala(tgc)c[60614,60689]  
 ggggctgtagtttattggataaaatcacaggcttgacacctgtagaact  
 gatttcgattctcagtggtcccacca  
 1-5tRNA-Arg(acg)c[60694,60769]  
 gcaggtatagttcaactggacagagcatcagttacgaagctgagaatcg  
 gggttcgaatccctgtactgcacca  
 1-6tRNA-Pro(tgg)c[60776,60853]  
 cggagcgtagcgcagctctggtcagcgtgggtgccttggatgcactgggtc  
 gcaggttcgaatccctgccgtcccacca  
 1-7tRNA-His(gtg)c[61038,61111]  
 ggggaatttagttaaggggcataatggccgcttgtgctcggttgtctcct  
 gttcgagtcaggaagttcccacca  
 1-8tRNA-Asp(gtc)c[61116,61191]  
 ggagatatagtttaaacggataaaatacacccctgtcacgggatgttcc  
 gggttcgatgcccggtatctccacca  
 1-9tRNA-Asn(gtt)c[61197,61285]  
 ggttctttgaccgagaggccgatggtagcaggctgttaacctgcctggag  
 caatccacaacgaaggttcgaatccttcaggaaccgcca  
 1-10tRNA-Ser(tga)c[61548,61636]  
 ggagagcaggctgcatggtgcagactccggttgaacccggtcccatcgt  
 agcgatacggtagacagttcgattctgtgctctcctcca  
 1-11tRNA-Ser(gct)c[61637,61729]  
 ggaagattaaccctaatacaggttaaggatctcttgctaaagagacagta  
 gccccgaaacgggtgtcagttcgagttgacatcttctcc  
 1-12tRNA-Ser(gga)c[61890,61982]  
 ggtggaatggtcgagcggtttaagacagcaccttgaaagggtgcggccc  
 cttcaaacgggtccgtaggttcgaatcctacttccaccgcca  
 1-13tRNA-Gln(ttg)c[62097,62172]  
 aggaggatggtgtaattggttagcacacgggctttgatctccggagtta  
 gggttcgagtccttatcttctcctcca

1-14tRNA-Trp(cca)c[62178,62254]  
 agggacttagcacaattggctagtgcagcggattccaaatccgcaggttc  
 tgggttcgaatcccaggtccctgcca  
 1-16tRNA-Glu(ttc)c[62340,62417]  
 gctgtcatcgtctaattggactaggacatcagactttcaatctgagaaat  
 acgggttcgaatcccgttgacagtacca  
 1-17tRNA-Ile(gat)c[62505,62581]  
 gggagtatagctcagatggatagagcgtcgcgccgataagcgagaggtcg  
 ctggttcaatcccagctactcccacca  
 1-18tRNA-Tyr(gta)c[62588,62675]  
 ggggcggttcccggagcggcaaacgggcgggattgtaaatcccttggcat  
 cgctccttcgtaggttcgagtcctactcgccccacca  
 1-19tRNA-Cys(gca)c[63130,63206]  
 gcgcggttgccggaattggttaacggctctgtctgcaaaataggtatttg  
 tcagttcgagtctgacaccgtgctcca  
 1-20tRNA-Arg(tct)c[63208,63282]  
 cggggcatagtctagaggataggcaggagtcttctaaactcctttacgtg  
 ggttcgaatcctactgcctcgacca  
 1-21tRNA-Leu(taa)c[63289,63366]  
 gcgctcttggccaatctggttagagcatgaggcttaagacttcagggtt  
 cccagttcgagtctgggagggcgacca  
 1-22tRNA-Arg(gcg)c[63670,63743]  
 tcgttgatagccttagcggtaaaggccccctctgcgcaaggggttcagtg  
 gttcgaatccacttcagcgagcca  
 1-23tRNA-Thr(tgt)c[63750,63824]  
 gtccttaaagcataagtggcgatgcagcggccttgaagccgaagaagtg  
 ggttcgattcctactgggagcacca  
 1-24tRNA-Lys(ctt)c[66032,66107]  
 ggggtattaactcagcggttagtagcggcctttaagccgaaggtcga  
 aggttcgaatccttcagccccacca  
 1-25tRNA-Met(cat)c[66802,66878]  
 ggttctgtagcttagttggttagagcgttccctcataaggaagaggtcg  
 caggttcaatccctgccagaactacca

>KC862301.1 Pseudomonas phage PAK\_P5, complete genome

1-1tRNA-Asn(gtt)[86121,86197]  
 tccgttcggtccctcaaggtgaggagcttactgttaatcaagacgtgc  
 ctggttcgattccaggagcggagcca  
 1-2tRNA-Tyr(gta)[86255,86342]  
 ggaggggtggcagagcggtttaatgcaccggactgtaaatccggcgtccg  
 accgggcatcgctggttcaaatccagccccctccacca  
 1-3tRNA-Gln(ttg)[86544,86620]  
 aggcgtgtggcgaaggtttaacgcactggactttgactccagcatttg  
 tgggttcgaatcccaccacgtctgcca

>AB775548.1 Pseudomonas phage PPpW-3 DNA, complete sequence

1-tRNA-Arg(tct)[21063,21139]  
ggccccgtagctcagctggatagagcattcgcccttaagcgaacgggtca  
caggttcgaatcctgtcggggtcgcca

>KC862295.1 Pseudomonas phage CHA\_P1, complete genome

1-tRNA-Asn(gtt)[86241,86317]  
tccgttcgggtccctcaaggtgaggagcttgactgttaatcaagacgtgc  
ctggttcgattccaggagcggagcca  
1-2tRNA-Tyr(gta)[86375,86462]  
ggaggggtggcagagcgggttaatgcaccggactgtaaatccggcgtcgg  
accgggcatcgctggttcaaatccagcccctccacca  
1-3tRNA-Gln(ttg)[86664,86740]  
aggcgtgtggcgaaggttaacgcactggactttgactccagcatttg  
tgggttcgaatcccaccacgtctgcca

>KJ409772.1 Pseudomonas phage phiPsa374, complete genome

1-tRNA-Lys(ttt)[24977,25053]  
tggacgttggccgaccggcgcgaggcaacaggcttttaacctgtattaac  
tgagttcgattctcaggcgttcaacca  
1-2tRNA-Ser(aga)[25261,25350]  
ggcgggtagtgatcatggcgatcaagctgttagaaagcagtaccattgg  
ctagtaccgggtgagagttcgattcccttaccgcctcca  
1-3tRNA-Leu(caa)[25357,25433]  
cggcagttgaagcaactggtaatcttcgtcagctcaaacctgatgtattc  
tgagttcgaatctcagactgccgacca  
1-4tRNA-Val(tac)[25440,25513]  
gcttcttagtttaattggtagaacgccatccttacacgggtggctgcggtg  
gttcgattccatcaagaagcacca  
1-5tRNA-Gln(ttg)[25660,25736]  
tggggattagaatagatggcctaattcatcggtctttgacaccgacagca  
ctggttcgaatccagtatcccctgcca  
1-6tRNA-Trp(cca)[26408,26484]  
agggggtgaagtgaatggctatgcacgcgggattccaaatccttgacagac  
tgggttcgattcctagcacgcctgcca  
1-7tRNA-Arg(tct)[26578,26654]  
ggccttatagtgaagggaattagcacatcatccttctaagttgatagat  
aaggttcgaatccttatagggtacca  
1-tRNA-Glu(ttc)[26874,26950]  
gctcttgcgtctaaaggtataggatggctgactttcaatcagttgatgt  
tgggttcgagtcaccaagagtacca  
1-9tRNA-Asp(gtc)[26955,27030]  
ggcttatgttctctgggaaggaaggcacactgtctatgtgtcagttga  
gggttcgaatcccttataggtcgcca  
1-10tRNA-Thr(tgt)[27091,27165]  
gcccttgcataaaaggctattatgcctgtttgtaatcaggttattgc  
ggttcgaatccgtactggggcacca

1-11tRNA-Ile(gat)[27172,27246]  
 tgccgtagtatagtggtctgtacactcgctgataagcgataggtgaa  
 agttcgattcttctctggcaacca  
 1-12tRNA-Arg(acg)[27253,27330]  
 atagctgtggccgaactggactaggcaccatcctacgaagttggtaaat  
 gcaggttcgaatcctgtcagctatgccca  
 1-13tRNA-Asn(gtt)[27486,27562]  
 tggtaatagtctccacggcgggggtctcggtctgtaaccgaagttgc  
 ttggttcgattccaagattaccagcca  
 1-14tRNA-Asn(gtt)[27569,27655]  
 ttccgtgtgtagggaactggtagaccacctgactgtaatcaggcgt  
 aacgcaacttaggttcgaagcctaccaccggagcca  
 1-15tRNA-Pro(tgg)[27774,27847]  
 ctctcggaagcgttacggtagcgtactttgttggaaacgaagtggtg  
 gttcgactccaccccgagtacca  
 1-16tRNA-Ala(tgc)[27991,28064]  
 gggctgtaagaattatgatatgtcgtacgttgaccgtagaagccggg  
 gttgactccccgacggtccacca  
 1-17tRNA-Leu(tag)[28324,28400]  
 gctcctgtaggccaactggtagagtcagtcgcttagaacgcataaagtc  
 tcggttcgaatccgagtggtgagtagcca  
 1-18tRNA-Cys(gca)[28458,28532]  
 gtgtcttgcgagcggctgaggtagcggattgcaaacccgttaggtt  
 gttcaactccaacaagatactcca  
 1-19tRNA-Gly(tcc)[28539,28614]  
 gcgtgattcgtagaggtctaatactctcggctccaccgaggaacca  
 cgggtcgactccgtgatcccgacca  
 1-20tRNA-Phe(gaa)[28620,28695]  
 gcactctaagctgactcggtagtagcgacggcctgaaaagtcgtaggact  
 tgggtcgactccaagagattgcacca  
 >KJ101592.1 Enterobacter phage PG7, complete genome  
 1-1tRNA-Thr(tgt)c[72104,72179]  
 gccggttagctcagttggtagagcagctcatttgaatgagagggtcag  
 cgggtcgaatccgttaaccggcacca  
 1-2tRNA-Leu(taa)c[72181,72265]  
 gcatcaatggtggaactggtatacacaggagactaaaatctccgccga  
 aaggattgagggtcgaatccctcttgatgcacca  
 1-3tRNA-Cys(gca)c[72272,72356]  
 gctagggtgctgagtggtgcaaaaggcagcggttgcaaatccgccgggta  
 tcccttcgtgagttcgaatctcactcctagctcca  
 1-4tRNA-Arg(tct)c[72361,72438]  
 cgggtatagctcagctggatagagcagtggttctaataccacaggtcg  
 acgggttcgaatccctctacctcgacca  
 1-5tRNA-Met(cat)c[74609,74685]

ggccctatagctcaattggttagagcacgcgactcataatcgctaggtg  
caggttcgagtcctgctgggtcacca  
1-6tRNA-Phe(gaa)c[75607,75681]  
gggaagttagctgagatggattagcgcgtgcctgaagagcatgagaggtt  
ggttcgattccaacactcccacca  
1-7tRNA-Pro(tgg)c[75683,75759]  
ctccgtgtagctcagtttggtagacatccggttgggaccggagggtcc  
gaggttcaaatcctcgcatggagacca  
1-8tRNA-Gly(tcc)c[75766,75840]  
gcatccatcgatatcggtattatgactggctccacccagtagatgag  
agttcgattctctctggatgctcca  
1-9tRNA-Met(cat)c[75846,75940]  
acggaacgttcggatatggtagaggcatggccttcataagataaattgtg  
acgtcaatcgcaatttaacctgggtcgaatccaggcgttcctgac  
1-10tRNA-Trp(cca)c[75991,76064]  
aggtctctcgtatagtggtattatcctgagctccaacctcagtgacgtgg  
gttcgattcctacggggcctgcca  
1-11tRNA-Ser(tga)c[76069,76160]  
ggaagcgtggttagagcggcttattacaccggtcttgaaaaccggaggccg  
tagtgatacgggtccgtgggttcgaatcccaccgcttctcca  
1-12tRNA-His(gtg)c[76165,76240]  
gtggccgtagttcagttggtagaactcgagattgtgattctcgtagccat  
gggttcaactcccatcggtcacccca  
1-13tRNA-Gln(ttg)c[76455,76530]  
tggggtatagccaagttggtaaggcagtagattttgattctacgattccc  
tggttcgagtcagggtacccagcca  
1-14tRNA-Met(cat)c[76537,76613]  
tcggggttaacttcagttggtagaatgacgggttcatacccgttacg  
atggttcgagtcacatcccccctcca  
1-15tRNA-Asp(gtc)c[76771,76846]  
ggacctatagtttcagcggtgaaaatactgcctgtcacgcgagagtcac  
gggttcgaatcccgttaggtccgcca  
1-16tRNA-Asn(gtt)c[77091,77175]  
gggtcgttggctgagagggtgaagctgcgactgttaatccgtgcagaaa  
tgactaggcaggttcgatacctgcacgacccgcca  
1-17tRNA-Glu(ttc)c[77181,77255]  
tctccgttcgtctatcggtaggacgccgctttcacgtcggaaagaag  
agttcaattctcttacggagaacca  
1-18tRNA-Lys(ttt)c[77257,77334]  
aggacgttagctcagttggttagagcatccgacttttaacggaatgtcg  
atgggttcaactccctcagtcctacca  
1-19tRNA-Ile(gat)c[77373,77448]  
gggaatatagctcagttggttagagcaaacgaccgataatcgtaggccac  
tggttcgagtcagttattcccacca



>AB903967.1 Staphylococcus phage phiSA012 DNA, complete genome

1-1tRNA-Met(cat)c[8109,8180]  
ggactcttagcttaaaggtaaagccaaccgctcataacggttgactgta  
ggttcgagtcctgcagagtcca  
1-2tRNA-Phe(gaa)c[30344,30416]  
ggtttcttagctcagatggtagagcactagattgaagctctaggtgtcat  
tggttcaaatccaatagaaacca  
1-3tRNA-Asp(gtc)c[30422,30497]  
tggctcattgggtgaactggtaacacactgccctgtcacggcagagagt  
acgagttcgagtcctgtatgggtcgt

>KF156340.1 Synechococcus phage S-MbCM100, complete genome

1-1tRNA-Val(tac)[13860,13931]  
gggcgaataactcagcggtagagtgccctctttacacggagattgtcggg  
ggttcgatcccctcttcgcca  
1-2tRNA-Leu(taa)[18850,18936]  
tgggagtgtagcggaatcggtagacgcaccagacttaaaatctgttgaga  
attaatctcgtgggggttcaagtccttctcccat  
1-3tRNA-Thr(tgt)[19560,19632]  
gcctccgtagctcagtggtagagcaggcctttgtaaagctcaggtcgca  
agttcaaatctgtcagaggctc  
1-4tRNA-Asn(gtt)[19637,19709]  
tcctctatagctcagttggtagagcagtgactgttaatcacctgtccc  
tgggtcgagtcagggtggaggag  
1-5tRNA-Arg(tct)[154513,154588]  
tgggtcagtagctcagatggatagagcaactgccttctaagcagtcggcc  
acaggttcgagtcctgtctgacctgt

>JN624850.1 Mycobacterium phage Pleione, complete genome

1-1tRNA-Ser(gct)[31551,31634]  
ggagggtgagcatctggtgatgcaggggtcctgctaaggccctacggatt  
cacaccgtgagtttcgattactcctccctccgc  
1-2tRNA-Leu(cag)[31731,31807]  
gccctgctgagcaactggcaaaagctgccgcattcagagtgcgggtcatt  
tcggggttcgactccgggcagggtac  
1-3tRNA-Leu(gag)[31927,32001]  
gtctcttaggcaaatcggaagccgcatcttgaggggtggtgcgtg  
cgggttcgactcccgcagagacac  
1-4tRNA-Leu(caa)[32002,32075]  
gccgtggtaggccatctggcgagccgcgagttcaagtttcggtgtttgc  
gggttcgaatcccggccacggtac  
1-5tRNA-SeC(tca)[68643,68739]  
attctggcactggtggcgagcccaccggcgagcttcaagctgtcgt  
ggccggagaaccgaccggaacatcccgttcaacgcgacccagggcc  
1-6tRNA-Pro(tgg)[91912,91986]  
cggggtgtagttcagtttgaagagcgttggttgggaccaagtgtcg

caggttcgaatcctgtcaccgac  
1-7tRNA-Trp(cca)[92001,92071]  
gggtctgtgcacaggtgcccaggtctccaaagccgaagcgggggtt  
cgattccctccaggcctgcca  
1-8tRNA-Pyl(cta)[93268,93340]  
gcaccatttgctcaatggcagagcggcggcttctaaaaccgtgagtgccg  
gttcgactccggcatggtgcacc  
1-9tRNA-Met(cat)[93490,93564]  
agcgggttagagcagctaggtagctcgccgggctcataaaccggaggacg  
cgtgttcgaatcacgccaccgccac  
1-10tRNA-Cys(gca)[93691,93762]  
gcgccttggcggaatggctacgtgctcggtgcaacccgagttatccc  
gttcgactccgggaggcgctc  
1-11tRNA-Glu(ctc)[93767,93841]  
ggtccgttgagtagatggatatctgccaccctctcaagtgagatca  
cgggttcaagtcccgtacggactgc  
1-12tRNA-His(gtg)[93843,93916]  
gtggccgtagttcagccggtagaacgctgggttgtgatccagtcgtcga  
gggttcgagtcctccggtcaccc  
1-13tRNA-Ala(tgc)[94078,94152]  
gggcctgtagctccaattggtagagcagcatccttgaagatgacggctg  
tcggttcgaatccgacctggtccac  
1-14tRNA-Phe(gaa)[94342,94414]  
gccgtcatagctcagttggtagagcactggcctgaaaaccagtgccga  
ggttcgattcctcgtgtcggcac  
1-15tRNA-Val(cac)[94420,94493]  
gtccgttagctcagctggaagagcgtcggccacacccgagaggccgc  
aggttcgatccctgcaatggacac  
1-16tRNA-Lys(ctt)[94612,94684]  
gccttcgtagctcagtggtagagctgtcgcccttaagcgaataggtcgtt  
ggttcgaatccagccggggcac  
1-17tRNA-Glu(ttc)[94689,94765]  
ggtcgggtcggctcgtcggatggccagtcggattttcactccggacatt  
cgcgggttcaattcccgtcccgatcgc  
1-18tRNA-Gly(tcc)[94845,94917]  
gcgggtgtggccgaatggctcaggcaccagattccactctggctacgca  
ggttcgattcctgtcatccgctc  
1-19tRNA-Thr(cgt)[94977,95051]  
gctgctgtagctcacctggcagagcgtcggcgtcgtatcccgaagcatc  
cgggtcagatccggacagcagcccc  
1-20tRNA-Thr(tgt)[95052,95124]  
gcctctgtggtccagcggcacggacatccgccttgaagcggaggacccc  
cgttcgatccgggtagaggctc  
1-21tRNA-Thr(ggt)[95532,95604]

gctgggtagctcagtggttagagcgttcctctggtagggaaaggcccg  
 ggttcaatccccgattcagctc  
 1-22tRNA-Gly(gcc)[96927,97000]  
 gcgaaggttagctcagctggcagagcgcaccttgccaaggtggaggtcgc  
 gggatcgtaacccgttcttcgctc  
 1-23tRNA-Asp(gtc)[97004,97076]  
 ggcctgtagctcagaggaagagcaccgcctgtcgcgggaggtcgcg  
 gtatcgtaatccgtcagggtcgc  
 1-24tRNA-Met(cat)[97136,97208]  
 gcctcactagctcattggttagagccgtcgtcataacgtgcaggtacct  
 ggttcgattccagggtgaggtac  
 1-25tRNA-Ile(gat)[97214,97288]  
 gcctgttagcggactggctcgtccgatccaagctgataactggcgtaaagc  
 ggtgttcgattcaccgagcaggtac  
 1-26tRNA-Arg(acg)[97381,97453]  
 gcctctatgggtccaacggagatgacgcgggtctacggaaccggagatgcg  
 tgttcgattcgcgctaggggcac  
 1-27tRNA-Val(gac)[97496,97568]  
 gtccgttagctcaggggtagagcgcctgctcgacacgcaggaggaccga  
 ggttcgaaacctcgcatggacac  
 1-28tRNA-Arg(cct)[97743,97816]  
 gcctctgtagctcaacggacagagcaacgcggcttaacgcggtggctgg  
 aggttcgaatcctctcggaggcac  
 1-30tRNA-Gln(ttg)[98357,98432]  
 tggggtatggtggcaatctggcagctcccgcggactttgactccggaggt  
 gcaggttcgagtcctgctaccccatc  
 1-31tRNA-Arg(tct)[98436,98509]  
 gccctttagctcagtggtgacagagcggcgagcttctacctcgcgggccgg  
 gagttcgaatcctcaggggcac  
 1-32tRNA-Lys(ttt)[98577,98653]  
 gggccggtatcttagtctggtcaaagaagtggacttttaacgcgcgcc  
 gtgggttcgaatcccacccggcccacc  
 1-33tRNA-Gln(ctg)[126654,126728]  
 tgctcgttggtgtaactggcaacactacggactctgactccgtcatttta  
 ggttcgaatcctaagcgagcagcca  
 1-34tRNA-Asn(gtt)[126735,126810]  
 tggggtgtccgttaatcaggcaaacgagcggactgttaatccgccctgc  
 aggttcgaatcctgccacccagcca

>JN638751.1 Bacillus phage G, complete genome

1-1tRNA-Cys(gca)[58584,58654]  
 gcgtttatagccaagtggtaaggcctcggctgcaaaaccgatatcgca  
 gttcaaatctcgctaaacgct  
 1-2tRNA-Asp(gtc)[58662,58737]  
 ggctccgtggttagcggttaacacgcctgcctgtcacgtaggagatcgc

cggttcgaatccggtcggggccgcca  
 1-3tRNA-Phe(gaa)[59296,59371]  
 ggaggagtagctcagttggtagagcggcagattgaagatctgcgcgtcgg  
 gggttcaagtcccttttctccacca  
 1-4tRNA-Tyr(gta)[59377,59461]  
 ggggagatagaccgtaagtgggaagcgggcaggactgtaaatcctgtgaga  
 aatccttgggtgttcgattcgccctctccccacca  
 1-5tRNA-Glu(ttc)[59475,59550]  
 ggcgcgttagccaagtggtaaggcatccggctttctaccggagattacac  
 gattcgaacctcgtacgcgtacca  
 1-6tRNA-Thr(tgt)[59556,59630]  
 gccggttagctcagcggtagagcgtccccttgaaggagatgtcgtg  
 ggttcaaatcctataaccggctcca  
 1-7tRNA-Ser(tga)[60123,60212]  
 ggagggttactctaattggtaagagaacagtcttgaaaactgtcgtaggt  
 ataaaagccgatgggggttcgagtcctcaccctccgcca  
 1-8tRNA-Arg(tct)[403940,404015]  
 tgcgcctgtagctcagctggatagagcacgagccttctaagcccgggtc  
 gtaggttcgaatcctaccaggcgcgt  
 1-9tRNA-Ser(gct)[410128,410215]  
 ggggtcgtgggtgagaggctgaaaccacctcctgctaaggaggcagtc  
 gcaagggtcgcagggttcgaatccctccgactccgcca  
 1-10tRNA-Asn(gtt)[410921,410996]  
 tcaccagtagctcagcggtagtagcacctgactgttaatcagggggtcgt  
 aggttcgaatcctacctggtgagcca  
 1-11tRNA-Gln(ttg)[411003,411077]  
 tgccggatagccaagtggtaaggcaatggactttgactccatgatacaga  
 ggttcgaatcctttccggcagcca  
 1-12tRNA-His(gtg)[411235,411309]  
 gtggtttagctcaattggtagagcgtagattgtggatctagaggttg  
 tgggtcgtatcccatcatccacc  
 1-13tRNA-Glu(ttc)[411320,411394]  
 ggggtgttggcgaagtataacgcacatccgactttctatcggacattcgcg  
 ggtttgaatccgtacaccctcca  
 1-14tRNA-Met(cat)[411855,411926]  
 gctggcgggaggtagcgtctcggggagttcatgaactctcattaattc  
 ggttcgaatccggagcccagca  
 1-17tRNA-Gly(tcc)[412560,412632]  
 gcgggtgtgtataacggctattttctgcctccaagcagacgatacg  
 ggttcgattcccgttactcgtc  
 1-18tRNA-Met(cat)[414001,414080]  
 ggaccgttcgcccgagatggtcgaaggcaccagctcataactgggaaaa  
 tcaccgggggttcgactccctcacgtcca

>JN412588.1 Mycobacterium phage Dandelion, complete genome

1-1tRNA-Ser(gct)[34223,34306]  
ggagggtgagcatctggtgatgcaggggtcctgctaaggccctacggatt  
cacacccgtgagtttcgattactcctccctccgc  
1-2tRNA-Leu(cag)[34403,34479]  
gccctgctgagcaaactggcaaagctgccgcattcagagtgagggtcatt  
tccgggttcgactcccgggcagggtac  
1-3tRNA-Leu(gag)[34599,34673]  
gtctctgtaggcaaatcgaaaagccgcatcttgaggggtggtgcgtg  
cgggttcgactcccgcagagacac  
1-4tRNA-Leu(caa)[34674,34747]  
gccgtggtaggcatctggcgagccgccgagttcaagtttcggtgttgc  
gggttcgaatcccgcacggtac  
1-5tRNA-SeC(tca)[70671,70767]  
attctggcactggtggcgagcccaccggcgagcttcaagctgtcgt  
ggccggagaaccgacggaaacatcccgttcaacgcgaccagggcc  
1-6tRNA-Pro(tgg)[94760,94831]  
cggggtgtagtgaaaaggcatcatgctggtttgggtaccagtggttccg  
gttcgagtcggggtccccgac  
1-7tRNA-Trp(cca)[95270,95345]  
aggggtagagccagctgggacggcagcggattccaaacccgccattgacg  
gagttcgattctccgtaccctgccca  
1-8tRNA-Tyr(gta)[95347,95432]  
ccgggtaagccatgttgggtatggcaggcagactgtaaatctgtcgtctt  
cggacttcgggggttcgattccctctaccggacca  
1-9tRNA-Pyl(cta)[96492,96565]  
tgcgagatcgtgcacggcgactaggagcttctaaccctccgactcgcgg  
gttcgactcccgcactcgcaccc  
1-10tRNA-Met(cat)[96713,96787]  
agcgggtgtagagcagctaggtagctcggggtcataaccggaggacg  
cgtgttcgaatcacgccaccgccac  
1-11tRNA-Cys(gca)[96915,96986]  
gcgcctttggcggaatggctacgtgctcggctgcaacccgagttatcccg  
gttcgactccgggagggcgctc  
1-12tRNA-Glu(ctc)[97054,97125]  
gtccccatggggtagtggttaaccctcctggttctcagccaggcgtcccga  
gttcgatcctcgtgggagtg  
1-13tRNA-His(gtg)[97127,97200]  
gtggccgtagttcagccgtagaacgctgggttgtgatccagtcgtcga  
gggttcgagtcctccggtcaccc  
1-14tRNA-Ala(tgc)[97364,97437]  
gggcctatagctcatctggtagagcgctgccttgcaagcaggaggcggc  
aggttcaagtcctgttaggtccac  
1-15tRNA-Phe(gaa)[97626,97698]  
gccgtcatagctcagttggtagagcaccggcctgaaaacccggtggccga

ggttcgagtcctcgtgtcggcac  
1-16tRNA-Val(cac)[97704,97777]  
gtccgttagctcagctggaagagcgctcggccacacccgagaggccgc  
aggttcgatccctgcaatggacac  
1-17tRNA-Lys(ctt)[97896,97968]  
gccttcgtagctcagtggttagagctgtcgcctctaagcgataggctgtt  
ggttcaaatccagccgggggcac  
1-18tRNA-Glu(ttc)[97972,98046]  
ggtcgggtggtctgttggcaggccggtcgggttttcaccccgacattcg  
cgggttcaattcccgtcccgatcgc  
1-19tRNA-Gly(tcc)[98126,98198]  
gcgggtgtggccgaatggctcaggcaccagattccactctggctacgca  
ggttcgattcctgtcatccgctc  
1-20tRNA-Thr(cgt)[98280,98353]  
gtcgtctgtagctcacctggttagagctcggcgtcgtatcccgaaggcatc  
cgggttcgagtcggacagcagctc  
1-21tRNA-Thr(tgt)[98427,98500]  
gcctctgtagctcagtggcagagcaccgatctgtaaatcgggttgtcga  
gcgttcgattcgttctctggggctc  
1-22tRNA-Thr(ggt)[99002,99076]  
gctactgaggcccatatggatgggcgcggccatggttaagccgaggtaga  
tgggttcaagtcctccagtagctc  
1-23tRNA-Gly(gcc)[100546,100619]  
gcgaaggtagctcagctggcagagcgccaccttgccaaggtggaggtcgc  
gggatcgtaacccgttcttcgctc  
1-24tRNA-Asp(gtc)[100623,100695]  
ggccctgtagctcagaggaagagcgccggtctgtcgaatcggaggtcgcg  
gtatcgtaatccgtcagggtcgc  
1-25tRNA-Met(cat)[100755,100827]  
gcctcactagctcattggttagagccgctcgtcataacgtgcaggtacct  
ggttcgattccagggtgaggtac  
1-26tRNA-Ile(gat)[100833,100907]  
gcctgttagcggactggtcgtccgatccaagctgataactggcgtaagc  
ggtgttcgattaccgagcaggtac  
1-27tRNA-Arg(acg)[101001,101073]  
gcctctatggtccaacggatatgacgccggtctacggaaccggagatgcg  
tgttcgattcgcgctaggggcac  
1-28tRNA-Val(gac)[101116,101188]  
gtccgtgtagctcaggggtagagcgctgctcgacacgcaggaggaccga  
ggttcgaaacctcgatggacac  
1-29tRNA-Arg(cct)[101362,101435]  
gcctctgtagctcaacggacagagcaacgcggtcctaacgcggtggctgg  
aggttcgaatcctctcggaggcac  
1-31tRNA-Gln(ttg)[101976,102051]

tggggtatggtggcaatctggcagtcgccgaggactttgactccggaggt  
gcaggttcgagtcctgctaccccatc  
1-32tRNA-Arg(tct)[102055,102130]  
gccctttagctcagtggaacagagcggcgagcttctacctcgccggccgg  
gagttcgaatctctccaggggcacca  
1-33tRNA-Gln(ctg)[128819,128893]  
tgctcgttggtgtaactggcaacactacggactctgactccgtcattta  
ggttcgaatcctaagcgagcagcca  
1-34tRNA-Asn(gtt)[128900,128975]  
tggggtgtccgttaatcaggcaaacgagcggactgttaatccgccctgc  
aggttcgaatcctgccacccagcca

>JN699627.1 Mycobacterium phage Nappy, complete genome

1-1tRNA-Ser(gct)[31854,31937]  
ggagggtagcatctggtgatgcaggggtcctgctaaggccctacggatt  
cacaccgtgagtttcgattactcctccctccgc  
1-2tRNA-Leu(cag)[32034,32110]  
gccctgctgagcaaacggcaaacgctgccgattcagagtcgggtcatt  
tccgggttcgactcccgaggcaggtac  
1-3tRNA-Leu(gag)[32230,32304]  
gtctctgtaggcaaatcgaaaagcccatcttgaggggtggtgcgtg  
cgggttcgactcccgccagagacac  
1-4tRNA-Leu(caa)[32305,32378]  
gccgtggtaggccatctggcgagcccgagttcaagtttcggtgtttgc  
gggttcgaatcccgccacggtac  
1-5tRNA-SeC(tca)[69403,69499]  
attctggcactggtgggcgggccaccggcgagcttcaagctgtcgt  
ggccggagaaccgacggaaacatcccgttcaacgcgacccagggcc  
1-6tRNA-Pro(tgg)[92634,92705]  
cggggtgtagtgaaaaggcatcatgctggtttgggtaccagtgggtccg  
gttcgagtcggggtccccgac  
1-7tRNA-Trp(cca)[93144,93219]  
aggggtagagccagctgggacggcagcgattccaaacccgccattgacg  
gagttcgattctcgtaccctgccca  
1-8tRNA-Tyr(gta)[93221,93304]  
ccggtaagccatgttggttatggcaggcagactgtaaatctgtcgtctt  
cggacttcgggggttcgattccctctaccggac  
1-9tRNA-Pyl(cta)[94096,94168]  
gcaccatttgctcaatggcagagcggcggttctaaaaccgtgagtgccg  
gttcgactccggcatggtgcacc  
1-10tRNA-Met(cat)[94318,94392]  
agcgggtgtagagcagctaggtagctcggggtcataaccggaggacg  
cgtgttcgaatcacgccaccgccac  
1-11tRNA-Cys(gca)[94519,94590]  
gcgcctttggcggaatggctacgtgctcggtgcaacccgagttatcccg

gttcgactccggaggcgctc  
1-12tRNA-Glu(ctc)[94658,94729]  
gctcccatgggtagtggtaacctcctggttctcagccaggcgtcccga  
gttcgactcctcgtgggagtg  
1-13tRNA-His(gtg)[94731,94804]  
gtggccgtagttcagccggtagaacgctgggttgtgatccagtcgtcga  
gggttcgagtcctccggtcaccc  
1-14tRNA-Ala(tgc)[94966,95040]  
gggcctgtagtccaattggtagagcagcatccttgcaagatgacggctg  
tcggttcgaatccgacctggtccac  
1-15tRNA-Phe(gaa)[95230,95302]  
gccgtcatagctcagttggtagagcactggcctgaaaaccagtgggccga  
ggttcgattcctcgtgtcggcac  
1-16tRNA-Val(cac)[95308,95381]  
gtccgttagctcagctggaagagcgctcgggtccacaccgagaggccgc  
aggttcgatccctgcaatggacac  
1-17tRNA-Lys(ctt)[95501,95574]  
gccttcgtagctcagttggtagagctctcgctcttaagcgagatgtcgc  
aggttcgaccctgccggaggcac  
1-18tRNA-Glu(ttc)[95579,95655]  
ggtcgggtcggctgctggatggccagtcggatttctactccggacatt  
cgcgggttcaattcccgtcccgatcgc  
1-19tRNA-Gly(tcc)[95735,95807]  
gcgggtgtggccgaatggctcaggcaccagattccactctggctacgca  
ggttcgattcctgtcatccgctc  
1-20tRNA-Thr(cgt)[95867,95940]  
gctgctgtagctcacctggcagagcgtcggcgtcgtatcccgaaggcatc  
cggttcgagtcggacagcagccc  
1-21tRNA-Thr(tgt)[96014,96087]  
gccctttagctcagttggcagagcaccgatctgtaaatcgggttgtcga  
gcgttcgattcgttctctggggctc  
1-22tRNA-Thr(ggt)[96131,96203]  
gctgggttagctcagttggtagagcgttcctcgggtacgggaaaggcccgg  
ggttcaatccccgactcagctc  
1-23tRNA-Gly(gcc)[97526,97599]  
gcgaaggtagctcagctggcagagcgccaccttgccaaggaggagtcgc  
gggatcgtaacccgttcttcgctc  
1-24tRNA-Asp(gtc)[97603,97675]  
ggccctgtagctcagaggaagagcgccggtctgtcgaatcggaggtcgcg  
gtatcgtaatccgtcagggtcgc  
1-25tRNA-Met(cat)[97735,97807]  
gcctcactagctcattggtagagccgctcgtcataacgtgcaggtacct  
ggttcgattccagggtgaggtac  
1-26tRNA-Ile(gat)[97813,97887]



gcctgtagcggactggctcgtccgatccaagctgataactggcgtaagc  
gggttcgattcaccgagcaggtac  
1-27tRNA-Arg(acg)[97981,98053]  
gcctctatggtccaacggatatgacgccggtctacggaaccggagatgcg  
tgttcgattcgcgctaggggcac  
1-28tRNA-Val(gac)[98096,98168]  
gtccgttagctcaggggtagagcgctgctcgacacgcaggaggaccga  
ggttcgaaacctcgcatggacac  
1-29tRNA-Arg(cct)[98342,98415]  
gcctctgtagctcaacggacagagcaacgcggtcctaacgcggtggctgg  
aggttcgaatcctctcagaggcac  
1-31tRNA-Gln(ttg)[98975,99050]  
tggggtatggtggcaatctggcagtcgcccgaggacttgacttcggaggt  
gcaggttcgagtcctgctaccccatc  
1-32tRNA-Arg(tct)[99054,99127]  
gccctttagctcagtgagacagagcggcgagcttctacctcgcgggccgg  
gagttcgaatctctccaggggcac  
1-33tRNA-Lys(ttt)[99195,99271]  
gggccggtatcttagtctggtcaaagaagcggacttttaatccgcgcgc  
gtgggttcgaatcccacccggcccacc  
1-34tRNA-Gln(ctg)[127392,127466]  
tgctcgttggtgtaactggcaacactacggactctgactccgtcattctt  
ggttcgaatccaggcgagcaacca  
1-35tRNA-Asn(gtt)[127473,127549]  
tggggtgtagttcaatctggcagaacgctcgactgttaatcagtagttg  
aaggttcgagtccttccatcccagcca

>KJ174317.1 Salmonella phage vB\_SalM\_SJ2, complete genome

1-1tRNA-Ser(gct)c[96090,96178]  
ggaaggttccccgagaggtttaagggactcgactgctaatcgagtggggc  
tttagccccgaaggttcgaatccttcacctccgcca  
1-2tRNA-Ile(gat)c[96183,96266]  
gcgggagccataggggttgccagtagccgactgatcatcggcgacgac  
actggacaggttcgaatcctgttctcccgtcca  
1-3tRNA-Asn(gtt)c[96741,96816]  
gacgatgtagttcagtcggtagaacggcgtctgttaaatcgtatgtcgc  
aggttcaagtcctgccatcgtcgcca  
1-4tRNA-Met(cat)c[97683,97759]  
tggtcctgtagctcagtggttaagtagcagtgaaactcataattcattggtc  
gttggttcaaatccaaccaggatcatc

>KJ668714.2 Escherichia phage e11/2, complete genome

1-1tRNA-Lys(ttt)c[69809,69902]  
acggaacgttcggatatggtcgagatatggccttttaaatattgagtag  
cgtcaactgcttgataaccgggttcgaatcccggcggttctgtac  
1-2tRNA-Arg(tct)c[70075,70151]

cggggcatagctcaattgtatagagcaacggacttctaataccgtaggttg  
aaggttagaatccttctgcctcgacca  
1-3tRNA-Met(cat)c[70863,70934]  
ggccctgtagctggaaggtcaagcaagcgactcataatcgccagatggt  
ggtcaattccacccaggcca  
1-4tRNA-Thr(tgt)c[70941,71013]  
gctgatttagctcagtaggtagagcacctcacttgtaatgaggacgtcgg  
cggttcgattccgccaatcagca  
1-5tRNA-Ser(tga)c[71020,71108]  
tggaggcgtggcagagtgtttaatgcaccggtcttgaaaaccggcagtc  
gctccggcgactcataggttcgaatcctatcgctccgt  
1-6tRNA-Pro(tgg)c[71109,71183]  
cttcgtgtagctcagttggtagagcgtctgcttgggagcagaatgtcg  
caggttcaaatcctgcccgagac  
1-7tRNA-Gly(tcc)c[71196,71267]  
gcggatatcgataatggcattacctcagactccaatctgatgtga  
gttcgatttcattatccgctc  
1-8tRNA-Leu(taa)c[71274,71360]  
gcgagaatggtaaattggtaaaggcacagcacttaaatgctgcggaat  
gatttccttggtggttcgagtcaccttctctgacca  
1-9tRNA-Gln(ttg)c[71361,71434]  
tgggaattagccaagttggttaaggcatagcacttgactgctagatgcaa  
aggttcgagtcctttattcccage

>KJ451625.1 Bacillus phage Bcp1, complete genome

1-1tRNA-Ser(gct)[30794,30882]  
ggaagggtactcaagttggtgaagaggtcagttgctaaactgatagtac  
ctattacaggtagcaagggttcgaaccccttcctcca  
1-2tRNA-Cys(gca)[30893,30966]  
gagggtgtaccgaagcggtcaacggcacagattgcaaccctgttgctcg  
tgggttcaaatcccaccatcctct  
1-3tRNA-Asn(gtt)[31012,31087]  
gtgctttagctcagtcggtagagctggtggctgtaaccactgtgtcgt  
aggttcgattcctacctagcacgcca  
1-4tRNA-Gly(tcc)[31091,31165]  
ggggcattgggtatattggctattactcttggctccaaccaagcaagtc  
ggttcgattccgacatgtccctcca  
1-5tRNA-Asp(gtc)[31170,31243]  
ggctcggttagttaacggtaaaatacatgactgtctatcatgggtcacgg  
gttcaactcccgtacgggtcgcca  
1-6tRNA-Glu(ttc)[31252,31327]  
tggcgattggtgaagcgggttaacacactcggcttctaccgaggatgc  
gtgggtcgatccccacatgcgctat  
1-7tRNA-Ile(tat)[31330,31403]  
atccctttagccaagttggtcaaggcagtaggattatgtcctgcgtagcgg

aggttcgactcctccaagggcg  
 1-8tRNA-Arg(tct)[31523,31598]  
 taccctttagccaagtggactaaggcaacgggcttctatcccgaagatc  
 gtgggttcaaatcctacaggggtgt  
 1-9tRNA-Ser(tga)[31689,31774]  
 caggaataactcaaacggttaagaggtagtcttgaaaactactaggcgt  
 gaaagcgtgcgggggttcgaatccctcttctcggc  
 1-10tRNA-Gln(ttg)[31854,31929]  
 ttccgtgtggacaaactggtaaagtcgtcaggcttgaccctgaagttt  
 ggaggttcgacccttcaccgaagt  
 1-11tRNA-His(gtg)[32007,32080]  
 cagtgtgtgtgaagtggctaacacggacgactgtggatcgttcattcg  
 caggttcgaatcctgtcatgctga  
 1-12tRNA-Pro(tgg)[32177,32249]  
 gtggatataggctagttggtcagtcactccgttggggcggaggtcacgc  
 aggttcgactcctgctatccgca  
 1-13tRNA-Phe(gaa)[32351,32425]  
 ggatagatagctgagatggattagcagtggttgaaccactagaggtt  
 ggatcgttaccactctgtccacca  
 1-14tRNA-Tyr(gta)[32432,32514]  
 gggcgtgcaatcattggagagataagctgactgtaaatcagtggtcattg  
 actgtgaaggttcgaatccttcattccacca  
 1-15tRNA-Leu(taa)[32516,32602]  
 atcggaatgttggaattggtagacataacggacttaaaatccgttgctcc  
 ttggggcgtgaggggtcagtcctcttccgatacca  
 1-16tRNA-Ile(gat)[32604,32678]  
 actagtgtagctcagaggtagagcagtgcttgataaggcattggctgtt  
 ggtcaatccaaccactagtagca  
 1-17tRNA-Leu(tag)[32686,32770]  
 tgtcggagtggtggaactggatatacatcggcacttagaatgccgtgcct  
 tcgggattgaggggtcgcactccctccttcgacatc  
 1-18tRNA-Met(cat)[32921,32995]  
 tacggttatagctcagtggttagagtggtgtcctaagcccaaggcga  
 tgggtcaatcccatctaaccgtatc

>KF156338.1 Synechococcus phage S-MbCM7, complete genome

1-1tRNA-Leu(taa)[17996,18079]  
 gcgagtatggcggaatcggttagacgcatcagacttaaaatctgctgacca  
 ctggtcgtgggagttcaagtcctcattcgac  
 1-2tRNA-Thr(tgt)[19399,19472]  
 gccactttagctcagttggatagagcaacggttttgtaaaccgtaggctg  
 tcggttcaagtccgacatgtgct  
 1-3tRNA-Asn(gtt)[19498,19572]  
 ttctctatagctcagatggtagagcagtgactgttaatcactatgtcc  
 ctggttcgatcccaggtggaggagt

1-4tRNA-Arg(tct)[152502,152577]  
gtctcagtagctcagatggatagagcaattcacttctaataattggtcg  
ggggttcgagtcctcctgagacgcc  
1-5tRNA-Leu(tag)[152580,152662]  
gtcggatggcggaattggtagacgcgctggttttaggtaccagtgtctt  
atgacgtggaggttcaagtcctcttaccgacac  
1-6tRNA-Val(tac)[152665,152736]  
gctcgaatagctcagaggtagacacctcctttacacggagattgtcggg  
ggttcgatcccctcttcgagca  
1-7tRNA-Gly(tcc)[15268,155340]  
gcgagtgtagttcagtggtagaacgttagcctccaagctaaatgtcgtc  
ggttcaagtcgatctctcgtc

>JN699626.1 Mycobacterium phage MoMoMixon, complete genome

1-1tRNA-Ser(gct)[31665,31748]  
ggagggtagcatctggtgatgcaggggtcctgctaaggccctacggatt  
cacacccgtgagtttcgattactcctccctccgc  
1-2tRNA-Leu(cag)[31845,31921]  
gccctgctgagcaactggcaaaagctccgcattcagagtgcgggtcatt  
tccgggttcgactcccgggcagggtag  
1-3tRNA-Leu(gag)[32041,32115]  
gtctctgtaggcaatcggaagccgcatcttgaggggtggtgcgtg  
cgggttcgactcccgcagagacac  
1-4tRNA-Leu(caa)[32116,32189]  
gccgtgtaggcatctggcgagcccgagttcaagtttcggtgtttgc  
gggttcgaatcccgcacggtag  
1-5tRNA-SeC(tca)[67969,68065]  
attctggcactggtggcgagcccaccggcgagcttcaagctgtcgtc  
ggccggagaaccgaccggaacatcccgttcaacgcgacccagggcc  
1-6tRNA-Pro(tgg)[91238,91312]  
cggggtgtagttcagtttgaagagcgttggtttgggaccaagttgtcg  
caggttcgaatcctgtcaccgac  
1-7tRNA-Trp(cca)[91327,91397]  
gggtctgtgcacaggtgccccgacggtctcaaagccgaaggcgggggtt  
cgattccctccagcctgcca  
1-8tRNA-Pyl(cta)[92594,92666]  
gcaccattgtcfaatggcagagcggcggttctaaaaccgtgagtgccg  
gttcgactccggcatggtgcacc  
1-9tRNA-Met(cat)[92816,92890]  
agcgggtgtagagcagctaggtagctcggggtcataaccggaggacg  
cgtgttcgaatcacgccaccgccac  
1-10tRNA-Cys(gca)[93017,93088]  
gcgcctttggcggaatggctacgtgctcggtgcaaccgagttatcccg  
gttcgactccgggaggcgctc  
1-11tRNA-Glu(ctc)[93093,93167]

gggccgttggagtagatggatatctgccaccctctcaaggtggagatca  
cgggttcaagtcccgtacggactgc  
1-12tRNA-His(gtg)[93169,93242]  
gtggccgtagttcagccggtagaacgctgggttgtgatcccagtcgtcga  
gggttcgagtcctccggtcaccc  
1-13tRNA-Ala(tgc)[93404,93478]  
gggcctgtagctccaattggtagagcagcatccttgcaagatgacggctg  
tcggttcgaatccgacctggtccac  
1-14tRNA-Phe(gaa)[93668,93740]  
gccgtcatagctcagttggtagagcactggcctgaaaaccagtgggccga  
ggttcgattcctcgtgtcggcac  
1-15tRNA-Val(cac)[93746,93819]  
gtccgtttagctcagctggaagagcgctcggccacacccgagaggccgc  
aggttcgatccctgcaatggacac  
1-16tRNA-Lys(ctt)[93938,94010]  
gccttcgtagctcagtggtagagctgtcgcccttaagcgataggctgtt  
ggttcgaatccagccgggggcac  
1-17tRNA-Glu(ttc)[94015,94091]  
ggtcgggtcggctcgtcgtatggccagtcggatttctactccggacatt  
cgcgggttcaattcccgtcccgatcgc  
1-18tRNA-Gly(tcc)[94171,94243]  
gcgggtgtggccgaatggctcaggcaccagattccactctggctacga  
ggttcgattcctgtcatccgctc  
1-19tRNA-Thr(cgt)[94303,94376]  
gtcgtcgtagctcacctggcagagcgtcggcgtcgtatcccgaaggcatc  
cgggttcgagtcggacagcagctc  
1-20tRNA-Thr(tgt)[94450,94523]  
gccttcgtagctcagtggcagagcaccgatctgtaaatcgggttgtcga  
gcgttcgattcgttctcgggctc  
1-21tRNA-Thr(ggt)[94567,94639]  
gctgggttagctcagtggttagagcgttcccttggtatgggaaagggccgg  
ggttcaatcccccgactcagctc  
1-22tRNA-Gly(gcc)[95962,96035]  
gcgaaggtagctcagctggcagagcgccaccttgccaaggtggaggtcgc  
gggatcgtaacccgttcttcgctc  
1-23tRNA-Asp(gtc)[96039,96111]  
ggccctgtagctcagaggaagagcgccggtctgtcgaatcggaggtcgcg  
gtatcgtaatccgtcaggtcgc  
1-24tRNA-Met(cat)[96171,96243]  
gcctcactagctcattggtagagccgctcgtcataacgtgcaggtacct  
ggttcgattccagggtgaggtac  
1-25tRNA-Ile(gat)[96249,96323]  
gcctgttagcggactggtcgtccgatccaagctgataactggcgtaagc  
ggtgttcgattaccgagcaggtac

1-26tRNA-Arg(acg)[96417,96489]  
gcctctatggtccaacggatatgacgccgtctacggaaccggagatgcg  
tggtcgattcgcgctaggggcac  
1-27tRNA-Val(gac)[96532,96604]  
gtccgtgtagctcaggggtagagcgctgctcgacacgcaggaggaccga  
ggttcgaaacctcgcatggacac  
1-28tRNA-Arg(cct)[96778,96851]  
gcctctgtagctcaacggacagagcaacgcggtcctaacgcggtggctgg  
aggttcgaatcctctcggaggcac  
1-30tRNA-Gln(ttg)[97392,97467]  
tggggtatggtggcaatctggcagtcgcccgagcttgactccggaggt  
gcaggttcgagtcctgctaccccatc  
1-31tRNA-Arg(tct)[97471,97544]  
gccctgttagctcagtgagacagcggcgagcttctacctcggggccgg  
gagttcgaatcctcaggggcac  
1-32tRNA-Lys(ttt)[97612,97688]  
gggccggtatcttagtctggtcaaagaagtggaactttaatccgcgcgc  
gtgggttcgaatccaccggccacc  
1-33tRNA-Gln(ctg)[126103,126177]  
tgctcgttggtgtaactggcaacactacggactctgactccgtcattta  
ggttcgaatcctaagcgagcagcca  
1-34tRNA-Asn(gtt)[126184,126259]  
tggggtgtccgttaatcaggcaaacgagcggactgttaatccgcccctgc  
aggttcgaatcctgccacccagcca

>KF582788.2 Escherichia phage vB\_EcoM\_JS09, complete genome

1-1tRNA-Met(cat)[95924,95998]  
ggccctgtagctcaatgggagagctgtcagctcataactgataggtagct  
ggatcgaaaccagccagggtcacca  
1-2tRNA-Arg(tct)[96002,96078]  
cgaggcatagctcaattgtatagagcaacggacttctaaccgtaggttg  
aaggttagaatcctctgtctcgacca

>KJ190158.1 Escherichia phage vB\_EcoM\_FFH2, complete genome

1-1tRNA-Pro(tgg)c[61919,61995]  
ctccgcgtagctcagcttggttagagcgctgatttgggatcaggaggtcg  
agtgttcgaatcactccgtggagacca  
1-2tRNA-Met(cat)c[62007,62081]  
ggccctgtagctggaaggttaagcaagcgactcataatcgccagacggt  
ggttcaattccaccagggccacca  
1-3tRNA-Thr(tgt)c[62083,62158]  
gctgatgtagcacaatcggtagtgcaattgatttgaatcaataggttgt  
aggttcaagtcctgccatcagcacca  
1-5tRNA-Ser(tga)c[62361,62451]  
ggagggtaggagcaatggtgctcaagcggtcttgaaaaccgtcccgttg  
aggatgactcgaatggttcgattccattactctccgcca

1-6tRNA-Tyr(gta)c[62566,62652]  
ggggagtatcccgtagaggtagcgggtgtagactgtaaatctattgtcat  
tgcgactcgggtggttcgactccaccactccccacca  
1-7tRNA-Arg(tct)c[62657,62731]  
gccctgtagcttagtgataaagcagcgccctctaagccgttgacact  
ggttcgagtcagtagcgggtgcca

>JN412592.1 Mycobacterium phage LinStu, complete genome

1-1tRNA-Ser(gct)[31919,32002]  
ggagggtagcatctggtgatgcaggggtcctgctaaggccctacggatt  
cacaccgtgagtttcgattactctccctccgc  
1-2tRNA-Leu(cag)[32099,32175]  
gccctgctgagcaactggcaaaagctgccgattcagagtcggggtcatt  
tccgggttcgactcccgaggcagggtac  
1-3tRNA-Leu(gag)[32295,32369]  
gtctctgtaggcaaatcgaaaagccgcatctgaggggtggtgcgtg  
cgggttcgactcccgccagagacac  
1-4tRNA-Leu(caa)[32370,32443]  
gccgtggtaggccatctggcgagccgagttcaagtttcggtgtttgc  
gggttcgaatcccgccacggtac  
1-5tRNA-SeC(tca)[68341,68437]  
attctggcactggtggcgagcccaccggcgagcttcaagctgtcgt  
ggccggagaaccgaccggaacatcccgttcaacgcgacccagggcc  
1-6tRNA-Pro(tgg)[91636,91710]  
cggggtgtagttcagtttgaagagcgcttggttgggaccaagatgtcg  
caggttcgaatctgtcaccggac  
1-7tRNA-Trp(cca)[91725,91795]  
gggtctgtgcacagggtgcccagcgtctccaaagccgaaggcgggggtt  
cgattccctccaggcctgcca  
1-8tRNA-Pyl(cta)[92932,93005]  
tgcgagatctgcacggcgactaggagcttcaacctccgactcgcgg  
gttcgactcccgcatctcgaccc  
1-9tRNA-Met(cat)[93154,93228]  
agcgggttagagcagctaggtagctcgccgggctcatgaccggaggacg  
cgtgttcgattcacgccaccggcac  
1-10tRNA-Cys(gca)[93356,93427]  
gcgccttggcggaatggctgcgtgctcggtgcaacccgagttatccc  
gttcgactccgggaggcgctc  
1-11tRNA-Glu(ctc)[93495,93566]  
gtcccatgggtagtggttaacctcctggttctcagccaggcgtccga  
gttcgatcctcgtgggagtg  
1-12tRNA-His(gtg)[93621,93694]  
gtgtagtagttcagatggaagaacgtgccttgtgacggcgaaggtcgg  
gggttcgaagcccctctatcacc  
1-13tRNA-Ala(tgc)[93858,93931]

gggcctatagctcatctggtagagcgctgccttgcaagcaggaggcggc  
aggttcaagtcctgttaggtccac  
1-14tRNA-Phe(gaa)[94121,94193]  
gccgtcatagctcagttggtagagcactggcctgaaaaccagtgccga  
ggttcgagtcctcgtgtcggcac  
1-15tRNA-Val(cac)[94199,94272]  
gtccgttagctcagctggaagagcgctcggcccacaccgagaggccgc  
aggttcgatccctgcaatggacac  
1-16tRNA-Lys(ctt)[94391,94463]  
gccttcgtagctcagtggtagagctgtcgcctttaagcgataggtcgtt  
ggttcaaatccagccgggggcac  
1-17tRNA-Glu(ttc)[94467,94542]  
gttcgggtggtctgttggcaggccggtcgggttttaccgccggtcatc  
cggggttcgattcccgtcccactgc  
1-18tRNA-Gly(tcc)[94672,94744]  
cggggtgtggccgaatggctcaggcaccagacttcactctggctaagca  
ggttcgattcctgtcatccgctc  
1-19tRNA-Thr(cgt)[94804,94878]  
gtctgttagctcacctggcagagcgtcggcgtcgtatcccgaaggcatc  
cggttcgagtcggacagcagcccc  
1-20tRNA-Thr(tgt)[94879,94951]  
gcctctgtgtccagcgccacggacatccgccttgtaagcggaggacccc  
cgttcgatccgggtagaggctc  
1-21tRNA-Thr(ggt)[95359,95431]  
gtcgggttagctcagtggtagagcgttcctctggtatgggaaagggccgg  
ggttcaatcccccgattcagctc  
1-22tRNA-Gly(gcc)[96754,96827]  
gcgaaggtagctcagctggcagagcgccaccttgccaaggtggaggtcgc  
gggatcgtaaccgttcttcgctc  
1-23tRNA-Asp(gtc)[96831,96903]  
ggccctgtagctcagaggaagagcgccggtctgtcgaatcggaggtcgcg  
gtatcgtaatccgtcagggtcgc  
1-24tRNA-Met(cat)[96963,97035]  
gcctcactagctcattggtagagccgctcgtcataacgtgcaggtacct  
ggttcgattccagggtgaggtac  
1-25tRNA-Ile(gat)[97041,97115]  
gcctgttagcggactggtcgtccgatccaagctgataactggcgtaagc  
ggtgttcgattcaccgagcaggtac  
1-26tRNA-Arg(acg)[97209,97281]  
gcctctatggtccaacggatatgacgccggtctacggaaccggagatgcg  
tgttcgattcgcgctaggggcac  
1-27tRNA-Val(gac)[97324,97396]  
gtccgttagctcaggggtagagcgctcgtcgcacgcaggaggaccga  
ggttcgaaacctgcatggacac



1-28tRNA-Arg(cct)[97570,97643]  
gcctctgtagctcaacggacagagcaacgcggtcctaacgcggtggctgg  
aggttcgaatcctctcggaggcac

1-30tRNA-Gln(ttg)[98184,98259]  
tggggtatggtggcaatctggcagtcgccgacattgactccggaggt  
gcaggttcgagtcctgctaccccatc

1-31tRNA-Arg(tct)[98263,98338]  
gcccttgtagctcagtggaacagagcggcgagcttctacctcgccggccgg  
gagttcgaatctctccaggggcacca

1-32tRNA-Gln(ctg)[124919,124993]  
tgctcgttggtgtaactggcaacactacggactctgactccgtcattctt  
ggttcgaatccagggcgagcaacca

1-33tRNA-Asn(gtt)[125000,125075]  
tggggtgtccgttaatcaggcaaacgagcggactgttaatccgtccctgc  
aggttcgaatcctgccaccccagcca

>GU396103.1 Aeromonas phage PX29, complete genome

1-1tRNA-Ala(cgc)c[84087,84161]  
tcgcgattagttcagtgaggagaacacctttgatcgcaaagaagtatcgag  
tacggttcgaatccgttatagtgtg

1-2tRNA-Leu(tag)c[93173,93257]  
gcggatgtggtgaaattggcagtcacactagatttaggatctagcgcctc  
cgggcatgtcgggtcagtcgaccatccgcacca

1-3tRNA-Ser(gct)c[93264,93351]  
ggagaaatgacagagaggccgaacgtagcggattgctaattcgtaggccc  
gcaagagtccgtgggttcgaatcccactttctcctcca

1-4tRNA-Ser(tga)c[93708,93799]  
ggaagcgtggcagagtcggcttattgcaacactcttgaaggtgcggc  
ggttaaccccgctccatccgttcgaatcggatcgctccgcca

1-5tRNA-Gln(ttg)c[93940,94013]  
aggggtatagccaagttggttaaggcaacggactttgattccgtcatgcac  
tggttcgagcccagttacccccgc

1-6tRNA-Pro(tgg)c[94126,94200]  
ccgtcattagcgcagtcggtagcgcacatctggttgggatcagagggtca  
taggttcaaatacctatatgacggac

1-7tRNA-Phe(gaa)c[94347,94423]  
gcatcggttaactcagtatggttagagtgccggttgaaaatccgctggtca  
ctggttcaagtccagtcgatgcacca

1-8tRNA-His(gtg)c[94431,94507]  
gtggcggtagttcagtttggtagaactcaggttgatcctgatagtca  
cgggttcgaagcccgctccgccaccca

1-9tRNA-Thr(tgt)c[94589,94673]  
gctcggttggcagagtggttgaaatgcactggtttgtaatccagaccgaa  
aggcatcgcaagttcgaatctgtgccgagcacca

1-10tRNA-Tyr(gta)c[94683,94774]

ggatgtgctgcaatgacggagggtattgcaccagactgtaaatctggcccc  
 acagggtaaacgtttaggttcgaatcctaccgcatccacca  
 1-11tRNA-Met(cat)c[94799,94873]  
 tgcgagttggaggagaggccgctcctcgctgggctcatatcccagagatca  
 cctgttcgaatcagggtactcgcttc  
 1-12tRNA-Glu(ttc)c[94894,94969]  
 tctccgttcgtctagtggactaggacactgccctttcacggcggaacat  
 ggattcgaattccatacggagaacca  
 1-13tRNA-Met(cat)c[95503,95577]  
 ggtgcattagctcagtggttagagctcggtttcatacggcgtcggtcagt  
 agttcaaatctactatgcaccacca  
 1-14tRNA-Lys(ttt)c[95770,95845]  
 ccgccgttagctcaactggtagagcaatcggttttaaccgatataggttg  
 tggatcataccaccacggcggacca  
 1-15tRNA-Trp(cca)c[95853,95925]  
 taggggcgtagcaaatcggttatcggcggattccaaatccgttgaggtg  
 ggttcgactcctaccgcccctga  
 1-16tRNA-Cys(gca)c[96741,96815]  
 gcgcaggtagccaagaggtgaaggcaagtattgcaaatcactttatcgctc  
 tgttcgatccagatcctgtgtcca  
 1-17tRNA-Gly(tcc)c[96825,96898]  
 gcctcattggtgtagtggtcacataccgtcctccaagtcgtagtgcgg  
 gttcgattcccgaatgaggctcca  
 1-18tRNA-Ala(tgc)c[96967,97041]  
 gggggttagctcagttggaacgagcagctggtttgcaaccagtaggtca  
 agggttcgagcccctaacctccac  
 1-19tRNA-Asp(gtc)c[97317,97393]  
 agtgacgtagtttagttggttaaaattccggcctgtcacgtcggagagcg  
 cgggttcgagccccgtcgtcactgcca  
 1-20tRNA-Ile(gat)c[97400,97474]  
 agccatgtagctcagtggttagagcacacccctgataagggtggggtcggc  
 agttcaatcctgccatggctacca  
 1-21tRNA-Asn(gtt)c[97611,97692]  
 ggagacgtggctcaaaggttagcgacggactgttaatccgtgaggttaa  
 ctctatgctgggttcgagtcagccgctcctccgc  
 1-22tRNA-Leu(taa)c[100895,100979]  
 gcggatatggcgtaaatcggtagccgcaggggatttaaaatccaagtctt  
 cgggcgtgtgggttcgagtcctactatccgcacca  
 1-23tRNA-Leu(caa)c[100987,101069]  
 gggagattgggtgaattggttagccgagtggaattcaaaatctaccgtctt  
 ctgacgtaccgggttcgagtcgggtatctccac  
 >JQ691611.1 Cronobacter phage CR9, complete genome  
 1-1tRNA-Thr(tgt)[148134,148209]  
 gctggattagctcagttggttagagcaactgatttgaatcagaaggtcgc

gggttcgaacctgcatccagcacca  
1-2tRNA-Cys(gca)[148216,148292]  
gcaacgttcccgagctctggtaacggctctcgctgcaaacgagatgagca  
ctggttcgaatccagtacgttgctcca  
1-3tRNA-Leu(caa)[148294,148373]  
gcccctctggcccaacaaaaggtagaggcgctgctttcaaacggcaggag  
ttcccgggttcgaccccgaggaggggcacca  
1-4tRNA-Tyr(gta)[149115,149201]  
gctgtgatagaccgtaggggtagcggggcagactgtaaatctgctgttca  
tagaactcgggtggttcgactccatctcgcagcacca  
1-5tRNA-Ser(gga)[149208,149302]  
agtaggatggctgagtggcttaaagcagcatcttgaaaggtgtcggatc  
aggtaacccctgggtcccgggagttcaaactcctcctactgcca  
1-6tRNA-Lys(ttt)[149369,149445]  
ggatcgttagctcaattggttagagcaagggactttaatcccagggttc  
gggggttcgagtcctgacgggtccacca  
1-7tRNA-Asn(gtt)[149613,149688]  
tgacggtgagcatatatggacatcgggggcctgttaagcccaggalaac  
tggttcgaatccagtaccgtcagcca  
1-8tRNA-Glu(ttc)[149740,149817]  
gcacctatcgtctaattggaataggacaccgaccttcacgtcggaat  
acgggttcgagtcctcgttgggtgtacca  
1-9tRNA-Asp(gtc)[149912,149987]  
ggtcctatggtattagcggaaaacatactcccctgtcacgggagagtcac  
gggttcgaatcccgttaggaccgcca  
1-10tRNA-Ile(gat)[149994,150069]  
tggggattagctcagttggttagagcgctcgaccgataatcgagaggtcac  
tgggtcaagtccagatccccaacca  
1-11tRNA-Pro(tgg)[150074,150150]  
cgggtgtagctcagtttggttagagcgattgctttgggagcattaggtcc  
gaggttcgaatcctcgtacaccgacca  
1-12tRNA-Met(cat)[150157,150231]  
tgcgaggtagttcagcggtagaacaggggtctcatcgcctcatgtcggc  
agttcgattctgcccttcgcaacca  
1-13tRNA-Leu(tag)[150238,150315]  
gctccagtagcccaattggttagaggcacttgatttaggatcatgtcagt  
atgagttcgaatctctcctggagtacca  
1-14tRNA-Gly(tcc)[150324,150400]  
gcatccatagtgtagcggcctaacactccgtcctccaagtcggaaccc  
tcggttcgaatccgagtggatgctcca  
1-15tRNA-Gln(ttg)[150441,150516]  
aggggattagtttaattggcaaacagcgggtttgatcccgtaacgcg  
aggttcgaatcctccatcccccgcca  
1-16tRNA-His(gtg)[150589,150664]

gtggccttaattcagtaggtagaatccccggttggaaccgggcagtcgt  
 gggttcaagtcccacaggtcacccca  
 1-17tRNA-Ser(tga)[150669,150761]  
 ggaaggtagggcgtagtggtacgcacccggatttgaacccggcccgctg  
 tggcgacccacggtgatagttcgactctattatcttccgcca  
 1-18tRNA-Ser(gct)[150766,150852]  
 agaagagtggcgaatcggtagccgcaccggactgctaatacgggggtccc  
 taggggcctgagagttcaagtcctctcttctgcca  
 1-19tRNA-Phe(gaa)[150950,151025]  
 ggaactgtagctcagttggtagagcggttgcctgaagagcatcgctcgg  
 cggttcaaatccgttcagttccacca  
 >KF534715.1 Pectobacterium phage PM1, complete genome  
 1-1tRNA-Cys(gca)[15487,15560]  
 ggggtgatgtcagaatggttatgtggcgattgcaaatccgcttatactg  
 gttcgattccagttgtaccctcca  
 >KJ025957.1 Serratia phage PS2, complete genome  
 1-1tRNA-Gly(tcc)c[66451,66526]  
 gcggtttagctcagttggtagagcttctgattccaatcagactgtcgt  
 cggttcgaacccgatcagccgctcca  
 1-2tRNA-Arg(tct)c[68385,68460]  
 gccctttagttagtggtatagcacacgatcgttctaaggctcggtagcct  
 gggttcgaatcctagcaggggtacca  
 1-3tRNA-Met(cat)c[68919,68992]  
 gccctgtagctggacggtcaagcgagcgactcataatcgctggatggtg  
 gttcgattccaccagggccacca  
 1-4tRNA-Trp(cca)c[69518,69591]  
 aggggattagcctagtggttaggcagtggttccaaatccatctagagag  
 gttcgattcctctatccccctgcca  
 >KJ489400.1 Bacillus phage Hoody T, complete genome  
 1-1tRNA-Asn(gtt)[32368,32442]  
 tgtgctttagctcagtcggttagagctggtggctgtaaccactgtgtcg  
 taggttcgagccctacctagcacgt  
 1-2tRNA-Gln(ttg)[32448,32520]  
 tgctcttagccaagcggttaaggcacgggacttgcactctggacgcgct  
 agttcgaatctagcagaggcatc  
 1-3tRNA-Trp(cca)[32689,32762]  
 gggagtttagtttagtggtaaaacctcggtctcaaaaccgaagtcatat  
 gttcgattcgtagctctgcca  
 1-4tRNA-Ser(tga)[32764,32851]  
 ggagggttggcagagtggtatttgcagcggcttgaaaaccgcccagggg  
 taaaacctccgtgagttcaaatctcacacctctcca  
 1-5tRNA-Asp(gtc)[32853,32926]  
 tggggatatagtgtagaggtaaacacgcacggctgtctaccgtgaagcac  
 ggggtcgaatcccgttatcctcgt

1-6tRNA-Leu(tag)[33071,33148]

tgccgaagtaatccaatcaggtagatagcggtttagaaaccgtccag  
tgtgggttcgacccctccttcggtatc

1-7tRNA-Tyr(gta)[33155,33238]

tgccagaatagtcgaagcggaacgacaggtgactgtaaatcacccctcat  
tcgagttctcaggttcgagtcctgattctgctat

1-8tRNA-Ser(gct)[34151,34237]

ggaggggtactcaagcggcgaagagggggacttgctaagtccttagtacc  
ttaacaggtagcaggggtcgaatccctcccctcct

>KJ489397.1 Bacillus phage CAM003, complete genome

1-1tRNA-Asn(gtt)[32547,32621]

tgtgctttagctcagtcggtagagctggaggctgtaaccactgtgtcg  
taggttcgagccctacctagcacgt

1-2tRNA-Gln(ttg)[32627,32699]

tgcccttagccaagcggtaaggcacgggacttgactctcggacgcgct  
agttcgaatctagcagaggcatc

1-3tRNA-Trp(cca)[32868,32941]

aggagtttagtttagtggtaaacctcggctcctcaaacccaagtcatalat  
gttcgattcgtatagctcctgccca

1-4tRNA-Ser(tga)[32943,33030]

ggaggggttgccagagtggtattatgcagcggcttgaaaaccgccgaggg  
taaacctccgtgagttcaaatctcacaccctcctcca

1-5tRNA-Asp(gtc)[33032,33105]

tggggatatagtgtagaggtaaacacgcacggctgtctaccgtgaagcac  
gggttcgaatcccgttatcctcgt

1-6tRNA-Leu(tag)[33250,33327]

tgccgaagtaatccaatcaggtagatagcggtttagaaaccgtccag  
tgtgggttcgacccctccttcggtatc

1-7tRNA-Tyr(gta)[33334,33417]

tgccagaatagtcgaagcggaacgacaggtgactgtaaatcacccctcat  
tcgagttctcaggttcgagtcctgattctgctat

1-8tRNA-Ser(gct)[34330,34416]

ggaggggtactcaagcggcgaagagggggacttgctaagtccttagtacc  
ttaacaggtagcaggggtcgaatccctcccctcct

>KJ094033.1 Listeria phage LP-048, complete genome

1-1tRNA-Met(cat)c[27810,27883]

ttgtcccgtagctagaaggtcgagcaaggagctcataactcctcggttg  
ggttcgattccaacggggcaatc

1-2tRNA-Pro(tgg)c[28776,28850]

caggggtgtagctcagtttggttagagtacccgcttgagagcgggaagtc  
gtaggttcgaatcctaccacctga

1-3tRNA-Arg(tct)c[29970,30040]

gtccttatggtgtagtgatgcacaagggaatttactcccttagcgcgg  
gttcgaatcctgctgaggact

1-4tRNA-Gly(tcc)c[30298,30368]  
 gcgggtatagtataagggtagtagtaccacaggtttccaacatgtagtgggg  
 gttcgaatccccctaccgct  
 1-5tRNA-Asn(gtt)c[30437,30510]  
 gtgtccttaactcagaggtcagagtgccgtcctgttaagtcggaagtcgc  
 tggttcaaatccagcaggatacgc  
 1-6tRNA-Ser(tga)c[31132,31223]  
 ggaaggttggtagagcttggtaatcgcctagcttgaactagttgcc  
 ctcgtaatacagggtacaagggttcgaatcccttaccttct  
 1-7tRNA-Phe(gaa)c[31236,31307]  
 gtagtcctagctgagatggattagcgttgcctgaaaagcaagagaggca  
 ggttcgatacctcggactcca  
 1-8tRNA-Lys(ttt)c[31313,31384]  
 ggagttatgggtgaatggctatcactcgggttttaccctgtattcta  
 ggttcgaatcctagtggtcca  
 1-9tRNA-Trp(cca)c[31509,31582]  
 taggggtatagtttatctggtaaaattggttccaactccaatgaggt  
 ggggtcaagtcctactatccctgt  
 1-10tRNA-Gln(ttg)c[31584,31656]  
 tggctctgtagccaagcggtaaggcaacggattttgattccgtgatacgtt  
 ggttcgaatccaactagaccagc  
 1-11tRNA-Thr(tgt)c[31675,31746]  
 gcttgatagttcaattggtagaacagtggtttgtaagcctcagacgtg  
 ggttcaagtcctactacaagca  
 1-12tRNA-Tyr(gta)c[31829,31910]  
 gtgtcattcgcatagaggcaattgcaggggattgtaactcccccccttc  
 ggggtccaaggttcgagtccttgatggcaca  
 1-13tRNA-Leu(tag)c[32229,32313]  
 tgccgagatggtggaactggtatacacggtagacttagaatctgctgtcc  
 caaggatatgtgggttcgaatcccactctcggtat  
 1-14tRNA-Asp(gtc)c[32779,32851]  
 gtgcgtatgatataatggctattatactcactgtctatcgagaaatagg  
 ggttcgattccccttacgtgcgc  
 1-15tRNA-Ile(gat)c[32955,33027]  
 accgcatagcttaggaggcaaagcaaccgaccgataatcggtagtcctt  
 ggttcaattccaagtgttggtac  
 1-16tRNA-Ser(gct)c[33204,33290]  
 ggagagttgtcagataggcttaatgatacgggtgctaactcgttgact  
 agtaatagtagcaagggttcgaatcccttactctct  
 1-17tRNA-Cys(gca)c[33371,33441]  
 gcgggtataaccaactggaaaggtagtagactgcaaatctacgtatatgg  
 gttcaattcccattaccgct  
 >KM051843.1 Bacillus phage Bobb, complete genome  
 1-1tRNA-Met(cat)c[128786,128860]

tgggtctctagcttagtggttaaagctgccagctcataactggttaagagag  
gggttcgaatcccttgggaccatc  
1-2tRNA-Trp(cca)c[129919,129993]  
tgagggtctagctcaactggtagagcgtcggtctcctcaaaaccgaaggta  
cagggtcagtcctgtggctcttgt  
1-3tRNA-His(gtg)c[130822,130892]  
gagaatgtagcttaacggtaaagcgtgggacgtgactccagctatccaa  
gttcgattcttggtattctca  
1-4tRNA-Gly(tcc)c[130903,130976]  
gtggtcttagtttaatggtagaacagtcggtttccaccgcagatatgg  
gttcaactcccttagaccatacca  
1-5tRNA-Met(cat)c[132152,132225]  
tacgatgctgaggggtcggtacccgacgaggtctcataagccttgtttag  
taagttcaactctgccttagcaa  
1-6tRNA-Phe(gaa)c[132299,132373]  
tggactggtagctcagttggtagagcaggggctgaaaatccctgtgtcg  
gaggttcgaatccttctcagtcct  
1-7tRNA-Asn(gtt)c[132750,132823]  
ttgtcgataactcaatggtagagtgtgactgttaatacaagaagttgt  
aggttcgagtcctactacgacagt

>KJ174318.1 Salmonella phage vB\_SalM\_SJ3, complete genome

1-1tRNA-Ser(gct)c[81717,81805]  
ggaaggttgcgcgagaggttaagggactcgactgtaacgagtgaggc  
tttagcccccgaaggttcgaatccttcaccttcgcca  
1-2tRNA-Tyr(gta)c[81881,81962]  
gtgagtggtgcagagcggtcgaatgcgcctgactgtaaatcaggtatccc  
acgcggtggttcaatccatccactcacacca  
1-3tRNA-Asn(gtt)c[82719,82794]  
gacgatgtagttcagtcggtagaacgcggtctgttaaacgtatgtcgc  
aggttcaagtcctgccatcgtcgcca  
1-4tRNA-Met(cat)c[83207,83282]  
ggccccgtagctcagtggttagagcagtcgactcataatcgattggtcgc  
tgggtcaagtcagccagggtcacca

>KJ489398.1 Bacillus phage Evoli, complete genome

1-1tRNA-Asn(gtt)[32278,32352]  
tgtgctttagctcagtcggttagagctgggtggtgtaaccactgtgtcg  
taggttcgagccctacctagcacgt  
1-2tRNA-Gln(ttg)[32358,32430]  
tgctcttagccaagcggtaaggcacgggacttgactctcggacgcgt  
agttcgaatctagcagaggcatc  
1-3tRNA-Trp(cca)[32599,32672]  
gggagtttagtttagtggtaaacctcggtctcctcaaaaccgaagtcatat  
gttcgattcgtagctcctgcca  
1-4tRNA-Ser(tga)[32674,32761]

ggagggtggcagagtggattattgcagcggctctgaaaaccgccgaggg  
taaaacctccgtgagttcaaattcacacctctcca  
1-5tRNA-Asp(gtc)[32763,32836]  
tggggatatagtagaggtaaacacgcacggctgtctaccgtgaagcac  
gggttcgaatcccgttatcctcgt  
1-6tRNA-Leu(tag)[32981,33058]  
tgccgaagtaatccaatcaggtagatagcggtttagaaaccgtccag  
tgtgggttcgacccccctcctcggtatc  
1-7tRNA-Tyr(gta)[33065,33148]  
tggcagaatagtaacggcgaacgacagtgactgtaaatcacccctcat  
tcgagttctcaggttcgagtcctgattctgctat  
1-8tRNA-Ser(gct)[34061,34147]  
ggaggggtactcaagcggcgaagaggggacttgctaagtcctagtagc  
ttaacaggtagcaggggttcgaatccctcccctcct

>KJ535721.1 *Listeria* phage List-36, complete genome

1-1tRNA-Cys(gca)[97557,97627]  
gcgggtataaccaactggaaggtagtagactgcaaattacgtatatgg  
gttcaattcccattaccgct  
1-2tRNA-Ser(gct)[97706,97792]  
ggagagttgtcagagaggcttaatgatacgggttgctaactcgtgtact  
agtaatagtagcaagggttcgaatcccttactctcct  
1-3tRNA-Ile(gat)[97969,98041]  
gccagcatagcttagtaggcaaagcaaccgaccgataatcggtagtcctt  
ggttcaattccaagtgttggtac  
1-4tRNA-Asp(gtc)[98145,98217]  
gtgcgtatgatataatggctattatactcgactgtctatcgagaaatagg  
ggttcgattccccttacgtgcgc  
1-5tRNA-Leu(tag)[98683,98767]  
tgccgagatggtggaactggtatacacggtagacttagaatctgctgtcc  
taaggatatgtgggttcgaatcccactctcggtat  
1-6tRNA-Tyr(gta)[99128,99209]  
gtgccattcgcatagaggcaattgcaggggactgtaactcccctcccttc  
ggggttccaaggttcgagtccttgatggcgca  
1-7tRNA-Thr(tgt)[99292,99363]  
gcttgatatgtcaattggtagaacagtggttttgtaagcctcagacgtg  
ggttcaagtcctactacaagca  
1-8tRNA-Gln(ttg)[99382,99454]  
tggtctgtagccaagcggtaaggcaacggatttgattccgtgatacgtt  
ggttcgaatccaactagaccagc  
1-9tRNA-Trp(cca)[99456,99529]  
taggggtatagtttatctggtaaaaattggttccaactccaatgaggt  
gggttcaagtcctactatccctgt  
1-10tRNA-Lys(ttt)[99654,99725]  
ggagttatggtgaaatggctatcactgcgggttttaccctgtattcta



ggttcgaatcctagtggtcca  
 1-11tRNA-Phe(gaa)[99731,99802]  
 gtagtcctagctgagatggattagcacttgctgaaaagcaagagaggca  
 ggttcgatacctgcggactcca  
 1-12tRNA-Ser(tga)[99815,99906]  
 ggaagggtgtagagcttggaatacgtagcttgaaaactagttgcc  
 ctggaatacagggtacaagggttcaatcccttaccttct  
 1-13tRNA-Asn(gtt)[100528,100601]  
 gtgtccttaactcagaggtcagagtgccgtcctgtaagtcggaagtcgc  
 tgggtcaaatccagcaggatacgc  
 1-14tRNA-Gly(tcc)[100670,100740]  
 gcgggtatagtagtataagggtagtagtaccgaaggttccaacctgtagtgggg  
 gttcgaatccccctaccgct  
 1-15tRNA-Arg(tct)[100987,101057]  
 gtccctatggtgtagtgatgcacaagggttctactcccttagcgcgg  
 gttcgaatcctgctgaggact  
 1-16tRNA-Pro(tgg)[102175,102249]  
 cagggtgtagctcagtttggttagagtacccgcttggagacgggaagtc  
 gtaggttcgagtcctaccacctga  
 1-17tRNA-Met(cat)[103142,103215]  
 ttgtcccgtagctagaagggtcgagcaaggagctcataactcctcggtttg  
 ggttcgattcccaacggggcaatc  
 >KJ535722.1 Listeria phage LMSP-25, complete genome  
 1-1tRNA-Met(cat)c[41701,41774]  
 ttgtcccgtagctagaagggtcgagcaaggagctcataactcctcggtttg  
 ggttcgattcccaacggggcaatc  
 1-2tRNA-Pro(tgg)c[42667,42741]  
 cagggtgtagctcagtttggttagagtacccgcttggagacgggaagtc  
 gtaggttcgaatcctaccacctga  
 1-3tRNA-Arg(tct)c[43859,43929]  
 gtccctatggtgtagtgatgcacaagggttctactcccttagcgcgg  
 gttcgaatcctgctgaggact  
 1-4tRNA-Gly(tcc)c[44176,44246]  
 gcgggtatagtagtataagggtagtagtaccgaaggttccaacctgtagtgggg  
 gttcgaatccccctaccgct  
 1-5tRNA-Asn(gtt)c[44315,44388]  
 gtgtccttaactcagaggtcagagtgccgtcctgtaagtcggaagtcgc  
 tgggtcaaatccagcaggatacgc  
 1-6tRNA-Ser(tga)c[44626,44717]  
 ggaagggtgtagagcttggaatacgtagcttgaaaactagcttacc  
 ctggaatacagggtacaagggttcgaatcccttaccttct  
 1-7tRNA-Phe(gaa)c[44730,44801]  
 gtagtcctagctgagatggattagcgttgcttgaaaagcaagagaggca  
 ggttcgatacctgcggactcca

1-8tRNA-Lys(ttt)c[44807,44878]  
 ggagttatggtgaaatggctatcactgcgggttttaccctgtattcta  
 ggttcgaatcctagtggtcca  
 1-9tRNA-Tyr(gta)c[45202,45283]  
 gtgtcattcgcatagtggaattgcaggggactgtaactccctcccttc  
 ggggttccaaggttcgagtccttgatggcgca  
 1-10tRNA-Leu(tag)c[45644,45728]  
 tgccgagatggtggaactggtatacacggtagacttagaatctgctgtcc  
 caaggatatgtgggttcgaatcccactctcggtat  
 1-11tRNA-Asp(gtc)c[46194,46266]  
 gtgcgtatgatataatggctattatactcgactgtctatcgagaaatagg  
 ggttcgattccccttacgtgcgc  
 1-12tRNA-Ile(gat)c[46370,46442]  
 gccagcatagcttagtaggcaaagcaaccgaccgataatcggtagtcctt  
 ggttcaattccaagtgttggtac  
 1-13tRNA-Ser(gct)c[46619,46705]  
 ggagagttgtcagagaggcttaatgatacgggttgctaactcgtgtact  
 agtaatagtagcaagggttcgaatcccttactctcct  
 1-14tRNA-Cys(gca)c[46785,46855]  
 gcgggtataaccaactggaaaggtagtagactgcaaatctacgtatatgg  
 gttcaattccattaccgct  
 >KC954774.1 Cronobacter phage CR8, complete genome  
 1-1tRNA-Thr(tgt)[144252,144327]  
 gctgattagctcagtaggtagagcgctcacttgaataggatgtcgc  
 ggggtcgattcctgcatccagcacca  
 1-2tRNA-Cys(gca)[144334,144410]  
 gcaacgttcccgagctctggaacggctctcgctgcaaacgagatgagca  
 ctggttcgaatccagtagctgtctcca  
 1-3tRNA-Leu(caa)[144412,144488]  
 gcgcttttggtccaattggttagaggcactacattcaaatgtaggggttc  
 ccagttcgaatctgggaaggcgacca  
 1-4tRNA-Ser(gga)[145194,145288]  
 agtaggatggctgagtggttaaagcagcaccttggaagggtgcggatc  
 gggcaaccctggtcccgaggattcaaatctccctcctactgcca  
 1-5tRNA-Lys(ttt)[145293,145369]  
 ggatcgtagctcaattggttagagcaagggacttttaatcccagggttc  
 ggggttcgagtcctgacggtccacca  
 1-6tRNA-Asn(gtt)[145535,145610]  
 tggctcttcgtataatcggttattacggcgactgtaatccgtttatcc  
 ggggttcgagtcgggaggaccagcca  
 1-7tRNA-Glu(ttc)[145649,145727]  
 gtcctggtagacaaacttggttaaagtcaccaccctttcaagtgagggtt  
 tgagggttcgattcccctctcaggacgcca  
 1-8tRNA-Asp(gtc)[145822,145897]

ggtcctatggtatcagcggtaaataactgcctgtcacgcgagagtcac  
gggttcgaatcccgttaggaccgcca  
1-9tRNA-Ile(gat)[146579,146654]  
tggggattagctcagttggtagagcgctcgaccgataatcgagaggtcac  
tggttcaagtcggtatccccaacca  
1-10tRNA-Pro(tgg)[146725,146801]  
cgggtgatagcgcagcctggtagcgcacatctggtttgggaccagagggtcg  
ctggttcgattccagctacaccgacca  
1-11tRNA-Met(cat)[146808,146882]  
tgcgaggtagttcagcggtagaacaggggttcatacgccctcatgtcggc  
agttcgattctgcccttcgaacca  
1-12tRNA-Leu(tag)[146888,146965]  
gtccagtagcccaattggtagaggcacttgatttaggatcatgtcagtg  
atgagttcgaatctctcctggagtacca  
1-13tRNA-Gly(tcc)[146972,147045]  
gcgggcatggtatagtggttgtgccttagcctccaagctaatagtccg  
gttcgatcccggatgcccgtcca  
1-14tRNA-Gln(ttg)[147086,147161]  
aggggattagtttaattggtaaaacatcgggtttgatcccacatcgtg  
aggttcgaatcctccatcccccgcca  
1-15tRNA-His(gtg)[147244,147319]  
gtggccttaattcagaaggtagaatccccggttgtaaccgggcagtcgt  
gggttcaagtcacacaggtcacccca  
1-16tRNA-Ser(tga)[148000,148092]  
ggaagatagggcgtagtgtacgcacccggattgaaccccgcccgcgtg  
tggcgacccacgggtgatagttcgactctattatcttccgcca  
1-17tRNA-Ser(gct)[148097,148183]  
agaagagtggcgaaatcggtagccgcaccggactgctaataccgggtccc  
tcggggcctgagagttcaagtctctcctcttctgcca  
1-18tRNA-Phe(gaa)[148189,148264]  
ggaactgtagctcagttggtagagcgggtgcctgaagagcagcgcgtcag  
cggttcaaatccgttcagttccacca

>KJ094030.1 *Listeria* phage LP-083-2, complete genome

1-1tRNA-Met(cat)c[31951,32024]  
ttgtcccgtagctagaaggctcgagcaaggagctcataactcctcggtttg  
ggttcgattcccaacggggcaatc  
1-2tRNA-Pro(tgg)c[32917,32991]  
cagggtgtagctcagttggttagagtacccgcttggagacgggaagtc  
gtaggttcgagtcctaccaccttga  
1-3tRNA-Arg(tct)c[34109,34179]  
gtccttatggtgtagtggatgcacaagggttctactcccttagcgcgg  
gttcgaatcctgctgaggact  
1-4tRNA-Gly(tcc)c[34437,34507]  
gcgggtatagtagtataagggtagtagtaccgaaggttccaacctgtagtgggg

gttcgaatccccctaccgct  
 1-5tRNA-Asn(gtt)c[34576,34649]  
 gtgtccttaactcagaggtcagagtgccgtcctgtaagtcggaagtcgc  
 tggttcaatccagcaggatacgc  
 1-6tRNA-Ser(tga)c[35271,35362]  
 ggaagggtgtagagcttggaatacgcctgcttgaactagttgcc  
 cttggaatacagggtacaagggttcaatcccttaccttcct  
 1-7tRNA-Phe(gaa)c[35375,35446]  
 gtagtcctagctgagatggattagcgcttgcttgaagcaagagaggca  
 ggttcgatacctcggactcca  
 1-8tRNA-Lys(ttt)c[35452,35523]  
 ggagttatggtgaaatggctatcactgcgggttttaccctgtattcta  
 ggttcgaatcctagtggtcca  
 1-9tRNA-Trp(cca)c[35648,35721]  
 taggggtatagtttatctggtaaaatattggttccaactccaatgaggt  
 gggttcaagtcctactatccctgt  
 1-10tRNA-Gln(ttg)c[35723,35795]  
 tggctctagccaagcggtgaaggcaacggatttgattccgtgatacgtt  
 ggttcgaatccaactagaccagc  
 1-11tRNA-Thr(tgt)c[35814,35885]  
 gcttgatagttcaattggtagaacagtggtttgtaagcctcagcgtg  
 ggttcaagtcctactacaagca  
 1-12tRNA-Tyr(gta)c[35968,36049]  
 gtgccattcgcatagaggcaattgcaggggactgtaactccccctcccttc  
 ggggttccaaggttcgagtccttgatggcgca  
 1-13tRNA-Leu(tag)c[36410,36494]  
 tgccgagatggtggaactggtatacgcgtagacttagaatctgctgtcc  
 taaggatatgtgggttcgaatcccactctcggtat  
 1-14tRNA-Asp(gtc)c[36960,37032]  
 gtgcgtatgatataatggctattatactcggctgtctatcgagaaatagg  
 ggttcgattccccttacgtgcgc  
 1-15tRNA-Ile(gat)c[37136,37208]  
 gccagcatagcttagtaggcaaagcaaccgaccgataatcggtagtcctt  
 ggttcaattccaagtgttggtac  
 1-16tRNA-Ser(gct)c[37385,37471]  
 ggagagttgtcagagaggcttaatgatacgggttgctaactcgttgact  
 agtaatagtlaccaagggttcgaatcccttactctcct  
 1-17tRNA-Cys(gca)c[37550,37620]  
 gcgggtataaccaactggaaaggtagtagactgcaaatctacgtatatgg  
 gttcaattcccattaccgct

>KJ591604.1 *Listeria* phage LMTA-148, complete genome

1-1tRNA-Met(cat)c[34489,34562]  
 ttgtcccgtagctagaaggtcgagcaaggagctcataactcctcggtttg  
 ggttcgattcccaacggggcaatc

1-2tRNA-Pro(tgg)c[35455,35529]  
cagggtgtagctcagtttggttagagtacccgcttggagacgggaagtc  
gtaggttcgaatcctaccacctga

1-3tRNA-Arg(tct)c[36649,36719]  
gtccttatggtgtagtggaatgcacaaggatttctactcccttagcgcg  
gttcgaatcctgctgaggact

1-4tRNA-Gly(tcc)c[36966,37036]  
gcgggtatagtaggtagtagtaccgaagttccaacatgtagtggg  
gttcgaatccccctaccgct

1-5tRNA-Asn(gtt)c[37105,37178]  
gtgtccttaactcagaggtcagagtccgtcctgtaagtcggaagtcgc  
tggttcaatccagcaggatacgc

1-6tRNA-Leu(tag)c[37717,37801]  
tgccgagatggtggaactggtatacacggtagacttagaatctgctgtcc  
caaggatatgtgggttcgaatcccactctcggtat

1-7tRNA-Asp(gtc)c[38267,38339]  
gtgcgtatgatataatggctattatactcgactgtctatcgagaaatagg  
ggttcgattccccttacgtgcgc

1-8tRNA-Ile(gat)c[38443,38515]  
accagcatagcttaggaggcaaagcaaccgaccgataatcggtagtcctt  
ggttcaattccaagtggtgtac

1-9tRNA-Ser(gct)c[38692,38778]  
ggagagttgtcagagaggcttaatgatacgggttgctaactcgttgact  
agtaatagtagcaagggttcgaatccctactctcct

1-10tRNA-Cys(gca)c[38857,38927]  
gcgggtataaccaactggaaaggtagtagactgcaaatctacgtatatgg  
gttcaattcccattaccgct

>AB981169.1 Ralstonia phage RSY1 DNA, complete genome

1-1tRNA-Pro(cgg)c[18954,19043]  
gccacgggtcggcgggttcagggtgcgcgtccggcccgcgggcgcgcg  
cccacggggcggcagggtggtgaggccaccggtgcgcac

>KJ888149.1 Staphylococcus phage MCE-2014, complete genome

1-1tRNA-Met(cat)c[16397,16468]  
ggactcttagcttaaaggtaaagccaaccgctcataacggttgactgta  
ggttcgaatcctacagagtcca

1-2tRNA-Trp(cca)c[38715,38786]  
acacccttagtataattagtagtacaagggtctccaaaacccttagtctt  
tgtgcaaatcaaagagggtgtg

1-3tRNA-Phe(gaa)c[38793,38865]  
ggtttcttagctcagatggtagagcactagattgaagctctaggtgtcat  
tggttcaaatccaatagaaacca

1-4tRNA-Asp(gtc)c[38871,38946]  
ttggtcattggtgtaactggttaacacactgccctgtcacggcagagagt  
acgagttcgagctcgtatgggtcgt

>KC012913.1 Staphylococcus phage Team1, complete genome

1-1tRNA-Met(cat)c[14737,14808]  
ggactcttagcttaaaggtaaagccaaccgctcataacggtttgactgta  
ggttcgaatcctgcagagtcca  
1-2tRNA-Trp(cca)c[37954,38025]  
acacccttagtataattagtagtacaagggtctccaaaacccttagtctt  
tgtgcaaatcaaagagggtgtg  
1-3tRNA-Phe(gaa)c[38032,38104]  
ggtttcttagctcagatggtagagcactagattgaagctctaggtgtcat  
tggttcaaatccaatagaaacca  
1-4tRNA-Asp(gtc)c[38110,38185]  
tggctcattggtgtaactggttaacacactgccctgtcacggcagagagt  
acgagttcgagtctcgtatgggtcgt

>KJ716335.1 Dickeya phage RC-2014, complete genome

1-1tRNA-Met(cat)[108684,108760]  
gatggtgtagttcagttggttagaacgtgcgactcataatcgctttgtca  
ctggttcaagtcctgccgccatcgcca

>JX128257.1 Escherichia phage ECML-4, complete genome

1-1tRNA-Ile(gat)c[75600,75675]  
tgcttcatagctcagtaggtagagcgttcccctgataaggagaggtcac  
tggttcgaatccagttgaagcaacca  
1-2tRNA-Ser(gct)c[75679,75767]  
ggaagggtgcccagaggtttaagggactcgactgctaatcgagtggggc  
tttagccccgaagggtcgaatccttcaccttcgccca  
1-3tRNA-Tyr(gta)c[76053,76136]  
gtgagtggtgcagagcggtcgaatgcaggagactgtaaatctccccgtaa  
cagcgcgggtggttcgaatccatccactcacacca  
1-4tRNA-Asn(gtt)c[76393,76468]  
gacgatgtagttcagtcggtagaacggtggactgttaatccatatgtcgc  
aggttcaagtcctgccatcgtcgcca  
1-5tRNA-Met(cat)c[76788,76863]  
ggccccgtagctcagtggttagagcagtcgactcataatcgattggtcgc  
tggttcaagtcagccagggtcacca

>KJ473422.1 Acinetobacter phage vB\_AbaM\_Acibel004, complete genome

1-1tRNA-Ser(tga)[59973,60061]  
ggtagatagcgtcaagtgacaaagtggattgaaatccatgctattggt  
tagtagccgataagggttcgattcctttatctacctcca  
1-2tRNA-Tyr(gta)[60064,60151]  
gggagttagacgactgttggttggtcgtagcagactgtaaatctgccctc  
acaaagcatcattggttcgattccaatagctcccacca  
1-3tRNA-Ser(gct)[60159,60247]  
agagaataaatagcttaggtagtagactccctgctaaggagatcgactg  
attaaatcggtttcgttcgagtacgatgttctctgccca  
1-4tRNA-Arg(tct)[60663,60738]

acgtcattggtcgagcggattagcatcacacttctaattgacttacag  
gggttcgaatcctctatggcgtacca  
1-5tRNA-Phe(gaa)[60826,60900]  
gggttggttaactcagtggttagtgactgtctgaagaacagtaggtcgt  
agttcgattcttaccctcccacca  
1-6tRNA-Met(cat)[61018,61092]  
agcggatagtgtaataggtagcacgaaaggctcataaccttttagttcg  
ggttcgattcccgcataccgcaacca  
1-7tRNA-Ile(gat)[61099,61174]  
ggtcgattagctcagttggttagcagtagcccgcataagctattggtcgc  
tggttcaaatccagcatcgactacca  
1-8tRNA-Asn(gtt)[61181,61266]  
tcttgttagacaaactggtaaagtcagtggtgactgttaatccaccgctta  
attgcactgtaggttcgaagcctaccacaagagcca  
1-9tRNA-Pro(tgg)[61273,61349]  
cagggtatagggcagtcggtagcctatttctttggaaagaaaatgtcg  
atggttcaaatccatctaccttgacca  
1-10tRNA-Gln(ttg)[61562,61637]  
tcattggaagtatttacaggagatgcactatcggttggcggttaggttaa  
gttggttcgaatccaaccccatgacc  
1-11tRNA-Asp(gtc)[61689,61764]  
ggctctgtagcatagcggattatgcgcctccctgtctaggagaaaaacga  
gggttcgagtccttcagagtcgcca  
1-12tRNA-Thr(tgt)[61994,62067]  
gctggtatcgtataatggtattacgcttgtttgtaatacaagtcattgcca  
gttcgattctgtctaccagcacca  
1-13tRNA-Trp(cca)[62400,62470]  
aggctgtagtgtaaagggtgcacagtggttccaaatcctcttgatgg  
gttcgattcctatacgattct  
1-14tRNA-Gln(ttg)[62534,62607]  
tgtcgtatggtgtaattggttagcacctcagaattgactctgatagcgaag  
gttcgatcccttctacgactcca  
1-15tRNA-His(gtg)[62610,62684]  
gtagtcttaggttatatggtaaaccacaggtgtgaccctgaaaaacat  
ggttcgagtcctatgagattgcacca  
1-16tRNA-Lys(ttt)[62687,62763]  
tgatcggaagctaaagtggaggaagcactggacttttaatccagataaag  
agggttcaactccctcccgatcaacca  
1-17tRNA-Gly(tcc)[63016,63090]  
gcgtgtgtcgtatagtggaattataggtggctccaaccatcgacgag  
ggttcgattccctccacccgcacca  
1-18tRNA-Glu(ctc)[63097,63172]  
gttctcatcgtctaactggtcaggatgccacactctcaatgtggtgattt  
gggttcgatcccaatgagaataacca

1-19tRNA-Glu(ttc)[63179,63253]  
gctctattcgtctaattggctaggatttctcccttcaaggagaagaagag  
ggatcgaaaccctcatagagtacca

1-20tRNA-Leu(tag)[63499,63575]  
gctcaggtaagagaattggcatatcgacagctcttagaaactgtgattg  
tgggttcgagtcaccctgagtacca

1-21tRNA-Leu(taa)[63582,63658]  
gatcgggtaggctaactggcaaagctgacagacttaaaatctgtgttg  
tgggttcgactcccaccccgattacca

>KJ018209.1 Shewanella sp. phage 1/4, complete genome

1-1tRNA-Gly(tcc)[42049,42124]  
gcgtaattagctcagatggtagagcgctatcctccaagttagtggtcat  
cggttcgaatccgatattacgtcca

1-2tRNA-Arg(tct)[42192,42268]  
atctcgtagctcagttggatagagcaacagccttctaagctgtgggtcg  
aaagttcgaatcttcacgggatacca

>JX128259.1 Escherichia phage ECML-134, complete genome

1-1tRNA-Arg(tct)c[68419,68494]  
cgaggcatagctcagaaggaagagcaaggaccttctaagtcctgggtcgt  
aggttcgatccctactgcctcgacca

1-2tRNA-Asn(gtt)c[68499,68573]  
ggatgtgtagctcaatggcagagcgatcgctgtaagcgattggtata  
ggttcgaatcctatcacgtccgcca

1-3tRNA-Tyr(gta)c[68578,68664]  
ggggagtatcccgtagaggtagcgggtggactgtaaatccattgtcat  
tgcgactcgggtggttcgactccaccactccccacca

1-4tRNA-Met(cat)c[68674,68748]  
ggccctgtagctggaaggtcaagcaagcgactcataatcgccagatggt  
ggttcaattccaccaggccacca

1-5tRNA-Thr(tgt)c[68750,68825]  
gctgatttagctcagtaggtagagcaactcacttgtaatgagaaggtcgg  
cggttcgattccgtcaatcagcacca

1-6tRNA-Ser(tga)c[68831,68920]  
ggaggcgtggcagagtggtttaatgcaccggtcttgaaaaccggaagtcg  
ctccggcgactcataggttcaaatcctatcgctccgcca

1-7tRNA-Gly(tcc)c[69582,69655]  
gcggatatcgtataatggattacctcagactccaatctgatgatga  
gttcgattctcattatccgtcca

1-8tRNA-Leu(taa)c[69661,69747]  
gcgagaatggtaaattggtaaaggcacagcacttaaaatgctcggaat  
gatttccttgtgggttcgagtccttctcgcacca

1-9tRNA-Gln(ttg)c[69748,69821]  
tgggaattagccaagttggaaggcactggattttgattccaggatgcaa  
aggttcgagtcctttattccagc



>KM407600.1 Shigella phage Shf125875, complete genome  
1-tRNA-Arg(tct)c[74227,74303]  
cgaggcatagctcaattgtatagagaacggacttctaataccgtaggttg  
aaggttagaatccttctgtctcgacca  
1-2tRNA-Met(cat)c[74307,74381]  
ggccctgtagctcaatgggagagctgtcagctcataactgataggtagct  
ggatcgaaaccagccagggtcacca

>KF562341.1 Escherichia phage vB\_EcoM\_PhAPEC2, complete genome  
1-tRNA-Arg(tct)c[74040,74115]  
cgaggcatagctcagaaggaagagcaaggaccttaagtcctaggtcgt  
aggttcgatccctactgtctcgacca  
1-2tRNA-Asn(gtt)c[74120,74194]  
ggatgtgtagctcagtggttagagcagttgactgttaataatggcccat  
ggttcgaatccatgcacgtccgcca  
1-3tRNA-Met(cat)c[74199,74273]  
ggccctgtagctcaatgggagagctgtcagctcataactgataggtagct  
ggatcgaaaccagccagggccacca

>KF554508.2 Bacillus phage CP-51, complete genome  
1-tRNA-Met(cat)[98,171]  
ggttccttagctcaattggttagagctaccggctcataaccggtgggttg  
taggttcgagtcctacaggaatca  
1-3tRNA-Trp(cca)[1433,1506]  
tgggggtatagtttaacaggtaaaacagtggtctccaaaccaccgtcct  
aggttcgaatcctagtaccctcgt

>KM216423.1 Staphylococcus phage P108, complete genome  
1-tRNA-Met(cat)c[94979,95050]  
ggactcttagcttaaaggtaaagccaaccgctcataacggttgactgta  
ggttcgaatcctacagagtcca  
1-2tRNA-Phe(gaa)c[116672,116744]  
ggtttcttagctcagatggtagagcactagattgaagctctaggtgtcat  
tggttcaatccaatagaaacca  
1-3tRNA-Asp(gtc)c[116750,116825]  
tggctcattggtgtaactggttaacacactgccctgtcacggcagagagt  
acgagttcgagtcctgtatgagtcgt

>KM373208.1 Listeria phage WIL-1, complete genome  
1-tRNA-Cys(gca)[550,620]  
cggggtataaccaactggaaggtagtagactgcaaatctacgtatatgg  
gttcaattccattaccgct  
1-2tRNA-Ser(gct)[699,785]  
ggagagttgtcagagaggcttaatgatacgggttgctaactcgttgact  
agtaatagtaccaagggttcgaatcccttactctcct  
1-3tRNA-Ile(gat)[962,1034]  
gccagcatagcttagtaggcaaagcaaccgaccgataatcggtagtcctt  
ggttcaattccaagtgttggtac

1-4tRNA-Asp(gtc)[1138,1210]  
 gtgcgtatgatataatggctattatactcggctgtctatcgagaaatagg  
 ggttcgattccccttacgtgcgc  
 1-5tRNA-Leu(tag)[1676,1760]  
 tgccgagatggtggaactggtatacacggtagacttagaatctgctgtcc  
 taaggatagtgggttcgaatcccactctcggat  
 1-6tRNA-Tyr(gta)[2121,2202]  
 gtgccattcgcatagaggcaattgcaggggactgtaactcccctcccttc  
 ggggtccaaggttcgagtccttgatggcgca  
 1-7tRNA-Thr(tgt)[2285,2356]  
 gcttgatatgtcaattggtagaacagtggtttgaagcctcagacgtg  
 ggttcaagtcctactacaagca  
 1-8tRNA-Gln(ttg)[2375,2447]  
 ttgctctgtagccaagcggtaaggcaacggatttgattccgtgatacgtt  
 ggttcgaatccaactagaccagc  
 1-9tRNA-Trp(cca)[2449,2522]  
 taggggtatagtttatctggtaaaaattggttccaactccaatgaggt  
 ggggtcaagtcctactatccctgt  
 1-10tRNA-Lys(ttt)[2647,2718]  
 ggagttatggtgaaatggctatcactgcgggttttaccgccgtattcta  
 ggttcgaatcctagtggtcca  
 1-11tRNA-Phe(gaa)[2724,2795]  
 gtagtctagctgagatggattagcgttgctgaaaagcaagagaggca  
 ggttcgatacctgcggactcca  
 1-12tRNA-Ser(tga)[2808,2899]  
 ggaaggttggtagagcttggtatacgtagcttgaaaactagtttgcc  
 ctggaatacagggtacaagggttcaaatcccttaccttct  
 1-13tRNA-Asn(gtt)[3521,3594]  
 gtgtccttaactcagaggtcagagtgccgtcctgttaagtcggaagtcgc  
 tgggtcaaatccagcaggatacgc  
 1-14tRNA-Gly(tcc)[3663,3733]  
 gcgggtatagtagtataagggtagtagccaaggtttccaacctgtagtgggg  
 gttcgaatcccctaccgct  
 1-15tRNA-Arg(tct)[3991,4061]  
 gtccctatggtgtagtggatgcacaagggttctactcccttagcgcgg  
 gttcgaatcctgctgaggact  
 1-16tRNA-Pro(tgg)[5179,5253]  
 cagggtgtagctcagtttggttagagtacccgcttggagacgggaagtc  
 gtaggttcgaatcctaccacctga  
 1-17tRNA-Met(cat)[6146,6219]  
 ttgtcccgtagctagaaggctcgagcaaggagctcataactcctcggtttg  
 ggttcgattccaacggggcaatc  
 >KM507819.1 Escherichia phage 121Q, complete genome  
 1-1tRNA-Gly(tcc)[72682,72754]

gcaggtaaagtgttgatggcggcatacagtacttccgattctgggggtgg  
ggttcaaatacccatcctgctc  
1-2tRNA-Ser(tga)[73491,73580]  
ggatgaagtggcagagtgggttaatgcaacggcttgaaaaccgtcgaggg  
tgaaagtctcctcgtgagttcaaattcaccttcaccgcca  
1-3tRNA-Ser(act)[75464,75555]  
ggaagggtggcagagcggttgattgcactcgcctactaagcgagcaagtg  
ttagaaataacgcttcgtgggttcaaattccacctctttcgc  
1-4tRNA-Met(cat)[75563,75637]  
gggcctgtagctcagtggttagagcggctggctcataaccgattggtcgca  
ggatcgttccctgccaggcccacca  
1-5tRNA-Asn(gtt)[75728,75802]  
ggttcgttggcctattggtgggcagcaactgttaattgccttagact  
agttcaattctagtagcaaccgcca  
1-6tRNA-Thr(tgt)[77896,77969]  
gccgacttagctcagtaggttagagcgttcctctgtaagggaatgtcac  
cagttcaattccggtagtcggcac

>KF301602.1 Caulobacter phage Cr30, complete genome

1-1tRNA-Arg(tct)[81958,82034]  
ggtcgcatagctcaactggagagagcacaagccttctaagcttgggggtg  
taggttcgagtcctactcgcgatcgcca  
1-2tRNA-Asn(gtt)c[143895,143970]  
tgaatagtagctcagttggttagagcgcctgactgttactcagaatgtcac  
aggttcgagtcctgtctattcagcca  
1-3tRNA-Gly(tcc)c[143974,144050]  
gcatctatggatattggctagcacatctggttccaccagaaggatt  
cggttcgagctccgaatagatgtcca  
1-4tRNA-Met(cat)c[151271,151345]  
ggaccagtagctcattggtgaagaactggctgctcataacagtctggtgat  
tgttcgattcaatcctggctacca  
1-5tRNA-Pro(tgg)c[153143,153219]  
ctctcagtagctcaattggttagagtacgggcttgggagctcgggggttc  
ctcgttcgagtcgaggctgggagacca

>KJ018211.1 Shewanella sp. phage 1/40, complete genome

1-1tRNA-Gly(tcc)[42797,42872]  
gcgtaattagctcagatggtagagcgcctatcctccaagttagtggtcat  
cggttcgaatccgatattacgtcca  
1-2tRNA-Arg(tct)[42940,43016]  
atctcgtagctcagttggatagagcaacagccttctaagctgtgggtcg  
aaagttcgaatctttcacgggatacca

>KM190144.1 Escherichia phage Av-05, complete genome

1-1tRNA-Phe(gaa)c[4068,4143]  
gtgacggtaactcagttggttagagtccttgctgaagactagtggtcac  
aggttcgaatcctgtccgtcacacca

1-2tRNA-Leu(tag)c[4149,4225]

gggcgattgatggaattggtatacatgtcaggcttagaacctgaatttg  
ggggttcgagtcctcatcgctacca

1-3tRNA-Pro(tgg)c[4474,4551]

ctgtccgtagcgcagcttgggtagcgcgggtcacttgggatgatcaggtc  
gttggttcaaatccaaccggacagacca

1-4tRNA-Asn(gtt)c[4636,4726]

ggttctttgaccgagtggtcgtggtgacggcctgtaagccgttgggag  
gaatctccccaccgaaggttcgaatccttcaggaaccgcca

1-5tRNA-Lys(ttt)c[4736,4812]

ggatctgtagccaaatggtttaaggcacttgacttttaatcgaggattg  
ttagttcgaatctaaccagatccacca

1-6tRNA-Ser(tga)c[5035,5123]

ggaggctggggtgcatggtgcacaagctggttgaaccagctccgctgt  
agagatatggtgacagttcgattctgtcagcctcctcca

1-7tRNA-Ser(gct)c[5202,5295]

ggaagattaaccctaatttgtaagggtctccctgctaaggagatagta  
accagaaatgggtgtgccagtcaagctggcatcttctcca

1-8tRNA-Ser(gga)c[5317,5406]

ggagaagcaaatcgattggcgacgaaaccacattggaaatgtctgactg  
gtaaaacggcttgagagttcgattctctccttccacca

1-9tRNA-Gln(ttg)c[5416,5491]

aggggattagcatagtgccctaatagcacgggcttgaccccgtagcgg  
ttgttcgaatcaaccatcccctgcca

1-10tRNA-Gly(tcc)c[6493,6567]

gcatccatagttaattgggaaaactacagcctccaagctgaagtcgag  
ggttcgataccctctggatgctcca

1-11tRNA-Tyr(gta)c[6717,6806]

gtgtcgtagaccgtagggtagcgggggagactgtaaatctcctgtctc  
gaaagggactcgggtagttcgactctatcacggcacacca

1-12tRNA-Cys(gca)c[7241,7317]

gcacggtgccggaatttggttacggatctgtctgaaaacggatatatg  
tcggttcaagtcgacaccgtgctcca

1-13tRNA-Thr(tgt)c[7779,7853]

gctcgtatagctcaacggtagagcacctgcctgttaagcaggggttgca  
ggttcgaaacctgctgcgagcacca

1-14tRNA-Met(cat)c[9584,9659]

ggccccttagctcagtggttagagcaggtgactcataatcgcttggtcgc  
tggttcaagtccagcaggggccacca

>KJ858521.1 Aeromonas phage pAh6-C, complete genome

1-1tRNA-Pro(cgg)[30212,30283]

ctgggatgggctaagtaagccatgcgcacgggtgcgttaggatctaggt  
acaaatcctaggccccagacca

1-2tRNA-Thr(tgt)[30285,30360]

```

gccagtttagcttagttggaagagcaaccgatttgaatcggtaggtcgt
aggttcgagccctacaactggcacca
>KM501444.1 Shigella phage pSs-1, complete genome
1-1tRNA-Arg(tct)c[73554,73629]
cgaggcatagctcagaaggaagagcaaggaccttctaagtcctaggtcgt
aggttcgalccctactgcctcgacca
1-2tRNA-Asn(gtt)c[73634,73708]
ggatgtgtagctcaatggcagagcgatcgctgttaagcgattggtata
ggttcgaatcctatcacgtccgcca
1-3tRNA-Tyr(gta)c[73713,73799]
ggggagtatcccgtagaggtagcgggtggactgtaaatccattgtcat
tgcgactcgggtggttcgactccatcactcccacca
1-4tRNA-Met(cat)c[73809,73883]
ggccctgtagctggaaggttcaagcaagcgactcataatgccagatggt
ggttcaattccaccagggccacca
1-5tRNA-Thr(tgt)c[73885,73960]
gctgatttagctcagtaggtagagcaactcacttgaatgagaaggtcgg
cggttcgaltccgtcaatcagcacca
1-6tRNA-Ser(tga)c[73966,74055]
ggaggcgtggcagagtgtttaatgcaccggtcttgaaaaccggcagtcg
ctccggcgactcataggttcaaatcctatcgctccgcca
1-7tRNA-Pro(tgg)c[74057,74131]
ctccgtgtagctcagtttgtagagcgctgattgggatcaggagggtcc
aaggttcaaatccttgtatggagac
1-8tRNA-Gly(tcc)c[74142,74215]
gcggatatcgataatggcattacctcagactccaatctgatgatgtga
gttcgattctcattatccgtcca
1-9tRNA-Leu(taa)c[74221,74307]
gcgagaatggtaaattggtaaaggcacagcacttaaatgctgcggaat
gatttccttgggttcgagtccttctcgcacca
1-10tRNA-Gln(ttg)c[74308,74381]
tgggaattagccaagttgtaaggcactggatttgattccaggatgcaa
aggttcgagtcctttattcccagc
>AP014629.1 Edwardsiella phage GF-2 DNA, complete sequence
1-1tRNA-Asn(gtt)[39837,39912]
ggtggggaagcacatacggatgtcggcaggctgttaacctgatggtata
gggttcgagtcctaaccaccgcca
1-2tRNA-Thr(tgt)[39914,39988]
gccggaatagttcagtggcagaacggatgccttgaagcatcgcgtcaga
ggttcgattcctttctcgcacca
>KJ000058.2 Salmonella phage STP4-a, complete genome
1-1tRNA-Arg(tct)c[61904,61980]
cgaggcatagctcaatagtagagcaacggcttctaaaccgtaggttg
aaggttagaatccttctgtctcgacca

```

1-2tRNA-Asn(gtt)c[61987,62058]  
tggatcatcgataaaggttattacgggagctgtaactccttatctt  
ggttcgagccaagtgcgccag  
1-3tRNA-Gln(ttg)c[62367,62442]  
tgggaattagccaagttggaaggcaccgattttgattccgggatgcac  
tggttcgagcccagattcccagcca  
1-4tRNA-Met(cat)c[62449,62524]  
ggccccttagctcagtggttagagcaggcgactcataatcgcttggtcgc  
tggttcaagtcagcaggggccacca

>LN610573.1 *Pseudomonas* phage vB\_PaeM\_PA01\_Ab03, complete genome

1-1tRNA-Asn(gtt)[25015,25091]  
tccgttcggtccctcaaggcgaggagcttgactgttaatacaagacgtgc  
ctggatcgattccaggagcggagcca  
1-2tRNA-Tyr(gta)[25149,25236]  
ggaggggtggcagagcggtttaatgcaccggcctgtaaatccggcgtccg  
accgagcatcgctggttcaaatccagccccctccacca  
1-3tRNA-Gln(ttg)[25438,25513]  
aggcgtgtggcgaagggttaacgcactggactttgactccagcattcga  
gggttcgaatccctccacgtctgcca

>KJ019069.1 *Synechococcus* phage ACG-2014j isolate Syn7803US103, complete genome

1-1tRNA-Met(cat)[17049,17124]  
tgcttccttagcaatctggtgaatgcagcaaaactcataattgcctaagg  
agagttcgatcctctcaggaagcatc  
1-2tRNA-Leu(taa)[17125,17211]  
tgcgagtatggcggaatcggtagacgcaccagacttaaaatctgttgagc  
attatgctcgtgggagttcaagtctccctactcgcat  
1-3tRNA-Thr(tgt)[18029,18101]  
gccaaactagctcagtggttagagcaggcctttgtaaagctcaggtcgca  
ggttcaaatcctgtgttggtc  
1-4tRNA-Asn(gtt)[18106,18177]  
tcctcttagctcagcggtagagcgggtgactgttaatacaattgtccct  
ggttcgatcccaggaaggggag  
1-5tRNA-Arg(tct)[158077,158153]  
gactcagtagctcagttggatagagcaactgccttctaagcagtcggtcg  
ttggttcgagccaacctgagtcgcca  
1-6tRNA-Leu(tag)[158154,158236]  
gtcggatggcggaattggtagacgcgccagggttaggttctggtgtctt  
atgacgtggaggttcaagtcctcttaccgacac  
1-7tRNA-Val(tac)[158239,158310]  
gctcgaatagctcagaggtagacacctcctttacacggagattgtcggg  
ggttcgatcccctcttcgagca  
1-8tRNA-Gly(tcc)[161447,161518]  
gcgggtgtagctcagtggttagagcgtcagtttccaaactgaatgtcgtc  
ggttcaagtcgatctcccgt

>KJ019156.1 Synechococcus phage ACG-2014e isolate Syn7803C2, complete genome

1-1tRNA-Met(cat)[17776,17848]  
gcttccttagcaatctggtgaatgcagcaaaactcataattgcctaagga  
gagttcgatcctctcaggaagca  
1-2tRNA-Leu(taa)[17851,17937]  
tgcgagtggtggcgaatcggtagacgcaccagactaaaaatctgttgagc  
attatgctcgtgggagttcaagtcctcctactcgcat  
1-3tRNA-Asp(gtc)[18754,18829]  
tggggttagctcagttggttagagcgctgtcacgcaggaagtc  
gtgggtcaagtcctcatcaatccgt  
1-4tRNA-Thr(tgt)[18832,18904]  
gccaaactagctcagtggttagagcagggtttgtaaagctcaggtcgca  
ggttcaaatcctgtgtttggctc  
1-5tRNA-Asn(gtt)[18909,18980]  
tcctccttagctcagcggttagagcggtgactgttaataatgttcct  
ggttcgatcccaggagggggag  
1-6tRNA-Arg(tct)[154258,154334]  
gactcagtagctcagttggatagagcaactgccttctaagcagtcggtcg  
ttggttcgagtcacactgagtcgcca  
1-7tRNA-Leu(tag)[154335,154417]  
gtcggtagtggcgaattggtagacgcgcaggtttaggttctggtgtctt  
atgacgtggaggttcaagtcctcttaccgacac  
1-8tRNA-Val(tac)[154420,154491]  
gctcgaatagctcagaggtagagcacctcctttacacggagattgtcggg  
ggttcgatcccctcttcgagca  
1-9tRNA-Gly(tcc)[156950,157021]  
gcgggtgtagctcagtggttagagcgtcagtttccaaactgaatgtcgtc  
ggttcaagtcgatctcccgt

>KJ019071.1 Synechococcus phage ACG-2014g isolate Syn7803US105, complete genome

1-1tRNA-Val(tac)[13160,13233]  
tgggcgaataactcagcggtagagtgtctcctttacacggaggttcgga  
gggttcgatcccctcttcgccc  
1-2tRNA-Leu(taa)[18087,18173]  
tgggagtggtggcgaatcggtagacgcaccagactaaaaatctgttgagc  
aatatgctcgtgagagttcaagtcctctactcctat  
1-3tRNA-Thr(tgt)[18387,18459]  
gcctccgtagctcagtggttagagcagggtttgtaaagctcaggtcgca  
agttcaaatctgtcagaggctc  
1-4tRNA-Asn(gtt)[18463,18536]  
ttcctccttagctcagcggttagagcggtgactgttaataatgttccc  
tgggttcgatcccaggagggggagt  
1-5tRNA-Arg(tct)[157432,157507]  
tgggtcagtagctcagatggatagagcaactgccttctaagcagtcggtc  
gcaggttcgagtcctgcctgacccgt

>KJ019136.1 Synechococcus phage ACG-2014d isolate Syn7803C102, complete genome

1-tRNA-Val(tac)[13624,13697]

tgggtgattaactcagtggttagagtgactgtttacacgcagtaggtcac

tggttcaaatccagttatcccat

1-2tRNA-Arg(tct)[153716,153790]

tgggcaagtagctcagtggttagagcatcgcaattctaatacggttggtcg

ggggttcaaatccctccttgcccgt

1-3tRNA-Asn(gtt)[153811,153884]

ttcccaagtagctcagtggcagagccgccgactgttaatcggctggtcgc

tggttcaaatccagccttgggagt

>KJ019059.1 Synechococcus phage ACG-2014f isolate Syn7803C90, complete genome

1-tRNA-Arg(tct)[132746,132819]

gggtcagtagctcagatggatagagcaattcacttctaataattggtcg

ggggttcgagtcctcctgacccg

1-2tRNA-Asn(gtt)[133033,133104]

tcacaaatagctcagcggtagagtcggcgactgttaatcgcttgcctt

ggttcgaatccagttgtggag

>KM236237.1 Citrobacter phage Miller, complete genome

1-tRNA-Met(cat)[49270,49346]

ggcccttttagctcaattggttagagcgaacccctcataagggtgtggttc

cgggtcgagtcacgaaggggccacca

>KP797973.1 Salmonella phage Det7, complete genome

1-tRNA-Ser(gct)c[132125,132213]

ggaaggttggccgagaggtttaagggactcgactgtaatcgagtggggc

tttagcccccgaaggttcgaatccttcacctccgcca

1-2tRNA-Tyr(gta)c[132486,132569]

gtgagtgtggcagagcggtcgaatgcaggagactgtaaatctccccgtaa

cagcgcgggtggttcgaatccatccactcacacca

1-3tRNA-Asn(gtt)c[132827,132902]

gacgatgtagttcagtcggtagaacggcggtctgttaaaccgtatgtcgc

aggttcaagtcctgccatcgtcgcca

1-4tRNA-Met(cat)c[133074,133150]

ggctcgttagctcagtcggtagagcagtgaaactcataattcattggtca

ttggttcaaaccatcaggatcacca

>KJ019134.1 Synechococcus phage ACG-2014b isolate Syn7803C100, complete genome

1-tRNA-Thr(tgt)[13153,13225]

gcctccgtagctcagtggttagagcagggtttgtaaagctcaggtcgca

agttcaaatctgtcagaggctc

1-2tRNA-Asn(gtt)[13230,13302]

tcctctatagctcagttggttagagcaggtgactgttaatcacctgtccc

tggttcgagtcagggtggaggag

1-3tRNA-Val(tac)[13305,13376]

ggggaataactcagcggtagagtcctcctttacacggagattgtcggg

ggttcgatcccctcttcgcca



1-4tRNA-Leu(taa)[18740,18826]  
tgggagtggtgcggaatcggtagacgcaccagacttaaaatctgttgaga  
attaatctcgtgggggtcaagtcctccctcctat  
1-5tRNA-Arg(tct)[155502,155576]  
tgggtcagtagctcagcggatagacatcgacttctaatacggtgtcgcg  
caggttcgatccctgcctgacccgt

>KJ019082.1 Synechococcus phage ACG-2014i isolate Syn7803US120, complete genome

1-1tRNA-Met(cat)[17929,18001]  
gttccttagcaatctggtgaatgcagcaaaactcataattgcctaaggt  
gagttcgatcctcacaggaagca  
1-2tRNA-Leu(taa)[18005,18088]  
gcgagtatggcggaatcggtagacgcaccagacttaaaatctgttgagag  
caatctcgtgggagttcaagtcctcctactcgca  
1-3tRNA-Asp(gtc)[18907,18982]  
tggggttagctcagttggttagagcgctgcctgtcacgcaggaagtc  
gtgggttcaagtcctcaatcccgct  
1-4tRNA-Thr(tgt)[18985,19057]  
gcctccgtagctcagtggttagagcagggctttgttaaagctcaggtcgca  
agttcaaatctgtcagaggctc  
1-5tRNA-Asn(gtt)[19062,19133]  
tcctccttagctcagcggtagagcgggtgactgtaataatgtccct  
ggttcgatcccaggggggag  
1-6tRNA-Arg(tct)[153173,153249]  
gggtcagtagctcagatggatagagcaattcacttctaataatggtcgcg  
ggggttcgagtcctcctgacccgcca  
1-7tRNA-Leu(tag)[153250,153333]  
gtcggtagtgcggaattggtagacgcgccaggttaggttctggtgtctt  
tatgacgtggaggttcaagtcctcttaccgacac  
1-8tRNA-Val(tac)[153336,153407]  
gctcgaatagctcagaggtagagcagcactttacacggtgaatgtcggg  
ggttcgatcccctcttcagca  
1-9tRNA-Gly(tcc)[155856,155927]  
gcgggttagctcagtggttagagcgtcagtttccaaactgaatgtcgtc  
ggttcaagtcgatctcccgct

>KF381361.1 Sinorhizobium phage phiM12, complete genome

1-1tRNA-Thr(tgt)c[81122,81205]  
gccggtatagccaagcggcgaaggcacctgattgtaatcaggtattca  
aacgtcggcagttcgaatctgtctaccggctcca  
1-2tRNA-Gln(ttg)c[81206,81279]  
ttgcccttagttcagttggtagaacgtcgaattttggttcgaaggtccg  
tggttcgaatccacgagggaagc  
1-3tRNA-His(gtg)[86152,86228]  
tcatggatggtgttagtctggttagcacgcggatgtggaccgcaagca  
taggttcaaatcctattccatggacca

1-4tRNA-Leu(caa)[94993,95080]  
tgggagataaaggaaactfaccagttcaattctggtttctccaagagtaa  
tcgagtggttaggttcgagtcctacctccccagcca  
1-5tRNA-Met(cat)[95631,95707]  
tgcgggtagtagcagtggttagctcgtctgcctcataagcagaaggtca  
tcagttcgaatctgatccccgcaacca  
1-6tRNA-Cys(gca)[96394,96468]  
gacgagaaggcagaagggttatgcgcggcgttgcaaccgccgtatgtgc  
ggttcaagtcggctctcgtctcca  
1-7tRNA-Lys(ttt)[101026,101102]  
gcgcgcttaactcagttggttagagtggcgacctttaagtcgtttgtcc  
ccggttcgagtcgggagcgcgcacca

>KJ801817.1 Enterococcus phage ECP3, complete genome

1-1tRNA-Asp(gtc)[100086,100161]  
tggcagtataggcagaggtgtcccaacacgtgtcagcgtggaacaca  
cgggttcgagtccttactgtcgtc  
1-2tRNA-Trp(cca)[100412,100485]  
tagtcggttagtgaactggaacacgttggtctccaaaaccaataatag  
gggttcaaatcctctaccgattgt  
1-3tRNA-Arg(tct)[100969,101044]  
tgtaggttagctcaatcgatagagcatccgccttctaagcggacggtt  
gggggttcgattccctccatctacgt  
1-5tRNA-Leu(tag)[101766,101850]  
gcagaagtgatggaactgtagacaacggtgtcttagaaacatcggctcg  
taatggacgtgtgggttcgactccgccttctgca  
1-6tRNA-Met(cat)[102473,102546]  
ggacgttagctcagttggtcagagcattcggtcctaaccgaacggtcg  
caggttcgagacctgcaatgtcca

>KC295538.1 Escherichia phage PBECO 4, complete genome

1-1tRNA-Thr(tgt)c[207837,207910]  
gccgacttagctcagtaggtagagcaatccccttgaagggaaggtcac  
cagttcgattccggtagtcggcac  
1-2tRNA-Asn(gtt)c[208949,209021]  
gactctgtagttcagcggtagaacgtcaaactgttaatttggtgtcggg  
ggttcgaatccctccagagtcgc  
1-3tRNA-Met(cat)c[209026,209104]  
ggccattagctcacgcgtggttagagcaaacgactcataatcgttcggt  
acggtgttcgactaccgatggcccacca  
1-4tRNA-Ser(gct)c[209109,209198]  
agtgagttggatgagtggttgaaatcactaccctgctaaggtagcatatg  
cgaaagcgtatcgtgggttcgaatcccacactcactgccca  
1-5tRNA-Ser(tga)c[210921,211010]  
ggtgaagtggcagagcggtttaatgcaacggtcttgaaaaccgtcgaggg  
cgaaagtcctccgtgagttcaaatctcaccttcaccgccca

1-6tRNA-Gly(tcc)c[212040,212112]  
 gcaggtaaagtgttgatggcggcatagctactccgattctgggggtgg  
 ggttcaaattccccatacctgctc  
 >KJ676859.1 Bacillus phage JBP901, complete genome  
 1-1tRNA-Met(cat)c[156041,156115]  
 taggattatagctcagtggtagagcgtgggtctcataagccaaggctcga  
 tggttcgatcccatctattcctatc  
 1-2tRNA-Leu(tag)c[156207,156291]  
 gtcgaagtgttggaactggtatacatgcggcacttagaatgccgtgcctt  
 cgggattgtgggttcgactcccacttcgacacca  
 1-3tRNA-Ile(gat)c[156300,156376]  
 actagtgtagctcagtcagtagagcagtgcttgataaggcattggctc  
 taggttcaaattcctaccactagtacca  
 1-4tRNA-Leu(taa)c[156383,156469]  
 atcggaatgttggaattggtagacataacggacttaaaatccgttgctcg  
 tagagcgtggcgggttcgagtcctccctccgatacca  
 1-5tRNA-Tyr(gta)c[156473,156555]  
 gggcgtgcaatcattggagagataagctgactglaaatcagtggtcattg  
 actgtggaggttcgaatccttcattcccacca  
 1-6tRNA-Phe(gaa)c[156562,156636]  
 ggatagatagctgagatggattagcgaaggattgaaactccttagaggt  
 ggatcgttaccactctgtccacca  
 1-7tRNA-Pro(tgg)c[156731,156802]  
 gtagatgtaggctagagtcagtcactccgttggggcggaggtcacgca  
 ggttcgatccctgccatctgca  
 1-8tRNA-His(gtg)c[156909,156982]  
 cagtggtggtgaagtggcttaacacggacgactgtggatcggtcattag  
 caggttcgaatcctgtcatgtga  
 1-9tRNA-Gln(ttg)c[157060,157135]  
 ttctgggtggacaaactggtaaagtcactaggctttgaccctaggtttt  
 ggaggttcgacccttcaccgaagt  
 1-10tRNA-Ser(tga)c[157217,157306]  
 cggggaataactcaagtggataaaagaggtagtcttgaaaactactaggc  
 gtataaaagcgtgcgggggttcgaatccctcttctcctcggc  
 1-11tRNA-Arg(tct)c[157312,157387]  
 taccctttagccaagtggactaaggcagcgggcttctatcccgaagatc  
 gtgggttcaaattcctacaggggtgt  
 1-12tRNA-Ile(tat)c[157507,157580]  
 atccctttagccaagcgttaaggcagtaggattatgtcctgcgtatcgg  
 gagttcgatcctccaaggggcgc  
 1-13tRNA-Asp(gtc)c[157582,157655]  
 tggggataatagtgtagaggttaacacgcacggctgtctaccgtgaagcac  
 ggggttcgaatccggttatcctcgt  
 1-14tRNA-Thr(tgt)c[157743,157819]

gccttcttagctcagttggtagagcgactgccttgtaagcagtaggtcg  
tgggttcgaatcctacagtcggcacca  
1-15tRNA-Glu(ttc)c[158378,158454]  
gtcgcattggtgaaattggtaacacactcggctttctaccgagcattc  
gcaggttcgaatcctgtatcgatatc  
1-16tRNA-Asp(gtc)c[158462,158535]  
ggctcgttagtttaacggtaaaatacatgactgtctatcatgggtcacgg  
gttcaactcccgtacgggtcgcca  
1-17tRNA-Gly(tcc)c[158540,158614]  
ggggcattggatatattggctattattcttggctccaaccaagcgaggtc  
ggttcgattccgacatgtccctcca  
1-18tRNA-Asn(gtt)c[158618,158693]  
gtgctttagctcagtcggttagagctgggtggctgtaaccactgtgtcgt  
aggttcgattcctacctagcacgcca  
1-19tRNA-Cys(gca)c[158739,158812]  
gagggtgtaccgaagcggctcaacggcacagattgcaaccctgttgttcg  
tgggttcaaataccaccatcctct  
1-20tRNA-Ser(gct)c[158819,158907]  
ggaagggtactcaagttgggaagaggtcaacctgctaagttgatagtac  
ctgttaaaggtagcgagggttcgaatccctttcctcct

>JN225449.1 Enterobacteriophage UAB\_Phi87, complete genome

1-1tRNA-Leu(taa)c[45,123]  
gtccattactccaattggcagagaggccagactaaaatctgtgttatg  
tatcggttcgaatccgatatggagtacca  
1-2tRNA-Gln(ttg)c[126,201]  
aggggattagtttacaaggttaaaacctcggctttgaaatcgaagaagt  
tggttcaattccaacatcccccgcca  
1-3tRNA-Arg(acg)c[1025,1100]  
gcaggattagttcaaattggatagagcaacagtctacgaagctgtaatatg  
gggttcgaatcccttatcctgcgcca  
1-4tRNA-Leu(caa)c[1106,1183]  
gttcagtatcccaattggcagaggatgcaagctcaaacctgtactagt  
cacggttcgaatccgtcttggaaacacca  
1-5tRNA-Val(tac)c[1185,1259]  
actcgttagtttatatggtaaaacatcaccttacaagatgaagaaaaa  
ggttcaagtccttttagtgagtacca  
1-6tRNA-Thr(tgt)c[1355,1430]  
gtcctatcgtataattggctattacggttgccttgaagcaacttatca  
gggttcgaatccttgtgggagcacca  
1-7tRNA-Gly(tcc)c[1438,1512]  
gcatccatagtttaaacgggaaaattacagtcttccaaactgaggttgag  
ggttcgattccctctggatgtcca  
1-8tRNA-Ala(tgc)c[1519,1594]  
ggggtcatagtttatatggttaaaattcgagtttgcgaacttgggaact

gagttcaattctcagtactccacca  
1-9tRNA-Lys(ctt)c[1601,1676]  
gcaggtgtagcaaatgggtatgcggctgactcttaatcagtaagacgat  
gggttcaattccctccacctgtacca  
1-10tRNA-Leu(tag)c[1684,1761]  
gggagattgacggaattggtaaacctaccatccttagaagttggtgtt  
gagggttcgaatccctgtctctacca  
1-11tRNA-Ser(tga)c[2018,2107]  
ggtaggtagcggctaattggtagccaaactgtcttgaacagttgccact  
gtagagatacggtaggggttcgactccttacttaccgcc  
1-12tRNA-Arg(tct)c[2346,2422]  
gcacccttagttcaattggatagagcaacggtcttctaaatcgtagtta  
cagggttcgaatcctgtagggtgtgcca  
1-13tRNA-Ile(gat)c[2759,2834]  
gctggtatagttaagaaggtataacactcccctgataagggaacatcgg  
tggttcgattccacctaccagtacca  
1-14tRNA-Met(cat)c[2836,2912]  
ggttcagtcgcagataaggtaatgcaagggtctcataagccctatgaatg  
tgggttcgattcccatctgaacctcca  
1-15tRNA-Lys(ttt)c[2917,2992]  
ggaagtgtacagaatgggtgatgcggcagacttttaatctgacaggcgt  
gggttcgaatccctccacttctacca  
1-16tRNA-Asp(gtc)c[3451,3527]  
ggttatgtagttaactggttaaaatactcccctgtcacgggagatgatg  
agggttcaaatcccttcgtaaccgcca  
1-17tRNA-Tyr(gta)c[3534,3621]  
gtgtcgttatcccgtataggtagcgggtgggactgtaaatccctgtca  
ttgagactcggtaggttcgactcctacacggcacacca  
1-18tRNA-Asn(gtt)c[3631,3707]  
ggttaggaagcacataaggtatgtcggtcgcctgttaagcgaatggcac  
agggttcgaatccctgactaaccgcca  
1-19tRNA-Met(cat)c[3785,3861]  
tgcgggtatagagaaggcgctctcacatgtctcattagcatggtatcgg  
cagggttcgactcctgcacccgcctcca  
1-20tRNA-Glu(ttc)c[3953,4030]  
gttcagtagacaaaacggtaaaagtcaccactcttcaaagtggaatatt  
gagggttcaaatcccttctggaacgcca  
1-21tRNA-Pro(tgg)c[4038,4114]  
ctctgttagctcagcttggtagagcgttcggttggggcggttaaggccg  
gaggttcaagtccccaacagagacca  
1-22tRNA-Cys(gca)c[8591,85986]  
gaatccgtgacagaaatggctatgtgcctgtctgcaaacagggttataa  
gggttcgagtccttcggtattctcca  
1-23tRNA-Ser(gct)c[85991,86083]

ggaagattaaccctaaaaggtaaggagcagtttgctaaactgccagtag  
ctgagaaatcggtgtaccagttcaagctcgtatcttctcca  
1-24tRNA-Phe(gaa)c[86836,86911]  
agtccaagtagcttatatggttaaagcgctgtctgaaaaacatgagaag  
agggttcaaatcccactggactacca  
1-25tRNA-His(gtg)c[86918,86993]  
gtggccttatcataaatggtaatgacccatgctgtgaacatggtctatac  
gggttcaaatcccgtaggtcacccca  
1-26tRNA-Gln(ctg)c[87025,87100]  
agcggtagcataactggcaatgcagcagctctgaagctgcctatta  
agggttcaaatccttatgccgtgccca  
1-27tRNA-Leu(taa)c[87106,87184]  
gtccattactccaattggcagagaggccagactaaaatctgtgttatg  
tatcggttcgaatccgatatggagtacca  
1-28tRNA-Gln(ttg)c[87187,87262]  
aggggattagtttacaaggttaaaacctcggctttgaaatcgaagaagt  
tggttcaattccaacatcccccgcca

>KP010413.1 Salmonella phage vB\_SPuM\_SP116, complete genome

1-1tRNA-Pro(tgg)[26880,26956]  
ctctgttagctcagcttggtagagcgttcggttggggcggttaaggccg  
gaggttcaagtcctccaacagagacca  
1-2tRNA-Glu(ttc)[26964,27041]  
gttccagtagacaaaatggtatagtcaccactcttcaaagtgatattt  
gagggttcaaatcccttctggaacgcca  
1-3tRNA-Met(cat)[27133,27209]  
tgcgggtatagagaaggcgctctcacatgtctcattagcatggtatcgg  
caggttcgactcctgcacccgcctcca  
1-4tRNA-Asn(gti)[27288,27364]  
ggttaggaagcacataaggtatgtcggtcgcctgttaagcgaatggcac  
agggttcgaatccctgactaaccgcca  
1-5tRNA-Tyr(gta)[27434,27521]  
gtgtcggtatcccgtagatggtagcgggtgggactgtaaatccctgtca  
ttgagactcggtaggttcgactcctacacggcacacca  
1-6tRNA-Asp(gtc)[27527,27604]  
ggctatgtagtttaatagggttaaaatactcccctgtcacgggagatgat  
gtgagttcaagtctcatcgtagccgcca  
1-7tRNA-Met(cat)[27841,27917]  
ggttcagtcgcagataaggtaatgcaagggttcataagccctatgaatg  
tgggttcgaatcccatctgaacctcca  
1-8tRNA-Ile(gat)[27920,27994]  
tgtgggttagcataaatggtaatgcaaacggctgataaccgtagaagag  
gggttcgataccctcacctacaacca  
1-9tRNA-Arg(tct)[28331,28407]  
gcacccttagttcaactggacagaacaaatgacttctaatacattaggtta

caggttcgaatcctgtaggggtgccca  
1-10tRNA-Ser(tga)[28646,28735]  
ggtaggtagcggctaattgtagccaaacagctctgaaaactgtgccact  
gtagagatacggtaggggtcgactccttactaccgcc  
1-11tRNA-Leu(tag)[28988,29064]  
gcacctatagcccaactgtagaggcagcagacttagaatctgctcagtg  
tgagttcgaatctctctaggtgtacca  
1-12tRNA-Lys(ctt)[29072,29147]  
gcagggtagcaaaatgggtatgcggctgactcttaatcagtaagacgat  
gggttcaattccctccacctgtacca  
1-13tRNA-Ala(tgc)[29154,29229]  
ggggatgtagtttacatgggtaaaacataagtttgcaaacttaagtaca  
gggttcaattccctgcttctccacca  
1-14tRNA-Gly(tcc)[29236,29310]  
gcatccatagtttaaacgggaaaattacagtcttccaaactgaggttgag  
ggttcgattccctctggatgctcca  
1-15tRNA-Thr(tgt)[29318,29394]  
gctgcttctgataattggctattacacatccattgtaaggatggaaatg  
caggttcgagtcctgtgagcagcacca  
1-16tRNA-Val(tac)[29490,29564]  
actcgcttagtttataggtaaaacatcaccttacaagatgaagaaaaa  
ggttcaagtccttagtgagtacca  
1-17tRNA-Leu(caa)[29566,29643]  
gttcagtatcccaattggcagaggatgcaagctcaaacctgtattagt  
gacggttcgaatccgtcttgaacacca  
1-18tRNA-Arg(acg)[29758,29833]  
gcaggattagttcaaatggatagagcagcagctctacgaagctgtaatag  
gggttcgaatcccttatcctgcgcca  
1-19tRNA-Gln(ttg)[30419,30494]  
aggggattagtttacaagggttaaacctcggctcttgaaatcgaagaagt  
tgggtcaattccaacatcccccgcca  
1-20tRNA-Leu(taa)[30497,30575]  
gtccattactccaattggcagagaggccagactaaaatctgtgttatg  
tatcggttcgaatccgatatggagtacca  
1-21tRNA-Gln(ctg)[30581,30656]  
agcggtagtagcataactggcaatgcagcagctctgaagctgtcttatta  
aggttcaaatccttatgccgctgccca  
1-22tRNA-His(gtg)[30688,30763]  
gtggccttatcataaatggtaatgacctatgctgtgaacatgggtctatac  
gggttcaaatcccgtaggtcacccca  
1-23tRNA-Phe(gaa)[30770,30845]  
agtccaagtagcttatatgggttaaagcgctgtctgaaaaacatgagaag  
agggttcaaatcccactggactacca  
1-24tRNA-Ser(gct)[31598,31690]

ggaagattaaccctaaaaggtaaggagcagtttgctaaactgccagtag  
ctgagaaatcgggtgtaccagttcaagctcggatcttctcca  
1-25tRNA-Cys(gca)[31695,31770]  
gaatccgtgacagaaatggctatgtgcctgtctgcaaacagggttataa  
gggttcgagtccttcggattctcca

>KP037007.1 *Erwinia* phage phiEa2809, complete genome

1-1tRNA-Lys(ttt)[147462,147537]  
ttcgtgatagctcagttggtagagcagcctcctttaagaggcaggtcac  
tggttcaagtcagttcacggcacca

>JX560968.1 *Escherichia* phage EC6, complete genome

1-1tRNA-Pro(tgg)[11934,12010]  
ctctgttagctcagattggtagagcgttcggttggggcggttaagccg  
gaggttcaagtcctccaacagagacca  
1-2tRNA-Glu(ttc)[12018,12095]  
gttcagtagacaaaatggtatgtcaccactcttcaaagtgatattct  
gagggttcaaatcccttctggaacgccca  
1-3tRNA-Met(cat)[12181,12257]  
cgcgggtatagagaaaggcgctctcacatgtctcattagcatggaacgg  
ttggttcgactccaacacccgcctcca  
1-4tRNA-Asn(gtt)[12343,12419]  
ggttaggaagcacataaggtatgtcgggtcgcttgaagcgaatggcac  
agggttcgaatccctgactaaccgccca  
1-5tRNA-Tyr(gta)[12428,12515]  
gtgtcggtatcccgtagatggtagcgggtgggactgtaaatcccttgta  
ttgagactcggtagggttcgactcctacacggcacacca  
1-6tRNA-Asp(gtc)[12521,12597]  
ggctatgtagttaactggagaaaatactcccctgtcacgggagatgatg  
tgagttcaagtcctcatcgtagccgccca  
1-7tRNA-Lys(ttt)[13024,13099]  
ggaagtgtagcagaatgggtgatgcggcagacttttaactctgacaggcgat  
gggttcgaatccctccacttctacca  
1-8tRNA-Met(cat)[13104,13180]  
ggttcagtcgcagataaggtaatgcaagggtctcataagccctatgaatg  
tgggttcgaatcccatctgaacctcca  
1-9tRNA-Ile(gat)[13183,13257]  
tgtgggttagcataaatggtaatgcaaacggctgataaccgttagaagag  
ggttcgataccctcacctacaacca  
1-10tRNA-Ser(tga)[13827,13916]  
ggtaggtagcggctaattggtagccaaactgtcttgaaaacagttgccact  
gtagagatacggtaggggttcgactccttacttaccgcc  
1-11tRNA-Leu(tag)[14170,14247]  
gggagattgacggtaattggtaaacctatctcgcttagaacgagatgttt  
gagggttcgaatcccttctctctacca  
1-12tRNA-Lys(ctt)[14255,14330]



gcaggtgtagcaaaatggttatgcggctgactcttaacagtaagacgat  
gggttcaattccctccacctgtacca

1-13tRNA-Ala(tgc)[14336,14411]

ggggcatagtttatatggttaaaattcgagtttgcaaacttggaact  
gagttcaattctcagtgactccacca

1-14tRNA-Gly(tcc)[14418,14492]

gcatccatagtttaaacgggaaaattacagttccaaactgaggttgag  
ggttcgattccctctggatgctcca

1-15tRNA-Thr(tgt)[14500,14576]

gctgctttcgataattggctattacacatccctgtaaggatggaaatg  
caggttcgagtcctgtgagcagcacca

1-16tRNA-Val(tac)[14672,14746]

actcgcttagtttatatggtaaagcccatccttacaagttggtgaaaa  
ggttcaagtccttagtgagtacca

1-17tRNA-Leu(caa)[14748,14825]

gttcagtatcccaattggcagaggatgaagctcaaacttgtagtagt  
gacggttcgaatccgtcttggaacacca

1-18tRNA-Arg(acg)[14940,15015]

gcaggattagttcaaatggatagagcaacagctctacgaagctgtaatag  
gggttcgaatcccttatacctgcgcca

1-19tRNA-Gln(ttg)[15839,15914]

aggggattagtttacaaggttaaaacctcggtcttgaaatcgaagaagt  
tgggtcaattccaacatcccccgcca

1-20tRNA-Leu(taa)[15917,15995]

gtccattactccaattggcagagaggccagacttaaaatctgtgtatg  
tatcggttcgaatccgatatggagtacca

1-21tRNA-Gln(ctg)[16001,16076]

agcggatagcataactggcaatgcagcagctctgaagctgtcttatta  
aggttcaaatccttatgccgtgcca

1-22tRNA-His(gtg)[16108,16183]

gtggccttatcataaatggtaatgacccatgctgtgaacatggtctatac  
gggttcaaatcccgtaggtcacccca

1-23tRNA-Phe(gaa)[16190,16265]

agtccaagtagcttatatggttaaagcgcgtgtctgaaaaacatgagaag  
agggttcaaatccactggactacca

1-24tRNA-Ser(gct)[17018,17110]

ggaagattaaccctaaaaggtaaggagcagtttgctaaactgccagtag  
ctgagaaatcggtgtaccagttcaagctggtatcttctcca

1-25tRNA-Cys(gca)[17115,17190]

gaatccgtgacagaaatggctatgtacctgtctgcaaaacaggtttataa  
gggttcgagtccttcggattctcca

>KM236240.1 Citrobacter phage Moon, complete genome

1-1tRNA-Leu(taa)[70996,71080]

gcatcgatggtggaactggtatacacatggcacttaaatgccacgccgt

aaggattgaggttcaaaccctctcgatgcacca  
1-2tRNA-Met(cat)c[71082,71158]  
ggccctatagctcaattggttagagcaaccggctcataactggtaggtt  
ctggttcaagtcagatgggtcacca  
1-3tRNA-Thr(tgt)c[71197,71272]  
gctgatttagcttaggttagagcaactcacttgaatgagaaggtcgg  
cggttcgattccgtcaatcagcacca  
1-4tRNA-Pro(tgg)c[71277,71353]  
ctccgcatagctcagcttggttagagcgctggttgggaccaggaggtcg  
aatgttcgagtcattctgtggagacca  
1-5tRNA-Gly(tcc)c[71665,71739]  
gcatccatcgatatgcgatattatgactggctccacccagtagatgag  
agttcgattctctctggatgctcca  
1-6tRNA-Met(cat)c[71892,71964]  
tgcgggttaacttcagtggtagaatgacgggtcatatcccggttacgcga  
tggttcgagtcctacacccgcca  
1-7tRNA-His(gtg)c[72279,72354]  
gtggccgtagttcagttggtagaactcgagattgtggttctcatagtc  
ggattagaattccacaggtcacccca  
1-8tRNA-Gln(ttg)c[72462,72536]  
tgaatcgtagccaagctggttaaggcaataggtttgatcctatgatccct  
ggttcgagtcaggcggttcagcca  
1-9tRNA-Asn(gtt)c[72543,72618]  
ggatgtatagctcagctggttagagcggtcgcccgttaagtattggtccg  
cggttcgaatccgtgtacatccgcca

>KF925357.1 Escherichia phage HY01, complete genome

1-1tRNA-Arg(tct)c[68788,68863]  
cgaggcatagctcagaaggaagagcaaggaccttctaagtcctaggtcgt  
aggttcgatccctactgcctcgacca  
1-2tRNA-Asn(gtt)c[68868,68942]  
ggatgttagctcaatggcagagcgatcgctgtaagcgattggttata  
ggttcgaatcctatcacgtccgcca  
1-3tRNA-Tyr(gta)c[68947,69033]  
ggggagtattccgtagaggtagcgggtggactgtaaatccattgtcat  
tgcgactcgggtggttcgactccatcactccccacca  
1-4tRNA-Met(cat)c[69043,69117]  
ggccctgtagctggaaggttaagcaagcgactcataatcgccagatggt  
ggttcaattccaccagggccacca  
1-5tRNA-Thr(tgt)c[69119,69194]  
gctgatttagctcagtaggttagagcaactcacttgaatgagaaggtcgg  
cggttcgattccgtcaatcagcacca  
1-6tRNA-Ser(tga)c[69200,69289]  
ggaggcgtggcagagtgtttaatgcaccggtcttgaaaaccggcagtcg  
ctccggcgactcataggttcgaatcctatcgctccgcca

1-7tRNA-Gly(tcc)c[69951,70024]  
 gcggatatcgtataatggcattacctcagactccaatctgatgatga  
 gttcgattctcattatccgctcca  
 1-8tRNA-Leu(taa)c[70030,70116]  
 gcgagaatgggtcaaattggtaaaggcacagcacttaaatgctgcggaat  
 gatttccttgggttcgagtccttctcgacca  
 1-9tRNA-Gln(ttg)c[70117,70190]  
 tgggaattagccaagttgtaaggcactggatttgattccaggatgcaa  
 aggttcaagtcctttattcccagc  
 >KJ081346.1 Bacillus phage BCP8-2, complete genome  
 1-1tRNA-Met(cat)c[33452,33526]  
 tacggttatagctcagtggttagagtggtgtcctaagcccaaggtcga  
 tggttcaatcccatctaaccgtatc  
 1-2tRNA-Leu(tag)c[33706,33791]  
 gtcagagtgttgaattggtagacttggcagattagaatctgctgcct  
 agtggcgtgagggttcaagtcctccttgacacca  
 1-3tRNA-Ile(gat)c[33800,33876]  
 actagttagctcagtcaggtagagcagtgcttgataaggcattggtca  
 caggttcaaatcctgtcactagtagca  
 1-4tRNA-Leu(taa)c[33947,34033]  
 atcggaatgttgaattggtagacataacgcacttaaatgcgttgctcc  
 ttggggcgtgagggttcgacttctcttccgatacca  
 1-5tRNA-Tyr(gta)c[34037,34119]  
 gggcgtgcaatcattggagagataagctgactgtaaatcagtggtcgttg  
 actgtggaggttcgaatccttccattcccacca  
 1-6tRNA-Phe(gaa)c[34126,34200]  
 ggatagatagctgagatggattagcgaaggattgaaactccttagaggtt  
 ggatcgttaccaactctgtccacca  
 1-7tRNA-Pro(tgg)c[34298,34369]  
 gtagatgtaggctagaggtcagtcactccgttggggcggaggtcacgca  
 ggttcgatccctgccatctgca  
 1-8tRNA-His(gtg)c[34477,34550]  
 cagtggtggtgaagtggctaacacgaacgactgtggctcgtttattcg  
 cagggtcgaatcctgtcatgctga  
 1-9tRNA-Gln(ttg)c[34627,34703]  
 tttcgggatggacaaactggtaaaagtcactaggctttgaccctaggtttt  
 ggaggttcgaccccttctcccgaagtc  
 1-10tRNA-Ser(tga)c[34778,34865]  
 ggagggctactctaactggaagagacctgccttgaaagcagacgtaggg  
 taaaaccgataggagttcagtcctcctgccctctcca  
 1-11tRNA-Arg(tct)c[35009,35083]  
 acctctatcgccaagcggatcaaggcaacgggcttctatcccgttaatcg  
 ggagttcgaatctctctaggggtgc  
 1-12tRNA-Glu(ttc)c[35086,35161]

tgctgcattgggtgaagcgggtctaacacactcggctttctaccgagcatac  
gcaggttcgaatcctgtatgcgatat  
1-13tRNA-Gly(tcc)c[35666,35741]  
ggggcattcgtatagtggcttattatacctggctccaaccaggggaggt  
ggttcgattaccacatgtccctcca  
1-14tRNA-Thr(tgt)c[35747,35823]  
gccttcttagctcagttggtagagcgactgccttgaagcagtaggtcg  
tgcgttcgaatcgtacagtcggcacca  
1-15tRNA-Asp(gtc)c[35836,35909]  
ggctcgttagtttaacggtaaaatacatgactgtctatcatgggtcacgg  
gttcaactcccgtacgggtcgcca  
1-16tRNA-Asn(gtt)c[36104,36179]  
gtgcctgtagctcagttggtagagcagaacctgttaaggttaagtcgt  
aggttcgaacctaccaggtacgcca  
1-17tRNA-Cys(gca)c[36225,36298]  
gagggtgtaccgaagcgggtcaacggcacagattgcaacctgttgttca  
ggagttcgaatctcctcatcctct  
1-18tRNA-Ser(gct)c[36309,36396]  
ggaaaggtactcaagtcgggaagagatcagtttgctaaactgatagtac  
ctgtaaaggtagcaggggttcgagtccttcttcca

>JX181824.1 Salmonella phage SSE-121, complete genome

1-1tRNA-Thr(tgt)[28,102]  
gtctcctaaagcataagtggcgatgcagcggccttgaagccgaagaagtg  
ggttcgattcctactgggagcacca  
1-2tRNA-Ile(gat)[109,184]  
tcctcgttagctcaagttggtagagcagtcaccaagattcgggataagcac  
aggttcgattcctgtacgaggagcca  
1-3tRNA-Leu(taa)[973,1058]  
gcaggtgtgggtggaatggagatacacaggagactaaaatctcccgtt  
aaatgattacgagttcgagtcctcgtcacctgcacca  
1-4tRNA-Arg(tct)[1066,1140]  
cggggtgtagtctaaggataggcagcggcttctaaaccgctcaatgt  
ggttcgaatccagccacctcgacca  
1-5tRNA-Cys(gca)[1259,1332]  
gcacggttgctggagtggaacagcttcggctgcaaaccgaatgtcagga  
gttcgattcttctaccgtgtcca  
1-6tRNA-Tyr(gta)[1985,2068]  
ggctcattggcagaacggtgattgcagcggattgtaaatccgtgcccttc  
ggggttcctggttcgaatccaggtgggccacca  
1-7tRNA-Ile(gat)[2076,2151]  
gggagtatagctcagtttagtagagcgtcgaccgataatcgagaggtcgc  
aggagcaaagcctgctactcccacca  
1-8tRNA-Gly(tcc)[2159,2232]  
gcgtcattagtgttagcgggtccagcatccgtcctccaagtcgggtggca

tcggttcgaatccgatatgacgct  
1-9tRNA-Glu(ttc)[2240,2316]  
gtcctgttagacaaactggtaaagtcaccacccttcaaggtggggttg  
cgggttcgatccccgcacaggacgcca  
1-10tRNA-Gln(ttg)[2406,2482]  
agggggttagcatagctggcctaalgcatcgggcttgaactcgacatcg  
gaggttcgaatcctccacccctgcca  
1-11tRNA-Ser(gga)[2596,2687]  
ggtggaaatggtcgagcggtttaagacagcatcttgaaagggtcggccc  
cttaacaggggtccgtaggtcaaactctactccaccgcca  
1-12tRNA-Ser(gct)[2982,3074]  
ggaagattaaccctaatacagtaaggatctcttgctaaagagacagta  
gccccgaaaggggtgtgtcagttcaagtctgacatcttctcc  
1-13tRNA-Ser(tga)[3075,3163]  
ggagagcaggacgcatggtgcgtaatccggttgaacccggacccatcgt  
agcgatacggtagacagttcgattctgttgctctctcca  
1-14tRNA-Asn(gtt)[3316,3400]  
gacgagttggcctagtggtgggcgacggcctgtaagccgtgagtgaaa  
actcaaggaaggtcaaactcttactcgtcgcca  
1-15tRNA-Asp(gtc)[3408,3484]  
ggggccgtggctgacaaggtaatggtccgcactgtctatcgggaaaatg  
agggttcgatccccttcggcctcgcca  
1-16tRNA-Pro(tgg)[3582,3659]  
ctgttcgtagcgcagctctggtcagcgtgggtcccttggaaggatcaggtc  
ggtggtcaaataccaccggacagacca  
1-17tRNA-Arg(acg)[3847,3923]  
gcgagcatagcttaattgaatagagcttcgtacatacgaaggcggaagatc  
ggggtttgaatccctgtacttcacca  
1-18tRNA-Ala(tgc)[3927,4005]  
ggggaatgggtctgcttgagtggaacacctgcctgcaccgaggatatca  
gaagagttcgaatctctattctccacca  
1-19tRNA-Leu(tag)[4112,4188]  
gggcgattgatggaattggtatacgtgccgtccttagaagtcggatttg  
ggggttcgagtcctctgcgccacca  
1-20tRNA-Val(tac)[4196,4270]  
gcttccttagttcaatggtagaacgttgtctttacacggcaagcgtcgg  
ggttcgattccatcaggaagtacca  
1-21tRNA-Phe(gaa)[4278,4353]  
gggggtgtaactcagttggtagagtcctgcctgaagagcagatggtcgg  
tggttcgagtcacccggccccacca  
1-22tRNA-Ala(ggc)[4360,4441]  
tgcgtggtagtgaacggatatatagatcatgttggcctcataagccgaa  
gattgcgggttcgactcccgtcacgcatcca  
1-23tRNA-Met(cat)[144815,144891]

ggttctgtagcttagttggtagagcgcttccctcataaggaagaggtcg  
caggttcaattcctgccagaactacca  
1-24tRNA-Lys(ctt)[145584,145659]  
ggggattaacacacggttagttagcgccctctaagccgaaggtcga  
aggttcgaatcctcatgccccacca

>AB897757.1 Klebsiella phage K64-1 DNA, complete genome

1-1tRNA-Leu(taa)[177141,177228]  
ggccgtatgtccaaattggtaaaggagacagactaaaatctgttggtga  
tattcaccttctcgattcgagttcgagtcggtgctacca  
1-2tRNA-Gly(tcc)[177595,177670]  
gcggttatcgataaaggctattacctcggtttccaaaccgatgatgag  
ggttcgacgtccctctaaccgtcca  
1-3tRNA-Arg(tct)[178961,179034]  
gtccccttagttcagttggatagaacaactgccttctaagcagtaggtca  
ctggttcgagtcagtaggggata  
1-4tRNA-Ser(gct)[179186,179274]  
tagtgagttggatgagtggtgaaatcaccacctgctaagtggtgcatat  
gcgaaagcgtatcgtgggtcgaatccacactcactgt  
1-5tRNA-Ser(tga)[179335,179422]  
ggaaggatggccgagtggttaaggcactggtcttgaaccagcaatcc  
gaaagggttctagagttcaaatctctatcctccacca  
1-6tRNA-Met(cat)[179541,179618]  
ggccctttactctcaagtggttagagaatccgactcataatcggtaggct  
ctgagttcgaatctcagaagggccacca  
1-7tRNA-Asn(gtt)[180355,180428]  
gactctgtagcacaatcggtggtgcgattgactgtaataatggttgg  
ggattcgagttcctccagagtcgc

>JX181825.1 Salmonella phage STML-198, complete genome

1-1tRNA-Arg(tct)c[102970,103046]  
cgaggcatagcttaatagtatagagcaacggtcttctaaccgtaggttg  
aaggttagaatccttctgtctcgacca  
1-2tRNA-Gln(ttg)c[103686,103761]  
tgggaattagccaagttggttaaggcaccggttttgattccgggatgcac  
tggttcgagcccagttatccagcca  
1-3tRNA-Met(cat)c[103768,103843]  
ggcccccttagctcagtggttagagcaggcgactcataatcgcttggtcgc  
tggttcaagtcagcaggggccacca

>KM657822.1 Escherichia phage vB\_EcoM-VpaE1, complete genome

1-1tRNA-Pro(tgg)[25483,25559]  
ctctgttagctcagcttggttagagcggtccgtttggggcggttaaggccg  
gaggttcaagtctccaacagagacca  
1-2tRNA-Glu(ttc)[25567,25644]  
gttcagtagacaaaatggtatagtcaccactcttcaaagtggtatatt  
gagggttcaaatcccttctggaacgcca

1-3tRNA-Met(cat)[25736,25812]  
tgcgggtatagagaaggcgctctcacatgtctcattagcatggtatcgg  
caggttcgactcctgcacccgcctcca  
1-4tRNA-Asn(gtt)[25898,25974]  
ggttaggaagcacataaggtatgtcggtcgcctgttaagcgaatggcac  
agggttcgaatccctgactaaccgcca  
1-5tRNA-Tyr(gta)[25984,26071]  
gtgtcggtatcccgtagatggtagcgggtgggactgtaaatcccttgta  
ttgagactcggtagggttcgactcctacacggcacacca  
1-6tRNA-Asp(gtc)[26077,26154]  
ggttatgtagttaatctggtaaaatactcccctgtcacgggagatgat  
gagggttcgaatcccttcgtaaccgcca  
1-7tRNA-Lys(ttt)[26584,26659]  
ggaagtgtagcagaatggtagcggcagacttttaatctgacaggcgat  
gggttcgaatccctccacttctacca  
1-8tRNA-Met(cat)[26664,26740]  
ggttcagtcgcagataaggtaatgcagggtctcataagccctatgaatg  
tgggttcgattcccatctgaacctcca  
1-9tRNA-Ile(gat)[26743,26817]  
tgtgggttagcataaatggtaatgcaaacggctgataaccgttagaagag  
ggttcgataccctcacctacaacca  
1-10tRNA-Arg(tct)[27067,27143]  
gcacccttagttcaactggacagagcaaatgacttctaattcattgagtta  
caggttcgaatcctgtagggtgtgcca  
1-11tRNA-Ser(tga)[27382,27471]  
ggtaggtagcggctaattggtagccaaactgtcttgaacagttgccact  
gtagagatacggtaggggttcgactccttactaccgcc  
1-12tRNA-Leu(tag)[27728,27805]  
gggagattgacggtaattggtaaacctatctcgcttagaacgagatgtt  
gaggggttcgaatcccttgtctcctacca  
1-13tRNA-Lys(ctt)[27813,27888]  
gcaggtgtagcaaaatggttatgcggctgactcttaatcagtaagacgat  
gggttcaattccctccacctgtacca  
1-14tRNA-Ala(tgc)[27895,27970]  
ggggtcatagtttatatggttaaaatcgagtttgcaaacttggaact  
gagttcaattctcagtgactccacca  
1-15tRNA-Gly(tcc)[27977,28051]  
gcatccatagtttaaacgggaaaattacagtcttccaaactgaggttgag  
ggttcgattccctctggatgctcca  
1-16tRNA-Thr(tgt)[28058,28134]  
gctgctttcgataattggctattacacatccctgtaaggatggaaatg  
caggttcgagtcctgtgagcagcacca  
1-17tRNA-Val(tac)[28230,28304]  
actcgcttagtttatggtaaaacatcacccctacaagatgaagaaaaa

ggttcaagtccttagtgagtacca  
1-18tRNA-Leu(caa)[28306,28383]  
gttccagatcccaattggcagaggatgcaagctcaaacctgtactagt  
gacggttcgaatccgtcttggaaacacca  
1-19tRNA-Gln(ttg)[28969,29044]  
aggggattagtttacaaggttaaaacctcggctttgaaatcgaagaagt  
tggttcaattccaacatcccccgcca  
1-20tRNA-Leu(taa)[29047,29125]  
gtccattactccaattggcagagaggccagactaaaatctgtgttatg  
tatcggttcgaatccgatatggagtacca  
1-21tRNA-Gln(ctg)[29131,29206]  
agcggtagcataactggcaatgcaacagtctctgaagctgcctatta  
aggttcaaactcttatgccgctgcca  
1-22tRNA-His(gtg)[29238,29313]  
gtggccttatcataaatggtaatgacctagctgtgaacatggctctatac  
gggttcaaactccgtaggtcacccca  
1-23tRNA-Phe(gaa)[29320,29395]  
agtccaagtagcttatatggttaaagcgcgtgtctgaaaaacatgagaag  
agggttcaaactccactggactacca  
1-24tRNA-Ser(gct)[30148,30240]  
ggaagattaaccctaaaaggttaaggagcagtttgctaaactgctagtag  
ctgagaaatcggtgtaccagttcaagctgggtatcttctcca  
1-25tRNA-Cys(gca)[30245,30320]  
gaatccgtgacagaaatggatatgtgcctgtctgcaaaacaggtttataa  
gggttcaagtccttcggattctcca

>HE956711.1 Yersinia phage phiD1 complete genome

1-1tRNA-Arg(tct)c[68808,68883]  
cgaggcatagctcagaaggaagagcaaggaccttctaagtcctgggtcgt  
aggttcgatccctactgcctcgacca  
1-2tRNA-Asn(gtt)c[68888,68962]  
ggatgtgtagctcaatggcagagcgatcgctgttaagcgattggttata  
ggttcgaatcctatcacgtccgcca  
1-3tRNA-Tyr(gta)c[68967,69053]  
ggggagtatcccgtagaggtagcgggtggactgtaaattcattgtcat  
tgcgactcgggtggttcgactccatcactccccacca  
1-4tRNA-Met(cat)c[69066,69140]  
ggccctgtagctggaaggttaagcaagcgactcataatcgccagatggt  
ggttcaattccaccagggccacca  
1-5tRNA-Thr(tgt)c[69142,69217]  
gctgatttagctcagtaggttaggcacctcacttgtaatgaggacgtcgg  
cggttcgattccgtcaatcagcacca  
1-6tRNA-Ser(tga)c[69224,69313]  
ggaggcgtggcagagtggtttaatgcaccggtcttgaaaaccggcagtcg  
ctccggcgactcataggttcaaactctatcgctccgcca



1-7tRNA-Pro(tgg)c[69315,69389]  
ctccgtgtagctcagtttggtagagcgctgatttgggatcaggaggtcc  
aaggttcaaatccttgatggagac  
1-8tRNA-Gly(tcc)c[69400,69473]  
gcggatatactataatggattacctcagactccaatctgatgatgtga  
gttcgattctcattatccgtcca  
1-9tRNA-Leu(taa)c[69479,69565]  
gcgagaatggtaaattggtaaaggcacagcacttaaaatgctgcggaat  
gatttccttgggttcgagtccttctcgacca

>KF208315.1 Yersinia phage PST, complete genome

1-1tRNA-Arg(tct)c[67617,67691]  
gtcccgtggtgtaatggatagcatatccttctaagttgcggtcct  
ggttcgatcccaggcgaggatacca  
1-2tRNA-Tyr(gta)c[68409,68495]  
ggggagttatcccgtagaggtagcgggtggactgtaaattcattgtcat  
tgcgactcaggtggttcgactccatcactccccacca  
1-3tRNA-Met(cat)c[68505,68581]  
ggccctgtagctcaatggtagcagcagtcctcataagggaaaggta  
ccagttcaaatctggtctgggtcacca  
1-4tRNA-Thr(tgt)c[68583,68658]  
gctgatttagctcagtaggtagagcacctcacttgtaatgaggatgtcgg  
cggttcgattccgtcaatcagcacca  
1-5tRNA-Ser(tga)c[68660,68748]  
tggaggcgtggcagagtgtttaatgcaccggtcttgaaccggcagtc  
gtccggcgactcataggtcaaactctatgcctccgt  
1-6tRNA-Pro(tgg)c[68749,68823]  
ctccgtgtagctcagtttggtagagcgtctgttgggagcagaatgtcg  
caggttcaaatcctgcccgagac  
1-7tRNA-Gly(tcc)c[68834,68907]  
gcggatatactataatggattacctcagactccaatctgatgatgtga  
gttcgattctcattatccgtcca  
1-8tRNA-Leu(taa)c[68913,68999]  
gcgagaatggtaaattggtaaaggcacagcacttaaaatgctgcggaat  
gatttccttgggttcgagtccttctcgacca  
1-9tRNA-Gln(ttg)c[69000,69073]  
tgggaattagccaagttgtaaggcatagcactttgactgctagatgcaa  
aggttcgagtcctttattccagc

>KM672662.1 Acinetobacter phage YMC13/03/R2096, complete genome

1-1tRNA-Tyr(gta)[16051,16136]  
gggtgatgtgggtgttggtcaacccatcagactgtaaactgacgtg  
aaagctgtctaggtcgaatcctagatcaccacca  
1-2tRNA-Ile(gat)[16140,16214]  
agtaccttagttcagggtagaacgcagaactgataattctgaggtcgat  
ggttcgaaaccatcaggtactacca

1-3tRNA-Asn(gtt)[16244,16317]  
tctagttagcacacggtagtagcagcagactgttaatctgttggtgtt  
ggttcgaatccagcctctagagcc  
1-4tRNA-Asp(gtc)[17058,17133]  
ggctctgtagcatagtggttatgcgcctccctgtctaggagaaaaacgc  
cagttcgagtcgtggtcagagtcgcca  
1-5tRNA-Gln(ttg)[17138,17212]  
tgtcgtatagtgtaatggtagcacagaagactttgactcttctagtta  
ggttcgagtcctaattcgactacca  
1-6tRNA-Ala(tgc)[17216,17287]  
gggtcactagcacaaatggtagtagcagttgctttgcaagcatcaggttaag  
ggttcgagtccttgtgtatcc  
1-7tRNA-Glu(ttc)[17294,17368]  
attccattcgactagcggtaggtcgcttcccttcaaggaagtagcacg  
agttcgaatctcgtatggaatacca  
1-8tRNA-Lys(ttt)[17371,17447]  
aggacgttagctcagttggttagagcaagagcctttaagttcgaggta  
taggttcaaalcctatagtcctacca  
1-9tRNA-His(gtg)[17454,17527]  
gtgactttggtgtaatggttgcacactccctgtgaaggagaaggtcag  
ggttcaaataccgaagtcacacca  
1-10tRNA-Val(tac)[18226,18301]  
agtccttagctcaatcgggagagcaacactcttacaaggtgaaggtagt  
aggttcgaaacctacaggactacca  
1-11tRNA-Ser(tga)[18303,18391]  
gggtggtagcgtcaaggtgacaaagcgggctgaaccccggtccaattgt  
gatgagcagttgagagttcgattctttacccatcgcca  
1-12tRNA-Gly(tcc)[18393,18466]  
gcgtttatagtgtagtgtaacaccctgtactccaattcagtatcttcg  
gttcgaatccgaatagacgtcca  
1-13tRNA-Pro(tgg)[18620,18696]  
ctctgttagctcagtttggttagagcactcgcttgggagtgaggggtcg  
taagttcaattcttactacagagacca  
1-14tRNA-Leu(tag)[18784,18860]  
gggtagttgaagggaatggcatacctttcacgcttagaacgtgaagttc  
tgattcgagtcagactacctacca  
1-15tRNA-Leu(taa)[18867,18942]  
gggatagtagcccaacggcagaggcaagaggttaaaccctctcaagtt  
cagttcgaatctgaataccctacca  
1-16tRNA-Thr(tgt)[19336,19411]  
gccgaattagctcagttggttagagcagcgacttgtaatgcgaaggtcgt  
agactcggattctacattcggcacca  
1-17tRNA-Met(cat)[19784,19858]  
agcgaggtagtgtaacggttgcacaggggactcataatcctctggttg

ggttcgaatccaacttcgctcca

>JX509734.1 Enterobacteria phage SfiI, complete genome  
 1-tRNA-Asn(gtt)[35738,35812]  
 gggtcagtcgtataaaggtcattacggaaggctgtaaccttctatcgt  
 ggttcgagtcacgctgtcccgcca  
 1-2tRNA-Thr(tgt)[35818,35893]  
 gctggtttagctccaatggtagagcggcgccttgaagcgaatgggtag  
 cggttcaagtccgttaaccgacacca

>JN641803.1 Salmonella phage SPN3US, complete genome  
 1-tRNA-Trp(cca)[1771,1846]  
 gggggatggcgcaattggtagcgaccggctcctccaaaaccgaaggttcg  
 aggttcgaaacctcgtgcccccgcca

>FN667789.1 Campylobacter phage CPt10, complete genome  
 1-tRNA-Arg(tct)[112367,112443]  
 cgggatgtagctcagctggatagagcgacagccttctaagccgtaggtca  
 aaggttcgagtcctttcatcccgacca  
 1-2tRNA-Tyr(gta)[112455,112540]  
 gtaagcattcgggtaattggtaacccaccagactgtaaatctggcgtctc  
 ttggcactgcaggttcgagtcctgctgttacacca

>GU169904.1 Staphylococcus phage SA1, complete genome  
 1-tRNA-Tyr(gta)[58449,58536]  
 gtgtcggtatcccgtagatggtagcgggtgggactgtaaatccctgtca  
 ttgagactcggtaggttcgactcctacacggcacacca  
 1-2tRNA-Asp(gtc)[58542,58618]  
 ggttatgtagttaatttggttaaaataccccctgtcacgggagatgatg  
 agggttcaaatcccttcgtaaccgcca  
 1-3tRNA-Lys(ttt)[59047,59122]  
 ggaagtgtagcagaatggtgatgcggcagacttttaatctgacaggcgat  
 gggttcgaatccctccactctacca  
 1-4tRNA-Met(cat)[59127,59203]  
 ggttcagtcgcagataaggtaatgcaagggtctcataagccctatgaatg  
 tgggttcgattcccatctgaacctcca  
 1-5tRNA-Ile(gat)[59206,59280]  
 tgtgggtagcataaatggtaatgcaaacggctgataaccgtagaagag  
 ggttcgataccctcacctacaacca  
 1-6tRNA-Arg(tct)[59617,59693]  
 gcacccttagttcaattggatagagcaacggctcttaaatcgtagtta  
 caggttcgaatcctgtaggggtgtacca  
 1-7tRNA-Ser(tga)[59932,60021]  
 ggtaggtagcggctaattggtagccaaactgtcttgaaaacagttgccact  
 gtagagatacggtaggggttcgactccttacttaccgcc  
 1-8tRNA-Leu(tag)[60278,60355]  
 gggagattgacggtaattggtaaacctaccatccttagaagttggtgtt  
 gagggttcgaatcccttgtctctacca

1-9tRNA-Lys(ctt)[60363,60438]  
gcaggtgtagcaaaatggttatgcggctgactcttcatcagtaagacgat  
gggttcaattccctccacctgtacca  
1-10tRNA-Ala(tgc)[60445,60520]  
ggggtcatagtttatatggttaaaatcgagtttgcaaacttgggaact  
gagttcaattctcagtactccacca  
1-11tRNA-Gly(tcc)[60527,60601]  
gcatccatagtttaaacgggaaaattacagtcttccaaactgaggttgag  
ggttcgattccctctggatgctcca  
1-12tRNA-Thr(tgt)[60609,60684]  
gctcctatcgataattggctattacggttgccttgaagcaacttatca  
gggttcgaatccttgtgggagcacca  
1-13tRNA-Val(tac)[60780,60854]  
actcgcttagtttatatggtaaaacatcaccttacaagatgaagaaaaa  
ggttcaagtcctttagttagtacca  
1-14tRNA-Leu(caa)[60856,60933]  
gttccagtatcccaattggcagaggatgcaagctcaaacctgtattagt  
gacggttcgaatccgtcttggaaacacca  
1-15tRNA-Arg(acg)[61048,61123]  
gcaggattagttcaaatggatagagcaacagtctacgaagctgtaatag  
gggttcgaatcccttatcctgcgcca  
1-16tRNA-Gln(ttg)[61947,62022]  
aggggattagtttacaaggttaaaacctcggtcttgaaatcgaagaagt  
tggttcaattccaacatccccctcca  
1-17tRNA-Leu(taa)[62025,62103]  
actccattactccaattggcagagaggccagacttaaaatctgtgttatg  
tatcggttcgaatccgatatggagtacca  
1-18tRNA-Gln(ctg)[62109,62184]  
agcggtatagcataactggcaatgcagcagctctgaagctgtctcatta  
aggttcaaatccttatgccgctgcca  
1-19tRNA-His(gtg)[62216,62291]  
gtggccttatcataaatggtaatgacccatgctgtgaacatggtctatac  
gggttcaaatccgtaggtcacccca  
1-20tRNA-Phe(gaa)[62298,62373]  
agtccaagtagcttatatggttaaagcgcgtgtctgaaaaacatgagaag  
agggttcaaatcccactggactacca  
1-21tRNA-Ser(gct)[63126,63218]  
ggaagattaaccctaaaaggtaaggagcagtttgctaaactgccagtag  
ctgagaaatcggtgtaccagttcaagctggtatcttctcca  
1-22tRNA-Cys(gca)[63223,63298]  
gaatccgtgacagaaatggctatgtgcctgtctgcaaacagggttataa  
gggttcaagtccttcggattctcca  
1-23tRNA-Pro(tgg)[146853,146929]  
ctctgttagctcagcttggtagagcgttccgttggggcggttaaggccg

gaggttcaagtctctccaacagagacca  
 1–24tRNA–Glu(ttc)[146937,147014]  
 gtccagtagacaaaatggtaaagtcaccactcttcaaagtgatatt  
 gagggttcaaatcccttctggaacgcca  
 1–25tRNA–Met(cat)[147105,147181]  
 tgcgggtatagagaaaggcgtctcacatgtctcattagcatggatcgg  
 caggttcgactcctgcacccgcctcca  
 >FN667788.1 Campylobacter phage CP220, complete genome  
 1–1tRNA–Arg(tct)[111946,112022]  
 cgggatgtagctcagctggatagagcgacagccttctaagccgtaggtca  
 aaggttcgagtccttcatcccgacca  
 1–2tRNA–Tyr(gta)[112034,112119]  
 gtaagcattcgggtaattgtaaccaccagactgtaaatctggcgtctc  
 ttggcactgcaggttcgagtcctgtgcttacacca  
 >AP011113.1 Enterobacteria phage AR1 DNA, complete genome  
 1–1tRNA–Arg(tct)c[68329,68404]  
 cggggcatagctcagaaggaagagcaaggaccttctaagtcctaggtcgt  
 aggttcgalccctactgcctcgacca  
 1–2tRNA–His(gtg)c[68409,68484]  
 gtggccgtagttcagttggtagaactcgagattgtgattctcgtagtc  
 gggttcgactcccatcggtcacccca  
 1–3tRNA–Asn(gtt)c[68598,68672]  
 ggatgttagctcaatggcagagcgatcgctgttaagcgattgggtata  
 ggttcgaatcctatcacgtccgcca  
 1–4tRNA–Tyr(gta)c[68677,68763]  
 ggggagttatccgtagaggtagcgggtgtggactgtaaatccattgtcat  
 tgcgactcgggtggttcgactccatcactccccacca  
 1–5tRNA–Met(cat)c[68777,68851]  
 ggcctgtagctggaaggttcaagcaagcgactcataatcgccagatggt  
 ggttcaattccacccagggccacca  
 1–6tRNA–Thr(tgt)c[68853,68928]  
 gctgatttagctcagtaggtagagcacctcacttgaatgaggatgtcgg  
 cggttcgattccgtcaatcagacca  
 1–7tRNA–Ser(tga)c[68934,69023]  
 ggaggcgtggcagagtggtttaatgcaccggtcttgaaaaccggcagtcg  
 ctccggcgactcataggttcaaactcctatcgctccgcca  
 1–8tRNA–Gly(tcc)c[69685,69758]  
 gcggatatcgataatggtattacctcagacttccaatctgatgatga  
 gttcgatttcattatccgctcca  
 1–9tRNA–Leu(taa)c[69764,69850]  
 gcgagaatggtaaattggtaaaggcacagcacttaaaatgctgcggaat  
 gatttccttgggttcgagtcacacttctcgacca  
 1–10tRNA–Gln(ttg)c[69851,69924]  
 tgggaattagccaagttgtaaggcactggattttgattccaggatgcaa

```

    aggttcgagtcctttattcccagc
>LN881727.1 Escherichia phage slur16, complete genome
    1-1tRNA-Pro(tgg)c[95063,95139]
    ctccgcgtagctcagcttggtagagcgctgattgggatcaggaggtcg
    agtttcgaatcactccgtggagacca
    1-2tRNA-Met(cat)c[95151,95225]
    ggccctgtagctggaaggtcaagcaagcgactcataatcgccagacggt
    ggttcaattccaccagggccacca
    1-3tRNA-Thr(tgt)c[95227,95302]
    gctgatgtagcacaattggtagtgaattgattgtaataataggttgc
    aggttcaagtcctgccatcagcacca
    1-5tRNA-Ser(tga)c[95506,95596]
    tgagggtaggagcaatggtgctcaagcggtcttgaataaccgtcccgttg
    aggatgactcgatgatggttcgattccattaccctcagcca
    1-6tRNA-Tyr(gta)c[95711,95797]
    ggggagttatcccgtagaggtagcgggtgtagactgtaaatctattgtcat
    tacgactcgggtggttcgactccaccactccccacca
    1-7tRNA-Arg(tct)c[95802,95876]
    gccctgtagcttagtgataaagcagcgcccttctaagccgttgacact
    ggttcgagtcagtacggggtgcca
>LN881736.1 Escherichia phage slur14, complete genome
    1-1tRNA-Arg(tct)c[12042,12117]
    cggggcatagctcagaaggaagagcaaggaccttctaagtcctaggtcgt
    aggttcgatccctactgcctcgacca
    1-2tRNA-His(gtg)c[12122,12197]
    gtggccgtagttcagttggtagaactcgagattgtattctcgtagtcatt
    gggttcgactcccatcggtcacccca
    1-3tRNA-Asn(gtt)c[12312,12386]
    ggatgtgtagctcaatggcagagcgatcgctgttaagcgattggttata
    gggtcgaatcctatcacgtccgcca
    1-4tRNA-Tyr(gta)c[12391,12477]
    ggggagttatcccgtagaggtagcgggtggactgtaaatcattgtcat
    tgcgactcgggtggttcgactccaccactccccacca
    1-5tRNA-Met(cat)c[12487,12561]
    ggccctgtagctggaaggtcaagcaagcgactcataatcgccagatggt
    ggttcaattccaccagggccacca
    1-6tRNA-Thr(tgt)c[12563,12638]
    gctgatttagctcagtaggtagagcacctcacttgtaatgaggacgtcgg
    cgggtcgattccgtcaatcagcacca
    1-7tRNA-Ser(tga)c[12645,12734]
    ggaggcgtggcagagtggtttaatgcaccggtcttgaataaccggcagtcg
    ctccggcgactcataggttcaaatcctatcgctccgcca
    1-8tRNA-Pro(tgg)c[12736,12810]
    ctccgtgtagctcagtttggtagagcgctgattgggatcaggaggtcc

```

aaggttcaaatccttgatggagac  
1-9tRNA-Gly(tcc)[12821,12894]  
gcggatatcgataatggtattacctcagactccaatctgatgatga  
gttcgattctcattatccgctcca  
1-10tRNA-Leu(taa)[12900,12986]  
gcgagaatgggtcaaattggtaaaggcacagcacttaaaatgctgcggaat  
gatttccttggtggttcgagtccttctcgacca  
>KT804923.1 Pseudomonas phage C11, complete genome  
1-1tRNA-Gln(ttg)[22320,22393]  
tgccgcttcgttcaatggtaggacgccagacttgaatctggagatgatg  
gttcgatcccatcagcggctgccca  
1-2tRNA-Arg(tct)[22705,22780]  
gctcatatagtgtaatggacagcacaacggcttctaagccgtaaggtct  
aggttcgaatcctagtatgagcgcca  
1-3tRNA-Lys(ttt)[22790,22865]  
tggacggaagctaaagtggatcagcatctggctttaaccagactatagt  
gagttcgagtctcaccgtccaacca  
1-4tRNA-Leu(tag)[23140,23224]  
ggcctgtggtggaattggtatacacatcagctctagaactgacgccga  
gaggattgaggggtcaagtcctccggggccacca  
1-5tRNA-Ile(gat)[23435,23510]  
agccgggtagctcaattggcagagcacccgaccgataatcgggtggttga  
aggttcaagtccttctctggctacca  
1-6tRNA-Asp(gtc)[23520,23598]  
ggccattagctcagctggactagagcaagcccctgtctagggaaggt  
cgtcgggtcgaatccgacatgggtcgcca  
1-7tRNA-Met(cat)[23699,23773]  
agcgftaagactggctggagctgtcactcggctcataaccgagcacaagt  
ggttcgattccactctcgctacca  
1-8tRNA-Cys(gca)[24055,24130]  
cccgcgttgccgagaggttaggcggcggttgcaaatccgtctcacat  
cggttcaaatccgatacgggtcca  
1-9tRNA-Asn(gtt)[24141,24218]  
tgggatgtagctcagttggtagagcaggagctgttaactctcaggacgg  
cagggttcgaaccctgccgtcctagcca  
1-10tRNA-Pro(tgg)[24281,24358]  
ctcctcgtagctcagctcgttagagtgctggatttggaaatccgaaggtc  
gaaggttcaaatccttcggggtgacca  
1-11tRNA-Gly(tcc)[24530,24605]  
gcgggtatagctcagttggtagagcgtctgcctccaagcagttcgtcgt  
cggttcgagtcctctatccgtcca  
1-12tRNA-Phe(gaa)[24612,24687]  
gcattgaagctaactaggtagaagcgtgggttgaaattccagaggact  
tggatcgttaccagcagatgcacca

1-13tRNA-Glu(ttc)[24694,24769]  
gcagttatagattaattgggttaaatacgcagactttcaatctggtgttcc  
gggttcgatccccggttaactgctcca  
1-14tRNA-His(gtg)[24830,24904]  
gtggagattgtgtagcccgatgctgccttcggtgtgacccgattgtt  
gggttcgagtcctcccaacc  
1-15tRNA-Thr(tgt)[25091,25165]  
gcccttaagcatttatggtgatgcaccgcttgaacccggcgaattc  
tgtcaagtcaggaatggggcacca

>AP014714.1 Edwardsiella phage PEi20 DNA, complete sequence

1-1tRNA-Asp(gtc)[75815,75890]  
ggacctatagtttcagcgggttaaatactcccctgtcacgggagcgtcac  
gagttcgaatctcgttaggtccgcca  
1-2tRNA-His(gtg)c[76114,76189]  
gtggccttaattcagttggtagaattcaagattgtattctgtagtcac  
gggttcaagtcctataggtcacccca  
1-3tRNA-Asn(gtt)c[76223,76298]  
ggatgttagctcagttggtagagcggtcgcccgttaagtattggtccg  
cgggtcgaatccgtgcacatccgcca  
1-4tRNA-Lys(ttt)c[76844,76921]  
aggacgttagctcagctggttagagcactcgactttaatcgagatgtcg  
atgggttcaaaccctcacgtcctacca  
1-5tRNA-Met(cat)c[77987,78063]  
ggcctatagctcaattggttagagcggcgctcataactggtaggttt  
ccggttcaagtcggatggggccacca  
1-6tRNA-Leu(taa)c[78529,78617]  
gcgggtgtggcggtattggcagtcgcatggcacttaaatgccataggg  
cttaagctctacgagttcgaatctcgtcacccgtacca

>KT353109.1 Cronobacter phage PBES 02, complete genome

1-1tRNA-Thr(tgt)[50654,50729]  
gctggattagctcagtaggtagagcgctcacttgaatgaggatgtcgc  
gggttcgattctcgtacccagcacca  
1-2tRNA-Cys(gca)[50736,50812]  
gcaacgttgcggagtctggtaacggctctcgtgcaaacgagatgagca  
ctggttcgaatccagtacgttgcctcca  
1-3tRNA-Leu(caa)[50814,50890]  
gcgtcttggccaattggttagaggcactacattcaaatgtaggggttc  
ccagttcgaatctgggaaggcgacca  
1-4tRNA-Tyr(gta)[51485,51571]  
gctgtgatagaccgtagggttagcgggcagactgtaaatctgctgttca  
tagaactcgggtggttcgactccatctcgcagcacca  
1-5tRNA-Ser(gga)[51579,51673]  
ggttaggatggctgagtggttaaacgagcatcttgaaaggtgtcggtcg  
tggtaacccacggccgagagttcgaatctctctctacctcca



1-6tRNA-Asn(gtt)[51844,51919]  
tgacggtgagcatatatggacatgcggggacctgttaagtcaggataac  
tggttcgaatccagtaccgtcagcca  
1-7tRNA-Glu(ttc)[51958,52035]  
gtcctggtagacaaacttggtaaagtcaccacccttcacggtggagttt  
gagggttcgatcccctctcaggacgcca  
1-8tRNA-Asp(gtc)[52130,52205]  
ggctctatggtatcagcggtaaactactgcctgtcacgcgagagtcac  
gggttcgaatcccgttaggaccgcca  
1-9tRNA-Ile(gat)[52210,52285]  
tggggattagctcagttggtagagcaggctcttgataagggtcaggtcac  
tggttcaagtcagatccccaacca  
1-10tRNA-Pro(tgg)[52356,52432]  
cgggtgatagcgcagctcgttagcgcgaatgcttgggagcattaggtcg  
ttggttcgagtcgaactacaccgacca  
1-11tRNA-Gly(tcc)[52470,52543]  
gcgggcatggtatagtggtgtgccttagcctccaagctaagtcg  
gttcgatcccggatgtccgctcca  
1-12tRNA-Gln(ttg)[52583,52658]  
tgggggctagttaattggtagaacagcgggtttgatcccgttagcgcg  
aggttcgaaccctccgccccggcca  
1-13tRNA-Ser(gct)[53125,53211]  
agaagagtggcgaaatcggtagcgcaccggactgctaaccggggtcct  
tcggggcctgagagttcaagtctctcctcttctgcca  
1-14tRNA-Phe(gaa)[53299,53374]  
ggaactgtagctcagttggtagagcggttgcctgaagagcagcgcgtcag  
cggttcaaatccgttcagttccacca

>KT239446.1 Klebsiella phage JD18, complete genome

1-1tRNA-Thr(tgt)c[57172,57247]  
gccgatttagctcagctggtagagcgttcacttgtaatgaagatgtcgc  
gggttcgactcctgcaatcggcacca  
1-2tRNA-Leu(taa)c[57348,57432]  
gcatcgatggtggaactggtatacacaggagactaaaatctcccggc  
aaggattgagggttcgaatccctctcgtgcacca  
1-3tRNA-Arg(tct)c[57437,57513]  
cggggcatagctcagttggtatagcagcggacttctaaccgcaggtcg  
aagggtcgaatccttctgcctcgacca  
1-4tRNA-Met(cat)c[58860,58936]  
ggcctgtagctcaattggtagagcgttcccctcataagggttggtgc  
atgttcgagctcttggcagggtcacca  
1-5tRNA-Pro(tgg)c[60204,60280]  
ctccgtatagctcagctcgttagagcgtccattgggatggagaggtcg  
aatgttcgagtcattctatggagacca  
1-6tRNA-Gly(tcc)c[60286,60360]

gcattccatcgatatagcggatattatgtctggctccaccagaagatggg  
agttcgattctccctggatgctcca  
1-7tRNA-Trp(cca)c[60366,60440]  
aggttcttagtataacggctattatgctgggctccaaaccagtgatgag  
ggttcgattccttcagggcctgcc  
1-8tRNA-Ile(gat)c[60447,60522]  
gggagtatagctcatttggtagagctctcgaccgataatcgagcggtag  
tggttcgagtcagttactcccacca  
1-9tRNA-Ser(tga)c[60589,60673]  
ggagagtagcgtagtggtagcaaaccggacttgaaatccgggccatcgg  
aaacggtgaggggtcaactccttactctccgcca  
1-10tRNA-His(gtg)c[60770,60845]  
gtggccgtagttcagttggtagaactcgagattgtgattctcgtagtcgc  
ggattcaaattccgccggtcacccca  
1-11tRNA-Gln(ttg)c[60942,61016]  
tggactatagacaagcggtaagtcaccggcctttgactccggtatctct  
ggttcgaatccagatagtcagcca  
1-12tRNA-Met(cat)c[61023,61099]  
tcggggtaacttcagttggtagaatgtgggctcatatcccacacgcg  
caggttcgagtcctgcctccgcctcca  
1-13tRNA-Asp(gtc)c[61261,61336]  
ggacctatagtttcagcgggtaaaatactgcctgtcacgcgagagtcac  
ggattcgaattccgtaggtccgcca  
1-14tRNA-Asn(gtt)c[61590,61674]  
gggtcgttggctgagagggttaagcgacggactgttaatccgtgtcagaaa  
tgactaggcaggttcgatacctgcacggcccgcca  
1-15tRNA-Lys(ttt)c[61680,61756]  
gggatactagctcagttggttagagcaccggacttttaatccgggtgtcc  
gaagttcgagtcctcggtgtccacca  
1-16tRNA-Tyr(gta)c[61763,61849]  
ggggagttagaccgtaggggtagcgggacagactgtaaatctgttctca  
aaaggctcgagtgttcgactccattactccccacca

>KT934943.1 Klebsiella phage vB\_KpnM\_KB57, complete genome

1-1tRNA-Phe(gaa)c[60892,60966]  
gcaactttgacatagacggatgtgtgctggcctgaaaagccagatagtca  
ggatcgttacctgaagttgcacca  
1-2tRNA-Leu(tag)c[60973,61049]  
gggcgattgatggaattggtatacgtgtcggatttagattccgaattttg  
ggggttcgagtcctctgcgcccacca  
1-3tRNA-Ala(tgc)c[61085,61160]  
ggggttatagtttatttgataaaattacaggctgcacctttagaact  
gagttcgattctcagtgactccacca  
1-4tRNA-Arg(acg)c[61164,61236]  
gtgggtgtcctgacggacaggcaacggtctacgaagccgttgatgtagg

ttcgagtccttccatccacacca  
1-5tRNA-Pro(tgg)c[61243,61319]  
ctccgtgtagctcaatagttagagcgctggttgggaccaggaggtg  
agtgttcgagtcactctatggagacca  
1-6tRNA-Asp(gtc)c[61464,61539]  
ggggatatggattagcggcaacatactggcctgtcacgccggagtcac  
gggttcgaatcccgttatcctcgcca  
1-7tRNA-Asn(gtt)c[61547,61631]  
gacgagctgggtcattggtagaacggcgactgttaatccgcgagcatta  
gtctatgtaggtcaattcctacgtcgtcgcca  
1-8tRNA-Lys(ttt)c[61692,61767]  
gggtaggtagccgagcggccaggcattgccttttaagcgaagagacgat  
gggttcaaatccctccctcccacca  
1-9tRNA-Ser(tga)c[61848,61940]  
ggaagatagggcgtagtgtacgcaaccagattgaaccctggcccatcg  
gggcgatccccgggtgatggttcgactccattatcttctcca  
1-10tRNA-Ser(gct)c[62023,62116]  
ggaagattaaccctaatacaggtlaaggatctcttgctaaagagacagta  
gtccgaaaggggtgtgcgagttcaagtcttgcattctccgcca  
1-11tRNA-Ser(gga)c[62278,62368]  
gggtggaatggtcgagaggtttaagacagcaccttgaaagggttagggccc  
ccaaaaggggtccgtaggttcgaatcctacttcaccgcca  
1-12tRNA-His(gtg)c[62454,62529]  
gtggccttaattcagttggtagaattcccgttgatccgggcagtc  
gggttcaagtcccataggtcacccca  
1-13tRNA-Gln(ttg)c[62590,62664]  
aggagattagccaagcggttacggcactggtcttgatatcagcatcgg  
ggttcgaatccaccatctcctgcca  
1-14tRNA-Trp(cca)c[62779,62855]  
agggacttagcacaactggctagtgcagcggattccaaatccgcagggtc  
tgggttcgaatcccagggtccctgcca  
1-16tRNA-Glu(ttc)c[63069,63144]  
gtcctatcggctaaatggacaggccgtcagacttcaatctggaaatcc  
gagttcgatcctcgggtgggagtgcca  
1-17tRNA-Ile(gat)c[63297,63371]  
gggggtatagttcagcggtagaacgctcgcataatcgagaggtctct  
ggttcgatcccagatactcccacca  
1-18tRNA-Tyr(gta)c[63378,63464]  
gcgtcgttagaccgtagggtagcgggacagactgtaaatctgttgctca  
aaaggctcgggtagttcgactctatcacggcgacca  
1-19tRNA-Cys(gca)c[63903,63976]  
gcacggttgctggagtggaacagcttcggctgcaaaccgaatgtcaggt  
gttcgattcacctaccgtgctcca  
1-20tRNA-Leu(taa)c[64182,64259]

tgcgtccttggccaatctggcagaggcatgggtgtaagccccagggt  
tcccgggttcgagtcgggagggcgcatc  
1-21tRNA-Ser(cga)c[64536,64610]  
ttctcgatagcttactttggtagagcgggtcccacgataggacggtaca  
ggttcgattcctgttcgagaagcca  
1-22tRNA-Thr(tgt)c[64617,64692]  
gctcgtatagctcagttggtagagcaactcccttgaaggagaaggctcgt  
gggttcaagtccactactcgagcacca  
1-23tRNA-Lys(ctt)c[66919,66994]  
ggggattaacacagcggtagttagcgcccttaagccgaaggctcga  
aggttcgaatccttcacgccccacca  
1-24tRNA-Met(cat)c[67460,67537]  
agccctcaagctcattaggtatgagcaatcgactcataatcgagaggttag  
gcaggttcgaatcctccgggggccacca  
1-25tRNA-Met(cat)c[67540,67612]  
cggtcagtagctcagttggtagagcaggttcttcacgacaaggctcag  
tgggtcaattccactctgaacga

>KP211958.1 Cyanophage P-TIM40, complete genome

1-1tRNA-Arg(tct)[171831,171905]  
tgattcagtagctcagtggtatagagcaactgtcttctaacagtcggtcgt  
ttggttcgaatccaacctgagtcgt

>KM434186.1 Pseudomonas phage vB\_PaeM\_PS24, complete genome

1-1tRNA-Asn(gtt)[24047,24123]  
tccgttcggctccctcaagtgaggagcttgactgttaatcaagacgtgc  
ctggttcgattccaggagcggagcca  
1-2tRNA-Tyr(gta)[24181,24268]  
ggaggggtggcagagcgggttaatgcaccggactgtaaatccggcgtccg  
accgggcatcgctggttcaaatccagccccctccacca  
1-3tRNA-Gln(ttg)[24470,24546]  
aggcgtgtggcgaaaaggttaacgcactggactttgactccagcatttg  
tgggttcgaatcccaccacgtctgccca

>KP890823.1 Proteus phage vB\_PmiM\_Pm5461, complete genome

1-1tRNA-Glu(ttc)c[63149,63223]  
acacccgtcgtctagtggttaaggacccctgccttcgagcaggttaaccgg  
agttcgaatctccgtgggtgtgccca  
1-2tRNA-Ser(tga)c[63229,63320]  
ggagagttgtcagagaggtttaatgagacggcttgaaaaccgttgggta  
ctggaaggtgctccatgggttcgaatcccatactctctcca  
1-3tRNA-Asp(gtc)c[63665,63740]  
ggcttattggtgtacctgggttaacatagttccctgtcacggaacagcacc  
gagttcgattctcggttaagaccgcca  
1-4tRNA-Gly(tcc)c[63940,64014]  
gcggccttggtatagcgggtattttctggcttccaccagaagatagg  
agttcaattctcctaggtcgtcca

1-5tRNA-Pro(tgg)c[64408,64484]  
ctgtacgtagcgcagctctggtagcgtaggtgcttggatgcatcgggtcg  
aaggttcgaatccttccgtacagacca  
1-6tRNA-Met(cat)c[64687,64762]  
ggccctctagcttactggtgaaagcgaacgcctcataagcgttggagca  
tggttcgattccatggtgggtcacca  
1-7tRNA-Tyr(gta)c[64768,64852]  
ggtatcgtagtctagcggcaatgacaggagactgtaaatctccaggcttc  
ggccttcggtagttcgagtctacccggtaccacca  
1-8tRNA-Arg(tct)c[64860,64936]  
gcacacttagctcagttggatagagcaaggaccttctaagccctaggtca  
caggttcgaatcctgtagtgttacca

>KT454805.1 Escherichia phage SUSP1, complete genome

1-1tRNA-Pro(tgg)[47552,47628]  
ctccgtttagctcagtttggtagagtgcgccgttggggcggtagagtcg  
aaggttcaatcccttcaacggagacca  
1-2tRNA-Glu(ttc)[47636,47713]  
gttcagtagacaaattggtaaagtcaccacactttcaatgtggagttt  
gagggttcaagtccttctggaacgcca  
1-3tRNA-Met(cat)[47797,47873]  
cgcggttatagagaaaggcgtctcacatgtctcattagcatggtatcgg  
caggttcgactcctgcacccgcctcca  
1-4tRNA-Asn(gtt)[47956,48032]  
ggtgaggaagcacataaggcatgtgcggtcggtgtaaccgaatggtat  
agggttcgaatccctaactcaccgcca  
1-5tRNA-Asp(gtc)[48197,48274]  
ggttatgtagtttaatctggttaaaatacctcactgtcactgaggaagat  
gagggttcaaatcccttcgtaaccgcca  
1-6tRNA-Lys(ttt)[48702,48777]  
gggggtgtagcagaaaggtagtcggcagacttttaatctgacaggcgac  
gggttcgaatccctccactcccacca  
1-7tRNA-Met(cat)[48782,48858]  
ggttcagtcgcagataaggtaatgaagggttcataagccctatgaatg  
tgggttcgaatcccatctgaacctcca  
1-8tRNA-Ile(gat)[48860,48935]  
gctggtatagttaagaaggttataacactcccctgataagggaacatcgg  
tggtcgattccactaccagtacca  
1-9tRNA-Arg(tct)[49213,49289]  
gcacccttagttcaattggatagagcaagtccttctaagcactgagtta  
caggttcgagtcctgtaggggtgtgcca  
1-10tRNA-Ser(tga)[50091,50180]  
ggtagatagcggctaattggaagccaaattgtcttgaaaacaattgccatt  
gtagtgatacggtaggggttcgactcctttatctaccgcc  
1-11tRNA-Leu(tag)[50422,50499]

gggagattgacggaattggtaaacctaccatccttagaagttggtgtt  
gagggttcgaatcccttgtctctacca  
1-12tRNA-Lys(ctt)[50507,50582]  
gcaggtgtagcaaaatggttatgcggctgactcctaatacagtaagacgat  
gggttcaattccctccacctgtacca  
1-13tRNA-Ala(tgc)[50589,50664]  
ggggttgtagtttaaatggttaaaacataagtttgcaaacttaagtaca  
gggttcgattccctgcttctccacca  
1-14tRNA-Gly(tcc)[50671,50745]  
gcatccatagtttaaacgggaaaattacagtcttccaaactgaggttgag  
ggttcgattccctctggatgctcca  
1-15tRNA-Thr(tgt)[50753,50828]  
gtcctatcgtataattggctattacggtgccttgaagcaactatca  
gggttcgaatccttgtgggagcacca  
1-16tRNA-Val(tac)[50925,50999]  
actcgcttagtttatacggtaaagcccatcctacaagttggtgaagaa  
ggttcaagtccttcagcgagtacca  
1-17tRNA-Leu(caa)[51002,51079]  
gttcagatcccaattggcagaggatgcaagctcaaacctgtattagt  
gacggttcgaatccgtcttggaaacacca  
1-18tRNA-Arg(acg)[51258,51334]  
gcagaattagttcaaatggatagagcagcagcctacgaagttgctgtta  
ggggttcgaatcccttattctgcacca  
1-19tRNA-Gln(ttg)[51920,51995]  
aggggattagtttacaaggttaaaacctcggtcttgaaatcgaagaagt  
tgggtcaattccaacatcccccgcca  
1-20tRNA-Leu(taa)[51998,52076]  
gtccattactccaattggcagagaggccagactaaaatctgtgttatg  
tatcggttcgaatccgatatggagtacca  
1-21tRNA-Gln(ctg)[52084,52159]  
agcagtgtagcataactggcaatgctccagcctctgaagctgaaagatta  
aggttcaaatccttacgctgctgcca  
1-22tRNA-His(gtg)[52191,52267]  
gtgccttatcataaatggataatgacctatgctgtgaacatggtctata  
cgggttcgattcccgtaggtcacccca  
1-23tRNA-Phe(gaa)[52276,52351]  
gggttaagtagcttatatggttaaagcgcgtgtctgaaaaacatgagaag  
agggttcaaatcccactaaccgcca  
1-24tRNA-Ser(gct)[53106,53198]  
ggaagattaaccctaaaaggtaagggaacagtttgctaaactgtcagtaa  
ccgagaaatcggcgtaccagttcaagctggtatcttctcca  
1-25tRNA-Cys(gca)[53206,53281]  
gcgtcgatgacagaaatggctatgtgcctgtctgcaaacaggattatga  
gggttcgactccctttcgacgtcca

>KT176190.1 Enterobacteria phage QL01, complete genome

1-1tRNA-Arg(tct)c[68858,68932]

gtcccgtggtgtaatggatagcatacgatccttctaagtttgcggtcct

ggttcgatcccaggcgaggatacca

1-2tRNA-Met(cat)c[68938,69014]

ggccctgtagctcaatggtagcagcagtcacctcataagggaaaggta

ccagttcaaatctggtctgggtcacca

>KR052482.1 Sinorhizobium phage phiN3, complete genome

1-1tRNA-Thr(tgt)c[82832,82915]

gccggtatagccaagcggcgaaggcacctgatttgaatcaggtattca

aacgtcggcagttcgaatctgtctaccggctcca

1-2tRNA-Gln(ttg)c[82916,82989]

ttgcccttagttcagttggtagaacgtcgaatttggtttcgaaggccg

tggttcgaatccacgagggaagc

1-3tRNA-His(gtg)[87863,87939]

tcatggatggtgtagtcaggtagcacgcggcactgtggatgccgaagca

taggttcaaactctattccatggacca

1-4tRNA-Asn(gtt)[96665,96738]

tggggtgtagctcagcggtagtagcgacggtctgttaaaccgtaggtcgt

aggttcgatccctacctccccagc

1-5tRNA-Met(cat)[96755,96831]

tgcgggtagtagcagtggttagctcgtctgcctcataagcagaaggta

tcagttcgaatctgatccccgaacca

>LN881726.1 Escherichia phage slur02, complete genome

1-1tRNA-Arg(tct)c[139969,140044]

cggggcatagctcagaaggaagagcaaggaccttctaagtcctaggtcgt

aggttcgatccctactgcctcgacca

1-2tRNA-His(gtg)c[140049,140124]

gtggccgtagttcagttggtagaactcgagattgtgattctcgtagtc

gggttcgactcccatcggtcacccca

1-3tRNA-Asn(gtt)c[140239,140313]

ggatgtgtagctcaatggtagagcgatcgctgttaagcgattggtata

ggttcgaatcctatcacgtccgcca

1-4tRNA-Tyr(gta)c[140318,140404]

ggggagttatcccgtagaggtagcgggtggactgtaaattcattgtcat

tgcgactcgggtggttcgactccaccactccccacca

1-5tRNA-Met(cat)c[140417,140491]

ggccctgtagctggaaggtcaagcaagcgactcataatgccagatggt

ggttcaattccaccagggccacca

1-6tRNA-Thr(tgt)c[140493,140568]

gctgatttagctcagtaggtagagcaactcacttgaatgaggacgtcgg

cggttcgattccgtcaatcagacca

1-7tRNA-Ser(tga)c[140575,140664]

ggaggcgtggcagagtggtttaatgcaccggtcttgaaccggcagtcg

ctccggcgactcataggttcaaactctatcgctccgccca  
1-8tRNA-Pro(tgg)c[140666,140740]  
ctccgtgtagctcagtttggtagagcgctgattgggatcaggaggtcc  
aaggttcaaactctgtatggagac  
1-9tRNA-Gly(tcc)c[140751,140824]  
gcggatatactataatgggtattacctcagactccaatctgatgatga  
gttcgattctcattatccgctcca  
1-10tRNA-Leu(taa)c[140830,140916]  
gcgagaatgggtcaaattggtaaaggcacagcacttaaatgctgcggaat  
gatttcctgtgggttcgagtccttctcgacca  
1-11tRNA-Gln(ttg)c[140917,140990]  
tgggaattagccaagttgtaaggcactggattttgattccagatgcaa  
aggttcgagtcctttattcccagc

>KP671755.1 *Vibrio* phage ValKK3, complete genome

1-1tRNA-Met(cat)[196346,196423]  
ggccctatagctcaacacggtagcaaccgactcataatcggtaggtt  
acaggttcgagtcctgttgggtcacca  
1-2tRNA-Pro(tgg)[198599,198672]  
cgggacgtggcgtaaaggtagcgttcgctttgggagcatgtgtaaga  
gttcgagtcctctcgccccacca  
1-3tRNA-Pro(tgg)[198682,198758]  
ccgtgactagctcaatctggtagagtactccgtttggggcgagaagtta  
agcgttcgaatcgcttgcacggacca  
1-4tRNA-Arg(acg)[198767,198842]  
gcccattagctcaattggaagagcagcgtcctacgaaggcgaaggttac  
aagttcgaatctgtattgggtgcca  
1-5tRNA-Leu(tag)[199390,199467]  
gcgcaagtagcccaatctggcagaggcactggcttagaaaccagaagtt  
aagattcgaatctcttcttgctacca  
1-6tRNA-Phe(gaa)[199469,199543]  
gcacccttagcttatcaggaaaagcggcgattgaagtcgccagtgctc  
ggttcgattccgaggggtgcacca  
1-7tRNA-Lys(ttt)[199632,199706]  
gggtcgttagtataacggtagtacatctggcttttaaccagaagggtgag  
agttcgaatctcttcgaccacca  
1-8tRNA-Lys(ttt)[199718,199794]  
gcgtcggtagctcatcatggaagacagggagcttttaactctcaggtgt  
ctggttcgagtcagagcggctacca  
1-9tRNA-Glu(ttc)[199858,199932]  
tctccgtggactaacggtaggtcatcacctttcaaggtgaagtcgcg  
agttcgaatctctcgggagaacca  
1-10tRNA-Tyr(gta)[199939,200024]  
ggagcgtacgtctcaaggtgagacaggggactgtaaatccctgaccctta  
acgggtagagaggttcgattcctctacgtccacca



1-11tRNA-Ser(tga)[200224,200309]  
gaaagattctgggtagcggcaacggcttggaaaaccgtcggtcaccggga  
ggtgatgttagggtcgaatccctagtcttccgcca  
1-12tRNA-Ile(gat)[200373,200446]  
agtcccttagctcaacggtagagcgtgcgaccgataatcgcttggtgaaga  
gttcgattctcttagggactacca  
1-13tRNA-Trp(cca)[200453,200526]  
aggggcatgatgtaaaggcagcatgacggattccaaacccgttcgtaga  
gttcgaatctctatgccctgccca  
1-14tRNA-Asn(gtt)[200601,200676]  
ggatcgctaactcaatggtagagtgcctgcctgttaagcgaggagtcc  
gagttcgagtctcggcggtccgcca  
1-15tRNA-Asp(gtc)[200746,200821]  
ggagccgaggtgtaaagggtgcatgtctccctgtcacggagaaggtagc  
gggttcgaaacccgtcggttccgcca  
1-16tRNA-Gln(ttg)[200841,200914]  
tggggattggtgtaaaggcagcataacgtactttgaatgcgttggtatca  
gttcgaatctgttatccccagcca  
1-17tRNA-Thr(tgt)[201044,201118]  
gctcctgaagcattgatggcgtgcagcggcttgttaaaccgcagaattc  
ggttcgattccgaacgggagcacca  
1-18tRNA-Arg(tct)[201840,201915]  
gcgctgttagctcaattggaagacacgtcccttctaaggatggggttat  
gagttcgaatctcatacggcgtgccca  
1-19tRNA-Met(cat)[202438,202513]  
ggtagcgtagctcaagtggcagagccacgctttcatacggcgaagatcc  
gatttcgagtatcggtgtcacctcca  
1-20tRNA-Gly(tcc)[202701,202774]  
gcgggtatgatgtaatggtagcatgacgtcctccaagtcgttcgtctcg  
gttcgagtcctgtaccgcgtcca  
1-21tRNA-Val(tac)[202781,202854]  
ggtcccttagtataatggcagtagctctctttacacagagaagaagtg  
gttcgattccactagggactacca  
1-22tRNA-His(gtg)[203270,203346]  
gtggcagtggtgaagtggaaatacccccgggtgtgattccggaagatg  
cgggttcgatccccgtctgtcacccca  
1-23tRNA-Cys(gca)[203359,203432]  
gctcgaatcgataatggcagtagacggattgcaaatccgcaggtcagg  
gttcgattccctgttcgagctcca  
1-24tRNA-Leu(taa)[203641,203717]  
gcgcacgtggccaattggcagaggcatgaggcttaaaatctcagggatg  
gcggttcgaatccggcgtgcgtacca  
1-25tRNA-Leu(caa)[203833,203909]  
gcccaactagccaattggcagaggcgtagtttcaaacactagatgatc

cgagttcgaatctcgggtgggcacca  
 1-26tRNA-Ser(gct)[204078,204166]  
 ggaagcatggtctaaaggtatgacagcacccctgctaaggtgctcgacgtt  
 aatagcgttctctgggttcgactcccagtgcttccgcc  
 >KR014248.1 Escherichia phage vB\_EcoM\_AYO145A, complete genome  
 1-1tRNA-Pro(tgg)[26382,26458]  
 ctctgttagctcagcttggttagagcgttccgttggggcggttaaggccg  
 gaggttcaagtctccaacagagacca  
 1-2tRNA-Glu(ttc)[26466,26543]  
 gtccagtagacaaaatggtaaagtcaccactcttcaaagtgatattt  
 gagggttcaaatcccttctggaacgcc  
 1-3tRNA-Met(cat)[26635,26711]  
 tgcgggtatagagaaaggcgtctcacatgtctcattagcatggtatcgg  
 caggttcgactcctgcacccgcctcca  
 1-4tRNA-Asn(gtt)[26789,26865]  
 ggtaggaagcacataaggtatgtcggtcgcctgtaagcgaatggcac  
 agggttcgaatccctgactaaccgcc  
 1-5tRNA-Tyr(gta)[26875,26962]  
 gtgtcggtatcccgtagatggtagcgggtgggactgtaaatccctgtca  
 ttgagactcggtagggttcgactcctacacggcacacca  
 1-6tRNA-Asp(gtc)[26969,27046]  
 gggtatgtagttaatctggttaaaatactcccctgtcacgggagatgat  
 gagggttcaaatcccttcgtaaccgcc  
 1-7tRNA-Lys(ttt)[27506,27581]  
 ggaagtgtagcagaatggtgatgcggcagacttttaatctgacaggcgat  
 gggttcgaatccctccacttctacca  
 1-8tRNA-Met(cat)[27586,27662]  
 gggtcagtcgcagataaggtaatgcaggggtctcataagccctatgaatg  
 tgggttcgattcccatctgaacctcca  
 1-9tRNA-Ile(gat)[27664,27739]  
 gctggtatagttaagaaggtataacactcccctgataagggaacatcgg  
 tgggtcgattccactaccagtacca  
 1-10tRNA-Ser(tga)[28308,28397]  
 ggtaggtagcggctaattggtagccaaactgtctgaaaacagttgccact  
 gtagagatacggtaggggttcgactccttacttaccgcc  
 1-11tRNA-Leu(tag)[28653,28730]  
 ggagattgacggtaattggtaaacctatctcgcttagaacgagatgttt  
 gagggttcgaatccctgtctctacca  
 1-12tRNA-Lys(ctt)[28738,28813]  
 gcagggttagcaaaatggttatgcggctgactcttaacagtaagacgat  
 gggttcaattccctccacctgtacca  
 1-13tRNA-Ala(tgc)[28820,28895]  
 ggggatgtagttttacatgggttaaacataagtttgcaacttaagtaca  
 gggttcaattccctgcttctccacca

1-14tRNA-Gly(tcc)[28902,28976]

gcatccatagtttaaacgggaaaattacagtcttccaactgaggttgag  
ggttcgattccctctggatgctcca

1-15tRNA-Thr(tgt)[28983,29059]

gctgctttcgataattggctattacacatccctgtgaaggatggaaatg  
caggttcgagtcctgtgagcagcacca

1-16tRNA-Val(tac)[29156,29230]

actcgcttagtttatatggtaaaacatcacccttacaagatgaagaaaaa  
ggttcaagccctttagtgagtacca

1-17tRNA-Leu(caa)[29232,29309]

gttcagtatcccaattggcagaggatgaagctcaaacctgtattagt  
gacggttcgaatccgtcttggacacca

1-18tRNA-Arg(acg)[29315,29390]

gcaggattagtcaaatggaaagagcaacagctctacgaagctgtaatatg  
gggttcgaatcccttatacctcgcca

1-19tRNA-Gln(ttg)[29976,30051]

aggggattagttacaaggttaaacctcggctttgaaatcgaagaagt  
tggttcaattccaacalcccccgcca

1-20tRNA-Leu(taa)[30054,30132]

gctccattactccaattggcagagaggccagacttaaaatctgtgtatg  
tatcgggtcgaatccgatatggagtacca

1-21tRNA-Gln(ctg)[30138,30213]

agcggatatagcataactggcaatgaacagctctgaagctgcctatta  
aggttcaaatccctatgccgtgcca

1-22tRNA-His(gtg)[30245,30320]

gtggccttatcataaaaggtaatgacccatgctgtgaacatggcttatac  
gggttcaaatcccgtaggtcacccca

1-23tRNA-Phe(gaa)[30327,30402]

agtccaagtagcttatatggttaaagcgcgtgtctgaaaaacatgagaag  
agggttcaaatcccactggactacca

1-24tRNA-Ser(gct)[31155,31247]

ggaagattaaccctaaaaggtaaggagcagtttgctaaactgccagtag  
ctgagaaatcggtgtaccagttcaagctggtatcttctcca

1-25tRNA-Cys(gca)[31252,31327]

gaatccgtgacagaaatggctatgtgcctgtctgcaaaacaggtttataa  
gggttcgagtccttcggattctcca

>HQ630627.1 Pseudomonas phage PhiPA3, complete genome

1-1tRNA-Ser(tga)c[294661,294749]

ggaagcgtggccgagtggtttaaggcacctgactgaaatcagacgggtc  
caaagggccctagagttcgaatctctgcgctccgcca

1-2tRNA-Thr(tgt)c[294861,294937]

gccgttatagctcagctggtagagcaactgacttgtaatcagtaggtcga  
cgggttcgaatccctctgacggcacca

1-3tRNA-Tyr(gta)c[299238,299317]

ttgatgtatagacagatggctactgtcaggggtctgtaacacccccgcct  
 aggctagaggttcaattccttcttcaacc  
 1-4tRNA-Asn(gtt)c[299475,299550]  
 tccggaatagctcagctggtagagcaacaagctgtaacttgggtcac  
 atgttcgaatcatgttccggagcca  
 1-5tRNA-Leu(taa)c[303149,303233]  
 gcccgaaatggcgtaaaggcagccgctgctgacttaaaatcagttgtcctt  
 gtgacgtgtgggttcgagtcaccttcgggtacca  
 >LN881732.1 Escherichia phage slur07, complete genome  
 1-1tRNA-Gln(ttg)[92843,92916]  
 tgggaattagccaagttggttaaggcactggattttgattccaggatgcaa  
 aggttcgagtcctttattcccagc  
 1-2tRNA-Leu(taa)[92917,93003]  
 gcgagaatgggtcaaattggttaaaggcacagcacttaaaatgctgcggaat  
 gatttccttgggttcgagtcaccttctcgacca  
 1-3tRNA-Gly(tcc)[93009,93082]  
 gcggatatcgataatggtattacctcagactccaatctgatgatgtga  
 gttcgatttcattatccgctcca  
 1-4tRNA-Ser(tga)[93744,93833]  
 ggaggcgtggcagagtggtttaatgcaccggtcttgaaaaccggcagtcg  
 ctccggcgactcataggttcaaactcctatcgctccgcca  
 1-5tRNA-Thr(tgt)[93840,93915]  
 gctgatttagctcagtaggtagagcacctcactgtaatgaggacgtcgg  
 cggttcgattccgtaatcagcacca  
 1-6tRNA-Met(cat)[93917,93991]  
 ggccctgtagctggaaggttcaagcaagcgactcataatcgccagatggt  
 gttcaattccaccagggccacca  
 1-7tRNA-Tyr(gta)[94004,94090]  
 ggggagtatcccgtagaggtagcgggtggactgtaaattcattgtcat  
 tgcgactcgggtggttcgactccaccactccccacca  
 1-8tRNA-Asn(gtt)[94095,94169]  
 ggatgtgtagctcaatggcagagcgatcgctgttaagcgattggttata  
 ggttcgaatcctatcacgtccgcca  
 1-9tRNA-Arg(tct)[94174,94249]  
 cgaggcatagctcagaaggaagagcaaggaccttctaagtcctgggtcgt  
 aggttcgatccctactgcctcgacca  
 >KT454806.1 Escherichia phage SUSP2, complete genome  
 1-1tRNA-Pro(tgg)[45779,45855]  
 ctccgttagctcagtttggtagagtgcgccgttggggcggtagagtcg  
 aaggttcaatcccttcaacggagacca  
 1-2tRNA-Glu(ttc)[45863,45940]  
 gttccagtagacaaattggtaaagtcaccacactttcaatgtggagttt  
 gagggttcaagtccttctggaacgcca  
 1-3tRNA-Met(cat)[46024,46100]

cgcggtatagagaaaggcgctcacatgtctcattagcatggtatcgg  
caggttcgactcctgcacccgcctcca  
1-4tRNA-Asn(gtt)[46183,46259]  
ggtgaggaagcacataaggcatgtgcggtcggctgtaaccgaatggtat  
agggttcgaatccctaactcaccgcca  
1-5tRNA-Asp(gtc)[46424,46501]  
ggttatgtagtttaatctggttaaaatactcccctgtcacgggagatgat  
gagggttcgaatcccttcgtaaccgcca  
1-6tRNA-Lys(ttt)[46930,47005]  
gggagtgtacgagaatggtgatgcggcagacttttaatctgacaggcgac  
gggttcgaatccctccactcctacca  
1-7tRNA-Met(cat)[47012,47088]  
ggttcagtcgagataaggtaatgcaagggttcataagccctatgaatg  
tgggttcgaatcccatctgaacctcca  
1-8tRNA-Ile(gat)[47094,47170]  
gttgggaaagctcatatggatgtagcactcggctgataaccgagaggcag  
agggttcgaatccctctcctaacacca  
1-9tRNA-Arg(tct)[47447,47523]  
gcacccttagttcaattggatagagcaagtccttctaagcactgagtta  
caggttcgagtctgtagggtgtgcca  
1-10tRNA-Ser(tga)[48056,48144]  
ggaaggtggcgagcaacggcgctcaactagtcttgaactagggtgct  
cagagatgggtaagggttcgaatccttcactttccgcca  
1-11tRNA-Leu(tag)[48384,48461]  
gggagattgatgtaattggtaaacctatctcgcttagaacgagatgtt  
gagggttcgaatcccttgtctctacca  
1-12tRNA-Lys(ctt)[48469,48544]  
gcaggtgtagcaaatggttatgcggctgactcttaacagtaagacgat  
gggttcaattccctccacctgtacca  
1-13tRNA-Ala(tgc)[48551,48626]  
ggggatgtagttacatgggtaaaacataagtttgcaacttaagtaca  
gggttcaattccctgcttctccacca  
1-14tRNA-Gly(tcc)[48633,48707]  
gcatccatagtttaaacgggaaaattacagtcttccaaactgaggttgag  
ggttcgattccctctggatgctcca  
1-15tRNA-Thr(tgt)[48714,48790]  
gtcgtttcgataattggctattacacatcccttgaaggatggaaatg  
caggttcgagtcctgtgagcagacca  
1-16tRNA-Val(tac)[48890,48964]  
actcgcttagtttataggtaaagcccatccttacaagttggtgaagaa  
ggttcaagtccttcagcgagtacca  
1-17tRNA-Leu(caa)[48967,49044]  
gttcagtatcccaattggcagaggatgcaagctcaaacctgtattagt  
gacggttcgaatccgtcttgaacacca

1-18tRNA-Arg(acg)[49223,49299]  
gcagaattagttcaaatggatagagcagcagcctacgaagttgcttgta  
ggggttcgaatcccttattctgcacca

1-19tRNA-Gln(ttg)[49885,49960]  
aggggattagtttacaaggttaaacctcggctttgaaatcgaagaagt  
tggttcaattccaacatccccgccca

1-20tRNA-Leu(taa)[49963,50041]  
gctccattactccaattggcagagaggccagacttaaaatctgtgttatg  
tatcgggtcgaatccgatatggagtacca

1-21tRNA-Gln(ctg)[50049,50124]  
agcagtgtagcataactggcaatgctccagcctctgaagctgaaagatta  
aggttcaaatccttacgctgctgccca

1-22tRNA-His(gtg)[50156,50232]  
gtggccttatcataaatggataatgacccatgctgtgaacatggctcata  
cgggttcgattcccgtaggtcacccca

1-23tRNA-Phe(gaa)[50241,50316]  
gggttaagtagcttatatggttaaagcgcgtgtctgaaaaacatgagaag  
agggttcaaatcccactaaccgccca

1-24tRNA-Ser(gct)[51071,51163]  
ggaagattaaccctaaaaggtaagggaacagtttgctaaactgtcagtaa  
ccgagaaatcggcgtaccagttcaagtctggatcttctcca

1-25tRNA-Cys(gca)[51171,51246]  
gcgctgatgacagaaacggctatgtgcctgtctgcaaacaggattatga  
gggttcaactccctttcgacgtcca

>KR869820.1 *Citrobacter* phage IME-CF2, complete genome

1-1tRNA-Gly(tcc)[69604,69679]  
gcaggtatagttcaattggtagaatatctggcttccatccagaatgttga  
gggttcgagtcctttacgtctcca

1-2tRNA-Met(cat)[69685,69761]  
ggcccttttagctcaattggtagagcgaacccctcataagggtgtggttgc  
cgggttcgaatcggggaggggccacca

>JX306041.1 *Stenotrophomonas* phage IME13, complete genome

1-1tRNA-Arg(tct)[64250,64326]  
ggtctcttagctcagttggatagagcagcggccttctaagccgagggtca  
ttggttcaaatccaatagggaactgccca

1-2tRNA-Met(cat)[65607,65682]  
ggccctctgcacagctctgaatgtgtccagctcataactgggtaaggc  
gggttagattcccgcgagggccacca

1-3tRNA-Met(cat)[65885,65961]  
tgcgatgtagaggagaggtcgtcctcgtcgggtcatatcccgaaaatcg  
gcagttcgaatctgtccgtcgttcca

1-4tRNA-Asp(gtc)[65974,66047]  
ggagccatagtttatttggttaaatagtcacctgtcacgggtcagcacc  
gagttcgatcctcgggtggctccgc

1-5tRNA-Ser(gct)c[66125,66212]  
ggagaagtggatgagcggctgaaatcgcttccctgctaaggaagtaaacc  
gaaaggtttcgagagttcgaatctctcttctccgcca  
1-6tRNA-Ile(gat)c[66220,66295]  
agtggattagctcagtaggtagcactcgaccgataatcgagagcgc  
tggttcgatcccaataatccactacca  
1-7tRNA-Trp(cca)c[66298,66373]  
atgacattgggttagcggtagcatgccggtctccaaaaccgtgcggcca  
gggttcgaatccttgatgcatgcca  
1-8tRNA-Thr(tgt)c[66738,66813]  
gccggttagctcatttggtagagcacttcactgtaatgatgggtggt  
ccgttcgaatcggacaaccggcacca  
1-9tRNA-Pro(tgg)c[67071,67148]  
ccgtgtgtaggctagtcaggttaggtcgtctggttggggtcagaaagtc  
gaaggttcgaatcctccacacggacca  
1-10tRNA-Gly(tcc)c[67393,67468]  
gcgatattagctcagttggtagagcttctgattccaatcagaatgcat  
cgggtcgagaccgatatatcgctcca  
1-11tRNA-His(gtg)c[67481,67555]  
gtgacctagtagtaatggttagctatcctggatgtgaccaggagtag  
gggttcaaatcccgtaggtcacccc  
1-12tRNA-Lys(ttt)c[67754,67828]  
gcgccgtagcttagtggttaaagcaagggacttttaatcccagagcgaa  
ggttcgagtccttctcggcgtaacca  
1-13tRNA-Tyr(gta)c[67858,67940]  
ggaacgttcgggtaatggtatccaagcggctgaacccgctcgcctctg  
gcattcttggttcgagtcgaaggcgttcacca  
1-14tRNA-Asn(gtt)c[68537,68613]  
ggttgattagctcagttggttagagcggcggactgttaacccgagggtct  
cccgttcgagtcgggaatcaaccgcca  
1-15tRNA-Ser(tga)c[68782,68875]  
ggaagattggcccagttggtttaaggcaccggcttgaaaaccggcgat  
cgtaggaatacggatccatccgttcgaatcgatattcttctcca  
1-16tRNA-Leu(taa)c[69068,69152]  
gcaagtatggtggaattggtatacactggaggcttaaaacctccgcctt  
cgggattgtgggttcgagtcctactactgcacca

>KT281790.1 Mycobacterium phage HyRo, complete genome

1-1tRNA-Ser(gct)[30120,30203]  
ggagggtgagcatctggtgatgcagggtcctgctaaggccctacggatt  
cacaccctgagtttcgattactcctccctccgc  
1-2tRNA-Leu(cag)[30300,30376]  
gccctgctgagcaactggcaagctgccgattcagagtgcgggtcatt  
tccgggttcgactcccgggcagggtac  
1-3tRNA-Leu(gag)[30496,30570]

gtctctgtaggcaaatcgaaaagccgcatcttgagggggtggtgcgtg  
cgggttcgactccccccagagacac  
1-4tRNA-Leu(caa)[30571,30644]  
gccgtggtaggccatctggcgagccgccagttcaagtttcggtgttgc  
gggttcgaatcccccccacggtac  
1-5tRNA-SeC(tca)[67440,67536]  
attctggcactggtggcgagcccaccggcgagcttcaagctgtcgt  
ggccggagaatcgaccgaaacatcccgttcaacgcgacccagggcc  
1-6tRNA-Pro(tgg)[90954,91028]  
cggggtgtagttcagtttgaagagcgttggttgggaccaagtgtcg  
caggttcgaatcctgtcaccgccac  
1-7tRNA-Trp(cca)[91043,91113]  
gggtctgtgcacagggtccccgacggtctccaaagccgaaggcgggggtt  
cgattccctccaggcctgcca  
1-8tRNA-Pyl(cta)[92250,92323]  
tgcgagatcgtgcacggcgactaggagcttcaacctccgactcgcgg  
gttcgactcccccatctcgacccc  
1-9tRNA-Met(cat)[92472,92546]  
agcggtagtagcagctaggtagctcgccgggctcatgaccgaggagc  
cgtgttcgattcacgccaccgccac  
1-10tRNA-Cys(gca)[92674,92745]  
gcgccttggcggaatggctacgtgctcggtgcaacccgagttatccc  
gttcgactccgggaggcgctc  
1-11tRNA-Glu(ctc)[92813,92884]  
gtccccatgggtagtggttaacctcctggttctcagccaggcgtccga  
gttcgatcctcggtaggtgc  
1-12tRNA-His(gtg)[92939,93012]  
gtgtagtagttcagatggaagaacgtcgcttgtgacggcgaaggtcgg  
gggttcgaagcccctctatcacc  
1-13tRNA-Ala(tgc)[93176,93249]  
gggcctatagctcatctggtagagcgctgccttgcaagcaggaggcgcc  
aggttcaagtcctgttaggtccac  
1-14tRNA-Phe(gaa)[93439,93511]  
gccgtcatagctcagttggtagagcactggcctgaaaaccagtgccga  
ggttcgattcctcgtgtcggcac  
1-15tRNA-Val(cac)[93517,93590]  
gtccgttagctcagctggaagagcgctcggccacacccgagaggccgc  
aggttcgatccctgcaatggacac  
1-16tRNA-Lys(ctt)[93712,93785]  
gccttcgtagctcagttggtagagctctcgctcttaagcgagatgtcgc  
aggttcgaccccctgccggaggcac  
1-17tRNA-Glu(ttc)[93790,93866]  
ggtcgggtcggctgctggtatggccagtcggattttcactccggacatt  
cgcgggttcaattcccgtcccgatcgc



1-18tRNA-Gly(tcc)[93946,94018]  
gcgggtgtggccgaatggctcaggcaccagactccactctggctaagca  
ggttcgattcctgtcatccgctc  
1-19tRNA-Thr(cgt)[94079,94153]  
gctgctgtagctcacctggcagagcgtcggcgtcgtatcccgaaggcatc  
cggttcgagtcggacagcagccccc  
1-20tRNA-Thr(tgt)[94154,94226]  
gcctctgtgtccagcggcacggacatccgccttgaagcggaggacccc  
cggtcgatccgggtagaggctc  
1-21tRNA-Thr(ggt)[94634,94706]  
gctgggtagctcagtggtagagcgttcctctggtatgggaaaggcccg  
ggttcaatccccgactcagctc  
1-22tRNA-Gly(gcc)[96029,96102]  
gcgaaggtagctcagctggcagagcggcaccttgccaaggaggagtcgc  
gggatcgtaacccgttcttcgctc  
1-23tRNA-Asp(gtc)[96106,96178]  
ggccctgtagctcagaggaagagcaccgcctgtcagcgggaggtcgcg  
gtatcgtaatccgtcagggtcgc  
1-24tRNA-Met(cat)[96238,96310]  
gcctcactagctcattggtagagcgcctcgtcataacgtgcaggtacct  
ggttcgattccagggtgaggtac  
1-25tRNA-Ile(gat)[96316,96390]  
gcctgttagcggactggtcgtccgatccaagctgataactggcgtaaagc  
ggtgttcgattaccgagcaggtac  
1-26tRNA-Arg(acg)[96484,96556]  
gcctctatggtccaacggagatgacgccggtctacggaaccggagatcgc  
tgttcgattcgcgctaggggcac  
1-27tRNA-Val(gac)[96599,96671]  
gtccgtgtagctcagggtagagcgcctgctcgacacgcaggaggaccga  
ggttcgaaacctcgcatggacac  
1-28tRNA-Arg(ccg)[96766,96835]  
gtcctcgtgacggactctgccctggccctccggaggccgggtgggtggt  
tcgactccacccggggacac  
1-29tRNA-Arg(cct)[96843,96916]  
gcctctgtagctcaacggacagagcaacgcggtcctaacgcggtggctgg  
aggttcgaatcctctcggaggcac  
1-31tRNA-Gln(ttg)[97437,97512]  
tggggtatggtggcaatctggcagtcgcccggttctgactccggaggt  
gcaggttcgagtcctgctaccccatc  
1-32tRNA-Arg(tct)[97516,97591]  
gccctgtagctcagtggaagagcggcgagcttctacctcggggccgg  
gagttcgaatctctccagggcacca  
1-33tRNA-Gln(ctg)[125143,125217]  
tgctcgttggtgtaactggcaacactacggactctggctccgtcattctt

ggttcgaatccaggcgagcaacca  
1-34tRNA-Asn(gtt)[125224,125299]  
tggtgtgtccgttaatcaggcaaacgagcggactgtaatccgtccctgc  
aggttcgaatcctgccaccccagcca  
>KF835987.1 Pectobacterium bacteriophage PM2, complete genome  
1-1tRNA-Gly(tcc)c[71819,71894]  
gcatccatcgataatggcttattatgactggctccaccagtagatga  
ggtttcgattacctctggatgctcca  
1-2tRNA-Trp(cca)c[73340,73413]  
aggttcttagtataatggtattaccgtgagctccaacctcattgatgtgg  
gttcgattcctacaggcgctgcca  
1-3tRNA-Ser(tga)c[73735,73826]  
ggaagattggtagagaggctaattacacctgactgaaatcaggaggccg  
aagaaattcgggtccgagggttcgaatcctcatcttcgcca  
1-4tRNA-His(gtg)c[73831,73906]  
gtggccgtagttcagttggtagaacctccgattgtgattcggaatgtcac  
ggattcaaattccgtcggtcaccca  
1-5tRNA-Gln(ttg)c[74004,74079]  
tggtgattatccaagttgtaaggcctaggactttgaatcctatatgcag  
aggttcgagacctctatccccagcca  
1-6tRNA-Met(cat)c[74090,74166]  
tcgggttaacttcagttggtagaatgtaggtcatatcctaataatgcg  
tcggttcgagtcggcacccgcctcca  
1-7tRNA-Asn(gtt)c[74762,74846]  
gggtcgttggtcgtgagagggtaaagcgacggactgtaatccgtgtcagaaa  
tgactaggcaggttcgatacctgcacggcccgcca  
1-8tRNA-Ile(gat)c[74851,74925]  
tgctcatagctcagtggtagagcagtcgcccataagcgattggctcgt  
ggttcgaatccggctgaagcaacca  
1-9tRNA-Pro(tgg)c[74942,75019]  
ccgtgtgtagcgcagcttggtcagcgtaggagctttggatgcttcgggtc  
gttggttcgaatccaaccacacggacca  
1-10tRNA-Tyr(gta)c[75027,75107]  
gtgggattagccaagtgggtcgacggcgtctgactgtaaatcagatatatta  
cacgggtggttcgaatccaccatcccacacca  
1-11tRNA-Arg(tct)c[75397,75471]  
gccctcatagttaaattggatataacaggaccttctaagtcctagttcca  
agttcgattcttggtgaggtacca  
1-12tRNA-Met(cat)c[75475,75549]  
ggcccttagctcagaggtagagcaggcaactcataattgctcggctcgt  
ggttcgaatccggcaagggtcacca  
1-13tRNA-Leu(taa)c[75560,75647]  
ccggatgtggtgattggcagtagcacacgggatttaaaatcccacagag  
gtttcctcttacgagttcgaatctcgtcatccggacca

>KC954775.1 UNVERIFIED: Cronobacter phage S13, complete genome

1-1tRNA-Leu(taa)[118148,118224]  
gcgacgtagcccaattggcagaggcacatcacttaaatgatgaaagt  
cgggttcgaatcccagcgtctacca  
1-2tRNA-Leu(caa)[118229,118305]  
gctcgcgtgacgcaattggcagacgtgccctctcaaaaggggaatgttg  
agagttcgagtctctccgcgacacca  
1-3tRNA-Met(cat)[118726,118801]  
ggtccttagcacaaggctagtgcgccaactcataattggaacgatgt  
gggttcgaatcccacggggaccacca  
1-4tRNA-Lys(ttt)[120360,120436]  
cggtcattagctcaacggttgagagcaatcgacttttaacgatagttt  
agggttcgaatccctaatgaccgacca  
1-5tRNA-Glu(ttc)[120551,120626]  
atcccatctgactaatggtcaggtcgtcacccttcaagtgaggtag  
gagttcgaatctcgatgggatacca  
1-6tRNA-Tyr(gta)[120635,120719]  
gcgtcgttggcagaatggctattgcagcggactgtaaatcgccctcttc  
ggagattcctagttcgagtctaggacggcgacca  
1-7tRNA-Asp(gtc)[120840,120916]  
ggtcgtgtagtttagatggtgaaaataccgcctgtcacgtgggagatcg  
cgagttcgatcctcgtcacgaccgcca  
1-8tRNA-Pro(tgg)[121000,121077]  
ccgtgcgtagctcagtcgtcagagtcaccgttggggcggtgatgtc  
gagagttcaaatccctccgcacggacca  
1-9tRNA-Asn(gtt)[121315,121389]  
ggaccattagctccaacggttagagcggggacctgttaagtcacggctg  
ggagttcaaatctctcatggtcgc  
1-10tRNA-Leu(tag)[121651,121728]  
gggtatgtggcgcaatctggcagacgcgtcggctctagaaccgaatgtt  
gagagttcgagtctctcataccacca  
1-11tRNA-Arg(acg)[122018,122093]  
gcagatatagcttaattggataaagccccagcttacgaatctggtgaattt  
gagttcgagtctcaatatctgtcca  
1-12tRNA-Gly(tcc)[122095,122170]  
gcggtagtaactcagttggtagagtgccgtcctccaagtcggatgtcgc  
gagttcgaatctcgtctgccgtcca  
1-13tRNA-Phe(gaa)[122642,122714]  
gggtccttagcttaaatgggaaagcgggtgattgaagatctccagttcac  
ggttcgattccgtggggaccac  
1-14tRNA-Ala(tgc)[122727,122802]  
gggcgtgtagctcaattgggagagcaactgcttgcagcagaagggtga  
gggttcgagtccttctgtccacca  
1-15tRNA-Gln(ttg)[122809,122883]

tgggatatcgtataatggtagtacatcggccttgactccgatagcgga  
 agttcgactcttctatcccagcca  
 1-16tRNA-Trp(cca)[122991,123066]  
 aggagcatagtttaacaggcgaaaatttcggtctccaaaaccgacgttct  
 gagttcgaatctcagtgctcctgcc  
 1-17tRNA-Cys(gca)[123077,123152]  
 gcctgggtacccgagaggttaaggcgcggttgcaaatccgttgctgcgt  
 cagttcgaatctgactccaggctcca  
 1-18tRNA-Ile(gat)[123154,123230]  
 agtcccgtagctcagttggccagagcaaacgaccgataatcgttggtgca  
 cgcgttcgaatcgcgtcgggactacca  
 1-19tRNA-Arg(tct)[123238,123314]  
 gcttcgtagctcaaccggatagagcatcggcttctaaaccgagggtta  
 tgtgttcgagtcacatcgtgagtacca  
 1-20tRNA-Met(cat)[127251,127324]  
 tgcgcggtagtgaaatggatcatttgggggtcataaccctaagtggaa  
 gttcgaatcttcctgcgcatcca  
 1-21tRNA-Met(cat)[127327,127402]  
 ggtgaattagctcaactggcagagcacgtccttcatacggatgaggttat  
 gagttcgaatctcatattcacctcca  
 1-22tRNA-His(gtg)[127435,127511]  
 gtggccaaagcctttatctggatgaggttcgacctgtgacgtcgaggaag  
 agggttcgattccctctggtcacccca  
 1-23tRNA-Ser(tga)[127516,127609]  
 ggagagttggcagagtttggttattgcacctgacttgaaatcagacgat  
 cccctaaaaagggtccgtgggttcgaatccacactctcctcca  
 1-24tRNA-Thr(tgt)[127757,127832]  
 gctcctatcgtataactggctattacggctgacttgtaatcagcttatca  
 ggggttcgagtccttggtgggagcacca  
 1-25tRNA-Ser(gct)[135021,135109]  
 ggtgagttgtccgaatggtaaggaagcggattgctaaccgtagatcgtc  
 tctgacggctgagagttcaggtctctcactcaccccca

>KP007360.1 Enterobacteria phage vB\_EcoM\_VR20, complete genome

1-1tRNA-Arg(tct)c[69911,69987]  
 cgggggtgtagtcaattgtatagagcaacggcttctaaaccgtaggttg  
 tgggttagaatcccaccaccccgacca  
 1-2tRNA-Met(cat)c[69989,70063]  
 ggccctgtagtcaattggtagagcatccggctcataactggcaggttt  
 ccggttcaagtcggatggggccac

>KT736033.1 Pseudomonas phage K8, complete genome

1-1tRNA-Gln(ttg)[22297,22370]  
 tgccgcttcgttcaattggtaggacgccagacttgaatctggagatgatg  
 gttcgatcccatcagtggtgccca  
 1-2tRNA-Arg(tct)[22576,22650]

gctcgtatagttaacggatgcacaacggtcttctaagccgtaaggtcta  
 gggtcgaatcctagtagagcgcca  
 1-3tRNA-Lys(ttt)[22658,22734]  
 tggacggaagctaagtggaatgagcatctggctttaaccagattatag  
 tgagttcgagttcaccgggtcaacca  
 1-4tRNA-Leu(tag)[23009,23093]  
 ggccctgtggtggaattggtatacacatcagtccttagaaactgacgccga  
 gaggattgagggtcaagtcctccggggccacca  
 1-5tRNA-Ile(gat)[23304,23379]  
 gccagatagctcaattggtagagcaccgaccgataatcggtggtga  
 aggttcaagtccttctctggccacca  
 1-6tRNA-Asp(gtc)[23389,23467]  
 ggcattagctcagtcctggactagagcaagcccctgtctagggaaggt  
 cgccggtcgaatccggcatgggtcgcca  
 1-7tRNA-Cys(gca)[23724,23799]  
 ccctcgttggccgagaggatcaggcagcagattgcaaatctgccatacat  
 cggttcaaatccgatacagagctcca  
 1-8tRNA-Asn(gtt)[23809,23885]  
 tccgtacggcccatcaaggcgatggggtcggctgtaaccgaaacgcgc  
 taggttcgattcctaggtacggagcca  
 1-9tRNA-Pro(tgg)[23948,24025]  
 ctctcgtagctcagtcctggttagagtcggatttggaatccgaaggtc  
 gaaggttcaaatccttccgggtgacca  
 1-10tRNA-Gly(tcc)[24033,24109]  
 gcgggtttcgtatagctggttattattcttggttccaccaagagact  
 aggggtcgaatccctaagccgcacca  
 1-11tRNA-Phe(gaa)[24172,24247]  
 gcgtctgaagctaactaggtagaagcgctgggttgaaattccagaggact  
 tggatcgttaccagcagatgcacca  
 1-12tRNA-Glu(ttc)[24254,24329]  
 gcagttatagattaattggttaaatgccagactttcaatctggtgtcc  
 gggttcgatccccgtaactgctcca  
 1-13tRNA-His(gtg)[24390,24464]  
 gtggagattgttagcccgatgctgccttcggtgtgacccgattgtt  
 ggggttcgagtcctccctccaacc  
 1-14tRNA-Thr(tgt)[24651,24725]  
 gccctttaagcatttatggtgatgcaccgcttgaacccggcgaattc  
 tgttcaagtcaggaatggggcacca

>KT224359.1 Bacillus phage TsarBomba, complete genome

1-1tRNA-Cys(gca)[26558,26631]  
 gaaggtgtaccgaagtggcttaacgggctaggttgcaaccctagtgtctcg  
 tgggttcgaatcccaccatcttct  
 1-2tRNA-Asn(gtt)[26645,26719]  
 gtcctgtagcgtagcgtagcgcagcagcctgtaagctgttggtcgg

ggttcgaatccaccaggagcgcca  
1-3tRNA-Ser(gct)[26724,26814]  
ggagagttgtcagatggcttatcgtgcctgtttgctaaataggtgtacg  
tccttaacgtaccacaggttcaaatcctgtactctccgcca  
1-4tRNA-Gly(tcc)[27005,27080]  
ggggcattagtatatcggttcattatcctggctccaaccaggggaggt  
cggttcgattccgacatgtccctcca  
1-5tRNA-Thr(tgt)[27085,27160]  
gccttcttagctcagttggtagagcgattgacttgtaatcaataggtcgt  
gggttcgaatcctacagtcggcacca  
1-6tRNA-Asp(gtc)[27166,27238]  
tggggtattagtttagtggtaaaatactgcactgtctatgcagagtcagg  
ggttcaactcccctataacctgt  
1-7tRNA-Glu(ttc)[27367,27440]  
ggggattggtgaagtggtcaaacacatccgactttctatcgagatacg  
agggttcgaatcccttataccctt  
1-8tRNA-Ile(tat)[27444,27518]  
gccccttagccaagcgggtcaaggcagtgaggattatgtcctgcgaatcg  
gaagttcgaatctccaaggggagc  
1-9tRNA-Arg(tct)[27618,27693]  
tatcccttagccaagtggttaaggcatcgggcttctatcccgtagatc  
gtgggttcgattcctacagggggtgt  
1-10tRNA-Ser(tga)[27782,27873]  
ggaagggtactcaagtggataaaagaggcggtcttgaaaaccgctaggc  
gtgtaaaagcgtgcgtgggttcgaatccactcctccgcca  
1-11tRNA-Gln(ttg)[27951,28023]  
tttcggagtagccaagtggtaaggcaatagactttgactctatgatcggt  
ggttcgagaccatcctccgaagt  
1-12tRNA-His(gtg)[28106,28178]  
cggggtgtggcgtaacggttaacgcaagtactgtggatcactgaatagg  
ggttcgattcccctcatcctgac  
1-13tRNA-Pro(tgg)[28186,28261]  
gtgggtgtagctcagattggctagagcgcttgcttgggagcaagaagtc  
gcaggttcaagtcctgtcaccgccc  
1-14tRNA-Phe(gaa)[28369,28444]  
ggacggatagctcagttggtagagcagagggtgaaaatcctcgtgtcgt  
agggtcgaaccctactccgtccacca  
1-15tRNA-Tyr(gta)[28586,28672]  
gggcgagtatgcaaattggtgaagcaagcggctgtaaaaccgtgacgta  
agatacatgacgggtcgaatcctgcctttccacca  
1-16tRNA-Ile(gat)[28674,28750]  
gctagggtagctcagtcaggtagagcagtgcttgataaggcattggtcg  
taggttcgaatcctaccctagtagca  
1-17tRNA-Leu(taa)[28761,28848]

ggcggagtggtggaattggtagacatatggcacttaaaatgctatgtccg  
tacgggcgtgggtgggttcgagtccccctccgctacca  
1-18tRNA-Leu(tag)[28854,28929]  
tgccgaagtaatccaatggcagagatagcggtttagaaaccgtacagtg  
tgggttcgagtcccaccttcggtatc  
1-19tRNA-Met(cat)[29079,29151]  
agggttatagctcagtggtagtagcgtgggtctcataagcccaaggtcgt  
aggttcaactcctactagcccta

>KP339049.1 Enterococcus phage EFDG1, complete genome

1-1tRNA-Pro(tgg)c[44887,44959]  
cgggaaatagcgcagttggtagcgcacacgttttgggagcgtggggtcgt  
aggttcgagtcctgctttccga  
1-2tRNA-Ala(tgc)c[45279,45351]  
ggggcattagctcagttgggagagcgtacccttgcaaggtagatgtcag  
cggttcaagtccgctatgtcca  
1-3tRNA-Arg(tct)c[45359,45433]  
tatctccgtaggctaattggataaaccacaggatttctaattcccgcattc  
tgagttcgaatctcagcggaggtgt  
1-4tRNA-Ser(tga)c[45835,45923]  
tcggggagtatcataactggtattcagcgtgattgaaatcatgtagacg  
tgtaaaagcgttgggggttcgagtcctcctcctcgt  
1-5tRNA-Ser(gga)c[46019,46105]  
ggaaggttactcaaacggtaaagaggcttggttggaaccaagtagatgt  
gtaacagcatgtgtgggttcgaatcccatgcctcca  
1-7tRNA-Leu(tag)c[47280,47355]  
tgcgagagtatcccaactggcagaggaagtagacttagaatctattcagt  
gagggttcgaatccctcctctgtat  
1-8tRNA-Leu(taa)c[47997,48082]  
tcgggtatggcggaattggtatacctgtggacttaaaatccattgtcc  
tttgtacatgcaggttcgactcctgttacctgtat  
1-9tRNA-His(gtg)c[48259,48329]  
gtgactgtacctaattggaaggcagtttctgtggaacatgaatctca  
gttcgattctgagcagtcaca  
1-10tRNA-Ile(gat)c[49038,49111]  
accagtgtagctcagttggttagagcatcgtcttgataaggcgggtgtca  
gaggtcaaatcctctcactggta  
1-11tRNA-Val(tac)c[49265,49336]  
accgtcttagttcagttgggagaacgccacccttacaagtgatgtcaca  
ggttcaaactcgttagacggtta  
1-12tRNA-Arg(acg)c[49569,49641]  
cgacagttcgttcaattggataggatgctagactacgaatctagtatag  
aggttcgattcctttactgtcgg  
1-13tRNA-Lys(ttt)c[49742,49818]  
tgtcttcatagctcaatcggctagagcaccgcacttttaatcggggggtt

cggggttcaaaccctgtggggacatc  
 1-14tRNA-Lys(ctt)c[49951,50026]  
 tatctccttagctcagttggtgtagcacctgactcttaacagggggtc  
 acaggttcgaatcctgtaggggatat  
 1-15tRNA-Thr(tgt)c[50218,50289]  
 gctgatttagtataacggctattactccggctttgtaacccgggaatggg  
 agttcgattctctcaatcagca  
 1-16tRNA-Phe(gaa)c[51446,51519]  
 ggagaggtagctcagtcggttagagcactagcctgaaaaactaggggtc  
 gtggttcaattccaccctctcca  
 1-17tRNA-Cys(gca)c[51641,51713]  
 gcgggagtagccaagtgggttaaggctagggttgcaaaccctgaacgt  
 gattcgaatctcaccttctgct  
 1-18tRNA-Trp(cca)c[51953,52026]  
 tgcgctgttggtgtagtggtatcattccggctccaacccggaagacgg  
 ggggtcgaatccttcacggcgtgt  
 1-19tRNA-Met(cat)c[52237,52309]  
 ggactattagctcagtaggtcagagccgtcagctcataactgacaggtt  
 ggggttcgattcccaagtagtcca  
 1-20tRNA-Glu(ttc)c[52516,52589]  
 tggcgcatgtgtcaagcgggtcaagacaccggtcttcgaaccggaatcga  
 gattcgaactctctcatgcgtat  
 1-21tRNA-Asp(gtc)c[52593,52669]  
 tgggctattggagcagtcaggagtgctcgtctcctgtcacggagaaggt  
 catgggttcaagtcacatatagtcgt  
 1-22tRNA-Ser(gct)c[53569,53660]  
 tggaaaggttactcaaattggttaagagggtgattgctaactcagtaggtc  
 ggagaaatccggtgtaagggttcgaccccttaccttccatc  
 1-23tRNA-Gln(ttg)c[53768,53841]  
 ttgtcaggtcgtctaacaggtaggacacgaccttgaagggtgcgatac  
 aggttcgaaccctgtcctgacagt  
 1-24tRNA-Asn(gtt)c[53932,54004]  
 ttacatgatgatgaaacggtatcatgactggctgttaaccagttctgtga  
 ggttcaagtcctgctaggtgagt

>KM092515.1 Escherichia phage HY02, complete genome

1-1tRNA-Pro(tgg)[25341,25417]  
 ctctgttagctcagcttggttagagcgttccgtttggggcggttaaggccg  
 gaggttcaagtcctccaacagagacca  
 1-2tRNA-Glu(ttc)[25425,25502]  
 gttccagtagacaaaatggtatagtcaccactctttcaaagtggaattt  
 gagggttcaaatccattctggaacgcca  
 1-3tRNA-Met(cat)[25594,25670]  
 tgcgggtatagagaaaggcgtctcacatgtctcattagcatggtatcgg  
 caggttcgactcctgcacccgcctcca



1-4tRNA-Asn(gtt)[25748,25822]  
ggtaggaagcacatgaggtatgtcggtcgcctgtaagcgaatggcac  
agggttcgaatccctgactaaccgc  
1-5tRNA-Tyr(gta)[25833,25920]  
gtgtcggtatcccgtagatggtagcgggtgggactgtaaatccctgtca  
ttgagactcggtaggttcgactcctacacggcacacca  
1-6tRNA-Lys(ttt)[26348,26423]  
ggaagtgtagcagaatggtgatgcggcagacttttaatctgacaggcga  
gggttcgaatccctccacttctacca  
1-7tRNA-Met(cat)[26428,26504]  
gggtcagtcgcagataaggtaatgaagggtctcataagccctatgaatg  
tgggttcgattcccatctgaacctcca  
1-8tRNA-Ile(gat)[26506,26581]  
gctggtatagttaagaaggtataacactcccctgataagggaacatcgg  
tgggtcgattccacctaccagtacca  
1-9tRNA-Arg(tct)[26829,26905]  
gcacccttagttcaattggatagagcaacggcttctaaatcgtagtta  
cagggttcgaatcctgtagggtgtgcca  
1-10tRNA-Ser(tga)[27144,27233]  
ggtaggtagcggctaattggtagccaaactgtcttgaaaacagttgccact  
gtagagatacggtaggggttcgactccttacttaccgcc  
1-11tRNA-Leu(tag)[27490,27567]  
gggagattgacggtaattggtaaacctaccatccttagaagttggtgtt  
gagggttcgaatcccttgtctccacca  
1-12tRNA-Lys(ctt)[27575,27650]  
gcaggtgtagcaaaatggttatgcggctgactcttaatcagtaagacgat  
gggttcaattccctccacctgtacca  
1-13tRNA-Ala(tgc)[27657,27732]  
ggggtcatagtttatatggttaaaatcgagtttgcaaacttggaact  
gagttcaattctcagtactccacca  
1-14tRNA-Gly(tcc)[27739,27813]  
gcatccatagtttaaacgggaaaattacagtcttccaaactgaggttgag  
ggttcgattccctctggatgtcca  
1-15tRNA-Thr(tgt)[27821,27896]  
gctcctatcgataattggctattacggttgccttgaagcaacttatca  
gggttcgaatccttgtgggagcacca  
1-16tRNA-Val(tac)[27994,28068]  
actcgcttagtttatatggtaaaacatcaccttacaagatgaagaaaaa  
ggttcaagtcctttagtgagtacca  
1-17tRNA-Leu(caa)[28070,28147]  
gttccagtatcccaattggcagaggatgcaagctcaaacctgtactagt  
gacggttcgaatccgtcttggaacacca  
1-18tRNA-Arg(acg)[28153,28228]  
gcaggattagttcaaatggatagagcaacagtctacgaagctgtaatag

gggttcgaatcccttatcctgcgcca  
1-19tRNA-Gln(ttg)[28814,28889]  
aggggattagtttacaaggttaaacctcggctttgaaatcgaagaagt  
tgggtcaattccaacatcccccgcca  
1-20tRNA-Leu(taa)[28892,28970]  
gtccattactccaattggcagagaggccagacttaaaatctgtgttatg  
tatcgggtcgaatccgatatggagtacca  
1-21tRNA-Gln(ctg)[28976,29051]  
agcggtagtagcataactggcaatgcagcagctctgaagctgtcttatta  
aggttcaaatccttatgccgctgcca  
1-22tRNA-His(gtg)[29083,29158]  
gtggccttatcataaatggtaatgacccatgctgtgaacatgggtctatac  
gggttcaaatcccgtaggtcacccca  
1-23tRNA-Phe(gaa)[29165,29240]  
agtccaagtagcttatatggttaaagcgcgtgtctgaaaaacatgagaag  
aggggtcaaatcccactggactacca  
1-24tRNA-Ser(gct)[29993,30085]  
ggaagattaaccctaaaaggtaaggagcagtttgctaaactgccagtag  
ctgagaaatcggtgtaccagttcaagctggtatcttctcca  
1-25tRNA-Cys(gca)[30090,30165]  
gaatccgtgacagaaatggctatgtgcctgtctgcaaacagggttataa  
gggttcgagtccttcggattctcca

>KF055347.1 Escherichia phage JH2, complete genome

1-1tRNA-Cys(gca)c[69613,69688]  
gaatccgtgacagaaatggatatgtgcctgtctgcaaacagggttataa  
gggttcgagtccttcggattctcca  
1-2tRNA-Ser(gct)c[69693,69785]  
ggaagattaaccctaaaaggtaaggagcagtttgctaaactgccagtag  
ctgagaaatcggtgtaccagttcaagctggtatcttctcca  
1-3tRNA-Phe(gaa)c[70538,70613]  
agtccaagtagcttatatggttaaagcgcgtgtctgaaaaacatgagaag  
aggggtcaaatcccactggactacca  
1-4tRNA-His(gtg)c[70620,70695]  
gtggccttatcataaaaggtaaatgacccatgctgtgaacatgggtctatac  
gggttcaaatcccgtaggtcacccca  
1-5tRNA-Gln(ctg)c[70727,70802]  
agcggtagtagcataactggcaatgcagcagctctgaagctgtcttatta  
aggttcaaatccttatgccgctgcca  
1-6tRNA-Leu(taa)c[70808,70886]  
gtccattactccaattggcagagaggccagacttaaaatctgtgttatg  
tatcgggtcgaatccgatatggagtacca  
1-7tRNA-Gln(ttg)c[70889,70964]  
aggggattagtttacaaggttaaacctcggctttgaaatcgaagaagt  
tgggtcaattccaacatcccccgcca

1-8tRNA-Arg(acg)c[71550,71625]  
gcaggattagttcaaatggatagagcaacagtctacgaagctgtaatatag  
gggttcgaatcccttatcctgcacca  
1-9tRNA-Leu(caa)c[71631,71708]  
gttcagtatcccaattggcagaggatgcaagctcaaacctgtattagt  
gacgggtcgaatccgtcttggaaacacca  
1-10tRNA-Val(tac)c[71710,71784]  
actcgcttagtttatatggtaaaacatcacccctacaagatgaagaaaa  
ggttcaagtcctttagttagtacca  
1-11tRNA-Thr(tgt)c[71880,71955]  
gctcctatcgtataattggctattacgggtgccttgaagcaacttatca  
gggttcgaatccctgtgggagcacca  
1-12tRNA-Gly(tcc)c[71963,72037]  
gcatccatagtttaaacgggaaaattacagtcctccaactgaggttgag  
ggttcgattccctctggatgctcca  
1-13tRNA-Ala(tgc)c[72044,72119]  
ggggtcatagtttatatggttaaaatcgagtttgcaaactcggaact  
gagttcaattctcagtgactccacca  
1-14tRNA-Lys(ctt)c[72126,72201]  
gcaggtgtagcaaaatggttatgcggctgactcttaacagtaagacgat  
gggttcaattccctccacctgcacca  
1-15tRNA-Leu(tag)c[72209,72286]  
gggagattgacggtaattggtaaacctaccatccttagaagttggtgtt  
gagggttcgaatcccttgtctctacca  
1-16tRNA-Ser(tga)c[72542,72631]  
ggtaggtagcggctaattggcagccaaacagtcttgaaaactgtgccact  
gtagagatacggtaggggtcgactccttacttaccgcc  
1-17tRNA-Arg(tct)c[72870,72946]  
gcacccttagttcaactggacagagcaaatgacttctaattcattgagtta  
caggttcgaatcctgtagggtgtgcca  
1-18tRNA-Ile(gat)c[73283,73357]  
tgtgggtagcataaatggtaatgcaaacggctgataaccgtagaagag  
ggttcgataccctcacctacaacca  
1-19tRNA-Met(cat)c[73360,73436]  
ggttcagtcgcagataaggtaatgcaagggttcataagccctatgaatg  
tgggttcgattcccatctgaacctcca  
1-20tRNA-Lys(ttt)c[73441,73516]  
ggaagtgtagcagaatggatgatgcggcagacttttaacttgacaggcgat  
gggttcgaatccctccacttctacca  
1-21tRNA-Asp(gtc)c[73974,74051]  
ggttatgtagttaatctggttaaaatactcccctgtcacgggagatgat  
gagggttcaaatcccttcgtaaccgcca  
1-22tRNA-Tyr(gta)c[74058,74145]  
gtgtcgttatcccgtagatggtagcgggtgggactgtaaatccctgtca

ttgagactcggtagggtcgactcctacacggcacacca  
 1-23tRNA-Asn(gtt)c[74216,74292]  
 ggtaggaagcacataaggtatgtcggctgcctgtaagcgaatggcac  
 aggggtcgaatccctgactaaccgcca  
 1-24tRNA-Met(cat)c[74370,74446]  
 tgcgggtatagagaaaggcgtctcacatgtctcattagcatggatcgg  
 cagggtcgactcctgcacccgcctcca  
 1-25tRNA-Glu(ttc)c[74538,74615]  
 gtccagtagacaaaatggtaaagtcaccactcttcaaagtgatatt  
 gagggttcaaatcccttctggaacgcca  
 1-26tRNA-Pro(tgg)c[74623,74699]  
 ctctgttagctcagcttgtagagcgttccgttggggcggttaaggccg  
 gaggttcaagtctccaacagagacca  
 >KC595512.2 Bacillus phage JL, complete genome  
 1-1tRNA-Met(cat)[32882,32956]  
 gggtccttagctcaattggtagagctaccggctcataaccggtgggttg  
 taggttcgattcctacaggaatcac  
 1-3tRNA-Trp(cca)[33994,34069]  
 tgggggtatagtttaactggataaaaccgtggtctccaacaccactatt  
 ctaggttcgaatcctagtgcctcgt  
 >KP007361.1 Enterobacteria phage vB\_EcoM\_VR25, complete genome  
 1-1tRNA-Arg(tct)c[68958,69033]  
 cgaggcatagctcagaaggaagagcaaggaccttctaagtcctaggtcgt  
 aggttcgatccctactgtctcgacca  
 1-2tRNA-Met(cat)c[69168,69241]  
 ggccctgtagctggacgggtcaagcgagcgactcataatcgctggatggtg  
 gttcgattccaccagggccacca  
 >KP027446.1 Staphylococcus phage phiIPLA-RODI, complete genome  
 1-1tRNA-Met(cat)c[8503,8574]  
 ggactcttagcttaaaggtaaagccaaccgctcataacgggttgactgta  
 gggtcgaatcctgcagagtcca  
 1-2tRNA-Trp(cca)c[30818,30889]  
 acacccttagtataattagtagtacaagggtctccaaaacccttagtctt  
 tgtgcaaatcaaagagggtgtg  
 1-3tRNA-Phe(gaa)c[30896,30968]  
 gggttcttagctcagatggtagagcactagattgaagctctaggtgtcat  
 tgggtcaaatccaatagaaacca  
 1-4tRNA-Asp(gtc)c[30974,31049]  
 tggctcattgggtgtaactggtaacacactgccctgtcacggcgagagagt  
 acgagttcgagtcctgtatgagtcgt  
 >KP202158.1 Yersinia phage vB\_YenM\_TG1, complete genome  
 1-1tRNA-Gly(tcc)c[64617,64692]  
 gcagagttcgatatagtggttaatactattggtttccgccagtaaacat  
 cgggtcgaatccgatactctgtcca

1-2tRNA-Trp(cca)c[64945,65019]  
 aggtctttagtatagtggcgattatgctaggctcaaacctagtgacgag  
 tgttcgattcactcaaggcctgcca  
 1-3tRNA-Arg(tct)c[66301,66377]  
 gtctcatagctcaacaggacagagcaacggtcttctaaccgtagggtg  
 ctggttcgattccagctggggacacca  
 1-4tRNA-Met(cat)c[67178,67254]  
 ggccctttagctcagatggatagagcagtcgactcataatcgattggta  
 ctggttcaaatccagtaagggccacca  
 >KF356199.1 Microcystis phage MaMV-DC, complete genome  
 1-1tRNA-Met(cat)c[38445,38517]  
 gcaggattggccgataggtggaggcaccgtcctcataagacggcttagag  
 cggttcgattccgctatcctgca  
 1-2tRNA-Tyr(gta)c[152269,152351]  
 gggtagtgccgagtagtcgaaggcaacagactgtaaatctgtagta  
 attccacgctgggtgcaaatccagcctaaccac  
 >KP007359.1 Enterobacteria phage vB\_EcoM\_VR5, complete genome  
 1-1tRNA-Arg(tct)c[67942,68017]  
 cgaggcatagctcagaaggaagagcaaggaccttctaagtcctagtcgt  
 aggttcgatccctactgtctcgacca  
 1-2tRNA-Met(cat)c[68152,68225]  
 ggccctgtagctggacggtaagcgagcgactcataatcgctggatgggtg  
 gttcgattccaccagggccacca  
 >KC595513.2 Bacillus phage Shanette, complete genome  
 1-1tRNA-Met(cat)[33565,33641]  
 tggttccttagctcaattggttagagcacacggctcataaccgtgcggtt  
 gtaggttcgattcctacaggaatcatc  
 1-3tRNA-Trp(cca)[34766,34841]  
 tgggggtatagttttaactggctaaaaccgtggtctcaacaccactatt  
 ctaggttcgaatcctagtgccctcgt  
 >JF704092.1 Mycobacterium phage Alice, complete sequence  
 1-1tRNA-Ser(gct)[29314,29397]  
 ggagggtagcatctgggtgatgcaggggtcctgctaaggccctacggatt  
 catacccgtagtttcgattactcctccctccgc  
 1-2tRNA-Leu(cag)[29494,29568]  
 gctccgctatgcaaactggcaaagcagccgtgttcagagcgcggtgtttc  
 tcggttcgaccccgaggcggagtgc  
 1-3tRNA-Leu(gag)[29572,29646]  
 gtctctgtaggcaaactggcaaagcccatcttgagggggtggtgcgtg  
 cgggttcgactcccgcagagacac  
 1-4tRNA-Leu(caa)[29647,29720]  
 gccgtggtaggccatctggcgagccgccgagttcaagtttcggtgtttgc  
 ggggtcgaatcccggccacggtac  
 1-5tRNA-SeC(tca)[67477,67573]

attctggcactgggtggcgagcccaccggcgagccttcaagctgtcgct  
ggccggagaatcgaccggaacatcccgttcaacgcgaccaggggcc  
1-6tRNA-Pro(tgg)[90640,90714]  
cgggggtgtagttcagtttgaagagcgcttggtttgggaccaagttgtcg  
caggttcgaatcctgtcaccgccgac  
1-7tRNA-Trp(cca)[90729,90799]  
gggtctgtgcacaggggtccccgacggctctcaaagccgaaggcgggggtt  
cgattccctccaggcctgcca  
1-8tRNA-Tyr(gta)[90801,90885]  
cccgtacatgcccaactggtgttgggagcaggctgtaaccctgtggcct  
tcgggacggtaggttcgattcctcagtcggggac  
1-9tRNA-Pyl(cta)[92340,92412]  
gcaccatttgctcaatggcagagcggcggttctaaaaccgtgagtgtcg  
gttcgactccggcatggtgcacc  
1-10tRNA-Met(cat)[92562,92636]  
agcgggtgtagagcagctaggtagctcgccgggtcatgaccggaggacg  
cgtgttcgattcacgccaccgccac  
1-11tRNA-Cys(gca)[92763,92834]  
gcgccttggcggaatggctacgtgctcggtcgaacccgagttatcccg  
gttcgactccgggaggcgctc  
1-12tRNA-Glu(ctc)[92902,92973]  
gtcccatgggtagtggttaaccctcctggttctcagccaggcgtccga  
gttcgatcctcggtaggtgc  
1-13tRNA-His(gtg)[92975,93048]  
gtggccgtagttcagccggtagaacgtgggttgtgatccagtcgtcga  
gggttcgagtcctccggtcaccc  
1-14tRNA-Ala(tgc)[93212,93285]  
gggcctatagctcatctggtagagcgcttccttgcaagcaggaggcggc  
aggttcaagtcctgttaggtccac  
1-15tRNA-Phe(gaa)[93475,93547]  
gccgtcatagctcagttggtagagcactggcctgaaaaccggtagggcga  
ggttcgagtcctcgtgtcggcac  
1-16tRNA-Val(cac)[93553,93626]  
gtccgttagctcagctggaagagcgctcgggtccacaccgagaggccgc  
aggttcgatccctgcaatggacac  
1-17tRNA-Gly(gcc)[95021,95096]  
gcgaaggtagctcagcctggccagagcatcacgttgccaaggtggaggtc  
cggggatcgtaacccgttctcgctc  
1-18tRNA-Asp(gtc)[95100,95172]  
ggccctgtagctcagaggaagagcacccgcctgtcgagcgggaggtcgcg  
gtatcgtaatccgtcagggtcgc  
1-19tRNA-Met(cat)[95232,95304]  
gcctcactagctcattggtagagccgctcgctcataacgtgcaggtacct  
ggttcgattccagggtgaggtac

1-20tRNA-Ile(gat)[95310,95384]  
gcctgttagcggactggctcgtccgatccaagctgataactggcgtaagc  
ggtgttcgattcaccgagcaggtac

1-21tRNA-Arg(acg)[95478,95550]  
gcctctatggtccaacggagatgacgccggtctacggaaccggagatgcg  
tgttcgattcgcgctaggggcac

1-22tRNA-Val(gac)[95593,95665]  
gtccgtgtagctcagggtagagcgctgctcgacacgcaggaggaccga  
ggttcgaaacctcgcatggacac

1-23tRNA-Arg(ccg)[95760,95829]  
gtcctcgctgacggactctgccctggccctccggaggccgggtgggtgggt  
tcgattccacccggggacac

1-24tRNA-Arg(cct)[95837,95910]  
gcctctgtagctcaacggacagagcaacgcggtcctaacgcggtggctgg  
aggttcgaatcctctcggaggcac

1-26tRNA-Gln(ttg)[96432,96507]  
tggggatggtggcaatctggcagtcgcccgcgactttgactccggaggt  
gcaggttcgagccctgctaccccatc

1-27tRNA-Arg(tct)[96511,96586]  
gccctgttagctcagtgagacagagcgcgagcttctatctcggggccgg  
gagttcgaatcctccaggggcacca

1-28tRNA-Lys(ttt)[96636,96709]  
ggggcggttggtgaacgtggttatcactcttggttttaccttgaatacc  
gggatcgagacccggagcggccac

1-29tRNA-Gln(ctg)[124380,124454]  
tgctcgttggtgtaactggcaacactacggactctggctccgtcattctt  
ggttcgaatccagggcgagcaacca

1-30tRNA-Asn(gtt)[124461,124534]  
tgggggtagttcaactggaagaacgctcgactgttaatcgagtagttga  
aggttcgagtcctccactccagc

>KP007362.1 Enterobacteria phage vB\_EcoM\_VR26, complete genome  
1-1tRNA-Arg(tct)c[67359,67435]  
cgggggttaactcaattgtatagtagcggctcctctaaaccgcaggtta  
aaggttagaatcctttacccccacca

1-2tRNA-Met(cat)c[67440,67514]  
ggcccttagctcaatgggagagctgtcagctcataactgataggtagct  
ggatcgaaaccagcaagggccacca

>KF767351.1 Lactobacillus phage phi jlb1, complete genome  
1-1tRNA-Glu(ttc)[12231,12304]  
tggctcgttggtcaaatggctaagactccacactttcacggtggagttac  
aagttcaattctgtacgagctat

>KR296692.1 Salmonella phage 38, complete genome  
1-1tRNA-Ser(gct)c[17952,18040]  
ggaaggttggccgagaggtttaagggactcgactgctaatacgagtggggc

ttttagccccgaaggttcgaatccttcaccttcgccca  
1-2tRNA-Tyr(gta)c[18117,18200]  
gtgagtggtggcagagcggtcgaatgcaggagactgtaaatctccccgtaa  
cagcgcgggtggttcaaattccatccactcacacca  
1-3tRNA-Asn(gtt)c[18955,19030]  
gacgatgtagttcagtcggtagaacggcggctgttaaaccgtatgtcgc  
aggttcaagtcctgccatcgtcgcca  
1-4tRNA-Met(cat)c[19443,19517]  
ggcccgtagctcagtggttagagcagtcgactcataatcgattggtcgct  
ggttcaagtcagccagggtcacca

>KF006817.1 Mycobacterium phage Breeniome, complete genome

1-1tRNA-Ser(gct)[30286,30369]  
ggagggtgagcatcaggtgatgcagcgagattgctaattccgtacggttaa  
ccaccccgtaggttcgaatcctcctccctccgc  
1-2tRNA-Leu(cag)[30562,30637]  
gctcccgtagcccaattggcaggaggcaccagattcaggatctgggcagt  
gtgagttcgaatctcaccgggagtac  
1-3tRNA-Leu(gag)[30757,30831]  
gtctctgtaggcaaatcgaaaagccgccatcttgagggggtggtgcgtg  
cgggttcgactcccgcagagacac  
1-4tRNA-Leu(caa)[30832,30905]  
gccgtggtaggcatctggcgagccgccgagttcaagtttcggtgtttgc  
gggttcgaatcccgcacgggtac  
1-5tRNA-SeC(tca)[66355,66451]  
attctggcactggtggcgagcccaccggcgagcttcaagctgtcgt  
ggccggagaaccgaccggaacatcccgttaacgcgaccagggcc  
1-6tRNA-Pro(tgg)[90723,90795]  
cggggtgtagttcagtggaagagcgttggttgggaccaagatgtcgca  
ggttcgaatcctgtcaccccgac  
1-7tRNA-Trp(cca)[90812,90887]  
tggggtgaagccgatctggaaggcagcggcttccaaagcgtctcatagc  
gggttcgaatcccgtcacccctgcca  
1-8tRNA-Tyr(gta)[90889,90975]  
gccgcacatgcccaactggtgttgggagcaggtgtaaccctgtggcct  
tcgggacggtgaggttcgattcctcagtcggtacca  
1-9tRNA-Pyl(cta)[92084,92156]  
gcaccatttgctcaatggcagagcggcggcttctaaaaccgtagtgccg  
gttcgactccggcatggtgcacc  
1-10tRNA-Met(cat)[92306,92380]  
agcgggtgtagagcagctaggtagctcgccgggtcataaaccggaggacg  
cgtgttcgaatcacgccaccgccac  
1-11tRNA-Cys(gca)[92507,92578]  
gcgccttggcggaatggctacgtgctcggtgcaacccgagttatcccg  
gttcgactccgggaggcgctc



1-12tRNA-Glu(ctc)[92583,92657]  
gggccgttgagtagatggatatctcgccaccctctcaaggtggagatca  
cgggttcaagtcccgtacggactgc  
1-13tRNA-His(gtg)[92659,92732]  
gtggccgtagttcagccggtagaacgctgggttgatcccagtcgtcga  
gggttcgagtcctccggtcaccc  
1-14tRNA-Ala(tgc)[92894,92968]  
gggcctgtagctccaattggtagagcagcatcctgcaagatgacggctg  
tcggttcgaatccgacctggtccac  
1-15tRNA-Phe(gaa)[93158,93230]  
gccgtcatagctcagttggtagagcactggcctgaaaaccagtgggccga  
ggttcgattcctcgtgtcggcac  
1-16tRNA-Val(cac)[93236,93309]  
gtccgttagctcagctggaagagcgctcggccacacccgagaggccgc  
aggttcgatccctgcaatggacac  
1-17tRNA-Lys(ctt)[93428,93500]  
gccttcgtagctcagtggttagagctgtcgcctcttaagcgataggtcgtt  
gggtcgaatccagccgggggcac  
1-18tRNA-Glu(ttc)[93505,93581]  
ggtcgggtcggctcgtggtatggccagtcggattttcactccggacatt  
cgcgggttcaattcccgctcccgatcgc  
1-19tRNA-Gly(tcc)[93661,93733]  
gggggtgtggccgaatggctcaggcaccagatttcactctggctacgca  
ggttcgattcctgtcatccgctc  
1-20tRNA-Thr(cgt)[93793,93867]  
gctgctgtagctcacctggcagagcgtcggcgtcgtatcccgaaggcatc  
cggttcgagtcggacagcagcccc  
1-21tRNA-Thr(tgt)[93868,93940]  
gcctctgtgtccagcggcacggacatccgccttgtaagcggaggacccc  
cgttcgatccgggtagaggctc  
1-22tRNA-Thr(ggt)[94348,94420]  
gctgggttagctcagtggttagagcgttcctcggtagcggaaggcccg  
ggttcaatccccgactcagctc  
1-23tRNA-Gly(gcc)[95743,95816]  
gcgaaggtagctcagctggttagagcgccaccttgccaaggtggaggtcgc  
gggatcgtaacccgttcttcgctc  
1-24tRNA-Asp(gtc)[95820,95892]  
ggccctgtagctcagaggaagagcgccggtctgtcgaatcgagggtcgcg  
gtatcgtaatccgtcagggtcgc  
1-25tRNA-Met(cat)[95952,96024]  
gcctcactagctcattggtagagccgctcgtcataacgtgcaggtacct  
ggttcgattccagggtgaggtac  
1-26tRNA-Ile(gat)[96030,96104]  
gcctgttagcggactggctgtccgatccaagctgataactggcgtaagc

ggtgttcgattaccgagcaggtag  
1-27tRNA-Arg(acg)[96198,96270]  
gcctctatggtccaacggatatgacccggtctacggaaccggagatgcg  
tgttcgattcgcgctaggggcac  
1-28tRNA-Val(gac)[96313,96385]  
gtccgtgtagctcagggtagagcgctgctcgacacgcaggaggaccga  
ggttcgaaacctcgcatggacac  
1-29tRNA-Arg(cct)[96559,96632]  
gcctctgtagctcaacggacagagcaacgcggtcctaacgcggtggctgg  
aggttcgaatcctctcggaggcac  
1-31tRNA-Gln(ttg)[97173,97248]  
tggggtaggtggcaatctggcagtcgcccgactttgactccggagggt  
gcaggttcgagtcctgctaccccatc  
1-32tRNA-Arg(tct)[97252,97327]  
gccctttagctcagtgacagagcggcgagcttctacctcgccggccgg  
gagttcgaatcctcaccaggggcacca  
1-33tRNA-Gln(ctg)[124745,124819]  
tgctcgttggtgtaactggcaacactacggactctgactccgtcattta  
ggttcgaatcctaagcgagcagcca  
1-34tRNA-Asn(gtt)[124826,124901]  
tgggggtgccgtaatcaggcaaacgagcggactgtaatccgccctgc  
aggttcgaatcctgccaccccagcca

>KR296685.1 Salmonella phage 21, complete genome

1-1tRNA-Leu(tag)c[21556,21628]  
tggcgattgatggaattggtatcctgccgtccttagaagtcggataaggg  
ggttcaagccccctgtgccacc  
1-2tRNA-Gln(ttg)c[22981,23054]  
tgggaagatggtgtaggattggtagcacacgtgtctttgaaaaccgtagti  
caggttcaagtctgatcttcccc

>KR296684.1 Salmonella phage 19, complete genome

1-1tRNA-Tyr(gta)[91411,91500]  
gtgtcgttagaccgtagggtagcggggcagactgtaaatctgtggctc  
gaaagggttcgggtagttcgactctatcacggcacacca  
1-2tRNA-Ile(gat)[91508,91583]  
gggagtatagctcagttagtagagcgctcgaccgataatcgagaggtcgc  
aggagcaaagcctgctactcccacca  
1-3tRNA-Glu(ttc)[92351,92426]  
gtcctatcggctaagtggataggcccgagactttcaatctggaaatcc  
gagttcgattctcggtaggagtcca  
1-5tRNA-Trp(cca)[92512,92588]  
agggacttagcacaattggctagtgcagcggattccaaatccgcaggttc  
tgggttcgaatccaaggtccctgcca  
1-6tRNA-Ser(tga)[92594,92668]  
aggaggatggtgtaattggttagcacacgggtcttgaaatccgtagttca

ggtcaagtcctgatcttctgcc  
 1-7tRNA-Ser(gga)[92901,92992]  
 ggtggaatggtcgagcggtaaagacagcaccttggaaggtgctggccc  
 cctcacaggggtccgtaggtcgaatcctacttccaccgcca  
 1-8tRNA-Ser(gct)[92998,93091]  
 ggaagattaaccctaatacaggaaggatctcttgctaaagagacagta  
 gccccggaagggtgtgtcagttcaaatctgacatcttctcc  
 1-9tRNA-Ser(tga)[93092,93180]  
 ggagagcagggcgcgtggtgcgtaatccggttgaacccggacccatcgt  
 agcgatacggtagacagttcgattctgtgtctctctcca  
 1-10tRNA-Asn(gtt)[93328,93412]  
 gacgagttggcctagtgttggcggcggcctgtaagccgtgagtga  
 actcaaggaaggttcaaatcctcactcgtcgcca  
 1-11tRNA-Asp(gtc)[93420,93495]  
 ggggatattggtattagcggtaaacatactggcctgtcacgccggagtcac  
 ggggtcgaatccggttatctctgcc  
 1-12tRNA-His(gtg)[93499,93570]  
 tgggaaattagttaagtggtataatggcctctggtgctgaggcgtctct  
 gttcgattcaggaattcccgcc  
 1-13tRNA-Pro(tgg)[93691,93766]  
 cagtcgtagcgcagttggttagcgtgggagccttgatgcttcgggtcgc  
 aggttcgagtcctgccgggctgacca  
 1-14tRNA-Leu(tag)[94013,94088]  
 tggcgattgatgaattggaatacgtgccgtccttagaagtcggatttt  
 gggggttcgagtcctgtcgcccacc  
 1-15tRNA-Phe(gaa)[94209,94284]  
 ggggtttagctcagttggttagacacctgattgaagatcagggtgtcgg  
 tgggtcgagtcacccggccccacca  
 1-16tRNA-Met(cat)[94540,94615]  
 tgcgagctagaattctggtgaattcacgagtcataagcttggtcagag  
 ggggtcgattccgctgctcgcaacca

>KP054477.1 *Lactobacillus* phage LfeInf, complete genome

1-1tRNA-Ser(gct)c[30472,30562]  
 tggagaattacccaagttggtgaaggggcgcccctgctaagggtgtagg  
 ccgggaaaccggtgcgagggttcaaatccctcattctccgt  
 1-2tRNA-Thr(tgt)c[30637,30709]  
 gctaatttagtcaatcggcagagcgctgcctgtaagcaggaggttac  
 aagttcgattctgtaattagca

>KJ206559.1 *Staphylococcus* phage 812, complete genome

1-1tRNA-Met(cat)c[14398,14469]  
 ggactcttagcttaaaggtaaagccaaccgctcataacggttgactgta  
 ggttcgaatcctgcagagtcca  
 1-2tRNA-Trp(cca)c[37617,37688]  
 acacccttagtataattagtagtacaagggtctccaaaacccttagtctt

tgtgcaaatcaaagagggtgtg  
1-3tRNA-Phe(gaa)c[37695,37767]  
ggtttcttagctcagatggtagagcactagattgaagctctaggtgtcat  
tggttcaaatccaatagaacca  
1-4tRNA-Asp(gtc)c[37773,37848]  
tggctcattgggtgaactggtaacacactgccctgtcacggcagagagt  
acgagttcgagctctctatgggtcgt

>LN887844.1 Pseudomonas phage VCM genome assembly VCM, chromosome : 1

1-1tRNA-Gly(tcc)c[69564,69636]  
gtgtgtcgtataacggctattatatctggctccacccagaggactaggg  
ttcgattccctacacccgcacca  
1-2tRNA-Cys(gca)c[69644,69718]  
tccttgttggctgaacggctagcggtgattgcaaaccagcattaagtg  
ggttcaactcccacacaaggctcca  
1-3tRNA-Leu(tag)c[69783,69867]  
gggttcgtgggtgaactggatacacactagcttagaaactagcgccga  
aaggattgaggatcgtgaccctccgagcctacca  
1-4tRNA-Ala(tgc)c[70116,70191]  
gggcacatgtccaagggatggcgagtttccttgcacgcagactgtgaa  
gagttcgattctcttgtctccacca  
1-5tRNA-Pro(tgg)c[70385,70458]  
ctctcggaagcgttacggtagcgtacttgtttggaacgaagtgcggtg  
gttcgactccaccccgagtgacca  
1-6tRNA-Asn(gtt)c[70593,70669]  
aggcaatgatctgactaggttggctctgactgttaatcacaagatgg  
gaggttcgaatcctctattgcctgcca  
1-7tRNA-Ile(gat)c[70821,70894]  
tgctcgttagcatagtggtaatgcaatcggctgataaccgatagagaggt  
gttcaattcactacgagcaacca  
1-8tRNA-Arg(acg)c[70901,70975]  
agtcgcttggccgattggattaggcaaaggtctacgaagccttttagagt  
ggttcgatcccactagtactacca  
1-9tRNA-Asp(gtc)c[71118,71193]  
ggctcattagtgttagcggtagcacgcttgactgtctatcaggaaggag  
gattcgaattccctatgagccgcca  
1-10tRNA-Glu(ttc)c[71198,71274]  
gtcctccatcgtctatctggctaggttctgactttcaatcagggaac  
aggggtcgaatccctgtgggagtacca  
1-11tRNA-Arg(tct)c[71504,71580]  
ggccttatagtgaagggaattagcacatcatccttctaagttgatagac  
ttggttcgaatccaagtagggctacca  
1-12tRNA-Gln(ttg)c[72332,72406]  
ggccggttggcgaagtgggaacgcagcgagctttgacctcgttatgagta  
ggttcgatccctacaccggacgcca

1-13tRNA-Val(tac)c[72754,72827]  
gcctcattagttcaatgggagaacgccatccttacaaggtggctacggtg  
gttcgattccatcatgaggcacca  
1-14tRNA-Leu(caa)c[72836,72922]  
ggggatatggcggaactggtattcgcagcaggctcaaaccctgtgggccg  
tgaggccatgtaggttcgactcctattatccccacca  
1-15tRNA-Ser(aga)c[72927,73016]  
ggcgagttgtagagtgacgattgctctagtttagaaaactagcgagtc  
agaaatggctccgtgggttcgaatcccacactcgctcca  
1-16tRNA-Ser(gct)c[73265,73354]  
ggcgtattggtcgagaggctgatgacagcgggttgctaaccctactctc  
cgaaaggggagcgaaggttcgaatccttcattcgccacca  
1-17tRNA-Lys(ttt)c[73360,73434]  
tgagcgaagctaagcggtcaggcatcggacttttaatccgaacatggtg  
ggttcgattcccactcgtccaacca

>KR422352.1 Escherichia phage APCEc01, complete genome

1-1tRNA-Met(cat)[110541,110614]  
ggccctgtagctcaatggtagcagcagtcacctcataagggaaaggta  
ccagttcgaatctggtctgggtca  
1-2tRNA-Arg(tct)[110621,110697]  
cgaggcatagctcaattgtatagagcaacggacttctaaccgtaggttg  
aaggttagaatccttctgtctcgacca

>KJ010547.1 Bacillus phage Bp8p-C, complete genome

1-1tRNA-Met(cat)c[106842,106913]  
gggtctttagcttaaaggtaaagcaatcagctcataactgataggatagg  
agttcgagtccttaggacca  
1-2tRNA-Tyr(gta)c[109352,109435]  
gggatagcgctaacttgagagttaggcgagactgtaaatctcgtgtcg  
gatcactgagtggttcgaatcccactgtcca  
1-3tRNA-His(gtg)c[109549,109619]  
gagaatgtagcttaacggtaaagcgtgggacgtgactccagttatccaa  
gttcgagtccttggtattctca  
1-4tRNA-Gly(tcc)c[109630,109703]  
gtggtcttagtttaacggtagaattgctggctccaaccagcggtaagg  
gttcgactcccttagaccatacca  
1-5tRNA-Met(cat)c[110832,110905]  
tacgatgctgaggggtcggtaaccgacgaggtctcataagcctgttttag  
caagtcaactcttccttagcaa  
1-6tRNA-Phe(gaa)c[110979,111053]  
tggaactgtagctcagtcggttagagcaggggctgaaaatccctgtgtcg  
gaggttcgaatccttctcagtcctat  
1-7tRNA-Asn(gtt)c[111433,111506]  
ttgtcgataactcaatggtagagtgtgactgttaatacaagaagttgt  
aggttcgagtcctactacgacagt

>KU297675.1 Pseudomonas phage PaoP5, complete genome

1-1tRNA-Gln(ttg)[21140,21213]  
tgccgcttcgttcaatggtaggacgccagacttgaatctggagatgatg  
gttcgatcccatcagtggtgccca  
1-2tRNA-Arg(tct)[21419,21494]  
gctcgtatagtgtaatggacagcacacggcttctaagccgtaaggtct  
aggttcgaatcctagtatgagcgcca  
1-3tRNA-Leu(tag)[22310,22394]  
gacctgtggtggaattggtatacacatcagctctagaaactgacgccga  
gaggattgaggggtcaagtcctccggggccacca  
1-4tRNA-Ile(gat)[22605,22680]  
agccggaatagctcaattggtagagcaccgaccgataatcggtggtga  
aggttcaagtccttctctggctacca  
1-5tRNA-Asp(gtc)[22690,22768]  
ggccattagctcagctctggactagagcaagcccctgtctagggaaggt  
cgtcgggttcgaatccgacatgggtcgcca  
1-6tRNA-Met(cat)[22869,22943]  
agcgttaagactggctggagctgtcactcggctcataaccgagcacaaat  
ggttcgattccacctctcgttcca  
1-7tRNA-Cys(gca)[23179,23254]  
cccgcggtggccgagaggttaggcggcggttgcaaatccgtctcacat  
cggttcaaatccgatacgcggtcca  
1-8tRNA-Asn(gtt)[23265,23340]  
tgggatgtagctcagttggtagagcaggagctgttaactctcaggtcgc  
aggttcgagccctgccgtcccagcca  
1-9tRNA-Pro(tgg)[23404,23481]  
ctcctcgtagctcagctcgttagagtgctggatttggaatccgaaggtc  
gaaggttcaaatccttcgggggtgacca  
1-10tRNA-Gly(tcc)[23653,23728]  
gcgggtatagctcagttggtagagcgtctgcctccaagcagttcgtcgt  
cgggtcagtcctctatccgtcca  
1-11tRNA-Phe(gaa)[23735,23810]  
gcatttgaagctaactaggtagaagcgtgggttgaaattccagaggact  
tggatcgttaccagcagatgcacca  
1-12tRNA-Glu(ttc)[23817,23892]  
gcagttatagattaattggttaaatgccagacttcaatctggtgttcc  
gggttcgatccccgtaactgctcca  
1-13tRNA-His(gtg)[23953,24027]  
gtggagattgttagcccgatgctgccttcggtgtgacccgattgtt  
ggggttcgagtcctccctccaacc  
1-14tRNA-Thr(tgt)[24214,24288]  
gccctttaagcatttggtgatgcaccgcttgaacccggcgaattc  
tgttcaaatcaggaatggggcacca

>KU130126.1 Pseudomonas phage vB\_PsyM\_KIL1, complete genome

1-tRNA-Ser(tga)[16011,16105]  
ggcttggaagccgagatggcctagcggcagcggcttgaaaaccgaggg  
ttcacggaagtggacgtgtgagttcgagctcacccaatccgcca  
1-2tRNA-Met(cat)[16112,16188]  
tggccttagcataattggtaatgcaatcaactcataattgataagata  
cgagttcaagtctcgtggggccaacca  
1-3tRNA-Arg(tct)[16759,16835]  
atctccatagctcaactggacagagcaagggtttctcacccaaggttg  
agggttcgaatccttctggggatacca  
1-4tRNA-Thr(tgt)[17460,17535]  
gccggaatagcacaattggtagtcagtcgccttgtaagcgaaaggtga  
gggttcaagtcctttttcggcacca  
1-5tRNA-Arg(acg)[17725,17799]  
agtcgcttggccgattggattaggcaaggccacgaagcctgctagagt  
ggttcgactccactagttactacca

>KT887559.1 Pseudomonas phage phi3, complete genome

1-tRNA-Met(cat)[2854,2930]  
gggcctatagctcagtcggttagagcagaggactcataatccttgggtcc  
acggttcgagtcggtgtggggccacca

>KU497559.1 Pseudomonas phage K5, complete genome

1-tRNA-Gln(ttg)[22291,22364]  
tgccgcttcgttcaatggtaggacgccagacttgaatctggagatgatg  
gttcgatcccatcagtggtcgcca  
1-2tRNA-Arg(tct)[22570,22644]  
gctcgtatagtgaacggatgcacaacggtcttctaagccgtaaggtcta  
ggttcgaatcctagtatgagcgcca  
1-3tRNA-Lys(ttt)[22652,22728]  
tggacggaagctaaagtggataggcatctggcttttaaccagatttatag  
tgagttcgagtcacccgttcaacca  
1-4tRNA-Leu(tag)[23003,23087]  
ggccctgtggtggaattggtatacacatcagtccttagaaactgacgccga  
gaggattgagggttcaagtcctccggggccacca  
1-5tRNA-Ile(gat)[23298,23373]  
ggccagatagctcaattggtagacaccgaccgataatcggtggttga  
aggttcaagtccttctctggccacca  
1-6tRNA-Asp(gtc)[23383,23461]  
ggcccattagctcagtcctggactagagcaagcccctgtctagggaaggt  
cgccggttcgaatccggcatgggtcgcca  
1-7tRNA-Cys(gca)[23718,23793]  
ccctcgttggccgagaggatcaggcagcagattgcaaatctgccatacat  
cggttcaaatccgatacagaggtcca  
1-8tRNA-Asn(gtt)[23803,23879]  
tccgtacggcccatcaaggcgtggggctcggtgttaaccgaaacgcgc  
taggttcgattcctaggtacggagcca

1-9tRNA-Pro(tgg)[23942,24019]  
 ctctcgtagctcagctcgttagagtgctggatttggaaatccgaaggctc  
 gaaggttcaaactcctccgggtgacca  
 1-10tRNA-Gly(tcc)[24027,24103]  
 gcgggttctgtatagctcgttattattcttggcttccaccaagagact  
 aggggtcgaatccctaagccccgacca  
 1-11tRNA-Phe(gaa)[24166,24241]  
 gcgtctgaagctaactaggtagaagcgtgggtgaaattccagaggact  
 tggatcgttaccagcagatgcacca  
 1-12tRNA-Glu(ttc)[24248,24323]  
 gcagttatagattaattggttaaatgccagactttcaatctggtgtcc  
 gggttcgatccccggttaactgctcca  
 1-13tRNA-His(gtg)[24384,24458]  
 gtggagattgtgtagcccgatgctgccttccggtgtgacccgattgtt  
 ggggttcgagtcctccctccaacc  
 1-14tRNA-Thr(tgt)[24645,24719]  
 gcccttaagcatttatggtgatgcaccggcttgaacccggcgaattc  
 tgttcaagtcaggaatggggcacca  
 >LC121084.1 Ralstonia phage RSP15 DNA, complete genome  
 1-1tRNA-Leu(caa)c[85007,85091]  
 ggggatgtggggaattggtagaccacactgactcaaaatcaggcgtga  
 aaggcgtgtgggttcgagtcaccatccctacca  
 1-2tRNA-Gly(tcc)c[85106,85183]  
 gcgggtataactcagtcgggtcagagtgacgctccaagctgttcgtc  
 atcgggtcaaactccgattaccgctcca  
 1-3tRNA-Ile(gat)c[85392,85468]  
 ggtggattagctcagttggttagagcatcgttgataaggcggggcca  
 taggttcaagtcctatatccaccacca  
 1-4tRNA-Thr(tgt)c[85589,85664]  
 gccacgttagcacaattggtagtcagcggatttgaatccgaaggttag  
 ggattcgatttctctacgtggcacca  
 1-5tRNA-Lys(ttt)c[87081,87157]  
 gagggtgtagctcaattggttagagcaacggacttttaatccgtaggttg  
 aggggtcgattccctccgcccacca  
 1-6tRNA-Trp(cca)c[87407,87481]  
 gggcggatagatataatggctattatgtcggtttccaagtccgaagattga  
 ggttcgattccttgtctgccgcca  
 1-7tRNA-Arg(tct)c[87489,87564]  
 gcggcattagctcaatggatagagcaagggtttctactccctaggtgt  
 ggggtcaagtcctgcatgccgcca  
 1-8tRNA-Gln(ttg)c[90562,90637]  
 cggggtgtagttcagttggtagaacagcgggtttgatccgtaggtcgt  
 aggttcgagtcctaccgcccctgcca  
 1-9tRNA-Met(cat)c[90734,90809]



ggtaatatagttcagttggtagaacagcagattcataatctgtaccgcgc  
 tggftcaaatccagctattaccacca  
 1-10tRNA-Val(tac)c[91136,91210]  
 gggaaattagctcagaggcagagcagcgcccttacaaggcgaaggtcggg  
 gtttcgatatcctcatttctacca  
 1-11tRNA-Asn(gtt)c[91439,91515]  
 tccgtagtagctcagtcggtagtagcggttcgctgttaagcgaaggtcg  
 gtggatcgtagccaccctacggagcca  
 1-12tRNA-Leu(tag)c[92265,92350]  
 gcgcgagtgatggaattaggtagtcttctgtgccttagaagcatgggcct  
 tcgggcgtgtcgggtcagtcggaccttgcgcacca  
 1-13tRNA-Phe(gaa)c[92665,92740]  
 gcgcgggtagctcagttggtagagcgccagcctgaagagttgggcgtcgg  
 aggttcgatcccttccccgcgcacca  
 1-14tRNA-Tyr(gta)c[92941,93022]  
 ggggttgatgctctaattggtaggcagcgggctgaaccccgtaggcttcg  
 gcaagtaggttcgatccctactcaaccacca  
 1-15tRNA-Pro(tgg)c[93034,93108]  
 ccgtggttagcctagaggtcaggcacttgattgggatcaagacgacgaa  
 ggttcgatcccttcatcacggacca  
 1-16tRNA-Asp(gtc)c[93341,93416]  
 ggtccaaaagtgttatggacgcacacatgcctgtcacgcatgtagagt  
 gggatcgtagcccccctggaccgcca  
 1-17tRNA-Cys(gca)c[93434,93507]  
 gtgagttggccgagtgactaggcgataggctgcaaccctatctaggaaa  
 gttaaaatctttcaattcactcca  
 1-18tRNA-Glu(ttc)c[93924,94002]  
 gtccgcatagtttacggtaggttagaacacatgcctttcacgcatgtaa  
 atcgggttcgaccccgatgtggacgcca  
 1-19tRNA-Ser(gct)c[94108,94198]  
 ggaagattggcagagtgccgattgcagcgggtgctaaccgtagggtc  
 tgaataaggctccataggttcaaatcctatatcttccgcca  
 1-20tRNA-Ser(tga)c[94946,95038]  
 ggaagctttagccgagatggcctagcggcagcggtcttgaaccgaagg  
 ctccgaaagggtgtgtgagttcgagttcacagcttccgcca

>KU253712.1 Bacillus phage Eldridge, complete genome

1-1tRNA-Asn(gtt)[31289,31363]  
 tcctccttagccaagtggtaaggcatcacactgttaatgtgactatcgca  
 agttcgaatcttcaggaggagcca  
 1-2tRNA-Trp(cca)[31366,31439]  
 tatcggctagtgtaatggtagcacagaggttccaaaacctttagtctg  
 ggttcaaatcctagggtggtgtc  
 1-3tRNA-Met(cat)[31833,31904]  
 atcttttagctcagtggttagagcgcccactcatattcggaaggtcgtt

ggttcaaaccaaccagagata

>AB930182.1 Bacillus phage SPG24 DNA, contig00001 sequence

1-tRNA-Ser(gct)[108723,108811]

tggataggtaccaagcggtaaagggctctggttgctaaccagatagtag

gctgaggtctagcggaggttcgaatcctcctatccgt

1-2tRNA-Asn(gtt)[109047,109120]

ttgtcccatagctcaatggtagagcgcccgactgttaatcggaaggtgc

tggtcgagcccagctgggacagt

1-4tRNA-Asp(gtc)[110903,110976]

tggctccatagtcagcggttaacacgcccgcctgtcacgtgggtagcac

gggttcgaatcccgttgagccgt

1-5tRNA-Tyr(gta)[111142,111225]

gggtgagcggtaacgttgagagttacggcagactgtaaactgttcctt

tcggggtagagtgtcgaatcactccttacc

>KX130861.1 Shigella phage SHFML-11, complete genome

1-tRNA-Arg(tct)c[16071,16147]

cgaggcatagctcaattgtatagacaacggacttctaaccgtaggttg

aaggttagaatccttctgcctcgacca

1-2tRNA-Met(cat)c[16858,16929]

ggccctgtagctggaaggtcaagcaagcgactcataatcgccagatggt

ggtcaattccaccaggcca

1-3tRNA-Thr(tgt)c[16936,17008]

gctgatttagctcagtaggttagacaactcacttgaatgagaaggtcgg

cggttcgattccgtcaatcagca

1-4tRNA-Ser(tga)c[17015,17103]

tggaggcgtggcagagtggttaatgcaccggtctgaaaaccggcagtc

gctccggcgactcataggtcaaactcctatcgctccgt

1-5tRNA-Pro(tgg)c[17104,17178]

cttcgttagctcagtttgtagagcgtctgcttgggagcagaatgtcg

caggttcaaatcctgcccgagac

1-6tRNA-Gly(tcc)c[17191,17262]

gcggatatgtataatggtattacctcagactccaatctgatgatga

gttcgattctcattatccgtc

1-7tRNA-Leu(taa)c[17269,17355]

gcgagaatggtaaattggtaaagacacagcacttaaaatgctgcggaat

gatttccttggtggttcgagtcctcctctctac

1-8tRNA-Gln(ttg)c[17356,17429]

tgggaattagccaagttggaagcatagcacttgactgctagatgcaa

aggttcgagtccttattccagc

>KX397366.1 Erwinia phage vB\_EamM\_ChrisDB, complete genome

1-tRNA-Trp(cca)[977,1052]

agggaagtagctcagcaggcagagcgctggtctccaaaaccagatgtcgc

aggttcgattcctgtcttccctgcca

1-2tRNA-Cys(gca)[1369,1444]

ggggcaatggctcgagcggtcaggcgctagattgcaaatctggattacgg  
 gggttcaattccctcttggccctcca  
 1-3tRNA-Tyr(gta)[3038,3123]  
 ggcgcggtactcaagcggtaacgagagcagactgtaaatctgttgccct  
 cgggcttcgtaggttcaaatcctccctcgccacca  
 1-4tRNA-Gln(ttg)[3130,3204]  
 aggggtatagccaagcggtaagggccagggtttgatccctgtatgctct  
 ggttcaaatccagatgcccctcca  
 1-5tRNA-Ile(gat)[3211,3287]  
 tgtctcgtagctcagttggtcagagcgtcgctgataagcgggaggtca  
 gtggttcaagtccactcgagacaacca  
 1-6tRNA-Met(cat)[3292,3367]  
 ggttctgtagctcagtcggtagagcacgccactcataatggcgcggtcgt  
 tggttcgataccagccggaaccacca  
 1-7tRNA-Glu(ttc)[3573,3648]  
 tctcccatcatctagcgggtctaggatcgccgcctttcgagcggttaaccg  
 gggttcaaatccccgtgggagaacca  
 1-8tRNA-His(gtg)[3918,3994]  
 gtgtacgtagttcagttggttagaattctggcttgtagcgtcggaggtcg  
 agggttcaagtcctccgtacacccca  
 1-9tRNA-Asp(gtc)[4000,4075]  
 agtgccgtagtcgagtggttaagacgtcccctgtcacgggagagatcgt  
 gggttcaaaccatcggcactgccca  
 1-10tRNA-Ser(gct)[4081,4168]  
 ggagaattgaccgagaggccgaaagtgtcccctgctaaggagtggtcc  
 ttagggggccgaaggttcgaatccttcattctccgcca  
 1-11tRNA-Asn(gtt)[4446,4522]  
 ggttccatagctcagttggttagagcggctgcctgttaagcagtaggtcc  
 ctggttcgagtcaggtggtaccgcca

>KR269720.1 Klebsiella phage PKO111, complete genome

1-1tRNA-Thr(tgt)c[85,160]  
 gccgatttagctcagctggttagagcgcttcacttgtaataagatgtcgc  
 ggggttcgactcctgcaatcgccacca  
 1-2tRNA-Leu(taa)c[261,345]  
 gcatcgatgggtggaactgggtatacacatagcactaaaatgctacgccgc  
 aaggattgagggttcgaatccctctcggtgcacca  
 1-3tRNA-Arg(tct)c[350,426]  
 cggggcatagctcagctggatagagcagcggacttctaaccgcaggtcg  
 aaggttcgaatcctctgcctcgacca  
 1-4tRNA-Met(cat)c[2039,2113]  
 ggccctgtagctcaatggttagagcacgcaactcataattgctagtttct  
 ggttcgagtcaggctgggtcacca  
 1-5tRNA-Pro(tgg)c[3381,3457]  
 ctccgtatagctcagtcggttagagcgtccatttgggatggagaggtcg

aatgttcgagtcattctatggagacca  
 1-6tRNA-Gly(tcc)c[3463,3537]  
 gcatccatcgtatagcggatattatgtctggctccaccagaagatagg  
 agttcgattctccttggatgctcca  
 1-7tRNA-Trp(cca)c[3543,3617]  
 aggttcttagtataacggctattatgctgggctcaaaccagtgatgag  
 gggtcgattccttcagggcctgcca  
 1-8tRNA-Ile(gat)c[3624,3699]  
 gggagtagtagctcatttggtagagctctcgaccgataatagagcggtag  
 tggttcgagtcagttactcccacca  
 1-9tRNA-Ser(tga)c[3766,3850]  
 ggagagtagcgtagtggttagcaaaccggacttgaaatccgggccatcgg  
 aaacggtagagggttaactccttactctccgcca  
 1-10tRNA-His(gtg)c[3948,4023]  
 gtgtcgtagttcagttggtagaaccgaggtgtgatcctcgatgtcac  
 ggattcgaattccgtcgccacccca  
 1-11tRNA-Gln(ttg)c[4119,4193]  
 tgaatcatagccaagttggtaggcagtaggtttgatcctacgatccct  
 gggtcgagtcagggtggtcagcca  
 1-12tRNA-Met(cat)c[4200,4276]  
 tgcggagtaacttcagttggtagaatgtgggctcatatcccacacgcg  
 caggttcgattcctgcctccgcctcca  
 1-13tRNA-Asp(gtc)c[4438,4513]  
 ggacctatagtttcagcgggtaaaatactgcctgtcacgcgagagtcac  
 ggattcgaattccgttaggtccgcca  
 1-14tRNA-Asn(gtt)c[4767,4851]  
 gggctggtggctgagagggaagcgacggactgtaatccgtgtcagaaa  
 tgactaggcaggttcgatactgcacggcccgcga  
 1-15tRNA-Lys(ttt)c[4857,4933]  
 gggatactagctcagttggttagagcaccggactttaatccgggtgtcc  
 gaagttcgagtcctcggtgtcccacca  
 1-16tRNA-Tyr(gta)c[4940,5026]  
 ggggagttagaccgtagggtagcgggacagactgtaaatctgtgtctca  
 aaaggctcgagtggttcgactccattactcccacca

>KU878088.1 Bacillus phage AR9, complete genome

1-1tRNA-Asn(gtt)[208904,208977]  
 ttccccttagctcaatggttagagcatctcactgttactgagatggttgc  
 aagttcgagtccttcagggggagt

>KX147229.1 Bacillus phage Belinda, complete genome

1-1tRNA-Asn(gtt)[33227,33300]  
 gtgctttagctcagtcggttagagctggtggctgtaaccactgtgtcgt  
 aggttcgattcctacctagcacgc  
 1-2tRNA-Glu(ttc)[33307,33383]  
 gtgcattggtgaaattggctaacacactcggttctaccgaggattta

ggggttcgagccccctatgcgattcca  
1-3tRNA-Asp(gtc)[33388,33461]  
tggggatatagtgtagaggtaaacacgcacggctgtctaccgtgaagcac  
gagttcgaatctcgttatcctcgt

>KX009778.3 Escherichia phage UFV-AREG1, complete genome

1-1tRNA-Asn(gtt)c[68817,68891]  
ggatgtgtagctcagtggttagagcagttgactgttaataatgggtccat  
ggttcgaatccatgcatgtccgcca  
1-2tRNA-Tyr(gta)c[68896,68982]  
ggggagtatcccgtagaggtagcgggtggactgtaaatccattgtcat  
tgcgactcgggtggttcgactccatcactccccacca  
1-3tRNA-Met(cat)c[68992,69068]  
ggccctgtagctcaatggttagcagcagtcacctcataagggaaggta  
ccagttcaaatctggtctgggtcacca  
1-4tRNA-Thr(tgt)c[69070,69145]  
gctgatttagctcagtaggttagagcacctcactgtaatgaggatgtcgg  
cggttcgattccgtcaatcagcacca  
1-5tRNA-Ser(tga)c[69147,69235]  
tggaggcgtggcagagtgggttaatgcaccggtcttgaaccggcagtc  
gctccggcgactcataggttcaaactctatcgctccgt  
1-6tRNA-Pro(tgg)c[69236,69310]  
ctccgtgtagctcagtttgtagagcgctgattgggatcaggagggtcc  
aaggttcaaatccttgtatggagac  
1-7tRNA-Gly(tcc)c[69902,69975]  
gcggatatcgataatggcattacctcagacttcaatctgatgtga  
gttcgattctcattatccgtcca  
1-8tRNA-Leu(taa)c[69982,70068]  
gcgagaatggtaaattggtaaaggcacagcacttaaaatgctgcggaat  
gatttccttggtggttcgagtccttctctgtacca  
1-9tRNA-Gln(ttg)c[70069,70142]  
tgggaattagccaagttgtaaggcatagcactttgactgctagatgcaa  
aggttcgagtcctttattcccagc  
1-10tRNA-Arg(tct)[169204,169280]  
cggggtgtaactcaattgtatagtagcggctcttaaaccgcaggtta  
aaggttagaatcctttaccctggcca

>KU761955.1 Pseudomonas phage phiMK, complete genome

1-1tRNA-Thr(tgt)c[67352,67426]  
gccctttaagcatttatggtgatgcaccggcttgaacccggcgaattc  
tgtcaagtcaggaatggggcacca  
1-2tRNA-His(gtg)c[67613,67687]  
gtggagattgtgtagcccgatgctgcctttcggtgtgacccgattgtt  
ggggttcgagtcctccctcaacc  
1-3tRNA-Glu(ttc)c[67748,67823]  
gcagttatagattaattggttaaatgccagactttcaatctggtgtcc

gggttcgatccccgtaactgctcca  
1-4tRNA-Phe(gaa)c[67830,67905]  
gcatttgaagctaactaggtagaagcgctgggttgaaattccaggagact  
tggatcggtaccaagcagatgcacca  
1-5tRNA-Gly(tcc)c[67912,67987]  
gcgggtatagctcagttggtagagcgtctgcctccaagcagttcgtcgt  
cggttcgagtcgctctatccgctcca  
1-6tRNA-Pro(tgg)c[68159,68236]  
ctcctcgtagctcagttcggttagagtgctggatttggaaatccgaaggtc  
gaaggttcaaatacctccgggtgacca  
1-7tRNA-Asn(gtt)c[68299,68374]  
tgggatgtagctcagttggttagagcaggagctgttaactctcaggtcgc  
aggttcgaaccctgccgtcctagcca  
1-8tRNA-Cys(gca)c[68385,68460]  
ccccggttgccgagaggtttaggcggcgattgcaaatacgtctcacat  
cggttcaaatacgtacgcggctcca  
1-9tRNA-Asp(gtc)c[68916,68994]  
ggccattagctcagttcggttagagcaagcccctgtctagggaaggt  
cgccggttcgaatccggcatgggtcgcca  
1-10tRNA-Ile(gat)c[69004,69079]  
ggccagatagctcaattggttagagcaccgaccgataatcgggtggttga  
aggttcaagtccttctctggccacca  
1-11tRNA-Leu(tag)c[69290,69374]  
ggcctgtggtggaattggtatacacatcagtttagaaactgacgccga  
gaggattgagggttcaagtcctccggggccacca  
1-12tRNA-Arg(tct)c[69732,69806]  
gctcgtagtataacggatgcacaacggtcttctaagccgtaaggtcta  
ggttcgaatcctagtagagcgcca  
1-13tRNA-Gln(ttg)c[70012,70085]  
tgccgcttcgttcaatggttagagcggcagacttgaatctggagatgatg  
gttcgatcccatcagttggctgcca

>KU760857.1 Salmonella phage SJ46, complete genome

1-1tRNA-Met(cat)c[98316,98391]  
ggccctttagctcagttggttagagctggcgactcataatgcacgggtcac  
cggttcaagtcggtaggggcca  
1-2tRNA-Thr(tgt)c[99544,99619]  
gccggtttagctcagttggttagagcgctgccttgaagcaggatgtcag  
cggttcgagtcggttaatcgccacca  
1-3tRNA-Asn(gtt)c[99622,99697]  
gatggttagctcagcggttagagcggttgactgttaatcaacgggtcga  
tggttcaaatacctccaccatcgcca

>KU867876.1 Escherichia phage vB\_EcoM-UFV13, complete genome

1-1tRNA-Arg(tct)c[69811,69886]  
cgaggcatagctcagaaggaagagcaaggaccttctaagtcctaggtcgt

aggttcgatccctactgcctcgacca  
 1-2tRNA-Asn(gtt)c[69891,69965]  
 ggatgtgtagctcaatggcagagcgatcgctgtaagcgattggtata  
 ggttcgaatcctatcacgtccgcca  
 1-3tRNA-Tyr(gta)c[69970,70056]  
 ggggagttatcccgtagaggtagcgggtggactgtaaatccattgtcat  
 tgcgactcgggtggttcgactccatcactccccacca  
 1-4tRNA-Met(cat)c[70069,70143]  
 ggccctgtagctggaaggtcaagcaagcgactcataatgccagatggt  
 ggtcaattccaccagggccacca  
 1-5tRNA-Thr(tgt)c[70145,70220]  
 gctgatttagctcagtaggtagagcaactcacttgtaatgagaaggtcgg  
 cggttcgattccgtcaatcagcacca  
 1-6tRNA-Ser(tga)c[70226,70315]  
 ggaggcgtggcagagtgtttaatgcaccggtcttgaaaaccggcagtcg  
 ctccggcgactcataggttcaaatcctatcgctccgcca  
 1-7tRNA-Pro(tgg)c[70317,70391]  
 ctccgtgtagctcagtttggtagagcgctgattgggacaggagggtcc  
 aaggttcaaatccttgatggagac  
 1-8tRNA-Gly(tcc)c[70402,70475]  
 gcggatatcgataatggtattacctcagacttccaatctgatgtga  
 gttcgattctcattatccgtcca  
 1-9tRNA-Leu(taa)c[70481,70567]  
 gcgagaatggtcaaattggtaaaggcacagcacttaaatgctgcggaat  
 gatttccttgggttcgagtcaccacttctcgcacca  
 1-10tRNA-Gln(ttg)c[70568,70641]  
 tgggaattagccaagttggttaaggcactggatttgattccaggatgcaa  
 aggttcgagtcctttattcccagc

>KX397369.1 Erwinia phage vB\_EamM\_Kwan, complete genome

1-1tRNA-Gly(tcc)[1976,2051]  
 gcaggcatagctcagttggtagagcatctgattccaatcagagggtcgt  
 cagttcgaacctgactgtctgtcca  
 1-2tRNA-Tyr(gta)[2256,2340]  
 ggcgggttactcaagcggcaacgagagcagactgtaaatctgttgacttc  
 ggtcttcgggtggttcgagtcaccacacgccacca  
 1-3tRNA-Glu(ttc)[2346,2420]  
 acacccatcgtctagcggtaggaccgctgccttcgagcagttaaccgg  
 ggttcaaatccccgtgggtgtacca  
 1-4tRNA-Glu(ttc)[2424,2499]  
 attcccgatctagtggtaaggatacgacatttcactgtcggtacac  
 gatttcgagtcctcgtcgggaatacca  
 1-5tRNA-Trp(cca)[2623,2698]  
 agggaagtagttcaattggtagagcgtcggtctccaaaaccggtgttg  
 aggttcgagtcctctcttccctgccca

1-6tRNA-Asp(gtc)[2705,2781]  
 aggactgtagctcagacggtagagtgccgccctgtcacggcggaggtcg  
 cgggttcgaaacccgtcagtcctgccca  
 1-7tRNA-Ser(gct)[2787,2876]  
 ggagaattggatgagtggttaagtcgctcccctgctaaggaggtatc  
 cgaaagggtaccgttggttcgaatccaacattctccgccca  
 1-8tRNA-Asn(gtt)[3253,3328]  
 tggatgattgttcagtcggtagaacagtggtgtaatacatatgtcgc  
 aggttcgattcctgcatcaccagcca  
 >KX397364.1 Erwinia phage vB\_EamM\_Asesino, complete genome  
 1-1tRNA-Trp(cca)[613,688]  
 gggggagtagttcaactggtagagcgtcgggtccaaaaccgaatgtgc  
 aggttcgagtcctgtctcccctgccca  
 1-2tRNA-Cys(gca)[1007,1082]  
 ggggcaatggctcagtggttaggcgacgaattgcaaattcggatcaggt  
 cgggtcaagtcggcgttgcctccca  
 1-3tRNA-Gly(ccc)[3308,3383]  
 gcgagtatagctcagctggttagagcatctggttcccaaccagagggtcgt  
 gattcgaatctcattactcgtcca  
 1-4tRNA-Tyr(gta)[3492,3577]  
 ggcgcggtactcaagcgggtcaacgagcagactgaaatctgttgccct  
 cgggcttcgtaggttcaaatacctccctcgcaccca  
 1-5tRNA-Glu(ttc)[3584,3659]  
 gttcctgtcgtctagtggtccaggacacctggttttcaaccaggcaaccg  
 gattcaattctccgcaggaacgccca  
 1-6tRNA-Asp(gtc)[3815,3891]  
 agagccgtagtcgagttggttaagacgcctccctgtcacggaggagatcg  
 tgggttcgagcccatcggttctgccca  
 1-7tRNA-Ile(gat)[4027,4103]  
 tgtctcgtagctcagttggttagagcgtcgcctgataagcgggaggtcgt  
 gtagttcaagtctactcagacaacca  
 1-8tRNA-His(gtg)[4199,4275]  
 gtgtatgtagttcagctggttagaatactggcttgacgtcagtggtcgt  
 agagttcgagtcctccatacacccca  
 1-9tRNA-Ser(gct)[4281,4370]  
 ggagaattgtccgagtggtgaaagagctcccctgctaaggagtggtgg  
 cgcaagctgcccgaaggttcgaatccttcattctccgccca  
 1-10tRNA-Met(cat)[4506,4579]  
 aaccggttagcttgaggaaaaagcaccgaccataatcggtttttcac  
 tgggtcgaatccagtcacgggttc  
 1-11tRNA-Asn(gtt)[4589,4664]  
 gactctgtagttcagttggtagaacggatgactgttaattatctcgtcgc  
 aggttcgagtcctgccggagtcgccca  
 >KU737349.1 Bacillus phage DIGNKC, complete genome



1-tRNA-Asn(gtt)[33193,33266]  
gtccttagctcagtcggtagagctggctggttaaccactgtgtcgt  
aggttcgattcctacctagcacgc

1-2tRNA-Glu(ttc)[33273,33349]  
gtcgcattggtgaaattggttaacacactcggttctaccgaggattta  
ggggttcgagccccctatgcgattcca

1-3tRNA-Asp(gtc)[33354,33427]  
tggggatatagtgtagaggtaaacacgcacggctgtctaccgtgaagcac  
gagttcgaatctcgttctcctcgt

>KX245890.1 *Citrobacter* phage vB\_CfrM\_CfP1, complete genome

1-tRNA-Met(cat)[51490,51567]  
ggcccccttagctcaattggttagagcgaaccctcataagggtgtggtt  
ccggttcgagtcacggaaggggccacca

>KX078569.1 *Morganella* phage vB\_MmoM\_MP1, complete genome

1-tRNA-Met(cat)c[62923,62996]  
tgcgagatagtgaagggtctcacagaggttcagccctcgaaacctta  
gttcgaatctaggtctcgttcca

1-2tRNA-Glu(ttc)c[63866,63940]  
gcacctatcgtctagtggtaggacatcaggtttcaacctggcaaccgg  
agttcaattctccgtaggtgtacca

1-3tRNA-His(gtg)c[63946,64021]  
gtggccgtaattcagttggtagaatccctgattgtgattcaggcagtcac  
cgggtcgaagccggtcggtcacccca

1-4tRNA-Ser(tga)c[64083,64172]  
agcgggttggccgagaggcttatggcgctggtcttgaaaaccagaggacg  
ggaaaccgttccgtgagttcgaatctcacaccgctgccca

1-5tRNA-Pro(tgg)c[64380,64456]  
ctgtacgtagcgcagtcgttagcgtaggtgcttgatgcacgggtcg  
gaggttcgaatcctcccgtacagacca

1-6tRNA-Asn(gtt)c[64462,64536]  
tgacctatcgataaaggctattacggtaggaccgttaatccacttatcct  
ggttcgagtcagggtgggtcagcca

1-7tRNA-Lys(ttt)c[65250,65323]  
gcgtcgttagctcagctggttagagcatccgacttttaacggaatgtcg  
gtagttcgaatctaccacgacgca

1-8tRNA-Trp(cca)c[65619,65692]  
aggtcggtagttcaatggtagaatagcggattccaaatccgaagacgaga  
gttcgactcttctcggcctgccca

1-9tRNA-Arg(tct)c[66403,66479]  
gcactcttagctcagctggatagagcaacggccttctaagccgtaggtca  
caggttcgaatcctgtaggggtgtgccca

1-10tRNA-Leu(taa)c[66487,66571]  
gtctgagtggtggaactggtatacacaggagattaaaatctccgcctt  
atggattgtgggttcaaatcccaccttgacacca

1-11tRNA-Met(cat)c[66763,66835]  
 ggcccttagcttactggttgaaagctgacgactcataatcgtagagca  
 tggttcgattccatgaaggcca  
 >KX130863.1 Shigella phage SHSML-45, complete genome  
 1-1tRNA-Met(cat)c[55871,55946]  
 agttagtggcagagtggttatgcacctccttcatacggagcgactacag  
 tggttcaatccactactaactacca  
 1-2tRNA-Ile(gat)c[56043,56119]  
 gcttcgtagcttagcgatctaaagcactcggctgataaccgagagatcg  
 ggggtttaaaccctcccgagtacca  
 1-3tRNA-Asp(gtc)c[57205,57281]  
 gcgaccgggctggcttgtaatgttactcccctgtcacggagggaatg  
 tggttcaatcccatcggtcgcgcca  
 1-4tRNA-Asn(gtt)c[57579,57661]  
 gggctgtagccaagcggttggcggcgattgtaatccgtgacgaaag  
 acaacgtagggtcgaatcctacacggcccgcca  
 1-5tRNA-Cys(gca)c[57814,57889]  
 cgaccgttggctgaatggcttaggcgaaggattgcaaatccttttatgt  
 gattcaaatctcatcggtcgcca  
 1-6tRNA-Tyr(gta)c[58407,58490]  
 gcatcgtagcagaatgtctattgcagcggctgtaaatccgtgcccttc  
 ggggttggtggttcaaatccatcacgatgcacca  
 1-7tRNA-Met(cat)c[59367,59441]  
 gggctgtagcttaaagttaaagcggtaggcctcataagctaacgagtagg  
 agttagattctctccgaccacca  
 1-8tRNA-Ser(gct)c[59448,59536]  
 ggaagaatagcataacggattgcagcagattgctaattctgcggttga  
 aatatagccttgggttcgattcccccttctccgcca  
 1-9tRNA-Arg(tct)c[61548,61622]  
 cggggtgtagtctaaggagaggcaggagtcttctaaattcctttatgca  
 ggttcgaatcctgtcacctcgcca  
 1-10tRNA-Ser(act)c[62123,62196]  
 tccgatctagtataaacggtattatcaagccgtaactggtggaagatgt  
 aggttcgaatcctacggtcggtaa  
 >KX438380.2 Salmonella phage vB\_SalM\_PM10, complete genome  
 1-1tRNA-Met(cat)[101837,101913]  
 ggtcctgtagctcagtggttaagtagcagtgaactcataattcattggtcg  
 ttggttcaaatccaaccaggatcacca  
 1-2tRNA-Asn(gtt)[102153,102228]  
 gacgatgtagttcagtcggtagaacggcggctgttaaacgtatgtcgc  
 aggttcaagtcctgccatcgtcgcca  
 1-3tRNA-Tyr(gta)[103283,103366]  
 gtgagtgtggcagagcggcgaatgcaggagactgtaaatctccccgtaa  
 cagcgggtggttcaaatccatccactcacacca

1-4tRNA-Ser(gct)[103443,103531]  
 ggaaggttccccgagaggtttaaggactcgactgctaatacgagtggggc  
 ttttagccccgaaggttcgaatccttcacctccgcca

>KX231828.1 Enterobacter phage Arya, complete genome  
 1-1tRNA-Arg(tct)c[25273,25349]  
 ggccccatagctcaaccggatagagcgacagccttctaagctgtaggttc  
 caggttcgattcctgggtgggtcgcca

>KX377933.1 Escherichia phage vB\_EcoM\_Alf5, complete genome  
 1-1tRNA-Pro(tgg)[24208,24284]  
 ctctgttagctcagcttggtagagcgttcggttggggcggttaaggccg  
 gaggttcaagtctccaacagagacca  
 1-2tRNA-Glu(ttc)[24292,24369]  
 gttccagtagacaaaatggtaaagtcaccactcttcaaagtgatattt  
 gagggttcaaatcccttctggaacgcca  
 1-3tRNA-Met(cat)[24460,24536]  
 tgcgggtatagagaaaggcgctctcacatgtctcattagcatggatcgg  
 caggttcgactcctgcacccgcctcca  
 1-4tRNA-Asn(gtt)[24620,24696]  
 ggttaggaagcacataaggtatgtcgggtcgctgttaagcgaatggcac  
 agggttcgaatccctgactaaccgcca  
 1-5tRNA-Tyr(gta)[24766,24853]  
 gtgtcgttatcccgtagatggtagcgggtgggactgtaaatccctgtca  
 ttgagactcggtaggttcgactcctacacggcacacca  
 1-6tRNA-Asp(gtc)[24859,24936]  
 ggttatgtagttaatttggtaaaatactcccctgtcacgggagatgat  
 gagggttcaaatccctcgtagccgcca  
 1-7tRNA-Lys(ttt)[25365,25440]  
 ggaagtgtagcagaatggtgatgcggcagacttttaatctgacaggcgat  
 gggttcgaatccctccactctacca  
 1-8tRNA-Met(cat)[25445,25521]  
 ggttcagtcgcagataaggtaatgcaagggtctcataagccctatgaatg  
 tgggttcgattcccatctgaacctcca  
 1-9tRNA-Ile(gat)[25523,25598]  
 gctggtatagttaagaaggttataacactcccctgataagggaacatcgg  
 tgggtcgattccacctaccagtacca  
 1-10tRNA-Ser(tga)[26524,26613]  
 ggtaggtagcggctaattggtagccaaactgtcttgaaaacagttgccact  
 gtagagatacggtaggggttcgactccttactaccgcc  
 1-11tRNA-Leu(tag)[26869,26946]  
 gggagattgacggtaattggtaaacctaccatcctagaagttggtgtt  
 gagggttcgaatccctgtctctacca  
 1-12tRNA-Lys(ctt)[26954,27029]  
 gcaggttagcaaaatggttatgcggctgactcttaatcagtaagacgac  
 gggttcaatccctccacctgtacca

1-13tRNA-Ala(tgc)[27035,27110]  
 ggggtcatagtttatatgggtaaaattcgagtttgcaaacttgggaact  
 gattcaattctcagtactccacca  
 1-14tRNA-Gly(tcc)[27117,27191]  
 gcatccatagtttaaacgggaaaattacagttcttccaaactgaggttgag  
 ggttcgattccctctggatgctcca  
 1-15tRNA-Thr(tgt)[27199,27274]  
 gctcctatcgtataatcggctattacggttgcttgtaagcaacttatca  
 ggggtcgaatccttggggagcacca  
 1-16tRNA-Val(tac)[27370,27444]  
 actcgcttagtttataggtaaaacatcaccttacaagatgaagaaaaa  
 ggttcaagtccttagtgagtacca  
 1-17tRNA-Leu(caa)[27446,27523]  
 gttccagtatcccaattggcagaggatgaagctcaaacctgtattagt  
 gacggttcgaatccgtcttggaaacacca  
 1-18tRNA-Gln(ttg)[28108,28183]  
 aggggattagttacaaggttaaacctcggctcttgaaatcgaagaagt  
 tgggtcaattccaacalcccccgcca  
 1-19tRNA-Leu(taa)[28186,28264]  
 gctccattactccaattggcagagaggccagacttaaaatctgtttatg  
 tatcgggtcgaatccgatatggagtacca  
 1-20tRNA-Gln(ctg)[28270,28345]  
 agcggtatagcataactggcaatgcagcagctctgaagctgtcctatta  
 aggttcaaatccttatgccgtgccca  
 1-21tRNA-His(gtg)[28377,28452]  
 gtggccttatcataaatggtaatgacccatgctgtgaacatggctctatac  
 ggggtcgactcccgtaggtcacccca  
 1-22tRNA-Phe(gaa)[28459,28534]  
 agtccaagtagcttatatggttaaagcgcgtgtctgaaaaacatgagaag  
 agggttcaaatcccactggactacca  
 1-23tRNA-Ser(gct)[29287,29379]  
 ggaagattaaccctaaaaggtaaggagcagtttgctaaactgccagtag  
 ctgagaaatcggtgtaccagttcaagctggtatcttctcca  
 1-24tRNA-Cys(gca)[29384,29459]  
 gaatccgtgacagaaatggatatgtgcctgtctgcaaaacaggtttataa  
 ggggtcaagtccttcggattctcca

>KU737348.1 Bacillus phage Zuko, complete genome

1-1tRNA-Asn(gtt)[33777,33850]  
 gtgcttagctcagtcggtagagctggtggctgtaaccactgtgtcgt  
 aggttcgattcctacctagcacgc  
 1-2tRNA-Glu(ttc)[33857,33933]  
 gtgcgattgggtgaaattggctaacacactcggctttctaccgaggattta  
 ggggttcgagccccctatgcgattcca  
 1-3tRNA-Asp(gtc)[33938,34011]

tggggatatagtgtagaggtaaacacgcacggctgtctaccgtgaagcac  
 gaggtcgaatctcgttatcctcgt  
 >KR233164.1 Salmonella phage NR01, complete genome  
 1-1tRNA-Ser(gga)c[108,201]  
 ggaaaagcaaatagattggtgactaaacccgattggaaatcggttgagt  
 gtagcaataccgccttatgggttcaactcccatctttccgcca  
 1-2tRNA-Leu(tag)c[208,292]  
 gggtagtggtgtaatgggtagccacgagggtcttagaagcccttgctta  
 agtgcgtgagagttcagagtcctcctaaccacca  
 1-3tRNA-Ala(tgc)c[299,373]  
 gggcgaatagtgtagcgggagcacaccagacttgcaatctggtagggag  
 ggttcgagtcctctttgtccacca  
 1-4tRNA-Pro(tgg)c[1124,1201]  
 cagggtgaagggtgataaggtacgccacctcggttggggcgaggaaatctt  
 tagagttcgaatctctataccctgacca  
 1-5tRNA-Asp(gtc)c[1583,1657]  
 ggtactatagtctaacggtaggatactcccctgtcacgggagagatagg  
 gtttcgattacccttagtaccacca  
 1-6tRNA-Asn(gtt)c[1956,2038]  
 gggcgttagccaagcgggttggcggcgattgtaatccgtgtcgaaag  
 acaacgtagggtcgaatcctacacggcccgcca  
 1-7tRNA-Met(cat)c[2633,2707]  
 gggcggtagcttaaagttaagcgggtggcctcataagctaagtagtagg  
 agttagattctcctccgaccacca  
 1-8tRNA-Ser(gct)c[2714,2807]  
 ggaagattaaccctaaaggtaaggagctgttgctaaacagccagtaac  
 tgtggaacacgggtgcccagttcagagtcgtgcattctctcca  
 1-9tRNA-Arg(tct)c[6350,6426]  
 gctccgttggccaaattggataaggcaagatcgttctaagttcttgatta  
 ggggttcgaatcccttacggagtacca  
 >KX258185.1 Klebsiella phage vB\_KpnM\_KpV477, complete genome  
 1-1tRNA-Thr(tgt)c[67989,68064]  
 gccgatttagctcagttggtagagcgttcacttgtaatgaagatccgc  
 ggggtcgactcctgcaatcggcacca  
 1-2tRNA-Arg(tct)c[68608,68683]  
 gcccttatagttaatggatagcacacgatcgttctaaggctcggtagtc  
 ggggtcgagtcctgggggggtacca  
 1-3tRNA-Leu(taa)c[68686,68772]  
 gcgtcgatgttggaattggtagacaaaggagactaaaatctcccgggat  
 taaaccgtacgagttcgagtcctggttcgacgcacca  
 1-4tRNA-Met(cat)c[69948,70024]  
 ggccctgtagtcaattggtagagcgttcccctcataagggttggtgc  
 atgttcgagtccttgccagggtcacca  
 1-5tRNA-Pro(tgg)c[71292,71368]

ctccgtatagctcagctctggtagagcgctccattgggatggagaggtcg  
aatgttcgagtcattctatggagacca  
1-6tRNA-Gly(tcc)c[71374,71448]  
gcatccatcgataacggctattataggtgactccactcacttgataag  
ggttcgattcccttggatgctcca  
1-7tRNA-Trp(cca)c[71454,71528]  
aggttcttagtataacggctattatgctgggctccaaaccagtgatgag  
ggttcgattccttcagggcctgcca  
1-8tRNA-Ile(gat)c[71535,71610]  
gggagtatagctcatttggtagagctctcgaccgataatcgagcggtgac  
tggttcgagtcagttactcccacca  
1-9tRNA-Ser(tga)c[71677,71761]  
ggagagtagcgctagtggtagcaaaccggacttgaaatccgggccaccgg  
aaacggtgaggggtcaactcctttactctccgcca  
1-10tRNA-His(gtg)c[71859,71934]  
gtggccgtagttcagttggtagaactcgagattgtgattctcgtagtc  
gggttcaactcccatcggtcacccca  
1-11tRNA-Gln(ttg)c[72031,72105]  
tggactatagacaagcggtaagtcaccggccttgactccggtatctct  
ggttcgaatccagatagtcagcca  
1-12tRNA-Met(cat)c[72111,72187]  
tgcgggtaactcagttggtagaatgtgggctcatatcccacacgcg  
caggttcgagtcctgcctccgcctcca  
1-13tRNA-Asp(gtc)c[72349,72425]  
ggacctatagtttagttggataaaatactcccctgtcacgggagagagcg  
cgagttcgatcctcgctaggtccgcca  
1-14tRNA-Asn(gtt)c[72656,72740]  
gggtcggttggtgagaggtaagcgacggactgtaatccgtgcagaaa  
tgactaggcaggttcgatacctgcacggcccgcga  
1-15tRNA-Lys(ttt)c[72747,72824]  
agaacgttagctcatctggttagagcactcgacttttaacgagatgctg  
atgggtcaaataccctcacgttctacca  
1-16tRNA-Tyr(gta)c[73303,73389]  
ggggcgtagaccgtaggggtagcgggacagactgtaaatctgttctca  
aaaggctcgggtggttcgactccatcactccccacca

>KX130864.1 Shigella phage SHBML-50-1, complete genome

1-1tRNA-Arg(tct)c[70296,70371]  
cggggcatagctcagaaggaagagcaaggaccttaagtcctaggtcgt  
aggttcgatccctactgcctcgacca  
1-2tRNA-His(gtg)c[70376,70451]  
gtggccgtagttcagttggtagaactcgagattgtgattctcgtagtc  
gggttcgactcccatcggtcacccca  
1-3tRNA-Asn(gtt)c[70566,70640]  
ggatgtgtagctcagtggtagagcagttgactgtaataatgggtccat

ggttcgaatccatgcatgtccgcca  
 1-4tRNA-Tyr(gta)c[70645,70731]  
 ggggagttatcccgtagaggtagcgggtggactgtaaatccattgtcat  
 tgcgactcgggtggttcgactccatcactccccacca  
 1-5tRNA-Met(cat)c[70744,70818]  
 ggccctgtagctggaaggtcaagcaagcgactcataatcgccagatggt  
 ggttcaattccaccaggccacca  
 1-6tRNA-Thr(tgt)c[70820,70895]  
 gctgatttagctcagtaggtagagcaactcacttgtaatgagaaggtcgg  
 cggttcgattccgtcaatcagcacca  
 1-7tRNA-Ser(tga)c[70902,70991]  
 ggaggcgtggcagagtggtttaatgcaccggtcttgaaccggcagtcg  
 ctccggcgactcataggttcaaatcctatcgctccgcca  
 1-8tRNA-Pro(tgg)c[70993,71067]  
 ctccgtgtagctcagtttgtagagcgctgattgggatcaggaggtcc  
 aaggttcaaatcctgtatggagac  
 1-9tRNA-Gly(tcc)c[71078,71151]  
 gcggatatcgataatggcattacctcagacttccaatctgatgatgga  
 gttcgattctcattatccgctcca  
 1-10tRNA-Leu(taa)c[71157,71243]  
 gcgagaatggtaaattggtaaaggcacagcacttaaatgctgcggaat  
 gatttccttgtgggttcgagtcctcactctcgcacca  
 1-11tRNA-Gln(ttg)c[71244,71317]  
 tgggaattagccaagttgtaaggcactggatttgattccagatgcaa  
 aggttcgagtcctttattcccagc

>KU577463.1 Bacillus phage Deep Blue, complete genome

1-1tRNA-Met(cat)c[140342,140416]  
 taggattatagctcagtggttagagcgtgggtctcataagcccagggtcga  
 tggttcgaccccatctattcctatc  
 1-2tRNA-Trp(cca)c[140420,140493]  
 ggggggttagtttagtggaaaaatgacaggctccaaacctgtagtcggag  
 gttcgattccttgcgcccttgcca  
 1-3tRNA-Leu(tag)c[140500,140575]  
 gccgaggtaatccaacggaagagatagtggtcttagaagccatacagtgga  
 ggggtcgaatccctctctcggtacca  
 1-4tRNA-Ile(gat)c[140584,140660]  
 actagtgtagctcagttaggtagagcagtgcttgataaggcattggtca  
 caggttcaaatcctgtcactagtagacca  
 1-5tRNA-Leu(taa)c[140662,140748]  
 atcggagtggtggaattggtagacatacgggacttaaatcccgtgccat  
 tgagtgcgtgagggttcgagtcctcctccgatacca  
 1-6tRNA-Tyr(gta)c[140756,140837]  
 gggcgtgctatccttgagagataagctggctgtaaacagtggcgtaag  
 ctgagaaggttcgaatccttccattcccacca

1-7tRNA-Phe(gaa)c[140844,140918]  
ggacaggtagctgagacggattagcgactggttgaaaccattagagagt  
ggatcgttaccactcctgtccacca

1-8tRNA-Pro(tgg)c[141014,141088]  
tgtggatgtaggctagttggtcagtcacctcggttggggcgagggtcacg  
cacgttcgaatcgtgtcatccgcat

1-9tRNA-His(gtg)c[141191,141261]  
cagtggtggcgtagtggaacgcagtggtggaatccatgaacgaga  
gttcgattctctccatactga

1-10tRNA-Gln(ttg)c[141339,141415]  
tttcggagtggaacaaactggtaagtcgtcaggcttgaccctgaagtg  
gggtggttcgatcccatcctccgaagtc

1-11tRNA-Ser(tga)c[141494,141581]  
cggggaataactcaagtggtgaaaagaggatggtctgaaaaccattaggc  
gtgaaagcgtgcgggggttcgaatccctcttctcctcggc

1-12tRNA-Arg(tct)c[141672,141747]  
taccctttagccaagtggactaaggcaacgggcttctatcccgtggatc  
gtgcgttcgaatcgtacagggggtgt

1-13tRNA-Glu(ttc)c[141841,141916]  
tgtcgcattggtgaaactggctaacacactcggttctaccgagcattc  
acgagttcgaatctcgtatgcgatat

1-14tRNA-Thr(tgt)c[142030,142104]  
gccttcttagctcaggtggctagagcgactgccttgtaagcagtaggtcg  
tgggttcgaatcctacagtcggcac

1-15tRNA-Asp(gtc)c[142110,142183]  
tggggatatagtgtagcgggaacacactgactgtctatcaagtagcac  
gggttcaagtcccgttatcctcgt

1-16tRNA-Gly(tcc)c[142272,142346]  
ggggcattggtatattggctattattcttggtccaaccaagcgaggtc  
ggttcgattccgacatgtccctcca

1-17tRNA-Ser(gct)c[142532,142622]  
ggaagggtgtcagagcggttattgttctgttgctaaacaggtgtacg  
tccttaacgtaccacaggtcaaatectgtacctccacca

1-18tRNA-Asn(gtt)c[142627,142701]  
gtactttagctcagaggtagagcagcagattgtaaatctgaaggtcggt  
ggttcgatcccaccctggtacgcca

1-19tRNA-Cys(gca)c[142729,142802]  
gaagggtaccgaagtggctcaacggcacagattgcaaccctgttgtcg  
ggggttcgaatccctccactttct

>KX397368.1 Erwinia phage vB\_EamM\_Huxley, complete genome

1-1tRNA-Trp(cca)[883,959]  
gggggagtagttcaattggcgagagcgtcggttccaaatccggttggtg  
caggttcgagtcctgtctcccctgccca

1-2tRNA-Cys(gca)[1281,1354]



ggggcgctggccgagtggttaggcgctggattgcaaatcctgtaccgcg  
gttcgattccgcggcgtccctcca  
1-3tRNA-Tyr(gta)[4117,4202]  
ggcgggttactcaagcggtaacgagagcagactgtaaactgttgcctt  
cgggcttcgtaggttcaaactctcacgccacca  
1-4tRNA-Asp(gtc)[4504,4579]  
ggtgctatcgtctagtgccgaggatactaccctgtcacggtagagaccg  
gagttcgattctccgtagcaccgcca  
1-5tRNA-Ile(gat)[4588,4663]  
tgctcttagctcagttggtagagcgacccctgataagggtgaggccac  
tggttcaagtcagtagatgcaacca  
1-6tRNA-Glu(ttc)[4671,4747]  
attcccgatctagttggtccaggatacgacactttcactgtcggtaca  
cgagttcaaactcgtcgggaatacca  
1-7tRNA-Ser(gct)[4753,4843]  
agagaattgactgagttggttaaggctcccctgctaaggagtgat  
gcgaaagtgtaccattggttcgaatccaatattctctgcca  
1-8tRNA-Ile(aat)[5308,5401]  
tggctccgtagctaaatcggtagaggcagacttaattagtttccaacg  
atltataatcgctggtgtaggtcaagtctaccggagcaag  
1-9tRNA-Asn(gtt)[5485,5560]  
gactctgtagttcagttggtagaacggtgactgttaatccatatgtcgc  
aggttcgagtcctgccagagtcgcca

>KR269718.1 Escherichia phage HY03, complete genome

1-1tRNA-Arg(tct)c[7,83]  
cggggcatagctcaattgtatagagcaacggacttctaactcgtaggttg  
aaggttagaatccttctgcctcgacca  
1-2tRNA-Met(cat)c[794,865]  
ggcctgtagctggaaggttcaagcaagcgactcataatgccagatggt  
ggttcaattccaccaggcca  
1-3tRNA-Thr(tgt)c[872,944]  
gctgatttagctcagtaggtagagcaactcacttgaatgaggacgtcgg  
cgggttcgattccgtcaatcagca  
1-4tRNA-Ser(tga)c[951,1039]  
tggaggcgtggcagagtggtttaatgcaccggcttgaaaaccggcagtc  
gtccggcgactcataggttcaaactctatcgctccgt  
1-5tRNA-Pro(tgg)c[1040,1114]  
ctccgtgtagctcagtttggtagagcgtctgttgggagcagaatgtcg  
caggttcaaactctgccgagagac  
1-6tRNA-Gly(tcc)c[1127,1198]  
gcggatatcgtataatggattacctcagacttccaatctgatgatga  
gttcgattctcattatccgctc  
1-7tRNA-Leu(taa)c[1205,1291]  
gcgagaatggtcaaattggtaaaggcacagcacttaaatgctcggaat

gatttccttgtgggttcgagtcaccacttctctgtacca  
>KU867307.1 Salmonella phage vB\_SnwM\_CGG4-1, complete genome

1-tRNA-Arg(tct)c[57710,57785]  
cgaggcatagctcagaaggaagagcaaggaccttctaagtcctaggtcgt  
aggttcgatccctactgtctcgacca  
1-2tRNA-Gln(ttg)c[58425,58500]  
tgggaattagccaagttggaaggcaccggatttgcattccgggatgcac  
tggttcgagtcagttattcccagcca  
1-3tRNA-Met(cat)c[58507,58581]  
ggccctttagctcaatgggagagctgtcagctcataactgataggtagct  
ggatcgaaaccagcaagggccacca

>KX130862.1 Shigella phage SHFML-26, complete genome

1-tRNA-Arg(tct)c[133433,133508]  
cggggcatagctcagaaggaagagcaaggaccttctaagtcctgggtcgt  
aggttcgatccctactgcctcgacca  
1-2tRNA-Met(cat)c[134219,134290]  
ggccctgtagctggaaggtcaagcaagcgactcataatgccagatggt  
ggttcaattccaccaggcca  
1-3tRNA-Thr(tgt)c[134297,134369]  
gctgatttagctcagtaggtagagcaactcacttgtaatgagaaggtcgg  
cggttcgattccgtcaatcagca  
1-4tRNA-Ser(tga)c[134376,134464]  
tggaggcgtggcagagtggttaatgcaccggcttgaaaaccggcagtc  
gctccggcgactcataggttcaatcctatcgctccgt  
1-5tRNA-Pro(tgg)c[134465,134539]  
cttcgttagctcagtttgtagagcgtctgctttgggagcagaatgtcg  
caggttcaatcctgcccgagac  
1-6tRNA-Gly(tcc)c[134552,134623]  
gcggatatcgataatggattacctcagactccaatctgatgatgtga  
gttcgattctcattatccgctc  
1-7tRNA-Leu(taa)c[134630,134716]  
gcgagaatggtcaaattggtaaaggcacagcacttaaatgctgcggaat  
gatttccttgtgggttcgagtcaccacttctctgtacca  
1-8tRNA-Gln(ttg)c[134717,134790]  
tgggaattagccaagttggaaggcactggatttgcattccaggatgcaa  
aggttcgagtcctttattcccagc

>KX752698.1 Mycobacterium phage Tonenili, complete genome

1-tRNA-Ser(gct)[35875,35958]  
ggagggtgagcatcaggtgatgcagcgagattgctaattcccgtacggtaa  
ccaccccgtaggttcgaatcctcctccctccgc  
1-2tRNA-Leu(cag)[36151,36226]  
gctcccgtagcccaattggcaggaggcaccagattcaggatctgggcagt  
tgagttcgaatctcaccgggagtac  
1-3tRNA-Leu(gag)[36346,36420]

gtctctgtaggcaaaccggaaaagccgccatcttgaggggtggtgcgtg  
cgggttcgactccccccagagacac  
1-4tRNA-Leu(caa)[36421,36494]  
gccgtggtaggccatctggcgagccgccgaattcaagtttcggtgttgc  
gggttcgaatcccccccacggtac  
1-5tRNA-Pro(tgg)[95715,95789]  
cggggtgtagttcagtttgaagagcgcttggttgggaccaagatgtc  
caggttcgaatcctgtcaccccgac  
1-6tRNA-Trp(cca)[95806,95881]  
tggggtgaagccgatccggaaggcagcggtctcaaagccgtctcatagc  
gggttcgaatcccgtaaccctgccca  
1-7tRNA-Tyr(gta)[95883,95968]  
gccgcacatgcccactggtgttgggagcagactgtaaatctgtggccct  
agggacggtgaggttcgattcctcagtcggtacca  
1-8tRNA-Pyl(cta)[97314,97385]  
gcaccatttgctcaatggcagagcggcggttctaaccctgagtgccg  
gttcgattccggcatggtgcac  
1-9tRNA-Met(cat)[97536,97610]  
agcgggtgtagagcagctaggtagctcgccgggctcataaccggaggacg  
cgtgttcgaatcacgccaccgccac  
1-10tRNA-Cys(gca)[97824,97895]  
gcgccttggcggaatggctacgtgctcggtgcaaccgagttatcccg  
gttcgactccgggaggcgctc  
1-11tRNA-Glu(ctc)[97900,97974]  
ggtccgttggagtagatggatatctgccaccctctcaagtgagatca  
cgggttcaagtcccgtacggactgc  
1-12tRNA-His(gtg)[97976,98048]  
gtggccgtagttcagcggtagaacaccgggtgtgatcccgacgccgtc  
ggttcgaatccgaccgtcaccc  
1-13tRNA-Ala(tgc)[98208,98281]  
gggcctatagctcatctggtagagcgctgccttgcaagcaggaggcggc  
aggttcaagtccctgttagtccac  
1-14tRNA-Phe(gaa)[98471,98543]  
gccgtcatagctcagttggtagagcactggcctgaaaaccagtgccga  
ggttcgattcctcgtgtcggcac  
1-15tRNA-Val(cac)[98626,98699]  
gtccgtttagctcagctggaagagcgctcggccacacccgagaggccgc  
aggttcgatccctgcaatggacac  
1-16tRNA-Lys(ctt)[98821,98893]  
gccttcgtagctcagtggtagagctgccctcttaagcggtaggtcgtt  
ggttcgaatccagccgggggcac  
1-17tRNA-Glu(ttc)[98897,98972]  
ggtcgggtggtctgttggcaggccggtcgggttttcacccggcgctcatc  
gcgggttcgattcccgtaaccgactgc

1-18tRNA-Gly(tcc)[99102,99174]  
gcgggtgtggccgaatggctcaggcaccagactccactctggctaagca  
ggttcgattcctgtcatccgctc  
1-19tRNA-Thr(cgt)[99234,99307]  
gctgctgtagctcacctggcagagcgtcggcgtcgtatcccgaaggcatc  
cggttcgagtcggacagcagctc  
1-20tRNA-Thr(tgt)[99316,99389]  
gcccttgtagctcagtggttagagcaccgacctgtaagtcgggtgtccc  
gggttcgattcctggttggggccc  
1-21tRNA-Thr(ggt)[99449,99521]  
gctgatttagctcagtggttagagcggcacttggtatgtcggaggccccg  
ggttcgatccccggattcagctc  
1-22tRNA-Gly(gcc)[100844,100917]  
gcgaaggtagctcagctggttagagcgccaccttgccaaggtggaggtcgc  
gggatcgtaacccgttcttcgctc  
1-23tRNA-Asp(gtc)[100921,100996]  
ggccctgtggagcagctaggagtgtcgcaccctgtcacggtggaggtc  
gacggttcaaatccgttcagggtcgc  
1-24tRNA-Met(cat)[101083,101155]  
gcctcactagctcattggttagagccgctcgtcataacgtgcaggtacct  
ggttcgattccagggtgaggtac  
1-25tRNA-Ile(gat)[101160,101236]  
gcctgttagcggactggctcgtccgatccaagctgataactggcgttaagc  
ggtgttcgattaccgagcaggtacca  
1-26tRNA-Arg(acg)[101298,101370]  
gcctctatggtccaacggagatgacgccggtctacggaaccggagatcgc  
tgttcgactcgcgctaggggcac  
1-27tRNA-Val(gac)[101413,101485]  
gtccgtgtagctcaggggtagagcgctgctcgacacgcaggaggaccga  
ggttcgaaacctcgcatggacac  
1-28tRNA-Arg(cct)[101657,101730]  
gcctctgtagctcaacggacagagcaacgcggtcctaacgcggtggctgg  
aggttcgaatcctctcggaggcac  
1-30tRNA-Gln(ttg)[102271,102346]  
tggggtatggtggcaatctggcagtcgccgacgttgactccggaggt  
gcaggttcgagtcctgctaccccatc  
1-31tRNA-Arg(tct)[102350,102425]  
gccctttagctcagtggttagagcggcgagcttctacctcgcgggccgg  
gagttcgaatctctcaggggcacca  
1-32tRNA-Gln(ctg)[131096,131170]  
tgctcgttggtgtaactggcaacactacggactctgactccgtcattctt  
ggttcgaatccaggacgagcaacca  
1-33tRNA-Asn(gtt)[131177,131253]  
tggggtgtagttcaatctggcagaacgctcactgttaatcagtagttg

aaggttcgagtccttccatcccagcca

>KX130865.1 Shigella phage SHSML-52-1, complete genome

1-1tRNA-Met(cat)[130607,130681]

ggccctgtagctcaatgggagagctgtcagctcataactgataggtagct

ggatcgaaccagccagggtcacca

1-2tRNA-Arg(tct)[130685,130761]

cgaggcatagctcaattgtatagagcaacggacttctaaccgtaggttg

aaggttagaatccttctgtctcgacca

>KU594606.1 Cyanophage S-RIM32 isolate RW\_108\_0702, complete genome

1-1tRNA-Leu(taa)[17872,17956]

tgggaccatgatggaattggtagacattcgggacttaaaatccgttggca

ttacgccgtgcgagttcaagtcctcgctggcctat

1-2tRNA-Asp(gtc)[19287,19362]

ggggtagtagctcagttggttagagtacctgcctgtcacgcagggtgccg

tgggttcaagtcccatctatcccgcc

1-3tRNA-Thr(tgt)[19365,19438]

gcctccgtagctcagctggatagagcaacggtttgtaaaccgtaggtcg

tcggttcaagtcgaccgtgggct

1-4tRNA-Leu(caa)[19491,19563]

catctggtagtctattggttaaggacgggtggacaacacacatgaaactg

ggttcgattcctagacagatgac

1-5tRNA-Ala(tgc)[19649,19721]

ggggaattagctcagttggttagagcacctgcttgcgaagcaggctgtcag

gagttcgagtctcctattctcca

1-6tRNA-Asn(gtt)[19749,19822]

tcctctatagctcagtcggtagagcgagtgactgttaatcactatgtccc

tggttcgagcccaggtggaggagc

1-7tRNA-Leu(tag)[19826,19907]

gtcgttggcggaattggttagacgcgctgggttaggttccagtgaagt

aattcgtggaggttcaagtcctctcagcgaca

1-8tRNA-Ser(tga)[146887,146975]

tggaggggcaatccgattggtgacggaacctgtcttgaaaacagttgagg

tgtaaagcccttgggagttcgactctccctccctcgt

1-9tRNA-Arg(tct)[165780,165855]

gggtcagtagctcagttggatagagcaactgccttctaagcagtcggtca

caggttcgagtctgtctgacccgcc

1-10tRNA-Val(tac)[165857,165930]

tgcccgttaactcagcggtagagtgtctctttacacggagggtgtcgg

cggttcgaatccgtcagcgggcat

1-11tRNA-Pro(tgg)[167482,167557]

tcggggcgtagctcagtttggtagagcactcgcttgggagcgagtggcc

gtaggtcaaatacctatcgcccgat

1-12tRNA-Gly(tcc)[169948,170019]

gcgggtgtagttcagtggtagaacgctatcctccaagttagatgtcgtc

gggtcgaatccgatctcccgt  
 >KU594605.1 Cyanophage S-RIM50 isolate RW\_29\_0704, complete genome  
 1-tRNA-Gly(tcc)[13531,13605]  
 gcggatgtagttcagtcaggtagaacgctatcctccaagtagatgctg  
 tcggttcgattccgatcatccgctc  
 1-2tRNA-Val(tac)[13607,13680]  
 tgggcgattaactcagcggtagagtcctcctttacacggagtaggtcgg  
 gggttcgaatccctcatcgcccat  
 1-3tRNA-Leu(taa)[17898,17985]  
 tgggacgggtggcggaatcggtagacgcacgactaaaatccgctgagg  
 attaacctctgtgagagttcaagtctctctcgtcctat  
 1-4tRNA-Thr(tgt)[18058,18131]  
 gcccatatagctcagctggatagagcaacggtttgtaaaccgtaggtcg  
 tcggttcaagtcgacttgggt  
 1-5tRNA-Ala(tgc)[18249,18321]  
 ggggtagtagctcagttggtagacacgtcttgcaagcaggctgtcag  
 gatttcgagtcctattctcca  
 1-6tRNA-Asn(gtt)[18348,18422]  
 ttctctatagctcagtcggtagagcgtctgactgtaatacagaatgtcc  
 ctggttcgagcccagggtggaggagt  
 1-7tRNA-Arg(tct)[159822,159897]  
 tgggtcagtagctcagttggatagagcaactgccttctaagcagtcggtc  
 acaggttcgagtcctgtctgacccgt  
 1-8tRNA-Pro(tgg)[160906,160978]  
 cggggtgtagcgcagaggtagcgcggctgtttgggaacagcaggctcgca  
 gggtcgaatccctgtcaccgac  
 >KJ628499.1 Acinetobacter phage vB\_AbaM\_phiAbaA1, complete genome  
 1-tRNA-Arg(tct)[7851,7927]  
 acgccattagctcagatggatagagcatctgccttctaagtagatggtca  
 cgggttcgaatcctgtatggcgtacca  
 1-2tRNA-Tyr(gta)[8226,8311]  
 gtatgtgtgacccgaattggtaaggagcggactgtaactcgttgtcaa  
 aagcaatttaggttcaagtcctaccacatacacca  
 1-3tRNA-Ile(gat)[8318,8392]  
 ggtagattagctcagcggtagagcagtagcccgataagctattggtcgct  
 ggttcaaatccagcatcgactacca  
 1-4tRNA-Pro(tgg)[8980,9056]  
 cggtgtgttcgagaaaggtaatcgactgccttggagcgcagaatatg  
 taggttcgagtcctaccgcaccgacca  
 1-5tRNA-Asp(gtc)[9262,9337]  
 gactcattagctcaatcgggagagcggcactgtcactgtggaggtaag  
 gagatcgaaactcctatgggtcgcca  
 1-6tRNA-Thr(tgt)[9608,9681]  
 gctggatcgtatagtggtattatgctggtcttgaatccagtcacggtg

gttcgattcctcctaccagcacca  
1-7tRNA-Trp(cca)[10009,10079]  
gggttgaccgctggcggtgacgaggctccaaacctgtcttgctacgtt  
cgattcgtagtcgatctgcc  
1-8tRNA-Gln(ttg)[10201,10276]  
tgggacgtagtgtagttggtagcacatgagactttgactctcatagatt  
cagttcgaacctgaacgtccctcca  
1-9tRNA-His(gtg)[10373,10448]  
gtgatcatgggtgaattggctagcaccgcgatttgtgatgtcgttagtct  
gagttcgaacctcagtgatcacacca  
1-10tRNA-Gly(tcc)[10451,10524]  
gcgtgattgggtataatggtattatgtctggctccaccagaagacgaga  
gttcgattctctcatccagcgcca  
1-11tRNA-Glu(ttc)[10531,10605]  
gttcattcgactagcggtaggtcgcttcccttcaaggaagtagcacg  
agttcaaatctcgtatggaatacca  
1-12tRNA-Cys(gca)[10933,11007]  
ataccataatctaaaggacgaagtgtggcttgcaaacccagaatagt  
agttcgaagtctcacatggtattcca  
1-13tRNA-Leu(tag)[11022,11099]  
gtacaggtgacgggaactggcatacctatcacgcttagaacgtggctt  
gtgggttcgaagcccacctgtatacca

>KX405003.1 Salmonella phage BPS15Q2, complete genome

1-1tRNA-Pro(tgg)[10996,11072]  
ctctgttttagctcagcttggtagagcgttccgtttggggcggttaagccg  
gaggttcaagtcctccaacagagacca  
1-2tRNA-Glu(ttc)[11080,11157]  
gttcagtagacaaaatggtatagtcaccactcttcaaagtggaatatt  
gagggttcaaatccctctggaacgcca  
1-3tRNA-Met(cat)[11248,11324]  
tgcgggtatagagaaaggcgtctcacatgtctcattagcatggtatcgg  
caggttcgactcctgcacccgcctcca  
1-4tRNA-Asn(gtt)[11403,11479]  
ggttaggaagcacataaggtatgtcggtcgcctgttaagcgaatggcac  
agggttcgaatccctgactaaccgcca  
1-5tRNA-Tyr(gta)[11551,11638]  
gtgtcgttatcccgtagatggtagcgggtgggactgtaaatccctgtca  
ttgagactcggtaggttcgactcctacacggcacacca  
1-6tRNA-Asp(gtc)[11645,11721]  
ggttatgtagttaactggataaaatactcccctgtcacgggagatgatg  
tgagttcaagtctcatcataaccgcca  
1-7tRNA-Lys(ttt)[12154,12229]  
ggaagtgtagcagaatggtgatgcggcagacttttaatctgacaggcgat  
gggttcgaatccctccacttctacca

1-8tRNA-Met(cat)[12234,12310]  
ggttcagtcgcagataaggtaatgcagggtctcataagccctatgaatg  
tgggttcgattcccatctgaacctcca  
1-9tRNA-Ile(gat)[12313,12387]  
tgtgggtagcataaatggtaatgcaaacggctgataaccgtagaagag  
ggttcgataccctcacctacaacca  
1-10tRNA-Ser(tga)[13046,13135]  
ggtaggtagcggctaattggtagccaaactgtctgaaaacagttgccact  
gtagagatacggtaggggtcgcactccttacttaccgcc  
1-11tRNA-Leu(tag)[13391,13467]  
gcacctatagcccaactggtagaggcagcagacttagaatctgctcagtg  
tgattcgaatctctctaggtgtacca  
1-12tRNA-Lys(ctt)[13475,13550]  
gcagggtagcaaaatggttatgcggctgactcttaacagtaagacgat  
gggttcaattccctccacctgtacca  
1-13tRNA-Ala(tgc)[13557,13632]  
ggggatgtagtttacatggttaaacataagtttgcaaacttaagtaca  
gggttcaattccctgcttctccacca  
1-14tRNA-Gly(tcc)[13639,13713]  
gcatccatagtttaaacgggaaaattacagtcttccaaactgaggttgag  
ggttcgattccctctggatgctcca  
1-15tRNA-Thr(tgt)[14142,14218]  
tgctgcttcgtataattggctattacacatcccttgtaaggatggaaat  
gcaggttcgaatccttgtgggagcacc  
1-16tRNA-Val(tac)[14315,14389]  
actcgcttagtttatatggtaaaacatcaccttacaagatgaagaagaa  
ggttcaagtccttagtgagtacca  
1-17tRNA-Leu(caa)[14391,14468]  
gttcagtatcccaattggcagaggatgcaagctcaaaccctgtactagt  
gacggttcgaatccgtcttggaaacca  
1-18tRNA-Arg(acg)[14474,14549]  
gcaggattagttcaaatggatagagcaacagtctacgaagctgtaatatag  
gggttcgaatcccttatcctgcgcca  
1-19tRNA-Gln(ttg)[15135,15210]  
aggggattagtttacaagggttaaacctcggctttgaaatcgaagaagt  
tggttcaattccaacatcccccgcca  
1-20tRNA-Leu(taa)[15213,15291]  
gctccattactccaattggcagagaggccagacttaaaatctgtgttatg  
tatcggttcgaatccgatatggagtacca  
1-21tRNA-Gln(ctg)[15297,15372]  
agcggtagcataactggcaatgcagcagctctgaagctgtcctatta  
aggttcaaatccttatgccgctgcca  
1-22tRNA-His(gtg)[15404,15479]  
gtggccttatcataaatggtaatgacctatgctgtgaacatggtctacac



gggttcaaatcccgtaggtcacccca  
1-23tRNA-Phe(gaa)[15486,15561]  
agtccaagtagcttatatggttaaagcgcgtgtctgaaaaacatgagaag  
agggttcaaatcccactggactacca  
1-24tRNA-Ser(gct)[16314,16406]  
ggaagattaaccctaaaaggttaaggagcagtttgctaaactgccagtag  
ctgataaatcggtgtaccagttcaagctcgtgtatcttctcca  
1-25tRNA-Cys(gca)[16411,16486]  
gaatccgtgacagaaatggatatgtgcctgtctgcaaacaggttataa  
gggttcgagtccttcggattctcca

>KU686211.1 Synechococcus phage S-WAM2 isolate 0810PA29, complete genome

1-1tRNA-Leu(taa)[16149,16232]  
gggacggtgggtgaattggtagacccccagacttaaaatctgttgagcg  
tatgctcgtgcgggttcaagtcgcgcctcgtccta  
1-2tRNA-Asp(gtc)[17704,17779]  
tggggtgtagctcagtcggttagagcgcctgcctgtcacgcaggaagtc  
gagggttcaagtccttcagtcctcgt  
1-3tRNA-Thr(tgt)[17782,17858]  
gccacttagctcagctggatagagcagggtttttaaagctcaggta  
cccgttcaagtcggtaagtggctcca  
1-4tRNA-Ala(tgc)[17859,17931]  
ggggaattagctcagttggttagagcgcctgcttgcaagcaggatgtcag  
cggttcgagtcgcgtattctcca  
1-5tRNA-Asn(gtt)[18292,18366]  
ttggggtgtagctcagcggtagtagcgggaagctgtaacttctaggtcg  
caggttcgatccctgccgcccagtc  
1-6tRNA-Tyr(gta)[18369,18450]  
gggtaggtgtccgagtggttaattggaggcggactgtaaatccgctggctc  
tgctacgggggttcaaatccctccctgccca  
1-7tRNA-Arg(tct)[157420,157496]  
gtctcagtagctcagctggatagagcaactgccttctaagcagtcggtcg  
ctggttcgaatccagcctgagacgcca  
1-8tRNA-Leu(tag)[157497,157579]  
gtcggatggcggaattggtagacgcctgggttaggttccagtcct  
tgcgacgtggaggttcaagtcctcttaccgaca  
1-9tRNA-Val(tac)[157581,157654]  
tgcccgaatagcgcagcggtagcgcacctctttacacggagatggtcgg  
gggttcgaatccctcttcgggcat  
1-10tRNA-Ser(tga)[158117,158203]  
tgaaaagggtggtcgagtggttgatggctctggtctgaaaaccagcgaag  
tgagagcttccgtgggttcgaatcccacccttccgt  
1-11tRNA-Pro(tgg)[158206,158280]  
cggggtgtagctcagttggttagagcgcctcttgggaggcggatgccg  
taggttcgaatcctatcaccccgac

1-12tRNA-Gly(tcc)[160808,160879]  
gcggagttagttcagtggttagaacgctatcctccaagttagatgtcgtc  
ggttcgaatccgatactccgct

>KU878968.1 Escherichia phage WG01, complete genome  
1-1tRNA-Arg(tct)c[68899,68973]  
gtcccgtggtgtaatggatagcatcacgaccttctaagtttgcggtcct  
ggttcgatcccaggcgaggatacca  
1-2tRNA-Met(cat)c[68979,69055]  
ggcccttagctcaatggtagcagcagtcacctcataagggaaaggta  
ccagttcaaatctggtctgggtcacca

>KX236333.1 Campylobacter phage PC14, complete genome  
1-1tRNA-Tyr(gta)c[120868,120952]  
gtagaagtaggataattggaatccaccagactgtaaattggtcgtctt  
tggcattgatggttcaagtcacatccttctacacca  
1-2tRNA-Asn(gtt)c[120971,121045]  
tgcagattagcacagcggtagtgcaatcgactgtaatcgatgagtcaga  
ggttcgaatcctctatctgcagcca  
1-3tRNA-Met(cat)c[121139,121213]  
ggcgagtagctcaatggtagagcaaccggctcataaccggttggtata  
ggttcgattcctgtttcgcccacca

>KU878969.1 Escherichia phage MX01, complete genome  
1-1tRNA-Arg(tct)c[69836,69910]  
gtcccgtggtgtaatggatagcatcacgaccttctaagtttgcggtcct  
ggttcgatcccaggcgaggatacca  
1-2tRNA-Met(cat)c[69916,69992]  
ggccccgtagctcaatggtagcagcagtcacctcataagggaaaggta  
ccagttcaaatctggtccgggtcacca

>KU686210.1 Synechococcus phage S-WAM1 isolate 0810PA09, complete genome  
1-1tRNA-Thr(tgt)[18964,19038]  
gcctgattagctcagctggatagagcaacggtttgtaaacgtaggtcgtc  
tcggttcaagtccgacatcaggctc  
1-2tRNA-Asn(gtt)[19044,19117]  
ttcctccttagttcagcggtagaacgaacgactgtaatcgtaagtcct  
tggttcgatcccaggagggggagt  
1-3tRNA-Arg(tct)[165410,165485]  
tggtcagtagctcagtggaagagcaactgccttctaagcagtcggtc  
taggttcgagtcctacctggatcgt  
1-4tRNA-Val(tac)[165488,165560]  
gggagattagctcagcggtagagcacctgtttacaccgagattgtcggg  
ggttcgatcccctcatctccac

>KX245012.1 Salmonella phage GG32, complete genome  
1-1tRNA-Met(cat)[19041,19116]  
ggccccgtagctcagtggttagagcagtcgactcataatcgattggtcgc  
tggttcaagtccagccagggtcacca

1-2tRNA-Asn(gtt)[19529,19604]  
 gacgatgtagttcagtcggtagaacggcggctgttaaatcgtatgtcgc  
 aggttcaagtcctgccatcgtcgcca  
 1-3tRNA-Ser(act)[20272,20360]  
 ggaaggttccccgagaggtttaagggactcgactactaatcgagtggggc  
 ttttagccccgaaggttcgaatccttcacctccacca  
 >KT001918.1 Klebsiella phage Matisse, complete genome  
 1-1tRNA-Met(cat)[49953,50029]  
 ggccccttagctcaataggtagagctaatacactcataatggtaggttcc  
 cggttcaagtcacgggagggccacca  
 >KM607000.1 Enterobacteria phage RB27, complete genome  
 1-1tRNA-Arg(tct)c[67633,67708]  
 cgaggcatagctcagaaggaagagcaaggaccttaagtctgggtcgt  
 aggttcgatccctactgcctcgacca  
 1-2tRNA-Asn(gtt)c[67713,67787]  
 ggatgttagctcaatggcagagcgtcgctgttaagcgattggttata  
 ggttcgaatcctatcacgtccgcca  
 1-3tRNA-Tyr(gta)c[67792,67878]  
 ggggagttatcccgtagaggtagcgggtggactgtaaatccattgtcat  
 tgcgactcgggtggttcgactccatcactccccacca  
 1-4tRNA-Met(cat)c[67888,67962]  
 ggccctgtagctggaaggttcaagcaagcgactcataatgccagatggt  
 ggttcaattccaccaggccacca  
 1-5tRNA-Thr(tgt)c[67964,68039]  
 gctgatttagctcagtaggtagagcaactcacttgtaatgagaaggtcgg  
 cggttcgattccgtcaatcagcacca  
 1-6tRNA-Ser(tga)c[68045,68134]  
 ggaggcgtggcagagtgggttaatgcaccggcttgaaaaccggcagtcg  
 ctccggcgactcataggttcaaactctatgcctccgcca  
 1-7tRNA-Pro(tgg)c[68136,68210]  
 ctccgttagctcagtttggtagagcgcctgattgggatcaggaggtcc  
 aaggttcaaatccttgatggagac  
 1-8tRNA-Gly(tcc)c[68221,68294]  
 gcggatatgtataatggcattacctcagactccaatctgatgatgtga  
 gttcgattctcattatccgtcca  
 1-9tRNA-Leu(taa)c[68300,68386]  
 gcgagaatggtaaattggtaaaggcacagcacttaaaatgctgcggaat  
 gatttccttggtggttcgagtccttctcgacca  
 1-10tRNA-Gln(ttg)c[68387,68460]  
 tgggaattagccaagttggttaaggcatagcactttgactgctagatgcaa  
 aggttcgagtccttattcccagc  
 >KT001915.1 Citrobacter phage Merlin, complete genome  
 1-1tRNA-Met(cat)c[72013,72089]  
 ggccccttagctcagttggttagagcagtcgactcataatcgattggtcg

ctggttcgagtcagcaggggccacca  
 1-2tRNA-Arg(tct)c[72094,72169]  
 gttctttagctcagtgatagagcaacggctcttaaacctgggtcgt  
 tggttcaaatccaaccaggaacacca  
 1-3tRNA-Pro(tgg)c[72175,72251]  
 cagtacgtagcgagctcgttagcgttaggagcttggatgcttcgggtcgt  
 taggttcgaatcctaccgtactgacca  
 1-4tRNA-Gly(tcc)c[72259,72333]  
 gcatccatcgtatagcggctattatgactggctccacccagtagatgag  
 agttcgattctctctggatgctcca  
 1-5tRNA-Ser(tga)c[72704,72796]  
 ggaagcgtggtagagttggtttattacaccggctctgaaaaccggaggcc  
 gtagtgatacgggtccgtgggttcgaatcccacggcttcctcca  
 1-6tRNA-His(gtg)c[72801,72876]  
 gtggccgtagttcagttggtagaactcgagattgtgattctcgtatcat  
 ggggtcaactcccatcggtcacccca  
 1-7tRNA-Gln(ttg)c[72982,73057]  
 tggggtatagccaagttggtacggcagtagattttgattctacgattccc  
 tggttcgagtcaggtaacccagcca  
 1-8tRNA-Met(cat)c[73065,73141]  
 tgcgggttaacttcagttggtagaatgacgggtcatatcccgttacgcg  
 atggttcgagtcacatcaccgcctcca  
 1-9tRNA-Asp(gtc)c[73299,73374]  
 ggacctatagtttcagcgggtaaaatactgcctgtcacgtgagagtcac  
 ggggtcgaatcccgttaggtccgcca  
 1-10tRNA-Asn(gtt)c[73891,73975]  
 ggtcagttggctgagagggaagcggcgactgtaatccgcgtcggtaa  
 cgacaaggcaggttcgatacctgcactgaccgcca  
 1-11tRNA-Lys(ttt)c[73981,74057]  
 ggggtgctagctcagttggttagagcaccggacttttaacgggtgtcc  
 gaagttcgaatcttcggcaaccacca

>KT381880.1 Citrobacter phage Margaery, complete genome

1-1tRNA-Gly(tcc)[49264,49339]  
 gcaggtgtagttcaattggtagaatatctggttccatccagattgtga  
 ggggtcgagtccttcacctgctcca

>KM236245.1 Bacillus phage Mater, complete genome

1-1tRNA-Thr(tgt)c[132627,132702]  
 gctctttagctcagttggcagagcagctgattgtaatcagcaggtcgt  
 aggttcgagacctaccgagacacca  
 1-2tRNA-Asp(gtc)c[133079,133151]  
 tggccattagtgtagcggtaacacgactgactgtctatcagttatcctc  
 ggttcaaatccgggatgggtcgt  
 1-3tRNA-Gly(tcc)c[133873,133946]  
 ctcccatgggtcagcggttatgactcttgccctccaagcaagcagcct

cggttcgattccgagatgggggtc  
1-4tRNA-Glu(ttc)c[133948,134023]  
agcgtgtggtgaagcggcattaacacactcgactttctatcgagcattc  
gcgggttcgagtcctcgcagcgctac  
1-5tRNA-Met(cat)c[134034,134105]  
tgctgaggggtcggtagccagtgaggctcctaagccttacttagtaagt  
tcaactcttacctcagcaacca  
1-6tRNA-Asn(gtt)c[134107,134182]  
tgactagtagctcagttggtagagcaatcggctgtaaccgatcggtcgc  
aggttcgagtcctgcctagtcagcca

>KM607004.1 Enterobacteria phage RB68, complete genome

1-1tRNA-Arg(tct)c[71249,71325]  
cgaggcatagctcaattgtatagagaacggacttctaaccgtaggttg  
aaggttagaatccttctgtctcgacca  
1-2tRNA-Asn(gtt)c[71330,71404]  
ggatgtgtagctcagtggttagagcagttgactgtaataatcattggtccat  
ggttcgaatccatgcatgtcccca  
1-3tRNA-Tyr(gta)c[71409,71495]  
ggggagtatcccgtagaggtagcgggtggactgtaaattcattgtcat  
tgcgactcgggtggttcgactccatcactccccacca  
1-4tRNA-Met(cat)c[71508,71582]  
ggccctgtagctggaaggtcaagcaagcgaactcataatgccagatggt  
ggttcaattccaccagggccacca  
1-5tRNA-Thr(tgt)c[71584,71659]  
gctgatttagctcagtaggttagagaactcactgtaatgagaaggtcgg  
cggttcgattccgtcaatcagcacca  
1-6tRNA-Ser(tga)c[71665,71754]  
ggaggtgtggcagagtggtgaatgcaccggtcttgaaaaccggcagtcg  
ctccggcgattcataggttcgaatcctatcacctccgcca  
1-7tRNA-Gly(tcc)c[72416,72489]  
gcggatatcgataatggtattacctcagactccaatctgatgatgtga  
gttcgattctcattatccgtcca  
1-8tRNA-Leu(taa)c[72495,72581]  
gcgagaatggtcaaattggtaaaggcacagcacttaaatgctgcggaat  
gatttccttgtgggttcgagtccttctcgacca  
1-9tRNA-Gln(ttg)c[72582,72655]  
tgggaattagccaagttggttaaggcactggattttgattccaggatgcaa  
aggttcgagtcctttattcccagc

>KT001916.1 Citrobacter phage Michonne, complete genome

1-1tRNA-Cys(gca)c[58564,58639]  
gtatcgggtgacagaaatggatatgtccctgtctgcaaacaggtttatga  
gggttcaagtccttccgatactcca  
1-2tRNA-Ser(gct)c[58646,58738]  
ggaagattaaccctaaaaggtaaggagcagtttgctaaactgccagtaa

ccgagaaatcggcgtaccagttcaagtctggtatcttcctcca  
1-3tRNA-Phe(gaa)c[59491,59566]  
agctcaattagcttatatggttaaagcgcgtgtctgaaaaacatgagaac  
agggttcaaatcccgatgggctacca  
1-4tRNA-His(gtg)c[59574,59650]  
gtggccttatcataaatggataatgacccatgctgtgaacatgggtctata  
cgggttcgattcccgtaggtcacccca  
1-5tRNA-Gln(ctg)c[59682,59757]  
agcagtatagcataactggcaatgctccagcctctgaagctgaaagatta  
aggttcaaatccttatactgtgcca  
1-6tRNA-Leu(taa)c[59764,59842]  
gtccattactccaattggcagagagccagactaaaatctgtgttatg  
tatcggttcgaatccgatatggagtacca  
1-7tRNA-Gln(ttg)c[59845,59920]  
aggggattagtttacaaggttaaaacctcggtcttgaaatcgaagaaga  
tggttcaattccatcatccccgccca  
1-8tRNA-Arg(acg)c[59930,60006]  
gcagaattagttcaaatggacagagcagcaacctacgaagtgttagtta  
ggggttcgaatcctctattctgcacca  
1-9tRNA-Leu(caa)c[60185,60262]  
gttcagtatcccaattggcagaggatgcaagctcaaaccttgattagt  
gacggttcgaatccgtcttggaacacca  
1-10tRNA-Val(tac)c[60264,60338]  
gtcgccttagtttatatggtaaagcccatccttacaagttggtgaagaa  
ggttcaagtccttcagcgagtacca  
1-11tRNA-Thr(tgt)c[60434,60510]  
gtgctttcgtataattggctattgcacatcccttgaaggatggagatg  
cagggttcgagtcctgtgagcagcacca  
1-12tRNA-Gly(tcc)c[60517,60591]  
gcatccatagttttaaattgggaaaactacagtcctccaaactgaagttgag  
ggttcgattccctctggatgctcca  
1-13tRNA-Ala(tgc)c[60598,60673]  
ggggtcatagtttatatgggtaaaatccgagtttgc aaactgggaact  
gagttcaattctcagtgactccacca  
1-14tRNA-Lys(ctt)c[60680,60755]  
gcaggtgtagcaaaatggttatgcggctgactcttaatcagtaagacgat  
gggttcaattccctccacctgtacca  
1-15tRNA-Leu(tag)c[60763,60839]  
gcacctatagcccaattggaagaggcagcagacttagaatctgctcagtg  
tgagttcgaatctctctaggtgtacca  
1-16tRNA-Ser(tga)c[61560,61649]  
ggtaggtagcggctaattggaagccaaactgtcttgaaaacagttgccatt  
gtagagatacggtaggggttcgactccttatctaccgcc  
1-17tRNA-Arg(tct)c[62040,62115]

gctccgtagtctaaggataggcaactgtcttctaacagttcatatat  
aggttcgagtcctatacggagtgcc  
1-18tRNA-Ile(gat)c[62364,62439]  
gctggtatagttaagaaggttataacactcccctgataagggaatatcgg  
tggttcgattccacctaccagtacca  
1-19tRNA-Met(cat)c[62442,62518]  
ggttcagtcgcagataaggtaatgcaagggttcataagccctatgaatg  
tgggttcgattcccacctgaacctcca  
1-20tRNA-Lys(ttt)c[62600,62675]  
ggaagtgtacgagaatggtgatgcggcagacttttaatctgacaggcgac  
gggttcgaatccctccacttctacca  
1-21tRNA-Asp(gtc)c[63099,63175]  
ggttatgtagtttaactggataaaatacctccctgtcacggaggaagatg  
agggttcgattcccttcgtaaccgcca  
1-22tRNA-Asn(gtt)c[63339,63415]  
ggttaggaagcacataaggcatgtcggctcggctgtaaccgaatggtac  
agggttcgaatccctgactaaccgcca  
1-23tRNA-Met(cat)c[63500,63576]  
tcgggtatagagaaaggcgtctcacatgtctcattagcatggtatcgg  
taggttcgactcctacacccgcctcca  
1-24tRNA-Glu(ttc)c[63664,63741]  
attcccgtagacaaattaggtaaagtcaacacccttcaaggtgtggtt  
gagggttcaagtccttcgggaatgcc  
1-25tRNA-Pro(tgg)c[63748,63824]  
ctccatttagctcagcttggtagcgttcggttggggcggtaaggccg  
aaggttcaagtccttcaatggagacca

>KM236239.1 Citrobacter phage Moogle, complete genome

1-1tRNA-Cys(gca)c[60325,60400]  
gtatcggtgacagaaatggatatgtcctgtctgcaaaacaggtttatga  
gggttcaagtccttcgatactcca  
1-2tRNA-Ser(gct)c[60408,60500]  
ggaagattaaccataaaaggtaaggagcagtttgctaaactgccagtaa  
ccgagaaatcggcgtaccagttcaagtctggtatcttctcca  
1-3tRNA-Phe(gaa)c[61252,61327]  
agctcaattagcttatatggttaaagcgcgtgtctgaaaaacatgagaac  
agggttcaaatcccgatgggctacca  
1-4tRNA-His(gtg)c[61335,61411]  
gtggccttatcataatggataatgacctatgctgtaacatggtctata  
cgggttcgattcccgtaggtcacccca  
1-5tRNA-Gln(ctg)c[61443,61518]  
agcagtgtacataactggcaatgcaccagcctctgaagctgaatgatta  
aggttcaaactcttacgtgctgcc  
1-6tRNA-Leu(taa)c[61525,61603]  
gtccattactccaattggcagagagaccagacttaaatctgcgttatg

tatcgggtcgaatccgatatggagtacca  
1-7tRNA-Gln(ttg)c[61606,61681]  
aggggattagtttacacggttaaacctcggctttgaaatcgaagaaga  
tgggtcaattccatcatccccgccca  
1-8tRNA-Arg(acg)c[61689,61765]  
gcagaattagttcaaatggacagagcagcagcctacgaagtgttagtta  
gaggttcgaatcctctattctgcacca  
1-9tRNA-Leu(caa)c[61944,62021]  
gttcagtatcccaattggcagaggatgcaagctcaaacctgtattagt  
gacgggtcgaatccgtcttggaacacca  
1-10tRNA-Val(tac)c[62023,62097]  
gctcgcttagtttatatggtaaagccccatccttacaagttggtgaagaa  
ggttcaagtccttcagcaggtacca  
1-11tRNA-Thr(tgt)c[62192,62267]  
gctcctatcgataactggctattacggttgcttgaagcaacttatca  
gggttcgaatccttgtgggagcacca  
1-12tRNA-Gly(tcc)c[62274,62348]  
gcatccatagtttaaacgggaaaattacagtcctccaaactgaggttgag  
ggttcgattccctctggatgctcca  
1-13tRNA-Ala(tgc)c[62355,62430]  
ggggatgtagtttacatgggtaaaacataagtttgcaaacttaagtaca  
gggttcaattccctgcttctccacca  
1-14tRNA-Lys(ctt)c[62437,62512]  
gcaggtgtagcaaaatgggttatgcggctgactcttaacagtaagacgat  
gggttcaattccctccacctgtacca  
1-15tRNA-Leu(tag)c[62520,62596]  
gcacctatagcccaattggaagaggcagcagacttagaatctgctcagt  
tgagttcgagtcctcttaggtgtacca  
1-16tRNA-Ser(tga)c[62848,62937]  
ggtaggtagcggctaattggaagccaaactgtctgaaaacagttgccatt  
gtagagatacggtaggggtcgactccttatctaccgcc  
1-17tRNA-Arg(tct)c[63328,63404]  
gcacccttagttcaaacggatagagcaacggcttctaaccgtcagtta  
caggttcgaatcctgtaggggtgtacca  
1-19tRNA-Ile(gat)c[63682,63757]  
gctggtatagttaagacggttataacactcccctgataagggaacatcgg  
tggttcgattccacctaccagtacca  
1-20tRNA-Met(cat)c[63760,63836]  
ggttcagtcgcagataaggtaatgaagggttcataagccctatgaatg  
tgggttcgattccacctgaacctcca  
1-21tRNA-Lys(ttt)c[63843,63918]  
ggaagtgtagcagaatgggtgatgcggcagacttttaactctgacaggcgat  
gggttcgaatccctccacttctacca  
1-22tRNA-Asp(gtc)c[64346,64422]



ggttatgtagttaactggataaaatacctccctgtcacgaggatgatg  
agggttcgattcccttcgtaaccgcca  
1-23tRNA-Asn(gtt)c[64528,64603]  
ggtaagtttagctaacttggtaaagcgctgactgttaatcagcgatatca  
gggttcaaatccctgacttaccgcca  
1-24tRNA-Met(cat)c[64688,64764]  
tgcgggtatagagaaaggcgctctcacatgtctcattagcatggatcgg  
taggttcgactcctacacccgcctcca  
1-25tRNA-Glu(ttc)c[64851,64928]  
attcccgtagacaaattaggtaaagtcaacacccttcaaggtgtggtt  
gagggttcaagtccttcgggaatgcca  
1-26tRNA-Pro(tgg)c[64935,65011]  
ctccatttagctcagcttggtagagcgttcggttggggcggtaaggccg  
aaggttcaagtccttcaatggagacca

>KM236246.1 Bacillus phage Moonbeam, complete genome

1-1tRNA-Ser(gct)[28945,29034]  
tggaggggtactctagcggtcgatgaggttcggttgcataaccggatagac  
gggtaaaaccgtgcgagagttcgaatctctccctccgt  
1-2tRNA-Asn(gtt)[29314,29388]  
tgactagtagctcagtggttagagcaatcggtgttaaccgatcggtcgt  
ggttcgagtcctacctagtcagcca  
1-3tRNA-Trp(cca)[29391,29464]  
tatcgagctagtgtaatggttagcacaggagctccaaaactttagtctg  
ggttcaaatcctaggttcggtgtc

>KM606994.1 Enterobacteria phage RB3, complete genome

1-1tRNA-Arg(tct)c[67424,67499]  
cgaggcatagctcagaaggaagagcaaggaccttctaagtcctgggtcgt  
aggttcgatccctactgcctcgacca  
1-2tRNA-Asn(gtt)c[67504,67578]  
ggatgttagctcaatggcagagcgatcgctgttaagcgattggttata  
ggttcgaatcctatcacgtccgcca  
1-3tRNA-Tyr(gta)c[67583,67669]  
ggggagtatcccgtaggtagcgggtgtggactgtaaatccattgtcat  
tgcgactcgggtggttcgactccatcactccccacca  
1-4tRNA-Met(cat)c[67679,67753]  
ggccctgtagctggaaggttcaagcaagcgactcataatcgccagatggt  
ggttcaattccaccagggccacca  
1-5tRNA-Thr(tgt)c[67755,67830]  
gctgatttagctcagtaggttagagcacctcacttgaatgaggatgtcgg  
cgggtcgattccgtcaatcagcgcca  
1-6tRNA-Ser(tga)c[67836,67925]  
ggaggcgtggcagagtgtttaatgcaccggtcttgaaccggcagtcg  
ctccggcgactcataggttcaaatcctatcgctccgcca  
1-7tRNA-Pro(tgg)c[67927,68001]

ctccgtgtagctcagtttggtagagcgctgattgggatcaggaggtcc

aaggttcaaatccttgatggagac

1-8tRNA-Gly(tcc)[68012,68085]

gcggatatcgataatggcattacctcagactccaatctgatgatga

gttcgattctcattatccgtcca

1-9tRNA-Leu(taa)[68091,68177]

gcgagaatggtaaattggtaaaggcacagcacttaaaatgctgcggaat

gatttccttggtggttcgagtccttctcgacca

1-10tRNA-Gln(ttg)[68178,68251]

tggaattagccaagttgtaaggcactggatttgattccaggatgcaa

aggttcgagtcctttattcccagc

>LN681537.2 Clostridium phage phiCD211, complete genome

1-1tRNA-Ser(gct)[6133,6223]

ggagagggtactcaagtggtaaaggatagtttgctaaactattaggtca

attaattgatacagggttcaaatcccttctctctcca

>KU686201.1 Synechococcus phage S-CAM4 isolate 0809SB33, complete genome

1-1tRNA-Met(cat)[17049,17124]

tgcttccttagcaatctgggaatgcagcaaaactcataattgcctaagg

agagttcgatcctctcaggaagcatc

1-2tRNA-Leu(taa)[17125,17211]

tcgagtatggcggaatcggtagacgcaccagactaaaatctgttgagc

attatgctcgtgggagttcaagtccttactcgcat

1-3tRNA-Thr(tgt)[18029,18101]

gccaaactagctcagtggttagagcagggtttgtaaagctcaggtcgca

ggttcaaatcctgtgttggtc

1-4tRNA-Asn(gtt)[18106,18177]

tcctcttagctcagcggtagagcggttgactgttaataattgtccct

ggttcgatcccaggaaggggag

1-5tRNA-Arg(tct)[158001,158077]

gactcagtagctcagttggatagagcaatgccttctaagcagtcggtcg

ttggttcgagtcacactgagtcgcca

1-6tRNA-Leu(tag)[158078,158160]

gtcggtatggcggaattggtagacgcgccaggttaggttctggtgtctt

atgacgtggaggttcaagtcctcttaccgacac

1-7tRNA-Val(tac)[158163,158234]

gctcgaatagctcaggttagagcacctcctttacacggagattgtcggg

ggttcgatcccctcttcgagca

1-8tRNA-Gly(tcc)[161371,161442]

gcgggtgtagctcagtggttagagcgtcagtttccaaactgaatgtcgtc

ggttcaagtccgatctcccgt

>HQ317290.1 Synechococcus phage S-RIM2 R21\_2007, complete genome

1-1tRNA-Val(tac)[13794,13865]

gcccgaatagctcagcggtagagcacctcctttacacggagattgtcggg

ggttcgatcccctcttcgggca

1-2tRNA-Leu(taa)[17791,17877]  
tgggagtatggcggaatcggtagacgcaccagactaaaattgttgagg  
gttaacctcgtgagagttcaagtctctactcctat  
1-3tRNA-Thr(tgt)[17934,18006]  
gccccgtagctcagtggttagagcagggtttgttaaagctcaggtcgca  
agttcaaatctgtcaggggctc  
1-4tRNA-Ala(tgc)[18009,18081]  
ggggaattagctcagttggttagagcgctgttgcaagcaggatgtcag  
cgggtcagatccgctattctcca  
1-5tRNA-Asn(gtt)[18128,18201]  
ttcctcagtagctcagcggcagagccatcgactgttaatcgattggtcgt  
aggttcaaatcctacctggggagt  
1-6tRNA-Arg(tct)[161238,161312]  
tgggtcagtagctcagcggatagagcaaccgcctctaagcgggttggtcg  
caggttcaaatcctgcctgacccgt

>KJ019029.1 *Synechococcus* phage ACG-2014d isolate Syn7803C46, complete genome

1-1tRNA-Val(tac)[13618,13691]  
tgggtgattaactcagtggttagagtgactgtttacacgcagtaggtcac  
tggttcaaatccagtattacccat  
1-2tRNA-Arg(tct)[153719,153793]  
tgggcaagtagctcagtggttagagcatcgacttctaatacggttggtcg  
ggggttcaaatccctccttgcctcgt  
1-3tRNA-Asn(gtt)[153814,153887]  
ttcccaagtagctcagtggttagagccgctgttaatcggctgggtcgc  
tggttcaaatccagccttgggagt

>KJ019028.1 *Synechococcus* phage ACG-2014d isolate Syn7803C45, complete genome

1-1tRNA-Val(tac)[13624,13697]  
tgggtgattaactcagtggttagagtgactgtttacacgcagtaggtcac  
tggttcaaatccagtattacccat  
1-2tRNA-Arg(tct)[153727,153801]  
tgggcaagtagctcagtggttagagcatcgacttctaatacggttggtcg  
ggggttcaaatccctccttgcctcgt  
1-3tRNA-Asn(gtt)[153822,153895]  
ttcccaagtagctcagtggttagagccgctgttaatcggctgggtcgc  
tggttcaaatccagccttgggagt

>KX349226.1 *Synechococcus* phage S-RIM2 isolate Fa\_02\_0709, complete genome

1-1tRNA-Val(tac)[13788,13859]  
gcccgaatagctcagcggtagagcacctcgtttacaccgagattgtcggc  
ggttcgatcccgctcttcgggca  
1-2tRNA-Leu(taa)[17785,17871]  
tgggagtatggcggaatcggtagacgcaccagactaaaattgttgagg  
gttaacctcgtgagagttcaagtctctactcctat  
1-3tRNA-Thr(tgt)[17928,18000]  
gccccgtagctcagtggttagagcagggtttgttaaagctcaggtcgca

agttcaaatctgtcaggggctc  
1-4tRNA-Ala(tgc)[18003,18075]  
ggggaattagctcagttggtagagcgctgcttgcaagcaggatgtcag  
cgggtcagatccgctattctcca  
1-5tRNA-Asn(gtt)[18122,18195]  
ttcctcagtagctcagcggcagagccatcgactgtaatcgattggtcgt  
aggttcaaatcctacctggggagt  
1-6tRNA-Arg(tct)[161217,161291]  
tgggtcagtagctcagcggatagagcaaccgccttctaagcggttggtcg  
caggttcaaatcctgcctgacccgt

>KX349227.1 Synechococcus phage S-RIM2 isolate Fa\_10\_0709, complete genome

1-1tRNA-Val(tac)[13794,13865]  
gcccgaatagctcagcggtagagcacctcgttacaccgagattgtcggc  
ggttcgatcccctcttcgggca  
1-2tRNA-Leu(taa)[17791,17877]  
tgggagtatggcggaaatcggtagacgcaccagacttaaaattgttgagg  
gttaacctcgtgagagttcaagtctctactcctat  
1-3tRNA-Thr(tgt)[17934,18006]  
gccccctagctcagtggttagagcagggtttgttaaagctcaggtcgca  
agttcaaatctgtcaggggctc  
1-4tRNA-Ala(tgc)[18009,18081]  
ggggaattagctcagttggtagagcgctgcttgcaagcaggatgtcag  
cgggtcagatccgctattctcca  
1-5tRNA-Asn(gtt)[18128,18201]  
ttcctcagtagctcagcggcagagccatcgactgtaatcgattggtcgt  
aggttcaaatcctacctggggagt  
1-6tRNA-Arg(tct)[161239,161313]  
tgggtcagtagctcagcggatagagcaaccgccttctaagcggttggtcg  
caggttcaaatcctgcctgacccgt

>KX349228.1 Synechococcus phage S-RIM2 isolate Fa\_24\_0709, complete genome

1-1tRNA-Val(tac)[13794,13865]  
gcccgaatagctcagcggtagagcacctcgttacaccgagattgtcggg  
ggttcgatcccctcttcgggca  
1-2tRNA-Leu(taa)[17791,17877]  
tgggagtatggcggaaatcggtagacgcaccagacttaaaattgttgagg  
gttaacctcgtgagagttcaagtctctactcctat  
1-3tRNA-Thr(tgt)[17934,18006]  
gccccctagctcagtggttagagcagggtttgttaaagctcaggtcgca  
agttcaaatctgtcaggggctc  
1-4tRNA-Ala(tgc)[18009,18081]  
ggggaattagctcagttggtagagcgctgcttgcaagcaggatgtcag  
cgggtcagatccgctattctcca  
1-5tRNA-Asn(gtt)[18128,18201]  
ttcctcagtagctcagcggcagagccatcgactgtaatcgattggtcgt

aggttcaaatcctacctggggagt  
1-6tRNA-Arg(tct)[161237,161311]  
tgggtcagtagctcagcggatagagcaaccgccttctaagcggttggtcg  
caggttcaaatcctgcctgacccgt

>KX349229.1 Synechococcus phage S-RIM2 isolate LIS\_01\_1010, complete genome

1-1tRNA-Val(tac)[13895,13966]  
gcccgaaatagctcagcggtagagcacctcgttacaccgagattgtcggc  
ggttcgatcccgtcttcgggca  
1-2tRNA-Leu(taa)[17892,17978]  
tgggagtatggcggaatcggtagacgcaccagactaaaattgttgagg  
gttaacctcgtgagagttcaagtcctctactcctat  
1-3tRNA-Thr(tgt)[18035,18110]  
gccttctagctcagctggatagagcaacggttttaaaccgtaggtcg  
tcggttcaagtccgacagaaggctcc  
1-4tRNA-Ala(tgc)[18112,18187]  
tggggaattagctcagttggtagtagcgtttgcttgaagcaaatgtc  
agcggttcgagtcgcctattctccat  
1-5tRNA-Asn(gtt)[18233,18306]  
ttcctcagtagctcagcggcagagctatcgactgttaatcgattggctcg  
aggttcaaatcctacctggggagt  
1-6tRNA-Arg(tct)[160889,160963]  
tgggtcagtagctcagcggatagagcaaccgccttctaagcggttggtcg  
caggttcaaatcctgcctgacccgt

>KX349230.1 Synechococcus phage S-RIM2 isolate LIS\_02\_1013, complete genome

1-1tRNA-Val(tac)[13794,13865]  
gcccgaaatagctcagcggtagagcacctcgttacaccgagattgtcggg  
ggttcgatcccctcttcgggca  
1-2tRNA-Leu(taa)[17791,17877]  
tgggagtatggcggaatcggtagacgcaccagactaaaattgttgagg  
gttaacctcgtgagagttcaagtcctctactcctat  
1-3tRNA-Thr(tgt)[17934,18006]  
gccccgtagctcagtggtagagcagggtttgtaaagctcaggtcgca  
agttcaaatcttgcaggggctc  
1-4tRNA-Ala(tgc)[18352,18425]  
ggggaattagctcagtcgtggtagagcgcttgcattgaagcaggatgtca  
gcggttcgagtcgcctattctcca  
1-5tRNA-Asn(gtt)[18472,18545]  
ttcctcagtagctcagcggcagagccatcgactgttaatcgattggctcg  
aggttcaaatcctacctggggagt  
1-6tRNA-Arg(tct)[161584,161658]  
tgggtcagtagctcagcggatagagcaaccgccttctaagcggttggtcg  
caggttcaaatcctgcctgacccgt

>KX349231.1 Synechococcus phage S-RIM2 isolate LIS\_06\_1010, complete genome

1-1tRNA-Val(tac)[13904,13975]

gcccgaatagctcagcggtagagcacctcgtttacaccgagattgtcggc  
ggttcgatcccgtcttcgggca  
1-2tRNA-Leu(taa)[17901,17987]  
tgggagtatggcggaatcggtagacgcaccagactaaaattgttgagg  
gttaacctcgtgagagttcaagtctctactcctat  
1-3tRNA-Thr(tgt)[18044,18116]  
gccccctagctcagtggttagagcagggtttgtaaagctcaggtcgca  
agttcaaatctgtcaggggctc  
1-4tRNA-Ala(tgc)[18462,18535]  
ggggaattagctcagtcgtgtagagcgctgctttgcaagcaggatgtca  
cggttcgagtcgctattctcca  
1-5tRNA-Asn(gtt)[18582,18655]  
ttcctcagtagctcagcggcagagctatcgactgttaatcgattggctgt  
aggttcaaatcctacctggggagt  
1-6tRNA-Arg(tct)[161246,161320]  
tgggtcagtagctcagcggatagagcaaccgccttctaagcggttggtcg  
caggttcaaatcctgcctgacccgt

>KX349232.1 Synechococcus phage S-RIM2 isolate LIS\_09\_1010, complete genome

1-1tRNA-Val(tac)[13785,13856]  
gcccgaatagctcagcggtagagcacctcgtttacaccgagattgtcggc  
ggttcgatcccgtcttcgggca  
1-2tRNA-Leu(taa)[17783,17867]  
gggagtatggcggaatcggtagacgcaccagactaaaattgttgaggg  
ttaacctcgtgagagttcaagtctctactccta  
1-3tRNA-Thr(tgt)[17925,17997]  
gccccctagctcagtggttagagcagggtttgtaaagctcaggtcgca  
agttcaaatctgtcaggggctc  
1-4tRNA-Ala(tgc)[18000,18072]  
ggggaattagctcagttggttagagcgctgctttgcaagcaggatgtcag  
cggttcgagtcgctattctcca  
1-5tRNA-Asn(gtt)[18119,18192]  
ttcctcagtagctcagcggcagagccatcgactgttaatcgattggctgt  
aggttcaaatcctacctggggagt  
1-6tRNA-Arg(tct)[161238,161312]  
tgggtcagtagctcagcggatagagcaaccgccttctaagcggttggtcg  
caggttcaaatcctgcctgacccgt

>KX349233.1 Synechococcus phage S-RIM2 isolate LIS\_11\_1010, complete genome

1-1tRNA-Val(tac)[13806,13877]  
gcccgaatagctcagcggtagagcacctcgtttacaccgagattgtcggc  
ggttcgatcccctcttcgggca  
1-2tRNA-Leu(taa)[17804,17888]  
gggagtatggcggaatcggtagacgcaccagactaaaattgttgaggg  
ttaacctcgtgagagttcaagtctctactccta  
1-3tRNA-Thr(tgt)[17946,18018]

gccccgtagctcagtggtagagcaggcctttgtaaagctcaggtcgca  
agttcaaatctgtcaggggctc  
1-4tRNA-Ala(tgc)[18021,18093]  
ggggaattagctcagttggtagagcgctctgttgcaagcaggatgtcag  
cggttcgagtcgctattctcca  
1-5tRNA-Asn(gtt)[18140,18213]  
ttctcagtagctcagcggcagagccatcgactgttaatcgattggtcgt  
aggttcaaatcctacctggggagt  
1-6tRNA-Arg(tct)[161254,161328]  
tgggtcagtagctcagcggatagagcaaccgccttctaagcggttggtcg  
caggttcaaatcctgcctgaccgt

>KX349234.1 Synechococcus phage S-RIM2 isolate LIS\_12\_1010, complete genome

1-1tRNA-Val(tac)[13892,13963]  
gcccgaatagctcagcggtagagcacctcgtttacaccgagattgtcggc  
ggttcgatcccctcttcgggca  
1-2tRNA-Leu(taa)[17889,17975]  
tgggagtatggcggaatcggtagacgcaccagacttaaaattgttgagg  
gttaacctcgtgagagttcaagtctctactcctat  
1-3tRNA-Thr(tgt)[18032,18105]  
gccccgtagctcagtggtagagcaggcctttgtaaagctcaggtcgca  
agttcaaatctgtcaggggctcc  
1-4tRNA-Ala(tgc)[18107,18182]  
tggggaattagctcagtcgtggtagagcgctctgttgcaagcaggatgtc  
agcggttcgagtcgctattctccat  
1-5tRNA-Asn(gtt)[18228,18301]  
ttctcagtagctcagcggcagagctatcgactgttaatcgattggtcgt  
aggttcaaatcctacctggggagt  
1-6tRNA-Arg(tct)[160890,160964]  
tgggtcagtagctcagcggatagagcaaccgccttctaagcggttggtcg  
caggttcaaatcctgcctgaccgt

>KX349235.1 Synechococcus phage S-RIM2 isolate LIS\_14\_1013, complete genome

1-1tRNA-Val(tac)[13797,13868]  
gcccgaatagctcagcggtagagcacctcgtttacaccgagattgtcggg  
ggttcgatcccctcttcgggca  
1-2tRNA-Leu(taa)[17794,17880]  
tgggagtatggcggaatcggtagacgcaccagacttaaaattgttgagg  
gttaacctcgtgagagttcaagtctctactcctat  
1-3tRNA-Thr(tgt)[17937,18009]  
gccccgtagctcagtggtagagcaggcctttgtaaagctcaggtcgca  
agttcaaatctgtcaggggctc  
1-4tRNA-Ala(tgc)[18012,18084]  
ggggaattagctcagttggtagagcgctctgttgcaagcaggatgtcag  
cggttcgagtcgctattctcca  
1-5tRNA-Asn(gtt)[18131,18204]

ttcctcagtagctcagcggcagagccatcgactgtaatcgattggtcgt  
aggttcaaatacctacgtgggagt  
1-6tRNA-Arg(tct)[161246,161320]  
tgggtcagtagctcagcggatagagcaaccgccttctaagcgggtggtcg  
caggttcaaatacctgcctgacccgt

>KX349236.1 Synechococcus phage S-RIM2 isolate NJ\_05\_1013, complete genome

1-1tRNA-Val(tac)[13791,13862]  
gcccgaatagctcagcggtagagcacctcgttacaccgagattgtcggc  
ggttcgatcccctcttcgggca  
1-2tRNA-Leu(taa)[17788,17874]  
tgggagtagtggcggaatcggtagacgcaccagacttaaaattgttgagg  
gttaacctcgtgagagttcaagtctctactcctat  
1-3tRNA-Thr(tgt)[17931,18003]  
gccccctagctcagtggttagagcagggtttgtaaagctcaggtcgca  
agttcaaatacctgtcaggggctc  
1-4tRNA-Ala(tgc)[18006,18078]  
ggggaattagctcagttggttagagcgctgcttgcagcaggatgtcag  
cgggtcgagtcgctatttcca  
1-5tRNA-Asn(gtt)[18125,18198]  
ttcctcagtagctcagcggcagagccatcgactgtaatcgattggtcgt  
aggttcaaatacctacgtgggagt  
1-6tRNA-Arg(tct)[160088,160162]  
tgggtcagtagctcagcggatagagcaaccgccttctaagcgggtggtcg  
caggttcaaatacctgcctgacccgt

>KX349237.1 Synechococcus phage S-RIM2 isolate Np\_01\_0709, complete genome

1-1tRNA-Val(tac)[13794,13865]  
gcccgaatagctcagcggtagagcacctcgttacaccgagattgtcggg  
ggttcgatcccctcttcgggca  
1-2tRNA-Leu(taa)[17792,17876]  
gggagtagtggcggaatcggtagacgcaccagacttaaaattgttgagg  
ttaacctcgtgagagttcaagtctctactccta  
1-3tRNA-Thr(tgt)[17934,18006]  
gccccctagctcagtggttagagcagggtttgtaaagctcaggtcgca  
agttcaaatacctgtcaggggctc  
1-4tRNA-Ala(tgc)[18009,18081]  
ggggaattagctcagttggttagagcgctgcttgcagcaggatgtcag  
cgggtcgagtcgctatttcca  
1-5tRNA-Asn(gtt)[18128,18201]  
ttcctcagtgccgcagcggtagcgcagttgactgtaataatgggtcgc  
aagttcgaatactgcctgggagt  
1-6tRNA-Arg(tct)[161147,161221]  
tgggtcagtagctcagcggatagagcaaccgccttctaagcgggtggtcg  
caggttcaaatacctgcctgacccgt

>KX349238.1 Synechococcus phage S-RIM2 isolate Np\_01\_1112, complete genome



1-tRNA-Val(tac)[13794,13865]  
gccccaatagctcagcggtagacacctcggttacaccgagattgtcggc  
ggttcgatcccgtcttcgggca  
1-2tRNA-Leu(taa)[17791,17877]  
tgaggatgatggcggaatcggtagacgcaccagactaaaattgttgagg  
gttaacctcgtgagagttcaagtctctactcctat  
1-3tRNA-Thr(tgt)[17934,18006]  
gccccgtagctcagtggttagagcagggtttgtaaagctcaggtcgca  
agttcaaatctgtcaggggctc  
1-4tRNA-Ala(tgc)[18009,18081]  
ggggaattagctcagttggttagagcgctgctttgcaagcaggatgtcag  
cgggtcagtcgcgtattctcca  
1-5tRNA-Asn(gtt)[18128,18201]  
ttcctcagtagctcagcggcagagccatcgactgttaatcgattggctgt  
aggttcaaatcctacctggggagt  
1-6tRNA-Arg(tct)[161239,161313]  
tgggtcagtagctcagcggtagagcaaccgccttctaagcgggttggtcg  
caggttcaaatcctgcctgacccgt

>KX349239.1 Synechococcus phage S-RIM2 isolate Np\_03\_0709, complete genome

1-tRNA-Val(tac)[13794,13865]  
gccccaatagctcagcggtagacacctcggttacaccgagattgtcggc  
ggttcgatcccgtcttcgggca  
1-2tRNA-Leu(taa)[17791,17877]  
tgaggatgatggcggaatcggtagacgcaccagactaaaattgttgagg  
gttaacctcgtgagagttcaagtctctactcctat  
1-3tRNA-Thr(tgt)[17934,18006]  
gccccgtagctcagtggttagagcagggtttgtaaagctcaggtcgca  
agttcaaatctgtcaggggctc  
1-4tRNA-Ala(tgc)[18009,18081]  
ggggaattagctcagttggttagagcgctgctttgcaagcaggatgtcag  
cgggtcagtcgcgtattctcca  
1-5tRNA-Asn(gtt)[18128,18201]  
ttcctcagtagctcagcggcagagccatcgactgttaatcgattggctgt  
aggttcaaatcctacctggggagt  
1-6tRNA-Arg(tct)[161241,161315]  
tgggtcagtagctcagcggtagagcaaccgccttctaagcgggttggtcg  
caggttcaaatcctgcctgacccgt

>KX349240.1 Synechococcus phage S-RIM2 isolate Np\_03\_1112, complete genome

1-tRNA-Val(tac)[13785,13856]  
gccccaatagctcagcggtagacacctcggttacaccgagattgtcggc  
ggttcgatcccgtcttcgggca  
1-2tRNA-Leu(taa)[17783,17867]  
gggagatgatggcggaatcggtagacgcaccagactaaaattgttgagg  
gttaacctcgtgagagttcaagtctctactccta

1-3tRNA-Thr(tgt)[17925,17997]  
gccccctagctcagtggtagagcaggcctttgtaaagctcaggtcgca  
agttcaaatctgtcaggggctc  
1-4tRNA-Ala(tgc)[18000,18072]  
ggggaattagctcagttggtagagcgctgctttgcaagcaggatgtcag  
cgggtcagatccgctatttctcca  
1-5tRNA-Asn(gtt)[18119,18192]  
ttctcagtagctcagcggcagagccatcgactgtaatcgattggtcgt  
aggttcaaatcctacctggggagt  
1-6tRNA-Arg(tct)[160071,160145]  
tgggtcagtagctcagcggatagagcaaccgccttctaagcggttggtcg  
caggttcaaatcctgcctgacccgt

>KX349241.1 Synechococcus phage S-RIM2 isolate Np\_04\_1112, complete genome

1-1tRNA-Val(tac)[13797,13868]  
gcccgaatagctcagcggtagagcacctcgtttacaccgagattgtcggg  
ggttcgatcccctcttcgggca  
1-2tRNA-Leu(taa)[17795,17879]  
gggagtatggcggaatcggtagacgcaccagacttaaaattgttgaggg  
ttaacctcgtgagagttcaagtctcttactccta  
1-3tRNA-Thr(tgt)[17937,18009]  
gccccctagctcagtggtagagcaggcctttgtaaagctcaggtcgca  
agttcaaatctgtcaggggctc  
1-4tRNA-Ala(tgc)[18012,18084]  
ggggaattagctcagttggtagagcgctgctttgcaagcaggatgtcag  
cgggtcagatccgctatttctcca  
1-5tRNA-Asn(gtt)[18131,18204]  
ttctcagtagctcagcggcagagccatcgactgtaatcgattggtcgt  
aggttcaaatcctacctggggagt  
1-6tRNA-Arg(tct)[161244,161318]  
tgggtcagtagctcagcggatagagcaaccgccttctaagcggttggtcg  
caggttcaaatcctgcctgacccgt

>KX349242.1 Synechococcus phage S-RIM2 isolate Np\_06\_0912, complete genome

1-1tRNA-Val(tac)[13799,13870]  
gcccgaatagctcagcggtagagcacctcgtttacaccgagattgtcggg  
ggttcgatcccctcttcgggca  
1-2tRNA-Leu(taa)[17797,17881]  
gggagtatggcggaatcggtagacgcaccagacttaaaattgttgaggg  
ttaacctcgtgagagttcaagtctcttactccta  
1-3tRNA-Thr(tgt)[17939,18011]  
gccccctagctcagtggtagagcaggcctttgtaaagctcaggtcgca  
agttcaaatctgtcaggggctc  
1-4tRNA-Ala(tgc)[18014,18086]  
ggggaattagctcagttggtagagcgctgctttgcaagcaggatgtcag  
cgggtcagatccgctatttctcca

1-5tRNA-Asn(gtt)[18133,18206]  
ttcctcagtagcgtagcgtagcagtgactgtaataatgggtcgc  
aagttcgaatcttgctggggagt  
1-6tRNA-Arg(tct)[161247,161321]  
tgggtcagtagctcagcgtagagcaaccgccttctaagcggttggtcg  
caggttcaaatcctgcctgaccgt

>KX349243.1 Synechococcus phage S-RIM2 isolate Np\_11\_1112, complete genome

1-1tRNA-Val(tac)[13800,13871]  
gcccgaatagctcagcgtagagcacctcgttacaccgagattgtcggc  
ggttcgatcccgctctcgggca  
1-2tRNA-Leu(taa)[17797,17883]  
tgggagtagcggaatcgtagacgcaccagacttaaaattgttgagg  
gttaacctcgtgagagttcaagtctctactcctat  
1-3tRNA-Thr(tgt)[17940,18012]  
gccccgtagctcagtgtagagcaggcctttgtaaagctcaggtcgca  
agttcaaatcttgtaggggctc  
1-4tRNA-Ala(tgc)[18015,18087]  
ggggaattagctcagttgtagagcgctgcttgcaagcaggatgtcag  
cgggttcgagtcgcgtattctcca  
1-5tRNA-Asn(gtt)[18134,18207]  
ttcctcagtagctcagcgtagagccatcgactgtaatacgattggtcgt  
aggttcaaatcctacgtggggagt  
1-6tRNA-Arg(tct)[161249,161323]  
tgggtcagtagctcagcgtagagcaaccgccttctaagcggttggtcg  
caggttcaaatcctgcctgaccgt

>KX349244.1 Synechococcus phage S-RIM2 isolate Np\_12\_0912, complete genome

1-1tRNA-Val(tac)[13797,13868]  
gcccgaatagctcagcgtagagcacctcgttacaccgagattgtcggc  
ggttcgatcccgctctcgggca  
1-2tRNA-Leu(taa)[17794,17880]  
tgggagtagcggaatcgtagacgcaccagacttaaaattgttgagg  
gttaacctcgtgagagttcaagtctctactcctat  
1-3tRNA-Thr(tgt)[17937,18009]  
gccccgtagctcagtgtagagcaggcctttgtaaagctcaggtcgca  
agttcaaatcttgtaggggctc  
1-4tRNA-Ala(tgc)[18012,18084]  
ggggaattagctcagttgtagagcgctgcttgcaagcaggatgtcag  
cgggttcgagtcgcgtattctcca  
1-5tRNA-Asn(gtt)[18131,18204]  
ttcctcagtagcgtagcgtagcagtgactgtaataatgggtcgc  
aagttcgaatcttgctggggagt  
1-6tRNA-Arg(tct)[161247,161321]  
tgggtcagtagctcagcgtagagcaaccgccttctaagcggttggtcg  
caggttcaaatcctgcctgaccgt

>KX349245.1 Synechococcus phage S-RIM2 isolate Np\_14\_0912, complete genome

1-1tRNA-Val(tac)[13782,13853]  
ccccgaatagctcagcggtagagcacctcgttacaccgagattgtcggc  
ggttcgatcccgctcttcgggca  
1-2tRNA-Leu(taa)[17779,17865]  
tgggagtagggcggaatcggtagacgcaccagacttaaaattgttgagg  
gttaacctcgtgagagttcaagtctctactcctat  
1-3tRNA-Thr(tgt)[17922,17994]  
gccccctagctcagtggttagagcagggtttgtaaagctcaggtcgca  
agttcaaatctgtcaggggctc  
1-4tRNA-Ala(tgc)[17997,18069]  
ggggaattagctcagttggtagagcgctgcttgcaagcaggatgtcag  
cggttcgagtcgctattctcca  
1-5tRNA-Asn(gtt)[18116,18189]  
ttcctcagtagctcagcggcagagccatcgactgttaatcgattggtcgt  
aggttcaaatcctacctggggagt  
1-6tRNA-Arg(tct)[161229,161303]  
tgggtcagtagctcagcggtatagcaaccgccttctaagcggttggtcg  
caggttcaaatcctgcctgacccgt

>KX349246.1 Synechococcus phage S-RIM2 isolate Np\_15\_0709, complete genome

1-1tRNA-Val(tac)[13809,13880]  
ccccgaatagctcagcggtagagcacctcgttacaccgagattgtcggc  
ggttcgatcccgctcttcgggca  
1-2tRNA-Leu(taa)[17806,17892]  
tgggagtagggcggaatcggtagacgcaccagacttaaaattgttgagg  
gttaacctcgtgagagttcaagtctctactcctat  
1-3tRNA-Thr(tgt)[17949,18021]  
gccccctagctcagtggttagagcagggtttgtaaagctcaggtcgca  
agttcaaatctgtcaggggctc  
1-4tRNA-Ala(tgc)[18024,18096]  
ggggaattagctcagttggttagagcgctgcttgcaagcaggatgtcag  
cggttcgagtcgctattctcca  
1-5tRNA-Asn(gtt)[18143,18216]  
ttcctcagtagctcagcggcagagccatcgactgttaatcgattggtcgt  
aggttcaaatcctacctggggagt  
1-6tRNA-Arg(tct)[161262,161336]  
tgggtcagtagctcagcggtatagcaaccgccttctaagcggttggtcg  
caggttcaaatcctgcctgacccgt

>KX349247.1 Synechococcus phage S-RIM2 isolate Np\_15\_1112, complete genome

1-1tRNA-Val(tac)[13794,13865]  
ccccgaatagctcagcggtagagcacctcgttacaccgagattgtcggc  
ggttcgatcccgctcttcgggca  
1-2tRNA-Leu(taa)[17791,17877]  
tgggagtagggcggaatcggtagacgcaccagacttaaaattgttgagg

gttaacctcgtgagagttcaagtctctactcctat  
1-3tRNA-Thr(tgt)[17934,18006]  
gccccgtagctcagtggttagagcaggcctttgtaaagctcaggtcgca  
agttcaaatctgtcaggggctc  
1-4tRNA-Ala(tgc)[18009,18081]  
ggggaattagctcagttggttagagcgctgctttgcaagcaggatgtcag  
cgggtcagtcgctattctcca  
1-5tRNA-Asn(gtt)[18128,18201]  
ttcctcagtagctcagcggcagagccatcgactgttaatcgattggctgt  
aggttcaaatcctacctggggagt  
1-6tRNA-Arg(tct)[161244,161318]  
tgggtcagtagctcagcggatagagcaaccgccttctaagcggttggtcg  
caggttcaaatcctgcctgacccgt

>KX349248.1 Synechococcus phage S-RIM2 isolate Np\_19\_1112, complete genome

1-1tRNA-Val(tac)[13788,13859]  
gcccgaatagctcagcggtagagcacctcgtttacaccgagattgtcggg  
ggttcgatcccctcttcgggca  
1-2tRNA-Leu(taa)[17785,17871]  
tgggagtagggcgaatcggttagacgcaccagactaaaattgttgagg  
gttaacctcgtgagagttcaagtctctactcctat  
1-3tRNA-Thr(tgt)[17928,18000]  
gccccgtagctcagtggttagagcaggcctttgtaaagctcaggtcgca  
agttcaaatctgtcaggggctc  
1-4tRNA-Ala(tgc)[18003,18075]  
ggggaattagctcagttggttagagcgctgctttgcaagcaggatgtcag  
cgggtcagtcgctattctcca  
1-5tRNA-Asn(gtt)[18122,18195]  
ttcctcagtagctcagcggcagagccatcgactgttaatcgattggctgt  
aggttcaaatcctacctggggagt  
1-6tRNA-Arg(tct)[160075,160149]  
tgggtcagtagctcagcggatagagcaaccgccttctaagcggttggtcg  
caggttcaaatcctgcctgacccgt

>KX349250.1 Synechococcus phage S-RIM2 isolate Np\_23\_1112, complete genome

1-1tRNA-Val(tac)[13797,13868]  
gcccgaatagctcagcggtagagcacctcgtttacaccgagattgtcggc  
ggttcgatcccgtcttcgggca  
1-2tRNA-Leu(taa)[17795,17879]  
gggagtagggcgaatcggttagacgcaccagactaaaattgttgaggg  
ttaacctcgtgagagttcaagtctctactccta  
1-3tRNA-Thr(tgt)[17937,18009]  
gccccgtagctcagtggttagagcaggcctttgtaaagctcaggtcgca  
agttcaaatctgtcaggggctc  
1-4tRNA-Ala(tgc)[18012,18084]  
ggggaattagctcagttggttagagcgctgctttgcaagcaggatgtcag

cggttcgagtcgcgtattctcca  
1-5tRNA-Asn(gtt)[18131,18204]  
ttctcagtagctcagcggcagagccatcgactgtaatcgattggtcgt  
aggttcaaatcctacctggggagt  
1-6tRNA-Arg(tct)[161244,161318]  
tgggtcagtagctcagcggatagagcaaccgccttctaagcggttggtcg  
caggttcaaatcctgcctgacccgt

>KX349251.1 Synechococcus phage S-RIM2 isolate Np\_24\_1112, complete genome

1-1tRNA-Val(tac)[13794,13865]  
gcccgaatagctcagcggtagagcacctcgtttacaccgagattgtcggg  
ggttcgatcccctcttcgggca  
1-2tRNA-Leu(taa)[17791,17877]  
tgggagtatggcggaatcggtagacgcaccagacttaaaattgttgagg  
gttaacctcgtgagagttcaagtctcttactcctat  
1-3tRNA-Thr(tgt)[17934,18006]  
gccccgtagctcagtggttagagcagggctttgtaaagctcaggtcgca  
agttcaaatcttgtcaggggctc  
1-4tRNA-Ala(tgc)[18009,18081]  
ggggaattagctcagttggtagagcgctgctttgcaagcaggatgtcag  
cggttcgagtcgcgtattctcca  
1-5tRNA-Asn(gtt)[18128,18201]  
ttctcagtagctcagcggcagagccatcgactgtaatcgattggtcgt  
aggttcaaatcctacctggggagt  
1-6tRNA-Arg(tct)[161240,161314]  
tgggtcagtagctcagcggatagagcaaccgccttctaagcggttggtcg  
caggttcaaatcctgcctgacccgt

>KX349252.1 Synechococcus phage S-RIM2 isolate Np\_31\_1112, complete genome

1-1tRNA-Val(tac)[13782,13853]  
gcccgaatagctcagcggtagagcacctcgtttacaccgagattgtcggg  
ggttcgatcccctcttcgggca  
1-2tRNA-Leu(taa)[17780,17864]  
gggagtatggcggaatcggtagacgcaccagacttaaaattgttgagg  
ttaacctcgtgagagttcaagtctcttactccta  
1-3tRNA-Thr(tgt)[17922,17994]  
gccccgtagctcagtggttagagcagggctttgtaaagctcaggtcgca  
agttcaaatcttgtcaggggctc  
1-4tRNA-Ala(tgc)[17997,18069]  
ggggaattagctcagttggtagagcgctgctttgcaagcaggatgtcag  
cggttcgagtcgcgtattctcca  
1-5tRNA-Asn(gtt)[18116,18189]  
ttctcagtagctcagcggcagagccatcgactgtaatcgattggtcgt  
aggttcaaatcctacctggggagt  
1-6tRNA-Arg(tct)[161231,161305]  
tgggtcagtagctcagcggatagagcaaccgccttctaagcggttggtcg

caggttcaaatcctgcctgacccgt

>KX349253.1 Synechococcus phage S-RIM2 isolate Np\_33\_0912, complete genome

1-tRNA-Val(tac)[13791,13862]

gccccaatagctcagcggtagacacctcgttacaccgagattgtcggc

ggttcgatcccgctcttcgggca

1-2tRNA-Leu(taa)[17788,17874]

tgggagtatggcgaatcggtagacgcaccagactaaaattgttgagg

gttaacctcgtgagagttcaagtctctactcctat

1-3tRNA-Thr(tgt)[17931,18003]

gccccctagctcagtggtagagcaggcctttgtaaagctcaggtcgca

agttcaaatctgtcaggggctc

1-4tRNA-Ala(tgc)[18006,18078]

ggggaattagctcagttggtagagcgctgcttgcagcaggatgtcag

cgggtcagatccgctattctcca

1-5tRNA-Asn(gtt)[18125,18198]

ttctcagtagctcagcggcagagccatcgactgttaatcgattggctgt

aggttcaaatcctacctggggagt

1-6tRNA-Arg(tct)[161244,161318]

tgggtcagtagctcagcggtagagcaaccgccttctaagcggttggtcg

caggttcaaatcctgcctgacccgt

>KX349254.1 Synechococcus phage S-RIM2 isolate Np\_36\_1112, complete genome

1-tRNA-Val(tac)[13803,13874]

gccccaatagctcagcggtagacacctcgttacaccgagattgtcggc

ggttcgatcccgctcttcgggca

1-2tRNA-Leu(taa)[17800,17886]

tgggagtatggcgaatcggtagacgcaccagactaaaattgttgagg

gttaacctcgtgagagttcaagtctctactcctat

1-3tRNA-Thr(tgt)[17943,18015]

gccccctagctcagtggtagagcaggcctttgtaaagctcaggtcgca

agttcaaatctgtcaggggctc

1-4tRNA-Ala(tgc)[18018,18090]

ggggaattagctcagttggtagagcgctgcttgcagcaggatgtcag

cgggtcagatccgctattctcca

1-5tRNA-Asn(gtt)[18137,18210]

ttctcagtagctcagcggcagagccatcgactgttaatcgattggctgt

aggttcaaatcctacctggggagt

1-6tRNA-Arg(tct)[161247,161321]

tgggtcagtagctcagcggtagagcaaccgccttctaagcggttggtcg

caggttcaaatcctgcctgacccgt

>KX349255.1 Synechococcus phage S-RIM2 isolate RW\_01\_0709, complete genome

1-tRNA-Val(tac)[13791,13862]

gccccaatagctcagcggtagacacctcgttacaccgagattgtcggc

ggttcgatcccgctcttcgggca

1-2tRNA-Leu(taa)[17789,17873]

gggagtatggcggaatcggtagacgcaccagacttaaaattgttgagg  
ttaacctcgtgagagttcaagtctcttactccta  
1-3tRNA-Thr(tgt)[17931,18003]  
gccccgtagctcagtggttagagcagggtttgtaaagctcaggtcgca  
agttcaaatctgtcaggggctc  
1-4tRNA-Ala(tgc)[18006,18078]  
ggggaattagctcagttggttagagcgcttgcgaagcaggatgtcag  
cggttcgagtcgctattctcca  
1-5tRNA-Asn(gtt)[18125,18198]  
ttctcagtagctcagcggcagagccatcgactgtaatcgattggtcgt  
aggttcaaatcctacctggggagt  
1-6tRNA-Arg(tct)[161188,161262]  
tgggtcagtagctcagcggatagagcaaccgccttctaagcggttggtcg  
caggttcaaatcctgcctgacccgt

>KX349256.1 Synechococcus phage S-RIM2 isolate RW\_02\_0113, complete genome

1-1tRNA-Val(tac)[13794,13865]  
gcccgaatagctcagcggtagagcacctcgtttacaccgagattgtcggc  
ggttcgatcccgtcttcgggca  
1-2tRNA-Leu(taa)[17791,17877]  
tgggagtatggcggaatcggtagacgcaccagacttaaaattgttgagg  
gttaacctcgtgagagttcaagtctcttactcctat  
1-3tRNA-Thr(tgt)[17934,18006]  
gccccgtagctcagtggttagagcagggtttgtaaagctcaggtcgca  
agttcaaatctgtcaggggctc  
1-4tRNA-Ala(tgc)[18009,18081]  
ggggaattagctcagttggttagagcgcttgcgaagcaggatgtcag  
cggttcgagtcgctattctcca  
1-5tRNA-Asn(gtt)[18128,18201]  
ttctcagtagctcagcggcagagccatcgactgtaatcgattggtcgt  
aggttcaaatcctacctggggagt  
1-6tRNA-Arg(tct)[161241,161315]  
tgggtcagtagctcagcggatagagcaaccgccttctaagcggttggtcg  
caggttcaaatcctgcctgacccgt

>KX349257.1 Synechococcus phage S-RIM2 isolate RW\_02\_0709, complete genome

1-1tRNA-Val(tac)[13794,13865]  
gcccgaatagctcagcggtagagcacctcgtttacaccgagattgtcggc  
ggttcgatcccgtcttcgggca  
1-2tRNA-Leu(taa)[17791,17877]  
tgggagtatggcggaatcggtagacgcaccagacttaaaattgttgagg  
gttaacctcgtgagagttcaagtctcttactcctat  
1-3tRNA-Thr(tgt)[17934,18006]  
gccccgtagctcagtggttagagcagggtttgtaaagctcaggtcgca  
agttcaaatctgtcaggggctc  
1-4tRNA-Ala(tgc)[18009,18081]



ggggaattagctcagttggtagagcgctgctttgcaagcaggatgtcag  
cgggtcagtcgctattctcca  
1-5tRNA-Asn(gtt)[18128,18201]  
ttcctcagtagctcagcggcagagccatcgactgtaatcgattggtcgt  
aggttcaaatcctacctggggagt  
1-6tRNA-Arg(tct)[161238,161312]  
tgggtcagtagctcagcggatagagcaaccgccttctaagcggttggtcg  
caggttcaaatcctgcctgacccgt

>KX349258.1 Synechococcus phage S-RIM2 isolate RW\_03\_0709, complete genome

1-1tRNA-Val(tac)[13794,13865]  
gcccgaatagctcagcggtagagcagcacctttacacggatgaatgcggg  
ggttcgatcccctcttcgggca  
1-2tRNA-Leu(taa)[17791,17877]  
tgggagtagtcggaatcggtagacgcaccagactaaaattgttgagg  
gttaacctcgtgagagttcaagtctctactcctat  
1-3tRNA-Thr(tgt)[17934,18006]  
gccccgtagctcagtggttagagcaggcctttgtaaagctcaggtcgca  
agttcaaatctgtcaggggctc  
1-4tRNA-Ala(tgc)[18009,18081]  
ggggaattagctcagttggtagagcgctgctttgcaagcaggatgtcag  
cgggtcagtcgctattctcca  
1-5tRNA-Asn(gtt)[18128,18201]  
ttcctcagtagctcagcggcagagccatcgactgtaatcgattggtcgt  
aggttcaaatcctacctggggagt  
1-6tRNA-Arg(tct)[161235,161309]  
tgggtcagtagctcagcggatagagcaaccgccttctaagcggttggtcg  
caggttcaaatcctgcctgacccgt

>KX349259.1 Synechococcus phage S-RIM2 isolate RW\_08\_1112, complete genome

1-1tRNA-Val(tac)[13797,13868]  
gcccgaatagctcagcggtagagcacctcgttacaccgagattgtcggc  
ggttcgatcccgtcttcgggca  
1-2tRNA-Leu(taa)[17794,17880]  
tgggagtagtcggaatcggtagacgcaccagactaaaattgttgagg  
gttaacctcgtgagagttcaagtctctactcctat  
1-3tRNA-Thr(tgt)[17937,18009]  
gccccgtagctcagtggttagagcaggcctttgtaaagctcaggtcgca  
agttcaaatctgtcaggggctc  
1-4tRNA-Ala(tgc)[18012,18084]  
ggggaattagctcagttggtagagcgctgctttgcaagcaggatgtcag  
cgggtcagtcgctattctcca  
1-5tRNA-Asn(gtt)[18131,18204]  
ttcctcagtagctcagcggcagagccatcgactgtaatcgattggtcgt  
aggttcaaatcctacctggggagt  
1-6tRNA-Arg(tct)[160080,160154]

tgggtcagtagctcagcggatagagcaaccgccttctaagcgggttggtcg  
 caggttcaaatcctgcctgacccgt  
 >KX349260.1 Synechococcus phage S-RIM2 isolate RW\_11\_0905, complete genome  
 1-1tRNA-Val(tac)[13794,13865]  
 gccccaatagctcagcggtagagcacctcgtttacaccgagattgtcggg  
 ggttcgatcccctcttcgggca  
 1-2tRNA-Leu(taa)[17791,17877]  
 tgggagtagtggcggaatcggtagacgcaccagacttaaaattgttgagg  
 gttaacctcgtgagagtcaagtctcttactcctat  
 1-3tRNA-Thr(tgt)[17934,18006]  
 gccccgtagctcagtggttagagcagggtttgtaaagctcaggtcgca  
 agttcaaatctgtcaggggctc  
 1-4tRNA-Ala(tgc)[18009,18081]  
 ggggaattagctcagttggttagagcgcctgcttgcaagcaggatgtcag  
 cgggttcgagtcgcgtattctcca  
 1-5tRNA-Asn(gtt)[18128,18201]  
 ttctcagtagctcagcggcagagccatcgactgtaatcgattggtcgt  
 aggttcaaatcctacctggggagt  
 1-6tRNA-Arg(tct)[161242,161316]  
 tgggtcagtagctcagcggatagagcaaccgccttctaagcgggttggtcg  
 caggttcaaatcctgcctgacccgt  
 >KX349261.1 Synechococcus phage S-RIM2 isolate RW\_12\_0113, complete genome  
 1-1tRNA-Val(tac)[13797,13868]  
 gccccaatagctcagcggtagagcacctcgtttacaccgagattgtcggc  
 ggttcgatcccgtcttcgggca  
 1-2tRNA-Leu(taa)[17794,17880]  
 tgggagtagtggcggaatcggtagacgcaccagacttaaaattgttgagg  
 gttaacctcgtgagagtcaagtctcttactcctat  
 1-3tRNA-Thr(tgt)[17937,18009]  
 gccccgtagctcagtggttagagcagggtttgtaaagctcaggtcgca  
 agttcaaatctgtcaggggctc  
 1-4tRNA-Ala(tgc)[18012,18084]  
 ggggaattagctcagttggttagagcgcctgcttgcaagcaggatgtcag  
 cgggttcgagtcgcgtattctcca  
 1-5tRNA-Asn(gtt)[18131,18204]  
 ttctcagtagctcagcggcagagccatcgactgtaatcgattggtcgt  
 aggttcaaatcctacctggggagt  
 1-6tRNA-Arg(tct)[160702,160776]  
 tgggtcagtagctcagcggatagagcaaccgccttctaagcgggttggtcg  
 caggttcaaatcctgcctgacccgt  
 >KX349262.1 Synechococcus phage S-RIM2 isolate RW\_12\_0709, complete genome  
 1-1tRNA-Val(tac)[13794,13865]  
 gccccaatagctcagcggtagagcacctcgtttacaccgagattgtcggg  
 ggttcgatcccctcttcgggca

1-2tRNA-Leu(taa)[17791,17877]  
tgggagtatggcggaatcggtagacgcaccagacttaaaattgttgagg  
gttaacctcgtgagagttcaagtctctactcctat  
1-3tRNA-Thr(tgt)[17934,18006]  
gccccctagctcagtggttagagcaggcctttgtaaagctcaggtcgca  
agttcaaatctgtcaggggctc  
1-4tRNA-Ala(tgc)[18009,18081]  
ggggaattagctcagttggtagagcgctgctttgcaagcaggatgtcag  
cgggtcagatccgctattctcca  
1-5tRNA-Asn(gtt)[18128,18201]  
ttctcagtagctcagcggcagagccatcgactgtaatcgattggtcgt  
aggttcaaatcctacctggggagt  
1-6tRNA-Arg(tct)[160952,161026]  
tgggtcagtagctcagcggatagagcaaccgccttctaagcggttggtcg  
caggttcaaatcctgcctgacccgt

>KX349263.1 Synechococcus phage S-RIM2 isolate RW\_14\_1112, complete genome

1-1tRNA-Val(tac)[13803,13874]  
gcccgaatagctcagcggtagagcacctcgttacaccgagattgtcggg  
ggttcgatcccctcttcgggca  
1-2tRNA-Leu(taa)[17800,17886]  
tgggagtatggcggaatcggtagacgcaccagacttaaaattgttgagg  
gttaacctcgtgagagttcaagtctctactcctat  
1-3tRNA-Thr(tgt)[17943,18015]  
gccccctagctcagtggttagagcaggcctttgtaaagctcaggtcgca  
agttcaaatctgtcaggggctc  
1-4tRNA-Ala(tgc)[18018,18090]  
ggggaattagctcagttggtagagcgctgctttgcaagcaggatgtcag  
cgggtcagatccgctattctcca  
1-5tRNA-Asn(gtt)[18137,18210]  
ttctcagtagctcagcggcagagccatcgactgtaatcgattggtcgt  
aggttcaaatcctacctggggagt  
1-6tRNA-Arg(tct)[161250,161324]  
tgggtcagtagctcagcggatagagcaaccgccttctaagcggttggtcg  
caggttcaaatcctgcctgacccgt

>KX349264.1 Synechococcus phage S-RIM2 isolate RW\_16\_0905, complete genome

1-1tRNA-Val(tac)[13794,13865]  
gcccgaatagctcagcggtagagcacctcgttacaccgagattgtcggc  
ggttcgatcccgtcttcgggca  
1-2tRNA-Leu(taa)[17792,17876]  
gggagtatggcggaatcggtagacgcaccagacttaaaattgttgaggg  
ttaacctcgtgagagttcaagtctctactccta  
1-3tRNA-Thr(tgt)[17934,18006]  
gccccctagctcagtggttagagcaggcctttgtaaagctcaggtcgca  
agttcaaatctgtcaggggctc

1-4tRNA-Ala(tgc)[18009,18081]  
ggggaattagctcagttggtagagcgcctgctttgcaagcaggatgtcag  
cggttcgagtcgcgtattctcca  
1-5tRNA-Asn(gtt)[18128,18201]  
ttctcagtagctcagcggcagagccatcgactgtaatcgattggtcgt  
aggttcaaatcctacctggggagt  
1-6tRNA-Arg(tct)[161240,161314]  
tgggtcagtagctcagcggatagagcaaccgccttctaagcggttggtcg  
caggttcaaatcctgcctgacccgt

>KX349265.1 Synechococcus phage S-RIM2 isolate RW\_17\_0113, complete genome

1-1tRNA-Val(tac)[13785,13856]  
gccgaatagctcagcggtagagcacctcgttacaccgagattgtcggc  
ggttcgatcccgtcttcgggca  
1-2tRNA-Leu(taa)[17782,17868]  
tgggagtatggcggaatcggtagacgcaccagactaaaattgttgagg  
gttaacctcgtgagagttcaagtctctactcctat  
1-3tRNA-Thr(tgt)[17925,17997]  
gccccgtagctcagtggttagagcagggtttgtaaagctcaggtcgca  
agttcaaatcttgtcaggggctc  
1-4tRNA-Ala(tgc)[18000,18072]  
ggggaattagctcagttggtagagcgcctgctttgcaagcaggatgtcag  
cggttcgagtcgcgtattctcca  
1-5tRNA-Asn(gtt)[18119,18192]  
ttctcagtagctcagcggcagagccatcgactgtaatcgattggtcgt  
aggttcaaatcctacctggggagt  
1-6tRNA-Arg(tct)[161231,161305]  
tgggtcagtagctcagcggatagagcaaccgccttctaagcggttggtcg  
caggttcaaatcctgcctgacccgt

>KX349266.1 Synechococcus phage S-RIM2 isolate RW\_26\_0905, complete genome

1-1tRNA-Val(tac)[13794,13865]  
gccgaatagctcagcggtagagcacctcgttacaccgagattgtcggg  
ggttcgatcccgtcttcgggca  
1-2tRNA-Leu(taa)[17792,17876]  
gggagtatggcggaatcggtagacgcaccagactaaaattgttgaggg  
ttaacctcgtgagagttcaagtctctactccta  
1-3tRNA-Thr(tgt)[17934,18006]  
gccccgtagctcagtggttagagcagggtttgtaaagctcaggtcgca  
agttcaaatcttgtcaggggctc  
1-4tRNA-Ala(tgc)[18009,18081]  
ggggaattagctcagttggtagagcgcctgctttgcaagcaggatgtcag  
cggttcgagtcgcgtattctcca  
1-5tRNA-Asn(gtt)[18128,18201]  
ttctcagtagctcagcggcagagccatcgactgtaatcgattggtcgt  
aggttcaaatcctacctggggagt

1-6tRNA-Arg(tct)[160078,160152]  
 tgggtcagtagctcagcgtagagcaaccgccttctaagcgggtggtcg  
 caggttcaaatcctgcctgacccgt

>KX349267.1 Synechococcus phage S-RIM2 isolate RW\_29\_1112, complete genome

1-1tRNA-Val(tac)[13797,13868]  
 gcccgaaatagctcagcgtagagcacctcgttacaccgagattgtcggg  
 ggttcgatcccctcttcgggca

1-2tRNA-Leu(taa)[17795,17879]  
 gggagtatggcggaatcggtagacgcaccagacttaaaattgttgagg  
 ttaacctcgtgagagttcaagtctcttactccta

1-3tRNA-Thr(tgt)[17937,18009]  
 gccccctagctcagtggttagagcaggcctttgtaaagctcaggtcgca  
 agttcaaatctgtcaggggctc

1-4tRNA-Ala(tgc)[18012,18084]  
 ggggaattagctcagttggttagagcgctgctttgcaagcaggatgtcag  
 cgggtcagagtcgctatttcca

1-5tRNA-Asn(gtt)[18131,18204]  
 ttctcagtagctcagcgagagccatcgactgttaatcgattggtcgt  
 aggttcaaatcctacctggggagt

1-6tRNA-Arg(tct)[161241,161315]  
 tgggtcagtagctcagcgtagagcaaccgccttctaagcgggtggtcg  
 caggttcaaatcctgcctgacccgt

>KX349268.1 Synechococcus phage S-RIM2 isolate RW\_30\_0905, complete genome

1-1tRNA-Val(tac)[13797,13868]  
 gcccgaaatagctcagcgtagagcacctcgttacaccgagattgtcggg  
 ggttcgatcccgtcttcgggca

1-2tRNA-Leu(taa)[17794,17880]  
 tgggagtatggcggaatcggtagacgcaccagacttaaaattgttgagg  
 gttaacctcgtgagagttcaagtctcttactcctat

1-3tRNA-Thr(tgt)[17937,18009]  
 gccccctagctcagtggttagagcaggcctttgtaaagctcaggtcgca  
 agttcaaatctgtcaggggctc

1-4tRNA-Ala(tgc)[18012,18084]  
 ggggaattagctcagttggttagagcgctgctttgcaagcaggatgtcag  
 cgggtcagagtcgctatttcca

1-5tRNA-Asn(gtt)[18131,18204]  
 ttctcagtagctcagcgagagccatcgactgttaatcgattggtcgt  
 aggttcaaatcctacctggggagt

1-6tRNA-Arg(tct)[161243,161317]  
 tgggtcagtagctcagcgtagagcaaccgccttctaagcgggtggtcg  
 caggttcaaatcctgcctgacccgt

>KX349269.1 Synechococcus phage S-RIM2 isolate RW\_34\_0905, complete genome

1-1tRNA-Val(tac)[13796,13867]  
 gcccgaaatagctcagcgtagagcacctcgttacaccgagattgtcggc

ggttcgatcccgctcttcgggca  
1-2tRNA-Leu(taa)[17793,17879]  
tgggagtatggcgaatcggtagacgcaccagacttaaaattgttgagg  
gttaacctcgtgagagttcaagtctctactcctat  
1-3tRNA-Thr(tgt)[17936,18008]  
gccccctagctcagtggttagagcagggtttgtaaagctcaggtcgca  
agttcaaatctgtcaggggctc  
1-4tRNA-Ala(tgc)[18011,18083]  
ggggaattagctcagttggtagagcgctgtttgcaagcaggatgtcag  
cgggttcgagtcgcgtattctcca  
1-5tRNA-Asn(gtt)[18130,18203]  
ttctcagtagctcagcggcagagccatcgactgttaatcgattggtcgt  
aggttcaaatcctacctggggagt  
1-6tRNA-Arg(tct)[161241,161315]  
tgggtcagtagctcagcggatagagcaaccgccttctaagcgggttggtcg  
caggttcaaatcctgcctgacctgt

>KX349270.1 Synechococcus phage S-RIM2 isolate RW\_40\_1112, complete genome

1-1tRNA-Val(tac)[13797,13868]  
gcccgaatagctcagcggtagagcacctcgtttacaccgagattgtcggc  
ggttcgatcccgctcttcgggca  
1-2tRNA-Leu(taa)[17794,17880]  
tgggagtatggcgaatcggtagacgcaccagacttaaaattgttgagg  
gttaacctcgtgagagttcaagtctctactcctat  
1-3tRNA-Thr(tgt)[17937,18009]  
gccccctagctcagtggttagagcagggtttgtaaagctcaggtcgca  
agttcaaatctgtcaggggctc  
1-4tRNA-Ala(tgc)[18012,18084]  
ggggaattagctcagttggtagagcgctgtttgcaagcaggatgtcag  
cgggttcgagtcgcgtattctcca  
1-5tRNA-Asn(gtt)[18131,18204]  
ttctcagtagctcagcggcagagccatcgactgttaatcgattggtcgt  
aggttcaaatcctacctggggagt  
1-6tRNA-Arg(tct)[161243,161317]  
tgggtcagtagctcagcggatagagcaaccgccttctaagcgggttggtcg  
caggttcaaatcctgcctgacctgt

>KX349271.1 Synechococcus phage S-RIM2 isolate Sn\_25\_0709, complete genome

1-1tRNA-Val(tac)[13800,13871]  
gcccgaatagctcagcggtagagcacctcgtttacaccgagattgtcggc  
ggttcgatcccgctcttcgggca  
1-2tRNA-Leu(taa)[17797,17883]  
tgggagtatggcgaatcggtagacgcaccagacttaaaattgttgagg  
gttaacctcgtgagagttcaagtctctactcctat  
1-3tRNA-Thr(tgt)[17940,18012]  
gccccctagctcagtggttagagcagggtttgtaaagctcaggtcgca

agttcaaatctgtcaggggctc  
1-4tRNA-Ala(tgc)[18015,18087]  
ggggaattagctcagttggtagagcgctgcttgcaagcaggatgtcag  
cgggtcagatccgctattctcca  
1-5tRNA-Asn(gtt)[18134,18207]  
ttcctcagtagctcagcggcagagccatcgactgtaatcgattggtcgt  
aggttcaaatcctacctggggagt  
1-6tRNA-Arg(tct)[161246,161320]  
tgggtcagtagctcagcggatagagcaaccgccttctaagcggttggtcg  
caggttcaaatcctgcctgacccgt

>KX349272.1 Synechococcus phage S-RIM2 isolate W1\_01\_0709, complete genome

1-1tRNA-Val(tac)[13794,13865]  
gcccgaatagctcagcggtagagcacctcgtttacaccgagattgtcggc  
ggttcgatcccgctcttcgggca  
1-2tRNA-Leu(taa)[17791,17877]  
tgggagtagtgccggaatcggtagacgcaccagacttaaaattgttgagg  
gttaacctcgtgagagttcaagtcctctactcctat  
1-3tRNA-Thr(tgt)[17934,18006]  
gccccctagctcagtggttagagcaggcctttgttaaagctcaggtcgca  
agttcaaatctgtcaggggctc  
1-4tRNA-Ala(tgc)[18009,18081]  
ggggaattatctcagttggtagagcgctgcttgcaagcaggatgtcag  
cgggtcagatccgctattctcca  
1-5tRNA-Asn(gtt)[18128,18201]  
ttcctcagtagctcagcggcagagccatcgactgtaatcgattggtcgt  
aggttcaaatcctacctggggagt  
1-6tRNA-Arg(tct)[161238,161312]  
tgggtcagtagctcagcggatagagcaaccgccttctaagcggttggtcg  
caggttcaaatcctgcctgacccgt

>KX349273.1 Synechococcus phage S-RIM2 isolate W1\_01\_0910, complete genome

1-1tRNA-Val(tac)[13895,13966]  
gcccgaatagctcagcggtagagcacctcgtttacaccgagattgtcggc  
ggttcgatcccgctcttcgggca  
1-2tRNA-Leu(taa)[17892,17978]  
tgggagtagtgccggaatcggtagacgcaccagacttaaaattgttgagg  
gttaacctcgtgagagttcaagtcctctactcctat  
1-3tRNA-Thr(tgt)[18035,18108]  
gccccctagctcagtggttagagcaggcctttgttaaagctcaggtcgca  
agttcaaatctgtcaggggctcc  
1-4tRNA-Ala(tgc)[18110,18185]  
tggggaattagctcagtcgtggtagagcgctgcttgcaagcaggatgtc  
agcggttcagatccgctattctccat  
1-5tRNA-Asn(gtt)[18231,18304]  
ttcctcagtagctcagcggcagagctatcgactgtaatcgattggtcgt

aggttcaaatcctacctggggagt  
1-6tRNA-Arg(tct)[161117,161191]  
tgggtcagtagctcagcggatagagcaaccgccttctaagcggttggtcg  
caggttcaaatcctgcctgacccgt

>KX349274.1 Synechococcus phage S-RIM2 isolate W1\_03\_0709, complete genome

1-1tRNA-Val(tac)[13895,13966]  
gcccgaatagctcagcggtagagcacctcgttacaccgagattgtcggc  
ggttcgatcccgtcttcgggca  
1-2tRNA-Leu(taa)[17892,17978]  
tgggagtatggcgaatcggtagacgcaccagactaaaattgttgagg  
gttaacctcgtgagagttcaagtcctctactcctat  
1-3tRNA-Thr(tgt)[18035,18107]  
gccccgtagctcagtggtagagcaggcctttgtaaagctcaggtcgca  
agttcaaatcttgcaggggctc  
1-4tRNA-Ala(tgc)[18453,18526]  
ggggaattagctcagtcgtgtagagcgctgcttgaagcaggatgtca  
gcggttcgagtcgctattctcca  
1-5tRNA-Asn(gtt)[18573,18646]  
ttcctcagtagctcagcggcagagctatcgactgttaatcgattggtcgt  
aggttcaaatcctacctggggagt  
1-6tRNA-Arg(tct)[161455,161529]  
tgggtcagtagctcagcggatagagcaaccgccttctaagcggttggtcg  
caggttcaaatcctgcctgacccgt

>KX349275.1 Synechococcus phage S-RIM2 isolate W1\_08\_0709, complete genome

1-1tRNA-Val(tac)[13895,13966]  
gcccgaatagctcagcggtagagcacctcgttacaccgagattgtcggc  
ggttcgatcccgtcttcgggca  
1-2tRNA-Leu(taa)[17892,17978]  
tgggagtatggcgaatcggtagacgcaccagactaaaattgttgagg  
gttaacctcgtgagagttcaagtcctctactcctat  
1-3tRNA-Thr(tgt)[18035,18108]  
gccccgtagctcagtggtagagcaggcctttgtaaagctcaggtcgca  
agttcaaatcttgcaggggctcc  
1-4tRNA-Ala(tgc)[18110,18184]  
tggggaattagctcagttggtagagcgctgcttgaagcaggatgtca  
gcggttcgagtcgctattctccat  
1-5tRNA-Asn(gtt)[18230,18303]  
ttcctcagtagctcagcggcagagctatcgactgttaatcgattggtcgt  
aggttcaaatcctacctggggagt  
1-6tRNA-Arg(tct)[161068,161142]  
tgggtcagtagctcagcggatagagcaaccgccttctaagcggttggtcg  
caggttcaaatcctgcctgacccgt

>KX349276.1 Synechococcus phage S-RIM2 isolate W1\_09\_0709, complete genome

1-1tRNA-Val(tac)[13794,13865]



gcccgaatagctcagcggtagagcacctcgtttacaccgagattgtcggc  
ggttcgatcccgctcttcgggca  
1-2tRNA-Leu(taa)[17791,17877]  
tgggagtatggcgaatcggtagacgcaccagactaaaattgttgagg  
gttaacctcgtgagagttcaagtctctactcctat  
1-3tRNA-Thr(tgt)[17934,18006]  
gccccctagctcagtggttagagcagggtttgtaaagctcaggtcgca  
agttcaaatctgtcaggggctc  
1-4tRNA-Ala(tgc)[18009,18081]  
ggggaattagctcagttggttagagcgctgctttgcaagcaggatgtcag  
cggttcgagtcgctattctcca  
1-5tRNA-Asn(gtt)[18128,18201]  
ttcctcagtagctcagcggcagagccatcgactgtaatcgattggtcgt  
aggttcaaatcctacctggggagt  
1-6tRNA-Arg(tct)[161239,161313]  
tgggtcagtagctcagcggatagagcaaccgccttctaagcggttggtcg  
caggttcaaatcctgcctgacccgt

>KX349277.1 Synechococcus phage S-RIM2 isolate W1\_12\_0909, complete genome

1-1tRNA-Val(tac)[13895,13966]  
gcccgaatagctcagcggtagagcacctcgtttacaccgagattgtcggc  
ggttcgatcccgctcttcgggca  
1-2tRNA-Leu(taa)[17892,17978]  
tgggagtatggcgaatcggtagacgcaccagactaaaattgttgagg  
gttaacctcgtgagagttcaagtctctactcctat  
1-3tRNA-Thr(tgt)[18035,18108]  
gccccctagctcagtggttagagcagggtttgtaaagctcaggtcgca  
agttcaaatctgtcaggggctcc  
1-4tRNA-Ala(tgc)[18110,18184]  
tggggaattagctcagttggttagagcgctgctttgcaagcaggatgtca  
gcggttcgagtcgctattctccat  
1-5tRNA-Asn(gtt)[18230,18303]  
ttcctcagtagctcagcggcagagctatcgactgtaatcgattggtcgt  
aggttcaaatcctacctggggagt  
1-6tRNA-Arg(tct)[161116,161190]  
tgggtcagtagctcagcggatagagcaaccgccttctaagcggttggtcg  
caggttcaaatcctgcctgacccgt

>KX349278.1 Synechococcus phage S-RIM2 isolate W1\_13\_0709, complete genome

1-1tRNA-Val(tac)[13895,13966]  
gcccgaatagctcagcggtagagcacctcgtttacaccgagattgtcggc  
ggttcgatcccgctcttcgggca  
1-2tRNA-Leu(taa)[17892,17978]  
tgggagtatggcgaatcggtagacgcaccagactaaaattgttgagg  
gttaacctcgtgagagttcaagtctctactcctat  
1-3tRNA-Thr(tgt)[18035,18108]

gccccctagctcagtggtagagcaggcctttgtaaagctcaggctcgca  
agttcaaatcttgcaggggctcc  
1-4tRNA-Ala(tgc)[18110,18184]  
tggggaattagctcagtggtagagcgctgctttgcaagcaggatgtca  
gcggttcgagtcgctattctccat  
1-5tRNA-Asn(gtt)[18230,18303]  
ttctcagtagctcagcggcagagctatcgactgttaatcgattggcgt  
aggttcaaatcctacctggggagt  
1-6tRNA-Arg(tct)[161119,161193]  
tgggtcagtagctcagcggatagagcaaccgccttctaagcggttggtcg  
caggttcaaatcctgcctgaccgt

>KX349279.1 Synechococcus phage S-RIM2 isolate W1\_16\_0709, complete genome

1-1tRNA-Val(tac)[13797,13868]  
gcccgaatagctcagcggtagagcacctcgtttacaccgagattgtcggc  
ggttcgatcccgctcttcgggca  
1-2tRNA-Leu(taa)[17794,17880]  
tgggagataggcgaatcggtagacgcaccagacttaaaattgttgagg  
gttaacctcgtgagagttcaagtctctactcctat  
1-3tRNA-Thr(tgt)[17937,18009]  
gccccctagctcagtggtagagcaggcctttgtaaagctcaggctcgca  
agttcaaatcttgcaggggctc  
1-4tRNA-Ala(tgc)[18012,18084]  
ggggaattagctcagtggtagagcgctgctttgcaagcaggatgtcag  
cgggttcgagtcgctattctcca  
1-5tRNA-Asn(gtt)[18131,18204]  
ttctcagtagctcagcggcagagccatcgactgttaatcgattggcgt  
aggttcaaatcctacctggggagt  
1-6tRNA-Arg(tct)[161243,161317]  
tgggtcagtagctcagcggatagagcaaccgccttctaagcggttggtcg  
caggttcaaatcctgcctgaccgt

>KX349280.1 Synechococcus phage S-RIM2 isolate W2\_02\_0709, complete genome

1-1tRNA-Val(tac)[13895,13966]  
gcccgaatagctcagcggtagagcacctcgtttacaccgagattgtcggc  
ggttcgatcccgctcttcgggca  
1-2tRNA-Leu(taa)[17892,17978]  
tgggagataggcgaatcggtagacgcaccagacttaaaattgttgagg  
gttaacctcgtgagagttcaagtctctactcctat  
1-3tRNA-Thr(tgt)[18035,18108]  
gccccctagctcagtggtagagcaggcctttgtaaagctcaggctcgca  
agttcaaatcttgcaggggctcc  
1-4tRNA-Ala(tgc)[18110,18184]  
tggggaattagctcagtggtagagcgctgctttgcaagcaggatgtca  
gcggttcgagtcgctattctccat  
1-5tRNA-Asn(gtt)[18230,18303]

ttcctcagtagctcagcggcagagctatcgactgttaatcgattggcgt  
aggttcaaactctacctggggagt  
1-6tRNA-Arg(tct)[161114,161188]  
tgggtcagtagctcagcggatagagcaaccgccttctaagcgggtggtcg  
caggttcaaactctgcctgacccgt

>KX349281.1 Synechococcus phage S-RIM2 isolate W2\_13\_0910, complete genome

1-1tRNA-Val(tac)[13794,13865]  
gcccgaatagctcagcggtagagcacctcgttacaccgagattgtcggc  
ggttcgatcccgctcttcgggca  
1-2tRNA-Leu(taa)[17791,17877]  
tgggagtagtggcggaatcggtagacgcaccagacttaaaattgttgagg  
gttaacctcgtgagagttcaagtctctactcctat  
1-3tRNA-Thr(tgt)[17934,18006]  
gccccctagctcagtggttagagcagggtttgttaaagctcaggtcgca  
agttcaaactctgtcaggggctc  
1-4tRNA-Ala(tgc)[18009,18081]  
ggggaattagctcagttggtagagcgctgctttgcaagcaggatgtcag  
cgggtcgagtcgctattctcca  
1-5tRNA-Asn(gtt)[18128,18201]  
ttcctcagtagctcagcggcagagccatcgactgttaatcgattggcgt  
aggttcaaactctacctggggagt  
1-6tRNA-Arg(tct)[161246,161320]  
tgggtcagtagctcagcggatagagcaaccgccttctaagcgggtggtcg  
caggttcaaactctgcctgacccgt

>KX349282.1 Synechococcus phage S-RIM2 isolate W2\_14\_0910, complete genome

1-1tRNA-Val(tac)[13803,13874]  
gcccgaatagctcagcggtagagcacctcgttacaccgagattgtcggc  
ggttcgatcccgctcttcgggca  
1-2tRNA-Leu(taa)[17801,17885]  
gggagtagtggcggaatcggtagacgcaccagacttaaaattgttgagg  
ttaacctcgtgagagttcaagtctctactccta  
1-3tRNA-Thr(tgt)[17943,18015]  
gccccctagctcagtggttagagcagggtttgttaaagctcaggtcgca  
agttcaaactctgtcaggggctc  
1-4tRNA-Ala(tgc)[18018,18090]  
ggggaattagctcagttggtagagcgctgctttgcaagcaggatgtcag  
cgggtcgagtcgctattctcca  
1-5tRNA-Asn(gtt)[18137,18210]  
ttcctcagtagctcagcggcagagccatcgactgttaatcgattggcgt  
aggttcaaactctacctggggagt  
1-6tRNA-Arg(tct)[161255,161329]  
tgggtcagtagctcagcggatagagcaaccgccttctaagcgggtggtcg  
caggttcaaactctgcctgacccgt

>KX349283.1 Synechococcus phage S-RIM2 isolate W2\_32\_0910, complete genome

1-tRNA-Val(tac)[13883,13954]  
gcccgaatagctcagcggtagacacctcgtttacaccgagattgtcggc  
ggttcgatcccgtcttcgggca  
1-2tRNA-Leu(taa)[17880,17966]  
tgggagatggcggaatcggtagacgcaccagactaaaattgttgagg  
gttaacctcgtgagagttcaagtctctactcctat  
1-3tRNA-Thr(tgt)[18023,18096]  
gccccctagctcagtggtagagcaggcctttgtaaagctcaggtcgca  
agttcaaatctgtcaggggctcc  
1-4tRNA-Ala(tgc)[18098,18172]  
tggggaattagctcagttggtagagcgctgctttgcaagcaggatgtca  
gcggttcgagtcgctattctccat  
1-5tRNA-Asn(gtt)[18218,18291]  
ttcctcagtagctcagcggcagagctatcgactgttaatcgattggtcgt  
aggttcaaatcctacctggggagt  
1-6tRNA-Arg(tct)[161054,161128]  
tgggtcagtagctcagcggtagagcaaccgccttctaagcggttggtcg  
caggttcaaatcctgcctgacctgt

>KX349284.1 Synechococcus phage S-RIM2 isolate W2\_39\_0910, complete genome

1-tRNA-Val(tac)[13904,13975]  
gcccgaatagctcagcggtagacacctcgtttacaccgagattgtcggc  
ggttcgatcccgtcttcgggca  
1-2tRNA-Leu(taa)[17901,17987]  
tgggagatggcggaatcggtagacgcaccagactaaaattgttgagg  
gttaacctcgtgagagttcaagtctctactcctat  
1-3tRNA-Thr(tgt)[18044,18117]  
gccccctagctcagtggtagagcaggcctttgtaaagctcaggtcgca  
agttcaaatctgtcaggggctcc  
1-4tRNA-Ala(tgc)[18119,18194]  
tggggaattagctcagttggtagagcgctgctttgcaagcaggatgtc  
agcgggttcgagtcgctattctccat  
1-5tRNA-Asn(gtt)[18240,18313]  
ttcctcagtagctcagcggcagagctatcgactgttaatcgattggtcgt  
aggttcaaatcctacctggggagt  
1-6tRNA-Arg(tct)[161141,161215]  
tgggtcagtagctcagcggtagagcaaccgccttctaagcggttggtcg  
caggttcaaatcctgcctgacctgt

>KJ019031.1 Synechococcus phage ACG-2014d isolate Syn7803C48, complete genome

1-tRNA-Val(tac)[13618,13691]  
tgggtgattaactcagtggtagagtactgctttacacgcagtaggtcac  
tggttcaaatccagtattacccat  
1-2tRNA-Arg(tct)[153722,153796]  
tgggcaagtagctcagtggtagagcatcgacttctaatacggttggtcg  
ggggttcaaatccctccttgcccgt

1-3tRNA-Asn(gtt)[153817,153890]  
 ttccaagtagctcagtgccagagccgccgactgttaatcggctggtcgc  
 tgggtcaaatccagccttgggagt

>KJ019035.1 Synechococcus phage ACG-2014d isolate Syn7803C55, complete genome  
 1-1tRNA-Val(tac)[11908,11981]  
 tgggtgattaactcagtggttagagtactgctttacacgcagtaggtcac  
 tgggtcaaatccagtattacccat  
 1-2tRNA-Arg(tct)[152060,152134]  
 tgggcaagtagctcagtggttagagcatcgacttctaatacgcttggtcg  
 ggggttcaaatccctccttggccgt  
 1-3tRNA-Asn(gtt)[152155,152228]  
 ttccaagtagctcagtgccagagccgccgactgttaatcggctggtcgc  
 tgggtcaaatccagccttgggagt

>KJ019036.1 Synechococcus phage ACG-2014d isolate Syn7803C57, complete genome  
 1-1tRNA-Val(tac)[13612,13685]  
 tgggtgattaactcagtggttagagtactgctttacacgcagtaggtcac  
 tgggtcaaatccagtattacccat  
 1-2tRNA-Arg(tct)[153716,153790]  
 tgggcaagtagctcagtggttagagcatcgacttctaatacgcttggtcg  
 ggggttcaaatccctccttggccgt  
 1-3tRNA-Asn(gtt)[153811,153884]  
 ttccaagtagctcagtgccagagccgccgactgttaatcggctggtcgc  
 tgggtcaaatccagccttgggagt

>KJ019047.1 Synechococcus phage ACG-2014d isolate Syn7803C73, complete genome  
 1-1tRNA-Val(tac)[13618,13691]  
 tgggtgattaactcagtggttagagtactgctttacacgcagtaggtcac  
 tgggtcaaatccagtattacccat  
 1-2tRNA-Arg(tct)[153722,153796]  
 tgggcaagtagctcagtggttagagcatcgacttctaatacgcttggtcg  
 ggggttcaaatccctccttggccgt  
 1-3tRNA-Asn(gtt)[153817,153890]  
 ttccaagtagctcagtgccagagccgccgactgttaatcggctggtcgc  
 tgggtcaaatccagccttgggagt

>KJ019048.1 Synechococcus phage ACG-2014d isolate Syn7803C75, complete genome  
 1-1tRNA-Val(tac)[13618,13691]  
 tgggtgattaactcagtggttagagtactgctttacacgcagtaggtcac  
 tgggtcaaatccagtattacccat  
 1-2tRNA-Arg(tct)[153484,153558]  
 tgggcaagtagctcagtggttagagcatcgacttctaatacgcttggtcg  
 ggggttcaaatccctccttggccgt  
 1-3tRNA-Asn(gtt)[153579,153652]  
 ttccaagtagctcagtgccagagccgccgactgttaatcggctggtcgc  
 tgggtcaaatccagccttgggagt

>KJ019062.1 Synechococcus phage ACG-2014d isolate Syn7803C93, complete genome

1-tRNA-Val(tac)[13621,13694]  
tgggtgattaactcagtggttagagtgactgctttacacgcagtaggtcac  
tgggtcaaatccagtattacccat  
1-2tRNA-Arg(tct)[153722,153796]  
tgggcaagtagctcagtggttagagcatcgacttctaatacgcttggtcgcg  
ggggttcaaatccctccttgcctcgt  
1-3tRNA-Asn(gtt)[153817,153890]  
ttccaagtagctcagtggttagagccgccgactgttaatcggtggtcgc  
tgggtcaaatccagccttgggagt

>KJ019072.1 *Synechococcus* phage ACG-2014d isolate Syn7803US108, complete genome

1-tRNA-Val(tac)[13618,13691]  
tgggtgattaactcagtggttagagtgactgctttacacgcagtaggtcac  
tgggtcaaatccagtattacccat  
1-2tRNA-Arg(tct)[153723,153797]  
tgggcaagtagctcagtggttagagcatcgacttctaatacgcttggtcgcg  
ggggttcaaatccctccttgcctcgt  
1-3tRNA-Asn(gtt)[153818,153891]  
ttccaagtagctcagtggttagagccgccgactgttaatcggtggtcgc  
tgggtcaaatccagccttgggagt

>KJ019073.1 *Synechococcus* phage ACG-2014d isolate Syn7803US109, complete genome

1-tRNA-Val(tac)[13621,13694]  
tgggtgattaactcagtggttagagtgactgctttacacgcagtaggtcac  
tgggtcaaatccagtattacccat  
1-2tRNA-Arg(tct)[153731,153805]  
tgggcaagtagctcagtggttagagcatcgacttctaatacgcttggtcgcg  
ggggttcaaatccctccttgcctcgt  
1-3tRNA-Asn(gtt)[153826,153899]  
ttccaagtagctcagtggttagagccgccgactgttaatcggtggtcgc  
tgggtcaaatccagccttgggagt

>KJ019075.1 *Synechococcus* phage ACG-2014d isolate Syn7803US111, complete genome

1-tRNA-Val(tac)[13618,13691]  
tgggtgattaactcagtggttagagtgactgctttacacgcagtaggtcac  
tgggtcaaatccagtattacccat  
1-2tRNA-Arg(tct)[153715,153789]  
tgggcaagtagctcagtggttagagcatcgacttctaatacgcttggtcgcg  
ggggttcaaatccctccttgcctcgt  
1-3tRNA-Asn(gtt)[153810,153883]  
ttccaagtagctcagtggttagagccgccgactgttaatcggtggtcgc  
tgggtcaaatccagccttgggagt

>KJ019078.1 *Synechococcus* phage ACG-2014d isolate Syn7803US114, complete genome

1-tRNA-Val(tac)[13618,13691]  
tgggtgattaactcagtggttagagtgactgctttacacgcagtaggtcac  
tgggtcaaatccagtattacccat  
1-2tRNA-Arg(tct)[153718,153792]

tgggcaagtagctcagtggtatagagcatcgacttctaatacggttggtcg  
 ggggttcaaatccctccttccccgt  
 1–3tRNA–Asn(gtt)[153813,153886]  
 ttccaagtagctcagtggtcagagccgccgactgttaatcggctggtcgc  
 tggttcaaatccagccttgggagt  
 >KJ019079.1 Synechococcus phage ACG–2014d isolate Syn7803US115, complete genome  
 1–1tRNA–Val(tac)[13618,13691]  
 tgggtgattaactcagtggttagagtgactgctttacacgcagtaggtcac  
 tggttcaaatccagttattacccat  
 1–2tRNA–Arg(tct)[153722,153796]  
 tgggcaagtagctcagtggtatagagcatcgacttctaatacggttggtcg  
 ggggttcaaatccctccttccccgt  
 1–3tRNA–Asn(gtt)[153817,153890]  
 ttccaagtagctcagtggtcagagccgccgactgttaatcggctggtcgc  
 tggttcaaatccagccttgggagt  
 >KJ019112.1 Synechococcus phage ACG–2014d isolate Syn7803US59, complete genome  
 1–1tRNA–Val(tac)[13618,13691]  
 tgggtgattaactcagtggttagagtgactgctttacacgcagtaggtcac  
 tggttcaaatccagttattacccat  
 1–2tRNA–Arg(tct)[153722,153796]  
 tgggcaagtagctcagtggtatagagcatcgacttctaatacggttggtcg  
 ggggttcaaatccctccttccccgt  
 1–3tRNA–Asn(gtt)[153817,153890]  
 ttccaagtagctcagtggtcagagccgccgactgttaatcggctggtcgc  
 tggttcaaatccagccttgggagt  
 >KJ019113.1 Synechococcus phage ACG–2014d isolate Syn7803US5, complete genome  
 1–1tRNA–Val(tac)[13624,13697]  
 tgggtgattaactcagtggttagagtgactgctttacacgcagtaggtcac  
 tggttcaaatccagttattacccat  
 1–2tRNA–Arg(tct)[153868,153942]  
 tgggcaagtagctcagtggtatagagcatcgacttctaatacggttggtcg  
 ggggttcaaatccctccttccccgt  
 1–3tRNA–Asn(gtt)[153963,154036]  
 ttccaagtagctcagtggtcagagccgccgactgttaatcggctggtcgc  
 tggttcaaatccagccttgggagt  
 >KJ019115.1 Synechococcus phage ACG–2014d isolate Syn7803US61, complete genome  
 1–1tRNA–Val(tac)[13627,13700]  
 tgggtgattaactcagtggttagagtgactgctttacacgcagtaggtcac  
 tggttcaaatccagttattacccat  
 1–2tRNA–Arg(tct)[153652,153726]  
 tgggcaagtagctcagtggtatagagcatcgacttctaatacggttggtcg  
 ggggttcaaatccctccttccccgt  
 1–3tRNA–Asn(gtt)[153747,153820]  
 ttccaagtagctcagtggtcagagccgccgactgttaatcggctggtcgc

tggttcaaatccagccttgggagt  
 >KJ019117.1 Synechococcus phage ACG–2014d isolate Syn7803US63, complete genome  
 1–1tRNA–Val(tac)[13603,13676]  
 tgggtgattaactcagtggttagagtgactgctttacacgcagtaggtcac  
 tggttcaaatccagtattacccat  
 1–2tRNA–Arg(tct)[153769,153843]  
 tgggcaagtagctcagtggttagagcatcgacttctaatacgcttggtcgc  
 ggggttcaaatccctccttgcctcgt  
 1–3tRNA–Asn(gtt)[153864,153937]  
 ttccaagtagctcagtggttagagccgactgttaatcggtggtcgc  
 tggttcaaatccagccttgggagt  
 >KJ019119.1 Synechococcus phage ACG–2014d isolate Syn7803US65, complete genome  
 1–1tRNA–Val(tac)[13624,13697]  
 tgggtgattaactcagtggttagagtgactgctttacacgcagtaggtcac  
 tggttcaaatccagtattacccat  
 1–2tRNA–Arg(tct)[153777,153851]  
 tgggcaagtagctcagtggttagagcatcgacttctaatacgcttggtcgc  
 ggggttcaaatccctccttgcctcgt  
 1–3tRNA–Asn(gtt)[153872,153945]  
 ttccaagtagctcagtggttagagccgactgttaatcggtggtcgc  
 tggttcaaatccagccttgggagt  
 >KJ019120.1 Synechococcus phage ACG–2014d isolate Syn7803US71, complete genome  
 1–1tRNA–Val(tac)[13621,13694]  
 tgggtgattaactcagtggttagagtgactgctttacacgcagtaggtcac  
 tggttcaaatccagtattacccat  
 1–2tRNA–Arg(tct)[153744,153818]  
 tgggcaagtagctcagtggttagagcatcgacttctaatacgcttggtcgc  
 ggggttcaaatccctccttgcctcgt  
 1–3tRNA–Asn(gtt)[153839,153912]  
 ttccaagtagctcagtggttagagccgactgttaatcggtggtcgc  
 tggttcaaatccagccttgggagt  
 >KJ019125.1 Synechococcus phage ACG–2014d isolate Syn7803US82, complete genome  
 1–1tRNA–Val(tac)[13621,13694]  
 tgggtgattaactcagtggttagagtgactgctttacacgcagtaggtcac  
 tggttcaaatccagtattacccat  
 1–2tRNA–Arg(tct)[153820,153894]  
 tgggcaagtagctcagtggttagagcatcgacttctaatacgcttggtcgc  
 ggggttcaaatccctccttgcctcgt  
 1–3tRNA–Asn(gtt)[153915,153988]  
 ttccaagtagctcagtggttagagccgactgttaatcggtggtcgc  
 tggttcaaatccagccttgggagt  
 >KJ019127.1 Synechococcus phage ACG–2014d isolate Syn7803US85, complete genome  
 1–1tRNA–Val(tac)[13624,13697]  
 tgggtgattaactcagtggttagagtgactgctttacacgcagtaggtcac



tggttcaaatccagtattacccat  
1-2tRNA-Arg(tct)[153708,153782]  
tgggcaagtagctcagtgatagagcatcgacttctaatacggttggtcg  
ggggttcaaatccctccttccccgt  
1-3tRNA-Asn(gtt)[153803,153876]  
ttccaagtagctcagtgagagccgccgactgttaatcggttggtcgc  
tggttcaaatccagccttgggagt

>KJ019129.1 Synechococcus phage ACG-2014d isolate Syn7803US89, complete genome

1-1tRNA-Val(tac)[13621,13694]  
tgggtgattaactcagtggtagagtactgctttacacgcagtaggtcac  
tggttcaaatccagtattacccat  
1-2tRNA-Arg(tct)[153753,153827]  
tgggcaagtagctcagtgatagagcatcgacttctaatacggttggtcg  
ggggttcaaatccctccttccccgt  
1-3tRNA-Asn(gtt)[153848,153921]  
ttccaagtagctcagtgagagccgccgactgttaatcggttggtcgc  
tggttcaaatccagccttgggagt

>KJ019130.1 Synechococcus phage ACG-2014d isolate Syn7803US94, complete genome

1-1tRNA-Val(tac)[13622,13695]  
tgggtgattaactcagtggtagagtactgctttacacgcagtaggtcac  
tggttcaaatccagtattacccat  
1-2tRNA-Arg(tct)[153821,153895]  
tgggcaagtagctcagtgatagagcatcgacttctaatacggttggtcg  
ggggttcaaatccctccttccccgt  
1-3tRNA-Asn(gtt)[153916,153989]  
ttccaagtagctcagtgagagccgccgactgttaatcggttggtcgc  
tggttcaaatccagccttgggagt

>KJ019139.1 Synechococcus phage ACG-2014d isolate Syn7803C108, complete genome

1-1tRNA-Val(tac)[13618,13691]  
tgggtgattaactcagtggtagagtactgctttacacgcagtaggtcac  
tggttcaaatccagtattacccat  
1-2tRNA-Arg(tct)[153817,153891]  
tgggcaagtagctcagtgatagagcatcgacttctaatacggttggtcg  
ggggttcaaatccctccttccccgt  
1-3tRNA-Asn(gtt)[153912,153985]  
ttccaagtagctcagtgagagccgccgactgttaatcggttggtcgc  
tggttcaaatccagccttgggagt

>KJ019160.1 Synechococcus phage ACG-2014d isolate Syn7803C35, complete genome

1-1tRNA-Val(tac)[13621,13694]  
tgggtgattaactcagtggtagagtactgctttacacgcagtaggtcac  
tggttcaaatccagtattacccat  
1-2tRNA-Arg(tct)[153821,153895]  
tgggcaagtagctcagtgatagagcatcgacttctaatacggttggtcg  
ggggttcaaatccctccttccccgt

1-3tRNA-Asn(gtt)[153916,153989]  
 ttcccaagtagctcagtgccagagccgccgactgttaatcggctggtcgc  
 tgggtcaaatccagccttgggagt

>KJ019165.1 Synechococcus phage ACG-2014d isolate Syn7803C40, complete genome  
 1-1tRNA-Val(tac)[13620,13693]  
 tgggtgattaactcagtggttagagtactgctttacacgcagtaggtcac  
 tgggtcaaatccagtattacccat  
 1-2tRNA-Arg(tct)[153819,153893]  
 tgggcaagtagctcagtggttagagcatcgacttctaatacgcttggtcg  
 ggggttcaaatccctccttggccgt  
 1-3tRNA-Asn(gtt)[153914,153987]  
 ttcccaagtagctcagtgccagagccgccgactgttaatcggctggtcgc  
 tgggtcaaatccagccttgggagt

>KJ019032.1 Synechococcus phage ACG-2014d isolate Syn7803C49, complete genome  
 1-1tRNA-Val(tac)[13624,13697]  
 tgggtgattaactcagtggttagagtactgctttacacgcagtaggtcac  
 tgggtcaaatccagtattacccat  
 1-2tRNA-Arg(tct)[153844,153918]  
 tgggcaagtagctcagtggttagagcatcgacttctaatacgcttggtcg  
 ggggttcaaatccctccttggccgt  
 1-3tRNA-Asn(gtt)[153939,154012]  
 ttcccaagtagctcagtgccagagccgccgactgttaatcggctggtcgc  
 tgggtcaaatccagccttgggagt

>KJ019070.1 Synechococcus phage ACG-2014d isolate Syn7803US104, complete genome  
 1-1tRNA-Val(tac)[13621,13694]  
 tgggtgattaactcagtggttagagtactgctttacacgcagtaggtcac  
 tgggtcaaatccagtattacccat  
 1-2tRNA-Arg(tct)[153868,153942]  
 tgggcaagtagctcagtggttagagcatcgacttctaatacgcttggtcg  
 ggggttcaaatccctccttggccgt  
 1-3tRNA-Asn(gtt)[153963,154036]  
 ttcccaagtagctcagtgccagagccgccgactgttaatcggctggtcgc  
 tgggtcaaatccagccttgggagt

>KJ019080.1 Synechococcus phage ACG-2014d isolate Syn7803US116, complete genome  
 1-1tRNA-Val(tac)[13618,13691]  
 tgggtgattaactcagtggttagagtactgctttacacgcagtaggtcac  
 tgggtcaaatccagtattacccat  
 1-2tRNA-Arg(tct)[153508,153582]  
 tgggcaagtagctcagtggttagagcatcgacttctaatacgcttggtcg  
 ggggttcaaatccctccttggccgt  
 1-3tRNA-Asn(gtt)[153603,153676]  
 ttcccaagtagctcagtgccagagccgccgactgttaatcggctggtcgc  
 tgggtcaaatccagccttgggagt

>KJ019121.1 Synechococcus phage ACG-2014d isolate Syn7803US78, complete genome

1-tRNA-Val(tac)[13615,13688]  
tgggtgattaactcagtggttagagtgactgctttacacgcagtaggtcac  
tggttcaaatccagtattacccat  
1-2tRNA-Arg(tct)[153719,153793]  
tgggcaagtagctcagtggttagagcatcgacttctaatacgcttggtcgcg  
ggggttcaaatccctccttccccgt  
1-3tRNA-Asn(gtt)[153814,153887]  
ttccaagtagctcagtggcagagccgccgactgttaatcggctggtcgc  
tggttcaaatccagccttgggagt

>KJ019124.1 *Synechococcus* phage ACG-2014d isolate Syn7803US80, complete genome

1-tRNA-Val(tac)[13624,13697]  
tgggtgattaactcagtggttagagtgactgctttacacgcagtaggtcac  
tggttcaaatccagtattacccat  
1-2tRNA-Arg(tct)[153871,153945]  
tgggcaagtagctcagtggttagagcatcgacttctaatacgcttggtcgcg  
ggggttcaaatccctccttccccgt  
1-3tRNA-Asn(gtt)[153966,154039]  
ttccaagtagctcagtggcagagccgccgactgttaatcggctggtcgc  
tggttcaaatccagccttgggagt

>KJ019118.1 *Synechococcus* phage ACG-2014d isolate Syn7803US64, complete genome

1-tRNA-Val(tac)[13618,13691]  
tgggtgattaactcagtggttagagtgactgctttacacgcagtaggtcac  
tggttcaaatccagtattacccat  
1-2tRNA-Arg(tct)[153817,153891]  
tgggcaagtagctcagtggttagagcatcgacttctaatacgcttggtcgcg  
ggggttcaaatccctccttccccgt  
1-3tRNA-Asn(gtt)[153912,153985]  
ttccaagtagctcagtggcagagccgccgactgttaatcggctggtcgc  
tggttcaaatccagccttgggagt

>KJ019126.1 *Synechococcus* phage ACG-2014d isolate Syn7803US83, complete genome

1-tRNA-Val(tac)[13618,13691]  
tgggtgattaactcagtggttagagtgactgctttacacgcagtaggtcac  
tggttcaaatccagtattacccat  
1-2tRNA-Arg(tct)[153814,153888]  
tgggcaagtagctcagtggttagagcatcgacttctaatacgcttggtcgcg  
ggggttcaaatccctccttccccgt  
1-3tRNA-Asn(gtt)[153909,153982]  
ttccaagtagctcagtggcagagccgccgactgttaatcggctggtcgc  
tggttcaaatccagccttgggagt

>KJ019131.1 *Synechococcus* phage ACG-2014d isolate Syn7803US95, complete genome

1-tRNA-Val(tac)[13618,13691]  
tgggtgattaactcagtggttagagtgactgctttacacgcagtaggtcac  
tggttcaaatccagtattacccat  
1-2tRNA-Arg(tct)[153723,153797]

tgggcaagtagctcagtggttagagcatcgacttctaatacggttggtcg  
 ggggttcaaatccctcctgccccgt  
 1–3tRNA–Asn(gtt)[153818,153891]  
 ttccaagtagctcagtggttagagccgccgactgttaatcggctgggtcgc  
 tggttcaaatccagccttgggagt  
 >KJ019140.1 Synechococcus phage ACG–2014d isolate Syn7803C109, complete genome  
 1–1tRNA–Val(tac)[13618,13691]  
 tgggtgattaactcagtggttagagtactgctttacacgcagtaggtcac  
 tggttcaaatccagttattacccat  
 1–2tRNA–Arg(tct)[153726,153800]  
 tgggcaagtagctcagtggttagagcatcgacttctaatacggttggtcg  
 ggggttcaaatccctcctgccccgt  
 1–3tRNA–Asn(gtt)[153821,153894]  
 ttccaagtagctcagtggttagagccgccgactgttaatcggctgggtcgc  
 tggttcaaatccagccttgggagt  
 >KJ019162.1 Synechococcus phage ACG–2014d isolate Syn7803C37, complete genome  
 1–1tRNA–Val(tac)[13618,13691]  
 tgggtgattaactcagtggttagagtactgctttacacgcagtaggtcac  
 tggttcaaatccagttattacccat  
 1–2tRNA–Arg(tct)[153865,153939]  
 tgggcaagtagctcagtggttagagcatcgacttctaatacggttggtcg  
 ggggttcaaatccctcctgccccgt  
 1–3tRNA–Asn(gtt)[153960,154033]  
 ttccaagtagctcagtggttagagccgccgactgttaatcggctgggtcgc  
 tggttcaaatccagccttgggagt  
 >KJ019164.1 Synechococcus phage ACG–2014d isolate Syn7803C39, complete genome  
 1–1tRNA–Val(tac)[13684,13757]  
 tgggtgattaactcagtggttagagtactgctttacacgcagtaggtcac  
 tggttcaaatccagttattacccat  
 1–2tRNA–Arg(tct)[153788,153862]  
 tgggcaagtagctcagtggttagagcatcgacttctaatacggttggtcg  
 ggggttcaaatccctcctgccccgt  
 1–3tRNA–Asn(gtt)[153883,153956]  
 ttccaagtagctcagtggttagagccgccgactgttaatcggctgggtcgc  
 tggttcaaatccagccttgggagt  
 >KJ019034.1 Synechococcus phage ACG–2014d isolate Syn7803C54, complete genome  
 1–1tRNA–Val(tac)[13618,13691]  
 tgggtgattaactcagtggttagagtactgctttacacgcagtaggtcac  
 tggttcaaatccagttattacccat  
 1–2tRNA–Arg(tct)[153817,153891]  
 tgggcaagtagctcagtggttagagcatcgacttctaatacggttggtcg  
 ggggttcaaatccctcctgccccgt  
 1–3tRNA–Asn(gtt)[153912,153985]  
 ttccaagtagctcagtggttagagccgccgactgttaatcggctgggtcgc

tggttcaaatccagccttgggagt  
 >KJ019046.1 Synechococcus phage ACG-2014d isolate Syn7803C72, complete genome  
 1-tRNA-Val(tac)[13618,13691]  
 tgggtgattaactcagtggttagagtgactgctttacacgcagtaggtcac  
 tggttcaaatccagtattacccat  
 1-2tRNA-Arg(tct)[153819,153893]  
 tgggcaagtagctcagtggttagagcatcgacttctaatacgcttggtcgcg  
 ggggttcaaatccctccttggcccg  
 1-3tRNA-Asn(gtt)[153914,153987]  
 ttccaagtagctcagtggcagagccgccgactgttaatcggtggtcgc  
 tggttcaaatccagccttgggagt  
 >KJ019050.1 Synechococcus phage ACG-2014d isolate Syn7803C77, complete genome  
 1-tRNA-Val(tac)[13618,13691]  
 tgggtgattaactcagtggttagagtgactgctttacacgcagtaggtcac  
 tggttcaaatccagtattacccat  
 1-2tRNA-Arg(tct)[153818,153892]  
 tgggcaagtagctcagtggttagagcatcgacttctaatacgcttggtcgcg  
 ggggttcaaatccctccttggcccg  
 1-3tRNA-Asn(gtt)[153913,153986]  
 ttccaagtagctcagtggcagagccgccgactgttaatcggtggtcgc  
 tggttcaaatccagccttgggagt  
 >KJ019057.1 Synechococcus phage ACG-2014d isolate Syn7803C89, complete genome  
 1-tRNA-Val(tac)[13618,13691]  
 tgggtgattaactcagtggttagagtgactgctttacacgcagtaggtcac  
 tggttcaaatccagtattacccat  
 1-2tRNA-Arg(tct)[153722,153796]  
 tgggcaagtagctcagtggttagagcatcgacttctaatacgcttggtcgcg  
 ggggttcaaatccctccttggcccg  
 1-3tRNA-Asn(gtt)[153817,153890]  
 ttccaagtagctcagtggcagagccgccgactgttaatcggtggtcgc  
 tggttcaaatccagccttgggagt  
 >KJ019074.1 Synechococcus phage ACG-2014d isolate Syn7803US110, complete genome  
 1-tRNA-Val(tac)[13618,13691]  
 tgggtgattaactcagtggttagagtgactgctttacacgcagtaggtcac  
 tggttcaaatccagtattacccat  
 1-2tRNA-Arg(tct)[153722,153796]  
 tgggcaagtagctcagtggttagagcatcgacttctaatacgcttggtcgcg  
 ggggttcaaatccctccttggcccg  
 1-3tRNA-Asn(gtt)[153817,153890]  
 ttccaagtagctcagtggcagagccgccgactgttaatcggtggtcgc  
 tggttcaaatccagccttgggagt  
 >KJ019077.1 Synechococcus phage ACG-2014d isolate Syn7803US113, complete genome  
 1-tRNA-Val(tac)[13621,13694]  
 tgggtgattaactcagtggttagagtgactgctttacacgcagtaggtcac

tggttcaaatccagtattacccat  
 1–2tRNA–Arg(tct)[153820,153894]  
 tgggcaagtagctcagtgatagagcatcgacttctaatacggtggtcg  
 ggggttcaaatccctccttgcccgt  
 1–3tRNA–Asn(gtt)[153915,153988]  
 ttccaagtagctcagtggcagagccgccgactgttaatcggctggtcgc  
 tggttcaaatccagccttgggagt  
 >KJ019083.1 Synechococcus phage ACG–2014d isolate Syn7803US122, complete genome  
 1–1tRNA–Val(tac)[13618,13691]  
 tgggtgattaactcagtggtagagtactgctttacacgcagtaggtcac  
 tggttcaaatccagtattacccat  
 1–2tRNA–Arg(tct)[153722,153796]  
 tgggcaagtagctcagtgatagagcatcgacttctaatacggtggtcg  
 ggggttcaaatccctccttgcccgt  
 1–3tRNA–Asn(gtt)[153817,153890]  
 ttccaagtagctcagtggcagagccgccgactgttaatcggctggtcgc  
 tggttcaaatccagccttgggagt  
 >AP013540.1 Uncultured Mediterranean phage uvMED DNA, complete genome, group G8, isolate:  
 uvMED–CGR–C62A–MedDCM–OCT–S28–C10  
 1–1tRNA–Leu(taa)c[26490,26573]  
 gctcgggtgatggaattggtagacatacgggacttaaatccgggaccg  
 ttaggtcgtgagggttcagtcctccctgagca  
 >KJ019037.1 Synechococcus phage ACG–2014f isolate Syn7803C58, complete genome  
 1–1tRNA–Arg(tct)[129914,129987]  
 gggtcagtagctcagatggatagagcaattcacttctaataatggtcgc  
 ggggttcgagtcctcctgacccg  
 1–2tRNA–Asn(gtt)[130201,130272]  
 tccacaatagctcagcggtagagtcggcgactgttaatcgccctgtccct  
 ggttcgaatccaggttgtggag  
 >KJ019045.1 Synechococcus phage ACG–2014f isolate Syn7803C6, complete genome  
 1–1tRNA–Arg(tct)[130564,130637]  
 gggttaatagctcagctggacagagcaacgctcttctaaagcgtcggtcg  
 ttggttcgaatccaacttaaccg  
 1–2tRNA–Asn(gtt)[130851,130922]  
 tccacaatagctcagcggtagagtcggcgactgttaatcgccctgtccct  
 ggttcgaatccaggttgtggag  
 >KJ019052.1 Synechococcus phage ACG–2014f isolate Syn7803C7, complete genome  
 1–1tRNA–Arg(tct)[127858,127931]  
 gggttaatagctcagctggacagagcaacgctcttctaaagcgtcggtcg  
 ttggttcgaatccaacttaaccg  
 1–2tRNA–Asn(gtt)[128145,128216]  
 tccacaatagctcagcggtagagtcggcgactgttaatcgccctgtccct  
 ggttcgaatccaggttgtggag  
 >KJ019053.1 Synechococcus phage ACG–2014f isolate Syn7803C80, complete genome

1-tRNA-Arg(tct)[130447,130520]  
gggtcagtagctcagatggatagagcaattcacttctaataatggtcgcg  
ggggttcgagtcacctcctgacccg

1-2tRNA-Asn(gtt)[130734,130805]  
tccacaatagctcagcggtagagtcggcgactgttaatgccttgtccct  
ggttcgaatccagggtgtggag

>KJ019058.1 Synechococcus phage ACG-2014f isolate Syn7803C8, complete genome  
1-tRNA-Arg(tct)[128055,128128]  
gggttaatagctcagctggacagagcaacgctcttctaagcgtcggtcg  
ttggttcgaatccaacttaacccg

1-2tRNA-Asn(gtt)[128342,128413]  
tccacaatagctcagcggtagagtcggcgactgttaatgccttgtccct  
ggttcgaatccagggtgtggag

>KJ019066.1 Synechococcus phage ACG-2014f isolate Syn7803C9, complete genome  
1-tRNA-Arg(tct)[130889,130962]  
gggtcagtagctcagatggatagagcaattcacttctaataatggtcgcg  
ggggttcgagtcacctcctgacccg

1-2tRNA-Asn(gtt)[131176,131247]  
tccacaatagctcagcggtagagtcggcgactgttaatgccttgtccct  
ggttcgaatccagggtgtggag

>KJ019085.1 Synechococcus phage ACG-2014f isolate Syn7803US13, complete genome  
1-tRNA-Arg(tct)[126042,126115]  
gggttaatagctcagctggacagagcaacgctcttctaagcgtcggtcg  
ttggttcgaatccaacttaacccg

1-2tRNA-Asn(gtt)[126329,126400]  
tccacaatagctcagcggtagagtcggcgactgttaatgccttgtccct  
ggttcgaatccagggtgtggag

>KJ019086.1 Synechococcus phage ACG-2014f isolate Syn7803US17, complete genome  
1-tRNA-Arg(tct)[128795,128868]  
gggttaatagctcagctggacagagcaacgctcttctaagcgtcggtcg  
ttggttcgaatccaacttaacccg

1-2tRNA-Asn(gtt)[129082,129153]  
tccacaatagctcagcggtagagtcggcgactgttaatgccttgtccct  
ggttcgaatccagggtgtggag

>KJ019090.1 Synechococcus phage ACG-2014f isolate Syn7803US24, complete genome  
1-tRNA-Arg(tct)[128060,128133]  
gggttaatagctcagctggacagagcaataactcttctaagtatcggtcg  
ttggttcgaatccaacttaacccg

1-2tRNA-Asn(gtt)[128347,128418]  
tccacaatagctcagcggtagagtcggcgactgttaatgccttgtccct  
ggttcgaatccagggtgtggag

>KJ019091.1 Synechococcus phage ACG-2014f isolate Syn7803US26, complete genome  
1-tRNA-Arg(tct)[126211,126284]  
gggttaatagctcagctggacagagcaacgctcttctaagcgtcggtcg

ttggtcgaatccaacttaaccg  
 1-2tRNA-Asn(gtt)[126498,126569]  
 tccacaatagctcagcggtagctcgcgactgttaatgccttgcct  
 ggttcgaatccaggttggag  
 >KJ019092.1 Synechococcus phage ACG-2014f isolate Syn7803US2, complete genome  
 1-1tRNA-Arg(tct)[129445,129518]  
 gggtaatagctcagctggacagagcaacgctcttctaaagcgtcggtcg  
 ttggtcgaatccaacttaaccg  
 1-2tRNA-Asn(gtt)[129732,129803]  
 tccacaatagctcagcggtagctcgcgactgttaatgccttgcct  
 ggttcgaatccaggttggag  
 >KJ019093.1 Synechococcus phage ACG-2014f isolate Syn7803US30, complete genome  
 1-1tRNA-Arg(tct)[126955,127028]  
 gggtaatagctcagctggacagagcaacgctcttctaaagcgtcggtcg  
 ttggtcgaatccaacttaaccg  
 1-2tRNA-Asn(gtt)[127242,127313]  
 tccacaatagctcagcggtagctcgcgactgttaatgccttgcct  
 ggttcgaatccaggttggag  
 >KJ019095.1 Synechococcus phage ACG-2014f isolate Syn7803US34, complete genome  
 1-1tRNA-Arg(tct)[130385,130458]  
 gggtaatagctcagctggacagagcaacgctcttctaaagcgtcggtcg  
 ttggtcgaatccaacttaaccg  
 1-2tRNA-Asn(gtt)[130672,130743]  
 tccacaatagctcagcggtagctcgcgactgttaatgccttgcct  
 ggttcgaatccaggttggag  
 >KJ019096.1 Synechococcus phage ACG-2014f isolate Syn7803US36, complete genome  
 1-1tRNA-Arg(tct)[128792,128865]  
 gggtaatagctcagctggacagagcaacgctcttctaaagcgtcggtcg  
 ttggtcgaatccaacttaaccg  
 1-2tRNA-Asn(gtt)[129079,129150]  
 tccacaatagctcagcggtagctcgcgactgttaatgccttgcct  
 ggttcgaatccaggttggag  
 >KJ019097.1 Synechococcus phage ACG-2014f isolate Syn7803US37, complete genome  
 1-1tRNA-Arg(tct)[131822,131895]  
 gggtagtagctcagatggatagagcaattcacttctaatgaattgggtcg  
 ggggttcgagtcctcctgacccg  
 1-2tRNA-Asn(gtt)[132109,132180]  
 tccacaatagctcagcggtagctcgcgactgttaatgccttgcct  
 ggttcgaatccaggttggag  
 >KJ019098.1 Synechococcus phage ACG-2014f isolate Syn7803US39, complete genome  
 1-1tRNA-Arg(tct)[131659,131732]  
 gggtagtagctcagatggatagagcaattcacttctaatgaattgggtcg  
 ggggttcgagtcctcctgacccg  
 1-2tRNA-Asn(gtt)[131946,132017]



tccacaatagctcagcggtagagtcggcgactgttaatgccttgccct  
 ggttcgaatccaggtgtggag  
 >KJ019099.1 Synechococcus phage ACG-2014f isolate Syn7803US3, complete genome  
 1-1tRNA-Arg(tct)[130232,130305]  
 gggtcagtagctcagatggatagagcaattcacttctaataattgggtcg  
 ggggttcgagtcctcctgacccg  
 1-2tRNA-Asn(gtt)[130519,130590]  
 tccacaatagctcagcggtagagtcggcgactgttaatgccttgccct  
 ggttcgaatccaggtgtggag  
 >KJ019100.1 Synechococcus phage ACG-2014f isolate Syn7803US40, complete genome  
 1-1tRNA-Arg(tct)[128559,128632]  
 gggtaatagctcagctggacagagcaacgctcttctaaagcgtcgggtcg  
 ttggttcgaatccaacttaaccg  
 1-2tRNA-Asn(gtt)[128846,128917]  
 tccacaatagctcagcggtagagtcggcgactgttaatgccttgccct  
 ggttcgaatccaggtgtggag  
 >KJ019101.1 Synechococcus phage ACG-2014f isolate Syn7803US42, complete genome  
 1-1tRNA-Arg(tct)[128398,128471]  
 gggtcagtagctcagatggatagagcaattcacttctaataattgggtcg  
 ggggttcgagtcctcctgacccg  
 1-2tRNA-Asn(gtt)[128685,128756]  
 tccacaatagctcagcggtagagtcggcgactgttaatgccttgccct  
 ggttcgaatccaggtgtggag  
 >KJ019102.1 Synechococcus phage ACG-2014f isolate Syn7803US43, complete genome  
 1-1tRNA-Arg(tct)[129626,129699]  
 gggtcagtagctcagatggatagagcaattcacttctaataattgggtcg  
 ggggttcgagtcctcctgacccg  
 1-2tRNA-Asn(gtt)[129913,129984]  
 tccacaatagctcagcggtagagtcggcgactgttaatgccttgccct  
 ggttcgaatccaggtgtggag  
 >KJ019103.1 Synechococcus phage ACG-2014f isolate Syn7803US44, complete genome  
 1-1tRNA-Arg(tct)[128491,128564]  
 gggtaatagctcagctggacagagcaatactcttctaaagtatcgggtcg  
 ttggttcgaatccaacttaaccg  
 1-2tRNA-Asn(gtt)[128778,128849]  
 tccacaatagctcagcggtagagtcggcgactgttaatgccttgccct  
 ggttcgaatccaggtgtggag  
 >KJ019105.1 Synechococcus phage ACG-2014f isolate Syn7803US4, complete genome  
 1-1tRNA-Arg(tct)[126959,127032]  
 gggtaatagctcagctggacagagcaacgctcttctaaagcgtcgggtcg  
 ttggttcgaatccaacttaaccg  
 1-2tRNA-Asn(gtt)[127246,127317]  
 tccacaatagctcagcggtagagtcggcgactgttaatgccttgccct  
 ggttcgaatccaggtgtggag

>KJ019106.1 *Synechococcus* phage ACG-2014f isolate Syn7803US50, complete genome  
1-tRNA-Arg(tct)[128265,128338]  
gggtcagtagctcagatggatagagcaattcacttctaataatgggtcg  
ggggttcgagtcctcctgacccg  
1-2tRNA-Asn(gtt)[128552,128623]  
tccacaatagctcagcggtagagtcggcgactgttaatcgcttgtccct  
ggttcgaatccaggttgtggag

>KJ019107.1 *Synechococcus* phage ACG-2014f isolate Syn7803US52, complete genome  
1-tRNA-Arg(tct)[126562,126635]  
gggttaatagctcagctggacagagcaacgctcttctaaagcgtcggtcg  
ttggttcgaatccaacttaaccg  
1-2tRNA-Asn(gtt)[126849,126920]  
tccacaatagctcagcggtagagtcggcgactgttaatcgcttgtccct  
ggttcgaatccaggttgtggag

>KJ019111.1 *Synechococcus* phage ACG-2014f isolate Syn7803US57, complete genome  
1-tRNA-Arg(tct)[126245,126318]  
gggttaatagctcagctggacagagcaacgctcttctaaagcgtcggtcg  
ttggttcgaatccaacttaaccg  
1-2tRNA-Asn(gtt)[126532,126603]  
tccacaatagctcagcggtagagtcggcgactgttaatcgcttgtccct  
ggttcgaatccaggttgtggag

>KJ019123.1 *Synechococcus* phage ACG-2014f isolate Syn7803US7, complete genome  
1-tRNA-Arg(tct)[125134,125207]  
gggttaatagctcagctggacagagcaacgctcttctaaagcgtcggtcg  
ttggttcgaatccaacttaaccg  
1-2tRNA-Asn(gtt)[125421,125492]  
tccacaatagctcagcggtagagtcggcgactgttaatcgcttgtccct  
ggttcgaatccaggttgtggag

>KJ019141.1 *Synechococcus* phage ACG-2014f isolate Syn7803C10, complete genome  
1-tRNA-Arg(tct)[126776,126849]  
gggttaatagctcagctggacagagcaacgctcttctaaagcgtcggtcg  
ttggttcgaatccaacttaaccg  
1-2tRNA-Asn(gtt)[127063,127134]  
tccacaatagctcagcggtagagtcggcgactgttaatcgcttgtccct  
ggttcgaatccaggttgtggag

>KJ019142.1 *Synechococcus* phage ACG-2014f isolate Syn7803C11, complete genome  
1-tRNA-Arg(tct)[126895,126968]  
gggttaatagctcagctggacagagcaacgctcttctaaagcgtcggtcg  
ttggttcgaatccaacttaaccg  
1-2tRNA-Asn(gtt)[127182,127253]  
tccacaatagctcagcggtagagtcggcgactgttaatcgcttgtccct  
ggttcgaatccaggttgtggag

>KJ019143.1 *Synechococcus* phage ACG-2014f isolate Syn7803C12, complete genome  
1-tRNA-Arg(tct)[128169,128242]

gggttaatagctcagctggacagagcaacgctcttctaaagcgtcggtcg  
 ttggtcgaatccaacttaacccg  
 1-2tRNA-Asn(gtt)[128456,128527]  
 tccacaatagctcagcggtagagtcggcgactgttaatcgccctgtccct  
 ggttcgaatccaggttgtggag  
 >KJ019144.1 Synechococcus phage ACG-2014f isolate Syn7803C14, complete genome  
 1-1tRNA-Arg(tct)[126240,126313]  
 gggttaatagctcagctggacagagcaacgctcttctaaagcgtcggtcg  
 ttggtcgaatccaacttaacccg  
 1-2tRNA-Asn(gtt)[126527,126598]  
 tccacaatagctcagcggtagagtcggcgactgttaatcgccctgtccct  
 ggttcgaatccaggttgtggag  
 >KJ019145.1 Synechococcus phage ACG-2014f isolate Syn7803C15, complete genome  
 1-1tRNA-Arg(tct)[129910,129983]  
 gggtcagtagctcagatggatagagcaattcacttctaataaattgggtcg  
 ggggttcgagtcacctcctgacccg  
 1-2tRNA-Asn(gtt)[130197,130268]  
 tccacaatagctcagcggtagagtcggcgactgttaatcgccctgtccct  
 ggttcgaatccaggttgtggag  
 >KJ019146.1 Synechococcus phage ACG-2014f isolate Syn7803C16, complete genome  
 1-1tRNA-Arg(tct)[129741,129814]  
 gggttaatagctcagctggacagagcaacgctcttctaaagcgtcggtcg  
 ttggtcgaatccaacttaacccg  
 1-2tRNA-Asn(gtt)[130028,130099]  
 tccacaatagctcagcggtagagtcggcgactgttaatcgccctgtccct  
 ggttcgaatccaggttgtggag  
 >KJ019147.1 Synechococcus phage ACG-2014f isolate Syn7803C17, complete genome  
 1-1tRNA-Arg(tct)[127192,127265]  
 gggtcagtagctcagatggatagagcaattcacttctaataaattgggtcg  
 ggggttcgagtcacctcctgacccg  
 1-2tRNA-Asn(gtt)[127479,127550]  
 tccacaatagctcagcggtagagtcggcgactgttaatcgccctgtccct  
 ggttcgaatccaggttgtggag  
 >KJ019148.1 Synechococcus phage ACG-2014f isolate Syn7803C19, complete genome  
 1-1tRNA-Arg(tct)[125246,125319]  
 gggtcagtagctcagatggatagagcaattcacttctaataaattgggtcg  
 ggggttcgagtcacctcctgacccg  
 1-2tRNA-Asn(gtt)[125533,125604]  
 tccacaatagctcagcggtagagtcggcgactgttaatcgccctgtccct  
 ggttcgaatccaggttgtggag  
 >KJ019149.1 Synechococcus phage ACG-2014f isolate Syn7803C21, complete genome  
 1-1tRNA-Arg(tct)[127725,127798]  
 gggtcagtagctcagatggatagagcaattcacttctaataaattgggtcg  
 ggggttcgagtcacctcctgacccg

1-2tRNA-Asn(gtt)[128012,128083]  
 tccacaatagctcagcggtagagtcggcgactgttaatcgccctgtccct  
 gggtcgaatccagggtgtggag

>KJ019150.1 Synechococcus phage ACG-2014f isolate Syn7803C22, complete genome  
 1-1tRNA-Arg(tct)[131303,131376]  
 ggggttaatagctcagctggacagagcaacgctcttctaaagcgtcggtcg  
 ttgggtcgaatccaacttaaccg  
 1-2tRNA-Asn(gtt)[131590,131661]  
 tccacaatagctcagcggtagagtcggcgactgttaatcgccctgtccct  
 gggtcgaatccagggtgtggag

>KJ019151.1 Synechococcus phage ACG-2014f isolate Syn7803C24, complete genome  
 1-1tRNA-Arg(tct)[128601,128674]  
 ggggttaatagctcagctggacagagcaacgctcttctaaagcgtcggtcg  
 ttgggtcgaatccaacttaaccg  
 1-2tRNA-Asn(gtt)[128888,128959]  
 tccacaatagctcagcggtagagtcggcgactgttaatcgccctgtccct  
 gggtcgaatccagggtgtggag

>KJ019152.1 Synechococcus phage ACG-2014f isolate Syn7803C25, complete genome  
 1-1tRNA-Arg(tct)[129664,129737]  
 gggtcagtagctcagatggatagagcaattcacttctaatgaattggtcg  
 ggggttcgagtcctcctgacccg  
 1-2tRNA-Asn(gtt)[129951,130022]  
 tccacaatagctcagcggtagagtcggcgactgttaatcgccctgtccct  
 gggtcgaatccagggtgtggag

>KJ019155.1 Synechococcus phage ACG-2014f isolate Syn7803C29, complete genome  
 1-1tRNA-Arg(tct)[126281,126354]  
 ggggttaatagctcagctggacagagcaacgctcttctaaagcgtcggtcg  
 ttgggtcgaatccaacttaaccg  
 1-2tRNA-Asn(gtt)[126568,126639]  
 tccacaatagctcagcggtagagtcggcgactgttaatcgccctgtccct  
 gggtcgaatccagggtgtggag

>KJ019159.1 Synechococcus phage ACG-2014f isolate Syn7803C34, complete genome  
 1-1tRNA-Arg(tct)[128066,128139]  
 ggggttaatagctcagctggacagagcaatactcttctaaagtatcggtcg  
 ttgggtcgaatccaacttaaccg  
 1-2tRNA-Asn(gtt)[128353,128424]  
 tccacaatagctcagcggtagagtcggcgactgttaatcgccctgtccct  
 gggtcgaatccagggtgtggag

>KJ019026.1 Synechococcus phage ACG-2014a isolate Syn7803C42, complete genome  
 1-1tRNA-Val(tac)[13070,13141]  
 gggcgaataactcagcggtagagtgccctctttacacggagattgtcggg  
 gggtcgatcccctcttcgcca  
 1-2tRNA-Leu(taa)[18060,18146]  
 tgggagtggtggcggaatcggtagacgcaccagacttaaaatctgttgaga

attaatctcgtgggggtcaagtccttctcccat  
1-3tRNA-Thr(tgt)[18770,18842]  
gcctccgtagctcagtggttagagcagggtttgtaaagctcaggtcgca  
agttcaaatctgtcagaggctc  
1-4tRNA-Asn(gtt)[18847,18919]  
tcctctatagctcagttggttagagcaggtgactgttaatcacctgtccc  
tggttcgagtcaggtggaggag  
1-5tRNA-Arg(tct)[154484,154559]  
tgggtcagtagctcagatggatagagcaactgccttctaagcagtcggcc  
acaggttcgagtcctgtctgaccgt

>KJ019030.1 Synechococcus phage ACG-2014a isolate Syn7803C47, complete genome

1-1tRNA-Val(tac)[13064,13135]  
gggcgaataactcagcggtagagtgctcctttacacggagattgtcggg  
ggttcgatcccctcttcgcca  
1-2tRNA-Leu(taa)[18054,18140]  
tgggagtggtggcggaatcggtagacgcaccagacttaaaatctgttgaga  
attaatctcgtgggggtcaagtccttctcccat  
1-3tRNA-Thr(tgt)[18764,18836]  
gcctccgtagctcagtggttagagcagggtttgtaaagctcaggtcgca  
agttcaaatctgtcagaggctc  
1-4tRNA-Asn(gtt)[18841,18913]  
tcctctatagctcagttggttagagcaggtgactgttaatcacctgtccc  
tggttcgagtcaggtggaggag  
1-5tRNA-Arg(tct)[154576,154651]  
tgggtcagtagctcagatggatagagcaactgccttctaagcagtcggcc  
acaggttcgagtcctgtctgaccgt

>KJ019033.1 Synechococcus phage ACG-2014a isolate Syn7803C53, complete genome

1-1tRNA-Val(tac)[13064,13135]  
gggcgaataactcagcggtagagtgctcctttacacggagattgtcggg  
ggttcgatcccctcttcgcca  
1-2tRNA-Leu(taa)[18054,18140]  
tgggagtggtggcggaatcggtagacgcaccagacttaaaatctgttgaga  
attaatctcgtgggggtcaagtccttctcccat  
1-3tRNA-Thr(tgt)[18764,18836]  
gcctccgtagctcagtggttagagcagggtttgtaaagctcaggtcgca  
agttcaaatctgtcagaggctc  
1-4tRNA-Asn(gtt)[18841,18913]  
tcctctatagctcagttggttagagcaggtgactgttaatcacctgtccc  
tggttcgagtcaggtggaggag  
1-5tRNA-Arg(tct)[154326,154401]  
tgggtcagtagctcagatggatagagcaactgccttctaagcagtcggcc  
acaggttcgagtcctgtctgaccgt

>KJ019038.1 Synechococcus phage ACG-2014a isolate Syn7803C59, complete genome

1-1tRNA-Val(tac)[13064,13135]

gggcgaataactcagcggtagagtgcctcctttacacggagattgtcggg  
ggttcgatcccctcttcgcca  
1-2tRNA-Leu(taa)[18054,18140]  
tgggagtggtgcggaatcggtagacgcaccagacttaaaatctgttgaga  
attaatctcgtgggggtcaagtccttctcccat  
1-3tRNA-Thr(tgt)[18764,18836]  
gcctccgtagctcagtggtagagcaggcctttgtaaagtcaggtcgca  
agttcaaactctgtcagaggctc  
1-4tRNA-Asn(gtt)[18841,18913]  
tcctctatagctcagttggtagagcagtgactgttaatcacctgtccc  
tggttcaggtccaggtggaggag  
1-5tRNA-Arg(tct)[154355,154430]  
tgggtcagtagctcagatggatagagcaactgccttctaagcagtcggcc  
acaggttcgagtcctgtctgaccgt

>KJ019039.1 Synechococcus phage ACG-2014a isolate Syn7803C60, complete genome

1-1tRNA-Val(tac)[13064,13135]  
gggcgaataactcagcggtagagtgcctcctttacacggagattgtcggg  
ggttcgatcccctcttcgcca  
1-2tRNA-Leu(taa)[18054,18140]  
tgggagtggtgcggaatcggtagacgcaccagacttaaaatctgttgaga  
attaatctcgtgggggtcaagtccttctcccat  
1-3tRNA-Thr(tgt)[18764,18836]  
gcctccgtagctcagtggtagagcaggcctttgtaaagtcaggtcgca  
agttcaaactctgtcagaggctc  
1-4tRNA-Asn(gtt)[18841,18913]  
tcctctatagctcagttggtagagcagtgactgttaatcacctgtccc  
tggttcaggtccaggtggaggag  
1-5tRNA-Arg(tct)[154581,154656]  
tgggtcagtagctcagatggatagagcaactgccttctaagcagtcggcc  
acaggttcgagtcctgtctgaccgt

>KJ019055.1 Synechococcus phage ACG-2014a isolate Syn7803C86, complete genome

1-1tRNA-Val(tac)[13064,13135]  
gggcgaataactcagcggtagagtgcctcctttacacggagattgtcggg  
ggttcgatcccctcttcgcca  
1-2tRNA-Leu(taa)[18054,18140]  
tgggagtggtgcggaatcggtagacgcaccagacttaaaatctgttgaga  
attaatctcgtgggggtcaagtccttctcccat  
1-3tRNA-Thr(tgt)[18764,18836]  
gcctccgtagctcagtggtagagcaggcctttgtaaagtcaggtcgca  
agttcaaactctgtcagaggctc  
1-4tRNA-Asn(gtt)[18841,18913]  
tcctctatagctcagttggtagagcagtgactgttaatcacctgtccc  
tggttcaggtccaggtggaggag  
1-5tRNA-Arg(tct)[154576,154651]

tgggtcagtagctcagatggatagagcaactgccttctaagcagtcggcc  
acaggttcgagtcctgtctgaccgt

>KJ019065.1 Synechococcus phage ACG-2014a isolate Syn7803C99, complete genome

1-tRNA-Val(tac)[13064,13135]  
gggcgaataactcagcggtagagtgctcctttacacggagattgtcggg  
ggttcgatcccctcttcgcca  
1-2tRNA-Leu(taa)[18054,18140]  
tgggagtggtgcggaatcggtagacgcaccagacttaaaatctgttgaga  
attaatctcgtgggggtcaagtccttctcccat  
1-3tRNA-Thr(tgt)[18764,18836]  
gcctccgtagctcagtggtagagcaggcctttgtaaagctcaggtcgca  
agttcaaatctgtcagaggctc  
1-4tRNA-Asn(gtt)[18841,18913]  
tcctctatagctcagttggtagagcagtgactgttaatcacctgtccc  
tggttcgagtcagggtggaggag  
1-5tRNA-Arg(tct)[154470,154545]  
tgggtcagtagctcagatggatagagcaactgccttctaagcagtcggcc  
acaggttcgagtcctgtctgaccgt

>KJ019067.1 Synechococcus phage ACG-2014a isolate Syn7803US101, complete genome

1-tRNA-Val(tac)[13064,13135]  
gggcgaataactcagcggtagagtgctcctttacacggagattgtcggg  
ggttcgatcccctcttcgcca  
1-2tRNA-Leu(taa)[18054,18140]  
tgggagtggtgcggaatcggtagacgcaccagacttaaaatctgttgaga  
attaatctcgtgggggtcaagtccttctcccat  
1-3tRNA-Thr(tgt)[18765,18837]  
gcctccgtagctcagtggtagagcaggcctttgtaaagctcaggtcgca  
agttcaaatctgtcagaggctc  
1-4tRNA-Asn(gtt)[18842,18914]  
tcctctatagctcagttggtagagcagtgactgttaatcacctgtccc  
tggttcgagtcagggtggaggag  
1-5tRNA-Arg(tct)[154483,154558]  
tgggtcagtagctcagatggatagagcaactgccttctaagcagtcggcc  
acaggttcgagtcctgtctgaccgt

>KJ019068.1 Synechococcus phage ACG-2014a isolate Syn7803US102, complete genome

1-tRNA-Val(tac)[13064,13135]  
gggcgaataactcagcggtagagtgctcctttacacggagattgtcggg  
ggttcgatcccctcttcgcca  
1-2tRNA-Leu(taa)[18054,18140]  
tgggagtggtgcggaatcggtagacgcaccagacttaaaatctgttgaga  
attaatctcgtgggggtcaagtccttctcccat  
1-3tRNA-Thr(tgt)[18764,18836]  
gcctccgtagctcagtggtagagcaggcctttgtaaagctcaggtcgca  
agttcaaatctgtcagaggctc

1-4tRNA-Asn(gtt)[18841,18913]  
tcctctatagctcagttggttagagcaggtgactgttaatcacctgtccc  
tggttcgagtcagggtggaggag  
1-5tRNA-Arg(tct)[154479,154554]  
tgggtcagtagctcagatggatagagcaactgccttctaagcagtcggcc  
acaggttcgagtcctgtctgacctgt

>KJ019076.1 Synechococcus phage ACG-2014a isolate Syn7803US112, complete genome

1-1tRNA-Val(tac)[13064,13135]  
gggcgaataactcagcggtagagtgccctctttacacggagattgtcggg  
ggttcgatcccctcttcgcca  
1-2tRNA-Leu(taa)[18054,18140]  
tgggagtggtggcgaatcggtagacgcaccagacttaaaatctgttgaga  
attaatctcgtgggggtcaagtccttctcccat  
1-3tRNA-Thr(tgt)[18764,18836]  
gcctccgtagctcagtggttagagcagggtttgtaaagtcaggtcgca  
agttcaaatctgtcagaggctc  
1-4tRNA-Asn(gtt)[18841,18913]  
tcctctatagctcagttggttagagcaggtgactgttaatcacctgtccc  
tggttcgagtcagggtggaggag  
1-5tRNA-Arg(tct)[155669,155744]  
tgggtcagtagctcagatggatagagcaactgccttctaagcagtcggcc  
acaggttcgagtcctgtctgacctgt

>KJ019081.1 Synechococcus phage ACG-2014a isolate Syn7803US117, complete genome

1-1tRNA-Val(tac)[13064,13135]  
gggcgaataactcagcggtagagtgccctctttacacggagattgtcggg  
ggttcgatcccctcttcgcca  
1-2tRNA-Leu(taa)[18054,18140]  
tgggagtggtggcgaatcggtagacgcaccagacttaaaatctgttgaga  
attaatctcgtgggggtcaagtccttctcccat  
1-3tRNA-Thr(tgt)[18765,18837]  
gcctccgtagctcagtggttagagcagggtttgtaaagtcaggtcgca  
agttcaaatctgtcagaggctc  
1-4tRNA-Asn(gtt)[18842,18914]  
tcctctatagctcagttggttagagcaggtgactgttaatcacctgtccc  
tggttcgagtcagggtggaggag  
1-5tRNA-Arg(tct)[154483,154558]  
tgggtcagtagctcagatggatagagcaactgccttctaagcagtcggcc  
acaggttcgagtcctgtctgacctgt

>KJ019084.1 Synechococcus phage ACG-2014a isolate Syn7803US123, complete genome

1-1tRNA-Val(tac)[13064,13135]  
gggcgaataactcagcggtagagtgccctctttacacggagattgtcggg  
ggttcgatcccctcttcgcca  
1-2tRNA-Leu(taa)[18054,18140]  
tgggagtggtggcgaatcggtagacgcaccagacttaaaatctgttgaga



attaatctcgtgggggtcaagtccttctcccat  
1-3tRNA-Thr(tgt)[18764,18836]  
gcctccgtagctcagtggttagagcaggcctttgtaaagctcaggtcgca  
agttcaaatctgtcagaggctc  
1-4tRNA-Asn(gtt)[18841,18913]  
tcctctatagctcagttggttagagcaggtgactgttaatcacctgtccc  
tggttcgagtcaggtggaggag  
1-5tRNA-Arg(tct)[154480,154555]  
tgggtcagtagctcagatggatagagcaactgccttctaagcagtcggcc  
acaggttcgagtcctgtctgaccgt

>KJ019087.1 Synechococcus phage ACG-2014a isolate Syn7803US19, complete genome

1-1tRNA-Val(tac)[13064,13135]  
gggcgaataactcagcggtagagtgctcctttacacggagattgtcggg  
ggttcgatcccctcttcgcca  
1-2tRNA-Leu(taa)[18054,18140]  
tgggagtggtggcgaatcggttagacgcaccagacttaaaatctgttgaga  
attaatctcgtgggggtcaagtccttctcccat  
1-3tRNA-Thr(tgt)[18764,18836]  
gcctccgtagctcagtggttagagcaggcctttgtaaagctcaggtcgca  
agttcaaatctgtcagaggctc  
1-4tRNA-Asn(gtt)[18841,18913]  
tcctctatagctcagttggttagagcaggtgactgttaatcacctgtccc  
tggttcgagtcaggtggaggag  
1-5tRNA-Arg(tct)[154520,154595]  
tgggtcagtagctcagatggatagagcaactgccttctaagcagtcggcc  
acaggttcgagtcctgtctgaccgt

>KJ019088.1 Synechococcus phage ACG-2014a isolate Syn7803US1, complete genome

1-1tRNA-Val(tac)[13058,13129]  
gggcgaataactcagcggtagagtgctcctttacacggagattgtcggg  
ggttcgatcccctcttcgcca  
1-2tRNA-Leu(taa)[18048,18134]  
tgggagtggtggcgaatcggttagacgcaccagacttaaaatctgttgaga  
attaatctcgtgggggtcaagtccttctcccat  
1-3tRNA-Thr(tgt)[18758,18830]  
gcctccgtagctcagtggttagagcaggcctttgtaaagctcaggtcgca  
agttcaaatctgtcagaggctc  
1-4tRNA-Asn(gtt)[18835,18907]  
tcctctatagctcagttggttagagcaggtgactgttaatcacctgtccc  
tggttcgagtcaggtggaggag  
1-5tRNA-Arg(tct)[154558,154633]  
tgggtcagtagctcagatggatagagcaactgccttctaagcagtcggcc  
acaggttcgagtcctgtctgaccgt

>KJ019114.1 Synechococcus phage ACG-2014a isolate Syn7803US60, complete genome

1-1tRNA-Val(tac)[13064,13135]

gggcgaataactcagcggtagagtgccctctttacacggagattgtcggg  
ggttcgatcccctcttcgcca  
1-2tRNA-Leu(taa)[18054,18140]  
tgggagtggtgcggaatcggtagacgcaccagactaaaatctgttgaga  
attaatctcgtgggggtcaagtccttctcccat  
1-3tRNA-Thr(tgt)[18765,18837]  
gcctccgtagctcagtggtagagcaggcctttgtaaagtcaggtcgca  
agttcaaatctgtcagaggctc  
1-4tRNA-Asn(gtt)[18842,18914]  
tcctctatagctcagttggtagagcagtgactgttaatcacctgtccc  
tggttcaggtccaggtggaggag  
1-5tRNA-Arg(tct)[154483,154558]  
tgggtcagtagctcagatggatagagcaactgccttctaagcagtcggcc  
acaggttcgagtcctgtctgaccgt

>KJ019116.1 Synechococcus phage ACG-2014a isolate Syn7803US62, complete genome

1-1tRNA-Val(tac)[13064,13135]  
gggcgaataactcagcggtagagtgccctctttacacggagattgtcggg  
ggttcgatcccctcttcgcca  
1-2tRNA-Leu(taa)[17866,17952]  
tgggagtggtgcggaatcggtagacgcaccagactaaaatctgttgaga  
attaatctcgtgggggtcaagtccttctcccat  
1-3tRNA-Thr(tgt)[18576,18648]  
gcctccgtagctcagtggtagagcaggcctttgtaaagtcaggtcgca  
agttcaaatctgtcagaggctc  
1-4tRNA-Asn(gtt)[18653,18725]  
tcctctatagctcagttggtagagcagtgactgttaatcacctgtccc  
tggttcaggtccaggtggaggag  
1-5tRNA-Arg(tct)[153978,154053]  
tgggtcagtagctcagatggatagagcaactgccttctaagcagtcggcc  
acaggttcgagtcctgtctgaccgt

>KJ019122.1 Synechococcus phage ACG-2014a isolate Syn7803US79, complete genome

1-1tRNA-Val(tac)[13064,13135]  
gggcgaataactcagcggtagagtgccctctttacacggagattgtcggg  
ggttcgatcccctcttcgcca  
1-2tRNA-Leu(taa)[18054,18140]  
tgggagtggtgcggaatcggtagacgcaccagactaaaatctgttgaga  
attaatctcgtgggggtcaagtccttctcccat  
1-3tRNA-Thr(tgt)[18764,18836]  
gcctccgtagctcagtggtagagcaggcctttgtaaagtcaggtcgca  
agttcaaatctgtcagaggctc  
1-4tRNA-Asn(gtt)[18841,18913]  
tcctctatagctcagttggtagagcagtgactgttaatcacctgtccc  
tggttcaggtccaggtggaggag  
1-5tRNA-Arg(tct)[154472,154547]

tggtcagtagctcagatggatagagcaactgccttctaagcagtcggcc  
acaggttcgagtcctgtctgaccgt

>KJ019135.1 Synechococcus phage ACG-2014a isolate Syn7803C101, complete genome

1-tRNA-Val(tac)[13064,13135]  
ggcggaataactcagcggtagagtgctcctttacacggagattgtcggg  
ggttcgatcccctcttcgcca  
1-2tRNA-Leu(taa)[18054,18140]  
tggtgagtggtcggaatcggtagacgcaccagacttaaaatctgttgaga  
attaatctcgtgggggtcaagtccttctcccat  
1-3tRNA-Thr(tgt)[18764,18836]  
gcctccgtagctcagtggtagagcaggcctttgtaaagctcaggtcgca  
agttcaaatctgtcagaggctc  
1-4tRNA-Asn(gtt)[18841,18913]  
tcctctatagctcagttggtagagcagtgactgttaatcacctgtccc  
tggttcgagtcagggtggaggag  
1-5tRNA-Arg(tct)[154571,154646]  
tggtcagtagctcagatggatagagcaactgccttctaagcagtcggcc  
acaggttcgagtcctgtctgaccgt

>KJ019137.1 Synechococcus phage ACG-2014a isolate Syn7803C104, complete genome

1-tRNA-Val(tac)[13064,13135]  
ggcggaataactcagcggtagagtgctcctttacacggagattgtcggg  
ggttcgatcccctcttcgcca  
1-2tRNA-Leu(taa)[18149,18235]  
tggtgagtggtcggaatcggtagacgcaccagacttaaaatctgttgaga  
attaatctcgtgggggtcaagtccttctcccat  
1-3tRNA-Thr(tgt)[18859,18931]  
gcctccgtagctcagtggtagagcaggcctttgtaaagctcaggtcgca  
agttcaaatctgtcagaggctc  
1-4tRNA-Asn(gtt)[18936,19008]  
tcctctatagctcagttggtagagcagtgactgttaatcacctgtccc  
tggttcgagtcagggtggaggag  
1-5tRNA-Arg(tct)[154571,154646]  
tggtcagtagctcagatggatagagcaactgccttctaagcagtcggcc  
acaggttcgagtcctgtctgaccgt

>KJ019138.1 Synechococcus phage ACG-2014a isolate Syn7803C107, complete genome

1-tRNA-Val(tac)[13076,13147]  
ggcggaataactcagcggtagagtgctcctttacacggagattgtcggg  
ggttcgatcccctcttcgcca  
1-2tRNA-Leu(taa)[18066,18152]  
tggtgagtggtcggaatcggtagacgcaccagacttaaaatctgttgaga  
attaatctcgtgggggtcaagtccttctcccat  
1-3tRNA-Thr(tgt)[18776,18848]  
gcctccgtagctcagtggtagagcaggcctttgtaaagctcaggtcgca  
agttcaaatctgtcagaggctc

1-4tRNA-Asn(gtt)[18853,18925]  
tcctctatagctcagttggttagagcaggtgactgttaatcacccctgtccc  
tggttcgagtcagggtggaggag  
1-5tRNA-Arg(tct)[154577,154652]  
tgggtcagtagctcagatggatagagcaactgccttctaagcagtcggcc  
acaggttcgagtcctgtctgaccgt

>KJ019153.1 Synechococcus phage ACG-2014a isolate Syn7803C26, complete genome

1-1tRNA-Val(tac)[13064,13135]  
gggcgaataactcagcggtagagtgccctctttacacggagattgtcggg  
ggttcgatcccctcttcgcca  
1-2tRNA-Leu(taa)[18054,18140]  
tgggagtggtggcgaatcggtagacgcaccagacttaaaatctgttgaga  
attaatctcgtgggggtcaagtccttctcccat  
1-3tRNA-Thr(tgt)[18764,18836]  
gcctccgtagctcagtggttagagcagggtttgtaaagtcaggtcgca  
agttcaaatctgtcagaggctc  
1-4tRNA-Asn(gtt)[18841,18913]  
tcctctatagctcagttggttagagcaggtgactgttaatcacccctgtccc  
tggttcgagtcagggtggaggag  
1-5tRNA-Arg(tct)[154448,154523]  
tgggtcagtagctcagatggatagagcaactgccttctaagcagtcggcc  
acaggttcgagtcctgtctgaccgt

>KJ019157.1 Synechococcus phage ACG-2014a isolate Syn7803C31, complete genome

1-1tRNA-Val(tac)[13159,13230]  
gggcgaataactcagcggtagagtgccctctttacacggagattgtcggg  
ggttcgatcccctcttcgcca  
1-2tRNA-Leu(taa)[18149,18235]  
tgggagtggtggcgaatcggtagacgcaccagacttaaaatctgttgaga  
attaatctcgtgggggtcaagtccttctcccat  
1-3tRNA-Thr(tgt)[18859,18931]  
gcctccgtagctcagtggttagagcagggtttgtaaagtcaggtcgca  
agttcaaatctgtcagaggctc  
1-4tRNA-Asn(gtt)[18936,19008]  
tcctctatagctcagttggttagagcaggtgactgttaatcacccctgtccc  
tggttcgagtcagggtggaggag  
1-5tRNA-Arg(tct)[154574,154649]  
tgggtcagtagctcagatggatagagcaactgccttctaagcagtcggcc  
acaggttcgagtcctgtctgaccgt

>KJ019163.1 Synechococcus phage ACG-2014a isolate Syn7803C38, complete genome

1-1tRNA-Val(tac)[13064,13135]  
gggcgaataactcagcggtagagtgccctctttacacggagattgtcggg  
ggttcgatcccctcttcgcca  
1-2tRNA-Leu(taa)[18054,18140]  
tgggagtggtggcgaatcggtagacgcaccagacttaaaatctgttgaga

attaatctcgtgggggtcaagtcaccttctccat  
1-3tRNA-Thr(tgt)[18764,18836]  
gcctccgtagctcagtggttagagcagggtttgtaaagctcaggtcgca  
agttcaaatctgtcagaggctc  
1-4tRNA-Asn(gtt)[18841,18913]  
tcctctatagctcagttggttagagcaggtgactgttaatcacctgtccc  
tggttcgagtcaggtggaggag  
1-5tRNA-Arg(tct)[154470,154545]  
tgggtcagtagctcagatggatagagcaactgccttctaagcagtcggcc  
acaggttcgagtcctgtctgacctgt

>KJ019040.1 Synechococcus phage ACG-2014b isolate Syn7803C61, complete genome

1-1tRNA-Thr(tgt)[13058,13130]  
gcctccgtagctcagtggttagagcagggtttgtaaagctcaggtcgca  
agttcaaatctgtcagaggctc  
1-2tRNA-Asn(gtt)[13135,13207]  
tcctctatagctcagttggttagagcaggtgactgttaatcacctgtccc  
tggttcgagtcaggtggaggag  
1-3tRNA-Val(tac)[13210,13281]  
gggcgaataactcagcggtagagtgacctctttacacggagattgtcggg  
ggttcgatcccctcttcgcca  
1-4tRNA-Leu(taa)[18645,18731]  
tgggagtggtggcgaatcggttagacgcaccagacttaaaatctgttgaga  
attaatctcgtgggggtcaagtcacctcctat  
1-5tRNA-Arg(tct)[137804,137878]  
tgggtcagtagctcagcggatagagcatgcacttctaatacggttggtcg  
caggttcgatccctgcctgacctgt

>KJ019041.1 Synechococcus phage ACG-2014b isolate Syn7803C66, complete genome

1-1tRNA-Thr(tgt)[13046,13118]  
gcctccgtagctcagtggttagagcagggtttgtaaagctcaggtcgca  
agttcaaatctgtcagaggctc  
1-2tRNA-Asn(gtt)[13123,13195]  
tcctctatagctcagttggttagagcaggtgactgttaatcacctgtccc  
tggttcgagtcaggtggaggag  
1-3tRNA-Val(tac)[13198,13269]  
gggcgaataactcagcggtagagtgacctctttacacggagattgtcggg  
ggttcgatcccctcttcgcca  
1-4tRNA-Leu(taa)[18633,18719]  
tgggagtggtggcgaatcggttagacgcaccagacttaaaatctgttgaga  
attaatctcgtgggggtcaagtcacctcctat  
1-5tRNA-Arg(tct)[155616,155690]  
tgggtcagtagctcagcggatagagcatgcacttctaatacggttggtcg  
caggttcgatccctgcctgacctgt

>KJ019042.1 Synechococcus phage ACG-2014b isolate Syn7803C67, complete genome

1-1tRNA-Thr(tgt)[13058,13130]

gcctccgtagctcagtggttagagcaggcctttgtaaagctcaggtcgca  
agttcaaattctgtcagaggctc  
1-2tRNA-Asn(gtt)[13135,13207]  
tcctctatagctcagttggttagagcaggtgactgttaatcacctgtccc  
tggttcgagtcagggtggaggag  
1-3tRNA-Val(tac)[13210,13281]  
gggcgaataactcagcggtagagtgccctctttacacggagattgtcggg  
ggttcgatcccctcttcgcca  
1-4tRNA-Leu(taa)[18645,18731]  
tgggagtggtggcgaatcggtagacgcaccagactaaaatctgttgaga  
attaatctcgtgggggtcaagtcacccccactcctat  
1-5tRNA-Arg(tct)[155500,155574]  
tgggtcagtagctcagcggatagagcatgcacttctaatacggttggtcg  
caggttcgatccctgcctgacccgt

>KJ019043.1 Synechococcus phage ACG-2014b isolate Syn7803C68, complete genome

1-1tRNA-Thr(tgt)[13058,13130]  
gcctccgtagctcagtggttagagcaggcctttgtaaagctcaggtcgca  
agttcaaattctgtcagaggctc  
1-2tRNA-Asn(gtt)[13135,13207]  
tcctctatagctcagttggttagagcaggtgactgttaatcacctgtccc  
tggttcgagtcagggtggaggag  
1-3tRNA-Val(tac)[13210,13281]  
gggcgaataactcagcggtagagtgccctctttacacggagattgtcggg  
ggttcgatcccctcttcgcca  
1-4tRNA-Leu(taa)[18645,18731]  
tgggagtggtggcgaatcggtagacgcaccagactaaaatctgttgaga  
attaatctcgtgggggtcaagtcacccccactcctat  
1-5tRNA-Arg(tct)[155502,155576]  
tgggtcagtagctcagcggatagagcatgcacttctaatacggttggtcg  
caggttcgatccctgcctgacccgt

>KJ019044.1 Synechococcus phage ACG-2014b isolate Syn7803C69, complete genome

1-1tRNA-Thr(tgt)[13058,13130]  
gcctccgtagctcagtggttagagcaggcctttgtaaagctcaggtcgca  
agttcaaattctgtcagaggctc  
1-2tRNA-Asn(gtt)[13135,13207]  
tcctctatagctcagttggttagagcaggtgactgttaatcacctgtccc  
tggttcgagtcagggtggaggag  
1-3tRNA-Val(tac)[13210,13281]  
gggcgaataactcagcggtagagtgccctctttacacggagattgtcggg  
ggttcgatcccctcttcgcca  
1-4tRNA-Leu(taa)[18733,18819]  
tgggagtggtggcgaatcggtagacgcaccagactaaaatctgttgaga  
attaatctcgtgggggtcaagtcacccccactcctat  
1-5tRNA-Arg(tct)[155495,155569]

tgggtcagtagctcagcggatagagcatcgacttctaatacggttggtcg  
caggttcgatccctgcctgacccgt

>KJ019049.1 Synechococcus phage ACG-2014b isolate Syn7803C76, complete genome

1-1tRNA-Thr(tgt)[13058,13130]  
gcctccgtagctcagtggttagagcaggcctttgtaaagctcaggtcgca  
agttcaaatcttgcagaggctc  
1-2tRNA-Asn(gtt)[13135,13207]  
tcctctatagctcagttggttagagcaggtgactgttaatcacctgtccc  
tggttcgagtcaggaggag  
1-3tRNA-Val(tac)[13210,13281]  
gggcgaataactcagcggtagagtgctcctttacacggagattgtcggg  
ggttcgatcccctcttcgcca  
1-4tRNA-Leu(taa)[18645,18731]  
tgggagtggtgcggaatcggtagacgcaccagactaaaatctgttgaga  
attaatctcgtgggggtcaagtcccccactcctat  
1-5tRNA-Arg(tct)[155502,155576]  
tgggtcagtagctcagcggatagagcatcgacttctaatacggttggtcg  
caggttcgatccctgcctgacccgt

>KJ019051.1 Synechococcus phage ACG-2014b isolate Syn7803C78, complete genome

1-1tRNA-Thr(tgt)[13058,13130]  
gcctccgtagctcagtggttagagcaggcctttgtaaagctcaggtcgca  
agttcaaatcttgcagaggctc  
1-2tRNA-Asn(gtt)[13135,13207]  
tcctctatagctcagttggttagagcaggtgactgttaatcacctgtccc  
tggttcgagtcaggaggag  
1-3tRNA-Val(tac)[13210,13281]  
gggcgaataactcagcggtagagtgctcctttacacggagattgtcggg  
ggttcgatcccctcttcgcca  
1-4tRNA-Leu(taa)[18645,18731]  
tgggagtggtgcggaatcggtagacgcaccagactaaaatctgttgaga  
attaatctcgtgggggtcaagtcccccactcctat  
1-5tRNA-Arg(tct)[155502,155576]  
tgggtcagtagctcagcggatagagcatcgacttctaatacggttggtcg  
caggttcgatccctgcctgacccgt

>KJ019060.1 Synechococcus phage ACG-2014b isolate Syn7803C91, complete genome

1-1tRNA-Thr(tgt)[13058,13130]  
gcctccgtagctcagtggttagagcaggcctttgtaaagctcaggtcgca  
agttcaaatcttgcagaggctc  
1-2tRNA-Asn(gtt)[13135,13207]  
tcctctatagctcagttggttagagcaggtgactgttaatcacctgtccc  
tggttcgagtcaggaggag  
1-3tRNA-Val(tac)[13210,13281]  
gggcgaataactcagcggtagagtgctcctttacacggagattgtcggg  
ggttcgatcccctcttcgcca

1-4tRNA-Leu(taa)[18645,18731]  
tgggagtggtggcggaatcggtagacgcaccagacttaaaatctgttgaga  
attaatctcgtgggggttcaagtcacccactcctat  
1-5tRNA-Arg(tct)[155502,155576]  
tgggtcagtagctcagcggatagagcatcgacttctaatacggttggtcg  
caggttcgatccctgcctgacccgt

>KJ019061.1 Synechococcus phage ACG-2014b isolate Syn7803C92, complete genome

1-1tRNA-Thr(tgt)[13058,13130]  
gcctccgtagctcagtggttagagcagggtttgttaaagctcaggtcgca  
agttcaaatctgtcagaggctc  
1-2tRNA-Asn(gtt)[13135,13207]  
tcctctatagctcagttggttagagcaggtgactgttaatcacccgtgcc  
tgggtcagtcaggtggaggag  
1-3tRNA-Val(tac)[13210,13281]  
gggcgaataactcagcggtagagtgctcctttacacggagattgtcggg  
ggttcgatccctcttcgcca

1-4tRNA-Leu(taa)[18645,18731]  
tgggagtggtggcggaatcggtagacgcaccagacttaaaatctgttgaga  
attaatctcgtgggggttcaagtcacccactcctat  
1-5tRNA-Arg(tct)[155505,155579]  
tgggtcagtagctcagcggatagagcatcgacttctaatacggttggtcg  
caggttcgatccctgcctgacccgt

>KJ019104.1 Synechococcus phage ACG-2014b isolate Syn7803US49, complete genome

1-1tRNA-Thr(tgt)[13058,13130]  
gcctccgtagctcagtggttagagcagggtttgttaaagctcaggtcgca  
agttcaaatctgtcagaggctc  
1-2tRNA-Asn(gtt)[13135,13207]  
tcctctatagctcagttggttagagcaggtgactgttaatcacccgtgcc  
tgggtcagtcaggtggaggag  
1-3tRNA-Val(tac)[13210,13281]  
gggcgaataactcagcggtagagtgctcctttacacggagattgtcggg  
ggttcgatccctcttcgcca

1-4tRNA-Leu(taa)[18645,18731]  
tgggagtggtggcggaatcggtagacgcaccagacttaaaatctgttgaga  
attaatctcgtgggggttcaagtcacccactcctat  
1-5tRNA-Arg(tct)[155502,155576]  
tgggtcagtagctcagcggatagagcatcgacttctaatacggttggtcg  
caggttcgatccctgcctgacccgt

>KJ019108.1 Synechococcus phage ACG-2014b isolate Syn7803US53, complete genome

1-1tRNA-Thr(tgt)[13058,13130]  
gcctccgtagctcagtggttagagcagggtttgttaaagctcaggtcgca  
agttcaaatctgtcagaggctc  
1-2tRNA-Asn(gtt)[13135,13207]  
tcctctatagctcagttggttagagcaggtgactgttaatcacccgtgcc



tggttcgagtcaggaggag  
1-3tRNA-Val(tac)[13210,13281]  
gggcgaataactcagcgtagagtgctcctttacacggagattgtcggg  
ggttcgatcccctcttcgcca  
1-4tRNA-Leu(taa)[18645,18731]  
tgggagtggtggcggaatcggtagacgcaccagactaaaatctgttgaga  
attaatctcgtgggggtcaagtcacccactcctat  
1-5tRNA-Arg(tct)[155407,155481]  
tgggtcagtagctcagcggatagagcatcgacttctaatacggttggtcg  
caggttcgatccctgcctgacccgt

>KJ019109.1 Synechococcus phage ACG-2014b isolate Syn7803US54, complete genome

1-1tRNA-Thr(tgt)[13058,13130]  
gcctccgtagctcagtggtagagcaggcctttgtaaagtcaggtcgca  
agttcaaatctgtcagaggctc  
1-2tRNA-Asn(gtt)[13135,13207]  
tcctctatagctcagttggtagagcaggtgactgttaatcacccgtccc  
tggttcgagtcaggaggag  
1-3tRNA-Val(tac)[13210,13281]  
gggcgaataactcagcgtagagtgctcctttacacggagattgtcggg  
ggttcgatcccctcttcgcca  
1-4tRNA-Leu(taa)[18645,18731]  
tgggagtggtggcggaatcggtagacgcaccagactaaaatctgttgaga  
attaatctcgtgggggtcaagtcacccactcctat  
1-5tRNA-Arg(tct)[155502,155576]  
tgggtcagtagctcagcggatagagcatcgacttctaatacggttggtcg  
caggttcgatccctgcctgacccgt

>KJ019110.1 Synechococcus phage ACG-2014b isolate Syn7803US56, complete genome

1-1tRNA-Thr(tgt)[13153,13225]  
gcctccgtagctcagtggtagagcaggcctttgtaaagtcaggtcgca  
agttcaaatctgtcagaggctc  
1-2tRNA-Asn(gtt)[13230,13302]  
tcctctatagctcagttggtagagcaggtgactgttaatcacccgtccc  
tggttcgagtcaggaggag  
1-3tRNA-Val(tac)[13305,13376]  
gggcgaataactcagcgtagagtgctcctttacacggagattgtcggg  
ggttcgatcccctcttcgcca  
1-4tRNA-Leu(taa)[18740,18826]  
tgggagtggtggcggaatcggtagacgcaccagactaaaatctgttgaga  
attaatctcgtgggggtcaagtcacccactcctat  
1-5tRNA-Arg(tct)[155502,155576]  
tgggtcagtagctcagcggatagagcatcgacttctaatacggttggtcg  
caggttcgatccctgcctgacccgt

>KJ019132.1 Synechococcus phage ACG-2014b isolate Syn9311C1, complete genome

1-1tRNA-Thr(tgt)[13058,13130]

gcctccgtagctcagtggtagagcagggtttgtaaagctcaggtcgca  
agttcaaattctgtcagaggctc  
1-2tRNA-Asn(gtt)[13135,13207]  
tcctctatagctcagttggtagagcaggtgactgttaatcacctgtccc  
tgggtcagtcagggtggaggag  
1-3tRNA-Val(tac)[13210,13281]  
gggcgaataactcagcggtagagtgctcctttacacggagattgtcggg  
ggttcgatcccctcttcgcca  
1-4tRNA-Leu(taa)[18645,18731]  
tgggagtggtggcgaatcggtagacgcaccagactaaaatctgttgaga  
attaatctcgtgggggtcaagtcacccactcctat  
1-5tRNA-Arg(tct)[155075,155149]  
tgggtcagtagctcagcggatagagcatgcacttctaatacggttggtcg  
caggttcgatccctgcctgaccgt

>KJ019133.1 Synechococcus phage ACG-2014b isolate Syn9311C4, complete genome

1-1tRNA-Thr(tgt)[13058,13130]  
gcctccgtagctcagtggtagagcagggtttgtaaagctcaggtcgca  
agttcaaattctgtcagaggctc  
1-2tRNA-Asn(gtt)[13135,13207]  
tcctctatagctcagttggtagagcaggtgactgttaatcacctgtccc  
tgggtcagtcagggtggaggag  
1-3tRNA-Val(tac)[13210,13281]  
gggcgaataactcagcggtagagtgctcctttacacggagattgtcggg  
ggttcgatcccctcttcgcca  
1-4tRNA-Leu(taa)[18645,18731]  
tgggagtggtggcgaatcggtagacgcaccagactaaaatctgttgaga  
attaatctcgtgggggtcaagtcacccactcctat  
1-5tRNA-Arg(tct)[155688,155762]  
tgggtcagtagctcagcggatagagcatgcacttctaatacggttggtcg  
caggttcgatccctgcctgaccgt

>KJ019154.1 Synechococcus phage ACG-2014b isolate Syn7803C28, complete genome

1-1tRNA-Thr(tgt)[13058,13130]  
gcctccgtagctcagtggtagagcagggtttgtaaagctcaggtcgca  
agttcaaattctgtcagaggctc  
1-2tRNA-Asn(gtt)[13135,13207]  
tcctctatagctcagttggtagagcaggtgactgttaatcacctgtccc  
tgggtcagtcagggtggaggag  
1-3tRNA-Val(tac)[13210,13281]  
gggcgaataactcagcggtagagtgctcctttacacggagattgtcggg  
ggttcgatcccctcttcgcca  
1-4tRNA-Leu(taa)[18645,18731]  
tgggagtggtggcgaatcggtagacgcaccagactaaaatctgttgaga  
attaatctcgtgggggtcaagtcacccactcctat  
1-5tRNA-Arg(tct)[155495,155569]

tgggtcagtagctcagcggatagagcatcgacttctaatacggttggtcg  
caggttcgatccctgcctgacccgt

>KJ019161.1 Synechococcus phage ACG-2014b isolate Syn7803C36, complete genome

1-1tRNA-Thr(tgt)[13058,13130]  
gcctccgtagctcagtgtagagcaggcctttgtaaagctcaggtcgca  
agttcaaatctgtcagaggctc  
1-2tRNA-Asn(gtt)[13135,13207]  
tcctctatagctcagttgtagagcaggtgactgttaatcacccgtccc  
tgggtcagagtcaggaggag  
1-3tRNA-Val(tac)[13210,13281]  
ggcggaataactcagcggtagagtcctcctttacacggagattgcggg  
ggttcgatcccctcttcgcca  
1-4tRNA-Leu(taa)[18645,18731]  
tgggagtggtgcggaatcggtagacgcaccagactaaaatctgtgaga  
attaatctcgtgggggtcaagtcacccactcctat  
1-5tRNA-Arg(tct)[155498,155572]  
tgggtcagtagctcagcggatagagcatcgacttctaatacggttggtcg  
caggttcgatccctgcctgacccgt

>FR852584.1 Staphylococcus phage ISP complete genome

1-1tRNA-Met(cat)c[110656,110727]  
ggactcttagcttaaaggtaaagccaaccgctcataacggttgactgta  
ggttcgaatcctgcagagtcca  
1-2tRNA-Trp(cca)c[133874,133945]  
acacccttagtataattagtagtacaagggtcctccaaacccttagtctt  
tgtgcaaatcaaagagggtgtg  
1-3tRNA-Phe(gaa)c[133952,134024]  
ggtttcttagctcagatggtagagcactagattgaagctctaggtgtcat  
tgggtcaaatccaatagaaacca  
1-4tRNA-Asp(gtc)c[134030,134105]  
tggctcattggtgtaactggttaacacactgccctgtcacggcagagagt  
acgagttcagctctcgatgggtcgt

>JX875065.1 Staphylococcus phage SA5, complete genome

1-1tRNA-Asp(gtc)[33538,33613]  
tggctcattggtgtaactggttaacacactgccctgtcacggcagagagt  
acgagttcagctctcgatgggtcgt  
1-2tRNA-Phe(gaa)[33619,33691]  
ggtttcttagctcagatggtagagcactagattgaagctctaggtgtcat  
tgggtcaaatccaatagaaacca  
1-3tRNA-Trp(cca)[33698,33769]  
acacccttagtataattagtagtacaagggtctccaaacccttagtctt  
tgtgcaaatcaaagagggtgtg  
1-4tRNA-Met(cat)[56903,56974]  
ggactcttagcttaaaggtaaagccaaccgctcataacggttgactgta  
ggttcgaatcctgcagagtcca

>JX080300.2 Staphylococcus phage Staph1N, complete genome

1-1tRNA-Met(cat)c[14198,14269]  
ggactcttagcttaaaggtaaagccaaccgctcataacggtttgactgta  
ggttcgaatcctgcagagtcca  
1-2tRNA-Trp(cca)c[37417,37488]  
acacccttagtataattagtagtacaagggtctccaaaacccttagtctt  
tgtgcaaatcaaagagggtgtg  
1-3tRNA-Phe(gaa)c[37495,37567]  
ggtttcttagctcagatggtagagcactagattgaagctctaggtgtcat  
tggttcaaatccaatagaaacca  
1-4tRNA-Asp(gtc)c[37573,37648]  
tggctcattggtgtaactggtaacacactgccctgtcacggcagagagt  
acgagttcgagtcctgtatgggtcgt

>JX080301.2 Staphylococcus phage A3R, complete genome

1-1tRNA-Met(cat)c[14073,14144]  
ggactcttagcttaaaggtaaagccaaccgctcataacggtttgactgta  
ggttcgaatcctgcagagtcca  
1-2tRNA-Trp(cca)c[37292,37363]  
acacccttagtataattagtagtacaagggtctccaaaacccttagtctt  
tgtgcaaatcaaagagggtgtg  
1-3tRNA-Phe(gaa)c[37370,37442]  
ggtttcttagctcagatggtagagcactagattgaagctctaggtgtcat  
tggttcaaatccaatagaaacca  
1-4tRNA-Asp(gtc)c[37448,37523]  
tggctcattggtgtaactggtaacacactgccctgtcacggcagagagt  
acgagttcgagtcctgtatgggtcgt

>JX080302.2 Staphylococcus phage 676Z, complete genome

1-1tRNA-Met(cat)c[15120,15191]  
ggactcttagcttaaaggtaaagccaaccgctcataacggtttgactgta  
ggttcgaatcctgcagagtcca  
1-2tRNA-Trp(cca)c[38339,38410]  
acacccttagtataattagtagtacaagggtctccaaaacccttagtctt  
tgtgcaaatcaaagagggtgtg  
1-3tRNA-Phe(gaa)c[38417,38489]  
ggtttcttagctcagatggtagagcactagattgaagctctaggtgtcat  
tggttcaaatccaatagaaacca  
1-4tRNA-Asp(gtc)c[38495,38570]  
tggctcattggtgtaactggtaacacactgccctgtcacggcagagagt  
acgagttcgagtcctgtatgggtcgt

>JX080303.2 Staphylococcus phage Fi200W, complete genome

1-1tRNA-Met(cat)c[15079,15150]  
ggactcttagcttaaaggtaaagccaaccgctcataacggtttgactgta  
ggttcgaatcctgcagagtcca  
1-2tRNA-Trp(cca)c[38295,38366]

acacccttagtataattagtagtacaagggtctccaaaacccttagtctt  
tgtgcaaatcaaagagggtgtg  
1-3tRNA-Phe(gaa)c[38373,38445]  
ggtttcttagctcagatggtagagcactagattgaagctctaggtgtcat  
tggttcaaatccaatagaaacca  
1-4tRNA-Asp(gtc)c[38451,38526]  
tggctcattggtgtaactggtaacacactgccctgtcacggcagagagt  
acgagttcgagtcctgtatgggtcgt

>JX080304.2 Staphylococcus phage MSA6, complete genome

1-1tRNA-Met(cat)c[14722,14793]  
ggactcttagcttaaaggtaaagccaaccgctcataacggtttgactgta  
ggttcgaatcctgcagagtcca  
1-2tRNA-Trp(cca)c[37937,38008]  
acacccttagtataattagtagtacaagggtctccaaaacccttagtctt  
tgtgcaaatcaaagagggtgtg  
1-3tRNA-Phe(gaa)c[38015,38087]  
ggtttcttagctcagatggtagagcactagattgaagctctaggtgtcat  
tggttcaaatccaatagaaacca  
1-4tRNA-Asp(gtc)c[38093,38168]  
tggctcattggtgtaactggtaacacactgccctgtcacggcagagagt  
acgagttcgagtcctgtatgggtcgt

>JX080305.2 Staphylococcus phage P4W, complete genome

1-1tRNA-Met(cat)c[14181,14252]  
ggactcttagcttaaaggtaaagccaaccgctcataacggtttgactgta  
ggttcgaatcctgcagagtcca  
1-2tRNA-Trp(cca)c[37397,37468]  
acacccttagtataattagtagtacaagggtctccaaaacccttagtctt  
tgtgcaaatcaaagagggtgtg  
1-3tRNA-Phe(gaa)c[37475,37547]  
ggtttcttagctcagatggtagagcactagattgaagctctaggtgtcat  
tggttcaaatccaatagaaacca  
1-4tRNA-Asp(gtc)c[37553,37628]  
tggctcattggtgtaactggtaacacactgccctgtcacggcagagagt  
acgagttcgagtcctgtatgggtcgt

>EU418428.2 Staphylococcus phage A5W, complete genome

1-1tRNA-Met(cat)c[14198,14269]  
ggactcttagcttaaaggtaaagccaaccgctcataacggtttgactgta  
ggttcgaatcctgcagagtcca  
1-2tRNA-Trp(cca)c[37420,37491]  
acacccttagtataattagtagtacaagggtctccaaaacccttagtctt  
tgtgcaaatcaaagagggtgtg  
1-3tRNA-Phe(gaa)c[37498,37570]  
ggtttcttagctcagatggtagagcactagattgaagctctaggtgtcat  
tggttcaaatccaatagaaacca

1-4tRNA-Asp(gtc)c[37576,37651]  
 tggctcattggtgtaactggtaacacactgccctgtcacggcagagagt  
 acgagttcgagtcctgtatgggtcgt  
 >KP687431.1 Staphylococcus phage IME-SA1, complete genome  
 1-1tRNA-Trp(cca)c[10772,10843]  
 acacccttagtataattagtagtacaagggtctccaaacccttagtctt  
 tgtgcaaatcaaagagggtgtg  
 1-2tRNA-Phe(gaa)c[10850,10922]  
 ggtttcttagctcagatggtagagcactagattgaagctctaggtgtcat  
 tggttcaaatccaatagaaacca  
 1-3tRNA-Asp(gtc)c[10928,11003]  
 tggctcattggtgtaactggtaacacactgccctgtcacggcagagagt  
 acgagttcgagtcctgtatgggtcgt  
 1-4tRNA-Met(cat)c[127774,127845]  
 ggactcttagcttaaaggtaaagccaaccgctcataacggttgactgta  
 gggtcgaatcctgcagagtcca  
 >KP687432.1 Staphylococcus phage IME-SA2, complete genome  
 1-1tRNA-Met(cat)c[5906,5977]  
 ggactcttagcttaaaggtaaagccaaccgctcataacggttgactgta  
 gggtcgaatcctgcagagtcca  
 1-2tRNA-Trp(cca)c[29115,29186]  
 acacccttagtataattagtagtacaagggtctccaaacccttagtctt  
 tgtgcaaatcaaagagggtgtg  
 1-3tRNA-Phe(gaa)c[29193,29265]  
 ggtttcttagctcagatggtagagcactagattgaagctctaggtgtcat  
 tggttcaaatccaatagaaacca  
 1-4tRNA-Asp(gtc)c[29271,29346]  
 tggctcattggtgtaactggtaacacactgccctgtcacggcagagagt  
 acgagttcgagtcctgtatgggtcgt  
 >KR902361.1 Staphylococcus phage IME-SA118, complete genome  
 1-1tRNA-Met(cat)c[20652,20723]  
 ggactcttagcttaaaggtaaagccaaccgctcataacggttgactgta  
 gggtcgaatcctgcagagtcca  
 1-2tRNA-Trp(cca)c[43866,43937]  
 acacccttagtataattagtagtacaagggtctccaaacccttagtctt  
 tgtgcaaatcaaagagggtgtg  
 1-3tRNA-Phe(gaa)c[43944,44016]  
 ggtttcttagctcagatggtagagcactagattgaagctctaggtgtcat  
 tggttcaaatccaatagaaacca  
 1-4tRNA-Asp(gtc)c[44022,44097]  
 tggctcattggtgtaactggtaacacactgccctgtcacggcagagagt  
 acgagttcgagtcctgtatgggtcgt  
 >KR908644.1 Staphylococcus phage IME-SA119, complete genome  
 1-1tRNA-Asp(gtc)[7628,7703]

tggtcattgggtgtaactggtaacacactgccctgtcacggcagagagt  
acgagttcaggtctcgtatgggtcgt  
1-2tRNA-Phe(gaa)[7709,7781]  
ggtttcttagctcagatggtagacactagattgaagctctaggtgtcat  
tggttcaaatccaatagaaacca  
1-3tRNA-Trp(cca)[7788,7859]  
acacccttagtataattagtagtacaagggtctccaaaacccttagtctt  
tgtgcaaatcaaagagggtgtg  
1-4tRNA-Met(cat)[31005,31076]  
ggactcttagcttaaaggtaaagccaaccgctcataacggttgactgta  
ggttcgaatcctgcagagtcca

>KX349285.1 Synechococcus phage S-RIM8 isolate RW\_01\_0212\_WH8101, complete genome

1-1tRNA-Gly(tcc)[13712,13786]  
gcggatgtaattcagtggtagaatgtcagcctccaagctgaacgtcagg  
ggttcagagtccttatccgctcca  
1-2tRNA-Val(tac)[13787,13858]  
gggcgattaactcagcggtagagtgccctggttacaccgagtatgtcggg  
ggttcgaatccctcatcgcca  
1-3tRNA-Leu(taa)[18353,18438]  
tgggacggtggcggaatcggtagacgcaccagactaaaatctgtgggc  
aatagcccgtgagagttcaagtctctctgctctat  
1-4tRNA-Thr(tgt)[19094,19170]  
gcctccgtagctcagctggatagagcaacggtttgtaaaccgtaggtcg  
tcggttcaagtccgacctggggtcca  
1-5tRNA-Ala(tgc)[19171,19243]  
ggggaattagctcagttggtagagcgctcttgcaagcaggatgtcag  
cggttcagtcgctattctcca  
1-6tRNA-Asn(gti)[19268,19342]  
ttcctctatagctcagtcggtagagcgttgactgttaatcaaaatgtcc  
ctggttcgagcccaggtggaggagt  
1-7tRNA-Arg(tct)[157166,157241]  
tgggtcagtagctcagttggatagagcaactgccttctaagcagtcggtc  
acaggttcgagtcctgtctgacctgt  
1-8tRNA-Pro(tgg)[158249,158323]  
cgggggtgtagcgagcttggtagcgcggttgctttgggagcaataggtcg  
caggttcgaatcctgtcaccggac

>KX349286.1 Synechococcus phage S-RIM8 isolate RW\_03\_0807\_WH8101, complete genome

1-1tRNA-Gly(tcc)[13707,13781]  
gcggatgtaattcagtggtagaatgtcagcctccaagctgaacgtcagg  
ggttcagagtccttatccgctcca  
1-2tRNA-Val(tac)[13782,13853]  
gggcgattaactcagtggtagagtgccctggttacaccgagtatgtcggg  
ggttcgaatccctcatcgcca  
1-3tRNA-Leu(taa)[18348,18433]

tgggacgggtggcggaaatcggtagacgcaccagacttaaaatctgttgggc  
aatagccccgtgagagttcaagtctctctgcctat  
1-4tRNA-Thr(tgt)[19089,19162]  
gcctccgtagctcagctggatagagcaacggttttaaaccgtaggtcg  
tcggttcaagtccgaccgtgggct  
1-6tRNA-Ala(tgc)[19490,19564]  
tggggaattagctcagttggtagagcgctgttgaagcaggatgtca  
gcggttcgagtcgcctattctccat  
1-7tRNA-Asn(gtt)[19588,19662]  
ttcctctatagctcagtcggtagagcggttgactgttaatacaaatgtcc  
ctggttcgagcccaggtggaggagt  
1-8tRNA-Arg(tct)[155937,156012]  
tgggtcagtagctcagttggatagagcaactgccttctaagcagtcggtc  
acaggttcgagtcctgtctgaccgt  
1-9tRNA-Pro(tgg)[157020,157094]  
cggggtgtagcgagcttggtagcgcggttgcttgggagcaataggtcg  
caggttcgaatcctgtcaccgccgac

>KX349287.1 Synechococcus phage S-RIM8 isolate RW\_06\_0613, complete genome

1-1tRNA-Gly(tcc)[13701,13775]  
gcggatgtaattcagtggtagaatgtcagcctccaagctgaacgtcagg  
ggttcgagtccttatccgctcca  
1-2tRNA-Val(tac)[13776,13847]  
gggcgattaactcagcggtagagtcctcgttacaccgagtatgtcggg  
ggttcgaatccctcatcgcca  
1-3tRNA-Leu(taa)[18342,18427]  
tgggacgggtggcggaaatcggtagacgcaccagacttaaaatctgttgggc  
aatagccccgtgagagttcaagtctctctgcctat  
1-4tRNA-Thr(tgt)[19083,19159]  
gcctccgtagctcagctggatagagcaacggttttaaaccgtaggtcg  
tcggttcaagtccgaccgtgggtcca  
1-5tRNA-Ala(tgc)[19160,19232]  
ggggaattagctcagttggtagagcgctgttgaagcaggatgtcag  
cgggttcgagtcgcctattctcca  
1-6tRNA-Asn(gtt)[19257,19331]  
ttcctctatagctcagtcggtagagcggttgactgttaatacaaatgtcc  
ctggttcgagcccaggtggaggagt  
1-7tRNA-Arg(tct)[156851,156926]  
tgggtcagtagctcagttggatagagcaactgccttctaagcagtcggtc  
acaggttcgagtcctgtctgaccgt  
1-8tRNA-Pro(tgg)[157934,158008]  
cggggtgtagcgagcttggtagcgcggttgcttgggagcaataggtcg  
caggttcgaatcctgtcaccgccgac

>KX349288.1 Synechococcus phage S-RIM8 isolate RW\_08\_0711, complete genome

1-1tRNA-Gly(tcc)[13701,13775]



gcggatgtaattcagtggtagaatgtcagcctccaagctgaacgtcagg  
 ggttcgagtcacctatccgtcca  
 1-2tRNA-Val(tac)[13776,13847]  
 gggcgattaactcagcggtagagtgcctcgttacaccgagtatgtcggg  
 ggttcgaatccctcatcgcca  
 1-3tRNA-Leu(taa)[18342,18427]  
 tgggacggtggcggaatcggtagacgcaccagacttaaaatctgttgggc  
 aatagcccgtagaggtcaagtctctctgtcctat  
 1-4tRNA-Thr(tgt)[19083,19159]  
 gcctccgtagctcagctggatagagcaacggtttgtaaaccgtaggtcg  
 tcggttcaagtcgaccgtgggtcca  
 1-5tRNA-Ala(tgc)[19160,19232]  
 ggggaattagctcagttggtagagcgctgcttgcaagcaggatgtcag  
 cgggttcgagtcgctattctcca  
 1-6tRNA-Asn(gtt)[19257,19331]  
 ttctctatagctcagtcggtagagcggttgactgttaatcaaaatgtcc  
 ctggttcgagcccaggtggaggagt  
 1-7tRNA-Arg(tct)[156257,156332]  
 tgggtcagtagctcagttggatagagcaactgccttctaagcagtcggtc  
 acaggttcgagtcctgtctgacctgt  
 1-8tRNA-Pro(tgg)[157340,157414]  
 cggggtgtagcgcagcttggtagcgcggttgctttgggagcaataggtcg  
 caggttcgaatcctgtcaccccgac

>KX349289.1 Synechococcus phage S-RIM8 isolate RW\_22\_0300, complete genome

1-1tRNA-Gly(tcc)[13713,13787]  
 gcggatgtaattcagtggtagaatgtcagcctccaagctgaacgtcagg  
 ggttcgagtcacctatccgtcca  
 1-2tRNA-Val(tac)[13788,13859]  
 gggcgattaactcagcggtagagtgcctcgttacaccgagtatgtcggg  
 ggttcgaatccctcatcgcca  
 1-3tRNA-Leu(taa)[18356,18441]  
 tgggacggtggcggaatcggtagacgcaccagacttaaaatctgttgggc  
 aatagcccgtagaggtcaagtctctctgtcctat  
 1-4tRNA-Thr(tgt)[19097,19173]  
 gcctccgtagctcagctggatagagcaacggtttgtaaaccgtaggtcg  
 tcggttcaagtcgaccgtgggtcca  
 1-5tRNA-Ala(tgc)[19174,19246]  
 ggggaattagctcagttggtagagcgctgcttgcaagcaggatgtcag  
 cgggttcgagtcgctattctcca  
 1-6tRNA-Asn(gtt)[19271,19345]  
 ttctctatagctcagtcggtagagcggttgactgttaatcaaaatgtcc  
 ctggttcgagcccaggtggaggagt  
 1-7tRNA-Arg(tct)[156612,156687]  
 tgggtcagtagctcagttggatagagcaactgccttctaagcagtcggtc

acaggttcgagtcctgtctgaccgt  
1-8tRNA-Pro(tgg)[157695,157769]  
cggggttagcgcagcttggtagcgcggttgctttgggagcaataggtcg  
caggttcgaatcctgtcaccgccgac

>KX349290.1 Synechococcus phage S-RIM8 isolate RW\_25\_1112, complete genome

1-1tRNA-Gly(tcc)[13701,13775]  
gcggatgtaattcagtggtagaatgtcagcctccaagctgaacgtcagg  
ggttcgagtcacctatccgctcca  
1-2tRNA-Val(tac)[13776,13847]  
gggcgattaactcagcggtagagtgcctcgtttacaccgagtatgtcggg  
ggttcgaatccctcatcgcca  
1-3tRNA-Leu(taa)[18342,18427]  
tgggacggtggcggaatcggtagacgcaccagacttaaaatctgttgggc  
aatagcccgtagagttcaagtctctctgcctat  
1-4tRNA-Thr(tgt)[19083,19159]  
gcctccgtagctcagctggatagagcaacggtttgtaaacgtaggtcg  
tcggttcaagtccgacctgggctcca  
1-5tRNA-Ala(tgc)[19160,19232]  
ggggaattagctcagttggtagagcgctgctttgcaagcaggatgtcag  
cggttcgagtcgctattctcca  
1-6tRNA-Asn(gtt)[19257,19331]  
ttcctctatagctcagtcggtagagcgttgactgttaatcaaaatgtcc  
ctggttcgagcccaggtggaggagt  
1-7tRNA-Arg(tct)[156851,156926]  
tgggtcagtagctcagttggatagagcaactgccttctaagcagtcggtc  
acaggttcgagtcctgtctgaccgt  
1-8tRNA-Pro(tgg)[157934,158008]  
cggggttagcgcagcttggtagcgcggttgctttgggagcaataggtcg  
caggttcgaatcctgtcaccgccgac

>HQ317385.1 Synechococcus phage S-RIM8 A.HR5, complete genome

1-1tRNA-Gly(tcc)[13713,13787]  
gcggatgtaattcagtggtagaatgtcagcctccaagctgaacgtcagg  
ggttcgagtcacctatccgctcca  
1-2tRNA-Val(tac)[13788,13859]  
gggcgattaactcagcggtagagtgcctcgtttacaccgagtatgtcggg  
ggttcgaatccctcatcgcca  
1-3tRNA-Leu(taa)[18355,18440]  
tgggacggtggcggaatcggtagacgcaccagacttaaaatctgttgggc  
aatagcccgtagagttcaagtctctctgcctat  
1-4tRNA-Thr(tgt)[19096,19172]  
gcctccgtagctcagctggatagagcaacggtttgtaaacgtaggtcg  
tcggttcaagtccgacctgggctcca  
1-5tRNA-Ala(tgc)[19173,19245]  
ggggaattagctcagttggtagagcgctgctttgcaagcaggatgtcag

cggttcgagtcgctattctcca  
1-6tRNA-Asn(gtt)[19270,19344]  
ttcctctatagctcagtcggtagagcgttgactgttaatcaaaatgtcc  
ctggttcgagcccaggtggaggagt  
1-7tRNA-Arg(tct)[153724,153799]  
tgggtcagtagctcagttggatagagcaactgccttctaagcagtcggtc  
acaggttcgagtcctgtctgacctgt  
1-8tRNA-Pro(tgg)[154807,154881]  
cggggtgtagcgcagcttggtagcgcggttgctttgggagcaataggtcg  
caggttcgaatcctgtcaccgccgac

>JF974289.1 Synechococcus phage S-RIM8 A.HR3, complete genome

1-1tRNA-Gly(tcc)[13713,13787]  
gcggtatgtaattcagtggtagaatgtcagcctccaagctgaacgtcagg  
ggttcgagtcacctatccgctcca  
1-2tRNA-Val(tac)[13788,13859]  
gggcgattaactcagcggtagagtcctcgtttacaccgagtatgtcggg  
ggttcgaatccctcatcgccca  
1-3tRNA-Leu(taa)[18355,18440]  
tgggacggtggcggaatcggtagacgcaccagactaaaatctgttgggc  
aatagcccgtagaggtcaagtcctctcgtcctat  
1-4tRNA-Thr(tgt)[19096,19172]  
gcctccgtagctcagctggatagagcaacggtttgtaaaccgtaggtcg  
tcggttcaagtcgacctgggctcca  
1-5tRNA-Ala(tgc)[19173,19245]  
ggggaattagctcagttggtagagcgctgctttgcaagcaggatgtcag  
cggttcgagtcgctattctcca  
1-6tRNA-Asn(gtt)[19270,19344]  
ttcctctatagctcagtcggtagagcgttgactgttaatcaaaatgtcc  
ctggttcgagcccaggtggaggagt  
1-7tRNA-Arg(tct)[156607,156682]  
tgggtcagtagctcagttggatagagcaactgccttctaagcagtcggtc  
acaggttcgagtcctgtctgacctgt  
1-8tRNA-Pro(tgg)[157690,157764]  
cggggtgtagcgcagcttggtagcgcggttgctttgggagcaataggtcg  
caggttcgaatcctgtcaccgccgac

>JF974293.1 Cyanophage KBS-M-1A genomic sequence

1-1tRNA-Asn(gtt)c[26777,26851]  
ttcctctatagctcagtcggtagagcgttgactgttaatcaaaatgtcc  
ctggttcgagcccaggtggaggagt  
1-2tRNA-Ala(tgc)c[26876,26948]  
ggggaattagctcagttggtagagcgctgctttgcaagcaggatgtcag  
cggttcgagtcgctattctcca  
1-3tRNA-Thr(tgt)c[26949,27025]  
gcctccgtagctcagctggatagagcaacggtttgtaaaccgtaggtcg

tcggttcaagtcgaccgtgggtcca  
1-4tRNA-Leu(taa)c[27681,27766]  
tgggacggtggcggaatcggtagacgaccagacttaaatctgttgggc  
aatagcccgtagaggtcaagtctctctgcctat  
1-5tRNA-Val(tac)c[32262,32333]  
gggcgattaactcagcggtagagtgcctcgttacaccgagatgtcggg  
ggttcgaatccctcatcgcca  
1-6tRNA-Gly(tcc)c[32334,32408]  
gcggatgtaattcagtggtagaatgtcagcctccaagctgaacgtcagg  
ggttcgagtccttatccgctcca  
1-7tRNA-Pro(tgg)c[59568,59642]  
cggggtgtagcgcagcttgtagcgcggttgcttgggagcaataggtcg  
caggttcgaatcctgtcaccggac  
1-8tRNA-Arg(tct)c[60650,60725]  
tgggtcagtagctcagttggatagagcaactgccttctaagcagtcggtc  
acaggttcgagtcctgtctgaccgt

>JF704096.1 Mycobacterium phage Ghost, complete sequence

1-1tRNA-Ser(gct)[30462,30545]  
ggagggtgagcatcaggtgatgcagcgagattgctaattcccgtaggtaa  
ccaccccgtaggttcgaatcctcctccctccgc  
1-2tRNA-Leu(cag)[30738,30813]  
gctcccgtagcccaattggcaggaggcaccagattcaggatctgggcagt  
gtgagttcgaatctcaccgggagtag  
1-3tRNA-Leu(gag)[30933,31007]  
gtctctgtaggcaaatcgaaaagccgcatcttgagggggtggtgcgtg  
cgggttcgactcccgcagagacac  
1-4tRNA-Leu(caa)[31008,31081]  
gccgtggtaggccatctggcgagccgagttcaagtttcggtgtttgc  
gggttcgaatcccggccacggtac  
1-5tRNA-SeC(tca)[67487,67583]  
attctggcactggtggcgagcccaccggcgagcttcaagctgtcgt  
ggccggagaaccgaccggaacatcccggtcaacgcgacccagggcc  
1-6tRNA-Pro(tgg)[91444,91518]  
cggggtgtagttcagtttgaagagcgttggttgggaccaagatgtcg  
caggttcgaatcctgtcaccggac  
1-7tRNA-Trp(cca)[91533,91603]  
gggtctgtgcacagggtgcccagcgtctcaaagccgaaggcgggggtt  
cgattccctcaggcctgcca  
1-8tRNA-Tyr(gta)[91605,91691]  
cccgtagatgcccactggtgttgggagcaggctgaaatctgtgcct  
tcgggacggtgaggttcgattcctcagtcgggacca  
1-9tRNA-Pyl(cta)[92745,92818]  
tgcgagatcgtgcacggcgactaggagcttctaaccctccgactcgcgg  
gttcgactcccgcactctgcaccc

1-10tRNA-Met(cat)[92966,93040]  
agcgggtgtagagcagctaggtagctcgccgggctcataaaccggaggacg  
cgtgttcgattcacgccaccgccac  
1-11tRNA-Cys(gca)[93167,93238]  
gcgcctttggcggaatggctacgtgctcggtgcaacccgagttatcccg  
gttcgactccgggaggcgctc  
1-12tRNA-Glu(ctc)[93243,93317]  
ggtcggttgagtagatggacatctcgccaccctctcaagtgagatca  
cgggttcaagtcccgtacggactgc  
1-13tRNA-His(gtg)[93319,93392]  
gtggccgtagttcagccggtagaacgctgggttgtgatccagtcgtcga  
gggttcgagtcctccggtcaccc  
1-14tRNA-Ala(tgc)[93554,93628]  
gggcctgtagctccaattggtagagcagcatcctgcaagatgacggctg  
tcggttcgaatccgacctggtccac  
1-15tRNA-Phe(gaa)[93818,93890]  
gccgtcatagctcagttggtagagcactggcctgaaaaccagtggccga  
ggttcgattcctcgtgtcggcac  
1-16tRNA-Val(cac)[93896,93969]  
gtccgttagctcagctggaagagcgctcgggtccacaccgagaggccgc  
aggttcgatccctgcaatggacac  
1-17tRNA-Lys(ctt)[94088,94160]  
gccttcgtagctcagtggttagagctgtcgccctctaagcgataggtcgtt  
ggttcgaatccagccgggggcac  
1-18tRNA-Glu(ttc)[94165,94241]  
ggtcgggtcggtctgctggatggccagtcggatttctactccgacatt  
cgcgggttcaattcccgtcccgatcgc  
1-19tRNA-Gly(tcc)[94321,94393]  
gcgggtgtggccgaatggctcaggcaccagattccactctggctacgca  
ggttcgattcctgtcatccgctc  
1-20tRNA-Thr(cgt)[94453,94527]  
gctgctgtagctcacctggcagagcgtcggcgtcgtatcccgaaggcatc  
cgggttcgagtcggacagcagcccc  
1-21tRNA-Thr(tgt)[94528,94600]  
gcctctgtggtccagcggcacggacatccgccttgtaagcggaggacccc  
cgttcgatccgggtagaggctc  
1-22tRNA-Thr(ggt)[95008,95080]  
gctgggttagctcagtggttagagcgttcctctggtatgggaaagggccgg  
ggttcaatccccgactcagctc  
1-23tRNA-Gly(gcc)[96403,96476]  
gcgaaggtagctcagctggcagagcgccaccttgccaaggtggaggtcgc  
gggatcgtaacccgttcttcgctc  
1-24tRNA-Asp(gtc)[96480,96552]  
ggccctgtagctcagaggaagagcgccggtctgtcgaatcgaggtcgcg

gtatcgtaatccgtcagggtcgc  
1-25tRNA-Met(cat)[96612,96684]  
gcctcactagctcattggtagagccgctcgctcataacgtgcaggtacct  
ggttcgattccagggtaggtac  
1-26tRNA-Ile(gat)[96690,96764]  
gcctgttagcggactggcgtccgatccaagctgataactggcgtaagc  
gggttcgattcaccgagcaggtac  
1-27tRNA-Arg(acg)[96858,96930]  
gcctctatggccaacggatatgacgccggtctacggaaccggagatgcg  
tgttcgattcgcgctaggggcac  
1-28tRNA-Val(gac)[96973,97045]  
gtccgttagctcagggtagagcgctgctcgacacgcaggaggaccga  
ggttcgaaacctcgcatggacac  
1-29tRNA-Arg(cct)[97219,97292]  
gcctctgtagctcaacggacagagcaacgcggctctaacgcggtggctgg  
aggttcgaatcctctcggaggcac  
1-31tRNA-Gln(ttg)[97833,97908]  
tggggatgggtggaatctggcagtcgcccggaacttgactccggaggt  
gcaggttcgagtcctgctaccccatc  
1-32tRNA-Arg(tct)[97912,97987]  
gccctttagctcagtggaacagagcggcgagcttctacctcgccggccgg  
gagttcgaatcctccaggggcacca  
1-33tRNA-Gln(ctg)[125802,125876]  
tgctcgttggtgtaactggcaacactacggactctgactccgtcattta  
ggttcgaatcctaagcgagcagcca  
1-34tRNA-Asn(gtt)[125883,125958]  
tgggggtgccgttaatcaggcaaacgagcggactgttaatccgccctgc  
aggttcgaatcctgccaccccagcca

>JF704116.1 Mycobacterium phage Drazdys, complete sequence

1-1tRNA-Ser(gct)[31257,31340]  
ggagggtgagcatcaggtgatgcagcgagattgctaataccgtacggtaa  
ccaccccgtaggttcgaatcctcctccctccgc  
1-2tRNA-Leu(cag)[31533,31608]  
gctcccgtagcccaattggcaggaggcaccagattcaggatctgggcagt  
gtgagttcgaatctcaccgggagtac  
1-3tRNA-Leu(gag)[31728,31802]  
gtctctgtaggcaaatcgaaaagccgcatcttgagggggtggtgcgtg  
cgggttcgactcccgcagagacac  
1-4tRNA-Leu(caa)[31803,31876]  
gccgtggtaggcatctggcgagccgaggtcaagtttcggtgtttgc  
gggttcgaatcccgcacgggtac  
1-5tRNA-SeC(tca)[67162,67258]  
attctggcactggtggcgagcccaccggcgagcttcaagctgtcgt  
ggccggagaaccgaccggaacatcccggtcaacgcgacccagggcc

1-6tRNA-Pro(tgg)[91126,91198]  
cggggtgtagttcagtggaagagcgcttggttgggaccaagatgtcgca  
ggttcgaatcctgtcaccccgac  
1-7tRNA-Trp(cca)[91215,91290]  
tggggtgaagccgatctggaaggcagcggtctcaaagccgtctcatagc  
gggttcgaatcccggtcaccctgccca  
1-8tRNA-Tyr(gta)[91292,91378]  
gccgcacatgcccaactgggtgttgggagcaggctgtaaccctgtggcct  
tcgggacggtaggttcgattcctcagtcggtacca  
1-9tRNA-Pyl(cta)[92487,92559]  
gcaccatttgctcaatggcagagcggcggttctaaaaccgtgagtgccg  
gttcgactccggcatggtgcacc  
1-10tRNA-Met(cat)[92709,92783]  
agcgggtgtagagcagctaggtagctcgccgggctcataaccggaggacg  
cgtgttcgaatcacgccaccgccac  
1-11tRNA-Cys(gca)[92910,92981]  
gcgccttggcggaatggctacgtgctcggtgcaacccgagttatccc  
gttcgactccgggaggcgctc  
1-12tRNA-Glu(ctc)[93049,93120]  
gtccccatgggtagtggttaaccctcctggttctcagccaggcgtccga  
gttcgatcctcggtaggtgc  
1-13tRNA-His(gtg)[93175,93248]  
gtgtagtagttcagatggaagaacgtcgcttgtgacggcgaaggctcg  
gggttcgaagcccctctatcacc  
1-14tRNA-Ala(tgc)[93919,93992]  
gggcctatagctcatctggtagagcgctgccttgcaagcaggaggcggc  
aggttcaagtctctgtaggtccac  
1-15tRNA-Phe(gaa)[94182,94254]  
gccgtcatagctcagttggtagagcactggcctgaaaaccagtggccga  
ggttcgattcctcgtgtcggcac  
1-16tRNA-Val(cac)[94260,94333]  
gtccgttagctcagctggaagagcgctcggccacacccgagaggccgc  
aggttcgatccctgcaatggacac  
1-17tRNA-Lys(ctt)[94452,94524]  
gccttcgtagctcagtggtagagctgtcgcccttaagcgataggtcgtt  
ggttcgaatccagccggggcac  
1-18tRNA-Glu(ttc)[94529,94605]  
ggtcgggtcggctgctggtatggccagtcggattttcactccggacatt  
cgcgggttcaattcccgtcccgatcgc  
1-19tRNA-Gly(tcc)[94685,94757]  
gcgggtgtggccgaatggctcaggcaccagatttccactctggctacgca  
ggttcgattcctgtcatccgctc  
1-20tRNA-Thr(cgt)[94817,94891]  
gctgctgtagctcacctggcagagcgtcggtcgtatcccgaaggcatc

cggttcagtagtccggacagcagcccc  
 1-21tRNA-Thr(tgt)[94892,94964]  
 gcctctgtgtccagcggcacggacatccgccttgaagcggaggacccc  
 cgttcgatccgggtagaggctc  
 1-22tRNA-Thr(ggt)[95372,95444]  
 gctgggtagctcagtggttagagcgttcctctggatgggaaagggcccg  
 ggttcaatccccgattcagctc  
 1-23tRNA-Gly(gcc)[96767,96840]  
 gcgaaggtagctcagctggttagagcgccaccttgccaaggtggaggtcgc  
 gggatcgtaacccgttcttcgctc  
 1-24tRNA-Asp(gtc)[96844,96916]  
 ggcctgtagctcagaggaagagcggcgtctgtcgaatcgaggtcgcg  
 gtatcgtaatccgtcagggtcgc  
 1-25tRNA-Met(cat)[96976,97048]  
 gcctcactagctcattggttagagccgctcgtcataacgtgcaggcacct  
 ggttcgattccagggtgaggtac  
 1-26tRNA-Ile(gat)[97054,97128]  
 gcctgttagcggactggtcgtccgatccaagctgataactggcgtaagc  
 ggtgttcgattaccgagcaggtac  
 1-27tRNA-Arg(acg)[97222,97294]  
 gcctctatggtccaacggatatgacgccggtctacggaaccggagatgcg  
 tgttcgattcgcgctaggggcac  
 1-28tRNA-Val(gac)[97337,97409]  
 gtccgttagctcaggggtagagcgctgctcgacacgcaggaggaccga  
 ggttcgaaacctcgcatggacac  
 1-29tRNA-Arg(cct)[97583,97656]  
 gcctctgtagctcaacggacagagcaacgcggctctaacgcggtggctgg  
 aggttcgaatcctctcggaggcac  
 1-31tRNA-Gln(ttg)[98197,98272]  
 tggggtagtgggcaatctggcagtcgcccggaatttgactccggaggt  
 gcaggttcgagtcctgctaccccatc  
 1-32tRNA-Arg(tct)[98276,98351]  
 gccctgttagctcagtggaagagcggcgagcttctacctcggggcccgg  
 gattcgaatctctccaggggcacca  
 1-33tRNA-Gln(ctg)[126574,126648]  
 tgctcgttggtgtaactggcaacactacggactctgactccgtcatttta  
 ggttcgaatcctaagcgagcagcca  
 1-34tRNA-Asn(gtt)[126655,126730]  
 tgggggtgccgttaatcaggcaaacgagcggactgttaatccgccctgc  
 aggttcgaatcctgccacccagcca

>JN699625.1 Mycobacterium phage Wally, complete genome

1-tRNA-Ser(gct)[30107,30190]  
 ggagggtgagcatctggtgatgcaggggtcctgctaaggccctacggatt  
 cacacccgtgagtttcgattactcctccctccgc



1-2tRNA-Leu(cag)[30287,30363]  
gccctgctgagcaactggcaaagctgccgattcagagtgcgggtcatt  
tccgggttcgactcccgggcagggtac

1-3tRNA-Leu(gag)[30483,30557]  
gtctctgtaggcaaatcgaaaagcccatcttgaggggtggtgcgtg  
cgggttcgactcccgcagagacac

1-4tRNA-Leu(caa)[30558,30631]  
gccgtggtaggcatctggcgagccgccgagttcaagttcgggtttgc  
gggttcgaatcccgcacgggtac

1-5tRNA-Pro(tgg)[90313,90387]  
cggggtgtagttcagtttgaagagcgttggttgggaccaagatgtcg  
caggttcgaatcctgtcaccggac

1-6tRNA-Trp(cca)[90402,90472]  
gggtctgtgcacagggtccccgacgggtctcaaagccgaagcgggggtt  
cgattccctccaggcctcca

1-7tRNA-Tyr(gta)[90474,90560]  
cccgatcatgcccaactggtgttgggagcaggctgtaaatctgtggcct  
tcgggacggtaggttcgattcctcagtcggggacca

1-8tRNA-Pyl(cta)[91614,91687]  
tgcgagatcgtgcacggcgactaggagcttctaaccctccgactcggg  
gttcgactcccgcatctcgaccc

1-9tRNA-Met(cat)[91835,91909]  
agcgggtgtagagcagctaggtagctcgccgggtcatgaccggaggacg  
cgtgttcgattcacgccaccggac

1-10tRNA-Cys(gca)[92036,92107]  
gcgccttggcggaatggctacgtgctcggtgcaacccgagttatccc  
gttcgactccgggaggcgctc

1-11tRNA-Glu(ctc)[92175,92246]  
gtccccatgggtagtggttaaccctcctggttctcagccaggcgtccga  
gttcgatcctcggtgggagtgc

1-12tRNA-His(gtg)[92301,92374]  
gtgtagtagttcagatggaagaacgtcgcttgtgacggcgaaggtcgg  
gggttcgaagcccctctatcccc

1-13tRNA-Ala(tgc)[93045,93119]  
gggcctgtagtccaattggtagagcagcatcctgcaagatgacggctg  
tcggttcgaatccgacctgtccac

1-14tRNA-Phe(gaa)[93309,93381]  
gccgtcatagctcagttggtagagcactggcctgaaaaccagtgccga  
ggttcgattcctcgtgtcggcac

1-15tRNA-Val(cac)[93387,93460]  
gtccgttagctcagctggaagagcgtcggccacacccgagaggccgc  
agggtcgaaccctgcaatggacac

1-16tRNA-Lys(ctt)[93579,93651]  
gccttcgtagctcagtggtagagctgtcgctcttaagcgataggtcgtt

ggttcgaatccagccggggcac  
1-17tRNA-Glu(ttc)[93656,93732]  
ggtcgggtcggctcgtggtatggccagtcggatttcactccggacatt  
cgcggggtcaattcccgtcccgatcgc  
1-18tRNA-Gly(tcc)[93812,93884]  
gggggtgtggccgaatggctcaggcaccagattccactctggctacgca  
ggttcgattcctgtcatccgctc  
1-19tRNA-Thr(cgt)[93966,94040]  
gctgctgtagctcacctggtagagcgtcggcgtcgtatcccgaaggcatc  
cggttcgagtcggacagcagcccc  
1-20tRNA-Thr(tgt)[94041,94113]  
gcctctgtggtccagcggcacggacatccgccttgaagcggaggacccc  
cgttcgatccgggtagaggctc  
1-21tRNA-Thr(ggt)[94521,94593]  
gctgggttagctcagtggtagagcgttcctctggtatgggaaaggccgg  
ggttcaatcccccactcagctc  
1-22tRNA-Gly(gcc)[95916,95989]  
gcgaaggtagctcagctggcagagcggcaccttgccaaggtggaggtcgc  
gggatcgtaacccgttcttcgctc  
1-23tRNA-Asp(gtc)[95993,96065]  
ggccctgtagctcagaggaagagcgcgatctgtcgaatcggaggtcgcg  
gtatcgtaatccgtcagggtcgc  
1-24tRNA-Met(cat)[96125,96197]  
gcctcactagctcattggtagagccgctcgtcataacgtgcaggtacct  
ggttcgattccagggtgaggtac  
1-25tRNA-Ile(gat)[96203,96277]  
gcctgttagcggactggctcgcgatccaagctgataactggcgtaagc  
ggtgttcgattcaccgagcaggtac  
1-26tRNA-Arg(acg)[96371,96443]  
gcctctatggtccaacggatatgacgccggtctacggaaccggagatgcg  
tgttcgattcgcgctaggggcac  
1-27tRNA-Val(gac)[96486,96558]  
gtccgtgtagctcaggggtagagcgcctgctcgacacgcaggaggaccga  
ggttcgaaacctcgcatggacac  
1-28tRNA-Arg(cct)[96732,96805]  
gcctctgtagctcaacggacagagcaacgcggcctaacgcggtggctgg  
aggttcgaatcctctcggaggcac  
1-30tRNA-Gln(ttg)[97346,97421]  
tggggtatggtggcaatctggcagtcgcccgacttgactccggaggt  
gcaggttcgagtcctgctaccccatc  
1-31tRNA-Arg(tct)[97425,97498]  
gccctttagctcagtggaagagcggcgagcttctacctcgcgggccgg  
gagttcgaatctctccaggggcac  
1-32tRNA-Lys(ttt)[97566,97642]

gggccggtatcttagtctgggtcaaagaagtggaacttttaatccgcgcgcc  
gtgggttcgaatcccacccggcccacc  
1-33tRNA-Gln(ctg)[125172,125246]  
tgctcgttgggtgaactggcaacactacggactctgactccgtcattta  
ggttcgaatcctaagcgagcagcca  
1-34tRNA-Asn(gtt)[125253,125328]  
tgggggtgccgttaatcaggcaaacgagcggactgttaatccgccctgc  
aggttcgaatcctgccaccccagcca

>JN699013.1 Mycobacterium phage Pio, complete genome

1-1tRNA-Ser(gct)[32481,32564]  
ggagggtgagcatctggatgcaggggtcctgctaaggccctacggatt  
cacaccgtgagtttcgattactcctccctccgc  
1-2tRNA-Leu(cag)[32661,32737]  
gccctgctgagcaactggcaaagctgccgattcagagtgcgggtcatt  
tccgggttcgactcccgggcagggtac  
1-3tRNA-Leu(gag)[32857,32931]  
gtctctgtaggcaaatcgaaaagcccatcttgaggggtggtgcgtg  
cgggttcgactcccgcagagacac  
1-4tRNA-Leu(caa)[32932,33005]  
gccgtggtaggccatctggcgagccgccagttcaagtttcggtgtttgc  
gggttcgaatcccgcacgggtac  
1-5tRNA-SeC(tca)[70365,70461]  
attctggcactggtggcgagcccaccggcgagcttcaagctgcgct  
ggccggagaaccgaccggaacatccgttaacgcgacccagggcc  
1-6tRNA-Pro(tgg)[94729,94803]  
cgggggtgagttcagtttgaagagcgttggtttgggaccaagatgtcg  
caggttcgaatcctgtcaccgccac  
1-7tRNA-Trp(cca)[94820,94895]  
tgggggtgaagccgatctggaaggcagcggcttcaaagccgtctcatagc  
gggttcgaatcccgtaaccctgccca  
1-8tRNA-Tyr(gta)[94897,94983]  
gccgcacatgcccaactggtgtttgggagcaggtgtaaccctgtggcct  
tcgggacggtgaggttcgattcctcagtgcggtacca  
1-9tRNA-Pyl(cta)[96092,96164]  
gcaccatttgctcaatggcagagcggcggcttctaaccctgagtgccg  
gttcgattccggcatggtgcacc  
1-10tRNA-Met(cat)[96314,96388]  
agcgggttagagcagctaggtagctcgccgggctcataaccggaggacg  
cgtgttcgaatcacgccaccgccac  
1-11tRNA-Cys(gca)[96515,96586]  
gcgcctttggcggaatggctacgtgctcggtcgaacccgagttatcccg  
gttcgactccgggaggcgctc  
1-12tRNA-Glu(ctc)[96654,96725]  
gtcccatggggtagtgtaaccctcctggttctcagccaggcgtccga

gttcgatcctcggtaggtgc  
1-13tRNA-His(gtg)[96727,96800]  
gtggccgtagttcagccggtagaacgctgggtgtgatccagtcgtcga  
gggttcgagtcctccggtcacc  
1-14tRNA-Ala(tgc)[96962,97036]  
gggcctgtagctccaattggtagagcagcatcctgcaagatgacggctg  
tcggttcgaatccgacctggtccac  
1-15tRNA-Phe(gaa)[97226,97298]  
gccgtcatagctcagttggtagagcactggcctgaaaaccagtgccga  
ggttcgagtcctcgtgtcggcac  
1-16tRNA-Val(cac)[97304,97377]  
gtccgttagctcagctggaagagcgtcggccacacccgagaggccgc  
aggttcgatccctgcaatggacac  
1-17tRNA-Lys(ctt)[97496,97568]  
gccttcgtagctcagtggtagagctgtcgcctttaagcgataggtcgtt  
ggttcgaatccagccggggcac  
1-18tRNA-Glu(ttc)[97573,97649]  
ggtcgggtcggctcgtggtatggccagtcggatttctactccggacatt  
cgcgggttcaattcccgtccgatcgc  
1-19tRNA-Gly(tcc)[97729,97801]  
gcgggtgtggccgaatggctcaggcaccagattccactctggctacgca  
ggttcgattcctgtcatccgctc  
1-20tRNA-Thr(cgt)[97861,97935]  
gtcgtgtagctcacctggcagagcgtcggcgtcgtatcccgaaggcatc  
cggttcgagtcggacagcagcccc  
1-21tRNA-Thr(tgt)[97936,98008]  
gcctctgtgtccagcggcacggacatccgcctgtaagcggaggacccc  
cgttcgatccgggtagaggctc  
1-22tRNA-Thr(ggt)[98416,98488]  
gtcgggttagctcagtggtagagcgttcctctggtatgggaaaggcccg  
ggttcaatccccgattcagctc  
1-23tRNA-Gly(gcc)[99811,99884]  
gcgaaggtagctcagctggcagagcgcaccttgccaagtgagggtcgc  
gggatcgtaacccgttcttcgctc  
1-24tRNA-Asp(gtc)[99888,99960]  
ggccctgtagctcagaggaagagcggcgtctgtcgaatcgagggtcgcg  
gtatcgtaatccgtcagggtcgc  
1-25tRNA-Met(cat)[100020,100092]  
gcctcactagctcattggtagagccgtcgtcataacgtgcaggtacct  
ggttcgattccagggtgaggtac  
1-26tRNA-Ile(gat)[100098,100172]  
gcctgttagcggactggctcgtccgatccaagctgataactggcgttaagc  
ggtgttcgattcaccgagcaggtac  
1-27tRNA-Arg(acg)[100266,100338]

gcctctatggtccaacggatatgacgccggtctacggaaccggagatgcg  
tggtcgattcgcgctaggggcac  
1-28tRNA-Val(gac)[100381,100453]  
gtccgtgtagctcaggggtagagcgcctgctcgacacgcaggaggaccga  
ggttcgaaacctcgcatggacac  
1-29tRNA-Arg(cct)[100627,100700]  
gcctctgtagctcaacggacagagcaacgcggcctaacgcggtggctgg  
agggtcgaatcctctcggaggcac  
1-31tRNA-Gln(ttg)[101241,101316]  
tggggtatggtggcaatctggcagtcgcccgacttgactccggagggt  
gcagggttcgagtcctgctacccatc  
1-32tRNA-Arg(tct)[101320,101395]  
gcccttgtagctcagtggaacagagcggcgagcttctacctcggggccgg  
gagttcgaatcctctccaggggcacca  
1-33tRNA-Gln(ctg)[127922,127996]  
tgctcgttggtgtaactggcaacactacggactctgactccgtcattta  
ggttcgaatcctaagcgagcagcca  
1-34tRNA-Asn(gtt)[128003,128078]  
tggggtgtccgttaatcaggcaaacgagcggactgttaatccgccctgc  
agggtcgaatcctgccacccagcca

>JQ911768.1 Mycobacterium phage Ava3, complete genome

1-tRNA-Ser(gct)[31611,31694]  
ggagggtgagcatctggtgatgcaggggtcctgctaaggccctacggatt  
cacaccgtgagtttcgattactcctccctccgc  
1-2tRNA-Leu(cag)[31791,31867]  
gccctgctgagcaaactggcaaagctgccgcatcagagtcggggtcatt  
tccgggttcgactcccgggcagggtac  
1-3tRNA-Leu(gag)[31987,32061]  
gtctctgtaggcaaatcgaaaagccgccatcttgaggggtggtgcgtg  
cgggttcgactcccgcagagacac  
1-4tRNA-Leu(caa)[32062,32135]  
gccgtggtaggccatctggcgagccgccgagttcaagtttcggtgtttgc  
gggttcgaatcccgcacgggtac  
1-5tRNA-SeC(tca)[67921,68017]  
attctggcactggtggcgagcccaccggcgagcttcaagctgtcgt  
ggccggagaaccgaccggaacatccgttcaacgcgacccagggcc  
1-6tRNA-Pro(tgg)[91216,91290]  
cggggtgtagttcagtttgaagagcgttggtttgggaccaagttgtcg  
cagggtcgaatcctgtcaccgccac  
1-7tRNA-Trp(cca)[91305,91375]  
gggtctgtgcacagggtgcccgcaggtctccaaagccgaaggcgggggtt  
cgattccctccaggcctgcca  
1-8tRNA-Pyl(cta)[92572,92644]  
gcaccatttgcataatggcagagcggcggttctaaaaccgtgagtgccg

gttcgactccggcatggtgcacc  
1-9tRNA-Met(cat)[92794,92868]  
agcggtagagcagctaggtagctccgggctcataacccggaggacg  
cgtgttcgaatcacgccaccgccac  
1-10tRNA-Cys(gca)[92995,93066]  
gcgcctttggcggaaatggctacgtgctcggctgcaacccgagttalccc  
gttcgactccgggaggcgctc  
1-11tRNA-Glu(ctc)[93071,93145]  
ggtccgttggagtagatggatatctgccaccctctcaagtgagatca  
cgggttcaagtcccgtacggactgc  
1-12tRNA-His(gtg)[93147,93220]  
gtggccgtagttcagccggtagaacgtgggtgtgatccagtcgtcga  
gggttcgagtcctccggtcaccc  
1-13tRNA-Ala(tgc)[93382,93456]  
gggcctgtagctccaattggtagagcagcatcctgcaagatgacggctg  
tcggttcgaatccgacctgggtccac  
1-14tRNA-Phe(gaa)[93646,93718]  
gccgtcatagctcagttggtagagcactggcctgaaaaccagtgccga  
ggttcgattcctcgtgtcggcac  
1-15tRNA-Val(cac)[93724,93797]  
gtccgttagctcagctggaagagcgctcggccacacccgagaggccgc  
aggttcgatccctgcaatggacac  
1-16tRNA-Lys(ctt)[93916,93988]  
gccttcgtagctcagtggtagagctgtgcctcttaagcgataggtcgtt  
ggttcgaatccagccgggggcac  
1-17tRNA-Glu(ttc)[93993,94069]  
ggtcgggtcggctcgtggtatggccagtcggatttccactccggacatt  
cgcgggttcaattcccgtccgatcgc  
1-18tRNA-Gly(tcc)[94149,94221]  
gcgggtgtggccgaatggctcaggcaccagattccactctggctacgca  
ggttcgattcctgtcatccgctc  
1-19tRNA-Thr(cgt)[94281,94355]  
gtcgtgtagctcacctggcagagcgtcggcgtcgtatcccgaaggcatc  
cgggtcagtcggacagcagcccc  
1-20tRNA-Thr(tgt)[94356,94428]  
gcctctgtgtccagcggcacggacatccgccttgaagcggaggacccc  
cgttcgatccgggtagaggctc  
1-21tRNA-Thr(ggt)[94488,94560]  
gtcgggttagctcagtggtagagcgttccttggtatgggaaaggccgg  
ggttcaatcccccgactcagctc  
1-22tRNA-Gly(gcc)[95883,95956]  
gcgaagtagctcagctggcagagcgcaccttgccaagtgaggtcgc  
gggatcgaacccgttcttcgctc  
1-23tRNA-Asp(gtc)[95960,96032]

ggccctgtagctcagaggaagagcgccggtctgtcgaatcgagggtcgcg  
gtatcgtaatccgtcagggtcgc  
1-24tRNA-Met(cat)[96092,96164]  
gcctcactagctcattggtagagccgctcgtcataacgtgcaggtacct  
ggttcgattccagggtaggtac  
1-25tRNA-Ile(gat)[96170,96244]  
gcctgttagcggactggcgtccgatccaagctgataactggcgtaagc  
ggtgttcgattcaccgagcaggtac  
1-26tRNA-Arg(acg)[96338,96410]  
gcctctatggtccaacggatatgacccggtctacgaaccggagatgcg  
tgttcgattcgcgctaggggcac  
1-27tRNA-Val(gac)[96453,96525]  
gtccgtgtagctcagggtagagcgctgctgcacacgcaggaggaccga  
ggttcgaaacctcgcatggacac  
1-28tRNA-Arg(cct)[96699,96772]  
gcctctgtagctcaacggacagagcaacgcggtcctaacgcggtggctgg  
aggttcgaatcctctcggaggcac  
1-30tRNA-Gln(ttg)[97313,97388]  
tggggtatggtggcaatctggcagtcgcccgactttgactccggaggt  
gcaggttcgagtcctgctaccccatc  
1-31tRNA-Arg(tct)[97392,97465]  
gccctgtagctcagtggaacagagcggcgagcttctacctcggggccgg  
gagttcgaatctctccaggggcac  
1-32tRNA-Lys(ttt)[97533,97609]  
gggccggtatcttagtctgggtcaaagaagtggaactttaatccgcgcgc  
gtgggttcgaatcccaccgcccacc  
1-33tRNA-Gln(ctg)[125647,125721]  
tgctcgttgggtgaactggcaacactacggactctgactccgtcattta  
ggttcgaatcctaagcgagcagcca  
1-34tRNA-Asn(gtt)[125728,125803]  
tggggtgtccgttaatcaggcaaacgagcggactgttaatccgccctgc  
aggttcgaatcctgccaccccagcca

>KF024734.1 Mycobacterium phage Shrimp, complete genome

1-1tRNA-Ser(gct)[31556,31639]  
ggagggtgagcatctggtgatgcaggggtcctgctaaggccctacggatt  
cacaccgtgagtttcgattactcctccctccgc  
1-2tRNA-Leu(cag)[31736,31812]  
gcctctgtagcaactggcaaagctgccgattcagagtgcgggtcatt  
tccgggttcgactcccgggcagggtag  
1-3tRNA-Leu(gag)[31932,32006]  
gtctctgtaggcaaatcgaaaagcccatcttgaggggtggtgcgtg  
cgggttcgactcccgcagagacac  
1-4tRNA-Leu(caa)[32007,32080]  
gccgtggtaggcatctggcgagccgcgagttcaagtttcggtgtttgc

gggttcgaatccccccacgtac  
1-5tRNA-SeC(tca)[68484,68580]  
attctggcactggtggcgagccccaccggcggcagcttcaagctgtcgt  
ggccggagaaccgaccggaacatccgttcaacgcgacccagggcc  
1-6tRNA-Pro(tgg)[92444,92516]  
cggggtgtagttcagtggaagagcgttggtttgggaccaagatgtcgca  
ggttcgaatcctgtcaccccgac  
1-7tRNA-Trp(cca)[92533,92608]  
tggggtgaagccgatctggaaggcagcggtctcaaagcgtctcatagc  
gggttcgaatcccgtaaccctgcc  
1-8tRNA-Tyr(gta)[92610,92695]  
gccgcacatgccaactggtgttgggagcaggtgtaaccctgtggcct  
cgggacggtaggttcgattcctcagtcgggtacca  
1-9tRNA-Pyl(cta)[93804,93876]  
gcaccatttgctcaatggcagagcggcggcttctaaccctgagtgccg  
gttcgattccggcatggtgcacc  
1-10tRNA-Met(cat)[94026,94100]  
agcgggtgtagagcagctaggtagctcgccgggtcataaccggaggacg  
cgtgttcgaatcacgccaccgccac  
1-11tRNA-Cys(gca)[94227,94298]  
gcgccttggcggaatggctacgtgctcggctgcaaccgagttatcccg  
gttcgactccggaggggcgctc  
1-12tRNA-Glu(ctc)[94303,94377]  
ggtccgttgagtagatggatatctgccaccctctcaaggtggagatca  
cgggttcaagtcccgtaacgactgc  
1-13tRNA-His(gtg)[94379,94452]  
gtggccgtagttcagccggtagaacgctgggtgtgatccagtcgtcga  
gggttcgagtcctccggtcaccc  
1-14tRNA-Ala(tgc)[94614,94688]  
gggcctgtagctccaattggtagagcagcatcctgcaagatgacggctg  
tcggttcgaatccgacctggtccac  
1-15tRNA-Phe(gaa)[94878,94950]  
gccgtcatagctcagttggtagagcactggcctgaaaaccagtgggcca  
ggttcgattcctcgtgtcggcac  
1-16tRNA-Val(cac)[94956,95029]  
gtccgttagctcagctggaagagcgtcgggtccacccgagaggccgc  
aggttcgatccctgcaatggacac  
1-17tRNA-Lys(ctt)[95148,95220]  
cgcttcgtagctcagtggtagagctgtcgctcttaagcgataggtcgt  
tgggttcgaatccagccggggcac  
1-18tRNA-Glu(ttc)[95225,95301]  
ggtcgggtcggtctgctggtatggccagtcggattttcactccggacatt  
cgcgggttcaattcccgtaacgacgc  
1-19tRNA-Gly(tcc)[95382,95454]



gcgggtgtggccgaatggctcaggcaccagatttcactctggctacgca  
ggttcgattcctgtcatccgctc  
1-20tRNA-Thr(cgt)[95514,95588]  
gctgctgtagctcacctggcagagcgtcggcgtcgtatcccgaaggcatc  
cggttcgagtcgacagcagcccc  
1-21tRNA-Thr(tgt)[95589,95661]  
gcctctgtgtccagcggcacggacatccgccttgaagcggaggacccc  
cggtcgatccgggtagaggctc  
1-22tRNA-Thr(ggt)[96069,96141]  
gtcgggttagctcagtggtagagcgttccttggtatgggaaaggcccg  
ggttcaatccccgactcagctc  
1-23tRNA-Gly(gcc)[97464,97537]  
gcgaaggtagctcagctggcagagcgcaccttgccaagtgagggtcgc  
gggatcgaaccgttcttcgctc  
1-24tRNA-Asp(gtc)[97541,97613]  
ggccctgtagctcagaggaagagcgcggctcgtcgaatcggaggtcgcg  
gtatcgaatccgtcagggtcgc  
1-25tRNA-Met(cat)[97673,97745]  
gcctcactagctcattgtagagccgctcgtcataacgtgcaggtacct  
ggttcgattccagggtgaggtac  
1-26tRNA-Ile(gat)[97751,97825]  
gcctgttagcggactggctcctccgatccaagctgataactggcgtaagc  
ggtgttcgattaccgagcaggtac  
1-27tRNA-Arg(acg)[97919,97991]  
gcctctatggtccaacggatatgacccggtctacggaaccggagatgcg  
tgttcgattcgcgctaggggcac  
1-28tRNA-Val(gac)[98034,98106]  
gtccgtgtagctcaggggtagagcgcctgctcgacacgcaggaggaccga  
ggttcgaaacctcgcatggacac  
1-29tRNA-Arg(cct)[98280,98353]  
gcctctgtagctcaacggacagagcaacgcggtcctaacgcggtggctgg  
aggttcgaatcctctcggaggcac  
1-31tRNA-Gln(ttg)[98894,98969]  
tggggtatggtggcaatctggcagtcgcccgacttgactccggaggt  
gcaggttcgagtcctgctacccatc  
1-32tRNA-Arg(tct)[98973,99048]  
gccctttagctcagtggaacagagcggcgagcttctacctcgcgggccgg  
gagttcgaatcctccaggggcacca  
1-33tRNA-Gln(ctg)[126955,127029]  
tgctcgttggtgtaactggcaacactacggactctgactccgtcattta  
ggttcgaatcctaagcgagcagcca  
1-34tRNA-Asn(gtt)[127036,127111]  
tggggtgccgttaatcaggcaaacgagcggactgttaatccgccctgc  
aggttcgaatcctgccacccagcca

>KJ595575.1 Mycobacterium phage Willis, complete genome

1-1tRNA-Ser(gct)[31447,31530]

ggagggtgagcatctggtgatgcagggctcctgctaagccctacggatt  
cacacccgtgagtttcgattactcctccctccgc

1-2tRNA-Leu(cag)[31627,31703]

gccctgctgagcaaaactggcaaagctccgcattcagagtcggggtcatt  
tccgggttcgactcccgggcagggtac

1-3tRNA-Leu(gag)[31823,31897]

gtctctgtaggcaaatcgaaaagccgccatctgaggggtggtgcgtg  
cgggttcgactcccgcagagacac

1-4tRNA-Leu(caa)[31898,31971]

gccgtggtaggccatctggcgagccgccagttcaagttcgggtttgc  
gggttcgaatcccgcacggtac

1-5tRNA-SeC(tca)[68375,68471]

attctggcactggtggcgagcccaccggcgagcttcaagctgtcgt  
ggccggagaaccgaccggaacatccgttcaacgcgaccagggcc

1-6tRNA-Pro(tgg)[91680,91754]

cggggtgtagttcagtttgaagagcgttggtttgggaccaagttgtcg  
caggttcgaatcctgtcacccgac

1-7tRNA-Trp(cca)[91769,91839]

gggtctgtgcacagggtgcccagcgttccaaagccgaaggcgggggtt  
cgattccctccaggcctgcca

1-8tRNA-Pyl(cta)[93036,93108]

gcaccatttgctcaatggcagagcggcggttctaaaaccgtgagtccg  
gttcgactccggcatggtgcacc

1-9tRNA-Met(cat)[93258,93332]

agcgggtgtagagcagctaggtagctcggggtcataaccggaggacg  
cgtgttcgaatcacgccaccgccac

1-10tRNA-Cys(gca)[93459,93530]

gcgcctttggcggaatggctacgtgctcggtgcaacccgagttatccg  
gttcgactccggaggcgctc

1-11tRNA-Glu(ctc)[93535,93609]

ggtccgttgagtagatggatatctgccaccctctcaaggtggagatca  
cgggttcaagtcccgtacggactgc

1-12tRNA-His(gtg)[93611,93684]

gtggccgtagttcagccggtagaacgctgggtgtgatccagtcgtcga  
gggttcgagtcctccggtcaccc

1-13tRNA-Ala(tgc)[93846,93920]

gggcctgtagtccaattggtagagcagcatcctgcaagatgacggctg  
tcggttcgaatccgacctggtccac

1-14tRNA-Phe(gaa)[94110,94182]

gccgtcatagctcagttggtagagcactggcctgaaaaccagtgccga  
ggttcgattcctcgtgtcggcac

1-15tRNA-Val(cac)[94188,94261]

gtccgttagctcagctggaagagcgctcggccacacccgagaggccgc  
aggttcgatccctgcaatggacac  
1-16tRNA-Lys(ctt)[94380,94452]  
gccttcgtagctcagtggttagagctgtcgcctctaagcgataggtcgtt  
ggttcgaatccagccgggggcac  
1-17tRNA-Glu(ttc)[94457,94533]  
ggtcgggtcggctgtgtgtatggccagtcggattttcactccggacatt  
cgcgggttcaattcccgtcccgatcgc  
1-18tRNA-Gly(tcc)[94613,94685]  
gcgggtgtggccgaatggctcaggcaccagattccactctggctacgca  
ggttcgattcctgtcatccgctc  
1-19tRNA-Thr(cgt)[94745,94819]  
gtgtctgtagctcacctggcagagcgctcggcgtcgtatcccgaaggcatc  
cggttcagatccggacagcagcccc  
1-20tRNA-Thr(tgt)[94820,94892]  
gcctctgtgtccagcggcacggacatccgccttctaagcggaggacccc  
cgttcgatccgggttagaggctc  
1-21tRNA-Thr(ggt)[94952,95024]  
gtcgggttagctcagtggttagagcgttccttggatgggaaaggcccgg  
ggttcaatccccgactcagctc  
1-22tRNA-Gly(gcc)[96347,96420]  
gcgaaggtagctcagctggcagagcgccacctgccaaagtgggggtcgc  
gggatcgtaaccgttcttcgctc  
1-23tRNA-Asp(gtc)[96424,96496]  
ggccctgtagctcagaggaagagcgccggtctgtcgaatcggaggtcgcg  
gtatcgaatccgtcagggtcgc  
1-24tRNA-Met(cat)[96556,96628]  
gcctcactagctcattggttagagccgctcgtcataacgtgcaggtacct  
ggttcgattccagggtgaggtac  
1-25tRNA-Ile(gat)[96634,96708]  
gcctgttagcggtcgtcgtccgatccaagctgataactggcgtaagc  
ggtgttcgattaccgagcaggtagc  
1-26tRNA-Arg(acg)[96802,96874]  
gcctctatggtccaacggatatgacccggtctacggaaccggagatgcg  
tgttcgattcgcgctaggggcac  
1-27tRNA-Val(gac)[96917,96989]  
gtccgtgtagctcaggggtagagcgcctgctcgacacgcaggaggaccga  
ggttcgaaacctcgcatggacac  
1-28tRNA-Arg(cct)[97163,97236]  
gcctctgtagctcaacggacagagcaacgcggtcctaacgcggtggctgg  
aggttcgaatcctctcggaggcac  
1-30tRNA-Gln(ttg)[97777,97852]  
tggggtatggtggcaatctggcagtcgcccggtcttgactccggaggt  
gcaggttcgagtcctgctaccccatc

1-31tRNA-Arg(tct)[97856,97929]  
gccctttagctcagtgagacagcggcgagcttctacctcgcgggccgg  
gagttcgaatctctccagggcac  
1-32tRNA-Lys(ttt)[97997,98073]  
gggccggtatcttagtctggtaaagaagtgacttttaatccgcgcgc  
gtgggttcgaatcccacccggcccacc  
1-33tRNA-Gln(ctg)[126111,126185]  
tgctcgttggtgtaactggcaacactacggactctgactccgtcattta  
ggttcgaatcctaagcgagcagcca  
1-34tRNA-Asn(gtt)[126192,126267]  
tggggtgtccgttaatcaggcaaacgagcggactgttaatccgccctgc  
aggttcgaatcctgccaccccagcca

>KM881426.1 Mycobacterium phage ZygoTaiga

1-1tRNA-Ser(gct)[31553,31636]  
ggagggtgagcatctggtgatgcaggggtcctgctaaggccctacggatt  
cacaccgtgagtttcgattactcctccctccgc  
1-2tRNA-Leu(cag)[31733,31809]  
gccctgctgagcaaacggcaaacgtgccgattcagagtgcgggtcatt  
tccgggttcgactcccgggcagggtag  
1-3tRNA-Leu(gag)[31929,32003]  
gtctcttaggcaaatcggaagccgccatcttgaggggtggtgcgtg  
cgggttcgactcccgcagagacac  
1-4tRNA-Leu(caa)[32004,32077]  
gccgtggtaggccatctggcgagccgccgattcaagtttcggtgtttgc  
gggttcgaatcccgcacggtag  
1-5tRNA-SeC(tca)[69405,69501]  
attctggcactggtggcgagcccaccggcgagcttcaagctgtcgt  
ggccggagaaccgaccggaacatcccgttcaacgcgacccagggcc  
1-6tRNA-Pro(tgg)[92700,92774]  
cggggtgtagttcagtttgaagagcgttggttgggaccaagatgtcg  
caggttcgaatcctgtcaccgac  
1-7tRNA-Trp(cca)[92789,92859]  
gggtctgtgcacaggtgccccgacggtctcaaagccgaaggcgggggtt  
cgattccctccaggcctgcca  
1-8tRNA-Pyl(cta)[94056,94128]  
gcaccatttgctcaatggcagagcggcggttctaaaaccgtgagtgccg  
gttcgactccggcatggtgcacc  
1-9tRNA-Met(cat)[94278,94352]  
agcgggtgtagagcagctaggtagctcgccgggtcataaccggaggacg  
cgtgttcgaatcacgccaccgcccac  
1-10tRNA-Cys(gca)[94479,94550]  
gcgcctttggcggaatggctacgtgctcggtgcaacccgagttatcccg  
gttcgactccgggaggcgctc  
1-11tRNA-Glu(ctc)[94555,94629]

gggccgttgagtagatggatatctgccaccctctcaaggtggagatca  
cgggttcaagtcctacggactgc  
1-12tRNA-His(gtg)[94631,94704]  
gtggccgtagttcagccggtagaacgctgggttgatcccagtcgtcga  
gggttcgagtcctccggtcaccc  
1-13tRNA-Ala(tgc)[94866,94940]  
gggcctgtagctccaattggtagagcagcatccttgcaagatgacggctg  
tcggttcgaatccgacctggtccac  
1-14tRNA-Phe(gaa)[95130,95202]  
gccgtcatagctcagttggtagagcactggcctgaaaaccagtgccga  
ggttcgattcctcgtgtcggcac  
1-15tRNA-Val(cac)[95208,95281]  
gtccgttagctcagctggaagagcgctcggtcacacccgagaggccgc  
aggttcgatccctgcaatggacac  
1-16tRNA-Lys(ctt)[95400,95472]  
gccttcgtagctcagtggtagagctgtcgcccttaagcgataggctgtt  
ggttcgaatccagccgggggcac  
1-17tRNA-Glu(ttc)[95477,95553]  
ggtcgggtcggctcgtggtatggccagtcggatttctactccgacatt  
cgcgggttcaattcccgtcccgatcgc  
1-18tRNA-Gly(tcc)[95633,95705]  
gcgggtgtggccgaatggctcaggcaccagattccactctggctacga  
ggttcgattcctgtcatccgctc  
1-19tRNA-Thr(cgt)[95765,95839]  
gtgctgtagctcacctggcagagcgtcggtcgtatcccgaaggcatc  
cggttcgagtcggacagcagcccc  
1-20tRNA-Thr(tgt)[95840,95912]  
gcctctgtggtccagcggcacggacatccgccttgtaagcggaggacccc  
cgttcgatccgggttagaggctc  
1-21tRNA-Thr(ggt)[95972,96044]  
gctgggttagctcagtggtagagcgttccttggtatgggaaagggccgg  
ggttcaatccccgactcagctc  
1-22tRNA-Gly(gcc)[97367,97440]  
gcgaaggtagctcagctggcagagcgccaccttgccaaggtggaggtcgc  
gggatcgtaacccgttcttcgctc  
1-23tRNA-Asp(gtc)[97444,97516]  
ggccctgtagctcagaggaagagcgccggtctgtcgaatcgaggtcgcg  
gtatcgtaatccgtcagggtcgc  
1-24tRNA-Met(cat)[97576,97648]  
gcctcactagctcattggtagagccgctcgtcataacgtgcaggtacct  
ggttcgattccagggtgaggtac  
1-25tRNA-Ile(gat)[97654,97728]  
gcctgttagcggactggtcgtccgatccaagctgataactggcgtaagc  
ggtgttcgattaccgagcaggtac

1-26tRNA-Arg(acg)[97822,97894]  
gcctctatggtccaacggatatgacgccggtctacggaaccggagatgcg  
tggtcgattcgcgctaggggcac

1-27tRNA-Val(gac)[97937,98009]  
gtccgttagctcagggtagagcgctgctcgacacgcaggaggaccga  
gggtcgaaacctcgcatggacac

1-28tRNA-Arg(cct)[98183,98256]  
gcctctgtagctcaacggacagagcaacgcggtcctaacgcggtggctgg  
aggttcgaatcctctcggaggcac

1-30tRNA-Gln(ttg)[98797,98872]  
tggggtatggtggcaatctggcagtcgcccggaacttgactccggaggt  
gcaggttcgagtcctgctaccccatc

1-31tRNA-Arg(tct)[98876,98949]  
gccctttagctcagtgagacagcggcgagcttctacctcggggccgg  
gagttcgaatcctccaggggcac

1-32tRNA-Lys(ttt)[99017,99093]  
gggccggtatcttagtctggtcaaagaagtggaactttaatccgcgcgc  
gtgggttcgaatccaccggccacc

1-33tRNA-Gln(ctg)[127131,127205]  
tgctcgttggtgtaactggcaacactacggactctgactccgtcattta  
gggttcgaatcctaagcgagcagcca

1-34tRNA-Asn(gtt)[127212,127287]  
tggggtgtccgttaatcaggcaaacgagcggactgttaatccgcccctgc  
aggttcgaatcctgccacccagcca

>KR080196.1 Mycobacterium phage Momo, complete genome

1-1tRNA-Ser(gct)[30462,30545]  
ggagggtgagcatcaggtgatgcagcgagattgctaatcccgtagcgtaa  
ccaccccgtaggttcgaatcctcctccctccgc

1-2tRNA-Leu(cag)[30738,30813]  
gctcccgtagcccaattggcaggaggcaccagattcaggatctgggcagt  
gtgagttcgaatctcaccgggagtac

1-3tRNA-Leu(gag)[30933,31007]  
gtctctgtaggcaatcggaagccgcatctgagggggtggtgcgtg  
cgggttcgactcccgcagagacac

1-4tRNA-Leu(caa)[31008,31081]  
gccgtgtaggcatctggcgagccgagttcaagttcgggtgttgc  
gggttcgaatcccgccacggtac

1-5tRNA-SeC(tca)[67487,67583]  
attctggcactggtggcgagcccaccggcgagcttcaagctgtcgt  
ggccggagaaccgaccggaacatccgttcaacgcgacccagggcc

1-6tRNA-Pro(tgg)[90741,90815]  
cggggtgtagttcagtttgaagagcgttggttgggaccaagatgtcg  
caggttcgaatcctgtcaccacgac

1-7tRNA-Trp(cca)[90830,90900]

gggtctgtgcacaggggtccccgacgggtctccaaagccgaaggcgggggtt  
cgattccctccaggcctgcca  
1-8tRNA-Tyr(gta)[90902,90988]  
cccgatcatgccaaactgggtgttgggagcaggctgtaaatctgtggcct  
tcgggacggtaggttcgattcctcagtcgaggacca  
1-9tRNA-Pyl(cta)[92042,92115]  
tgcgagatcgtgcacggcgactaggagcttctaaccctccgactcgcgg  
gttcgactcccgcattcgcaccc  
1-10tRNA-Met(cat)[92263,92337]  
agcggtagagcagctaggtagctcgccgggtcataaccggaggacg  
cgtgttcgattcacgccaccgccac  
1-11tRNA-Cys(gca)[92464,92535]  
gcgcctttggcggaatggctacgtgctcggtgcaaccgagttatcccg  
gttcgactccgggaggcgctc  
1-12tRNA-Glu(ctc)[92540,92614]  
ggtccgttggagtagatggacatctcgccaccctcctaaggtggagatca  
cgggttcaagtcccgtacggactgc  
1-13tRNA-His(gtg)[92616,92689]  
gtggccgtagttcagccggtagaacgtgggttgtgatccagtcgtcga  
gggttcgagtcctccggtcaccc  
1-14tRNA-Ala(tgc)[92851,92925]  
gggcctgtagctccaattggtagagcagcatccttgaagatgacggctg  
tcggttcgaatccgacctggtccac  
1-15tRNA-Phe(gaa)[93115,93187]  
gccgtcatagctcagttggtagagcactggcctgaaaaccagtgccga  
ggttcgattcctcgtgtcgccac  
1-16tRNA-Val(cac)[93193,93266]  
gtccgttagctcagctggaagagcgctcgggtccacacccgagaggccgc  
aggttcgatccctgcaatggacac  
1-17tRNA-Lys(ctt)[93385,93457]  
gccttcgtagctcagtggtagagctgtcgctcttaagcgataggtcgtt  
ggttcgaatccagccgggggcac  
1-18tRNA-Glu(ttc)[93462,93538]  
ggtcgggtcggctgctggtatggccagtcggattttcactccggacatt  
cgcggttcaattcccgtcccgatcgc  
1-19tRNA-Gly(tcc)[93618,93690]  
gcgggtgtggccgaatggctcaggcaccagatttccactctggctacgca  
ggttcgattcctgtcatccgctc  
1-20tRNA-Thr(cgt)[93750,93824]  
gctgctgtagctcacctggcagagcgtcggcgtcgtatcccgaaggcatc  
cggttcagtcggacagcagcccc  
1-21tRNA-Thr(tgt)[93825,93897]  
gcctctgtggtccagcggcacggacatccgccttgaagcggaggacccc  
cgttcgatccgggtagaggctc

1-22tRNA-Thr(ggt)[94305,94377]  
 gctgggtagctcagtggttagagcgttcctctggtatgggaaagggccgg  
 ggttcaatccccgactcagctc  
 1-23tRNA-Gly(gcc)[95700,95773]  
 gcgaaggtagctcagctggcagagcgcaccttgccaaggtggaggtcgc  
 gggatcgtaacccgttctcgc  
 1-24tRNA-Asp(gtc)[95777,95849]  
 ggccctgtagctcagaggaagagcgcggctgtcgaatcgaggtcgcg  
 gtatcgtaatccgtcagggtcgc  
 1-25tRNA-Met(cat)[95909,95981]  
 gcctcactagctcattggttagagcgcctcgtcataacgtgcaggtacct  
 ggttcgattccaggtgaggtac  
 1-26tRNA-Ile(gat)[95987,96061]  
 gcctgttagcggactggctcgtccgatccaagctgataactggcgtaagc  
 ggtgttcgattcaccgagcaggtac  
 1-27tRNA-Arg(acg)[96155,96227]  
 gcctctatggtccaacggatatgacccggctctacgaaccggagatgcg  
 tgttcgattcgcgctaggggcac  
 1-28tRNA-Val(gac)[96270,96342]  
 gtccgtgtagctcaggggtagagcgcctgctcgacacgcaggaggaccga  
 ggttcgaaacctcgcatggacac  
 1-29tRNA-Arg(cct)[96516,96589]  
 gcctctgtagctcaacggacagagcaacgcggtcctaacgcggtggctgg  
 aggttcgaatcctctcggaggcac  
 1-31tRNA-Gln(ttg)[97130,97205]  
 tggggtatggtggcaatctggcagtcgcccgactttgactccggaggt  
 gcaggttcgagtcctgctaccccatc  
 1-32tRNA-Arg(tct)[97209,97284]  
 gccctttagctcagtggttagagcggcgagcttctacctcggggccgg  
 gaggtcgaatctctccagggcacca  
 1-33tRNA-Gln(ctg)[125188,125262]  
 tgctcgttggtgtaactggcaacactacggactctgactccgtcattta  
 ggttcgaatcctaagcgagcagcca  
 1-34tRNA-Asn(gtt)[125269,125344]  
 tgggggtgccgttaatcaggcaaacgagcggactgttaatccgccctgc  
 aggttcgaatcctgccacccagcca

>KX349298.1 Cyanophage S-RIM14 isolate LIS\_02\_1110, complete genome

1-1tRNA-Arg(tct)[164005,164077]  
 gggtcagtagctcagtggttagagcatcgcacttctaatacggttggtcgg  
 gggttcaaatccctcctgacccg

>KX349299.1 Cyanophage S-RIM14 isolate LIS\_22\_0610, complete genome

1-1tRNA-Arg(tct)[164005,164077]  
 gggtcagtagctcagtggttagagcatcgcacttctaatacggttggtcgg  
 gggttcaaatccctcctgacccg



>KX349300.1 Cyanophage S-RIM14 isolate Np\_11\_1211, complete genome  
1-tRNA-Arg(tct)[164012,164084]  
gggtcagtagctcagtgatagagcatcgcacttctaatacggttggtcgg  
gggttcaaatccctcctgacccg

>KX349301.1 Cyanophage S-RIM14 isolate Np\_45\_0711, complete genome  
1-tRNA-Arg(tct)[164005,164077]  
gggtcagtagctcagtgatagagcatcgcacttctaatacggttggtcgg  
gggttcaaatccctcctgacccg

>KX349302.1 Cyanophage S-RIM14 isolate RW\_03\_0110, complete genome  
1-tRNA-Arg(tct)[164005,164077]  
gggtcagtagctcagtgatagagcatcgcacttctaatacggttggtcgg  
gggttcaaatccctcctgacccg

>KX349303.1 Cyanophage S-RIM14 isolate Sn\_11\_0110, complete genome  
1-tRNA-Arg(tct)[165497,165569]  
gggtcagtagctcagtgatagagcatcgcacttctaatacggttggtcgg  
gggttcaaatccctcctgacccg

>KX349304.1 Cyanophage S-RIM14 isolate Sn\_18\_0910, complete genome  
1-tRNA-Arg(tct)[164004,164076]  
gggtcagtagctcagtgatagagcatcgcacttctaatacggttggtcgg  
gggttcaaatccctcctgacccg

>KX349305.1 Cyanophage S-RIM14 isolate Sn\_23\_0910, complete genome  
1-tRNA-Arg(tct)[164006,164078]  
gggtcagtagctcagtgatagagcatcgcacttctaatacggttggtcgg  
gggttcaaatccctcctgacccg

>KX349306.1 Cyanophage S-RIM14 isolate W1\_23\_0910, complete genome  
1-tRNA-Arg(tct)[164558,164630]  
gggtcagtagctcagtgatagagcatcgcacttctaatacggttggtcgg  
gggttcaaatccctcctgacccg

>HM137666.1 Enterobacteria phage T4T, complete genome  
1-tRNA-Arg(tct)c[71151,71225]  
gtcccgctggtgtaatggatagcatagccttctaagttgcggtcct  
ggttcgatcccaggcgaggatacca  
1-2tRNA-Met(cat)c[71938,72011]  
ggcctgtagctcaatggttagcagcagtcacctcataagggaaggta  
ccagttcaaatctggtctgggtca  
1-3tRNA-Thr(tgt)c[72013,72088]  
gctgatttagctcagtaggtagagcacctcacttgtaatgaggatgtcgg  
cggttcgattccgtcaatcagcacca  
1-4tRNA-Ser(tga)c[72095,72183]  
tggaggcgtggcagagtgggttaatgcaccggcttgaaaaccggcagtc  
gtccggcgactcataggttcaaatcctatcgctccgt  
1-5tRNA-Pro(tgg)c[72184,72258]  
ctccgtgtagctcagtttgtagagcgctgattgggatcaggaggtcc  
aaggttcaaatccttgatggagac

1-6tRNA-Gly(tcc)c[72269,72342]  
gcggatatcgataatggtattacctcagactccaatctgatgatga  
gttcgattctcattatccgctcca  
1-7tRNA-Leu(taa)c[72348,72434]  
gcgagaatggtaaattggtaaaggcacagcacttaaatgctgcggaat  
gatttccttgggttcgagtccttctcgacca  
1-8tRNA-Gln(ttg)c[72435,72508]  
tgggaattagccaagttggaagcatagcactttgactgctagatgcaa  
aggttcgagtcctttattcccagc

>KJ477684.1 Enterobacteria phage T4 strain wild, complete genome

1-1tRNA-Arg(tct)c[71153,71227]  
gtcccgtggtgtaatggatagcatagccttctaagttgcggtcct  
ggttcgatcccaggcgaggatacca  
1-2tRNA-Met(cat)c[71940,72013]  
ggcctgtagctcaatggttagcagcagtcctcctaagggaaggtta  
ccagttcaaatctggtctgggtca  
1-3tRNA-Thr(tgt)c[72015,72090]  
gctgatttagctcagtagtagagcacctcactgtaatgaggatgtcgg  
cggttcgattccgtcaatcagacca  
1-4tRNA-Ser(tga)c[72097,72185]  
tggaggcgtggcagagtggttaatgcaccggtctgaaaaccggcagtc  
gtccggcgactcataggttcaaatcctatcgctccgt  
1-5tRNA-Pro(tgg)c[72186,72260]  
ctccgttagctcagtttggtagcgcctgattgggatcaggaggctcc  
aaggttcaaatccttgatggagac  
1-6tRNA-Gly(tcc)c[72271,72344]  
gcggatatcgataatggtattacctcagactccaatctgatgatga  
gttcgattctcattatccgctcca  
1-7tRNA-Leu(taa)c[72350,72436]  
gcgagaatggtaaattggtaaaggcacagcacttaaatgctgcggaat  
gatttccttgggttcgagtccttctcgacca  
1-8tRNA-Gln(ttg)c[72437,72510]  
tgggaattagccaagttggaagcatagcactttgactgctagatgcaa  
aggttcgagtcctttattcccagc

>KJ477685.1 Enterobacteria phage T4 strain 147, complete genome

1-1tRNA-Arg(tct)c[69046,69120]  
gtcccgtggtgtaatggatagcatagccttctaagttgcggtcct  
ggttcgatcccaggcgaggatacca  
1-2tRNA-Met(cat)c[69833,69906]  
ggcctgtagctcaatggttagcagcagtcctcctaagggaaggtta  
ccagttcaaatctggtctgggtca  
1-3tRNA-Thr(tgt)c[69908,69983]  
gctgatttagctcagtagtagagcacctcactgtaatgaggatgtcgg  
cggttcgattccgtcaatcagacca

1-4tRNA-Ser(tga)c[69990,70078]  
tggaggcgtggcagagtgggttaatgcaccggtctgaaaaccggcagtc  
gctccggcgactcataggtcaaactctatcgctccgt  
1-5tRNA-Pro(tgg)c[70079,70153]  
ctccgtgtagctcagtttgtagagcgctgattgggatcaggaggtcc  
aaggttcaaactctgtatggagac  
1-6tRNA-Gly(tcc)c[70164,70237]  
gcggatatcgataatggattacctcagactccaatctgatgatga  
gttcgattctcattatccgtcca  
1-7tRNA-Leu(taa)c[70243,70329]  
gcgagaatggtaaattggtaaaggcacagcacttaaaatgctgcggaat  
gatttccttgtgggttcgagtccttctcgacca  
1-8tRNA-Gln(ttg)c[70330,70403]  
tgggaattagccaagttggaaggcatagcacttgactgctagatgcaa  
aggttcgagtcctttattcccagc

>KJ477686.1 Enterobacteria phage T4 strain GT7, complete genome

1-1tRNA-Arg(tct)c[71151,71225]  
gtcccgtggtgtaatggatagcatacgatccttctaagtttgcggtcct  
ggttcgatcccaggcgggatacca  
1-2tRNA-Met(cat)c[71938,72011]  
ggccctgtagctcaatggtagcagcagtcctcataagggaaggta  
ccagttcaaactcgtctgggtca  
1-3tRNA-Thr(tgt)c[72013,72088]  
gctgatttagctcagtagtagacacctcacttgtaatgaggatgtcgg  
cggttcgattccgtcaatcagacca  
1-4tRNA-Ser(tga)c[72095,72183]  
tggaggcgtggcagagtgggttaatgcaccggtctgaaaaccggcagtc  
gctccggcgactcataggtcaaactctatcgctccgt  
1-5tRNA-Pro(tgg)c[72184,72258]  
ctccgtgtagctcagtttgtagagcgctgattgggatcaggaggtcc  
aaggttcaaactctgtatggagac  
1-6tRNA-Gly(tcc)c[72269,72342]  
gcggatatcgataatggattacctcagactccaatctgatgatga  
gttcgattctcattatccgtcca  
1-7tRNA-Leu(taa)c[72348,72434]  
gcgagaatggtaaattggtaaaggcacagcacttaaaatgctgcggaat  
gatttccttgtgggttcgagtccttctcgacca  
1-8tRNA-Gln(ttg)c[72435,72508]  
tgggaattagccaagttggaaggcatagcacttgactgctagatgcaa  
aggttcgagtcctttattcccagc

>KM607002.1 Enterobacteria phage RB55, complete genome

1-1tRNA-Arg(tct)c[71116,71190]  
gtcccgtggtgtaatggatagcatacgatccttctaagtttgcggtcct  
ggttcgatcccaggcgggatacca

1-2tRNA-Met(cat)c[71903,71976]  
ggccctgtagctcaatggtagcagcagtcacctcataagggaaaggta  
ccagttcaaatctggtctgggtca  
1-3tRNA-Thr(tgt)c[71978,72053]  
gctgatttagctcagtaggtagagcacctcacttgtaatgaggatgtcgg  
cggttcgattccgtcaatcagcacca  
1-4tRNA-Ser(tga)c[72060,72148]  
tggaggcgtggcagagtgggttaatgcaccggtcttgaaaaccggcagtc  
gctccggcgactcataggtcaaatcctatcgctccgt  
1-5tRNA-Pro(tgg)c[72149,72223]  
ctccgttagctcagtttggtagagcgcctgattgggatcaggaggtcc  
aaggtcaaatccttgatggagac  
1-6tRNA-Gly(tcc)c[72234,72307]  
gcggatatcgataatggtattacctcagactccaatctgatgatgtga  
gttcgattctcattatccgtcca  
1-7tRNA-Leu(taa)c[72313,72399]  
gcgagaatggtcaaattggtaaaggcacagcacttaaatgctgcggaat  
gatttccttggtggttcgagtccttctcgacca  
1-8tRNA-Gln(ttg)c[72400,72473]  
tgggaattagccaagttgtaaggcatagcacttgactgctagatgcaa  
aggttcgagtcctttatcccagc

>KM607003.1 Enterobacteria phage RB59, complete genome

1-1tRNA-Arg(tct)c[71129,71203]  
gtcccgtggtgtaatggatagcatagccttctaagtttgcggtcct  
ggttcgatcccaggcgggatacca  
1-2tRNA-Met(cat)c[71916,71989]  
ggccctgtagctcaatggtagcagcagtcacctcataagggaaaggta  
ccagttcaaatctggtctgggtca  
1-3tRNA-Thr(tgt)c[71991,72066]  
gctgatttagctcagtaggtagagcacctcacttgtaatgaggatgtcgg  
cggttcgattccgtcaatcagcacca  
1-4tRNA-Ser(tga)c[72073,72161]  
tggaggcgtggcagagtgggttaatgcaccggtcttgaaaaccggcagtc  
gctccggcgactcataggtcaaatcctatcgctccgt  
1-5tRNA-Pro(tgg)c[72162,72236]  
ctccgttagctcagtttggtagagcgcctgattgggatcaggaggtcc  
aaggtcaaatccttgatggagac  
1-6tRNA-Gly(tcc)c[72247,72320]  
gcggatatcgataatggtattacctcagactccaatctgatgatgtga  
gttcgattctcattatccgtcca  
1-7tRNA-Leu(taa)c[72326,72412]  
gcgagaatggtcaaattggtaaaggcacagcacttaaatgctgcggaat  
gatttccttggtggttcgagtccttctcgacca  
1-8tRNA-Gln(ttg)c[72413,72486]

tgggaattagccaagttggttaaggcatagcactttgactgctagatgcaa  
 aggttcgagtcctttattcccagc  
 >MF360957.1 Bacillus virus PBS1, complete genome  
 1-tRNA-Asn(gtt)[119223,119298]  
 ttgggatatagccaagtggttaaggcaacatgctgtaacatgtctatttc  
 gtaggttcgaatcctactatcccagt  
 >KT321476.1 Mycobacterium phage Zeenon, complete genome  
 1-tRNA-Ser(gct)[31539,31622]  
 ggaggggtgagcatctggtgatgcaggggtcctgctaaggccctacggatt  
 cacaccctgagtttcgattactcctccctccgc  
 1-2tRNA-Leu(cag)[31719,31795]  
 gccctgctgagcaactggcaaagctgccgcattcagagtgcgggtcatt  
 tccgggttcgactcccgggcagggtac  
 1-3tRNA-Leu(gag)[31915,31989]  
 gtctctgtaggcaaatcgaaaagccgcatcttgaggggtggtgcgtg  
 cgggttcgactcccgcagagacac  
 1-4tRNA-Leu(caa)[31990,32063]  
 gccgtggtaggccaatctggcgagccgagttcaagtttcggtgtttgc  
 gggttcgaatcccgcacgggtac  
 1-5tRNA-SeC(tca)[68245,68341]  
 attctggcactggtgggcgagcccaccggcgagcttcaagctgtcgt  
 ggccggagaaccgaccggaacatcccgttcaacgcgacccagggcc  
 1-6tRNA-Pro(tgg)[91594,91668]  
 cggggtgtagttcagtttgaagagcgttggttgggaccaagttgtcg  
 caggttcgaatcctgtcaccccgac  
 1-7tRNA-Trp(cca)[91683,91753]  
 gggctctgtgcacagggtgcccagcgtctccaaagccgaaggcgggggtt  
 cgattccctccaggcctgcca  
 1-8tRNA-Pyl(cta)[92890,92963]  
 tgcgagatctgcacggcgactaggagcttctaaccctccgactcgcgg  
 gttcgactcccgcactctcgaccc  
 1-9tRNA-Met(cat)[93111,93185]  
 agcgggttagagcagctaggtagctcgccgggctcatgaccggaggacg  
 cgtgttcgattcacgccaccggcac  
 1-10tRNA-Cys(gca)[93400,93471]  
 gcgcctttggcggaatggctacgtgctcggtgcaacccgagttatccc  
 gttcgactccgggaggcgctc  
 1-11tRNA-Glu(ctc)[93539,93610]  
 gctcccatgggtagtggttaaccctcctggttctcagccaggcgtcccga  
 gttcgatcctcgtgggagtg  
 1-12tRNA-His(gtg)[93612,93685]  
 gtggccgtagttcagccggtagaacgtgggttgtgatccagtcgtcga  
 ggggttcgagtcctccggtcaccc  
 1-13tRNA-Ala(tgc)[93850,93923]

gggcctatagctcatctggtagagcgctgccttgcaagcaggaggcggc  
aggttcaagtcctgttaggtccac  
1-14tRNA-Phe(gaa)[94113,94185]  
gccgtcatagctcagttggtagagcactggcctgaaaaccagtggtccga  
ggttcgagtcctcgtgtcggcac  
1-15tRNA-Val(cac)[94191,94264]  
gtccgttagctcagctggaagagcgctcggccacacccgagaggccgc  
aggttcgatccctgcaatggacac  
1-16tRNA-Lys(ctt)[94383,94455]  
gccttcgtagctcagtggtagagctgtcgcctttaagcgataggtcgtt  
ggttcaaatccagccgggggcac  
1-17tRNA-Glu(ttc)[94459,94534]  
gttcgggtggtctgttggcaggccggtcgggttttcaccccggtcatc  
cggggttcgattcccgctcccactgc  
1-18tRNA-Gly(tcc)[94664,94736]  
cggggtgtggccgaatggctcaggcaccagacttcattctggctacgca  
ggttcgattcctgtcatccgctc  
1-19tRNA-Thr(cgt)[94796,94870]  
gtctgttagctcacctggcagagcgtcggcgtcgtatcccgaaggcatc  
cggttcgagtcggacagcagcccc  
1-20tRNA-Thr(tgt)[94871,94943]  
gcctctgtgtccagcgccacggacatccgccttgtaagcggaggacccc  
cgttcgatccgggtagaggctc  
1-21tRNA-Thr(ggt)[95351,95423]  
gtcgggttagctcagtggtagagcgttcctctggtatgggaaaggccgg  
ggttcaatccccgactcagctc  
1-22tRNA-Gly(gcc)[96746,96819]  
gcgaaggtagctcagctggcagagcgccaccttgccaaggtggaggtcgc  
gggatcgtaacccgttcttcgctc  
1-23tRNA-Asp(gtc)[96823,96895]  
ggccctgtagctcagaggaagagcgccggtctgtcgaatcggaggtcgcg  
gtatcgtaatccgtcagggtcgc  
1-24tRNA-Met(cat)[96955,97027]  
gcctcactagctcattggtagagccgctcgtcataacgtgcaggtacct  
ggttcgattccagggtgaggtac  
1-25tRNA-Ile(gat)[97033,97107]  
gcctgttagcggactggctcgtccgatccaagctgataactggcgtaagc  
ggtgttcgattcaccgagcaggtac  
1-26tRNA-Arg(acg)[97201,97273]  
gcctctatggtccaacggatatgacgccggtctacggaaccggagatgcg  
tgttcgattcgcgctaggggcac  
1-27tRNA-Val(gac)[97316,97388]  
gtccgttagctcaggggtagagcgctcgtcgcacgcaggaggaccga  
ggttcgaaacctgcatggacac

1-28tRNA-Arg(cct)[97562,97635]  
 gcctctgtagctcaacggacagagcaacgcggtcctaacgcggtggctgg  
 aggttcgaatcctctcggaggcac  
 1-30tRNA-Gln(ttg)[98176,98251]  
 tggggtatggtggcaatctggcagtcgccgacgttgactccggaggt  
 gcaggttcgagtcctgctaccccatc  
 1-31tRNA-Arg(tct)[98255,98328]  
 gcccttgtagctcagtgacagagcggcgagcttctacctcgcgggccgg  
 gagttcgaatctctccaggggcac  
 1-32tRNA-Lys(ttt)[98396,98472]  
 gggccggtatcttagtctggtcaaagaagtgacttttaatcgcgcgcc  
 tggggttcgaatcccacccggcccacc  
 1-33tRNA-Gln(ctg)[126474,126548]  
 tgctcgttggtgtaactggcaacactacggactctgactccgtcattta  
 ggttcgaatcctaagcgagcagcca  
 1-34tRNA-Asn(gtt)[126555,126630]  
 tggggtgtccgtaatcaggcaaacgagcggactgttaatccgccctgc  
 aggttcgaatcctgccaccccagcca  
 >KU726251.1 Enterobacteria phage SEG1, complete genome  
 1-tRNA-Trp(cca)[1573,1648]  
 gggggtatggcgcaattggtagcgaccggtctccaaaaccgaaggttcg  
 aggttcgaaacctcgtgcccccgcca  
 >KM209228.1 Dickeya phage phiD3, complete genome  
 1-tRNA-Met(cat)[133174,133250]  
 gatggtgtagttcagttggttagaacgtgagcactcataatcgctttgtca  
 ctggttcaagtcctgccgccatcgcca  
 >JN797798.1 Bacillus phage BCU4, complete genome  
 1-tRNA-Met(cat)c[148023,148095]  
 agggttatagctcagtggttagtagcgtgggtctcataagcccaaggtcgt  
 aggttcaactcctactagcccta  
 1-2tRNA-Leu(tag)c[148239,148313]  
 tgccgaagtaatccaatggcagagatagcggtttagaaacctacagtg  
 tgggttcgagtcacaccttcggtat  
 1-3tRNA-Leu(taa)c[148318,148405]  
 ggcggagtggtggaattggtagacatatggcacttaaaatgctatgtccg  
 tacgggcgtggtgggttcgagtcctccctccgctacca  
 1-4tRNA-Ile(gat)c[148421,148497]  
 gctagggtagctcagtcaggtagagcagagcttataaggctttggtcg  
 taggttcgaatcctaccctagtagcca  
 1-5tRNA-Tyr(gta)c[148499,148585]  
 gggcgagtatgcaaattggtgaagcaagcgggtctgaaaaccgtgacgta  
 agatacattgcaggttcgaatcctgcctttccacca  
 1-6tRNA-Phe(gaa)c[148724,148799]  
 ggacggatagctcagttggtagagcagaggctgaaaatcctcgtgtcgt

aggttcgattcctactccgtccacca  
 1-7tRNA-Pro(tgg)c[148880,148955]  
 tgtggatagctcagattggtagagcgcttgcttgggagcaagaagtc  
 gtaggtcaagtcctgctatccgcat  
 1-8tRNA-Gln(ttg)c[149269,149341]  
 ttccggagtagccaagtggtaaggcaatagactttgactctatgatcggc  
 gggtcgagaccatcctccgaagt  
 1-9tRNA-Ser(tga)c[149419,149510]  
 ggaaggatactcaagtgataaaagagggcggtcttgaaaaccgctaggc  
 gtgtaaaagcgtgcgtgggtcgaatccactccttcgcca  
 1-10tRNA-Arg(tct)c[149515,149591]  
 tatcccattagccaagttggatcaaggcaacgggcttctatcccgtta  
 cgtgggttcgagtcctacatgggatgt  
 1-11tRNA-Ile(tat)c[149671,149745]  
 gcccttttagccaagcgggtcaaggcagtgaggattatgtcctgcgaatcg  
 gaagttcgaatctccaaggggagc  
 1-12tRNA-Glu(ttc)c[149749,149822]  
 ggggtattggtgaagtggtaaacacatccgactttctatcggagatacg  
 agggttcgaatcccttataccctt  
 1-13tRNA-Thr(tgt)c[149952,150025]  
 gccttctagctcagttgatagagcgattgacttgaatcaataggtcga  
 gggttcgaatccttcagtcggcac  
 1-14tRNA-Asp(gtc)c[150145,150218]  
 tggggatatagtgtagcgggtgaacacacttgactgtctatcaagtagcac  
 ggggttcgagtcgccgttatcctcgt  
 1-16tRNA-Gly(tcc)c[150870,150942]  
 ggggcattagtatatcggttcattattcctggctccaaccaggggaggt  
 cgggtcgaactccgacatgccct  
 1-17tRNA-Ser(gct)c[150948,151038]  
 ggaagggtgtcagagcgggttattgtgcctgttgctaaataggtgtacg  
 tccttaacgtaccacaggttcgaatcctgtaccttcgcca  
 1-18tRNA-Asn(gtt)c[151553,151628]  
 gtgcctgtagctcagtcggtagagcaaacctgttaaggtgaggtcgt  
 aggttcgagccctaccaggtacgcca  
 1-19tRNA-Cys(gca)c[151648,151721]  
 gaaggtgtaccgaagcggcctaacggctcaggttgcaaccctagttttcg  
 tgggttcgaatcccaccactttct

>KT365398.1 Mycobacterium phage DTDevon, complete genome

1-1tRNA-Ser(gct)[31626,31709]  
 ggagggtgagcatcaggtgatgcagcgagattgctaaccggtacggtaa  
 ccaccccgtaggttcgaatcctcctccctccgc  
 1-2tRNA-Leu(cag)[31902,31977]  
 gctcccgtagcccaattggcaggaggcaccagattcaggatctgggcagt  
 gtgagttcgaatctcaccgggagtac



1-3tRNA-Leu(gag)[32097,32171]  
gtctctgtaggcaaatcgaaaagccgccatctgaggggtggtgcgtg  
cgggttcgactcccgccagagacac  
1-4tRNA-Leu(caa)[32172,32245]  
gccgtgtaggccatctggcgagccgccgagttcaagtttcggtgttgc  
gggttcgaatcccgcacggtac  
1-5tRNA-SeC(tca)[68548,68644]  
attctggcactggtggcgagcccaccggcgagcttcaagctgtcgt  
ggccggagaatcgaccggaaacatcccggtcaacgcgacccagggcc  
1-6tRNA-Pro(tgg)[93205,93277]  
cggggtgtagttcagtggaagagcgcttggtttgggaccaagatgtcgca  
ggttcgaatcctgtcaccccgac  
1-7tRNA-Trp(cca)[93294,93369]  
tgggtgaagccgatctggaaggcagcggtctcaaagccgtctcatagc  
gggttcgaatcccgtaacccctgcc  
1-8tRNA-Tyr(gta)[93371,93457]  
gccgcacatcccaactggtgttgggagcaggtgtaacctgtggcct  
tcgggacggtgaggttcgattcctcagtcgggtacca  
1-9tRNA-Pyl(cta)[94566,94638]  
gcaccatttgctcaatggcagagcggcggttctaaaaccgtgagtgccg  
gttcgactccggcatggtgcacc  
1-10tRNA-Met(cat)[94788,94862]  
agcgggtgtagagcagctaggtagctcgccgggtcataaccggaggacg  
cgtgttcgaatcacgccaccgccac  
1-11tRNA-Cys(gca)[94989,95060]  
gcgccttggcggaatggctacgtgctcggtgcaacccgagttatccc  
gttcgactccgggaggcgctc  
1-12tRNA-Glu(ctc)[95065,95139]  
ggtccgttgagtagatggatatctgccaccctctcaagtgagatca  
cgggttcaagtcccgtacggactgc  
1-13tRNA-His(gtg)[95141,95214]  
gtggccgtagttcagccggtagaacgtgggttgtgatccagtcgtcga  
gggttcgagtcctccggtcaccc  
1-14tRNA-Ala(tgc)[95376,95449]  
gggcctatagctcatctggtagagcgctgccttgaagcaggaggcggc  
aggttcaagtcctgttagtccac  
1-15tRNA-Phe(gaa)[95639,95711]  
gccgtcatagctcagttggtagagcactggcctgaaaaccagtgccga  
ggttcgattcctcgtgtcggcac  
1-16tRNA-Val(cac)[95717,95790]  
gtccgttagctcagctggaagagcgctcggccacacccgagaggccgc  
aggttcgatccctgcaatggacac  
1-17tRNA-Lys(ctt)[95909,95981]  
gccttcgtagctcagtggtagagctgtgcctcttaagcgataggtcgtt

ggttcgaatccagccggggcac  
1-18tRNA-Glu(ttc)[95986,96062]  
ggtcgggtcggctcgtcggatggccagtcggatttcactccggacatt  
cgcggggtcaattcccgtcccgatcgc  
1-19tRNA-Gly(tcc)[96142,96214]  
gcggtgtggccgaatggctcaggcaccagattccactctggctacgca  
ggttcgattcctgtcatccgctc  
1-20tRNA-Thr(cgt)[96274,96348]  
gctgctgtagctcacctggcagagcgtcggcgtcgtatcccgaaggcatc  
cggttcgagtcggacagcagcccc  
1-21tRNA-Thr(tgt)[96349,96421]  
gcctctgtgtccagcggcacggacatccgccttgaagcggaggacccc  
cgttcgatccgggtagaggctc  
1-22tRNA-Thr(ggt)[96829,96901]  
gctgggttagctcagtggtagagcgttcctctggatgggaaaggccgg  
ggttcaatccccgattcagctc  
1-23tRNA-Gly(gcc)[98224,98297]  
gcgaaggtagctcagctggtagagcggcaccttccaaggtggaggtcgc  
gggatcgtaacccgttcttcgctc  
1-24tRNA-Asp(gtc)[98301,98373]  
ggccctgtagctcagaggaagagcgcggctcgtcgaatcggaggtcgcg  
gtatcgtaatccgtcagggtcgc  
1-25tRNA-Met(cat)[98433,98505]  
gcctcactagctcattggtagagcgcctcgtcataacgtgcaggtacct  
ggttcgattccagggtgaggtac  
1-26tRNA-Ile(gat)[98511,98585]  
gcctgttagcggactggctcggatccaagctgataactggcgtgaagc  
ggtgttcgattaccgagcagggtac  
1-27tRNA-Arg(acg)[98679,98751]  
gcctctatggtccaacggatatgacgccggtctacggaaccggagatgcg  
tgttcgattcgcgctaggggcac  
1-28tRNA-Val(gac)[98794,98866]  
gtccgtgtagctcaggggtagagcgcctgctcgacacgcaggaggaccga  
ggttcgaaacctcgcatggacac  
1-29tRNA-Arg(cct)[99040,99113]  
gcctctgtagctcaacggacagagcaacgcggctctaacgcggtggctgg  
aggttcgaatcctctcggaggcac  
1-31tRNA-Gln(ttg)[99654,99729]  
tggggtatggtggcaatctggcagtcgccggactttgactccggaggt  
gcaggttcgagtcctgctaccccatc  
1-32tRNA-Arg(tct)[99733,99808]  
gccctgttagctcagtggaagagcggcgagcttctacctcgcgggccgg  
gagttcgaatctctccagggcacca  
1-33tRNA-Gln(ctg)[127929,128003]

tgctcgttggtgtaactggcaacactacggactctgactccgtcatttta  
ggttcgaatcctaagcgagcagcca  
1-34tRNA-Asn(gtt)[128010,128085]  
tgggggtgccgttaatcaggcaaacgagcggactgttaatccgccctgc  
aggttcgaatcctgccaccccagcca

>KJ019158.1 *Synechococcus* phage ACG-2014a isolate Syn7803C33, complete genome

1-1tRNA-Val(tac)[13064,13135]  
gggcgaataactcagcggtagagtgcctcctttacacggagattgtcggg  
ggttcgatcccctcttcgcca  
1-2tRNA-Leu(taa)[18054,18140]  
tgggagtggtggcgaatcggtagacgcaccagacttaaaatctgttgaga  
attaatctcgtgggggtcaagtcccccttctcccat  
1-3tRNA-Thr(tgt)[18764,18836]  
gcctccgtagctcagtggtagagcaggcctttgtaaagctcaggtcgca  
agttcaaatctgtcagaggctc  
1-4tRNA-Asn(gtt)[18841,18913]  
tcctctatagctcagttggtagagcaggtgactgttaatcacctgtccc  
tgggtcagtcagggtggaggag  
1-5tRNA-Arg(tct)[154574,154649]  
tgggtcagtagctcagatggatagagcaactgccttctaagcagtcggcc  
acaggttcgagtcctgtctgaccgt

>KF302034.1 UNVERIFIED: *Pseudoalteromonas* phage HM1, complete genome

1-1tRNA-Lys(ttt)c[71990,72059]  
gccttcgtagctaactggtaagcgacttacttttaatgaggatatgttg  
ttcaattccaaccgaaggca  
1-2tRNA-Arg(tct)c[72061,72137]  
gcaagagtagaacaattggatagttcatctcccttctaaggagacggttg  
taagttcgaatcttacctcttgcca

>KR233165.1 *Escherichia* phage PEC04, complete genome

1-1tRNA-Ser(tga)[6,95]  
ggaggcgtggcagagtggtttaatgcaccggtcttgaaaaccggcagtcg  
ctccggcgactcataggttcgaatcctatcgctccgcca  
1-2tRNA-Thr(tgt)[101,176]  
gctgatttagctcagtaggtagagcaactcacttgtaatgagaaggtcgg  
cgggtcgattccgtcaatcagcacca  
1-3tRNA-Met(cat)[178,252]  
ggccctgtagctggaaggtcaagcaagcgactcataatcgccagatggt  
ggttcaattcaccagggccacca  
1-4tRNA-Tyr(gta)[262,348]  
ggggagttattccgtagaggtagcgggtggactgtaaatccattgtcat  
tgcgactcgggtggttcgactccatcactccccacca  
1-5tRNA-Asn(gtt)[353,427]  
ggatgtgtagctcaatggcagagcgatcgctgttaagcgattggtata  
ggttcgaatcctatcacgtccgcca

1-6tRNA-Arg(tct)[432,507]  
cgaggcatagctcagaaggaagagcaaggaccttctaagtcctaggtcgt  
aggttcgatccctactgcctcgacca  
1-7tRNA-Gln(ttg)[166657,166730]  
tgggaattagccaagttggaaggcactggattttgattccaggatgcaa  
aggttcaagtcctttattcccagc  
1-8tRNA-Leu(taa)[166731,166817]  
gcgagaatggtaaattggtaaaggcacagcacttaaaatgctgcggaat  
gatttccttgggttcgagtccttctcgacca  
1-9tRNA-Gly(tcc)[166823,166896]  
gcggatatcgataatggcattacctcagacttccaatctgatgatgga  
gttcgatttcattatccgctcca

>KJ010548.1 Bacillus phage Bp8p-T, complete genome

1-1tRNA-Met(cat)c[106844,106915]  
gggtcttttagcttaaaggtaaagcaatcagctcataactgataggatagg  
agttcgagtccttaggaccca  
1-2tRNA-Tyr(gta)c[109354,109437]  
gggatagcgctaactggagagttaggcgagactgaaatctcgtgtcg  
gatcactgagtggttcgaatcccacctgtccca  
1-3tRNA-His(gtg)c[109551,109621]  
gagaatgtagcttaacggtaaagcgctgggacgtgactccagttatccaa  
gttcgagtccttgatttctca  
1-4tRNA-Gly(tcc)c[109632,109705]  
gtggtcttagtttaacggtagaattgctggctccaaccagcgggtaagg  
gttcgactcccttagaccatacca  
1-5tRNA-Met(cat)c[110834,110907]  
tacgatgctgaggggtcggtaacccgacgaggtctcataagcctgttttag  
caagttcaactcttgcccttagcaa  
1-6tRNA-Phe(gaa)c[110981,111055]  
tggactggtagctcagtcggtagagcagggggctgaaaatccctgtgtcg  
gaggttcgaatccttctcagtcctat  
1-7tRNA-Asn(gtt)c[111435,111508]  
ttgtcgataactcaatggtagagtgtgactgttaatcaagaagttgt  
aggttcgagtcctactacgacagt

>KJ094029.1 Listeria phage LP-064, complete genome

1-1tRNA-Met(cat)c[35285,35358]  
ttgtcccgtagctagaaggtcgagcaaggagctcataactcctcggtttg  
ggttcgattccaacggggcaatc  
1-2tRNA-Pro(tgg)c[36251,36325]  
caggggtgtagctcagtttggttagagtacccgcttggagacgggaagtc  
gtaggttcgagtcctaccacctga  
1-3tRNA-Arg(tct)c[37443,37513]  
gtccttatggtgtagtgatgcacaagggatttactcccttagcgcgg  
gttcgaatcctgctgaggact

1-4tRNA-Gly(tcc)c[37771,37841]  
 gcgggtatagtataagggtagtagtaccacaggtttccaacatgtagtgggg  
 gttcgaatccccctaccgct  
 1-5tRNA-Asn(gtt)c[37910,37983]  
 gtgtccttaactcagaggtcagagtgccgtcctgttaagtcggaagtcgc  
 tggttcaaatccagcaggatacgc  
 1-6tRNA-Ser(tga)c[38605,38696]  
 ggaaggttggtagagcttggtataacgctagtcttgaaaactagttgcc  
 ctggaatacagggtacaagggttcaatcccttaccttct  
 1-7tRNA-Phe(gaa)c[38709,38780]  
 gtagtcctagctgagatggattagcgttgcctgaaaagcaagagaggca  
 ggttcgatacctcggactcca  
 1-8tRNA-Lys(ttt)c[38786,38857]  
 ggagttatgggtgaatggctatcactcgggtttttaccccggtattcta  
 ggttcgaatcctagtggtcca  
 1-9tRNA-Trp(cca)c[38982,39055]  
 taggggtatagtttatctggtaaaattggtttccaactccaatgaggt  
 gggttcaagtcctactatccctgt  
 1-10tRNA-Gln(ttg)c[39057,39129]  
 tggctctgtagccaagcggtaaggcaacggattttgattccgtgatacgtt  
 ggttcgaatccaactagaccagc  
 1-11tRNA-Thr(tgt)c[39148,39219]  
 gcttgatatgttcaattggtagaacagtggtttgtaagcctcagacgtg  
 ggttcaagtcctactacaagca  
 1-12tRNA-Tyr(gta)c[39302,39383]  
 gtgccattcgcatagaggcaattgcaggggactgtaactcccctcccttc  
 ggggtccaaggttcgagtccttgatggcgca  
 1-13tRNA-Leu(tag)c[39744,39828]  
 tgccgagatggtggaactggtatacacggtagacttagaatctgctgtcc  
 taaggatatgtgggttcgaatcccactctcggat  
 1-14tRNA-Asp(gtc)c[40294,40366]  
 gtgcgtatgatataatggctattatactcggctgtctatcgagaaatagg  
 ggttcgattccccttacgtgcgc  
 1-15tRNA-Ile(gat)c[40470,40542]  
 gccagcatagcttagtaggcaaagcaaccgaccgataatcggtagtcctt  
 ggttcaattccaagtgttggtac  
 1-16tRNA-Ser(gct)c[40719,40805]  
 ggagagttgtcagagaggcttaatgatacgggttgctaactcgttgact  
 agtaatagtagcaagggttcgaatcccttactctct  
 1-17tRNA-Cys(gca)c[40884,40954]  
 gcgggtataaccaactggaaggtagtagactgcaaatctacgtatatgg  
 gttcaattcccattacccgct  
 >KJ094031.2 Listeria phage LP-124, complete genome  
 1-1tRNA-Met(cat)c[129836,129909]

ttgtcccgtagctagaaggtcgagcaaggagctcataactcctcggttg  
ggttcgattcccaacggggaatc  
1-2tRNA-Pro(tgg)c[130802,130876]  
cagggtgtagctcagttggttagagtacccgcttggagacgggaagtc  
gtaggttcgagtcctaccacctga  
1-3tRNA-Arg(tct)c[131994,132064]  
gtccttatggtgtagtggaatgcacaagggaattctactcccttagcgcgg  
gttcgaatcctgctgaggact  
1-4tRNA-Gly(tcc)c[132322,132392]  
gcgggtatagtagtataagggtagtagtaccgaaggttccaacatgtagtggg  
gttcgaatccccctaccgct  
1-5tRNA-Asn(gtt)c[132461,132534]  
gtgtccttaactcagaggtcagagtgccgtcctgtaagtcggaagtcgc  
tggttcaatccagcaggatacgc  
1-6tRNA-Ser(tga)c[133156,133247]  
ggaaggttggttagagcttggaatacgtagcttgaaaactagttgcc  
cttgaatacagggtacaagggttcaaatccctaccttct  
1-7tRNA-Phe(gaa)c[133260,133331]  
gtagtcctagctgagatggattagcgttgcttgaaaagcaagagaggca  
ggttcgatacctcggactcca  
1-8tRNA-Lys(ttt)c[133337,133408]  
ggagttatggtgaaatggctatcactgcgggttttaccctgtattcta  
ggttcgaatcctagtggtcca  
1-9tRNA-Trp(cca)c[133533,133606]  
taggggtatagtttatctggtaaaatattggttccaactccaatgaggt  
gggttcaagtcctactatccctgt  
1-10tRNA-Gln(ttg)c[133608,133680]  
tggtctgtagccaagcggtgaaggcaacggatttgattccgtgatacgtt  
ggttcgaatccaactagaccagc  
1-11tRNA-Thr(tgt)c[133699,133770]  
gcttgtagtcaattggtagaacagtggtttgtaagcctcagacgtg  
ggttcaagtcctactacaagca  
1-12tRNA-Tyr(gta)c[133853,133934]  
gtgccattcgcatagaggcaattgcaggggactgtaactccccctcccttc  
ggggttccaaggttcgagtccttgatggcgca  
1-13tRNA-Leu(tag)c[134295,134379]  
tgccgagatggtggaactggtatacacggtagacttagaatctgctgtcc  
taaggatatgtgggttcgaatccactctcggtat  
1-14tRNA-Asp(gtc)c[134845,134917]  
gtgcgtatgatataatggctattatactcggctgtctatcgagaaatagg  
ggttcgattccccttacgtgcgc  
1-15tRNA-Ile(gat)c[135021,135093]  
gccagcatagcttagtaggcaagcaaccgaccgataatcggtagtcctt  
ggttcaattccaagtggtgtac

1-16tRNA-Ser(gct)c[135270,135356]  
ggagagttgtcagagaggcttaatgatacgggttgctaactcgttgact  
agtaatagtaggaagggttcgaatcccttactctcct  
1-17tRNA-Cys(gca)c[135435,135505]  
gcgggtataaccaactggaaaggtagtagactgcaaatctacgtatatgg  
gttcaattcccattacccgct

>KU737346.1 Bacillus phage Vinny, complete genome

1-1tRNA-Asn(gtt)[32383,32457]  
tgtgctttagctcagtcggtagagctggtggctgtaaccactgtgtcg  
taggttcgagccctacctagcacgt  
1-2tRNA-Gln(ttg)[32463,32535]  
tgctcttagccaagcggtaaggcacgggactttgactctcggacgcgct  
agttcgaatctagcagaggcatc  
1-3tRNA-Trp(cca)[32704,32777]  
gggagtttagtttagtggtaaaacctcggtctccaaaaccgaagtcatat  
gttcgattcgtagctcctgccca  
1-4tRNA-Ser(tga)[32779,32866]  
ggagggttggcagagtggtattatgcagcggcttgaaaaccgccgaggg  
taaaacctccgtgagttcaaatctcacacctctcca  
1-5tRNA-Leu(tag)[33586,33663]  
tgccgaagtaatccaatcaggtagatagcggtttagaaaaccgtccag  
tgtgggttcgacccctccttcggtatc  
1-6tRNA-Tyr(gta)[33670,33753]  
tggcagaatagtaagcggcaacgacagtgactgtaaatcacccctcat  
tcgagttcgtaggttcgagtcctctctgctat  
1-7tRNA-Ser(gct)[34666,34752]  
ggaggggtactcaagcggcgaagagggggacttgctaagtcctagtagcc  
ttaacaggtagcgagggttcgaatccctccccctcct

>KJ019089.1 Synechococcus phage ACG-2014j isolate Syn7803US23, complete genome

1-1tRNA-Met(cat)[17105,17179]  
tgcttccttagcaatctggtgaatgcagcaaaactcataattgcctaagg  
agagttcgatcctctcaggaagcat  
1-2tRNA-Leu(taa)[17181,17267]  
tgcgagtagtggcggaatcggtagacgcaccagacttaaaatctgttgagc  
attatgctctgggagttcaagtccttactcgcgcat  
1-3tRNA-Thr(tgt)[18085,18158]  
gccaaactagctcagctggtagagcagggtttgtaaagctcaggtcgc  
aggttcaagtcctgtgttggtc  
1-4tRNA-Asn(gtt)[18162,18235]  
ttctcttagctcagcggtagagcgggtgactgtaaatcaattgtccc  
tggttcgatcccaggaaggaggagt  
1-5tRNA-Arg(tct)[158075,158150]  
gtctcagtagctcagatggatagagcaattcacttctaataatgggtcg  
ggggttcgagtcctcctgagacgcc

1-6tRNA-Leu(tag)[158153,158235]  
gtcggatggcggaattggtagacgcgccaggttaggtctggtgtctt  
atgacgtggaggttcaagtcctcttaccgacac  
1-7tRNA-Val(tac)[158238,158309]  
gctcgaatagctcagaggtagacacctcctttacacggagattgtcggg  
ggttcgatcccctcttcgagca  
1-8tRNA-Gly(tcc)[160795,160867]  
gcgggtgtagctcagatggtagagcgtcagtttccaaactgaatgtcgt  
cgggtcaagtcgatctcccgt

>KP869109.1 Escherichia coli O157 typing phage 11, complete genome

1-1tRNA-Pro(tgg)[24016,24092]  
ctctgttagctcagcttggtagagcgttccgttggggcggttaagccg  
gaggttcaagtcctccaacagagacca  
1-2tRNA-Glu(ttc)[24100,24177]  
gttcagtagacaaaatggtaaagtcaccactcttcaaagtgatct  
gagggttcaaatccctctggaacgcca  
1-3tRNA-Met(cat)[24268,24344]  
tgcgggtatagagaaaggcgtctcacatgtctcattagcatggtatcgg  
caggttcgactcctgcacccgcctcca  
1-4tRNA-Asn(gtt)[24429,24505]  
ggttaggaagcacataaggatgtgcggtcgcctgtaagcgaatggcac  
agggttcgaatccctgactaaccgcca  
1-5tRNA-Tyr(gta)[24515,24602]  
gtgtcggtatcccgtagatggtagcgggtgggactgtaaatccctgtca  
ttgagactcggtaggttcgactcctacacggcacacca  
1-6tRNA-Asp(gtc)[24608,24685]  
ggttatgtagtttaatctggttaaaatactcccctgtcacgggagatgat  
gagggttcgaatcccttcgtaaccgcca  
1-7tRNA-Lys(ttt)[25115,25190]  
ggaagtgtagcagaatggtagcggcagacttttaatctgacaggcgt  
gggttcgaatccctccacttctacca  
1-8tRNA-Met(cat)[25195,25271]  
ggttcagtcgcagataaggtaatgcaagggtctcataagccctatgaatg  
tgggttcgattcccatctgaacctcca  
1-9tRNA-Ile(gat)[25273,25348]  
gctggtatagttaagaaggttataacactcccctgataagggaacatcgg  
tggttcgattccacctaccagtacca  
1-10tRNA-Trp(cca)[25828,25898]  
agggtgagctatggcagcaatagagtctccaaaattcttgattagatt  
cgaatctctacaccctgcca  
1-11tRNA-Ser(tga)[26331,26420]  
ggtagtagcggctaattggcagccaacagtttgaactgttgccact  
gtagagatacggtaggggttcgactccttactaccgcc  
1-12tRNA-Leu(tag)[26675,26751]



gcacctatagcccaactggttagaggcagcagacttagaatctgctcagtg  
tgagttcgaatctctctaggtgtacca  
1-13tRNA-Lys(ctt)[26759,26834]  
gcagggttagcaaaatgggttatgcggctgactcttaatcagtaagacgat  
gggttcaattccctccacgtgtacca  
1-14tRNA-Ala(tgc)[26841,26916]  
ggggcatagtttatatggttaaaatcgagtttgcaaacttggaact  
gagttcaattctcagtgactccacca  
1-15tRNA-Gly(tcc)[26923,26997]  
gcatccatagtttaaacgggaaaattacagtcttccaaactgaggttgag  
gggtcgattccctctggatgctcca  
1-16tRNA-Thr(tgt)[27005,27080]  
gctcctatcgataattggttattacggttgccttgaagcaacttatca  
gggttcgagtccttgggagcacca  
1-17tRNA-Val(tac)[27177,27251]  
actcgcttagtttatggtaaaacatcaccttacaagatgaagaaaaa  
ggttcaagtccttagtgagtacca  
1-18tRNA-Leu(caa)[27253,27330]  
gttcagtatcccaattggcagaggatgcaagctcaaacctgtattagt  
gacggttcgaatccgtcttggaacacca  
1-19tRNA-Arg(acg)[27336,27411]  
gcaggattagttcaaatggaaagagcaacagctctacgaagctgtaatag  
gggttcgaatcccttatcctgcgcca  
1-20tRNA-Gln(ttg)[28234,28309]  
aggggattagtttacaaggttaaaacctcggtcttgaaatcgaagaagt  
tggttcaattccaacatcccccgcca  
1-21tRNA-Leu(taa)[28312,28390]  
gctccattactccaattggcagagaggccagactaaaatctgtgttatg  
tatcggttcgaatccgatatggagtacca  
1-22tRNA-Gln(ctg)[28396,28471]  
agcggtatagcataactggcaatgcagcagctctgaagctgtcctatta  
aggttcaaatcccttatgccgtgcca  
1-23tRNA-His(gtg)[28503,28578]  
gtggccttatcataaatggttaatgacctatgctgtaacatggtctatac  
gggttcaaatcccgtaggtcacccca  
1-24tRNA-Phe(gaa)[28585,28660]  
agtccaagtagcttatatggttaaagcgctgtctgaaaaacatgagaag  
agggttcaaatcccactggactacca  
1-25tRNA-Ser(gct)[29414,29506]  
ggaagattaaccctaaaaggtaaggagcagtttgctaaactgccagtag  
ctgagaaatcggtgtaccagttcaagctgggtatcttctcca  
1-26tRNA-Cys(gca)[29511,29586]  
gaatccgtgacagaaacggctatgtgcctgtctgcaaacaggtttataa  
gggttcgagtccttcggattctcca

>KP869110.1 Escherichia coli O157 typing phage 12, complete genome

1-1tRNA-Ile(gat)c[419,494]  
gctggtatagttaagaaggtataacactcccctgataagggaacatcgg  
tggttcgattccacctaccagtacca  
1-2tRNA-Met(cat)c[496,572]  
ggttcagtcgcagataaggtaatgcaagggtctcataagccctatgaatg  
tgggttcgattcccatctgaacctcca  
1-3tRNA-Lys(ttt)c[577,652]  
ggaagtgtagcagaatgggtgatgcggcagacttttaatctgacaggcgat  
gggttcgaatccctccacttctacca  
1-4tRNA-Asp(gtc)c[1082,1159]  
ggttatgtagtttaatctggttaaaatactcccctgtcacgggagatgat  
gagggttcgaatcccttcgtaaccgcca  
1-5tRNA-Tyr(gta)c[1165,1252]  
gtgtcgttatcccgtagatggtagcgggtgggactgtaaatccctgtca  
ttgagactcggtagggttcgactcctacacggcacacca  
1-6tRNA-Asn(gtt)c[1262,1338]  
ggttaggaagcacataaggtatgtcggtcgcctgtaagcgaatggcac  
agggttcgaatccctgactaaccgcca  
1-7tRNA-Met(cat)c[1423,1499]  
tgcgggtatagagaaggcgctctcacatgtctcattagcatgggtatcgg  
cagggttcgactcctgcacccgcctcca  
1-8tRNA-Glu(ttc)c[1590,1667]  
gttcagtagacaaaatggtaaagtcaccactcttcaaagtgatatct  
gagggttcaaatcccttctggaacgcca  
1-9tRNA-Pro(tgg)c[1675,1751]  
ctctgttagctcagcttggttagagcgttccgttggggcggttaaggccg  
gagggtcaagtccccaacagagacca  
1-10tRNA-Cys(gca)c[84667,84742]  
gaatccgtgacagaaaacggctatgtcctgtctgcaaaacaggttataa  
gggttcgagtccttcggttctcca  
1-11tRNA-Ser(gct)c[84747,84839]  
ggaagattaaccctaaaaggttaaggagcagtttgctaaactgccagtag  
ctgagaaatcggtgtaccagttcaagtcggtatcttctcca  
1-12tRNA-Phe(gaa)c[85593,85668]  
agtccaagtagcttatatggttaaagcgcgtgtctgaaaaacatgagaag  
agggttcaaatcccactggactacca  
1-13tRNA-His(gtg)c[85675,85750]  
gtggccttatcataaatggtaatgacctatgctgtgaacatgggtctatac  
gggttcaaatcccgtaggtcacccca  
1-14tRNA-Gln(ctg)c[85782,85857]  
agcggtagtagcataactggcaatgcagcagtcctctgaagctgtcctatta  
agggttcaaatccttatgccgtgcca  
1-15tRNA-Leu(taa)c[85863,85941]

gctccattactccaattggcagagaggccagacttaaaatctgtgtatg  
 tatcgggtcgaatccgatatggagtacca  
 1-16tRNA-Gln(ttg)c[85944,86019]  
 aggggattagttfacaaggttaaacctcggctttgaaatcgaagaagt  
 tggttcaattccaacatccccgccca  
 1-17tRNA-Arg(acg)c[86842,86917]  
 gcaggattagttcaaatggaagagcaacagctctacgaagctgtaatatg  
 ggggtcgaatcccttatcctgcgcca  
 1-18tRNA-Leu(caa)c[86923,87000]  
 gttccagatcccaattggcagaggatgcaagctcaaacctgtattagt  
 gacgggtcgaatccgtcttggaacacca  
 1-19tRNA-Val(tac)c[87002,87076]  
 actcgcttagtttataggtaaaacatcaccttacaagatgaagaaaa  
 ggttcaagtccttagtgagtacca  
 1-20tRNA-Thr(tgt)c[87173,87248]  
 gtcctatcgataattgggtattacgggtgccttgaagcaacttatca  
 ggggtcgaatcctgtgggagcacca  
 1-21tRNA-Gly(tcc)c[87256,87330]  
 gcatccatagtttaaacgggaaaattacagcttccaaactgaggttgag  
 ggttcgattccctctggatgctcca  
 1-22tRNA-Ala(tgc)c[87337,87412]  
 ggggtcatagtttatatgggttaaaatcgagtttgcaaaactgggaact  
 gaggtaattctcagtgactccacca  
 1-23tRNA-Lys(ctt)c[87419,87494]  
 gcagggtgtagcaaaatgggtatgcggctgactcttaacagtaagacgat  
 ggggtcaattccctccacctgtacca  
 1-24tRNA-Leu(tag)c[87502,87578]  
 gcacatatagcccaactggtagaggcagcagacttagaatctgctcagtg  
 tgagttcgaatctctctaggtgtacca  
 1-25tRNA-Ser(tga)c[87833,87922]  
 ggtagtagcggctaattggcagccaaacagcttgaaaaactgttgccact  
 gtagagatacggtaggggtcgaactccttacttaccgcc  
 1-26tRNA-Trp(cca)c[88355,88425]  
 aggggtgagctatggcagcaatagagtcctcaaaattcttgattagagtt  
 cgaatctctacaccctgccca

>KP869101.1 Escherichia coli O157 typing phage 3, complete genome

1-1tRNA-Met(cat)[76953,77029]  
 ggccctgtagctcaatggtagcagcagctcccctcataagggaaaggta  
 ccagttcgaatctggctgggtcacca  
 1-2tRNA-Arg(tct)[77033,77109]  
 cgaggcatagctcaattgtatagagcaacggacttctaaccgtaggttg  
 aaggttagaatccttctgtctcgacca

>KP869103.1 Escherichia coli O157 typing phage 5, complete genome

1-1tRNA-Pro(tgg)c[86825,86901]

ctccgcgtagctcagcttggtagagcgctgattgggatcaggaggtcg  
agtggtcgaatcactccgtggagacca  
1-2tRNA-Met(cat)c[86913,86987]  
ggccctgtagctggaaggtcaagcaagcgactcataatgccagacggt  
ggtcaattccaccaggccacca  
1-3tRNA-Thr(tgt)c[86989,87064]  
gctgatgtagcacaatcggtagtgaattgattgtaataataggtgt  
aggttcaagtccctgccatcagcacca  
1-5tRNA-Ser(tga)c[87267,87357]  
ggagggtaggagcaatggtgctcaagcggtcttgaaaaccgtcccgttg  
aggatgactcgaatggttcgattccattactctccgcca  
1-6tRNA-Tyr(gta)c[87472,87558]  
ggggagttatcccgtagaggtagcgggtgtagactgtaaatctattgtcat  
tgcgactcgggtggttcgactccaccactccccacca  
1-7tRNA-Arg(tct)c[87563,87637]  
gccctgtagcttagtggtataaagcagcgccctctaagccgttgacact  
ggttcgagtcagtcacggggtgcca

>KX229736.1 Campylobacter phage PC5, complete genome

1-1tRNA-Met(cat)[60294,60368]  
gggcgagtagctcaatggtagagcaaccggctcataaccggttggtata  
ggttcgattctctatttcgccacca  
1-2tRNA-Asn(gtt)[60567,60641]  
tcgagattagcacagtggtagtgaatcgactgtaatcgatgagtcaga  
ggttcgaatcctctatctgcagcca  
1-3tRNA-Tyr(gta)[60660,60744]  
gtagaagtaggataattggaatccaccagactgtaaatctggcgtcttt  
tggcattgatggttcaagtcacatccttctacacca

>CP011970.1 Peptoclostridium phage phiCDIF1296T strain DSM 1296, complete sequence

1-1tRNA-Ser(gct)[128597,128687]  
ggagaggtactcaagtggtaaagaggatgttgctaaactattaggtca  
attaattgatacagggttcaaatcccttctctctcca

>KR052481.1 Sinorhizobium phage phiM19, complete genome

1-1tRNA-Thr(tgt)c[78771,78854]  
gccggtatagccaagcggtcgaaggcacctgattgtaatcaggtattca  
aacgtcggcagttcgaatctgtctaccggctcca  
1-2tRNA-Gln(ttg)c[78855,78928]  
ttgcccttagttcagttggtagaacgtcgaatttggtttcgaaggtccg  
tggttcgaatccacgagggtgaagc  
1-3tRNA-His(gtg)[83801,83877]  
tcatggatggtgttagtctggtagcacgcggatgtggaccgcaagca  
taggttcaaactcattccatggacca  
1-4tRNA-Leu(caa)[92642,92729]  
tgggagataaaggaaactaccagttcaattctggttctccaagagtaa  
tcgagtggtgtaggttcgagtcctacctccccagcca

1-5tRNA-Met(cat)[93280,93356]  
 tgcgggtagtagcagtggttagctcgtctgcctcataagcagaagggtca  
 tcagttcgaatctgatccccgaacca  
 1-6tRNA-Cys(gca)[94043,94117]  
 gacgagaaggcagaagggttatcgcgggcgttgcaaccgccgtatgtgtc  
 ggttcaagtcggctctcgtctcca  
 1-7tRNA-Lys(ttt)[98675,98751]  
 gcgcgcttaactcagttggttagagtgccgacctttaagtcgtttgtcc  
 ccggttcgagtcgggagcgccacca  
 >KR296695.1 Salmonella phage 41, complete genome  
 1-1tRNA-Met(cat)[85026,85102]  
 ggttctgtagcttagatggttagagcgcttcctcataaggaaggggtcg  
 caggttcaaatcctgccagaaccacca  
 1-2tRNA-Lys(ctt)[85796,85871]  
 ggggtattaactcagcggttagagtagcgcccttaagccgaagggtcga  
 aggttcgaatcctcatgccccacca  
 1-3tRNA-Thr(tgt)[88074,88149]  
 gctcgtatagctcagttggttagagaactccctgtaaggagaaggctgt  
 gggttcgaagcctactgcgagcacca  
 1-4tRNA-Arg(gcg)[88156,88229]  
 tcgttgatagccttagcggtaaaggccactctgcgcaagtgggtcagtg  
 gttcgaatccactcaacgagcca  
 1-5tRNA-Leu(taa)[88531,88606]  
 tgcgtccttggtccaatttggttagaggcatgaggcttaagacttcaggtt  
 ccagttcgaatctggaggcgccacc  
 1-6tRNA-Arg(tct)[88609,88682]  
 cggggtgtagtctaaggatagcagcggtcttctaaccgctatatgctg  
 gttcgaatccagtcaccccgacca  
 1-7tRNA-Cys(gca)[88799,88872]  
 gcacgggtgctggagtggaacagcttcggatgcaaaccgaatgtcagga  
 gttcgattcttctaccgtgctcca  
 1-8tRNA-Tyr(gta)[89528,89617]  
 gtgtcgttagaccgtagggtagcggggcagactgtaaatctgctggctc  
 gaaagggttcgggtagttcgactctatcacggcacacca  
 1-9tRNA-Ile(gat)[89625,89700]  
 gggagtatagtcagtttagtagagcgtcgaccgataatcgagaggtcgc  
 aggagcaaagcctgctactcccacca  
 1-10tRNA-Glu(ttc)[90467,90542]  
 gctcctatcggctaagtggataggccgccagactttcaatctggaaatcc  
 gagttcgattctcggtaggagtgcca  
 1-12tRNA-Trp(cca)[90628,90704]  
 agggacttagcacaattggctagtcagcggattccaaatccgcaggttc  
 tgggttcgaatcccaaggtccctgcca  
 1-13tRNA-Gln(ttg)[90710,90784]

aggaggatgggtgaattggttagcacacgggtctttgaaatccgtagttc  
aggttcagtcctgatcttcctgccca  
1-14tRNA-Ser(gga)[91017,91108]  
ggtggaaatggtcgagcgggttaaagacagcaccttgaaagggtcgggccc  
cctcacaggggtccgtaggttcgaatcctactccaccgccca  
1-15tRNA-Ser(gct)[91115,91208]  
ggaagattaaccctaatacaggaaggatctctttgctaaagagacagta  
gccccggaaaggggtgtgtcagttcaaatctgacatcttcctcc  
1-16tRNA-Ser(tga)[91209,91297]  
ggagagcagggcgcgtgggtgcgtaatccggttgaacccggacccatcgt  
agcgatacggtgacagttcgattctgttgctctcctcca  
1-17tRNA-Asn(gtt)[91451,91535]  
gacgagttggcctagtggttgggcggcgcccgttaagccgtgagtga  
actcaaggaaggttcaaatccttcactcgtcgcca  
1-18tRNA-Asp(gtc)[91543,91618]  
ggggatatggattagcggtaaatactggcctgtcacgccggagtcac  
gggttcgaatcccgttatcctcgcca  
1-19tRNA-His(gtg)[91623,91696]  
gggaaattagtttaagtggtataatggcctctggtgctgagggcgtctcct  
gttcgattcaggaatttcccgccca

>KR698074.1 Escherichia phage APCEc02, complete genome

1-1tRNA-Arg(tct)[77260,77334]  
gcctcttagcttagtgataaagcagcggccttctaagccgttgacact  
ggttcgagtcagtagcgggtgccca  
1-2tRNA-Tyr(gta)[77339,77425]  
ggggagttatcccgtagaggtagcgggtgtagactgtaaatctattgtcat  
tgcgactcgggtggttcgactccaccactccccacca  
1-3tRNA-Ser(tga)[77540,77630]  
tgagggtagggagcaatggtgctcaagcggctctgaaaaccgtcccgttg  
aggatgactcgalgatggttcgattccattaccctcagcca  
1-5tRNA-Thr(tgt)[77833,77908]  
gctgatgtagcacaattggtagtgaattgattgtaataataggttgc  
aggttcgagtcctgctatcagcacca  
1-6tRNA-Met(cat)[77910,77984]  
ggccctgtagctggaaggttcaagcaagcagcactcataatgccagacggt  
ggttcaattccaccagggccacca  
1-7tRNA-Pro(tgg)[77996,78072]  
ctccgcgtagctcagcttggttagagcgctgatttgggatcaggaggtcg  
agtgttcgaatcactccgtggagacca

>KT187252.1 Bacillus phage PBC6, complete genome

1-1tRNA-Met(cat)c[37,109]  
agggttatagctcagtggttagtagcgtgggtctcataagccaaggctcgt  
aggttcgactcctactagcccta  
1-2tRNA-Leu(taa)c[253,339]

tggcggagtgttgaattggtagacataacggacttaaaatccgttgctc  
gttagggcgtggagggttcgagtcacaccttcggtat  
1-3tRNA-Ile(gat)c[349,425]  
gctagggtagctcagtcaggtagagcagtgcttgataaggcattggtcg  
aaggttcaaactctacccttagtacca  
1-4tRNA-Tyr(gta)c[427,513]  
gggcgagtatgcaaattggtgaagcaagcggctgtaaaaccgtgacgta  
agatacattgcaggttcgagtcctgccttcccacca  
1-5tRNA-Phe(gaa)c[650,725]  
ggacggatagctcagttggtagagcagaggctgaaaatcctcgtgctgt  
aggttcgatccctactccgtccacca  
1-6tRNA-Pro(tgg)c[806,881]  
tgtgatatactcagattggtagagcgcttgcttgggagcaagaagtc  
gtagggtcgattcctgctatccgcat  
1-7tRNA-His(gtg)c[888,960]  
cgggggtgtggcgtaacggttaacgaagtgactgtggatcactgaatagg  
ggttcgattcccctcatcctgac  
1-8tRNA-Gln(ttg)c[1043,1115]  
tttcggagtagccaagtggtaaggcaatagactttgactctatgatcggt  
ggttcgagaccatcctccgaagt  
1-9tRNA-Ser(tga)c[1197,1284]  
cgaggaatactcaagtggataaaagaggatggtcttgaaaaccattaggc  
gtgaaagcgtgcgggggttcgaatccctcttctcgcgc  
1-10tRNA-Arg(tct)c[1286,1362]  
acctctatcgccaagcggatcaaggcaacgggcttctatcccgttaatcg  
ggcgttcgaatcgctctagggtgcca  
1-11tRNA-Glu(ttc)c[1403,1477]  
gtcccattggtgaaattggctaacacactcgactttctatcgagattca  
gggggttcgaatcccctatgggttac  
1-12tRNA-Asp(gtc)c[1984,2057]  
ggctcgtagtttaacggtaaaatacatgactgtctatcatgggtcacgg  
gttcgactcccgtacgggtcgcga  
1-13tRNA-Thr(tgt)c[2063,2138]  
gccttctagctcagttggtagagcgattgacttgtaatcaatagtcgt  
gggttcgattcctacagtcggcacca  
1-14tRNA-Gly(tcc)c[2143,2218]  
ggggcattagtatatcggttcattatcctggctccaaccaggaggaggt  
cgggttcgattccgacatgtccctcca  
1-15tRNA-Asn(gtt)c[2409,2484]  
gtgcctgtagctcagttggtagagcaaaaccctgtaaggttgaggtcgt  
aggttcgaaccctaccaggtacgcca  
1-16tRNA-Cys(gca)c[2499,2571]  
gaggatgtaccgaagcggctaacggctaggttgcaaccctagtggtcat  
gggttcgagtcctcatctctct

1-17tRNA-Ser(gct)c[2581,2674]  
 tggaggggtactcaagcgggaagagggcagtttgctaaactgtagtac  
 ctactaataatagtagcaaggggtcgaatccctccctccgt

>KT001917.1 Escherichia phage Murica, complete genome

1-1tRNA-Pro(tgg)c[60714,60790]  
 ctccgcgtagctcagcttgtagagcgctgattgggatcaggaggtcg  
 agtggtcgaatcactccgtggagacca

1-2tRNA-Met(cat)c[60802,60876]  
 ggccctgtagctggaaggtcaagcaagcgactcataatgccagacgg  
 ggtcaattccaccaggccacca

1-3tRNA-Thr(tgt)c[60878,60953]  
 gctgatgtagcacaatcgtagtgcaattgattgtaataataggtgt  
 aggttcaagtcctgccatcagcacca

1-5tRNA-Ser(tga)c[61156,61246]  
 ggagggtagggagcaatggtgctcaagcggcttgaaaaccgtccgtg  
 aggatgactcgaatggttcgattccattactctccgcca

1-6tRNA-Tyr(gta)c[61361,61447]  
 ggggagttatccctagaggtagcggtagactgtaaatctattgtcat  
 tgcgactcgggtggttcgactccaccactccccacca

1-7tRNA-Arg(tct)c[61452,61526]  
 gccctgtagcttagtgataaagcagcgccctctaagccgttgacact  
 ggttcgagtcagtcacgggtgcca

>KU521356.1 Pseudomonas phage KTN4, complete genome

1-1tRNA-Thr(tgt)c[267087,267163]  
 gccgctatagctcagctaggtagagcaacgcacttgtaatgcgtaggtcc  
 tccgttcgattcggagtgccgaccca

1-2tRNA-Asn(gtt)c[270882,270957]  
 tccgtgatagctcagtcggtagagcaagtgactgtaatcactgggtccc  
 tgggtcgagtcaggtcacggagcca

1-3tRNA-Asp(gtc)c[270964,271040]  
 gcgctcatagttcagttggttagaataccgcctgtcacgagggtgtca  
 ggggttcgagtccttgggcgcgcca

1-4tRNA-Met(cat)c[272013,272089]  
 gggcctatagctcagttggttagagcaggcgactcataatcgcttggtcg  
 caggttcaagtctgctgggcccacca

1-5tRNA-Pro(tgg)c[272412,272487]  
 cggagtgtagcgcagttggtagcgcgctgcttgggagcaggatgtcgg  
 gatttcgagtcctccactccgacca

1-6tRNA-Leu(taa)c[272497,272581]  
 gcccgaaatggtaaatggtaaacagaaagacttaaaatcttccggcta  
 cggcttctcggttcgaatccgacttcgggcacca

>KU160494.1 Vibrio phage vB\_VmeM-32, complete genome

1-1tRNA-Met(cat)c[27879,27954]  
 ggccccttagctcagtggttagagcggctcggtcctaaccgattggtcat



gtgttcaagtcacataggggccacca  
 1-2tRNA-Arg(tct)c[27971,28047]  
 gcttcgttaactcaattggatagagtacctgccttctaagcaggttgta  
 caagttcaaatctgtacgaagcgcca  
 1-3tRNA-Asn(gtt)c[28049,28124]  
 ggtggattaactcagttggtagagtattgactgttaatcaattggccac  
 aggttcgattcctgtatccaccgcca  
 >KU255730.1 Escherichia phage phiE142, complete genome  
 1-2tRNA-Arg(tct)c[87920,87996]  
 cgaggcatagctcaattgtatagagcaacggacttctaataccgtaggttg  
 aaggttagaatccttctgtctcgcca  
 1-3tRNA-Met(cat)c[88003,88076]  
 ggcctgtagctcaacggtagcagcagctcccctcataagggaaggta  
 ccagttcgaatctggtctgggtca  
 >KU522583.1 Enterobacteria phage ECGD1, complete genome  
 1-1tRNA-Met(cat)[61400,61475]  
 ggttccatagctcactgacgagcgccacacctcataagtgtcgagggca  
 gggattgtaaccctgggaaccacca  
 1-2tRNA-Leu(taa)[61507,61592]  
 gcaagtgtggtggaattggtgatacacattgtgctaaaacgcaacgctt  
 aaatgattgaggttcgaatccctccactgcacca  
 1-3tRNA-Ser(tga)[61920,62009]  
 ggaaggtaggcgagcggtgcgaaccaggttgaaacctggccattg  
 tagcgatacggatggttcgactccattatcttctcca  
 1-4tRNA-Ser(gct)[62189,62274]  
 ggtagattggtgaaatggtagccacaacagtttgctaaactgtcgtcgga  
 aacggcgtgtaggttcaagtctacatctaccgcca  
 1-5tRNA-Lys(ttt)[62401,62476]  
 acatcgtagcttagttggtagagcaagggcttttaactccaaggtcga  
 aggttcgaatccttcacgatgtacca  
 1-6tRNA-Tyr(gta)[62482,62567]  
 gtaggtatcgcatagcggcaattgctggagactgtaaatctcttgcctt  
 cgggcttcgttggttcgagccaactacctgcacca  
 1-7tRNA-Asn(gtt)[62575,62659]  
 gatggattggcctagtgggtggcgacggactgttaatccgtgaacgaaa  
 gttctagcaaggttcaaatccttgatccatcgcca  
 1-8tRNA-Thr(tgt)[62750,62823]  
 gtcctatcgataacggctattacggttccttgaagcaacttatcag  
 gttcgagtccttgtgggagcacca  
 1-9tRNA-Gly(tcc)[63226,63300]  
 gcgggtatagtgttaatggtagcatatgaggtttccaccctccaggtgca  
 ggttcaagtcctgttactcgctcca  
 1-10tRNA-Gln(ttg)[63400,63473]  
 tggagattagcctagtgggaagcaacggcctttgaagtcgtgatgactag

gttcgattcctagatctccagcca  
1-11tRNA-Pro(tgg)[63481,63556]  
cagtgcgtagcgcagttggtagcgtgggagcttggatgcttcgggtcgc  
aggttcgagtcctgccgcactgacca  
1-12tRNA-Phe(gaa)[63562,63636]  
gcagagatagctgagacggattagtgctaccctgaaaagtagaaaggat  
ggatcgttaccatctctctgcacca  
1-13tRNA-Leu(tag)[63714,63798]  
ggctaagtgggtggaatggatatacacgatacgcttagaacgtattgcccc  
agggattgtgagttcgagtcaccttagctacca  
1-14tRNA-Met(cat)[63887,63962]  
tgatagtggaagctggcgttccgagtcgttcataaggcattgcgagaa  
gagttcgattctcttactatcaacca  
1-15tRNA-Met(cat)[63978,64056]  
cgcgggatagaggagtctggctcctcgccagtttcatatgctggagat  
catcgggtcaaatccgattcccgcctcca  
1-16tRNA-Ile(gat)[64203,64278]  
tgtggtatcgtacagalggtagtacactcgaccgataatcgagaaacaa  
cggttcgactccgtttaccagacca

>KU574722.1 Pectobacterium phage CBB, complete genome

1-1tRNA-Ser(gct)[268791,268880]  
ggtgagttgggggagtggttaaccagcaccctgctaaggtgtcggcct  
cgcaagaggcccggtgggttcaaatcccacactcaccgcca  
1-2tRNA-Trp(cca)[272675,272749]  
gggagtatcgatatcggctattatgttcgggtccaaccgaaagagcag  
ggttcaactccttgtgtcccgcca  
1-3tRNA-Thr(tgt)[275819,275892]  
gcttctatcgataatggcttattactttggcttgaacccaaaaatct  
gcgttcgattcgagtggaagcac  
1-4tRNA-Leu(tag)[280357,280442]  
ggggatgtggcgaaattggtagcacgcatgagtttaggtactcacgcct  
tcgggcgtgtcgggtcgagtcgaccatccccacca  
1-5tRNA-Arg(tct)[288345,288419]  
gctcctatagttaagtggaaataacaggaaccttctaagttctagtcct  
ggttcgattccaggtgggagtgcca  
1-6tRNA-Pyl(cta)[289995,290067]  
gccttttagctcagcggtagagcgggatctctaaatcctttgtcgtg  
ggttcgaatccctccatcggcac  
1-7tRNA-Leu(taa)[290283,290369]  
gcgggtgtggcggtattggtagtagcaaggatttaaaatccctcagac  
ttcggctttaggttcgaatctcatcaccgtacca  
1-8tRNA-Met(cat)[290748,290824]  
ggccctttgtactgtcgcgtgaaagtactctgctcataacagatgtaagg  
tgggttagactcccacaaggccacca

1-9tRNA-Leu(taa)[292672,292756]  
gcgttttggtgaaattggtaaacacaggagacttaaaatctccgcctt  
taggtttgtcggttcagtcgaccagacgcacca  
1-10tRNA-Leu(caa)[299089,299174]  
gggaatatggcgaattggtagtcgaccacactcaaaatgtggcgagg  
caactcgtgtcggttcagtcgactattccacca  
1-11tRNA-Glu(ttc)[302061,302132]  
gttcccatcgtctagtggtaggactttgactttctatcaaaaacctcg  
gttcgaatccgggtgggaacgc  
1-12tRNA-Tyr(gta)[302143,302231]  
gggggaatagtcgtagttggtagcgggcagactgtaaatctgctacac  
gaaagtgtcgggtggttcgactccatcttcctcacca  
1-13tRNA-Ser(tga)[302564,302654]  
ggaagattggcagagcggttaatgcacatgtctgaaaacatgcggggg  
ttaatagccctccctgggtcgaatcccaggtcttcacca  
1-14tRNA-Ile(gat)[304227,304300]  
agcgggttagtatagagcattacactcgactgataatcgagcgaaggcg  
gatcgttaccgccaccgcctacca  
1-15tRNA-Asn(gtt)[307123,307195]  
gactgtatagctcagagcagagcggctccctgttaaggagaaggcggg  
atttcgaaattccctacggtcgc  
1-16tRNA-Gln(ttg)[307716,307789]  
aggcgtatagtgtaatggttagcacaccaggtttgatcctggtaatcg  
aggttcaagtccttgtatgcctgc  
1-17tRNA-Gly(tcc)[308195,308267]  
gcatccatcgtatatacggctattataattggcttcaccaatagaacgg  
agttcgaccctccgtggatgctc  
1-18tRNA-Asp(gtc)[309725,309797]  
ggagccatcgttcaacggttaggatacggcactgtcactgctgagatggg  
gtttcgattaccctgggtccgc  
1-19tRNA-Arg(acg)[310642,310718]  
gtttgttagctcagttggaattagacatttgtctacgaaacaaagggt  
cgcaggttcgagtcctgccatgaacac  
1-20tRNA-Pro(tgg)[311781,311853]  
ctccggttgggtcaatggttgatcgctgttttgggaacaagaatatgga  
agttcgattcttctactggagac  
1-21tRNA-Pro(tgg)[311858,311933]  
cgggatgtagctcagttgatagagtcgctcggttggggcgatgaagccgc  
tggtttgagtcagccatcccgacca  
1-22tRNA-His(gtg)[312274,312350]  
gtgactatgagcgttaactggctaactgttgagattgtgaaactcctgatt  
cgggttcaagccccgatagtcacacca  
1-23tRNA-Phe(gaa)[312636,312712]  
gggtcggttaactcagttggtcagagtggtacactgaaaatgtattggtcg

cgagttcgaatctcgcccgcccacca  
1-24tRNA-Lys(ttt)[313822,313895]  
acctcgtaactcagttggtagagtaacggcttttaaacctgagtggt  
gtgttcgattcacacacaggtac  
1-25tRNA-Cys(gca)[318801,318878]  
gcggggatgcctgagttggcttaaaggagcggattgcaaatccgatgttc  
gtgggttcgaatcccactccctgctcca  
1-26tRNA-Met(cat)[319753,319828]  
ggtcagttagttcagttggtagaacgctgcactcataatgcagaagtcac  
tggatcgtagccagtactgaccacca  
1-27tRNA-Met(cat)[320334,320411]  
tcgggagtagagcagtcgtggttagcttgcaggctcataaccttgaggtc  
ggtggttcaaatccatcctccgcatcca  
1-28tRNA-Ala(tgc)[320478,320551]  
ggggctatagctcagttgggagagcgtctgcctgcacgtagaaggtaa  
cggttcgaacccgtttagctccac

>KU847400.1 UNVERIFIED: Bacillus phage Crookii, complete genome

1-1tRNA-Asn(gtt)[10253,10328]  
gtgcttagctcagtaggtagagcagtggtggttaaccactgtgtcgt  
tggttcgaatccatcctagcacgcca  
1-2tRNA-Asp(gtc)[10333,10406]  
tggggatatagtgtagtggtaaacacgcacggctgtctaccgtgaagcac  
gagttcgagtcctgtatcctcgt

>KU925172.1 Escherichia phage PE37, complete genome

1-1tRNA-Gln(ttg)[93727,93800]  
tgggaattagccaagttggtaaggcactggattttgattccaggatgcaa  
aggttcgagtcctttattcccagc  
1-2tRNA-Leu(taa)[93801,93887]  
gcgagaatggtaaattggtaaggcacagcactaaaatgctgcggaat  
gatttccttgggttcgagtccttctcgacca  
1-3tRNA-Gly(tcc)[93893,93966]  
gcggatatgtataatggtattacctcagactccaatctgatgatga  
gttcgattctcattatccgctcca  
1-4tRNA-Pro(tgg)[93977,94051]  
ctccgttagctcagtttggtagagcgcctgatttgggatcaggaggtcc  
aaggttcaaatccttgatggagac  
1-5tRNA-Ser(tga)[94053,94142]  
ggaggcgtggcagagtggtttaatgcaccggtcttgaaccggcagtcg  
ctccggcgactcatagttcaaatcctatcgctccgcca  
1-6tRNA-Thr(tgt)[94148,94223]  
gctgatttagctcagtaggtagagcaactcacttgtaatgagaaggtcgg  
cggttcgattccgtcaatcagacca  
1-7tRNA-Met(cat)[94225,94299]  
ggccctgtagctggaaggttcaagcaagcagcactcataatgccagatggt

ggttcaattccaccaggccacca  
1-8tRNA-Tyr(gta)[94309,94395]  
ggggagtatcccgtagaggtagcgggtggactgtaaatccattgtcat  
tgcgactcgggtggtcgcactccatcactccccacca  
1-9tRNA-Asn(gtt)[94400,94474]  
ggatgtgtagctcaatggcagagcgcctgttaagcgattgggtata  
ggttcgaatcctatcacgtccgcca  
1-10tRNA-Arg(tct)[94479,94554]  
cgaggcatagctcagaaggaagagcaaggaccttctaagtcctaggtcgt  
aggttcgatccctactgcctcgacca

>KX171211.1 Salmonella phage vB\_SenM-2, complete genome

1-1tRNA-Ser(gct)c[132306,132396]  
ggaaggttccccgagaggtttaagggactcgactgctaatacgagagtgagg  
gcttttagccccgaaggttcgaatccttcaccttccgcca  
1-2tRNA-Tyr(gta)c[132824,132905]  
gtgagtggtggcagagcggtcgaatgcgcctgactgtaaatcaggtatccc  
acgcggtggttcgaatccatccactcacacca  
1-3tRNA-Asn(gtt)c[133301,133376]  
gacgatgtagttcagtcggtagaacggtggactgtaatccatatgtcgc  
aggttcaagtcctgccatcgtcgcca  
1-4tRNA-Met(cat)c[133562,133637]  
ggccccgtagctcagtggttagagcagtgaaactcataattcattggtcgc  
tggttcaagtcagccagggtcacca

>KX495186.1 Bacillus phage PK16, complete genome

1-1tRNA-Met(cat)c[154511,154585]  
tacggttatagctcagtggttagagtggtgctcataagcccaaggtcga  
tggttcaatcccatctaaccgtatc  
1-2tRNA-Leu(tag)c[154678,154762]  
gtcagagtggtggaactggtatacatgcggcacttagaatgccgtgcctt  
cgggattgtgggttcgactcccacctctgacacca  
1-3tRNA-Ile(gat)c[154771,154847]  
actagtgtagctcagtcaggtagagcagtgcttgataaggcattggtca  
caggttcgaatcctgtcactagtagca  
1-4tRNA-Leu(taa)c[154854,154940]  
atcggaatgttggaattggttagacataacgcacttaaaatgcgttgctcc  
ttggggcgtgaggggttcgagtcctcttccgatacca  
1-5tRNA-Tyr(gta)c[154944,155027]  
gggcgtgctatcattggagagataagctgactgtaaatcagtggtcgtaa  
gactgtggaggttcgaatcctccattccacca  
1-6tRNA-Phe(gaa)c[155034,155108]  
ggatagatagctgagacgattagcgagtggttgaaaccactagaggtt  
ggatcggtcccaactctatccacca  
1-7tRNA-Pro(tgg)c[155202,155274]  
acgggtgtaggctagaggtcagtcactgcgttggggcgcagatcacgtt

ggttcgatcccaaccactcgtac  
 1-8tRNA-His(gtg)c[155368,155441]  
 cagtgtgtggtgaagtggcttaacacggacgactgtggatcggttcattcg  
 cagggtcgaatcctgtcatgctga  
 1-9tRNA-Gln(ttg)c[155519,155594]  
 ttccggtgtggacaaactggtaaagtcactaggctttgaccctagggttt  
 ggaggttcgacccttcaccgaagt  
 1-10tRNA-Ser(tga)c[155670,155757]  
 ggagggctactctaactggtaagagacctgccttgaaagcagacgtaggg  
 taaaaccgataggagttcgagtcctcgcctcctcca  
 1-11tRNA-Arg(tct)c[155848,155923]  
 taccctttagccaagtggattaaggcaacgggcttctatcccgaagatc  
 gtgggttcgattcctacaggggggt  
 1-12tRNA-Ser(act)c[156043,156116]  
 atccctttagccaagcggttaaggcagtgaggacactctccacgaatcgg  
 gagttcgatcctccaaggggcgc  
 1-13tRNA-Glu(ttc)c[156119,156194]  
 tggcgatttggtgaagcggtttaacacactcggcttctaccgaggaagc  
 gtgggttcgaaaccacatgcgctat  
 1-14tRNA-Gly(tcc)c[156792,156867]  
 ggggcattcgtatagtggcttattatacctggctccaaccaggggaggt  
 ggtttcgattaccacatgtccctcca  
 1-15tRNA-Thr(tgt)c[156873,156949]  
 gccttctagctcagttggttagagcactgccttgtaagcagtaggtcg  
 tgcgttcgaatcgtacagtcggcacca  
 1-16tRNA-Asp(gtc)c[156962,157035]  
 ggctcgttagtttaacggtaaaatacatgactgtctatcatgggtcacgg  
 gttcaactcccgtacgggtcgcca  
 1-17tRNA-Asn(gtt)c[157227,157302]  
 gtgcctgtagctcagtcggttagagcagaaccctgtaaggtaaggctcgt  
 aggttcgaaccctaccaggtacgcca  
 1-18tRNA-Cys(gca)c[157348,157420]  
 gaggacgtaccgaaacggctaacggctaggttgcaaccctagtatgtgt  
 gagttcgaatctcaccgttctct  
 1-19tRNA-Ser(gct)c[157427,157515]  
 ggaagggtactcaagttggtgaagaggtcaacctgctaagttgatagtac  
 ctgttaaaggtagcagggttcgaatcccttctctct  
 >KX443552.1 Cronobacter phage vB\_CsaM\_leE, complete genome  
 1-1tRNA-Gly(tcc)[50310,50385]  
 gcagggtgatttcaattggtagaatatctggtttccatccagattgttga  
 gggttcgagtccttcacctgtcca  
 >KX552041.2 Escherichia phage ESCO13, complete genome  
 1-1tRNA-Met(cat)[57537,57611]  
 ggccctgtagctcaatgggagagctgtcggctcataaccgatagtagct

ggatcgaaccagccaggccacca  
 1-2tRNA-Arg(tct)[57614,57688]  
 gtctttatggtgtaatggatagcacaggagcttctaaactcttagtcaa  
 ggttcgattcctgtaaagacacca  
 1-3tRNA-Ser(gct)[58019,58104]  
 ggtagattggtgaaatggtagccacagcttgctaaactgtagtcgga  
 aacggcgtgtaggttcgagtcctacatctaccgcca  
 1-4tRNA-Asn(gtt)[58329,58414]  
 gatgagttggctgaatggttaagcggcggactgtaatccgtgttcgaa  
 agaacaatataggttcgaatcctatactcatcgcca  
 1-5tRNA-Thr(tgt)[58506,58580]  
 gtcctatagtataatggctattacaacggtttgtaatccgtggatctc  
 tgttcgattcagtggtggagcacca  
 1-6tRNA-Gly(tcc)[58895,58968]  
 gcgttcttggtgtagcggtagcattccgtcctccaagtcggcggcacga  
 gttcgatcctcgtagaacgctcca  
 1-7tRNA-Gln(ttg)[59067,59142]  
 tggttttagttagtccgtagcacacgacatttgactgtcgtagggt  
 tggttcaaaccagacagaccagcca  
 1-8tRNA-Pro(tgg)[59236,59312]  
 cgggacgtagcacagcttggtagtcgctcgcttgggagcgagaggtcg  
 agtgttcgaatcactccgtcccgacca  
 1-9tRNA-Ile(gat)[59319,59392]  
 tgttcgtagttcaatggtagaaccacgactgataatcgtgagacaaa  
 gttcgattctgtcgaacaacca  
 1-10tRNA-Met(cat)[59471,59549]  
 agcgggatagaggagtctggtcgtcctcgccagttcatatgctggagat  
 catcggttcaaatccgattcccgcctcca  
 >KX431559.1 Cronobacter phage vB\_CsaM\_leB, complete genome  
 1-1tRNA-Gly(tcc)[49614,49689]  
 gcaggtgtagttcaattggtagaatatctggtttccatccagattgttga  
 gggttcgagtccttcacctgctcca  
 >KX431560.1 Cronobacter phage vB\_CsaM\_leN, complete genome  
 1-1tRNA-Gly(tcc)[49078,49153]  
 gcaggtgtagttcaattggtagaatatctggtttccatccagattgttga  
 gggttcgagtccttcacctgctcca  
 >KX721256.1 Mycobacterium phage Erdmann, complete genome  
 1-1tRNA-Ser(gct)[31552,31635]  
 ggagggtgagcatctggtgatgcagggtcctgctaaggccctacggatt  
 cacacccgtgagtttcgattactcctccctccgc  
 1-2tRNA-Leu(cag)[31732,31808]  
 gccctgctgagcaactggcaaagctgccgattcagagtgcgggtcatt  
 tccgggttcgactcccgggcagggtac  
 1-3tRNA-Leu(gag)[31928,32002]

gtctctgtaggcaaatcgaaaagccgccatcttgaggggtggtgcgtg  
cgggttcgactccccccagagacac  
1-4tRNA-Leu(caa)[32003,32076]  
gccgtggtaggccatctggcgagccgccagttcaagtttcggtgttgc  
gggttcgaatcccccccacggtac  
1-5tRNA-SeC(tca)[68480,68576]  
attctggcactggtggcgagcccaccggcgagcttcaagctgtcgt  
ggccggagaaccgaccggaacatcccgttcaacgcgacccagggcc  
1-6tRNA-Pro(tgg)[92444,92518]  
cggggtgtagttcagtttgaagagcgttggttgggaccaagatgtcg  
caggttcgaatcctgtcaccgac  
1-7tRNA-Trp(cca)[92535,92610]  
tgggtgaagccgatctggaaggcagcggtctcaaagccgtctcatagc  
gggttcgaatcccgtaaccctgcca  
1-8tRNA-Tyr(gta)[92612,92698]  
gccgcacatgcccaactggtttgggagcaggctgaaccctgtggcct  
ccgggacggtgaggttcgattcctcagtcggtacca  
1-9tRNA-Pyl(cta)[93808,93880]  
gcaccatttgctcaatggcagagcggcggttctaactccgtgagtccg  
gttcgattccggcatggtgcacc  
1-10tRNA-Met(cat)[94030,94104]  
agcgggtgtagagcagctaggtagctcgggctcataaccggaggacg  
cgtgttcgaatcacgccaccgcccac  
1-11tRNA-Cys(gca)[94231,94302]  
g'gcctttggcggaatggctacgtgctcggtgcaaccgagttatcccg  
gttcgactccgggaggcgctc  
1-12tRNA-Glu(ctc)[94307,94381]  
ggtccgttgagtagatggatatctgccaccctctcaagtgagatca  
cgggttcaagtcctacggactgc  
1-13tRNA-His(gtg)[94383,94456]  
gtggccgtagttcagccggtagaacgctgggttgatccagtcgtcga  
gggttcgagtcctccggtcaccc  
1-14tRNA-Ala(tgc)[94618,94692]  
gggcctgtagtccaattggtagagcagcatccttgaagatgacggctg  
tcggttcgaatccgacctggtccac  
1-15tRNA-Phe(gaa)[94882,94954]  
gccgtcatagctcagttggtagagcactggcctgaaaaccagtgccga  
ggttcgattcctcgtgtcggcac  
1-16tRNA-Val(cac)[94960,95033]  
gtccgtttagctcagctggaagagcgctcggtccaccccagaggccgc  
aggttcgatccctgcaatggacac  
1-17tRNA-Lys(ctt)[95152,95224]  
gccttcgtagctcagtggtagagctgtcgctcttaagcgataggtcgtt  
ggttcgaatccagccgggggcac



1-18tRNA-Glu(ttc)[95229,95305]  
ggtcgggtcgggtctgctggtagggcagtcggatttccactccggacatt  
cgcgggttcaattcccgtcccgatcgc

1-19tRNA-Gly(tcc)[95385,95457]  
gcgggtgtggccgaatggctcaggcaccagattccactctggctacgca  
ggttcgattcctgtcatccgctc

1-20tRNA-Thr(cgt)[95518,95592]  
gctgctgtagctcacctggtagagcgtcggcgtcgtatcccgaaggcatc  
cggttcgagtcggacagcagcccc

1-21tRNA-Thr(tgt)[95593,95665]  
gcctctgtggtccagcggcacggacatccgccttctaagcggaggacccc  
cgttcgatccgggtagaggctc

1-22tRNA-Thr(ggt)[95725,95797]  
gtcgggtagctcagtggtagagcgttcctctggtatgggaaagggccgg  
ggttcaatccccgactcagctc

1-23tRNA-Gly(gcc)[97120,97193]  
gcgaaggtagctcagctggcagagcggcacctgccaaagtgagggtcgc  
gggatcgtaacccgttcttcgctc

1-24tRNA-Asp(gtc)[97197,97269]  
ggccctgtagctcagaggaagagcggcgtctgtcgaatcggaggtcgcg  
gtatcgtaatccgtcagggtcgc

1-25tRNA-Met(cat)[97329,97401]  
gcctcactagctcattggtagagccgctcgtcataacgtgcaggtaacct  
ggttcgattccagggtgaggtac

1-26tRNA-Ile(gat)[97407,97481]  
gcctgttagcggactggctgtccgatccaagctgataactggcgtaagc  
ggtgttcgattcaccgagcaggtac

1-27tRNA-Arg(acg)[97575,97647]  
gcctctatggtccaacggatatgacccggtctacggaaccggagatgcg  
tgttcgattcgcgttagggcac

1-28tRNA-Val(gac)[97691,97763]  
gtccgtgtagctcagggtagagcgcctgctcgacacgcaggaggaccga  
ggttcgaaacctcgcatggacac

1-29tRNA-Arg(cct)[97937,98010]  
gcctctgtagctcaacggacagagcaacgcggtcctaacgcggtggctgg  
aggttcgaatcctctcggaggcac

1-31tRNA-Gln(ttg)[98551,98626]  
tggggtatggtggcaatctggcagtcgcccggttctgactccggaggt  
gcaggttcgagtcctgctaccccatc

1-32tRNA-Arg(tct)[98630,98705]  
gccctgtagctcagtggaacagagcggcgagcttctacctcggggccgg  
gagttcgaatctctccagggcacca

1-33tRNA-Gln(ctg)[126301,126375]  
tgctcgttggtgtaactggcaacactacggactctgactccgtcatttta

gggtcgaatcctaagcgagcagcca  
 1-34tRNA-Asn(gtt)[126382,126457]  
 tgggggtgccgttaatcaggcaaacgagcggactgtaatccgccctgc  
 aggttcgaatcctgccaccccagcca  
 >KX721255.1 Mycobacterium phage Yucca, complete genome  
 1-1tRNA-Ser(gct)[31474,31557]  
 ggagggtgagcatctggtgatgcaggggtcctgctaaggccctacggatt  
 cacaccctgagtttcgattactcctccctccgc  
 1-2tRNA-Leu(cag)[31654,31730]  
 gccctgctgagcaactggcaaagctgccgattcagagtcgggtcatt  
 tccgggttcgactcccgggcagggtac  
 1-3tRNA-Leu(gag)[31850,31924]  
 gtctctgtaggcaaatcgaaaagccgccatctgagggggtggtcgtg  
 cgggttcgactcccgcagagacac  
 1-4tRNA-Leu(caa)[31925,31998]  
 gccgtggtaggccatctggcgagccgccgagttcaagttcgggtgttgc  
 ggttcgaatcccgcacgggtac  
 1-5tRNA-SeC(tca)[68159,68255]  
 attctggcactggtggcgagcccaccggcgagcttcaagctgtcgt  
 ggccggagaaccgaccgaaacatcccgtcaacgcgacccagggcc  
 1-6tRNA-Pro(tgg)[91508,91582]  
 cggggtgtagttcagtttgaagagcgttggttgggaccaagttgtcg  
 caggttcgaatcctgtcaccctgac  
 1-7tRNA-Trp(cca)[91597,91667]  
 gggctctgtgcacagggtgcccgcaggtctccaaagccgaaggcgggggtt  
 cgattccctccaggcctgcca  
 1-8tRNA-Pyl(cta)[92804,92877]  
 tgcgagatcgtgcacggcgactagagcttctaaccctccgactcgcgg  
 gttcgactcccgcactcgcaccc  
 1-9tRNA-Met(cat)[93025,93099]  
 agcgggtgtagcagctaggtagctcgccgggctcatgacccggaggacg  
 cgtgttcgattcacgccaccgccac  
 1-10tRNA-Cys(gca)[93314,93385]  
 gcgcctttggcggaatggctacgtgctcggtgcaacccgagttatcccg  
 gttcgactccgggaggcgctc  
 1-11tRNA-Glu(ctc)[93453,93524]  
 gctcccatgggtagtggttaaccctcctggttctcagccaggcgtcccga  
 gttcgatcctcggtaggtgc  
 1-12tRNA-His(gtg)[93526,93599]  
 gtggccgtagttcagccggtagaacgctgggttgtgatccagtcgtcga  
 ggggttcgagtcctccggtcaccc  
 1-13tRNA-Ala(tgc)[93764,93837]  
 gggcctatagctcatctggtagagcgctgccttgcaagcaggaggcggc  
 aggttcaagtcctgttaggtccac

1-14tRNA-Phe(gaa)[94027,94099]  
gccgtcatagctcagttggtagagcactggcctgaaaaccagtgccga  
ggttcgagtcctcgtgtcggcac  
1-15tRNA-Val(cac)[94105,94178]  
gtccgttagctcagctggaagagcgtcggccacacccgagaggccgc  
aggttcgalccctgcaatggacac  
1-16tRNA-Lys(ctt)[94297,94369]  
gccttcgtagctcagtggtagagctgtcgcctttaagcgataggtcgtt  
ggttcaaatccagccgggggcac  
1-17tRNA-Glu(ttc)[94373,94448]  
ggtcgggtggtctgttggcaggccggtcgggttttcacccggcgtcatc  
gcgggttcgattcccgctcccactgc  
1-18tRNA-Gly(tcc)[94578,94650]  
gcgggtgtggccgaatggctcaggcaccagacttcattctggctacgca  
ggttcgattcctgtcatccgctc  
1-19tRNA-Thr(cgt)[94710,94784]  
gctgctgtagctcacctggcagagcgtcggcgtcgtatcccgaaggcatc  
cgggttcgagtcggacagcagcccc  
1-20tRNA-Thr(tgt)[94785,94857]  
gcctctgtgtccagcggcacggacatccgccttgaagcggaggacccc  
cggttcgatccgggttagaggctc  
1-21tRNA-Thr(ggt)[95265,95337]  
gtcgggttagctcagtggtagagcgttcctctggtatgggaaaggccgg  
ggttcaatccccgactcagctc  
1-22tRNA-Gly(gcc)[97082,97157]  
gcggttatagctcagcctggccagagcatcacgttgccaacgtgaacgtc  
gcgggttcaaatcccgtagccgctc  
1-23tRNA-Asp(gtc)[97171,97243]  
ggcctgtagctcagaggaagagcacccgcctgtcagcgggaggtcgcg  
gtatcgtaatccgtcagggtcgc  
1-24tRNA-Met(cat)[97303,97375]  
gcctcactagctcattggtagagccgctcgtcataacgtgcaggtacct  
ggttcgattccagggtgaggtac  
1-25tRNA-Ile(gat)[97381,97455]  
gcctgttagcggactggtcgtccgatccaagctgataactggcgtaagc  
ggtgttcgattcaccgagcaggtac  
1-26tRNA-Arg(acg)[97549,97621]  
gcctctatggtccaacggatatgacgccggtctacggaaccggagatgcg  
tgttcgattcgcgctaggggcac  
1-27tRNA-Val(gac)[97664,97736]  
gtccgtgtagctcaggggtagagcgcctgctcgacacgcaggaggaccga  
ggttcgaaacctcgatggacac  
1-28tRNA-Arg(cct)[97910,97983]  
gcctctgtagctcaacggacagagcaacgcggtcctaacgcggtggctgg

aggttcgaatcctctcggaggcac  
1-30tRNA-Gln(ttg)[98524,98599]  
tggggtatggtggcaatctggcagtcgccgaggacttgactccggaggt  
gcaggttcgagtcctgctaccccatc  
1-31tRNA-Arg(tct)[98603,98676]  
gccctttagctcagtgacagagcggcgagcttctacctcgcgggccgg  
gagttcgaatcctccaggggcac  
1-32tRNA-Lys(ttt)[98744,98820]  
gggccggtatcttagtctggtcaaagaagtgacttttaacgcgcgcc  
gtgggttcgaatcccacccggcccacc  
1-33tRNA-Gln(ctg)[126834,126908]  
tgctcgttggtgtaactggcaacactacggactctgactccgtcattta  
ggttcgaatcctaagcgagcagcca  
1-34tRNA-Asn(gtt)[126915,126990]  
tggggtgccgttaatcaggcaaacgagcggactgtaatccgccctgc  
aggttcgaatcctgccacccagcca

>KX781992.1 Mycobacterium phage Gabriel, complete genome

1-1tRNA-Ser(gct)[30695,30778]  
ggagggtgagcatcaggtgatgcagcgagattgctaataccgtacggtaa  
ccaccccgtaggttcgaatcctcctccctccgc  
1-2tRNA-Leu(cag)[30971,31046]  
gctcccgtagcccaattggcaggaggcaccagattcaggatctgggcagt  
tgagttcgaatctcaccgggagtac  
1-3tRNA-Leu(gag)[31166,31240]  
gtctctgtaggcaaatcgaaaagccgcatcttgagggggtggtgcgtg  
cgggttcgactcccgcagagacac  
1-4tRNA-Leu(caa)[31241,31314]  
gccgtggtaggccatctggcgagccgagttcaagtttcggtgtttgc  
gggttcgaatcccggccacgtac  
1-5tRNA-SeC(tca)[66734,66830]  
attctggcactggtggcgagcccaccggcgagcttcaagctgtcgt  
ggccgggagaaccgaccggaacatcccggtcaacgcgacccagggcc  
1-6tRNA-Pro(tgg)[90698,90770]  
cggggtgtagttcagtggaagagcgttggttgggaccaagatgtcgca  
ggttcgaatcctgtcaccccgac  
1-7tRNA-Trp(cca)[90787,90862]  
tggggtgaagccgatctggaaggcagcggtctcaaagccgtctcatagc  
gggttcgaatcccgctacccctgccca  
1-8tRNA-Tyr(gta)[90864,90950]  
gccgcacatgcccaactggtgttgggagcaggctgtaaccctgtggcct  
tcgggacggtgaggttcgattcctcagtcgggtacca  
1-9tRNA-Pyl(cta)[92059,92131]  
gcaccatttgctcaatggcagagcggcggttctaaaaccgtgagtgccg  
gttcgactccggcatggtgcacc

1-10tRNA-Met(cat)[92281,92355]  
agcgggttagagcagctaggtagctcgccgggctcataaaccggaggacg  
cgtgttcgaatcacgccaccgccac  
1-11tRNA-Cys(gca)[92482,92553]  
gcgccttggcggaatggctacgtgctcggtgcaacccgagttatccc  
gttcgactccgggaggcgctc  
1-12tRNA-Glu(ctc)[92558,92632]  
ggtcggttgagtagatggatatctgccaccctctcaagtgagatca  
cgggttcaagtcctacggactgc  
1-13tRNA-His(gtg)[92634,92707]  
gtggccgtagttcagccggtagaacgctgggttgtgatccagtcgtcga  
gggttcgagtcctccggtcaccc  
1-14tRNA-Ala(tgc)[92869,92942]  
gggcctatagctcatctggtagagcgctgccttgcaagcaggaggcggc  
aggttcaagtcctgttaggtccac  
1-15tRNA-Phe(gaa)[93132,93204]  
gccgtcatagctcagttggtagagcactggcctgaaaaccagtgccga  
ggttcgattcctcgtgctggcac  
1-16tRNA-Val(cac)[93210,93283]  
gtccgttagctcagctggaagagcgctcgggtccacaccgagaggccgc  
aggttcgatccctgcaatggacac  
1-17tRNA-Lys(ctt)[93402,93474]  
gccttcgtagctcagtggttagagctgctgcctctaagcgataggtcgtt  
ggttcgaatccagccgggggcac  
1-18tRNA-Glu(ttc)[93479,93555]  
ggtcgggtcggtctgctggatggccagtcggatttctactccgacatt  
cgcgggttcaattcccgtcccgatcgc  
1-19tRNA-Gly(tcc)[93635,93707]  
gcgggtgtggccgaatggctcaggcaccagatttccactctggctacgca  
ggttcgattcctgtcatccgctc  
1-20tRNA-Thr(cgt)[93767,93841]  
gctgctgtagctcacctggcagagcgtcggcgtcgtatcccgaaggcatc  
cgggttcgagtcggacagcagcccc  
1-21tRNA-Thr(tgt)[93842,93914]  
gcctctgtggccagcggcacggacatccgccttgtaagcggaggacccc  
cgttcgatccgggtagaggctc  
1-22tRNA-Thr(ggt)[94322,94394]  
gctgggttagctcagtggttagagcgttcctctggtatgggaaagggccgg  
ggttcaatccccgattcagctc  
1-23tRNA-Gly(gcc)[95717,95790]  
gcgaaggtagctcagctggcagagcggcaccttgccaagtgagggtcgc  
gggatcgtaacccgttcttcgctc  
1-24tRNA-Asp(gtc)[95794,95866]  
ggccctgtagctcagaggaagagcggcgtctgtcgaatcgagggtcgcg

gtatcgtaatccgtcagggtcgc  
 1-25tRNA-Met(cat)[95926,95998]  
 gcctcactagctcattggtagagccgctcgctcataacgtgcaggtacct  
 ggttcgattccagggtaggtac  
 1-26tRNA-Ile(gat)[96004,96078]  
 gcctgttagcggactggcgtccgatccaagctgataactggcgtaagc  
 ggtgttcgattcaccgagcaggtac  
 1-27tRNA-Arg(acg)[96172,96244]  
 gcctctatggccaacggatatgacgccggtctacggaaccggagatgcg  
 tgttcgattcgcgctaggggcac  
 1-28tRNA-Val(gac)[96287,96359]  
 gtccgtgtagctcagggtagagcgcctgctcgacacgcaggaggaccga  
 ggttcgaaacctcgcatggacac  
 1-29tRNA-Arg(cct)[96533,96606]  
 gcctctgtagctcaacggacagagcaacgcggtcctaacgcggtggctgg  
 aggttcgaatcctctcggaggcac  
 1-31tRNA-Gln(ttg)[97147,97222]  
 tggggatgggtggcaatctggcagtcgcccggaacttgactccggaggt  
 gcaggttcgagtcctgctaccccatc  
 1-32tRNA-Arg(tct)[97226,97301]  
 gccctttagctcagtgagcagagcggcgagcttctacctcgccggccgg  
 gattcgaatctctccagggcacca  
 1-33tRNA-Gln(ctg)[124821,124895]  
 tgctcgttggtgtaactggcaacactacggactctgactccgtcattta  
 ggttcgaatcctaagcgagcagcca  
 1-34tRNA-Asn(gtt)[124902,124977]  
 tgggggtgccgtaatcaggcaaacgagcggactgtaatccgccctgc  
 aggttcgaatcctgccaccccagcca  
 >KX664695.2 Escherichia phage ESCO5, complete genome  
 1-1tRNA-Met(cat)[57159,57233]  
 ggccctgtagctcaatgggagagctgtcggctcataaccgatagtagct  
 ggatcgaaaccagccagggccacca  
 1-2tRNA-Arg(tct)[57236,57310]  
 gtctttatgggtgaatggatagcacaggagtcttctaaactcttagtcaa  
 ggttcgattcctgtaaagacacca  
 1-3tRNA-Ser(gct)[57641,57726]  
 ggtagattgggtgaaatggtagccacgacagtttgctaaactgtagtcgga  
 aacggcgtgtaggttcgagtcctacatctaccgcca  
 1-4tRNA-Asn(gtt)[57951,58036]  
 gatgagttggctgaatgggttaagcggcggactgtaatccgtgttcgaa  
 agaacaatataggttcgaatcctatactcatcgcca  
 1-5tRNA-Thr(tgt)[58127,58201]  
 gtcctatagataatggctattacaacggtttgtaatccgtggatctc  
 tgttcgattcagtggtggagcacca

1-6tRNA-Gly(tcc)[58516,58589]  
gcgttcttggtgtagcggtagcattccgtcctccaagtcggcggcacga  
gttcgatcctcgtagaacgctcca  
1-7tRNA-Gln(ttg)[58688,58763]  
tggttttagttagtccgtagcacacgacacttgactgtcgtagggtt  
tggttcaaatccagacagaccagcca  
1-8tRNA-Pro(tgg)[58857,58933]  
cgggacgtagcacagcttgtagtgcgctcgcttgggagcgagaggctc  
agtgttcgaatcactccgtcccgacca  
1-9tRNA-Ile(gat)[58940,59013]  
gttttcgtagttcaatggtagaaccacgactgataatcgtgagacaaa  
gttcgattcttgcgaaacaacca  
1-10tRNA-Met(cat)[59092,59170]  
agcgggatataggagctcgtgctcctcgccagttcatatgctggagat  
cattggttcaaatccaattcccgcctcca

>KX879627.1 Campylobacter phage vB\_CjeM\_Los1, complete genome

1-1tRNA-Tyr(gta)c[38402,38487]  
gtaagcatatgggtaattggtaaccaccagactgtaaactcggcgctctt  
ttggcattgatggttcaaatccatcctcctacacca  
1-2tRNA-Arg(tct)c[38498,38574]  
ctccatgtagctcagctggatagagcaagaatcttctaagttctaggtcg  
ggtgttcaaatcactccatggaggcca  
1-3tRNA-Asn(gtt)c[38584,38658]  
tgcggattagcacagtggtagtgcaatcgactgtaatcgatgggtcata  
ggttcgaatcctatatccgcagcca  
1-4tRNA-Met(cat)c[38752,38826]  
ggcgagtagctcaatggtagagcaaccggctcataaccggttggtata  
ggttcgattcctatttcgcccacca

>KY652726.1 Klebsiella phage vB\_KpnM\_BIS47, complete genome

1-1tRNA-Met(cat)c[42726,42801]  
tgcgggttagaactcaggagttcatcggtctcataagccgaacgaagag  
cagttcgagtctgctacccgcatcca  
1-2tRNA-Phe(gaa)c[43296,43370]  
gcagagatagctgagacgattagcgcttgcctgaagagcttgagaggaa  
ggttcgataccttctctcgcacca  
1-3tRNA-Leu(tag)c[43377,43462]  
gggcaagtggcgggaattggtagacgcactggatttaggttcagcgcct  
tgcggtgtgagagttcgagtctccttgcgccacca  
1-4tRNA-Arg(acg)c[43710,43782]  
gtgggtgtcctgacggacaggcaacggctcagaagccgtttgatgtagg  
ttcagtccttccatccacacca  
1-5tRNA-Pro(tgg)c[43842,43918]  
ctctcttagctcagtttggtagacatctgcttgggagcagagggtcg  
catgttcaagtcgtgaaggagacca

1-6tRNA-Asp(gtc)c[44060,44135]  
ggggatatggtattagcggcaacatactggcctgtcacgccggagtcac  
gggttcgaatcccgttatcctcgcca  
1-7tRNA-Asn(gtt)c[44143,44217]  
ggattggtagctcagaggcagagcgctcgcctgttaagcgaggggtcggg  
atttcgaaactccccctttccgcca  
1-8tRNA-Lys(ttt)c[44278,44353]  
gggtaggtagccgagcggtcaggcattcgccttttaagcgaagagacgat  
gggttcaaatccctcccttcccacca  
1-9tRNA-Ser(tga)c[44362,44450]  
ggagagcaggctgcaaggtgcagacaccggttgaacccgggtcccaccgt  
agcgatacggtagacgtccgattctgttctcttcca  
1-10tRNA-Ile(gat)c[44805,44880]  
gctctgatagttcagttggttagaacaggcgaccgataatcgccaaacac  
tggttcgagtcagttcggagtacca  
1-11tRNA-Ser(gct)c[44887,44972]  
ggaagattggtgaaatggtagccacagcggttgctaaaccgcatccga  
aagggtgtgcaagttcaaccctgcatcttccgcca  
1-12tRNA-Ser(gga)c[45134,45224]  
ggtggaatggtcgagaggttaagacagcaccttggaagggttaggcc  
ccaaaaggggtccgtaggttcgaatcctacttccaccgcca  
1-13tRNA-Gln(ttg)c[45419,45494]  
aggagatggtgtaattggttagcacacgggtcttgaaatccgtagttc  
aggttcaagtcctgatctccctgcca  
1-14tRNA-Glu(ttc)c[45847,45922]  
gctcctatcggctaaatggacaggccgtcagacttcaatctggaaatcc  
gagttcgatcctcgggtgggagtacca  
1-15tRNA-Gly(tcc)c[46005,46081]  
gcgttattagtgtagcgtccagcactccgtcctccaagtgcgaagca  
tcggttcgaatccgatataacgtcca  
1-16tRNA-Ile(gat)c[46172,46247]  
gggagtatagctcagtcagtagagcgctcgaccgataatcgagagtcgc  
aggagcaaagcctgctactcccacca  
1-17tRNA-Tyr(gta)c[46254,46337]  
ggctcgttggcagaatggttattgcagcggattgtaaatccgtgcccttc  
ggggtcctggttcgagtcagggtgggccacca  
1-18tRNA-Cys(gca)c[46776,46849]  
gcacggttgctggagtggaacagcttcggctgcaaaccgaatgtcaggt  
gttcgattcacctaccgtgctcca  
1-19tRNA-Leu(taa)c[47055,47132]  
tgcgtccttggtccaatctggcagaggcatgggtgttaagctcccagggt  
tcccggttcgagtcgggaggcgcatc  
1-21tRNA-Thr(tgt)c[47490,47565]  
gctcgtatagctcagttggtagagcaactccctgttaaggagaaggtcgt



gggttcaagtcctactgcgagcacca  
1-22tRNA-Lys(ctt)c[49792,49867]  
ggggattaacacagcggtagtagcgcccccctaagccgaaggtcga  
aggttcgaatccttcacccccacca  
1-23tRNA-Met(cat)c[50333,50410]  
ggccctcaagctcattaggtatgagcaatcgactcataatcgagaggtag  
gcaggttcgaatcctccggggccacca  
1-24tRNA-Met(cat)c[50414,50486]  
cggtcagtagctcagttggtagagcaggttcttcatacggacaaggtcag  
tggttcaattccactctgaacga

>KY000003.1 Salmonella phage STP07, complete genome

1-1tRNA-Met(cat)[3339,3413]  
ggtcctgtagctcagtggttagagcagccccctcataagggttggtcgct  
ggttcaagtcagccagggtcacca  
1-2tRNA-Asn(gtt)[3826,3901]  
gacgatgtagttcagtcggtagaacggcggctgttaaatcgatgtcgc  
aggttcaagtcctgccatcgtcgcca  
1-3tRNA-Ser(act)[4569,4657]  
ggaaggtgcccagaggtttaagggactcgactactaatcgagtggggc  
tttagcccccgaaggttcgaatccttcacctccacca

>KX961632.1 Bacillus phage SBP8a, complete genome

1-1tRNA-Asn(gtt)[32688,32761]  
gtgctttagctcagtcggttagagctggtaggtgttaaccactgtgtcgt  
aggttcgattcctacctagcacgc  
1-2tRNA-Glu(ttc)[32768,32844]  
gtcgcatgggtgaaattggttaacacactcggtttctaccgaggattta  
ggggttcgagccccctatgcgattcca  
1-3tRNA-Asp(gtc)[32849,32922]  
tggggatataggttagaggtaaacacgcacggctgtctaccgtgaagcac  
gagttcgaatctcgttatcctcgt

>KX961629.1 Bacillus phage BJ4, complete genome

1-1tRNA-Asn(gtt)[32254,32327]  
gtgctttagctcagtcggttagagctggtaggtgttaaccactgtgtcgt  
aggttcgattcctacctagcacgc  
1-2tRNA-Glu(ttc)[32334,32410]  
gtcgcatgggtgaaattggttaacacactcggtttctaccgaggattta  
ggggttcgagccccctatgcgattcca  
1-3tRNA-Asp(gtc)[32415,32488]  
tggggatataggttagaggtaaacacgcacggctgtctaccgtgaagcac  
gagttcgaatctcgttatcctcgt

>KX961630.1 Bacillus phage QCM8, complete genome

1-1tRNA-Cys(gca)[26999,27071]  
gaggatgtaccgaagcggctaacggcttagactgcaaatctagtgttcac  
gggttcgagtcctcattctct

1-2tRNA-Asn(gtt)[27086,27161]  
gtgcctgtagctcagtcggtagagcaaacctgttaagggtgaggtcgt  
aggttcgagccctaccaggtacgccca  
1-3tRNA-Gly(tcc)[27354,27429]  
ggggcattagtatattggttcattattcctggctccaaccaggggaggt  
cggttcgactccgacatgtccctcca  
1-4tRNA-Asp(gtc)[27434,27506]  
tggggtattagtttagtggtaaaatactgcactgtctatgcagagtcagg  
ggttcgactcccctataacctcgt  
1-5tRNA-Glu(ttc)[27623,27698]  
tgtcccggttggtgaaattggctaacacactcggctttctaccgagcattc  
gcaggttcgaatcctgtacgggatat  
1-6tRNA-Gln(ttg)[27822,27894]  
tttcggagtagccaagtggtaaggcaatagactttgactctatgatcgggt  
ggttcgataccatcctccgaagt  
1-7tRNA-His(gtg)[28051,28123]  
cagggtgtggtgaagtggtaaacacgggcgattgtggctcgtccattcga  
gggttcgaltccctcctccctga  
1-8tRNA-Pro(tgg)[28131,28203]  
gtgggtgtaggctagaggtcagtcactgcgttgggacgcaggatacgca  
cggttcgaatcgtgccaccgcac  
1-9tRNA-Phe(gaa)[28308,28380]  
ggacggatagctgagatggattagcgaaggattgaaaccccttagaggtt  
ggatcgttaccactctgtccac  
1-10tRNA-Tyr(gta)[28506,28588]  
gggtcagtcgcatagtggaattgcaggagactgtaaatctccccgaaa  
ggttcgttggttcgagtcgaacctgaccacca  
1-11tRNA-Leu(tag)[28594,28679]  
tgccgaagtgggtgaattggtatacacgcagcacttaggatgctgtgccc  
tagaggattgaggggttcgacccctccttcggtatc  
1-12tRNA-Trp(cca)[28717,28789]  
tgggggtttagtttagtggtaaaatttggctccaacaccaaagtccaa  
ggttcgaatccttgcgcctcgt  
1-13tRNA-Met(cat)[28796,28868]  
aggagcatagctcagtggtagtagcgggtgtctacacgcaccaggtcga  
aggttcgaatccttctgttccta

>KY630163.1 Salmonella phage S8, complete genome

1-1tRNA-Ser(gct)c[97599,97687]  
ggaaggttccccgagaggtttaagggactcgactgtaatcgagtggggc  
tttagccccgaaggttcgaatccttcacctccgcca  
1-2tRNA-Tyr(gta)c[97764,97847]  
gtgagtgtggcagagcggtcgaatgcaggagactgtaaatctccccgtaa  
cagcgcggtggttcaatccatccactcacacca  
1-3tRNA-Asn(gtt)c[98605,98680]

gacgatgtagttcagtcggtagaacggcggctgttaaactgtatgtcgc  
aggttcaagtcctgtcatcgtcgcca  
1-4tRNA-Met(cat)c[99093,99168]  
ggccccgtagctcagtggttagagcagtcgactcataatcgattggtcgc  
tggttcaagtcagccagggtcacca

>KX831080.1 Mycobacterium phage Lukilu, complete genome

1-1tRNA-Ser(gct)[30369,30452]  
ggagggtgagcatcaggtgatgcagcgagattgctaataccgtacggttaa  
ccaccccgtaggttcgaatcctcctccctccgc  
1-2tRNA-Leu(cag)[30645,30730]  
gcctcggtagcgtaatggaagccgtgctgcactcagactgcagtgccga  
aaggcgtaggggttcgactccctcccagggtacca  
1-3tRNA-Leu(gag)[30732,30805]  
gcccctgtatcccaacggcagaggaagcggctctgagaggccgttcagtga  
gggttcgaatccctctgggggcac  
1-4tRNA-Leu(caa)[30806,30880]  
gccgcagtatgcaaaccggaagcagccgtactcaaatgcggtgcgtg  
cgggttcgatccccgcctgcggtac  
1-5tRNA-SeC(tca)[68732,68828]  
attctggcactggtggcgagcccaccggcgagcttcaagctgtcgt  
ggccggagaatcgaccggaacatcccggtcaacgcgacccagggcc  
1-6tRNA-Pro(tgg)[92494,92568]  
cggggtgtagttcagtttgaagagcgttggtttgggaccaagatgtcg  
caggttcgaatcctgtcaccccgac  
1-7tRNA-Trp(cca)[92583,92653]  
gggtctgtgcacagggtgcccgcaggtctcaaagccgaaggcgggggtt  
cgattccctccaggcctgcca  
1-8tRNA-Tyr(gta)[92655,92741]  
cccgatcatgcccactggtgttgggagcaggctgtaaccctgtggcct  
tcgggacggtaggttcgattcctcagtcggggacca  
1-9tRNA-Pyl(cta)[93855,93927]  
gcaccatttgctcaatggcagagcggcggttctaaaaccgtgagtgccg  
gttcgactccggcatggtgcacc  
1-10tRNA-Met(cat)[94077,94151]  
agcgggtgtagagcagctaggtagctcgccgggtcataaccggaggacg  
cgtgttcgaatcacgccaccgccac  
1-11tRNA-Cys(gca)[94278,94349]  
gcgccttggcggaatggctacgtgctcggtgcaacccgagttatcccg  
gttcgactccgggaggcgctc  
1-12tRNA-Glu(ctc)[94354,94428]  
ggtccgttgagtagatggatatctgccaccctctcaaggtggagatca  
cgggttcaagtcctgacggactgc  
1-13tRNA-His(gtg)[94430,94503]  
gtggccgtagttcagccggtagaacgtgggttgtatccagtcgtcga

gggttcgagtcctccggtcacc  
1-14tRNA-Ala(tgc)[94665,94739]  
gggcctgtagctccaattgtagagcagcatccttgaagatgacggctg  
tcggttcgaatccgacctggtccac  
1-15tRNA-Phe(gaa)[94929,95001]  
gccgtcatagctcagttgtagagcactggcctgaaaaccagtgccga  
ggttcgattcctcgtcggcac  
1-16tRNA-Val(cac)[95007,95080]  
gtccgttagctcagctggaagagcgctcggccacacccgagaggccgc  
aggttcgatccctgcaatggacac  
1-17tRNA-Lys(ctt)[95200,95273]  
gccttcgtagctcagttgtagagctctgcctttaagcgagatgtcgc  
aggttcgacccctgccggaggcac  
1-18tRNA-Glu(ttc)[95278,95354]  
ggtcgggtcggctcgtggtatggccagtcggatttctactccggacatt  
cgcggttcaattcccgtccgatcgc  
1-19tRNA-Gly(tcc)[95434,95506]  
gggggtgtggccgaatggctcaggcaccagatttccactctggctacgca  
ggttcgattcctgtcatccgctc  
1-20tRNA-Thr(cgt)[95566,95640]  
gctgctgtagctcacctggcagagcgtcggcgtcgtatcccgaaggcatc  
cggttcgagtcggacagcagcccc  
1-21tRNA-Thr(tgt)[95641,95713]  
gcctctgtgtccagcggcacggacatccgccttgaagcggaggacccc  
cgttcgatccgggtagaggctc  
1-22tRNA-Thr(ggt)[95773,95845]  
gctgggttagctcagtggtagagcgttcctctggtatgggaaaggccggg  
ggttcaatcccccgactcagctc  
1-23tRNA-Gly(gcc)[97168,97241]  
gcgaaggtagctcagctggcagagcgccaccttgccaaggtggaggtcgc  
gggatcgtaacccgttcttcgctc  
1-24tRNA-Asp(gtc)[97245,97317]  
ggccctgtagctcagaggaagagcgccggtctgtcgaatcgaggtcgcg  
gtatcgtaatccgtcagggtcgc  
1-25tRNA-Met(cat)[97377,97449]  
gcctcactagctcattgtagagccgctcgtcataacgtgcaggtacct  
ggttcgattccagggtgaggtac  
1-26tRNA-Ile(gat)[97455,97529]  
gcctgttagcggactggtcgtccgatccaagctgataactggcgtaagc  
ggtgttcgattcaccgagcaggtac  
1-27tRNA-Arg(acg)[97623,97695]  
gcctctatggtccaacggatatgacccggtctacggaaccggagatgcg  
tgttcgattcgcgctaggggcac  
1-28tRNA-Val(gac)[97738,97810]

gtccgtgtagctcagggtagagcgctgctcgacacgcaggaggaccga  
ggttcgaaacctcgcatggacac  
1-29tRNA-Arg(cct)[97984,98057]  
gcctctgtagctcaacggacagagcaacgcggctctaacgcggtggctgg  
aggttcgaatcctctcggaggcac  
1-31tRNA-Gln(ttg)[98598,98673]  
tggggtatgggtgcaatctggcagtcgccgacgttgactccggaggt  
gcaggttcgagtcctgctaccccatc  
1-32tRNA-Arg(tct)[98677,98752]  
gccctgtagctcagtgagacagagcggcgagcttctacctcgccggccgg  
gagttcgaatcctcaggggcacca  
1-33tRNA-Gln(ctg)[126638,126712]  
tgctcgttggtgtaactggcaacactacggactctgactccgtcattta  
ggttcgaatcctaagcgagcagcca  
1-34tRNA-Asn(gtt)[126719,126794]  
tggggtgtccgttaatcaggcaaacgagcggactgtaatccgccctgc  
aggttcgaatcctgccaccccgacca

>KX828711.1 Shigella phage SH7, complete genome

1-1tRNA-Arg(tct)c[67336,67411]  
cggggcatagctcagaaggaagcaaggaccttctaagtcctaggtcgt  
aggttcgatccctactgcctcgacca  
1-2tRNA-His(gtg)c[67416,67491]  
gtggccgtagttcagttggtagaactcgagattgtgattctcgtagtcac  
gggttcgactcccatcggtcacccca  
1-3tRNA-Asn(gtt)c[67606,67680]  
ggatgtgtagctcaatggcagagcgatcgctgtaagcgattgggtata  
ggttcgaatcctatcacgtccgcca  
1-4tRNA-Tyr(gta)c[67685,67771]  
ggggagtatcccgtagaggtagcgggtggactgtaaatccattgtcat  
tgcgactcgggtggttcgactccatcactccccacca  
1-5tRNA-Met(cat)c[67785,67859]  
ggccctgtagctggaaggtcaagcaagcgactcataatcgccagatggt  
ggttcaattccactagggccacca  
1-6tRNA-Thr(tgt)c[67861,67936]  
gctgatttagctcagtaggtagagcaactcactgtaatgagaaggtcgg  
cggttcgattccgtcaatcagcacca  
1-7tRNA-Ser(tga)c[67942,68031]  
ggaggcgtggcagagtggttaatgcaccggtcttgaaccggcagtcg  
ctccggcgactcataggttcaaatcctattgcctccgcca  
1-8tRNA-Pro(tgg)c[68033,68107]  
ctccgtgtagctcagtttgtagagcgctgattgggatcaggaggtcc  
aaggttcaaatccttgatggagac  
1-9tRNA-Gly(tcc)c[68118,68191]  
gcggatatgtataatggcattacctcagacttccaatctgatgatgtga

gttcgatttcattatccgtcca  
1-10tRNA-Leu(taa)c[68197,68283]  
gcgagaatggtcaaattggtaaaggcacagcacttaaaatgctgcggaat  
gatttccttgggttcgagtccttctcgacca  
1-11tRNA-Gln(ttg)c[68284,68357]  
tgggaattagccaagttggaaggcactggattttgattccaggatgcaa  
aggttcgagtcctttattcccagc

>KY000079.1 Acinetobacter phage AM24, complete genome

1-1tRNA-Tyr(gta)[23966,24047]  
tagtagtgcccgagtggtcgaaggggtggactgtaaattcattatc  
acacgttgggtcgaatccaacctgctacacca  
1-2tRNA-Ile(gat)[24492,24566]  
agtaccttagttcagtggtagaacgcagaactgataattctgaggtcgat  
ggttcgaaacctcaggtactacca  
1-3tRNA-Asn(gtt)[24708,24781]  
tctagtgtagcacaaaggtagtgagcagattgtaaatctgttggtgtt  
ggttcgaatccagcctctagagcc  
1-4tRNA-Asp(gtc)[25572,25647]  
ggctctgtagcatagtgattatgcgactccctgtctaggagaaaaacgc  
cagttcgagtcgtcagagtcgcca  
1-5tRNA-Gln(ttg)[25652,25726]  
tgtcgtatggtgtaatggtagcacagaagactttgactcttctagtta  
ggttcgagtcctaattcgactgcca  
1-6tRNA-Ala(tgc)[25730,25801]  
gggtcactagcacaaatggtagtgagttgcttgcagcatcaggttaag  
ggttcgagtccttgtgtatcc  
1-7tRNA-Glu(ttc)[25808,25882]  
attcctatcgaacaatggttagtcgctggactttcactccagaaatc  
ggttcaaatccgttaggaatacca  
1-8tRNA-Lys(ttt)[25885,25961]  
aggacgttagctcagttggttagagcaagagcctttaagttcaggtca  
taggttcaaatcctatacgtcctacca  
1-9tRNA-Phe(gaa)[26316,26390]  
gcacaagtagcttagatggattagcgtaacctgaaaaggttgagaggtt  
ggatcgttaccacattgtgcacca  
1-10tRNA-Val(tac)[26601,26676]  
gattccttagctcaattggtagagcattcccttacaaggaagaggtcgt  
aggttcgaaacctacaggaatacca  
1-11tRNA-Ser(tga)[26680,26770]  
ggaggaataatccgagttggcctaacggatgctgtcttgaatacagtttag  
gtgtaatagccgtgtgagttcgagtcactttctccgcca  
1-12tRNA-Gly(tcc)[26772,26845]  
gcgtctatagttagtggaacaccctgtactccaattcagtatcttcg  
gttcgaatccgaatggacgtcca

1-13tRNA-Pro(tgg)[27000,27076]  
 ctctgttagctcagtttggtagagcactcgcttgggagtgaggggtcg  
 taagttcaattcttactacagagacca  
 1-14tRNA-Leu(tag)[27083,27159]  
 gggtagttgaagggaatggcataccttcacgcttagaacgtgaagttc  
 tgagttcgagttcagactacctacca  
 1-15tRNA-Leu(taa)[27166,27241]  
 ggggatatagcccaacggcagaggcaagaggtttaaacctctcaagtt  
 cagttcgagttcgaatacctacca  
 1-16tRNA-Thr(tgt)[28132,28206]  
 tccgaattagctcaatggtagagcagcgctttgtaatgcgaaggtgtg  
 tgttcgactcacatattcggaacca  
 1-17tRNA-Met(cat)[28212,28287]  
 ggtccttagcacatactggtctgtgcacatgctcataacgtggaggat  
 tttggttcgattccaaaaggaccac  
 1-18tRNA-Met(cat)[28463,28537]  
 agcgaggtagtgtaacggttgcacaggggactcataatcctctggttg  
 ggttcgaatcccaacttcgctcca  
 >KY000080.1 Klebsiella phage KPV15, complete genome  
 1-1tRNA-Thr(tgt)c[77431,77506]  
 gccgatttagctcagctggtagagcgcttcacttgtaatgaagatgtcgc  
 ggttcgactcctgcaatcggcacca  
 1-2tRNA-Leu(taa)c[77607,77691]  
 gcatcgatggtggaactggtatacacaggagactaaaatctcccgccgc  
 aaggattgaggggtcgaatccctctcgtgcacca  
 1-3tRNA-Arg(tct)c[77696,77772]  
 cgggcatagctcagttgtagagcagcggacttctaataccgcaggtcg  
 aaggttcgaatcctctgcctcgacca  
 1-4tRNA-Met(cat)c[79153,79229]  
 ggccctgtagctcaattgtagagcggtccctcataagggttggttc  
 atgttcgagctttgccagggtcacca  
 1-5tRNA-Pro(tgg)c[80497,80573]  
 ctccgtagctcagttgtagagcgctccattgggatggagaggtcg  
 aatgttcgagtcattctatggagacca  
 1-6tRNA-Gly(tcc)c[80579,80653]  
 gcatccatcgatatgcgatattatgtctggctccaccagaagatagg  
 agttcgattctcttggatgctcca  
 1-7tRNA-Trp(cca)c[80659,80733]  
 aggttcttagtataacggctattatgctgggtccaaaccagtgatgag  
 ggttcgattccttcagggcctgcca  
 1-8tRNA-Ile(gat)c[80740,80815]  
 gggagtatagctcatttggtagagctctcgaccgataatcgagcggtagc  
 tgggtcgagtcagttactcccacca  
 1-9tRNA-Ser(tga)c[80882,80966]

ggagagtagcgctagtggtagcaaaccggacttgaaatccgggccatcgg  
aaacggtaggggttcaactccttactctccgcca  
1-10tRNA-His(gtg)c[81064,81139]  
gtggccgtagttcagttggtagaactcgagattgtgattctcgtagtc  
gggttcaactcccatcggtcacccca  
1-11tRNA-Gln(ttg)c[81235,81309]  
tgaatcatagccaagttggaaggcagtaggtttgatcctacgatccct  
ggttcgagtcagggtggttcagcca  
1-12tRNA-Met(cat)c[81316,81392]  
tgccgggtaactcagttggtagaatgtgggctcatatcccacacgcg  
caggttcgagtcctgcctccgcctcca  
1-13tRNA-Asp(gtc)c[81554,81629]  
ggacatatagtttcagcggttaaaatactgcctgtcacgcgagagtcac  
ggattcgaattccgttaggtccgcca  
1-14tRNA-Asn(gtt)c[81883,81967]  
gggtcgttggtgagagggtgaagcgacggactgtaatccgtgcagaaa  
tgactaggcaggttcgatacctgcacggccccgcca  
1-15tRNA-Lys(ttt)c[81973,82049]  
gggatactagctcagttggttagagcaccggacttttaacccgggtgtcc  
gaagttcgagtcctcgggtgtccacca  
1-16tRNA-Tyr(gta)c[82056,82142]  
ggggagttagaccgtaggggtagcgggacagactgtaaatctgtgctca  
aaaggctcgagtggttcgactccattactccccacca

>KY000083.1 Pseudomonas phage PA10, complete genome

1-1tRNA-Gln(ttg)[67563,67636]  
tgccgcttcgttcaatggtaggacgccagactttgaatctggagatgatg  
gttcgatcccatcagcggctgcca  
1-2tRNA-Arg(tct)[67942,68017]  
gctcgtatagttaatggatagcacaacggcttcttaagccgtaaggtct  
aggttcgaatcctagtatgagcgcca  
1-3tRNA-Lys(ttt)[68028,68103]  
tggacggaagctaaagtggatagcgcggcttttaacccgactatagt  
gagttcgagtcacccgttcaacca  
1-4tRNA-Leu(tag)[68366,68450]  
ggccctgtggtggaattggtatacacatcagtcctagaaactgacgccga  
gaggattgagggttcaagtcctccggggccacca  
1-5tRNA-Ile(gat)[68661,68736]  
ggccagatagctcaattggttagagcaccgaccgataatcgggtggttga  
aggttcaagtccttcttgccacca  
1-6tRNA-Asp(gtc)[68746,68824]  
ggcccattagctcagtcaggactagagcaagcccctgtctagggaaggt  
cgtcgggtcgaatccgacatgggtcgcca  
1-7tRNA-Met(cat)[68925,68999]  
agcggttaagactggctggcgtgtcactcgggtcataaccgaatacaagt



ggttcgattccacctctcgcttcca  
1-8tRNA-Cys(gca)[69234,69309]  
ccccggttgccgagaggttaggcggcgattgcaaatccgtctcacat  
cggttcaaatccgatacgcggctcca  
1-9tRNA-Asn(gtt)[69320,69395]  
tgggatgtagctcagttggttagagcaggagctgtaactctcaggtcgc  
aggttcgagccctgccgtcccagcca  
1-10tRNA-Pro(tgg)[69459,69536]  
ctctcgtagctcagctcgtttagagtgtcggatttggaaatccgaaggtc  
gaaggttcaaatcctccgggtgacca  
1-11tRNA-Gly(tcc)[69543,69618]  
gcgggtatagctcagttggttagagcgtctgcctccaagcagttcgtcgt  
cggttcgagtcgctctatccgctcca  
1-12tRNA-Phe(gaa)[69625,69701]  
gggactgtagctcagaaggttagagcggtaggtgaaatcccacaggtcg  
ggcggttcgattcgccccgggtcccacca  
1-13tRNA-Glu(ttc)[69708,69783]  
gcagttatagattaattgggtaaatcgccagactttcaatctggtgtcc  
gggttcgatccccggttaactgctcca  
1-14tRNA-Thr(tgt)[70105,70179]  
gccctttaagcatttatggtgatgcaccggttgaacccggcgaattc  
tgtcaagtcaggaatggggcacca

>KY073228.1 Pseudomonas phage Zigelbrucke, complete genome

1-1tRNA-Gln(ttg)[21733,21806]  
tgccgcttcgttcaatggtaggacgccagacttgaatctggagatgatg  
gttcgatcccatcagcggctgcca  
1-2tRNA-Arg(tct)[22112,22186]  
gctcgtatagttaattggatgcacaacggccttctaagccgtaaggtcta  
ggttcgagtcctagtagcagcgcca  
1-3tRNA-Lys(ttt)[22196,22271]  
tggacggaagctaaagtggataggcatctggcctttaaccagactatagt  
gagttcgagtctcaccgtccaacca  
1-4tRNA-Leu(tag)[22546,22630]  
ggcctgtggtggaattggtatacacatcagtccttagaaactgacgccga  
gaggattgagggtcaagtcctccggggccacca  
1-5tRNA-Ile(gat)[22839,22914]  
agccgगतagctcaattggtagagcaccgaccgataatcggtggtga  
aggttcaagtccttctctggctacca  
1-6tRNA-Asp(gtc)[22924,23002]  
ggccattagctcagctcggactagagcaagcccctgtctagggaaggt  
cgccggttcgaatccggcatgggtcgcca  
1-7tRNA-Met(cat)[23103,23177]  
agcgftaagactggctggagctgtcactcggctcataaccgagcacaagt  
ggttcgattccacctctcgctacca

1-8tRNA-Cys(gca)[23457,23532]  
 cccgcgtggccgagaggttaggcggcggttgcaaatccgtctcacat  
 cggttcaaatccgatacgcggctcca  
 1-9tRNA-Asn(gtt)[23543,23618]  
 tgggatgtagctcagttggttagagcaggagctgtaactctcaggtcgc  
 aggttcgagccctgccgtcccagcca  
 1-10tRNA-Pro(tgg)[23682,23759]  
 ctctcgtagctcagctcggtagagtcggatttggaatccgaaggtc  
 gaaggttcaaatccttcggggtgacca  
 1-11tRNA-Gly(tcc)[23766,23841]  
 gcgggtatagctcagttggttagagcgtctgcctccaagcagttcgtcgt  
 cggttcgagtcctctatccgctcca  
 1-12tRNA-Phe(gaa)[23848,23924]  
 gggactgtagctcagaaggttagagcgggtggattgaaatcccacaggtcg  
 ggcgttcgattcggccgggtcccacca  
 1-13tRNA-Glu(ttc)[23931,24006]  
 gcagttatagattaattggttaaatgccagactttcaatctggtgttcc  
 gggttcgalccccggtaactgctcca  
 1-14tRNA-His(gtg)[24067,24141]  
 gtggagattgtgtagcccggatgctgccttcggtgtgacccgattgtt  
 ggggttcgagtcggcctccaacc  
 1-15tRNA-Thr(tgt)[24328,24402]  
 gccctttaagcatttatggtgatgcaccggcttgaacccggcgaattc  
 tgttcaagtcaggaatggggcacca

>AP017925.1 Ralstonia phage RP31 DNA, complete genome

1-1tRNA-Asn(gtt)[128734,128809]  
 tccgaggtagctcagtcggtagagcagcggcctgtaagccgttggtcgc  
 tggttcgaaccagcccttgagcca  
 1-2tRNA-Ser(aga)[267002,267096]  
 ggtaaaaaagcgtgtggttaccagcgcctcagatagagctcagctgtt  
 cagcaaggaacttatccttgatctggttcagcccatagttgacct

>KY549443.1 Enterococcus phage EFP01, complete genome

1-1tRNA-Arg(tcg)[105868,105941]  
 ttgttaggtcgtctaacaggtgaagacacaattctcgaaattgtgatac  
 aggttcgaaccctgtcctgacagt  
 1-2tRNA-Trp(cca)[107475,107548]  
 tgcgctgttggtgtagtggtatcattccggctccaacccggaagacgg  
 gggttcgaatccttcacggcgtgt  
 1-3tRNA-Thr(tgt)[107690,107763]  
 gctgatattccgtaattggtaacgggacacacttgtaatgtgtatactt  
 taggttcgagtcctagatcagca  
 1-4tRNA-Lys(ctt)[107955,108030]  
 tatctccttagctcagttggtgtagcacctgattcttaacagggggtc  
 acaggttcgaatcctgtaggggat

1-5tRNA-Lys(ttt)[108163,108239]  
 tgtctccatagctcaatcggttagagcactcgactttaatcgaggggtt  
 cggggttcaaaccctgtggggacatc  
 1-6tRNA-Arg(acg)[108338,108410]  
 cggcagttcgtccaattggctaggatgctagactacgaatctagtatag  
 aggttcgaltcctctgctgtcgg  
 1-7tRNA-Ser(gga)[112142,112228]  
 ggaaggttactcaaacggtaaaggcttggttggaaccaagtagatgt  
 gtaacagcatgtgtgggtcgaatcccatgccttcca  
 >KY363465.1 Providencia phage vB\_PreS\_PR1, complete genome  
 1-1tRNA-Met(cat)c[28385,28460]  
 ggttctatagctcagtcggtagagcgtcgttcatacggcgtgtgtcgc  
 tggttcgattccagctagaacctcca  
 1-2tRNA-Gln(ttg)c[28588,28663]  
 tggggaatggtgtaggtggttagcacatcagccttgactctgacagcgt  
 ggggtcgaatcccgcttcccccttcca  
 1-3tRNA-Met(cat)c[28670,28752]  
 agcgagttagattctgggaactcaggaggctcatlccctccggcaatag  
 ccaagatcggttcgattccggtactcgcaacca  
 1-4tRNA-Ser(tga)c[29978,30066]  
 ggtaggagtgcccaatggtgggcagcctgacttgaaatcaggtacgttg  
 ggggacacggcgggggttcgattcctcctctaccgcca  
 1-5tRNA-Trp(cca)c[30927,31000]  
 atgggcttcgtatagtggtattaccttggttccaaaccaacgacgggg  
 gttcgattcctccagcccgtgcca  
 1-6tRNA-Ser(gga)c[31761,31849]  
 agaacaaccgatcggcgacgggaactgcttgaaagcagctgagtatag  
 cgatatgccttgtgggttcgactcccacttcttctgcca  
 1-7tRNA-Leu(tag)c[31859,31935]  
 gggactatgacggaactggcatagctgtgtgcttagaacgcagatttta  
 ggagttcgactctccttagtcccacca  
 1-8tRNA-Leu(taa)c[32072,32148]  
 gtcgaggtgacgtaattggcaaactacagcactaaaatgctggttctg  
 cgggttcgatccccgcctcgatacca  
 1-9tRNA-Gly(tcc)c[33985,34060]  
 gcgtgcgtaagatagcggctattcggtcgggcttccaacccgtacagcag  
 ggggttcgagtcacctcgcccgcgcca  
 1-10tRNA-Asn(gtt)c[35038,35122]  
 ggggtggttagctgagtggttagcgacggactgttaatccgtgttcgaaa  
 ggacaacgtaggttcaaactctacaccgcccgcga  
 1-11tRNA-Ile(gat)c[35129,35205]  
 actgcgatagctcagttggtagacgcttgactgataatcgagaggttcc  
 ctggttcaaaccaggtcgcagtacca  
 1-12tRNA-Glu(ttc)c[35508,35585]

actgtagtggacaaactggtaaagtcaccaccctttcaagtgaggcatt  
gagggttcgactcccttctacagtcca  
1-13tRNA-Tyr(gta)c[35666,35750]  
gcaggattagtctagcggcaatgacaggagactgtaaatttcacccctc  
ggggttccgtggttcgagtcacgatcctgcacca  
1-14tRNA-Arg(acg)c[35840,35915]  
gcatgcttaactcagtggaacagagtcttcgctacgaacgaagtggcac  
aggttcgaatcctgtagtgtgctcca  
1-15tRNA-Thr(tgt)c[36098,36173]  
gttgacgtagctcagttggtagagcagttgccttgtaagcatcaggtcgc  
aggttcgatgcctgtcgtcagcacca  
1-16tRNA-Val(tac)c[36179,36252]  
actcgcttagtataacggtagtgctagtcctttacacggactaagcggtg  
gttcgattcctccagcagtagca  
1-17tRNA-His(gtg)c[36478,36555]  
gtggcggtagcagaattggttaatgccccgattgtgattcgggaatgt  
gcgggttcaagtcctccgtcacccca  
1-18tRNA-Phe(gaa)c[36696,36770]  
gcaccgttagctgagatggattagcgcaggttgaagagcctgatagagt  
ggttcgataccactatggtgcacca  
1-19tRNA-Asp(gtc)c[36776,36852]  
aggtatgaggtcgaaatggacaagacaccgcactgtcactcggagatag  
cgggttcgatccccgtcatacctgcca  
1-20tRNA-Ala(tgc)c[36859,36934]  
ggggatgtagctcaattggtagagcacctgcttgcaagcagacggttag  
gggttcaaatccccttttctccacca  
1-21tRNA-Pro(tgg)c[36942,37018]  
ctcggattagctcagtcgtgtagagtacgccgttggggcggtggggtca  
aaggttcaaatcctttattcgagacca  
1-22tRNA-Ser(gct)c[37477,37570]  
ggaagagtaaccctaattggaagggaactgttgctaaacagtttagtagc  
tgtcgaaaagacggtgtgcgggttcgagccccgcttcttctcca  
1-23tRNA-Lys(ttt)c[38288,38363]  
gcgtcgttagctcaattggcagagcaagggttttaatcccaggttgt  
aggttcgactcctatacggcgtacca  
1-24tRNA-Met(cat)c[40456,40531]  
gcaccagtagcttaattggtagagcgtgcccctcataagggttggtgtg  
ggttcgagtcctcctaggtgcacca  
1-25tRNA-Arg(tct)c[41390,41464]  
gtccccttagtctagaggatagcatcggcttctaaaccgatatacata  
ggttcgaatcctataggggacgcca

>KT995480.1 Bacillus phage BM15, complete genome

1-1tRNA-Ser(gct)[29057,29145]  
ggaagggtactcaagttggtgaagaggtcagtttgctaaactgatagtac

ctattacaggtagcaagggttcgaacccctttcctcca  
1-2tRNA-Cys(gca)[29156,29229]  
gagggtgtaccgaagcggctcaacggcacagattgcaaccctgtgttcg  
tgggttcaaatcccaccatcctct  
1-3tRNA-Asn(gtt)[29275,29350]  
gtgctttagctcagtcggtagagctggaggctgtaaccactgtgtcgt  
tggtcgattccaacctagcacgcca  
1-4tRNA-Gly(tcc)[29354,29428]  
ggggcattggtatattggctattactcttggctccaaccaagcaaggtc  
ggttcgactccgacatgtccctcca  
1-5tRNA-Thr(tgt)[29435,29511]  
gccttcttagctcagttggttagagcgactgccttgaagcagtaggtcg  
tgggttcgaatcctacagtcggcacca  
1-6tRNA-Asp(gtc)[29517,29590]  
ggctcgttagtttaacggtaaaatactgcactgtctatgcagggtcacgg  
gttcaactcccgtacgggtcgcca  
1-7tRNA-Glu(ttc)[29599,29675]  
tgtcgattggtgaaattggctaacacactcggctttctaccgagcattc  
aggggttcgaatcccctatgcgatc  
1-8tRNA-Arg(tct)[29769,29844]  
taccctttagccaagtgactaaggcatcgggcttctatcccgtagatc  
gtgggttcgattcctacaggggtgt  
1-9tRNA-Ser(tga)[29850,29935]  
cgggaataactcaaatggttaagagggtagtcttgaaaactactaggcgt  
gaaagcgtgcgggggttcgaatccctcttctcgcgc  
1-10tRNA-Gln(ttg)[30015,30090]  
tttcggtgtggacaaactggtaaagtcgtcaggctttgaccctgaagttt  
ggaggttcgacccttccaccgaagt  
1-11tRNA-His(gtg)[30168,30241]  
cagtggtgtgaagtggcttaacacggacgactgtggatcgttcattcg  
caggttcgaatcctgtcatgctga  
1-12tRNA-Pro(tgg)[30339,30410]  
gtagatgtaggctagaggtcagtcactccgttggggcggaggtcacgca  
ggttcgatccctccatctgca  
1-13tRNA-Phe(gaa)[30513,30587]  
ggacagatagctgagacggattagcgattggctgaaaaccaatagaggtt  
ggatcgttaccactctgtccacca  
1-14tRNA-Tyr(gta)[30594,30676]  
gggcgtgcaatcattggagagataagctgactgtaaatcagtggtcattg  
actgtgaagggtcgaatccttccattccacca  
1-15tRNA-Leu(taa)[30678,30764]  
atcggaatgttggaattggtagacataacggactaaaaatccgttgcctc  
ttggggcgtgagggttcgagtcctcttccgatacca  
1-16tRNA-Ile(gat)[30766,30840]

actagtgtagctcagaggtagagcagtgctcttgataaggcattggtcgtt  
ggttcgatcccaaccactagtagca  
1-17tRNA-Leu(tag)[30850,30934]  
gtcagagtgttggaactggatatacatgcggcacttagaatgccgtgcctt  
cgggattgtgggttcgactcccacctctgacacca  
1-18tRNA-Met(cat)[31029,31103]  
tacgggtatagctcagtggttagagtggtggtctcataagcccaaggcga  
tggttcaatcccatctaaccgtatc

>KY290975.2 Escherichia phage YUEEL01, complete genome

1-1tRNA-Arg(tct)c[68828,68903]  
cggggcatagctcagaaggaagagcaaggaccttctaagtcctaggtcgt  
aggttcgatccctactgcctcgacca  
1-2tRNA-His(gtg)c[68908,68983]  
gtggccgtagttcagttggtagaactcgagattgtgattctcgtagtc  
gggttcgactcccatcggtcacccca  
1-3tRNA-Asn(gtt)c[69098,69172]  
ggatgtgtagctcaatggcagagcgatcgctgttaagcgattggtata  
ggttcgaatcctatcacgtccgcca  
1-4tRNA-Tyr(gta)c[69177,69263]  
ggggagtatcccgtagaggtagcgggtggactgtaaatccattgtcat  
tgcgactcgggtggttcgactccaccactccccacca  
1-5tRNA-Met(cat)c[69273,69347]  
ggccctgtagctggaaggtcaagcaagcgactcataatcgccagatggt  
ggttcaattccaccaggccacca  
1-6tRNA-Thr(tgt)c[69349,69424]  
gctgatttagctcagtaggtagagcaactcacttgtaatgagaaggcgg  
cgggtcgattccgtcaatcagcacca  
1-7tRNA-Ser(tga)c[69430,69519]  
ggaggcgtggcagagtggtttaatgcaccggtcttgaaaaccggcagtcg  
ctccggcgactcataggttcaaatcctatcgctccgcca  
1-8tRNA-Pro(tgg)c[69521,69595]  
ctccgtgtagctcagtttgtagagcgtctgcttgggagcagaatgtcg  
taggttcaaatcctgccacggagac  
1-9tRNA-Gly(tcc)c[69606,69679]  
gcggatatcgataatggtattacctcagacttccaatctgatgatga  
gttcgattctcattatccgtcca  
1-10tRNA-Leu(taa)c[69685,69771]  
gcgagaatggccaaattggtaaaggcacagcacttaaatgctgcggaat  
gatttccttggtggttcgagtcacttctgcacca  
1-11tRNA-Gln(ttg)c[69772,69845]  
tgggaattagccaagttggttaaggcactggattttgattccaggatgcaa  
agggtcgagtcctttattccagc

>KY290955.1 Aeromonas phage 65.2, complete genome

1-1tRNA-Leu(taa)[107939,108023]

gcttgtgtggtggaactggtatacacattagacttaaaatctaacgcctt  
cgggattgggggttcgaatccccccacaagcacca  
1-2tRNA-Arg(tct)[112185,112261]  
gcgctgttagctcagttggatagagcaacgttcttctaaagcgtgggtcg  
ctggttcgaatccagcacggcgcacca  
1-3tRNA-Leu(tag)[112268,112351]  
ggggatgtggtgaaattggcagacacaccagattaggttctggcgctta  
tagcgtgacggttcgagtcggtccatccccacca  
1-4tRNA-Gly(tcc)[112459,112534]  
gcgggtgtagctcagttggtagagcttctgattccaatcagaatgtcgc  
gtgttcgagtcacgttaccgcgtcca  
1-6tRNA-Met(cat)[112623,112699]  
ggccccatagctcagttggttagagcgtccgactcataatcgggtggtca  
ctggttcgagtcagttggggccacca  
1-7tRNA-Met(cat)[113158,113233]  
tgcgagttggagaagtggtcatctcgacaggctcattacctgtaggtcgg  
ttgttcgaatcaaccactcgcaacca  
1-8tRNA-Asn(gtt)[113240,113315]  
gggcgtgtagttccagcggtagaacgatggactgttaatccatgtgtcgg  
gggttcgaatccctccacgcccgccca  
1-9tRNA-Ser(tga)[113445,113538]  
ggaaggtcaacccgacggtaggcgacgggagcggcttgaaaaccgccga  
gcgttaacagcgcttgtgagttcgatcctcacatcttcgccca  
1-10tRNA-Lys(ttt)[113548,113623]  
gcatcgttagctcagcaggtagagcatgggacttttaatctcagggtcgc  
tggttcgaatccagcacgatgtacca  
1-11tRNA-Tyr(gta)[113630,113713]  
ggatgcataggcaaatggttaagccagcggctgtgaaaaccgtagccttc  
gggcttcttgggtcgaatccaagtgtatccacca  
1-12tRNA-Trp(cca)[113720,113794]  
aggtctatggtgtagtggtaacatgccgattccaaatccgtgcgtctgg  
ggttcaagtcctcatgggcctgccca  
1-13tRNA-Ala(tgc)[113800,113876]  
gggggattagctcagttggaatgagcgactggtttgaaccagtaggtca  
tcggttcgaccccataatcctccacca  
1-14tRNA-Pro(tgg)[114320,114397]  
ccgtgtgtaggctaggcaggtcaagtcgtctggttgggaccagaagatc  
gaaggttcgaatcctccacacggacca  
1-15tRNA-Thr(tgt)[114970,115045]  
gccgaattagctcatctggtagagcacagccttgaacgctgggggtggt  
ccgttcgagtcggacattcggcacca  
1-16tRNA-Ile(gat)[115058,115133]  
agtggattagctcagtaggtagagcactcgaccgataatcgagagcgc  
tggttcaacccaataatccactacca

1-17tRNA-Ser(gct)[115140,115227]  
ggagaagtggtgagcggcttaaatcgctcccctgctaaggagtaaacc  
ggaaggtttcgagagttcgaatctctccttctccgccca  
1-18tRNA-Asp(gtc)[115235,115310]  
gaggatgtagtatagtggtcaatatccctgcctgtcacgtaggagatcgc  
gggttcgagtcctcgtcacctcgcca

>KY290951.1 Aeromonas phage 31.2, complete genome

1-1tRNA-Arg(tct)c[65027,65103]  
ggtctcttagctcagctggacagagcaacgtcgttctaagtcgttggtca  
ttggttcgaatccaataggaccacca  
1-2tRNA-Met(cat)c[66072,66146]  
ggccctgtagctagacggttcaagcaggcggctcataaccgctcgtagca  
ggttcgattcctgccagggccacca  
1-3tRNA-Met(cat)c[66353,66429]  
tgcgacgtagaggagagtcgtcctcgtcgggtcatatccggaaatcg  
gtggttcgaatccatccgtcgcatcca  
1-4tRNA-Asp(gtc)c[66451,66524]  
ggagccatagtttatacggttaaaataatcccctgtcacgggatagcacc  
gagttcgatcctcgggtggctccgc  
1-5tRNA-Ser(gct)c[66598,66685]  
ggagaagtggtgagcggtttaaatcgcttccctgctaaggaaagtaaacc  
gaaaggtttcgagagttcgaatctctccttctccgccca  
1-6tRNA-Ile(gat)c[66693,66768]  
agtggattagctcagtaggtagcactcgaccgataatcgagagcgcac  
tggttcgacccagtatccactacca  
1-7tRNA-Trp(cca)c[66771,66846]  
atgacattggtgttagcggtagcatgccggtcctccaaaaccgtcggcca  
gggttcgaatccttgatgcatgccca  
1-8tRNA-Thr(tgt)c[67195,67270]  
gccgatttagctcatccgtagagcagttgtttgtaagcatcaggtggt  
ccgttcgagtcggacaatcggcacca  
1-9tRNA-Pro(tgg)c[67910,67986]  
ccgcgtgtaggctagtcaggtaggtcgtctggttgggaccagaaagtcg  
gaggttcgaatcctccacgcggacca  
1-10tRNA-Gly(tcc)c[68493,68568]  
gcgggtaaggtgttacggatacatgctagcctccaagcttgagtagac  
cggttcgataccggctacccgctcca  
1-11tRNA-His(gtg)c[68581,68655]  
gtgacggtagctcagctggtagagccccaggttgatcctggtcgtcgc  
gagttcaatcctcgtccgtcacccc  
1-12tRNA-Lys(ttt)c[68947,69022]  
gcccgcctagcttagttggtagagcatccggcttttaaccggagggtcga  
tggttcgaatccatcgcgccgcacca  
1-13tRNA-Tyr(gta)c[69080,69162]



ggaacgttcgggtaatggatatccaagcggctgtaaccgctcgcctctg  
gcattcttgggtcagtcgaagcgttcacca  
1-14tRNA-Asn(gtt)c[69658,69743]  
ggtagatgggtcagaggttagcggcgactgtaatccgcgaggaatt  
tcctctatactgggtcagtcagtcacaccgcca  
1-15tRNA-Phe(gaa)c[69825,69909]  
gttgctgtgagccagtggtgaaggcggctcttgaaacgggacgggt  
gaaagacctcgaaggtcgaatcctccagcaacc  
1-16tRNA-Ser(tga)c[69980,70073]  
ggaagcttggcagagtcggctattgcactagcttgaaaactagcgat  
cgtaggaatacgggtccatccgtcaaatcggatagcttccgcca  
1-17tRNA-Leu(taa)c[70264,70347]  
gggagtggtggaatggatatacactggagactaaaaatctcccgccttc  
gggattgagggttcgagtcctcctctctacca

>KY290948.1 *Aeromonas* phage 44RR2.8t.2, complete genome

1-1tRNA-Arg(tct)c[65379,65455]  
ggctcttagctcagctggacagagcaacgtcgttctaagtcgttggtca  
ttggtcgaatccaataggaccacca  
1-2tRNA-Met(cat)c[66424,66498]  
ggccctgtagctagacggtcaagcaggcggctcataaccgctcgtagca  
ggttcgattcctgccagggccacca  
1-3tRNA-Met(cat)c[66706,66782]  
tgcgacgtagaggagaggtcgtcctcgtcgggtcatatcccgaaatcg  
tggttcgaatccatccgtcgcacca  
1-4tRNA-Asp(gtc)c[66804,66877]  
ggagccatagttatacggttaaaataatcccctgtcacgggatagcacc  
gagttcgatcctcgggtggtccgc  
1-5tRNA-Ser(gct)c[66951,67038]  
ggagaagtggatgagcggtttaaatcgctccctgctaaggaagtaaacc  
gaaagggttcgagagttcgaatctccttctccgcca  
1-6tRNA-Ile(gat)c[67046,67121]  
agtggattagctcagtagtagcactcgaccgataatcgagagcgcac  
tggttcgacccagtatccactacca  
1-7tRNA-Trp(cca)c[67124,67199]  
atgacattggtgttagcggtagcatgccggtctccaaaaccgtgcggcca  
gggttcgaatccttgatgtcatgcca  
1-8tRNA-Thr(tgt)c[67545,67620]  
gccgatttagctcatccgtagagcagttgtttgtaagcatcaggtggt  
ccgttcgagtcggacaatcggcacca  
1-9tRNA-Pro(tgg)c[68260,68336]  
ccgctgtaggctagtcaggtaggtcgtctggttgggaccagaaagtcg  
gaggttcgaatccttcacgcggacca  
1-10tRNA-Gly(tcc)c[68842,68917]  
gcgggtaaggtgtttacggatacatgtagcctccaagcttgagtagac

cggttcgataccggctacccgctcca  
1-11tRNA-His(gtg)c[68930,69004]  
gtgacggtagctcagctggtagagccccaggttgatcctggcgtcgc  
gagttcaatcctcgtccgtcacc  
1-12tRNA-Lys(ttt)c[69125,69200]  
gcatcgtaactcaattggcagagtagcggaccttaatccgttggttct  
gagttcgaatctcagacgggtacca  
1-13tRNA-Tyr(gta)c[69804,69886]  
ggaacgttcgggtaatggtatcccaagcggctgaacccgctcgccctctg  
gcattcttggtcagagtcgaagcgtccacca  
1-14tRNA-Asn(gtt)c[69900,69985]  
ggtgatgtggctcagaggtgagcggcgactgtaatccgcgaggaatt  
tcctctatactggttcgagtcagtcaccgcca  
1-15tRNA-Phe(gaa)c[70067,70151]  
gttgctgtgagccgagtggtgaaggcgtccctggaacgggacgggt  
gaaagacctcgaaggttcgaatccttcagcaacc  
1-16tRNA-Ser(tga)c[70222,70315]  
ggaagcttggcagagctggttattgcactagcttgaactagcgt  
cgtaggaatacgtccatccgttcaaatcgatagcttcgcca  
1-17tRNA-Leu(taa)c[70506,70589]  
gggagtggtggaacggcatacacaggaggcttaaacctcccgccttc  
gggattgagggttcgagtcctcctcctacca

>KY290956.1 Aeromonas phage L9-6, complete genome

1-1tRNA-Arg(tct)c[66651,66727]  
ggtctcttagctcagctggacagagcaacgtcgttctaagtcgttggtca  
ttggtcgaatccaataggaccacca  
1-2tRNA-Met(cat)c[67696,67770]  
ggccctgtagctagacggtcaagcaggcggctcataaccgctcgtagca  
ggttcgattcctgccaggccacca  
1-3tRNA-Met(cat)c[67978,68054]  
tgcgacgtagaggagaggtcgtcctcgtcgggctcatatcccggaaatcg  
tggttcgaatccatccgtcgcacca  
1-4tRNA-Asp(gtc)c[68076,68149]  
ggagccatagttatacggttaaaataatcccctgtcacgggatagcacc  
gagttcgaatcctcgttggtccgc  
1-5tRNA-Ser(gct)c[68223,68310]  
ggagaagtggatgagcggtttaaatcgcttcctgctaaggaagtaaacc  
gaaaggttcgagagttcgaatctctccttcgcca  
1-6tRNA-Ile(gat)c[68318,68393]  
agtggattagctcagtagtagcactcgaccgataatcgagagcgcac  
tggttcgacccagtatccactacca  
1-7tRNA-Trp(cca)c[68396,68471]  
atgacattggtgttagcgttagcatgccggtctccaaaaccgtgcggcca  
gggttcgaatccttgatgtcatgcca

1-8tRNA-Thr(tgt)c[68820,68895]  
 gctggattagctcatctggaagagcagttgtttgtaagcatcaggtggt  
 ccgttcgagtcggacatccagcacca  
 1-9tRNA-Pro(tgg)c[69162,69238]  
 ccgcgtgtaggctagtcaggtaggtcgtctggttgggaccagaaagtcg  
 gaggttcgaatcctccacgcggacca  
 1-10tRNA-Gly(tcc)c[69745,69820]  
 gcgggtaaggtgttacggatacatgctagcctccaagcttgagtagac  
 cggttcgataccggctacccgctcca  
 1-11tRNA-His(gtg)c[69833,69907]  
 gtgacggtagctcagctggttagagccccaggttgatcctggtcgtcgc  
 gattcaatcctcgtccgtcacccc  
 1-12tRNA-Lys(ttt)c[70028,70103]  
 gcgccgctagcttagttggttagacatccggctttaaccggagggtcga  
 tggttcgaatccatcgccgcgcacca  
 1-13tRNA-Tyr(gta)c[70161,70243]  
 ggaacgttcgggtaatggtatcccaagcggctgaacccgctcgcctctg  
 gcattcttggttcgagtcgaaggcgttcacca  
 1-14tRNA-Asn(gtt)c[70259,70334]  
 ggttcattagctcagtggttagagcgttcgcctgttaagcgaggggtcac  
 cggttcaaatccggtatggaccgcca  
 1-15tRNA-Phe(gaa)c[70418,70502]  
 gttgctgtgagccgagtggtcgaaggcggctctggaaacgggacgggtt  
 gaaagacctcgaaggttcgaatcctccagcaacc  
 1-16tRNA-Ser(tga)c[70573,70666]  
 ggaagcttggcagagctcggcttattgcactagcttgaaaactagcat  
 cgtaggaatacggccatccgtcaaatcggatagcttccgcca  
 1-17tRNA-Leu(taa)c[70857,70940]  
 gggagtgtggtggaacggcatacacaggaggttaaacctcccgccttc  
 gggattgagggttcgagtcctcctcctctacca  
 >KY290957.1 Aeromonas phage Riv-10, complete genome  
 1-1tRNA-Arg(tct)c[66489,66565]  
 ggtctcttagctcagctggacagagcaacgtcgttctaagtcgttggtca  
 ttggttcgaatccaataggaccacca  
 1-2tRNA-Met(cat)c[67534,67608]  
 ggccctgtagctagacggttcaagcaggcggctcataaccgctcgtagca  
 ggttcgattcctgccagggccacca  
 1-3tRNA-Met(cat)c[67816,67892]  
 tgcgacgtagaggagaggtcgtcctcgtcgggctcatatcccgaaatcg  
 gtggttcgaatccatccgtcgcaccca  
 1-4tRNA-Asp(gtc)c[67914,67987]  
 ggagccatagtttatacggttaaaataatcccctgtcacgggatagcacc  
 gattcgatcctcgggtggtccgc  
 1-5tRNA-Ser(gct)c[68061,68148]

ggagaagtggatgagcggtttaaatcgcttccctgctaaggaagtaaacc  
 gaaaggttgcgaggttcgaatctctcttctccgcc  
 1-6tRNA-Ile(gat)c[68156,68231]  
 agtggattagctcagtaggtagagcactcgaccgataatcgagagcgcac  
 tggttcgacccagtatccactacca  
 1-7tRNA-Trp(cca)c[68234,68309]  
 atgacattggtgttagcggtagcatgccggtctccaaaccgtgcggcca  
 gggttcgaatccttgatgtcatgcc  
 1-8tRNA-Thr(tgt)c[68655,68730]  
 gccgatttagctcatccgtagagcagttgtttgtaagcatcaggtggt  
 ccgttcgagtcggacaatcggcacca  
 1-9tRNA-Pro(tgg)c[69370,69446]  
 ccgcgtgtaggctagtcaggtaggtcgtctggttgggaccagaaagtcg  
 gaggttcgaatcctccacgcggacca  
 1-10tRNA-Gly(tcc)c[69952,70027]  
 gcgggtaagggtgttacggatacatgctagcctccaagcttgagtagac  
 cggttcgataccggctacccgctcca  
 1-11tRNA-His(gtg)c[70040,70114]  
 gtgacggtagctcagctggtagagccccaggttgatcctggtcgtcgc  
 gattcaatcctcgtccgtcacccc  
 1-12tRNA-Lys(ttt)c[70235,70310]  
 gcatcgtaactcaattggcagagtagcggaccttaatccgttggtct  
 gattcgaatctcagacggtgtacca  
 1-13tRNA-Tyr(gta)c[70914,70996]  
 ggaacgttcgggtaatggtatccaagcggctgtaaccgctcgcctctg  
 gcattcttggttcgagccaaggcgtccacca  
 1-14tRNA-Asn(gtt)c[71010,71095]  
 ggtgatgtggctcagaggttagcggcgactgttaatccgcgaggaatt  
 tcctctatactggttcgagtcagtcacaccgcca  
 1-15tRNA-Phe(gaa)c[71177,71261]  
 gttgctgtgagccgagtggtgaaggcggctccctggaaacgggacgggtt  
 gaaagacctcgaaggttcgaatcctccagcaacc  
 1-16tRNA-Ser(tga)c[71332,71425]  
 ggaagcttggcagagtcgtggttattgcactagtctgaaaactagcgat  
 ctaggaatacgggtccatccgttcaaatcggatagcttccgcca  
 1-17tRNA-Leu(taa)c[71616,71699]  
 gggagtgtggtggaacggcatacacaggaggcttaaacctcccgccttc  
 gggattgagggttcgagtcctcctctctacca

>KY290958.1 *Aeromonas* phage SW69-9, complete genome

1-1tRNA-Arg(tct)c[66154,66230]  
 ggtctcttagctcagctggacagagcaacgtcgttctaagtcgttggtca  
 ttggttcgaatccaataggaccacca  
 1-2tRNA-Met(cat)c[67199,67273]  
 ggcctgtagctagacggttcaagcaggcggctcataaccgctcgtagca

ggttcgattcctgccagggccacca  
1-3tRNA-Met(cat)c[67481,67557]  
tgcgacgtagaggaggtcgtcctcgtcgggtcatatcccggaaatcg  
gtggttcgaatccatccgtcgcaccca  
1-4tRNA-Asp(gtc)c[67579,67652]  
ggagccatagttatcagggttaaaataatcccctgtcacgggatagcacc  
gagttcgatcctcggtaggtccgc  
1-5tRNA-Ser(gct)c[67726,67813]  
ggagaagtggatgagcgggttaaatcgcttccctgctaaggaagtaaacc  
gaaaggttcgagagttcgaatctctcttcccgcca  
1-6tRNA-Ile(gat)c[67821,67896]  
agtggattagctcagtagtagcactcgaccgataatcgagagcgac  
tggttcgacccagtatccactacca  
1-7tRNA-Trp(cca)c[67899,67974]  
atgacattggtgttagcggtagcatgccgtctccaaaaccgtgcggcca  
gggttcgaatccttgatgtcatgcca  
1-8tRNA-Thr(tgt)c[68320,68395]  
gccgatttagctcatccgtagagcagttgtttgtaagcatcaggtgtt  
ccgttcgagtcggacaatcggcacca  
1-9tRNA-Pro(tgg)c[69037,69111]  
ctcgggttaggcaagtggatgtcgttccgttgggacggaatttcgag  
tgttcgattcactccaccgagacca  
1-10tRNA-Gly(tcc)c[69300,69375]  
gcgggtaaggtgttatggatacatgctagcctccaagcttgagtagac  
cgggttcgataccggctacccgctcca  
1-11tRNA-His(gtg)c[69388,69462]  
gtgacggtagctcagctggttagagccccaggctgtgatcctggtcgtcg  
gagttcaatcctcgtccgtcacccc  
1-12tRNA-Lys(ttt)c[69583,69658]  
ccgttgctagcttagctggttagagcatccggctttaaccggagggtcga  
tggttcgaatccatcgcgccgaccca  
1-13tRNA-Tyr(gta)c[69706,69788]  
ggaacgttcgggtaatggatcccaagcggctgaacccgctcgcccttg  
gcattcttggttcgagtcgaagcgttcacca  
1-14tRNA-Asn(gtt)c[69804,69879]  
ggttcattagctcagtggttagagcgttcgcctgttaagcgaggggtcac  
cggttcaaatccggtatggaccgcca  
1-15tRNA-Phe(gaa)c[69963,70047]  
gttgctgtgagccgagtggtgaaggcgtctctggaaacgggacgggtt  
gaaagacctcgaagggtcgaatccttcagcaacc  
1-16tRNA-Ser(tga)c[70118,70211]  
ggaagcttggcagagcttggttattgcactagtcttgaactagcgat  
cgtaggaatacgggtccatccgttcaatcggatagcttccgcca  
1-17tRNA-Leu(taa)c[70402,70485]

gggagtgtggtggaatggtatacacaggaggcttaaacctccgccttc  
 gggattgagggttcgagtcctcctctctacca  
 >KY368639.1 Bacillus phage vB\_BsuM-Goe2, complete genome  
 1-tRNA-Asn(gtt)[28541,28615]  
 tcctctatagctcaatggtagagcacatgactgttaatcatggggttgta  
 ggttcgaatcctactggaggagcca  
 1-2tRNA-Ser(gct)[28703,28792]  
 tggaatgttaccgaagcggttaaggggtctggtgctaaccagatagcgg  
 gcttgatgtccggcataggttcgaatcctataattccgt  
 1-3tRNA-Arg(cct)[32867,32941]  
 tgcccatgtagctcagggatagagcacgtccctcctaaggacggtgtcg  
 ggagttcaattctctccatgggcgt  
 >KY368640.1 Bacillus phage vB\_BsuM-Goe3, complete genome  
 1-tRNA-Asn(gtt)[30657,30730]  
 ttgtcccatagctcaatggtagagcgtccggctgtaaccgggaggttgc  
 tgggtcgaaccagctgggacagt  
 1-2tRNA-Met(cat)[32239,32308]  
 tgcaggagaattggtattccatccggtctcataagccgactccgaggg  
 ttcgactccctcctctgcaa  
 1-3tRNA-Arg(tct)[32712,32786]  
 tgccctctgtggtgaaataggatatcacagcagacttctattctgctattc  
 taggttcgactcctagcaggggcgt  
 1-4tRNA-Asp(gtc)[32787,32860]  
 ttgctctatagtgtagcgggtcaacacgccagcctgtcacgctggtatccc  
 ggggtcgaatcccggtagagtcgt  
 1-5tRNA-Tyr(gta)[33266,33349]  
 ggggtgagcggtaacgtaggagagttacgatggactgtaaatccattcctt  
 tcgaggttagagtgttcgaatcactccttaccca  
 >KY581279.1 Staphylococcus phage pSa-3, complete genome  
 1-tRNA-Met(cat)c[11602,11673]  
 ggactcttagcttaaaggtaaagccaaccgctcataacggtttgactgta  
 ggttcgaatcctgcagagtcca  
 1-2tRNA-Trp(cca)c[34820,34891]  
 acacccttagtataattagtagtacaagggtctccaaacccttagtctt  
 tgtgcaaatcaaagagggtgtg  
 1-3tRNA-Phe(gaa)c[34898,34970]  
 ggtttcttagctcagatggtagagcactagattgaagctctaggtgtcat  
 tgggtcaaatccaatagaacca  
 1-4tRNA-Asp(gtc)c[34976,35051]  
 ttggtcattggtgtaactggtaacacactgccctgtcacggcagagagt  
 acgagttcgagtcctctatgggtcgt  
 >KY630187.1 Serratia phage BF, complete genome  
 1-tRNA-Ser(gct)[269274,269366]  
 ggtagattgggtgagtggtttaaccagcttctgctaagaagtcggtcg

ctcaaaaggcgcccggtgggttcaaattccacatctacctcca  
1-2tRNA-Trp(cca)[273739,273810]  
aggagattggccgattggtcaggcagcgattccaaatccgtctaggtgg  
gttcaattcctacatctcctgc  
1-3tRNA-Thr(tgt)[276483,276555]  
ggttgggtcatataaaggctattatggcggtttgaatccgttcatcag  
ggttcgagtcctgactaaccac  
1-4tRNA-Leu(tag)[281227,281308]  
ggggatatggtggaattggtagacacgtggtcttagaagccaccgcctt  
gtcgtgggagttcgagtcctccatccccac  
1-5tRNA-Arg(tct)[288101,288173]  
ctcctgttagctcaatggatagagcagtagccttctaagctatagatata  
ggttcgattcctatacgggagac  
1-6tRNA-Pyl(cta)[289666,289741]  
gcctttgtagctcagttggtagagcgggaatctctaaaattctttgtcgt  
cggttcgagtcgaccatcggcacca  
1-7tRNA-Met(cat)[290082,290156]  
ggccctttagctcagtggtagagcaggcgactcataatcgcttggtcgtt  
ggatcgttcccaacaaggccacca  
1-8tRNA-Leu(taa)[291529,291617]  
gcgggtgtggcggtattggcagtcacgacaggactaaaatcctgtaggg  
gtttccccttgtgagttcgaatctcatcaccgtacca  
1-9tRNA-Leu(caa)[298104,298189]  
ggggatatggcgaaattgtaagacgcaccacactcaaaatgtggcggtt  
taatccgtgtcggttcgactccgactatccccacca  
1-10tRNA-Glu(ttc)[301155,301229]  
gttctgttagacaaattggtaaagtcaccacccttcaaggtggggttta  
cgggttcgacccccgtacagaacgc  
1-11tRNA-Ser(tga)[301575,301667]  
ggtaggttggcagagtttggtctattgcacttgtcttgaacaagcggg  
ggttaacagccctccgagggttcaaattccctcacctacctcca  
1-12tRNA-Ser(gga)[302319,302411]  
ggtaaagtggcagagcggctgaatgcaaccgcttggaagcggtcaggtt  
aggtaatccctagcctcgtaggttcaaatcctatctttaccgc  
1-13tRNA-Ile(gat)[304238,304311]  
gggaatataattcagttggtagaatgctcgaccgataatcgagtcgccgc  
tggttcgagtcagctattccac  
1-14tRNA-Asn(gtt)[306231,306303]  
ggttatgtcgataaaggttattacggagagctgtaactctttatctt  
ggttcgattccaagcatgaccgc  
1-15tRNA-Gln(ttg)[306480,306553]  
aggagtatggtgtaattggttagcacacgtgactttgactcacgtagttg  
aggttcgagtccttatattcctgc  
1-16tRNA-Gly(tcc)[306704,306786]

gcgggattagctcagtggttagagcacttgcctccaagcaagaggcgaat  
aggttccatcggttcgaatccgatattccgctc  
1-17tRNA-Asp(gtc)[308007,308079]  
ggagctatcgtatatacggtagtatactcccctgtcacgggagagaggcg  
ggttcgattcccgtagttccgc  
1-18tRNA-Arg(acg)[308761,308835]  
gttctcgtagctcattcgatagagcgtcacgctacgaacgtgaaggtag  
taggttcgatccctccgagaacgc  
1-19tRNA-Pro(tgg)[310225,310301]  
cggggtgtagctcagttgattagagtgcataatttggggatatgaagccg  
ctggtttgagtcagccatcccaccca  
1-20tRNA-Pro(tgg)[310311,310383]  
ctccgattgggtcattggtgatcgcatagttgggactatgattaaggg  
tgttcgattcactcattggagac  
1-21tRNA-His(gtg)[312101,312177]  
gtggctataagcatagttggtaattgtcctgtgacgcagatgacg  
tgggttcgactcccactagccacacca  
1-22tRNA-Phe(gaa)[312444,312521]  
gggtctgtagctcagtaggttagagcgttggttgaaacaccaaaggctc  
gagggttcgattccctctggaccaccca  
1-23tRNA-Lys(ttt)[313219,313305]  
gggtcgttcactcagttggttagagtaccggacttttaatccggcgggta  
tatcccatcgaaggttcgaatccttcacggcctacca  
1-24tRNA-Tyr(gta)[315603,315687]  
ggcatcgtcgcatagcggcaattgcaggagactgtaaatctctgccttc  
gggcttcgttggttcgagtcgaaccgggtgccacca  
1-25tRNA-Cys(gca)[317506,317583]  
gcaacgggtgcctgagatggcttaaaggagcggattgcaaaccgatgttc  
gggggttcgaatccctcccgttgctcca  
1-26tRNA-Lys(ctt)[317955,318031]  
gggctgttaactcagtaggttagagtaccgactcttaatcggtttgtcc  
agggttcgaatccctgacagcccacca  
1-27tRNA-Met(cat)[318316,318389]  
ggtcagttagttcagttggtagaacgctcactcataatgaagaagtcac  
tggatcgtagccagtagtaccac  
1-28tRNA-Met(cat)[319253,319328]  
tcgggagtagagcagtggttagcttgcaaggctcataaccttgaggtcgtg  
tttggttcgaatccaccccgcatc  
1-29tRNA-Ala(tgc)[319346,319419]  
ggggatatagctcagttgggagagcatctgccttcacgtagaagggtcat  
cgggttcgaccccgattatctccac

>KY593455.1 Yersinia phage fHe-Yen9-01, complete genome

1-1tRNA-Gly(tcc)c[75566,75641]  
gcagagttcgtatagtggttaatactattgactccacccagtaaacat



cggttcgaatccgatactctgtcca  
1-2tRNA-Trp(cca)c[75892,75966]  
aggtctttagtatagtggtcgttgggtccaaacctagtgacggg  
tggtcgattcacccaaggcctcca  
1-3tRNA-Arg(tct)c[77249,77325]  
gtcctcatagctcaacaggacagagcaacggtcttctaaacctaggttg  
ctggttcgattccagctggggacacca  
1-4tRNA-Met(cat)c[77562,77638]  
ggccctttagctcagaagtagtagcgagcgactcataatcgtaggtca  
ctggttcgaatccagtaagggtcacca

>KY608967.1 UNVERIFIED: Escherichia phage CF2, complete genome

1-1tRNA-Gln(ttg)[87968,88041]  
tgggaattagccaagttgtaaggcactggattttgattccaggatgcaa  
aggttcgagtcctttattcccagc  
1-2tRNA-Leu(taa)[88042,88128]  
gcgagaatggccaaattggtaaaggcacagcacttaaaatgctcggaat  
gatttccttggtggttcgagtccttctcgcacca  
1-3tRNA-Gly(tcc)[88134,88207]  
gcggatatcgataatggtattacctcagactccaatctgatgatgtga  
gttcgattctcattatccgtcca  
1-4tRNA-Pro(tgg)[88218,88292]  
ctccgtgtagctcagtttgtagagcgtctgcttgggagcagaatgtcg  
taggttcaaactcctgccacggagac  
1-5tRNA-Ser(tga)[88294,88383]  
ggaggcgtggcagagtgtttaatgcaccggtctgaaaaccggcagtcg  
ctccggcgactcataggtcaaactcctatcgctccgcca  
1-6tRNA-Thr(tgt)[88389,88464]  
gctgatttagctcagtaggtagagcaactcactgtaatgagaaggtcgg  
cggttcgattccgtcaatcagcacca  
1-7tRNA-Met(cat)[88466,88540]  
ggccctgtagctggaaggttcaagcaagcgactcataatcgccagatggt  
ggttcaattccaccagggccacca  
1-8tRNA-Tyr(gta)[88550,88636]  
ggggagtatcccgtagaggtagcgtgtggactgtaaattcattgtcat  
tgcgactcgggtggttcgactccaccactccccacca  
1-9tRNA-Asn(gtt)[88641,88715]  
ggatgtgtagctcaatggcagagcgatcgctgttaagcgattggtata  
ggttcgaatcctatcacgtccgcca  
1-10tRNA-His(gtg)[88830,88905]  
gtggccgtagttcagttggtagaactcgagattgtgattctcgtagtc  
gggttcgactcccatcggtcaccacca  
1-11tRNA-Arg(tct)[88910,88985]  
cggggcatagctcagaaggaagagcaaggaccttctaagtcctaggtcgt  
aggttcgatccctactgcctcgacca

>KY608965.1 UNVERIFIED: Escherichia phage HP3, complete genome

1-1tRNA-Arg(tct)[84135,84211]  
cgaggcataactcaattgtatagagcaacggacttctaataccgtagggtg  
aaggtagaatccttctgtctcgacca  
1-2tRNA-Met(cat)[84218,84291]  
ggccctgtagctcaatggtagcagcagtcgccctcataagggaaaggta  
ccagttcgaatctggctgggtca

>KY626162.1 Salmonella phage Si3, complete genome

1-1tRNA-Pro(tgg)[2154,2230]  
ctctgttagctcagcttgtagagcgttcggttggggcggttaaggccg  
gaggttcaagtctccaacagagacca  
1-2tRNA-Glu(ttc)[2238,2315]  
gttcagtagacaaaatggtagtcaccactcttcaaagtgatatt  
gagggttcaaatcccttctggaacgcca  
1-3tRNA-Met(cat)[2407,2483]  
tgcgggtatagagaaaggcgctctcacatgtctcattagcatgggtatcgg  
caggttcgactcctgcacccgcctcca  
1-4tRNA-Asn(gtt)[2567,2643]  
ggttaggaagcacataaggtatgtcgggtcgcctgttaagcgaatggcac  
agggttcgaatccctgactaaccgcca  
1-5tRNA-Tyr(gta)[2713,2800]  
gtgtcggtatcccgtagatggtagcgggtgggactgtaaatccctgtca  
ttgagactcggtagggttcgactcctacacggcacacca  
1-6tRNA-Asp(gtc)[2806,2882]  
ggttatgtagttaatttggtaaaatactccctgtcacgggagatgatg  
agggttcaaatcccttcgtaaccgcca  
1-7tRNA-Lys(ttt)[3311,3386]  
ggaagtgtagcagaatggtagtcggcagacttttaactctgacaggcgat  
gggttcgaatccctccactctacca  
1-8tRNA-Met(cat)[3391,3467]  
ggttcagtcgcagataaggtaatgcaagggtctcataagccctatgaatg  
tgggttcgattcccatctgaacctcca  
1-9tRNA-Ile(gat)[3470,3544]  
tgtgggttagcataaatggtaatgcaaacggctgataaccgtagaagag  
ggttcgataccctcacctacaacca  
1-10tRNA-Ser(tga)[4201,4290]  
ggtaggtagcggctaattgtagccaaactgtcttgaaaacagttgccact  
gtagagatacggtaggggttcgactccttactaccgcc  
1-11tRNA-Leu(tag)[4546,4623]  
gggagattgacggtaattggtaaacctacctcgcttagaacgaggtgttt  
gagggttcgaatccctgtctcctacca  
1-12tRNA-Lys(ctt)[4631,4706]  
gcaggtgtagcaaatggttatgcggctgactcttaacagtaagacgat  
gggttcaatccctccactgtacca

1-13tRNA-Ala(tgc)[4713,4788]  
 ggggatgtagttacatgggtaaaacataagtttgcaaacttggaact  
 gattcaattctcagtactccacca  
 1-14tRNA-Gly(tcc)[4795,4869]  
 gcatccatagtttaaacgggaaaattacagtcttccaaactgaggttgag  
 ggttcgattccctctggatgctcca  
 1-15tRNA-Thr(tgt)[4876,4952]  
 gctgcttcgtataattggctattacacatcccttgaaggatggaaatg  
 cagggtcgagtcctgtgagcagcacca  
 1-16tRNA-Val(tac)[5048,5122]  
 actcgcttagtttataggtaaaacatcaccttacaagatgaagaaaaa  
 ggttcaagtccttagtgagtacca  
 1-17tRNA-Leu(taa)[5124,5202]  
 gtccagtatcccaattggcagagaggccagacttaaatctgtgttatg  
 tatcggttcgaatccgatatggagtacca  
 1-18tRNA-Gln(ctg)[5208,5283]  
 agcggatagcataactggcaatgcagcagtcctgaagctgcctatta  
 aggttcaaatccttatgccgctgccca  
 1-19tRNA-His(gtg)[5315,5390]  
 gtggccttatcataaacgtaatgacccatgctgtgaacatggtctatac  
 ggggtcaaatcccgtaggtcacccca  
 1-20tRNA-Phe(gaa)[5397,5472]  
 agtccaagtagcttatatggttaaagcgcgtgtctgaaaaacatgagaag  
 aggggtcaaatcccactggactacca  
 1-21tRNA-Ser(gct)[6226,6318]  
 ggaagattaaccctaaaaggtaaggagcagtttgctaaactgccagtag  
 ctgagaaatcggtgtaccagttcaagtcggtatcttctcca  
 1-22tRNA-Cys(gca)[6323,6398]  
 gaatccgtgacagaaatggatatgtgcctgtctgcaaaacaggtttataa  
 ggggtcaagtccttcggattctcca  
 >KP143762.1 Salmonella phage Mushroom, complete genome  
 1-1tRNA-Cys(gca)c[60589,60664]  
 gaatccgtgacagaaatggatatgtgcctgtctgcaaaacaggtttataa  
 ggggtcaagtccttcggattctcca  
 1-2tRNA-Ser(gct)c[60669,60761]  
 ggaagattaaccctaaaaggtaaggagcagtttgctaaactgccagtag  
 ctgagaaatcggtgtaccagttcaagtcggtatcttctcca  
 1-3tRNA-Phe(gaa)c[61514,61589]  
 agtccaagtagcttatatggttaaagcgcgtgtctgaaaaacatgagaag  
 aggggtcaaatcccactggactacca  
 1-4tRNA-His(gtg)c[61596,61671]  
 gtggccttatcataaacgtaatgacccatgctgtgaacatggtctatac  
 ggggtcaaatcccgtaggtcacccca  
 1-5tRNA-Gln(ctg)c[61703,61778]

agcggtagcataactggcaatgcagcagctctgaagctgtcctatta  
aggttcaaactccttatgccgtgccca  
1-6tRNA-Leu(taa)c[61784,61862]  
gtccattactccaattggcagagaggccagactaaaatctgtgttatg  
tatcggttcgaatccgatatggagtacca  
1-7tRNA-Gln(ttg)c[61865,61940]  
aggggattagtttacaagggtaaaacctcggctttgaaatcgaagaagt  
tggttcaattccaacatcccccgcca  
1-8tRNA-Leu(caa)c[62525,62602]  
gttcagtatcccaattggcagaggatgcaagctcaaacctgtattagt  
gacggttcgaatccgtcttggaaacacca  
1-9tRNA-Val(tac)c[62604,62678]  
actcgcttagtttataggtaaaacatcaccttacaagatgaagaaaa  
ggttcaagtccttagtgagtacca  
1-10tRNA-Thr(tgt)c[62774,62850]  
gctgcttcgtataattggctattacacatcccttgaaggatggaaatg  
caggttcgagtcctgtgagcagcacca  
1-11tRNA-Gly(tcc)c[62857,62931]  
gcatccatagtttaaacgggaaaattacagtccttcaaactgaggttgag  
ggttcgattccctctggatgctcca  
1-12tRNA-Ala(tgc)c[62938,63013]  
tgggtcatagtttatagggtaaaatcgagtttgcaaacttggaact  
gagttcaattctcagtgactccacca  
1-13tRNA-Lys(ctt)c[63020,63095]  
gcaggtgtagcaaaatggttatgcggctgactcttaacagtaagacgat  
gggttcaattccctccacctgtacca  
1-14tRNA-Leu(tag)c[63103,63180]  
gggagattgacggtaattggtaaacctaccatccttagaagttggtgtt  
gagggttcgaatcccttgtctctacca  
1-15tRNA-Ser(tga)c[63436,63525]  
ggtaggtagcggctaattggtagccaaactgtcttgaaaacagttgccact  
gtagagatacggtaggggttcgactccttacttaccgcc  
1-16tRNA-Ile(gat)c[64183,64257]  
tgtgggtagcataaatggtaatgcaaacggctgataaccgtagaagag  
ggttcgataccctcacctacaacca  
1-17tRNA-Met(cat)c[64260,64336]  
ggttcagtcgcagataaggtaatgcaagggtctcataagccctatgaatg  
tgggttcgattcccatctgaacctcca  
1-18tRNA-Lys(ttt)c[64341,64416]  
ggaagtgtagcagaatgggtgatcggcagacttttaactgacaggcgat  
gggttcgaatccctccacttctacca  
1-19tRNA-Asp(gtc)c[64845,64922]  
ggttatgtagttaatttgggtaaaatactcccctgtcacgggagatgat  
gagggttcaaatcccttcgtaaccgcca

1-20tRNA-Tyr(gta)c[64928,65015]  
gtgtcggtatcccgtagatggtagcgggtgggactgtaaatccctgtca  
ttgagactcggtagggtcgactcctacacggcacacca  
1-21tRNA-Asn(gtt)c[65085,65161]  
ggtaggaagcacataaggtatgtcggtcgcctgttaagcaatggcac  
agggttcgaatccctgactaaccgcca  
1-22tRNA-Met(cat)c[65245,65321]  
tgcgggtatagagaaaggcgtctcacatgtctcattagcatggatcgg  
cagggtcgactcctgcacccgcctcca  
1-23tRNA-Glu(ttc)c[65413,65490]  
gttcagtagacaaaatggtagtcaccactcttcaaagtggatatt  
gagggttcaaacccttctggaacgcca  
1-24tRNA-Pro(tgg)c[65498,65574]  
ctctgttagctcagcttgtagagcgtccgttggggcggttaaggccg  
gaggttcaagtctccaacagagacca

>KY654690.2 *Citrobacter* phage Mijalis, complete genome

1-1tRNA-Cys(gca)c[60325,60400]  
gtatcggtgacagaaatggatatgtgcctgtctgcaaaacaggttatga  
gggttcaagtccttccgatactcca  
1-2tRNA-Ser(gct)c[60408,60500]  
ggaagattaaccataaaaggaaggagcagtttgctaaactgccagtaa  
ccgagaaatcgcgtagcagttcaagctcgtatcttctcca  
1-3tRNA-Phe(gaa)c[61252,61327]  
agctcaattagcttatatggttaaagcgcgtgtctgaaaaacatgagaac  
agggttcaaaccgatgggctacca  
1-4tRNA-His(gtg)c[61335,61411]  
gtggccttatcataaatggataatgacctatgctgaacatggtctata  
cgggttcgattcccgtaggtcacccca  
1-5tRNA-Gln(ctg)c[61443,61518]  
agcagtgtagcataactggcaatgcaccagccttgaagctgaatgatta  
agggttcaaatccttacgctgctgcca  
1-6tRNA-Leu(taa)c[61525,61603]  
gtccattactccaattggcagagagaccagactaaaatctgcgttatg  
tatcggttcgaatccgatatggagtacca  
1-7tRNA-Gln(ttg)c[61606,61681]  
aggggattagtttacacggttaaacctcggctttgaaatcgaagaaga  
tggttcaattccatcatccccgcca  
1-8tRNA-Arg(acg)c[61689,61765]  
gcagaattagttcaaattggacagagcagcagcctacgaagttgttagtta  
gaggttcgaatcctctattctgcacca  
1-9tRNA-Leu(caa)c[61944,62021]  
gttcagtatcccaattggcagaggatgaagctcaaacctgtattagt  
gacggttcgaatccgtcttgaacacca  
1-10tRNA-Val(tac)c[62023,62097]

gctcgcttagtttatatggtaaagcccatccttacaagttggtgaagaa  
ggttcaagtccttcagcgagtacca  
1-11tRNA-Thr(tgt)c[62192,62267]  
gctcctatcgataactggctattacggttgccttgaagcaacttatca  
gggttcgaatccttgtgggagcacca  
1-12tRNA-Gly(tcc)c[62274,62348]  
gcatccatagtttaaacgggaaaattacagtcttccaaactgaggttgag  
ggttcgattccctctggatgtcca  
1-13tRNA-Ala(tgc)c[62355,62430]  
ggggatgtagtttacatgggtaaaacataagtttgcaaacttaagtaca  
gggttcaattccctgcttctccacca  
1-14tRNA-Lys(ctt)c[62437,62512]  
gcaggtgtagcaaaatgggtatgcggctgactcttaatcagtaagacgat  
gggttcaattccctccacctgtacca  
1-15tRNA-Leu(tag)c[62520,62596]  
gcacctatagcccaattggaagaggcagcagacttagaatctgctcagtg  
tgagttcgagtctcttaggtgtacca  
1-16tRNA-Ser(tga)c[62848,62937]  
ggtagtagcggctaataggaagccaaactgtcttgaacacagttgccatt  
gtagagatacggtaggggttcgactccttatctaccgcc  
1-17tRNA-Arg(tct)c[63328,63404]  
gcacccttagttcaaacggatagagcaacggcttctaaaccgtcagtta  
caggttcgaatcctgtagggtgtgcca  
1-19tRNA-Ile(gat)c[63682,63757]  
gctggtatagttaagacgggtataacactcccctgataagggaacatcgg  
tggttcgattccacctaccagtacca  
1-20tRNA-Met(cat)c[63760,63836]  
ggttcagtcgcagataaggtaatgcaagggttcataagccctatgaatg  
tgggttcgattccacctgaacctcca  
1-21tRNA-Lys(ttt)c[63843,63918]  
ggaagtgtagcagaatgggtgatgcggcagactttaatctgacaggcgaat  
gggttcgaatccctccacttctacca  
1-22tRNA-Asp(gtc)c[64345,64421]  
ggttatgtagttaactggataaaatacctccctgtcacggaggatgatg  
agggttcgattcccttcgtaaccgcca  
1-23tRNA-Asn(gtt)c[64527,64602]  
ggtaagttagctaacttggtaaagcgctgactgtaatcagcgatatca  
gggttcaaatccctgacttaccgcca  
1-24tRNA-Met(cat)c[64687,64763]  
tcggggtatagagaaaggcgctctcacatgtctcattagcatgggtatcgg  
taggttcgactcctacacccgcctcca  
1-25tRNA-Glu(ttc)c[64850,64927]  
attcccgtagacaaattaggtaaagtcaacacccttcaaggtgtggtt  
gagggttcaagtccttcgggaatgcca

1-26tRNA-Pro(tgg)c[64934,65010]  
ctccatttagctcagcttggttagagcgttcggttggggcggtaaggccg  
aaggttcaagtccttcaatggagacca

>KY779849.1 Staphylococcus phage qdsa002, complete genome

1-1tRNA-Met(cat)c[19488,19559]  
ggactcttagcttaaaggtaaagccaaccgctcataacgggttgactgta  
ggttcgaatcctgcagagtcca  
1-2tRNA-Trp(cca)c[41139,41210]  
acacccttagtataattagtagtacaagggtctccaaacccttagtctt  
tgtgcaaatcaaagagggtgtg  
1-3tRNA-Phe(gaa)c[41217,41289]  
ggtttcttagctcagatggttagagcactagattgaagctctaggtgtcat  
tggttcaaatccaatagaaacca  
1-4tRNA-Asp(gtc)c[41295,41370]  
tggctcattggtgtaactggttaacacactgccctgtcacggcagagagt  
acgagttcgagctcgtatgagtcgt

>KY703222.1 Escherichia phage phiC120, complete genome

1-1tRNA-Arg(tct)c[164441,164517]  
cgaggcatagctcaattgtatagagcaacggacttctaaccgtaggttg  
aaggttagaatccttctgtctcgcca  
1-2tRNA-Met(cat)c[164524,164597]  
ggccctgtagctcaacggttagcagcagtcacctcataagggaaggta  
ccagttcgaatctggtctgggtca

>KR052480.1 Sinorhizobium phage phiM7, complete genome

1-1tRNA-Thr(tgt)c[78511,78594]  
gccggtatagccaagcggtcgaaggcacctgatttgaatcaggtattca  
aacgtcggcagttcgaatctgtctaccggctcca  
1-2tRNA-Gln(ttg)c[78595,78668]  
ttgcccttagttcagttggtagaacgtcgaatttggtttgaagggtccg  
tggttcgaatccacgagggttaagc  
1-3tRNA-His(gtg)[83541,83617]  
tcatggatggtgttagtctggttagcacgcggatgtggaccgcaagca  
taggttcaaatcctattccatggacca  
1-4tRNA-Leu(caa)[92539,92626]  
tgggagataaaggaaacttaccagttcaattctggtttctccaagagtaa  
tcgagtggtttaggttcgagtcctacctcccagcca  
1-5tRNA-Met(cat)[93177,93253]  
tgcgggtagtagcagtggttagctcgtctgcctcataagcagaaggta  
tcagttcgaatctgatccccgaacca  
1-6tRNA-Cys(gca)[93940,94014]  
gacgagaaggcagaagggttatgcgcggcgttgcaaccgccgtatgtgtc  
ggttcaagtcgggtctcgtctcca  
1-7tRNA-Lys(ttt)[98572,98648]  
gcgcgcttaactcagttggttagagtggcgacctttaagtcgttgtcc

ccggttcgagtcgggagcgcgacca

>KY683736.1 Escherichia phage V18, complete genome  
 1-tRNA-Met(cat)c[56620,56694]  
 tgcctctagctggaaggttcaagcaagcgactcataatcgccagacggt  
 ggttcaattccaccaggccacca  
 1-2tRNA-Thr(tgt)c[56695,56770]  
 gctgatgtagcacaattgtagtgcaattgattgtaatcaataggttgc  
 aggttcgagtcctgctatcagcacca  
 1-3tRNA-Arg(tct)c[56868,56942]  
 gccctgtagcttagtgataaagcagcgccctctaagccgttgacact  
 ggttcgagtcagtcagggtgcca

>KY794641.1 Staphylococcus phage vB\_Sau\_CG, complete genome  
 1-tRNA-Met(cat)c[117543,117614]  
 ggactcttagcttaaaggtaaagccaaccgctcataacggttgactgta  
 ggttcgaatcctgcagagtcca  
 1-2tRNA-Trp(cca)c[138456,138527]  
 acacccttagtataattagtagtacaagggtctccaaacccttagtctt  
 tgtgcaaatcaaagagggtgtg  
 1-3tRNA-Phe(gaa)c[138534,138606]  
 ggtttcttagctcagatggtagagcactagattgaagctctaggtgtcat  
 tggttcaatccaatagaaatca  
 1-4tRNA-Asp(gtc)c[138612,138687]  
 tggctcattggtgtaactggtaacacactgccctgtcacggcagagagt  
 acgagttcgagtcctgtatgagtcgt

>KY794642.1 Staphylococcus phage vB\_Sau\_Clo6, complete genome  
 1-tRNA-Asp(gtc)c[139472,139547]  
 tggctcattggtgtaactggtaacacactgccctgtcacggcagagagt  
 acgagttcgagtcctgtatgagtcgt

>KY794643.1 Staphylococcus phage vB\_Sau\_S24, complete genome  
 1-tRNA-Asp(gtc)c[135731,135806]  
 tggctcattggtgtaactggtaacacactgccctgtcacggcagagagt  
 acgagttcgagtcctgtatgagtcgt

>KY994101.1 Pseudomonas phage vB\_PaeM\_G1, complete genome  
 1-tRNA-Asn(gtt)[23850,23926]  
 tccgttcgggtccctcaaggtgaggagcttgactgttaatcaagacgtgc  
 ctggttcgattccaggagcggagcca  
 1-2tRNA-Tyr(gta)[23984,24071]  
 ggaggggtggcagagcggtttaatgcaccgactgtaaatccggcgtccg  
 actgggcacgcgtggttcaatccagccccctccacca  
 1-3tRNA-Gln(ttg)[24273,24349]  
 aggcggtgtggcgaaggtttaacgcactggactttgactccagcatttg  
 tgggttcgaatcccaccagtcgtgcca

>KY945241.1 Synechococcus phage S-H35, complete genome  
 1-tRNA-Asn(gtt)c[37966,38040]



ttctctatagctcagtcggtagagcgagtactgtaatcactatgtcc  
 ctggttcgagcccaggtggaggagt  
 1-2tRNA-Ala(tgc)c[38065,38137]  
 ggggaattagctcagttggtagacacctgctttgcacgcaggggggtcag  
 cggttcgagtcgctattctcca  
 1-3tRNA-Thr(tgt)c[38140,38215]  
 gccactatagctcagctggatagagcaacggtttgtaaaccgtaggtcg  
 tcggttcaagtcgacttgggtcc  
 1-4tRNA-Leu(taa)c[39538,39620]  
 gggcaggtggcggaatggtagacgcaccagacttaaaatctgttgactgt  
 atagtcgtgaggggtcaagtcctctctgccta  
 1-5tRNA-Pro(tgg)c[40174,40248]  
 cggggtgtagcgcagtttggtagcgcactctgcttgggagcagagggtcg  
 caggttcgaatcctgtcaccgccgac  
 1-6tRNA-Val(tac)c[43880,43951]  
 gggcgattaactcagcggtagagtgccctcttacaagtgtaagtcact  
 ggttcgaatccagtatcgcca  
 1-7tRNA-Leu(tag)c[70872,70953]  
 gcacatgtggcggaattggtagacgcgctgggttaggtccagtagagc  
 aatctgtggaggttcaagtcctctcatgtga  
 1-8tRNA-Arg(tct)c[72650,72725]  
 tggtcagtagctcagttggatagagcaactgccttctaagcagtcggtc  
 gctgggtcagtcagcctggatcgt  
 >KY942056.1 Dickeya phage JA15, complete genome  
 1-1tRNA-Met(cat)[131324,131400]  
 gatggtgtagttcagttggttagaacgtgcgactcataatcgctttgtca  
 ctggttcaagtcctgccgccatcgcca  
 >KY942057.1 Dickeya phage XF4, complete genome  
 1-1tRNA-Met(cat)[129075,129151]  
 gatggtgtagttcagttggttagaacgtgcgactcataatcgctttgtca  
 ctggttcaagtcctgccgccatcgcca  
 >KU886224.1 Erwinia phage vB\_EamM\_RAY, complete genome  
 1-1tRNA-Asn(gtt)[165666,165741]  
 tggctctatagttcagtcggtagaacagcggactgtaatccgtaggtcgc  
 tgggtcgaatccagctagaccagcca  
 >KU886223.1 Erwinia phage vB\_EamM\_Simmy50, complete genome  
 1-1tRNA-Asn(gtt)[165487,165562]  
 tggctctatagttcagtcggtagaacagcggactgtaatccgtaggtcgc  
 tgggtcgaatccagctagaccagcca  
 >KT363872.2 Citrobacter phage Mordin, complete genome  
 1-1tRNA-Pro(tgg)[28230,28306]  
 ctccatttagctcagcttggtagagcgttccgttggggcggttaaggccg  
 aaggttcaagtccttcaatggagacca  
 1-2tRNA-Glu(ttc)[28313,28390]

attcccgtagacaaattaggtaaagtcaacacccttcaaggtgtggtt  
gagggttcaagtccttcgggaatgcca  
1-3tRNA-Met(cat)[28478,28554]  
tcgggtatagagaagggcgtctcacatgtctcattagcatggatcgg  
taggttcgactcctacacccgcctcca  
1-4tRNA-Asn(gtt)[28639,28715]  
ggtaggaagcacataaggcatgtcggtcggctgtaaccgaatggcac  
agggttcgaatccctgactaaccgcca  
1-5tRNA-Asp(gtc)[28879,28955]  
ggttatgtagttaactggcmetaaacctccctgtcacggaggatgatg  
agggttcgaatcccttcgtaaccgcca  
1-7tRNA-Lys(ttt)[29406,29481]  
ggaagtgtagcagaatggtagcggcagacttttaactctgacaggcgac  
gggttcgaatccctccacttctacca  
1-8tRNA-Met(cat)[29488,29564]  
gggtcagtcgcagataaggtaatgcaagggttcataagccctatgaatg  
tgggttcgattcccacctgaacctcca  
1-9tRNA-Ile(gat)[29567,29642]  
gctggtatagttaagaagggtataaacctcccctgataagggaatatcgg  
tgggttcgattccacctaccagtacca  
1-10tRNA-Arg(tct)[29891,29967]  
gcacccttagttcaaacggatagagcaacggcttctaaaccgtcagtta  
cagggttcgaatccctgtagggtgtgcca  
1-11tRNA-Ser(tga)[30358,30447]  
ggtaggtagcggctaataaggaagcaaatagcttgaaaactattgccatt  
gtagagatacggtaggggttcgactccttatctaccgcc  
1-12tRNA-Leu(tag)[30700,30777]  
gggagattgacggtaattggtaacctaccatccttagaagttggtgtt  
gagggttcgaatccctgtctctacca  
1-13tRNA-Lys(ctt)[30785,30860]  
gcaggtgtagcaaatgggtatgcggctgactcttaacagtaagacgat  
gggttcaattccctccacctgtacca  
1-14tRNA-Ala(tgc)[30867,30942]  
ggggtcatagtttatatggttaaaatccgagtttgcaaacttggaact  
gagttcaattctcagtactccacca  
1-15tRNA-Gly(tcc)[30949,31023]  
gcatccatagtttaaatgggaaaactacagtcttccaaactgaagttgag  
ggttcgattccctctggatgctcca  
1-16tRNA-Thr(tgt)[31030,31105]  
gctcttatcgataattggtattacgggtgccttgtaagcaacttatca  
gggttcgaatccttgtggagcacca  
1-17tRNA-Val(tac)[31201,31275]  
gctcgcttagtttatatggtaaagcccatccttacaagttggtgaagaa  
ggttcaagtccttcagcgagtacca

1-18tRNA-Leu(caa)[31277,31354]  
 gtccagtatcccaattggcagaggatgcaagctcaaacctgtattagt  
 gacggttcgaatccgtcttggacacca  
 1-19tRNA-Arg(acg)[31533,31609]  
 gcagaattagttaaaggacagagcagcaacctacgaagtgttagtta  
 ggggttcgaatcctctattctgcacca  
 1-20tRNA-Gln(ttg)[31619,31694]  
 aggggattagtttacacggttaaacctcggctttgaaatcgaagaaga  
 tggttcaattccatcatccccgccca  
 1-21tRNA-Leu(taa)[31697,31775]  
 gctccattactccaattggcagagaggccagattaaaatctgtgtatg  
 tatcgggtcgaatccgatatggagtacca  
 1-22tRNA-Gln(ctg)[31782,31857]  
 agcagtatagcataactggcaatgctccagcctctgaagctgaaagatta  
 aggttcaaatccttatactgtgccca  
 1-23tRNA-His(gtg)[31889,31965]  
 gtggccttatcataaatggataatgacctatgctgtgaacatggctcata  
 cgggttcgattcccgtaggtcacccca  
 1-24tRNA-Phe(gaa)[31973,32048]  
 agctcaattagcttatatggttaaagcgcgtgtctgaaaaacatgagaac  
 aggggttcaaatcccgatgggctacca  
 1-25tRNA-Ser(gct)[32801,32893]  
 ggaagattaaccctaaaaggttaaggagcagtttgctaaactgccagtaa  
 ccgagaaatcggcgtagcagttcaagtctggtatcttctcca  
 1-26tRNA-Cys(gca)[32900,32975]  
 gtatcgggtgacagaaatggatatgtccctgtctgcaaacaggtttatga  
 ggggttcaagtccctccgatactcca  
 >HQ728263.1 Erwinia phage vB\_EamM-M7, complete genome  
 1-2tRNA-Pro(tgg)[5012,5089]  
 ctccgttagctcagtaggatagagtaggccgttggggcggcgggtc  
 gaaggttcaaatccttcaacggagacca  
 1-3tRNA-Ala(tgc)[5210,5282]  
 gggtcagtagcttaattgggaaagcatctcacttgcaatgagaaggatga  
 ggggttcaagtccctcctgtatcc  
 1-4tRNA-Met(cat)[5465,5539]  
 agcgggatggagcagtggtagcttgccagttcattatctggaggtcgt  
 ggttcgaatcctactcccgttcca  
 1-5tRNA-Asn(gtt)[5548,5623]  
 ggggttgaagcacatatggatgtcggctggctgttaaccagatggtagt  
 ggggttcgagtcacaccttccccgccca  
 1-6tRNA-Tyr(gta)[5630,5712]  
 gcgtctatggcagagatggatcaatgcagcggctgtgaaaaccgccccgaa  
 aggttactggttcgagtcagttaggcgacca  
 1-7tRNA-Met(cat)[5719,5792]

tgccaagtagtgaaatggcatcactaggtttcattatccggtaggta  
gttcgaatctacccttcgcatcca  
1-8tRNA-Asp(gtc)[5872,5948]  
ggggatgtggcagacttggaattgtaccgcactgtctatcggaatatg  
agggttcaaatcccttcacctcgcca  
1-9tRNA-Ser(tga)[6175,6265]  
ggaagggcaaatcgactggcgacgaaaacggcttggaaaaccgccgagcg  
ttaatagcgcttgagggttcgactccctctccttcgcca  
1-10tRNA-Phe(gaa)[6267,6341]  
ggcttaattagcttatatggtaaagcaacggcttgaaaagccgtggaaca  
gggttcgaatcccgatagaccgcca  
1-11tRNA-Lys(ttt)[6349,6424]  
cgggtgtgaactcaattggcagagtgggtggctttaaccacagggttgc  
agggttcgatgcctgtcacaccgacca  
1-12tRNA-Lys(ctt)[6433,6509]  
ggactattaactcaactggtcagagtaccgcactttaatcgggaggttc  
agggttcgactccctgatatgtacca  
1-13tRNA-Met(cat)[6521,6594]  
agtggatggcagagatggatcatgcacttccttcatacgaagcctacat  
cggttcaagtccgattaccacttc  
1-14tRNA-Ile(gat)[6608,6682]  
tgtgggtagcataaatggtaatgcaaacgcctgataagcgtagaagag  
ggttcgataccctcacctacgacca  
1-15tRNA-Gln(ttg)[6689,6764]  
cggggtatggagtaattggcaactctacggttttgaggccgtcagttt  
cgggttcgaatccgaatgccccgcca  
1-16tRNA-Arg(tct)[6771,6847]  
gcacccttagaaciaaacggatagttccactgtcttctaacagttagta  
caggttcgaatcctgtagggtgtgcca  
1-17tRNA-Leu(caa)[7266,7342]  
ggcgtaatatccaattggcagaggaagcaggttcaaaccctgttcagt  
tgggttcgactcccacttacgtacca  
1-18tRNA-Gly(tcc)[7473,7548]  
gcaagtatgatgtcaatagtaacatggcgtcctccaagtcgctcttgc  
gggttcgagtcgctacttgcacca  
1-19tRNA-Trp(cca)[7555,7630]  
agggggttagtttaactggcaaaatatcggttccaaaccgtaagtga  
agggttcgaatccttcaccccttgcca  
1-20tRNA-Thr(tgt)[7640,7714]  
gcctccatcatataagggtattatgcctgttttgtaatcaggatcgcg  
ggttcgaatccgtgtggggcacca  
1-21tRNA-Val(tac)[7721,7796]  
actcgtatagctcagatggtagagcgcatcttacacgttgctgtgtcag  
gcgttcgagtcgcttcgagtagta

1-22tRNA-Leu(aag)[7803,7880]  
 ggctgtgtagcccaacttggcagaggcactacgctaagaacgtattcagt  
 gtgggttcgaatccctccacagctacca  
 1-23tRNA-Arg(acg)[7887,7963]  
 agacctttatcttaaatggacagagactcaagctacgaacttgagaggtt  
 cgggttcgaatcccgaaggtcttcca  
 1-24tRNA-Gln(ctg)[7966,8042]  
 aggatgttcgtatagttggcctattacaccggactctgaatccggttacg  
 atgggttcgagtcacacgtcctgccca  
 1-25tRNA-Leu(taa)[8049,8125]  
 aggtgattaccccaattggcagaggtaggagcttaaacctccgatgttg  
 agagttcgaatctctcatcacctacca  
 1-26tRNA-His(gtg)[8129,8205]  
 gaggttggtatcataaatggataatgaccctgactgtgaatcaggctctatg  
 cgggttcgaatcccgtccttctcccca  
 1-27tRNA-Ser(gct)[8212,8304]  
 ggaagattaaccctaaatggtaagggaagtgttgctaaactcagtaa  
 ccgagaaatcggcgtaccagttcaagtctggatcttctcca  
 >KP869100.1 Escherichia coli O157 typing phage 1, complete genome  
 1-1tRNA-Cys(gca)c[10198,10273]  
 gaatccgtgacagaaacggctatgtgcctgtctgcaaaacaggttataa  
 gggttcgagtccttcggattctcca  
 1-2tRNA-Ser(gct)c[10278,10370]  
 ggaagattaaccctaaaaggtaaggagcagtttgctaaactgccagtag  
 ctgagaaatcgggtgtaccagttcaagtctggtatcttctcca  
 1-3tRNA-Phe(gaa)c[11124,11199]  
 agtccaagtagcttatatggttaaagcgtgtctgaaaaacatgagaag  
 agggttcaaatcccactggactacca  
 1-4tRNA-His(gtg)c[11206,11281]  
 gtggccttatcataaatggtaatgacccatgctgtgaacatggctctatac  
 gggttcaaatcccgtaggtcacccca  
 1-5tRNA-Gln(ctg)c[11313,11388]  
 agcgggtatagcataactggcaatgcagcagctctgaagctgtcctatta  
 aggttcaaatccttatgccgtgccca  
 1-6tRNA-Leu(taa)c[11394,11472]  
 gctccattactccaattggcagagagccagacttaaaatctgtgttatg  
 tatcgggtcgaatccgatatggagtacca  
 1-7tRNA-Gln(ttg)c[11475,11550]  
 aggggattagtttacaaggttaaaacctcggtcttgaaatcgaagaagt  
 tggttcaattccaacatcccccgcca  
 1-8tRNA-Arg(acg)c[12373,12448]  
 gcaggattagttcaaatggaagagcaacagctctacgaagctgttaatatg  
 gggttcgaatcccttatcctgcgcca  
 1-9tRNA-Leu(caa)c[12454,12531]

gttcagtatcccaattggcagaggatgcaagctcaaacctgtattagt  
gacggttcgaatccgtcttggaaacacca  
1-10tRNA-Val(tac)c[12533,12607]  
actcgcttagtttatatggtaaaacatcaccttacaagatgaagaaaa  
ggttcaagtcctttagttagtacca  
1-11tRNA-Thr(tgt)c[12704,12779]  
gctcctatcgataattggttattacggttgccttgaagcaacttatca  
gggttcgagtccttgtgggagcacca  
1-12tRNA-Gly(tcc)c[12787,12861]  
gcatccatagtttaaacgggaaaattacagtcttccaaactgaggttgag  
ggttcgattccctctggatgctcca  
1-13tRNA-Ala(tgc)c[12868,12943]  
ggggcatagtttatatggtaaaattcgagtttgcaaacttggaact  
gagttcaattctcagtactccacca  
1-14tRNA-Lys(ctt)c[12950,13025]  
gcagggtgtagcaaaatggttatgcggctgactcttaatcagtaagacgat  
gggttcaattccctccacctgtacca  
1-15tRNA-Leu(tag)c[13033,13109]  
gcacctatagcccaactggtagaggcagcagacttagaatctgctcagtg  
tgagttcgaatctctctaggtgtacca  
1-16tRNA-Ser(tga)c[13364,13453]  
ggtaggtagcggctaattggcagccaaacagtcttgaaaactgttgccact  
gtagagatacggtaggggttcgactcctttactaccgcc  
1-17tRNA-Arg(tct)c[13692,13768]  
gcacccttagttcaattggatagagcaacggcttctaaatcgtagtta  
caggttcgaatcctgtaggggtgtacca  
1-18tRNA-Ile(gat)c[14015,14090]  
gctggtatagttaagaaggttataacactcccctgataagggaacatcgg  
tggttcgattccacctaccagtacca  
1-19tRNA-Met(cat)c[14092,14168]  
ggttcagtcgcagataaggtaatgcaagggtctcataagccctatgaatg  
tgggttcgattcccatctgaacctcca  
1-20tRNA-Lys(ttt)c[14173,14248]  
ggaagtgtagcagaatggtgatgcggcagacttttaatctgacaggcgat  
gggttcgaatccctccacttctacca  
1-21tRNA-Asp(gtc)c[14678,14754]  
ggctatgtagtttaactggagaaaatactcccctgtcacgggagatgatg  
tgagttcaagtctcatcgtagccgcca  
1-22tRNA-Tyr(gta)c[14760,14847]  
gtgtcgttatcccgtagatggtagcgggtggggactgtaaatccctgtca  
ttgagactctgtaggttcgactcctacacggcacacca  
1-23tRNA-Asn(gtt)c[14857,14933]  
ggttaggaagcacataaggtatgtgcggtcgcctgttaagcgaatggcac  
agggttcgaatccctgactaaccgcca

1-24tRNA-Met(cat)c[15011,15087]  
 tgcgggtatagagaaggcgctctcacatgtctcattagcatggatcgg  
 caggttcgactcctgcacccgcctcca  
 1-25tRNA-Glu(ttc)c[15179,15256]  
 gttccagtagacaaaatggtaaagtcaccactctttcaaagtggatatt  
 gagggttcaaatcccttctggaacgcca  
 1-26tRNA-Pro(tgg)c[15264,15340]  
 ctctgttagctcagcttggtagagcgtccgtttggggcggttaaggccg  
 gaggttcaagtcctccaacagagacca  
 >KT321315.1 Enterobacter phage phiEap-3, complete genome  
 1-1tRNA-Met(cat)[48303,48379]  
 ggccccttagctcaataggtagagctaatacactcataatggtaggttcc  
 cggttcaaatcacgggaggggccacca  
 >KT001919.1 Klebsiella phage Miro, complete genome  
 1-1tRNA-Met(cat)[49904,49980]  
 ggccccttagctcaataggtagagctaatacactcataatggtaggttcc  
 cggttcaagtcacgggaggggccacca  
 >MF044457.1 Escherichia phage ST0, complete genome  
 1-1tRNA-Gln(ttg)[155681,155754]  
 tgggaattagccaagtggtaaggcactggatttgcattccaggatgcaa  
 aggttcgagtcctttattcccagc  
 1-2tRNA-Leu(taa)[155755,155841]  
 gcgagaatggccaaattggtaaaggcacagcacttaaaatgctcggaat  
 gatttccttggtggttcgagtccttctcgacca  
 1-3tRNA-Gly(tcc)[155847,155920]  
 gcggatatcgataatggcattacctcagactccaatctgatgatgta  
 gttcgattctcattatccgctcca  
 1-4tRNA-Pro(tgg)[155931,156005]  
 ctccgtgtagctcagtttggtagagcgctgattgggatcaggaggtcc  
 aaggttcaaatccttgatggagac  
 1-5tRNA-Ser(tga)[156007,156096]  
 ggaggcgtggcagagtggtttaatgcaccggtcttgaaaaccggcagtcg  
 ctccggcgactcataggttcaaatcctatcgctccgcca  
 1-6tRNA-Thr(tgt)[156102,156177]  
 gctgatttagctcagtaggtagagcaactcacttgtaatgagaaggtcgg  
 cggttcgattccgtcaatcagcacca  
 1-7tRNA-Met(cat)[156179,156253]  
 ggccctgtagctggaaggttaagcaagcgactcataatcgccagatggt  
 ggttcaattccaccagggccacca  
 1-8tRNA-Tyr(gta)[156266,156352]  
 ggggagttatccgtagaggtagcgggtgtggactgtaaatccattgtcat  
 tgcgactcgggtggttcgactccatcactccccacca  
 1-9tRNA-Asn(gtt)[156357,156431]  
 ggatgtgtagctcaatggcagagcgatcgctgttaagcgattggttata

ggttcgaatcctatcacgtccgcca  
 1-10tRNA-Arg(tct)[156436,156511]  
 cgaggcatagctcagaaggaagagcaaggaccttaagtcctaggtcgt  
 aggttcgatccctactgtctcgacca  
 >MF044458.1 Escherichia phage ST32, complete genome  
 1-1tRNA-Leu(cag)c[37452,37546]  
 ggacgagtagctcagaaggttgcattgtgctcagtcaggtagagcaatc  
 tgttcgacagatgtgtcgttggttcgaatccaacctcgtccgcca  
 >JN204348.1 Mycobacterium phage Sebata, complete genome  
 1-1tRNA-Ser(gct)[32038,32121]  
 ggagggtgagcatctggtgatgcaggggtcctgctaaggccctacggatt  
 cacaccgtgagtttcgattactcctccctccgc  
 1-2tRNA-Leu(cag)[32218,32294]  
 gccctgctgagcaactggcaaagctgccgcattcagagtgcgggtcatt  
 tccgggttcgactcccgggcagggtac  
 1-3tRNA-Leu(gag)[32414,32488]  
 gtctctgtaggcaaatcgaaaagcccatcttgaggggtggtgcgtg  
 cgggttcgactcccgcagagacac  
 1-4tRNA-Leu(caa)[32489,32562]  
 gccgtgtaggccatctggcgagccgccagttcaagttcgggtgttgc  
 ggggttcgaatcccggccacggtac  
 1-5tRNA-SeC(tca)[68899,68995]  
 attctggcactggtggcgagcccaccggcgagcttcaagctgtcgct  
 ggccggagaaccgaccggaacatccgttcaacgcgacccagggcc  
 1-6tRNA-Pro(tgg)[92897,92971]  
 cggggtgtagttcagtttgaagagcgcttggtttgggaccaagatgtcg  
 caggttcgaatcctgtcaccgccgac  
 1-7tRNA-Trp(cca)[92986,93056]  
 gggctgtgtgcacagggtgcccgcggtctccaaagccgaaggcgggggtt  
 cgattccctccaggcctgcca  
 1-8tRNA-Pyl(cta)[94193,94265]  
 gcaccatttgctcaatggcagagcggcggttctaaaaccgtgagtgtcg  
 gttcgactccggcatggtgcacc  
 1-9tRNA-Met(cat)[94415,94489]  
 agcgggtgtagagcagctaggtagctcggggtcatgaccggaggacg  
 cgtgttcgattcacgccaccgccac  
 1-10tRNA-Cys(gca)[94616,94687]  
 gcgcctttggcggaatggctacgtgctcggctgcaacccgagttatcccg  
 gttcgactccgggaggcgctc  
 1-11tRNA-Glu(ctc)[94755,94826]  
 gctcccatggggtagtggttaaccctcctggttctcagccaggcgtcccg  
 gttcgatcctcggtgggagtg  
 1-12tRNA-His(gtg)[94828,94901]  
 gtggccgtagttcagccggtagaacgtgggttgtgatccagtcgtcga



gggttcgagtcctccggtcaccc  
1-13tRNA-Ala(tgc)[95065,95138]  
gggcctatagctcatctggtagagcgctgccttgaagcaggaggcggc  
aggttcaagtcctgttaggtccac  
1-14tRNA-Phe(gaa)[95327,95399]  
gccgtcatagctcagttggtagagcaccggcctgaaaacccggtggccga  
ggttcgagtcctcgtgtcggcac  
1-15tRNA-Val(cac)[95405,95478]  
gtccgttagctcagctggaagagcgctcggccacacccgagaggccgc  
aggttcgatccctgcaatggacac  
1-16tRNA-Lys(ctt)[95597,95669]  
gccttcgtagctcagtggtagagctgtcgcctctaagcgataggtcgtt  
ggttcaaatccagccgggggcac  
1-17tRNA-Glu(ttc)[95673,95747]  
ggtcgggtggtctgttgccaggccggtcgggttttccccggacattcg  
cgggttcaattcccgtcccgtatcgc  
1-18tRNA-Gly(tcc)[95827,95899]  
gcggtgtggccgaatggctcaggcaccagatttccactctggctacgca  
ggttcgattcctgtcatccgctc  
1-19tRNA-Thr(cgt)[95981,96055]  
gctgctgtagctcacctggtagagcgtcggcgtcgtatcccgaaggcatc  
cggttcgagtcggacagcagcccc  
1-20tRNA-Thr(tgt)[96056,96128]  
gcctctgtgtccagcggcacggacatccgccttgaagcggaggacccc  
cggttcgatccgggtagaggctc  
1-21tRNA-Thr(ggt)[96536,96608]  
gctgggttagctcagtggtagagcgttcctctggtatgggaaaggccggg  
ggttcaatccccgactcagctc  
1-22tRNA-Gly(gcc)[97931,98004]  
gcgaaggtagctcagctggcagagcgccaccttgccaaggtggaggtcgc  
gggatcgtaacccgttcttcgctc  
1-23tRNA-Asp(gtc)[98008,98080]  
ggccctgtagctcagaggaagagcgccggtctgtcgaatcggaggtcgcg  
gtatcgtaatccgtcagggtcgc  
1-24tRNA-Met(cat)[98140,98212]  
gcctcactagctcattggtagagccgctcgtcataacgtgcaggtacct  
ggttcgattccagggtgaggtac  
1-25tRNA-Ile(gat)[98218,98292]  
gcctgttagcggactggtcgtccgatccaagctgataacttggcgtaagc  
ggtgttcgattcaccgagcaggtac  
1-26tRNA-Arg(acg)[98386,98458]  
gcctctatggtccaacggatatgacccggtctacggaaccggagatgcg  
tgttcgattcgcgctaggggcac  
1-27tRNA-Val(gac)[98501,98573]

gtccgtgtagctcagggtagagcgctgctcgacacgcaggaggaccga  
ggttcgaaacctcgcatggacac

1-28tRNA-Arg(cct)[98747,98820]

gcctctgtagctcaacggacagagcaacgcggctctaacgcggtggctgg  
aggttcgaatcctctcggaggcac

1-30tRNA-Gln(ttg)[99361,99436]

tggggatgggtggcaatctggcagtcgccgagcttgaactccggaggt  
gcaggttcgagtcctgctaccccatc

1-31tRNA-Arg(tct)[99440,99515]

gccctgttagctcagtgagacagagcggcgagcttctacctcgccggccgg  
gagttcgaatctctccagggcacca

1-32tRNA-Gln(ctg)[126655,126729]

tgctcgttggtgtaactggcaacactacggactctgactccgtcattta  
ggttcgaatcctaagcgagcagcca

1-33tRNA-Asn(gtt)[126736,126809]

tgggggtgccgttaatcaggcaacgagcggactgttaatccgccctgc  
aggttcgaatcctgccacccaccg

>MF042360.1 Pseudomonas phage Phabio, complete genome

1-1tRNA-Ser(tga)c[294586,294674]

ggagagatggccgagtggttaaggcggcggtcttgaaccgcaggtcc  
tatcgggaccctagagttcgaatctctatctcgcgcca

1-2tRNA-Leu(taa)c[294680,294765]

acgggattggtggaatcggtagacacaccagacttaaaatctgttgcct  
tagagcgtgcgagttcgagtcgcacccgtacca

1-3tRNA-Asn(gtt)c[296411,296486]

ttcgagatagctcagttggtagagcagcgactgttaatccgttggtccc  
aggttcgaaccctggtctcggagcca

>MF036691.1 Serratia phage CBH8, complete genome

1-1tRNA-Leu(taa)c[70949,71033]

gcatcgatggtggaactggtatacacagagacttaaaatctcccgccgc  
aaggattgagggttcgaatccctctcgtgcacca

1-2tRNA-Arg(tct)c[71039,71115]

cgaggcatagctcagttgtagagcagtgacttctaaccaccggtcg  
aaagttcgaatcttctgtctcgacca

1-3tRNA-Met(cat)c[72200,72275]

ggccctgtagctcagcggtagagcgctcccctcataagggttggtcact  
ggttcgaatctcagtcagggtcacca

1-4tRNA-Gly(tcc)c[72662,72736]

gcatccatcgtagcggctattatgactggctccaccagtagatgag  
agttcgattctctctggatgctcca

1-5tRNA-Trp(cca)c[72738,72811]

aggtctctcgtagtggtattaccctgagctccaacctcagtgacgtgg  
gttcaattcctacggggcctgcca

1-6tRNA-Ile(gat)c[72980,73055]

gcgaatatagctcagttggtagagcaaccgcccataagcggtaggtccc  
 tggttcgagcccaggtattcgacca  
 1-7tRNA-Pro(tgg)c[73060,73137]  
 ctccgtgtagctcagtttggtagcagcgctggttgggaccaggaggtc  
 caaggttcaaactcttgcattggagacca  
 1-8tRNA-Ser(tga)c[73410,73503]  
 ggaagattggcagagctggctaattgcaccacactgaaatgcggaggt  
 cctgggtgacaggtcccgtgagttcgaatctcacatcttctcca  
 1-9tRNA-His(gtg)c[73508,73583]  
 gtggccgtagttcagttggtagaaccctaattgtgattcaggatgtcgt  
 ggattcgagttccaccggtcacccca  
 1-10tRNA-Gln(ttg)c[73680,73755]  
 tagggtatagccaagttggttaaggcaggagattttagttctccatgctc  
 tggttcgagtcagataccctagcca  
 1-11tRNA-Met(cat)c[74196,74272]  
 tgcgggttaacttcagttggtagaatgacgggtcatatcccgttacgcg  
 atggttcgagtcacatccccgcctcca  
 1-12tRNA-Asn(gtt)c[74398,74481]  
 gggtagttggctgagcgggttaagcggcgactgtaatccgtgtcgaaa  
 gacaacgtaggttcgaatcctacactaccgcca  
 1-13tRNA-Lys(ttt)c[74489,74565]  
 gggatattagctcagttggttagagcaccggacttttaatccgggtgcc  
 atggttcgagtcacatgatgtccacca  
 1-14tRNA-Glu(ttc)c[74571,74645]  
 gctctgttcgtctatcggttaggacgccttccttcacgcaggaaagagg  
 agttcaattctctacagagtacca  
 1-15tRNA-Asp(gtc)c[74650,74725]  
 ggacctatagtttcagcgggttaaatactcccctgtcacgggagcgtcac  
 gatttcgaatctcgttaggtccgcca  
 1-16tRNA-Tyr(gta)c[74732,74820]  
 gcgttgatgaccagagtggaagggaggagactgtaaatcttctgcttg  
 taatgagcttcgtaggttcgagtccttctcggcgacca

>MF036690.1 Serratia phage CHI14, complete genome

1-1tRNA-Leu(taa)c[70949,71033]  
 gcatcgatgggtggaactgggtatacacaggagacttaaaatctcccggcgc  
 aaggattgagggttcgaatccctctcgtgcacca  
 1-2tRNA-Arg(tct)c[71039,71115]  
 cgaggcatagctcagttggtatagcagtggaacttctaaccaccggtcg  
 aaagttcgaatcttctgtctcgacca  
 1-3tRNA-Met(cat)c[72200,72275]  
 ggcctgtagctcagcggtagagcgctcccctcataaggattggtcact  
 ggttcgaatctcagtcagggtcacca  
 1-4tRNA-Gly(tcc)c[72662,72736]  
 gcatccatcgtagcggctattatgactggctccaccagtagatgag

agttcgattctctctggatgctcca  
1-5tRNA-Trp(cca)c[72738,72811]  
aggtctctcgtatagtggtattaccctgagctccaacctcagtgacgtgg  
gttcaattcctacggggcctgccca  
1-6tRNA-Ile(gat)c[72980,73055]  
gcgaatatagctcagttggttagagcaaccgcccataagcggtaggtccc  
tggttcgagcccaggtattcgacca  
1-7tRNA-Pro(tgg)c[73060,73137]  
ctccgtgtagctcagtttggtagcagcgctggttgggaccaggaggtc  
caaggttcaaactccttgcattggagacca  
1-8tRNA-Ser(tga)c[73410,73503]  
ggaagattggcagagctggctaattgcaccacacttgaaatgcggaggt  
cctggtgacaggtcccgtgagttcgaatctcacatcttctcca  
1-9tRNA-His(gtg)c[73508,73583]  
gtggccgtagttcagttggtagaaccttaattgtgattcaggatgtcgt  
ggattcgagttccaccggtcacccca  
1-10tRNA-Gln(ttg)c[73680,73755]  
tagggtatagccaagttggttaaggcaggagatttgattctccatgctc  
tggttcgagtcagataccctagcca  
1-11tRNA-Met(cat)c[74196,74272]  
tgcgggttaacttcagttggtagaatgacgggttcatacccgttacgcg  
atggttcgagtcacatccccgcctcca  
1-12tRNA-Asn(gtt)c[74398,74481]  
gggtagttggctgagcgggttaagcggcgactgttaatccgtgtcga  
gacaacgtaggttcgaatcctacactaccgcca  
1-13tRNA-Lys(ttt)c[74489,74565]  
gggatattagctcagttggttagagcaccggacttttaatccgggtgtcc  
atggttcgagtcattgatgtccacca  
1-14tRNA-Glu(ttc)c[74571,74645]  
gctctgttctctatcggttaggacgccttccttcacgcaggaaagagg  
agttcaattctctacagagtacca  
1-15tRNA-Asp(gtc)c[74650,74725]  
ggacctatagtttcagcgggttaaaatactcccctgtcacgggagcgtcac  
gagttcgaatctcgttaggtccgcca  
1-16tRNA-Tyr(gta)c[74732,74820]  
gcgttgatgacccgagtggaaggggtggagactgtaaatcttctgcttg  
taatgagctcgtaggttcgagtccttctcggcgcacca

>MF036692.1 Serratia phage X20, complete genome

1-1tRNA-Thr(tgt)c[70617,70692]  
gccgatttagctcagtaggttagagcagctcacttgtaatgagaaggtcgt  
gggttcaattcctacaaccagcacca  
1-2tRNA-Arg(tct)c[71236,71311]  
gctcttatagtgtaatggatagcacacgatcgttctaaggtcggtagtct  
gggttcgagtcctagtaggagcacca

1-3tRNA-Leu(taa)c[71313,71399]  
gcgagaatgggtcaaattggtaaaggcacggcacttaaaatgccgcggagg  
gttctccttgtgggttcgagtccttctcgacca  
1-4tRNA-Met(cat)c[72484,72559]  
ggcctgtagctcagcggtagagcgctcccctcataagggttggtcact  
ggttcgaatctcagtcagggtcacca  
1-5tRNA-Gly(tcc)c[72946,73019]  
gcgtctatagtataatggaattatgactggcttcccccagtagatgaga  
gttcaattctccctagacgtcca  
1-6tRNA-Trp(cca)c[73027,73100]  
aggctctctgtatagtggtattaccctgagctccaacctcagtgacgtgg  
gttcaattctacgggcctgcc  
1-7tRNA-Ile(gat)c[73269,73344]  
gcgaatatagctcagttggtagagcaaccgcccataagcggtaggtccc  
tggtcgagcccaggtattcgacca  
1-8tRNA-Pro(tgg)c[73349,73426]  
ctccgtgtagctcagtttggtagcagcgctggttgggaccaggaggtc  
caaggttcaaatccttgcatggagacca  
1-9tRNA-Ser(tga)c[73699,73790]  
ggaagattggcagagaggctaattgcaccgcactgaaatgcggaggtcc  
tggcgacaggctccgtgagttcgaatctcacatcttctcca  
1-10tRNA-His(gtg)c[73795,73870]  
gtggccgtagttcagttggtagaacccctaattgtgattcaggatgtcgt  
gatttcgagttccaccggccaccca  
1-11tRNA-Gln(ttg)c[73967,74042]  
tagggtagccaagttggtaaggcaggagatttattctccatgctc  
tggtcgagtcagataccctagcca  
1-12tRNA-Met(cat)c[74482,74558]  
tgcgggttaacttcagttggtagaatgacgggtcatatcccgttacgcg  
atggttcgagtcacatccccgcctcca  
1-13tRNA-Asn(gtt)c[74684,74767]  
gggtagttggctgagcggtttaagcggcgactgttaatccgtgtcga  
gacaacgtaggttcgaatcctacactacccgcca  
1-14tRNA-Lys(ttt)c[74775,74851]  
gggatattagctcagttggttagagcaccgacttttaacgggtgtcc  
atggttcgagtcacatgatgtccacca  
1-15tRNA-Glu(ttc)c[74857,74931]  
gctctgttcgtctatcggttaggacaccaggtttcaacctgggaagagg  
agttcaattctcctacagagtacca  
1-16tRNA-Asp(gtc)c[74936,75012]  
ggctctatagttcaattggttaaaatactcccctgtcacgggaatgta  
cgagttcgagtcctgtaggaccgcca  
1-17tRNA-Tyr(gta)c[75019,75107]  
gcgtcgatgaccgagtggtgcaagggtggagactgtaaatctcctgcttg

taatgagcttcgtaggttcgagtccttcacggcgaccca  
 >KY979109.1 Salmonella phage SHP1, complete genome  
 1-tRNA-Met(cat)[6863,6936]  
 ggccctgtagctggacggtcaagcgagcgactcataatcgctggatggtg  
 gttcgattccaccagggccacca  
 1-2tRNA-Asn(gtt)[6941,7015]  
 ggatgtgtagctcagtggtagagcagttgactgttaatcaattggtccat  
 ggttcgaatccatgcatgtccgcca  
 1-3tRNA-Arg(tct)[7020,7095]  
 cgaggcatagctcagaaggaagagcaaggaccttctaagtcctgggtcgt  
 aggttcgatccctactgtctcgcca  
 >MF370225.1 Salmonella phage ST11, complete genome  
 1-tRNA-Pro(tgg)[22896,22972]  
 ctctgttagctcagcttggtagagcgttccgtttggggcggttaaggccg  
 gaggttcaagtcctccaacagagacca  
 1-2tRNA-Glu(ttc)[22980,23057]  
 gttccagtagacaaaatggtatagtcaccactcttcaaagtggatatt  
 gagggttcaaatcccttctggaacgcca  
 1-3tRNA-Met(cat)[23149,23225]  
 tgcgggtatagagaaaggcgtctcacatgtctcattagcatggtatcgg  
 caggttcgactcctgcacccgcctcca  
 1-4tRNA-Asn(gtt)[23309,23385]  
 ggtaggaagcacataaggtatgtcggtcgcctgttaagcgaatggcac  
 agggttcgaatccctgactaaccgcca  
 1-5tRNA-Tyr(gta)[23455,23542]  
 gtgtcgttatcccgtagatggtagcgggtggggactgtaaatccctgtca  
 ttgagactcggtaggttcgactcctacacggcacacca  
 1-6tRNA-Asp(gtc)[23548,23625]  
 ggttatgtagttaatttgggtaaaatactcccctgtcacgggagatgat  
 gagggttcaaatcccttcgtaaccgcca  
 1-7tRNA-Lys(ttt)[24052,24127]  
 ggaagtgtagcagaatggtgatgcggcagactttaatctgacaggcgat  
 ggggtcgaatccctccacttctacca  
 1-8tRNA-Met(cat)[24132,24207]  
 ggttcagtcgagataaggtaatgcaagggtctcataagcctatgaatgt  
 ggggtcgattcccatctgaacctcca  
 1-9tRNA-Ile(gat)[24210,24284]  
 tgtgggttagcataaatggtaatgcaaacggctgataaccgttagaagag  
 ggttcgataccctcacctacaacca  
 1-10tRNA-Ser(tga)[24999,25088]  
 ggtaggtagcggctaattggtagccaaactgtctgaaaacagttgccact  
 gtagagatacggtaggggttcgactccttacttaccgcc  
 1-11tRNA-Leu(tag)[25344,25421]  
 gggagattgacggttaattggtaaacctatctcgcttagaacgagatgttt

gaggttcgaatcccttgtctcctacca  
 1-12tRNA-Lys(ctt)[25429,25504]  
 gcaggttagcaaaatggttatgcggctgactcttaatcagtaagacgat  
 gggttcaattccctccacctgtacca  
 1-13tRNA-Ala(tgc)[25511,25586]  
 tgggtcatagtttatatggttaaaattcgagtttgcaaactgggaact  
 gattcaattctcagtgtactccacca  
 1-14tRNA-Gly(tcc)[25593,25667]  
 gcatccatagtttaaacgggaaaattacagtttccaactgaggttgag  
 ggttcgattccctctggatgtacca  
 1-15tRNA-Thr(tgt)[25876,25952]  
 gctgcttcgtataattggctattacacatccctgttaaggatggaaatg  
 cagggttcgagtcctgtgagcagcacca  
 1-16tRNA-Val(tac)[26048,26122]  
 actcgcttagtttatatggtaaaacatcacccttacaagatgaagaaaaa  
 ggttcaagtcctttagtgagtacca  
 1-17tRNA-Leu(caa)[26124,26201]  
 gtccagtatcccaattggcagaggatgcaagctcaaacctgtattagt  
 gacggttcgaatccgtcttggaaacacca  
 1-18tRNA-Gln(ttg)[26886,26961]  
 aggggattagtttacaagggttaaacctcggcttggaaatcgaagaagt  
 tgggtcaattccaacatccccgccca  
 1-19tRNA-Leu(taa)[26964,27042]  
 gctccattactccaattggcagagaggccagacttaaaatctgtgtatg  
 tatcggttcgaatccgatatggagtacca  
 1-20tRNA-Gln(ctg)[27048,27123]  
 agcggtatagcataactggcaatgcagcagtcctgaagctgtcctatta  
 aggttcaaatccttatgccgtgccca  
 1-21tRNA-His(gtg)[27155,27230]  
 gtggccttatcataaacggtaatgacccatgctgtgaacatggctctatac  
 gggttcaaatcccgtaggtcacccca  
 1-22tRNA-Phe(gaa)[27237,27312]  
 agtccaagtagcttatatggttaaagcgcgtgtctgaaaaacatgagaag  
 agggttcaaatcccactggactacca  
 1-23tRNA-Ser(gct)[28065,28157]  
 ggaagattaaccctaaaaggtaaggagcagtttgctaaactgccagtag  
 ctgagaaatcgggtgtaccagttcaagtcgtgtatcttctcca  
 1-24tRNA-Cys(gca)[28162,28237]  
 gaatccgtgacagaaatggatatgtgcctgtctgcaaaacaggtttataa  
 gggctcaagtccttcggattctcca

>MF351863.1 Synechococcus phage Bellamy, complete genome

1-tRNA-Leu(taa)[23706,23791]  
 tgggagcgtggcggaatcggttagacgcaccagacttaaaatctgttgaga  
 attatctcgtgggggttcaagtcccccgctcctat

1-2tRNA-Thr(tgt)[24100,24173]  
gccaaacttagctcagctggatagacagggtttttaaagctcaggtca  
tcggttcaagtcgatatgttgct  
1-3tRNA-Ala(tgc)[143368,143440]  
ggggttatagctcagttggtagagcgctgctttgcaagcaggatgtcag  
cgggtcagtcgcttaactcca  
1-4tRNA-Arg(tct)[155413,155487]  
gactcgctagctcagttggatagagcaactgccttctaagcagtcggtcg  
aagggtcagtccttcgcgagtcgc  
1-5tRNA-Gly(tcc)[155539,155609]  
gcgagtggtgtagcggtaacatgcgagcctccaagctctgtcacgg  
gttcgatccccgtcactcgct  
1-6tRNA-Asn(gtt)[155736,155808]  
tcctctatagctcagttggtagagcaggtgactgttaatcacctgtccc  
tgggtcagtcaggtggaggag  
1-7tRNA-Val(tac)[155812,155883]  
gggagttggcgagcggtagcgcatctgctttacacgcagctggtcact  
ggttcgatcccagtaactcca  
1-8tRNA-Ser(tga)[156157,156243]  
ggaagagtggtcagtggttatggcactggtcttgaaccagcgaggg  
tgcaagtcctcgtgggtcaaaccacactcttcg  
1-9tRNA-Pro(tgg)[156693,156766]  
cggggtgtagctcagttggtagagcactcgcttgggagcgagtgccg  
aagggtcaaactcttcacccga  
1-10tRNA-Met(cat)[156959,157031]  
gggggttagcaatctggtgaatgcagcaactcataattgcctaaggt  
gagttcgatcctcacaacccta

>MF370964.1 Pseudoalteromonas phage SL20, complete genome

1-1tRNA-Lys(ttt)c[2264,2333]  
gccttcgtagctaactagtaagcgacttacttttaatgaggatatgttg  
ttcaattccaaccgaaggca  
1-2tRNA-Arg(tct)c[2335,2411]  
gcaagagtagaacaattggatagttcatctcccttctaaggagacggttg  
taagttcgaatcttacctcttgcca  
1-3tRNA-Val(cac)c[41928,41998]  
atttcctctggtgtaaggaaaccactgtattcacgttcagtaaactttt  
gttccaatcctgaatgaaatc

>MF448340.1 Aeromonas phage AS-zj, complete genome

1-1tRNA-Thr(tgt)c[168891,168966]  
gccgaattagctcatctgtagagcacagccttgaacgctgggggtggt  
ccgttcgagtcggacattcggcacca  
1-2tRNA-Pro(tgg)c[169245,169320]  
cgggtattagcgcagttggtagcgcgtctggttgggaccagagggtcac  
agggtcagtcctgtatcaccgacca



1-3tRNA-Tyr(gta)c[169475,169565]  
 ggatgttcggctacgatggcggtagcgcgactgtaaatccgttccc  
 tctgggtaaacagttggtcgaatccaacagcatccacca  
 1-4tRNA-Asn(gtt)c[169572,169647]  
 tggcgtgtagttcagtaggtagaacagcggactgttaatccgtatgtcgt  
 ggggtcgaatcccacctcgccagcca  
 1-5tRNA-Met(cat)c[169649,169726]  
 agcggggtggagaagtccaggattctcgccagactcattatctggaatc  
 ggtgggtcaaatccacctcccgttcca  
 1-6tRNA-Met(cat)c[170108,170184]  
 ggccccttagctcagttggtagagcaaccgactcataatcggttgggtca  
 ctggttcgagtcagtagggccacca  
 1-7tRNA-Gly(tcc)c[170269,170344]  
 gcgggtaagggtttatggatacatgcaagcctccaagttgagtagac  
 cggatcgttaccggctacccgctcca  
 1-8tRNA-Leu(tag)c[170346,170429]  
 cgggatgtggtgaaattggcagacacactagattaggttctagcggcat  
 aggcgtgacgggtcagtcggatccatcccagcca  
 1-9tRNA-Arg(tct)c[170430,170506]  
 gcgctgttagctcagttggatagagcaacgttctttaaagcgtgggtca  
 ctggttcgaatccagtacggcgacca  
 1-10tRNA-Leu(taa)c[171527,171619]  
 gcgtgagtggcgaagttggtgaaacgcatcggacttaaaatccgatact  
 gcataatggcacatcgtgggttcgattcccacctcacgcacca

>MF288919.1 Bacillus phage AaronPhadgers, complete genome

1-1tRNA-Asn(gtt)[33350,33423]  
 gtgctttagctcagtcggtagagctgggtggtgtaaacactgtgtcgt  
 aggttcgattcctacctagcacgc  
 1-2tRNA-Glu(ttc)[33430,33506]  
 gtcgcattggtgaaattggttaacacactcggcttctaccgaggttta  
 ggggttcgagccccctatgcgattcca  
 1-3tRNA-Asp(gtc)[33511,33584]  
 tggggatatagttagaggtaaacacgcacggctgtctaccgtgaagcac  
 gagttcgaatctcgttatcctcgt

>MF288922.1 Bacillus phage Janet, complete genome

1-1tRNA-Asn(gtt)[32103,32177]  
 tgtgctttagctcagtcggtagagcgccagattgttaatctgagggtcg  
 caggttcgattcctgcttggcacgt  
 1-2tRNA-Trp(cca)[32939,33012]  
 gggagtttagtttagtgtaaacctcggctcctccaaaccgaagtcatat  
 gttcgattcgtagctcctgccca  
 1-3tRNA-Ser(tga)[33014,33101]  
 ggagggttggcagagtggtattatgcagcggctctgaaaaccgccgaggg  
 taaaacctccgtgagttcaaatctcacacctcctcca

1-4tRNA-Asp(gtc)[33103,33176]  
 tggggatatagtgtagaggtaaacacgcacggctgtctaccgtgaagcac  
 gggttcgaatcccgttatcctcgt  
 1-5tRNA-Leu(tag)[33321,33398]  
 tgccgaagtaatccaatcaggtagagatagcggttttagaaaccgtccag  
 tgtgggttcgaccccccttcggtatc  
 1-6tRNA-Tyr(gta)[33405,33488]  
 tggcagaatagtcaagcggcaacgacaggtgactgtaaatcacccctcat  
 tcgagttcgtaggttcgagtcctgcttctgctat  
 1-7tRNA-Ser(gct)[34401,34487]  
 ggaggggtactcaagcggcgaagggggacttgctaagtcttagtacc  
 ttaacaggtagcgagggtcgaatccctcccctcct  
 >MF288921.1 Bacillus phage OTooleKemple52, complete genome  
 1-1tRNA-Asn(gtt)[31940,32014]  
 tgtgctttagctcagtcggtagagctgggtggctgtaaccactgtgtcg  
 ttggttcgattccaacctagcacgt  
 1-2tRNA-Trp(cca)[32179,32252]  
 gggagtttagtttagtggtaaacctcggctcctccaaaccgaagtcatal  
 gttcgattcgatagctcctgccca  
 1-3tRNA-Ser(tga)[32254,32341]  
 ggaggggtggcagagtggtattatgcagcggcttgaaaaccgacgaggg  
 taaaacctccgtgagttcaaatctcacacctcctcca  
 1-4tRNA-Asp(gtc)[32343,32416]  
 tggggatatagtgtagaggtaaacacgcacggctgtctaccgtgaagcac  
 gggttcgaatcccgttatcctcgt  
 1-5tRNA-Leu(tag)[32639,32716]  
 tgccgaagtaatccaatcaggtagagatagcggttttagaaaccgtccag  
 tgtgggttcgaccccccttcggtatc  
 1-6tRNA-Tyr(gta)[32723,32806]  
 tggcagaatagtcaagcggcaacgacaggtgactgtaaatcacccctcat  
 ttgagttcgtaggttcgagtcctgcttctgctat  
 1-7tRNA-Ser(gct)[33719,33806]  
 ggagaggtactcaagcgggaagaggttagtttgtaactaataggtcg  
 agtaatcggcgcgaggggtcgaatccctcccctccac  
 >MF285619.1 Serratia phage 2050H1, complete genome  
 1-1tRNA-Met(cat)c[20552,20627]  
 agtccttagctcaggggttagagcatgcgactcataatcgcttggtcgt  
 tggttcaaagccaacagggactacca  
 1-2tRNA-Cys(aca)c[22254,22345]  
 tggccgggtagctcaattggttagagtggcgcgctacagcctgaggcgac  
 attagcgcgatgttggttcgagaaccaccccgccaccc  
 >MF285618.1 Serratia phage 2050HW, complete genome  
 1-1tRNA-Tyr(gta)[265275,265359]  
 ggtaggttactcaagcggcaacgagaacagactgtaaatctgttccttc

gggcttcgatgggtcaggtccatcacctaccacca  
 >MF498901.1 Bacillus phage Anthony, complete genome  
 1-1tRNA-Asn(gtt)[32463,32537]  
 tgtgctttagctcagtcggtagagctggaggcttaaccactgtgtcg  
 ttggttcgattccaacctagcacgt  
 1-2tRNA-Trp(cca)[32704,32777]  
 gggagtttagtttagtggtaaaacctcggctcctccaaaaccgaagtcatat  
 gttcgattcgtagctcctgccca  
 1-3tRNA-Ser(tga)[32779,32866]  
 ggagggttggcagagtggtattatgcagcggcttgaaaaccgccgaggg  
 taaaacctccgtgagttcaaatctcacacctcctcca  
 1-4tRNA-Leu(tag)[33587,33664]  
 tgccgaagtaatccaatcaggtagagatagcggtttagaaaaccgtccag  
 tgtgggttcgacccctccttcggtatc  
 1-5tRNA-Tyr(gta)[33671,33754]  
 tggcagaatagtcgaagcggcaacgacagtgactgtaaatcacccctcat  
 tcgagttctcaggttcgagtcctgattctgctat  
 1-6tRNA-Ser(gct)[34667,34753]  
 ggaggggtactcaagcggcgaaggggggacttgctaagtccttagtacc  
 ttaacaggtagcaggggttcgaatcccttcccctcct  
 >MF158040.1 Shigella phage Sf13, complete genome  
 1-1tRNA-Cys(gca)c[11656,11731]  
 gtgtcgggtgcagaaatggttatgtgcctgtctgcaaaacaggttatga  
 ggggttcgagtccttccgatactcca  
 1-2tRNA-Ser(gct)c[11738,11830]  
 ggaagattaaccctaaaaggttaaggagcagtttgctaaactgccagtaa  
 ccgagaaatcggtaccagttcaagtctggtatcttctcca  
 1-3tRNA-Phe(gaa)c[12583,12658]  
 agctcaattagcttatatggttaaagcgcgtgtctgaaaaacatgagaac  
 agggttcaaatcccgatgggctacca  
 1-4tRNA-His(gtg)c[12666,12742]  
 gtgccttatcataatggataatgacctatgctgaacatggtctata  
 cgggttcgattcccgtaggtcacccca  
 1-5tRNA-Gln(ctg)c[12774,12849]  
 agcagtatagcataactggcaatgctccagcctctgaagctgaaagatta  
 aggttcaaatccttatactgctgccca  
 1-6tRNA-Leu(taa)c[12856,12934]  
 gctccattactccaattggcagagaggccagattaaaatctgtgtatg  
 tatcggttcgaatccgatatggagtacca  
 1-7tRNA-Gln(ttg)c[12937,13012]  
 aggggattagttacaaggttaaacctcggctcttgaaatcgaagaaga  
 tggttcaattccatcatccccgccca  
 1-8tRNA-Arg(acg)c[13021,13097]  
 gcagaattagttcaaatggacagagcagcaacctacgaagttgttagtta

ggggttcgaatcctctattctgcacca  
1-9tRNA-Leu(caa)c[13276,13353]  
gttccagtatcccaattggcagaggatgcaagctcaaacctgtattagt  
gacggttcgaatccgtcttggaaacacca  
1-10tRNA-Val(tac)c[13355,13429]  
gctcgcttagtttataggtaaagcccatccttacaagttggtgaagaa  
ggttcaagtccttcagcgagtacca  
1-11tRNA-Thr(tgt)c[13525,13601]  
gctgcttctgataattggctattgcacatcccttgaaggatggagatg  
cagggtcagtcctgtgagcagcacca  
1-12tRNA-Gly(tcc)c[13608,13682]  
gcatccatagtttaaatgggaaaattacagtcctccaaactgaggttgag  
ggttcgattccctctggatgctcca  
1-13tRNA-Ala(tgc)c[13689,13764]  
ggggatgtagtttacatgggtaaaacataagtttgcaaacttaagtaca  
gggttcaattccctgcttctccacca  
1-14tRNA-Lys(ctt)c[13771,13846]  
gcagggtgtagcaaaatgggtatgcggctgactcttaacagtaagacgat  
gggttcaattccctccacctgtacca  
1-15tRNA-Leu(tag)c[13854,13931]  
gggagattgacggtaattggtaaacctaccatcctagaagttggtgttt  
gagggttcgaatccctgtctcctacca  
1-16tRNA-Ser(tga)c[14182,14271]  
ggtagtagcggctaataaggaagccaaactgtctgaaaacagttgccatt  
gtagtgatacggtaggggttcgactcctttatctaccgcc  
1-17tRNA-Arg(tct)c[14533,14609]  
gcacccttagttcaaacggatagagcaacggcttcttaaaccgtcagtta  
cagggtcgaatcctgtaggggtgtgcca  
1-18tRNA-Ile(gat)c[14858,14933]  
gctggtatagtttaagaagggttataacactcccctgataagggaatatcgg  
tggttcgattccacctaccagtacca  
1-19tRNA-Met(cat)c[14936,15012]  
ggttcagtcgcagataaggtaatgcaagggttcataagccctatgaatg  
tgggttcgattccacctgaacctcca  
1-20tRNA-Lys(ttt)c[15094,15169]  
ggaagtgtagcagaatggtgatgcggcagacttttaatctgacaggcgac  
gggttcgaatccctccacttctacca  
1-21tRNA-Asp(gtc)c[15620,15696]  
ggttatgtagttaactgggtcaaaatacctccctgtcacggaggatgatg  
tgagttcgagtcctcatcgtaaccgcca  
1-22tRNA-Asn(gtt)c[15860,15936]  
ggttaggaagcacataaggcatgtcggtcggctgttaaccgaatggtac  
agggttcgaatccctgactaaccgcca  
1-23tRNA-Met(cat)c[16020,16096]

tgcgggtatagagaaaggtgtctcacatgtctcattagcatgtatcgg  
 taggttcgactcctacacccgcctcca  
 1-24tRNA-Glu(ttc)c[16184,16261]  
 attcccgtagacaaattaggtaaagtcaacacccttcaaggtgtggtt  
 gaggttcaagtccttcgggaatgcca  
 1-25tRNA-Pro(tgg)c[16268,16347]  
 ctccgttagctcagtttggttagcagcacttgcttgggagcaagggg  
 tcgaaggtcaaactcctcaacggagacca  
 >MF158041.1 Shigella phage Sf15, complete genome  
 1-1tRNA-Cys(gca)c[67419,67494]  
 gtgtcgggtgcagaaatggttatgtgcctgtctgcaaacaggttatga  
 gggttcgagtccttcgatactcca  
 1-2tRNA-Ser(gct)c[67501,67593]  
 ggaagattaaccctaaaaggaaggagcagtttgctaaactgccagtaa  
 ccgagaaatcgcgtagcagttcaagctcgtatcttctcca  
 1-3tRNA-Phe(gaa)c[68346,68421]  
 agctcaattagcttatatggttaaagcgcgtgtctgaaaaacatgagaac  
 agggttcaaatcccgatgggctacca  
 1-4tRNA-His(gtg)c[68429,68505]  
 gtggccttatcataaatggataatgacctatgctgaacatgggtctata  
 cgggttcgattcccgtaggtcacccca  
 1-5tRNA-Gln(ctg)c[68537,68612]  
 agcagtatagcataactggcaatgctccagcctctgaagctgaaagatta  
 aggttcaaatccttatactgtgcca  
 1-6tRNA-Leu(taa)c[68619,68697]  
 gctccattactccaattggcagagaggccagattaaaatctgtgtatg  
 tatcggttcgaatccgatatggagtacca  
 1-7tRNA-Gln(ttg)c[68700,68775]  
 aggggattagttacaaggttaaacctcggctcttgaaatcgaagaaga  
 tggttcaattccatcatccccgcca  
 1-8tRNA-Arg(acg)c[68784,68860]  
 gcagaattagttcaaatggacagagcagcaacctacgaagtgttagtta  
 ggggttcgaatcctctattctgcacca  
 1-9tRNA-Leu(caa)c[69039,69116]  
 gttccagtatcccaattggcagaggatgcaagctcaaacctgtattagt  
 gacggttcgaatccgtcttggaaacca  
 1-10tRNA-Val(tac)c[69118,69192]  
 gctcgcttagtttatatggtaaagcccatcctacaagttggtgaagaa  
 ggttcaagtccttcagcgagtacca  
 1-11tRNA-Thr(tgt)c[69288,69364]  
 gctgcttctgataattggctattgcacatccctgtaaggatggagatg  
 cagggttcgagtcctgtgagcagacca  
 1-12tRNA-Gly(tcc)c[69371,69445]  
 gcatccatagtttaaatgggaaaattacagtccttcaaactgaggttgag

gggtcgattccctctggatgctcca  
 1-13tRNA-Ala(tgc)c[69452,69527]  
 ggggatgtagttacatgggtaaaacataagtttgcaaaccttaagtaca  
 gggttcaattccctgcttctccacca  
 1-14tRNA-Lys(ctt)c[69534,69609]  
 gcaggtgtagcaaaatggttatgcggctgactcttaatcagtaagacgat  
 gggttcaattccctccacctgtacca  
 1-15tRNA-Leu(tag)c[69617,69694]  
 gggagattgacggtaattggtaaaccctaccatcctagaagttggtgtt  
 gagggttcgaatccctgtctctacca  
 1-16tRNA-Ser(tga)c[69945,70034]  
 ggtaggtagcggctaataaggaagccaaactgtctgaaaacagttgccatt  
 gtagtgatacggtaggggttcgactcctttatctaccgcc  
 1-17tRNA-Arg(tct)c[70296,70372]  
 gcacccttagttcaaacggatagagcaacggcttctaaaccgtcagtta  
 caggttcgaatcctgtaggggtgtgcca  
 1-18tRNA-Ile(gat)c[70621,70696]  
 gctggtagtagttaagaaggtataaacactcccctgataagggaatalcgg  
 tggttcgattccacctaccagtacca  
 1-19tRNA-Met(cat)c[70699,70775]  
 gggtcagtcgcagataaggtaatgcaagggttcataagccctatgaatg  
 tgggttcgattccacctgaacctcca  
 1-20tRNA-Lys(ttt)c[70857,70932]  
 ggaagtgtagcagaatggtagcggcagacttttaatctgacaggcgac  
 gggttcgaatccctccacttctacca  
 1-21tRNA-Asp(gtc)c[71357,71433]  
 ggttatgtagtttaactggtaaaatacctccctgtcacggaggatgatg  
 agggttcgaatcccttcgtaaccgcca  
 1-22tRNA-Tyr(gta)c[71440,71527]  
 gcgctgttatcccgtagatggaagcgggtggtgactgtaaatcactgtca  
 ttatgactcgggaggttcgactccttcacggcgacca  
 1-23tRNA-Asn(gtt)c[71597,71673]  
 ggtaggaagcacataaggcatgtcggtcggctgttaaccgaatggtac  
 agggttcgaatccctgactaaccgcca  
 1-24tRNA-Met(cat)c[71758,71834]  
 tgcgggtatagagaaagggtgtctcacatgtctcattagcatgttatcgg  
 taggttcgactcctacacccgcctcca  
 1-25tRNA-Glu(ttc)c[71922,71999]  
 attcccgtagacaaattaggtaaagtcaacacccttcaaggtgtggtt  
 gagggttcaagtccttcgggaatgcca  
 1-26tRNA-Pro(tgg)c[72006,72085]  
 ctccgttagctcagtttggttagcagcacttgcttgggagcaagggg  
 tcgaaggttcaaatcctcaacggagacca

>MF158043.1 Shigella phage Sf16, complete genome

1-1tRNA-Pro(tgg)[16042,16118]  
ctccatttagctcagcttggtagagcgttcggttggggcggtaaggccg  
aaggttcaagtccttcaatggagacca  
1-2tRNA-Glu(ttc)[16125,16202]  
attcccgtagacaaattaggtaaagtcaacacccttcaagggtgggtt  
gagggttcaagtccttcgggaatgccca  
1-3tRNA-Met(cat)[16290,16366]  
tgcgggtatagagaaagggtgtctcacatgtctcattagcatgtatcgg  
taggttcgactcctacacccgcctcca  
1-4tRNA-Asn(gtt)[16451,16527]  
ggttaggaagcacataaggcatgtcggctcggctgtaaccgaatgggtac  
agggttcgaatccctgactaaccgcca  
1-5tRNA-Asp(gtc)[16691,16767]  
ggttatgtagttaactgggtcaaaatacctccctgtcacggaggatgatg  
agggttcgaatcccttcgtaaccgcca  
1-6tRNA-Lys(ttt)[17218,17293]  
ggaagtgtagcagaatgggtgatgcggcagacttttaatctgacaggcgat  
gggttcgaatccctccacttctacca  
1-7tRNA-Met(cat)[17375,17451]  
ggttcagtcgcagataaggtaatgcaagggttcataagccctatgaatg  
tgggttcgattcccacctgaacctcca  
1-8tRNA-Ile(gat)[17454,17528]  
tgtgggttagcataaatggtaatgcaaacggctgataaccgttagaagag  
ggttcgataccctcacctacaacca  
1-9tRNA-Arg(tct)[17805,17880]  
gctccgtagtctaaaggataggcaactgtcttctaacagttcatatat  
agggttcgagtcctatacggagtgccca  
1-10tRNA-Ser(tga)[18500,18589]  
ggtaggtagcggctaataaggagccaaatagctctgaaaactattgccatt  
gtagagatacggtaggggttcgactcctttatctaccgcc  
1-11tRNA-Leu(tag)[18843,18919]  
gcacctatagcccaactggaagaggcagcagacttagaatctgctcagtg  
tgagttcgaatctctctaggtgtacca  
1-12tRNA-Lys(ctt)[18927,19002]  
gcagggttagcaaaatggttatgcggctgactcttaacagtaagacgat  
gggttcaattccctccacctgtacca  
1-13tRNA-Ala(tgc)[19009,19084]  
ggggatgtagtttacatgggttaaacataagtttgcaaacttaagtaca  
gggttcaattccctgcttccacca  
1-14tRNA-Gly(tcc)[19091,19165]  
gcatccatagtttaaacgggaaaattacagtcttccaaactgaggttgag  
gggttcgattccctctggatgtacca  
1-15tRNA-Thr(tgt)[19172,19247]  
gctcttatcgataattggctattacgggtgccttgtaagcaacttatca

ggggtcgaatccttgtgggagcacca  
 1-16tRNA-Val(tac)[19343,19417]  
 gctcgcttagtttatatggtaaagcccatccttacaagttggtgaagaa  
 ggttcaagtccttcagcgagtacca  
 1-17tRNA-Leu(caa)[19419,19496]  
 gttccagtatcccaattggcagaggatgcaagctcaaacctgtattagt  
 gacgggtcgaatccgtcttggaaacca  
 1-18tRNA-Arg(acg)[19675,19751]  
 gcagaattagttcaaatggacagagcagcaacctacgaagtgttagtta  
 ggggtcgaatcctctattctgcacca  
 1-19tRNA-Gln(ttg)[19760,19835]  
 aggggattagttacaaggttaaaacctcggtcttgaaatcgaagaaga  
 tggttcaattccatcatccccgcca  
 1-20tRNA-Leu(taa)[19838,19916]  
 gctccattactccaattggcagagaggccagattaaaatctgtgttatg  
 tatcggttcgaatccgatatggagtacca  
 1-21tRNA-Gln(ctg)[19923,19998]  
 agcagtatagcataactggcaatgccccagcctctgaagctgaaagatta  
 aggttcaaatccttatactgctgcca  
 1-22tRNA-His(gtg)[20030,20106]  
 gtggccttatcataaatggataatgacccatgctgtgaacatggctata  
 cgggttcgattcccgtaggtcacccca  
 1-23tRNA-Phe(gaa)[20114,20189]  
 agctcaattagcttatatggttaaagcgcgtgtctgaaaaacatgagaac  
 agggttcaaatcccgatgggctacca  
 1-24tRNA-Ser(gct)[20942,21034]  
 ggaagattaaccctaaaaggtaaggagcagtttgctaaactgccagtaa  
 ccgagaaatcggcgtaccagttcaagctcgtatcttctcca  
 1-25tRNA-Cys(gca)[21041,21116]  
 gtgtcgggtgcagaaatggttatgtgcctgtctgcaaacaggttatga  
 ggggtcgaagtccttccgatactcca

>MF158044.1 Shigella phage Sf18, complete genome

1-1tRNA-Pro(tgg)[66345,66424]  
 ctccgttagctcagtttggttagcagcacttgcttgggagcaagggg  
 tcgagggttcaaatccttcaacggagacca  
 1-2tRNA-Glu(ttc)[66431,66508]  
 attcccgtagacaaataggtaaagtcaacacccttcaaggtgtggtt  
 gagggttcaagtccttcgggaatgcca  
 1-3tRNA-Met(cat)[66596,66672]  
 tgcgggtatagagaaagggtgtctcacatgtctcattagcatgtatcgg  
 taggttcgactcctacacccgcctcca  
 1-4tRNA-Asn(gtt)[66757,66833]  
 ggttaggaagcacataaggcatgtcgggtcggctgtaaccgaatggtac  
 aggggtcgaatccctgactaaccgcca



1-5tRNA-Asp(gtc)[66997,67073]  
ggttatgtagtttaactgggtcaaaatacctccctgtcacggaggatgatg  
tgagttcgagtctcatcgtaaccgcca  
1-6tRNA-Lys(ttt)[67524,67599]  
ggaagtgtagcagaatggatgatgcggcagacttttaatctgacaggcgac  
gggttcgaatccctccacttctacca  
1-7tRNA-Met(cat)[67681,67757]  
ggttcagtcgcagataaggtaatgcaagggttcataagccctatgaatg  
tgggttcgattcccacctgaacctcca  
1-8tRNA-Ile(gat)[67760,67834]  
tgtgggttagcataaatggtaatgcaaacggctgataaccgttagaagag  
ggttcgataccctcacctacaacca  
1-9tRNA-Arg(tct)[68082,68158]  
gcacccttagttcaaacggatagagcaacggcttcttaaaccgtcagtta  
caggttcgaatcctgtaggggtgtgcca  
1-10tRNA-Ser(tga)[68420,68509]  
ggtaggtagcggctaataggaagccaaatagcttgaaaactattgccatt  
gtagagatacggtaggggttcgactcctttatctaccgcc  
1-11tRNA-Leu(tag)[68763,68839]  
gcacctatagcccaattggaagaggcagcagacttagaatctgctcagtg  
tgagttcgaatctctctaggtgtacca  
1-12tRNA-Lys(ctt)[68847,68922]  
gcaggtgtagcaaaatggttatgcggctgactcttaacagtaagacgat  
gggttcaattccctccacctgtacca  
1-13tRNA-Ala(tgc)[68929,69004]  
ggggatgtagttacatgggtaaaacataagtttgcaaacttaagtaca  
gggttcaattccctgcttctccacca  
1-14tRNA-Gly(tcc)[69011,69085]  
gcatccatagtttaaatgggaaaattacagtcttcaaactgaggttgag  
ggttcgattccctctggatgctcca  
1-15tRNA-Thr(tgt)[69092,69168]  
gctgcttcgtataattggctattgcacatccctgtaaggatggagatg  
caggttcgagtctgtgagcagacca  
1-16tRNA-Val(tac)[69264,69338]  
gctcgcttagtttatatggtaaagcccatccttacaagttggtgaagaa  
ggttcaagtccttcagcgagtacca  
1-17tRNA-Leu(caa)[69340,69417]  
gttcagtatcccaattggcagaggatgcaagctcaaacctgtattagt  
gacggttcgaatccgtcttggaacacca  
1-18tRNA-Arg(acg)[69596,69672]  
gcagaattagttcaaatggatagagcagcaacctacgaagttgttagtta  
ggggttcgaatcctctattctgcacca  
1-19tRNA-Gln(ttg)[69917,69992]  
aggggattagttacaaggttaaaacctcggtcttgaaatcgaagaaga

tggttcaattccatcatccccgcca  
1-20tRNA-Leu(taa)[69995,70073]  
gtccattactccaattggcagagaggccagattaaaatctgtgtatg  
tatcggttcgaatccgatatggagtacca  
1-21tRNA-Gln(ctg)[70080,70155]  
agcagtatagcataactggcaatgctccagcctctgaagctgaaagatta  
aggttcaaatccttatactgctgcca  
1-22tRNA-His(gtg)[70187,70263]  
gtggccttatcataaatggataatgacccatgctgtgaacatggctata  
cgggttcgattcccgtaggtcaccca  
1-23tRNA-Phe(gaa)[70271,70346]  
agctcaattagcttatatggttaaagcgcgtgtctgaaaacatgagaac  
agggttcaaatcccgatgggctacca  
1-24tRNA-Ser(gct)[71099,71191]  
ggaagattaaccctaaaaggtaaggagcagtttgctaaactgccagtaa  
ccgagaaatcggcgtaccagttcaagtctggatcttctcca  
1-25tRNA-Cys(gca)[71198,71273]  
gtgtcgggtgcagaaatggttatgtgcctgtctgaaaacaggttatga  
gggttcgagtccttccgatactcca

>MF158046.1 Shigella phage Sf23, complete genome

1-1tRNA-Arg(tct)c[158397,158472]  
cgaggcatagctcagaaggaagagcaaggaccttctaagtcctaggtcgt  
aggttcgatccctactgcctcgacca  
1-2tRNA-Asn(gtt)c[158477,158551]  
ggatgtgtagctcaatggcagagcgatcgctgttaagcgattggttata  
ggttcgaatcctatcacgtccgcca  
1-3tRNA-Tyr(gta)c[158556,158642]  
ggggagtatcccgtagaggtagcgggtggactgtaaatccattgtcat  
tgcgactcgggtggttcgactccatcactccccacca  
1-4tRNA-Met(cat)c[158655,158729]  
ggccctgtagctggaaggttcaagcaagcgactcataatcgccagatggt  
ggttcaattccaccagggccacca  
1-5tRNA-Thr(tgt)c[158731,158806]  
gctgatttagctcagtaggtagagcaactcacttgtaatgagaaggtcgg  
cgggtcgattccgtcaatcagacca  
1-6tRNA-Ser(tga)c[158812,158901]  
ggaggcgtggcagagtgtttaatgcaccggtcttgaaaaccggcagtcg  
ctccggcgactcataggttcaaatcctatcgctccgcca  
1-7tRNA-Pro(tgg)c[158903,158977]  
ctccgtgtagctcagtttggtagagcgctgattgggatcaggaggtcc  
aaggttcaaatccttgatggagac  
1-8tRNA-Gly(tcc)c[158988,159061]  
gcggatatcgataatggtattacctcagactccaatctgatgatgtga  
gttcgattctcattatccgtcca

1-9tRNA-Leu(taa)c[159067,159153]  
gcgagaatggtaaattggtaaaggcacagcacttaaaatgctgcggaat  
gatttccttgtgggttcgagtccttctcgcacca  
1-10tRNA-Gln(ttg)c[159154,159227]  
tgggaattagccaagttggtaaggcactggattttgattccaggatgcaa  
agggtcagtcctttattcccagc

>MF398190.1 Staphylococcus phage vB\_SauM-fRuSau02, complete genome

1-1tRNA-Met(cat)c[14750,14821]  
ggactcttagctaaaggtaaagccaaccgctcataacggttgactgta  
ggttcgaatcctgcagagtcca  
1-2tRNA-Trp(cca)c[37968,38039]  
acacccttagtataattagtagtacaagggtctccaaaacccttagtctt  
tgtgcaaatcaaagagggtgtg  
1-3tRNA-Phe(gaa)c[38046,38118]  
ggtttcttagctcagatggtagagcactagattgaagctctaggtgtcat  
tggttcaaatccaatagaaacca  
1-4tRNA-Asp(gtc)c[38124,38199]  
tggctcattggtgtaactggtaacacactgccctgtcacggcagagagt  
acgagttcagtcctctatgggtcgt

>MF479730.1 Aeromonas phage AS-gz, complete genome

1-1tRNA-Arg(tct)c[140918,140994]  
ggtctcttagctcagttggatagagcagcggccttctaagccgcggtca  
ttggtcaaatccaatagggactgcca  
1-2tRNA-Met(cat)c[141563,141637]  
ggccctgtagctagacggttaagcaggcggctcataaccgctcgtagta  
ggttcgattcctaccagggtcacca  
1-3tRNA-Met(cat)c[141840,141916]  
tgcgatgtagaggagaggtcgtcctcgtcgggctcatatcccgaataca  
gcggttcgaatccgctcatcgttcca  
1-4tRNA-Asp(gtc)c[141929,142002]  
ggagccatagtttatttggttaaaatagtcctcgtcacgggacagcacc  
gagttcgatcctcgggtggctccgc  
1-5tRNA-Ile(gat)c[142127,142202]  
agtggattagctcagtaggtagagcactcgaccgataatcgagagcgc  
tgggtcgatcccaataatccactacca  
1-6tRNA-Trp(cca)c[142205,142280]  
atgacattggtgttagcggtagcatgccggtctccaaaaccgtgcggcca  
gggttcgaatccttgatgtcatgcca  
1-7tRNA-Thr(tgt)c[142645,142720]  
gccggttagctcatctggtagagcacagccttgaacgctggggtggt  
ccgttcgagtcggacaatcggcacca  
1-8tRNA-Pro(tgg)c[143356,143430]  
ctcagcgtaggcaagtggatgtcgttccgttgggacggaatttcggg  
tgttcgattcaccgctgagacca

1-9tRNA-Gly(tcc)c[143676,143751]  
 gcgggtaaggtgttatggatacatgctagcctccaagcttgagtagac  
 cggttcgataccggctacccgctcca  
 1-10tRNA-His(gtg)c[143764,143838]  
 gtgaccttagtagtaatggtagctatcctggatgtgaccagggagtacg  
 gggtcgaaccccgtaggtcacccca  
 1-11tRNA-Lys(ttt)c[144128,144203]  
 gcatctctaactcaattggtagagtagcggacctttaatccgtcaagtct  
 gagttcgagtctcaggggatgcacca  
 1-12tRNA-Tyr(gta)c[144761,144843]  
 ggaacgttcgggtaatggatcccaagcggctgaacccgctcgcctctg  
 gcattcttggttcgagtcgaaggcgtccacca  
 1-13tRNA-Asn(gtt)c[144857,144939]  
 ggtgatgtagcataacggcatgcggccggctgtaaccggtgaggaaac  
 tctacgttggttcgactccaaccatcaccccca  
 1-14tRNA-Ser(tga)c[145108,145201]  
 ggaagattggcccgagttggtttaaggcaccggtcttgaacccgcgcat  
 cgtaggaatacgggtccatccgttcgaatcgatattctcctcca  
 1-15tRNA-Leu(taa)c[145393,145477]  
 gcaagtatgggtgaattggtatacactggaggcttaaacctcccgcctt  
 cgggattgtgggttcgagtcctactactgcacca

>MF668280.1 Mycobacterium phage Phabba, complete genome

1-1tRNA-Ser(gct)[31867,31949]  
 ggagggtgagtatcaggtgatacagcgagattgctaataccgtacggctc  
 ataccgtgaggttcaagtctctcctccctccgc  
 1-2tRNA-Leu(cag)[32069,32152]  
 gcctgggtggcggaatggcagacgcgcagattcagaatctggtgtcctt  
 cggggcgtgagggttcaagtcctctccaggtac  
 1-3tRNA-Leu(gag)[32157,32230]  
 gctcgggtagcccaaaggcagaggcagcacgttgaggacgtgtccagtg  
 gggttcgactcccgtccgagtac  
 1-4tRNA-Leu(caa)[32273,32357]  
 ggggtgaatggcgaaattggtagacgcgctggcctcaaaagccggtgcccg  
 caagggcgtgtgggttcgagtccttcatctac  
 1-5tRNA-Pyl(cta)[32921,32991]  
 gcggtatcgctacggcacgcaggtgacttctaaactcaccgtttccggg  
 ttcgagtcgccgataaccgcgc  
 1-6tRNA-Pro(tgg)[90881,90953]  
 cgggatatggtgtaagggttagcacgattggttgggaccattctgacgg  
 gggttcgagtcctgtttcccgac  
 1-7tRNA-Trp(cca)[90992,91064]  
 ggggacttcgccaagtgggacggcagcggcttcaaaccgcatgagggg  
 agttcgattcttcagtcctcgc  
 1-8tRNA-Tyr(gta)[91068,91152]

gccgtgtatgcccaactgggtgttgggagctggctgtaaccagtggcct  
tcgggacggcggagttcgattctctgacgcggcac  
1-9tRNA-Met(cat)[91296,91370]  
agcggggtagagcagttcggcagctcgctagcctcataagctagaggtcg  
gaggttcaaactcctctcccggcac  
1-10tRNA-Cys(gca)[91569,91641]  
gcgtctatggcgaaatggtaacgcgctggattgcaaccccagttcctc  
cgttcgattcggagtaggcgctc  
1-11tRNA-Glu(ctc)[91700,91771]  
gtgccaatggggtagtggttaacctcctgattctcagtcaggcatccga  
gttcgatcctcggttggactgc  
1-12tRNA-His(gt)[91773,91845]  
gtggccatagttcaatggcagaacgccgggtgtgatccggtcgcgagg  
gttcgattccctctggtcacccc  
1-13tRNA-Gly(tcc)[91846,91917]  
gcgtctatgggtagcggtaacacatcagcttccaaactgagttcggc  
gttcgatcccgctagacgctc  
1-14tRNA-Ala(ggc)[92072,92145]  
ggggctgtagctcaatcggtagagcgtctcgctggcagtgagaaggcagt  
cggttcgatcccgaccagttccac  
1-15tRNA-Phe(gaa)[92207,92279]  
gccatttagctcatgtgtagagcgtcggattgaaatcccgaggagct  
ggttcgactccagaatgggcac  
1-16tRNA-Val(cac)[92353,92424]  
gcccattagttcaatgggagaacaaccggttcacatccggtagtcagag  
gttcgattcctctattgggtac  
1-17tRNA-Lys(ctt)[92436,92507]  
ggcctttagctgaggggattagcacctgactcttaacaggggaccttg  
gttcgattccaagtagggccac  
1-18tRNA-Gly(gcc)[92582,92653]  
gtgctattagtgaatggcatcacacgactttgccaaggctgtagcgcg  
gttcgattcccgcatagcactc  
1-19tRNA-Asp(gtc)[92725,92801]  
ggcctgtagcttagtttggccaaaagcgctgcctgtcgcagcaggagaa  
cacgggttcaaactccgttagggtcgc  
1-20tRNA-Met(cat)[93169,93242]  
gcctgttagctcatctggcagagcgccctgctcataacggggaggtaag  
tggttcgagaccactcataggtac  
1-21tRNA-Ile(gat)[93269,93343]  
gcctgttagcggactggctcgtccgatccaagctgataactggcgcaagc  
agtgttcgattcactgagcaggtac  
1-22tRNA-Ser(tga)[93390,93462]  
tcggggtagctcagttggtagagcgccacccttgatcggtggaggtcgt  
cggttcgagtccgatccctttcc

1-23tRNA-Arg(acg)[93491,93564]  
 ctcccgtagctcagcggacagagtgtgactacgaatcaagaagccgg  
 aggttcgattcctcctcgggagac  
 1-24tRNA-Thr(ggt)[93687,93758]  
 gctggattagcatagtggtagtgcccatccttggtatggatgtgccggg  
 gttcgattccccgattcagctc  
 1-25tRNA-Val(gac)[93764,93836]  
 gctctttagctcagtggtagagcacctgcccacatgcaggtgtccga  
 ggttcgattcctcgttagagcac  
 1-26tRNA-Glu(ttc)[93980,94054]  
 ggtccgttcggctagtgcccaagccccctgcctttcaagcaggatgaca  
 ccggttcaaaccggtacggactac  
 1-27tRNA-Thr(tgt)[94171,94242]  
 gcctccatcgttcagtggtaggacgccacctgtaagtcggctgcgggc  
 gttcgattcgtcctggaggctc  
 1-28tRNA-Arg(cct)[94490,94563]  
 accgctgtagctcagtgagacagcaggacctcctacgtcccgtgccgg  
 ggggttcgattcctcccagcggtgc  
 1-29tRNA-Gln(ttg)[94594,94667]  
 tgcggagcggctctgttgccaggccagtgggccttgacccccacgtccgt  
 aggttcgattcctgcctccgcagc  
 1-31tRNA-Lys(ttt)[95471,95546]  
 ggggcggtagctagcccgtcaagactctcgacttttaatcgagatgcc  
 gtgggttcaaatacccaccccccac  
 1-32tRNA-Gln(ctg)[122516,122587]  
 tgctgttggtgtaattggcaacacgcaagttctgacactgtattcttg  
 gttcgagtcaggcgggcaggcagc  
 1-33tRNA-Asn(gtt)[122607,122679]  
 tggctgtagttcaatggcagaacgctcgcctgttaagcgagtagttgtt  
 ggttcgagtcagccaggccagc  
 >DQ004855.1 Listeria bacteriophage P100, complete genome  
 1-1tRNA-Met(cat)c[123712,123785]  
 ttgtcccgtagctagaaggtcgagcaaggagctcataactcctcggtttg  
 ggttcgattcccaacggggcaatc  
 1-2tRNA-Pro(tgg)c[124678,124752]  
 cagggtgtagctcagtttggttagagtacccgcttggagacgggaagtc  
 gtaggttcgaatcctaccacctga  
 1-3tRNA-Arg(tct)c[125870,125940]  
 gtcttatggtgtagcggatgcacaagggttctactcccttagcgcgg  
 gttcgaatcctgctgaggact  
 1-4tRNA-Gly(tcc)c[126187,126257]  
 gcgggtatagtataagggtagtagcccaaggtttccaacctgtagtgggg  
 gttcgaatccccctaccgct  
 1-5tRNA-Asn(gtt)c[126326,126399]

gtgtccttaactcagaggtcagagtgccgtcctgttaagtcggaagtcgc  
 tggttcaatccagcaggatacgc  
 1-6tRNA-Ser(tga)c[127020,127111]  
 ggaaggttggtagagcttgtaatacgtagcttgaaaactagttgcc  
 ctggaatacaggtacaagggttcaatcccttaccttct  
 1-7tRNA-Phe(gaa)c[127124,127195]  
 gtagtcctagctgagatggattagcgttgcttgaaaagcaggagaggca  
 ggttcgatacctgcggactcca  
 1-8tRNA-Lys(ttt)c[127201,127272]  
 ggagttatggtgaaatggctatcactgcgggttttaccctgtattcta  
 ggttcgaatcctagtggtcca  
 1-9tRNA-Trp(cca)c[127397,127470]  
 taggggtatagtttatctggtaaaatattggtttccaactccaatgaggt  
 gggttcaagtcctactatccctgt  
 1-10tRNA-Gln(ttg)c[127472,127544]  
 tggctctagccaagcggtaaggcaacggatttgattccgtgatacgtt  
 ggttcgaatccaactagaccagc  
 1-11tRNA-Thr(tgt)c[127563,127634]  
 gcttgatagttcaattggtagaacagtggtttgtaagcctcagacgtg  
 ggttcaagtcctactacaagca  
 1-12tRNA-Tyr(gta)c[127717,127798]  
 gtgccattcgcatagaggcaattgcaggggactgtaactcccctcccttc  
 ggggtccaaggttcgagtccttgatggcgca  
 1-13tRNA-Leu(tag)c[128159,128243]  
 tgccgagatggtggaactggtatacaggtagacttagaatctgctgtcc  
 caaggatatgtgggttcgaatcccactctcggtat  
 1-14tRNA-Asp(gtc)c[128709,128781]  
 gtgcgtatgatataatggctattatactcgactgtctatcgagaaatagg  
 ggttcgattccccttacgtgcgc  
 1-15tRNA-Ile(gat)c[128885,128957]  
 accagcatagcttaggaggcaaagcaaccgaccgataatcggtagtcctt  
 ggttcaattccaagtgttggtac  
 1-16tRNA-Ser(gct)c[129134,129220]  
 ggagagttgtcagagaggcttaatgatacgggttgctaactcgtgtact  
 agtaatagtagcaagggttcgaatcccttactctcct  
 1-17tRNA-Cys(gca)c[129302,129372]  
 gcgggtataaccaactggaaggtagtagactgcaaatctacgtatatgg  
 gttcaattccattaccgct

>KX369583.1 Mycobacterium phage Littleton, complete genome

1-1tRNA-Ser(gct)[30420,30503]  
 ggagggtgagcatcaggtgatgcagcgagattgctaataccgtacggtaa  
 ccaccccgtgaggttcgaatcctcctccctccgc  
 1-2tRNA-Leu(cag)[30696,30771]  
 gctcccgtagcccaattggcaggaggcaccagattcaggatctgggcagt

gtgagttcgaatctcaccgggagtac  
1-3tRNA-Leu(gag)[30891,30965]  
gtctctgtaggcaaatcgaaaagcccatcttgaggggtggtgcgtg  
cgggttcgactcccgcagagacac  
1-4tRNA-Leu(caa)[30966,31039]  
gccgtggtaggcatctggcgagccgccgagttcaagtttcggtgttgc  
gggttcgaatcccgcacggtac  
1-5tRNA-SeC(tca)[67826,67922]  
attctggcactggtggcgagcccaccggcgagcttcaagctgtcgt  
ggccggagaaccgacggaaacatccgttcaacgcgacccagggcc  
1-6tRNA-Pro(tgg)[91780,91852]  
cggggtgtagttcagtggaagagcgcttggttgggaccaagatgtcgca  
ggttcgaatcctgtcaccgac  
1-7tRNA-Trp(cca)[91869,91944]  
tggggtgaagccgatctggaaggcagcggtctcaaagccgtctatagc  
gggttcgaatcccgtaaccctgccca  
1-8tRNA-Tyr(gta)[91946,92032]  
gccgcacatcccgaactggtgttgggagcaggtgtaaccctgtggcct  
tcgggacggtgaggttcgattcctcagtcggtacca  
1-9tRNA-Pyl(cta)[93141,93213]  
gcaccatttgctcaatggcagagcggcggttctaaccggtgagtgccg  
gttcgattccggcatggtgcacc  
1-10tRNA-Met(cat)[93363,93437]  
agcgggtgtagagcagctaggtagctcgccgggctcataaccggaggacg  
cgtgttcgaatcacgccaccgccac  
1-11tRNA-Cys(gca)[93564,93635]  
gcgccttggcggaatggctacgtgctcggtgcaaccgagttatcccg  
gttcgactccgggagggcgctc  
1-12tRNA-Glu(ctc)[93703,93774]  
gtcccatgggtagtggttaaccctcctggttctcagccagcgctccga  
gttcgatcctcggtgggagtc  
1-13tRNA-His(gtg)[93776,93849]  
gtggccgtagttcagccggtagaacgctgggttgatccagtcgtcga  
gggttcgagtcctccggtcaccc  
1-14tRNA-Ala(tgc)[94011,94085]  
gggcctgtagctccaattggtagagcagcatcctgcaagatgacggctg  
tcggttcgaatccgacctggtccac  
1-15tRNA-Phe(gaa)[94275,94347]  
gccgtcatagctcagttggtagagcactggcctgaaaaccagtgggcga  
ggttcgagtcctcgtgtcggcac  
1-16tRNA-Val(cac)[94353,94426]  
gtccgttagctcagctggaagagcgctcgggtccacccgagaggccgc  
aggttcgatccctgcaatggacac  
1-17tRNA-Lys(ctt)[94545,94617]



gccttcgtagctcagtggttagagctgtcgcctttaagcgataggtcgtt  
ggttcgaatccagccgggggcac  
1-18tRNA-Glu(ttc)[94622,94698]  
ggtcgggtcgggtctgctggatggccagtcggattttcactccggacatt  
cgcgggttcaattcccgtcccgatcgc  
1-19tRNA-Gly(tcc)[94778,94850]  
gcgggtgtggccgaatggctcaggcaccagattccactctggctacgca  
ggttcgattcctgtcatccgctc  
1-20tRNA-Thr(cgt)[94910,94984]  
gtctgttagctcacctggcagagcgtcggcgtcgtatcccgaagcattc  
cggttcgagtcggacagcagcccc  
1-21tRNA-Thr(tgt)[94985,95057]  
gcctctgtgtccagcggcacggacatccgccttgaagcggaggacccc  
cgttcgatccgggtagaggctc  
1-22tRNA-Thr(ggt)[95465,95537]  
gtcgggttagctcagtggttagagcgttcctctggatgggaaaggccggg  
ggttcaatccccgattcagctc  
1-23tRNA-Gly(gcc)[96860,96933]  
gcgaaggtagctcagctggcagagcggcaccttgccaaggtggaggtcgc  
gggatcgtaacccgttcttcgctc  
1-24tRNA-Asp(gtc)[96937,97009]  
ggccctgtagctcagaggaagagcggcgtctgtcgaatcgaggtcgcg  
gtatcgtaatccgtcagggtcgc  
1-25tRNA-Met(cat)[97069,97141]  
gcctcactagctcattggttagagccgctcgtcataacgtgcaggtacct  
ggttcgattccagggtaggtac  
1-26tRNA-Ile(gat)[97147,97221]  
gcctgttagcggactggctcgtccgatccaagctgataacttggcgtgaagc  
ggtgttcgattaccgagcaggtac  
1-27tRNA-Arg(acg)[97315,97387]  
gcctctatggtccaacggatatgacccggtctacggaaccggagatgcg  
tgttcgattcgcgctaggggcac  
1-28tRNA-Val(gac)[97430,97502]  
gtccgtgtagctcaggggtagagcgcctgctcgacacgcaggaggaccga  
ggttcgaaacctcgcatggacac  
1-29tRNA-Arg(cct)[97676,97749]  
gcctctgtagctcaacggacagagcaacgcggtcctaacgcggtggctgg  
aggttcgaatcctctcggaggcac  
1-31tRNA-Gln(ttg)[98290,98365]  
tggggtatggtggcaatctggcagtcgcccggaacttgactccggaggt  
gcaggttcgagtcctgctaccccatc  
1-32tRNA-Arg(tct)[98369,98442]  
gccctgttagctcagtggaagagcggcgagcttctacctcggggccgg  
gagttcgaatctctccaggggcac

1-33tRNA-Lys(ttt)[98510,98586]  
gggccggtatcttagtctggtcaaagaagtggactttaatccgcgcgcc  
gtgggttcgaatcccacccggcccacc  
1-34tRNA-Gln(ctg)[126425,126499]  
tgctcgttggtgtaactggcaacactacggactctgactccgtcattta  
ggttcgaatcctaagcgagcagcca  
1-35tRNA-Asn(gtt)[126506,126581]  
tggggtgtccgttaatcaggcaaacgagcggactgtaatccgcccctgc  
aggttcgaatcctgccaccccagcca

>AP011616.1 Thermus phage phiYS40 DNA, complete genome

1-1tRNA-Thr(tgt)[52068,52143]  
ggcctcgtagctcaacaggaagagcactcgccttgaagcgggggtgt  
gggttcaaatcccaccgggcctcca  
1-2tRNA-Met(cat)c[120023,120099]  
ggggcgtagctcaagcgtgagagcgtcggtcctaaccgattggtg  
taggttcgagtcctacacgccccacca  
1-3tRNA-Arg(tct)c[120112,120188]  
gaggggttagctcaacaggacagagcaagggttctaatccctagggtg  
caggttcaagtctgcacccctcgcca

>AB609718.1 Enterococcus phage phiEF24C-P2 DNA, complete genome

1-1tRNA-Met(cat)c[136981,137054]  
ggacgttagctcagttggtcagagcattcggtcctaaccgaacggtcg  
caggttcgagacctgcaatgtcca  
1-2tRNA-Leu(tag)c[137677,137761]  
gcagaagtgatggaactggtagacaacggtgtcttagaaacatcggtctg  
taatggacgtgtgggttcgactcccgcttctgca  
1-4tRNA-Arg(tct)c[138482,138557]  
ttaggttagctcaataggatggagcatccgccttctaagcggacggtt  
gggggttcgattccctccatctacgt  
1-5tRNA-Trp(cca)c[139156,139229]  
tagtcggttagtgaactggaacacgttggtctccaaaccaataatag  
gggttcaatcctctaccgattgt  
1-6tRNA-Asp(gtc)c[139479,139554]  
tggcagtataggcagaggtgtccaacacgtgtcagcgtggaacaca  
cgggttcgagtcctgtactgtcgtc

>KM607001.1 Enterobacteria phage RB33, complete genome

1-1tRNA-Arg(tct)c[67601,67677]  
cggggcatagctcaattgtatagagaacggacttctaaccgtaggttg  
aaggttagaatccttctgtctcgacca  
1-2tRNA-Met(cat)c[68388,68459]  
ggccctgtagctggaaggttcaagcaagcgactcataatcgccagatggt  
ggttcaattccaccaggcca  
1-3tRNA-Thr(tgt)c[68461,68536]  
gctgatttagctcagtaggtagagaactcactgtaatgagaaggtcgg

cggttcgattccgtcaatcagcacca  
 1-4tRNA-Ser(tga)c[68538,68626]  
 tggaggcgtggcagagtggtttaatgcaccggtcttgaaccggcagtc  
 gctccggcgactcataggtcaaactctatcgctccgt  
 1-5tRNA-Pro(tgg)c[68627,68701]  
 ctccgtgtagctcagtttgtagagcgctgattgggatcaggagggtcc  
 aaggttcaaatcctgtatggagac  
 1-6tRNA-Gly(tcc)c[68712,68785]  
 gcggatatcgataatggcattacctcagactccaatctgatgatgtga  
 gttcgattctcattatccgtcca  
 1-7tRNA-Leu(taa)c[68791,68877]  
 gcgagaatggtaaattggtaaaggcacagcacttaaatgctgcggaat  
 gatttccttgggttcgagtccttctcgcacca  
 1-8tRNA-Gln(ttg)c[68878,68951]  
 tgggaattagccaagttgtaaggcatagcacttgactgctagatcaa  
 aggttcgagtcctttattcccagc

>GQ303262.1 Mycobacterium phage LRRHood, complete genome

1-1tRNA-Ser(gct)[30760,30843]  
 ggagggtgagcatcaggtgatgcagcgagattgctaataccgtacggtaa  
 ccaccccgtaggttcgaatcctcctccctccgc  
 1-2tRNA-Leu(cag)[31036,31111]  
 gctcccgtagccaattggcaggaggcaccagattcaggatctgggcagt  
 gtgagttcgaatctcaccgggagtac  
 1-3tRNA-Leu(gag)[31231,31305]  
 gtctctgtaggcaaatcgaaaagccgcatcttgagggggtggtgcgtg  
 cgggttcgactcccgcagagacac  
 1-4tRNA-Leu(caa)[31306,31379]  
 gccgtggtaggccatctggcgagccgagttcaagtttcggtgtttgc  
 gggttcgaatcccggccacgtac  
 1-5tRNA-SeC(tca)[67722,67818]  
 attctggcactggtggcgagcccaccggcgagcttcaagctgtcgt  
 ggccggagaatcgaccggaacatcccggtcaacgcgacccagggcc  
 1-6tRNA-Pro(tgg)[91484,91558]  
 cggggtgtagttcagtttggaagagcgcttggttgggaccaagatgtcg  
 caggttcgaatcctgtcaccggac  
 1-7tRNA-Trp(cca)[91573,91643]  
 gggctctgtgcacagggtgcccagcgtctcaaagccgaaggcgggggtt  
 cgattccctcaggcctgcca  
 1-8tRNA-Tyr(gta)[91645,91731]  
 cccgtacatgcccaactggtgttgggagcaggctgaaccctgtggcct  
 tcgggacggtgaggttcgattcctcagtcgggacca  
 1-9tRNA-Pyl(cta)[92845,92917]  
 gcaccatttgctcaatggcagagcggcggttctaaaaccgtgagtgccg  
 gttcgactccggcatggtgcacc

1-10tRNA-Met(cat)[93067,93141]  
agcgggttagagcagctaggtagctcgccgggctcataaaccggaggacg  
cgtgttcgaatcacgccaccgccac  
1-11tRNA-Cys(gca)[93268,93339]  
gcgccttggcggaatggctacgtgctcggtgcaacccgagttatcccg  
gttcgactccgggaggcgctc  
1-12tRNA-Glu(ctc)[93344,93418]  
ggtcggttgagtagatggatatctgccaccctctcaagtgagatca  
cgggttcaagtcccgtacggactgc  
1-13tRNA-His(gtg)[93420,93493]  
gtggccgtagttcagccggtagaacgctgggttgtgatccagtcgtcga  
gggttcgagtcctccggtcaccc  
1-14tRNA-Ala(tgc)[93655,93729]  
gggccttagctccaattggtagagcagcatccttgaagatgacggctg  
tcggttcgaatccgacctggtccac  
1-15tRNA-Phe(gaa)[93919,93991]  
gccgtcatagctcagttggtagagcactggcctgaaaaccagtggccga  
ggttcgattcctcgtgtcggcac  
1-16tRNA-Val(cac)[93997,94070]  
gtccgttagctcagctggaagagcgctcgggtccacaccgagaggccgc  
aggttcgatccctgcaatggacac  
1-17tRNA-Lys(ctt)[94190,94263]  
gccttcgtagctcagttggtagagctctcgctcttaagcgagatgtcgc  
aggttcgacccctgccggaggcac  
1-18tRNA-Glu(ttc)[94268,94344]  
ggtcgggtcggtctgctggatggccagtcggatttctactccgacatt  
cgcgggttcaattcccgtcccgatcgc  
1-19tRNA-Gly(tcc)[94424,94496]  
gcgggtgtggccgaatggctcaggcaccagatttccactctggctacgca  
ggttcgattcctgtcatccgctc  
1-20tRNA-Thr(cgt)[94556,94630]  
gctgctgtagctcacctggcagagcgtcggcgtcgtatcccgaaggcatc  
cgggttcgagtcggacagcagcccc  
1-21tRNA-Thr(tgt)[94631,94703]  
gcctctgtggccagcggcacggacatccgccttgaagcggaggacccc  
cgttcgatccgggtagaggctc  
1-22tRNA-Thr(ggt)[94763,94835]  
gctgggttagctcagtggtagagcgttcctctggtatgggaaaggcccg  
ggttcaatccccgactcagctc  
1-23tRNA-Gly(gcc)[96158,96231]  
gcgaaggtagctcagctggcagagcggccaccttgccaagtgagggtcgc  
gggatcgtaacccgttcttcgctc  
1-24tRNA-Asp(gtc)[96235,96307]  
ggccctgtagctcagaggaagagcgcgggtctgtcgaatcgagggtcgcg

gtatcgtaatccgtcagggtcgc  
 1-25tRNA-Met(cat)[96367,96439]  
 gcctcactagctcattggtagagccgctcgctcataacgtgcaggtacct  
 ggttcgattccagggtgaggtac  
 1-26tRNA-Ile(gat)[96445,96519]  
 gcctgttagcggactggtcgtccgatccaagctgataactggcgtaagc  
 ggtgttcgattcaccgagcaggtac  
 1-27tRNA-Arg(acg)[96613,96685]  
 gcctctatggtccaacggatatgacgccggtctacggaaccggagatgcg  
 tgttcgattcgcgctaggggcac  
 1-28tRNA-Val(gac)[96728,96800]  
 gtccgttagctcagtggtagagcgcctgctcgacacgcaggaggaccga  
 ggttcgaaacctcgcatggacac  
 1-29tRNA-Arg(cct)[96974,97047]  
 gcctctgtagctcaacggacagagcaacgcggtcctaacgcggtggctgg  
 aggttcgaatcctctcggaggcac  
 1-31tRNA-Gln(ttg)[97588,97663]  
 tggggatgggtggcaatctggcagtcgcccggaatttgactccggaggt  
 gcaggttcgagtcctgctaccccatc  
 1-32tRNA-Arg(tct)[97667,97742]  
 gccctttagctcagtggaacagagcggcgagcttctacctcgccggccgg  
 gattcgaatcctcaggggcacca  
 1-33tRNA-Gln(ctg)[124635,124709]  
 tgctcgttggtgtaactggcaacactacggactctgactccgtcattta  
 ggttcgaatcctaagcgagcagcca  
 1-34tRNA-Asn(gtt)[124716,124791]  
 tgggggtgccgttaatcaggcaaacgagcggactgttaatccgccctgc  
 aggttcgaatcctgccaccccagcca  
 >KT365400.1 Mycobacterium phage ErnieJ, complete genome  
 1-1tRNA-Ser(gct)[29948,30031]  
 ggagggtgagcatctggtgatgcagggtcctgctaaggccctacggatt  
 cacaccctgagtttcgattactcctccctccgc  
 1-2tRNA-Leu(cag)[30128,30204]  
 gccctgctgagcaaacctggcaaagctgccgcattcagagtcgggtcatt  
 tccgggttcgactcccgaggcaggtac  
 1-3tRNA-Leu(gag)[30324,30398]  
 gtctctgtaggcaaatcgaaaagccgcatcttgaggggtggtgcgtg  
 cgggttcgactcccgcagagacac  
 1-4tRNA-Leu(caa)[30399,30472]  
 gccgtggtaggccatctggcgagccgagttcaagtttcggtgtttgc  
 ggttcgaatcccgccacggtac  
 1-5tRNA-Pro(tgg)[90472,90546]  
 cgggggtagttcagtttggaagagcgttggtttgggaccaagttgtcg  
 caggttcgaatcctgtcaccccgac

1-6tRNA-Trp(cca)[90561,90631]  
gggtctgtgcacagggtgcccgcagggtctccaaagccgaaggcgggggtt  
cgattccctccaggcctgcc  
1-7tRNA-Pyl(cta)[91768,91841]  
tgcgagatcgtgcacggcgactaggagcttctaaccctccgactcgcgg  
gttcgactcccgcatctcgacccc  
1-8tRNA-Met(cat)[91989,92063]  
agcgggtgtagagcagctaggtagctcgccgggctcatgacccggaggacg  
cgtgttcgattcacgccaccgccac  
1-9tRNA-Cys(gca)[92190,92261]  
gcgcctttggcgggaatggctacgtgctcggtgcaacccgagttatcccg  
gttcgactccgggaggcgctc  
1-10tRNA-Glu(ctc)[92266,92340]  
ggtccgttggagtagatggacatctcgccaccctctcaaggaggagatca  
cgggttcaagtcccgtagcgactgc  
1-11tRNA-His(gtg)[92342,92415]  
gtggccgtagttcagccggtagaacgctgggtgtgatccagtcgtcga  
gggttcgagtcctccggtcaccc  
1-12tRNA-Ala(tgc)[92577,92651]  
gggcctgtagctccaattggtagagcagcatcctgcaagatgacggctg  
tcggttcgaatccgacctggtccac  
1-13tRNA-Phe(gaa)[92841,92913]  
gccgcatagctcagttggtagagcactggcctgaaaacccagtggccga  
ggttcgattcctcgtgtcggcac  
1-14tRNA-Val(cac)[92919,92992]  
gtccgttagctcagctggaagagcgctcggtccacacccgagaggccgc  
aggttcgatccctgcaatggacac  
1-15tRNA-Lys(ctt)[93111,93183]  
gccttcgtagctcagtggtagagctgtgcctcttaagcgataggtcgtt  
ggttcgaatccagccgggggcac  
1-16tRNA-Glu(ttc)[93188,93264]  
ggtcgggtcggtctgctggtatggccagtcggattttcactccggacatt  
cgcgggtcaattcccgtccgatcgc  
1-17tRNA-Gly(tcc)[93344,93416]  
gcgggtgtggccgaatggctcaggcaccagatttcactctggctacgca  
ggttcgattcctgtcatccgctc  
1-18tRNA-Thr(cgt)[93476,93550]  
gctgctgtagctcacctggcagagcgtcggcgtcgtatcccgaaggcatc  
cgggttcgagtcggacagcagcccc  
1-19tRNA-Thr(tgt)[93551,93623]  
gcctctgtggtccagcggcacggacatccgccttgaagcggaggacccc  
cgttcgatccgggtagaggctc  
1-20tRNA-Thr(ggt)[94031,94103]  
gctgggttagctcagtggtagagcgttcctctggtatgggaaaggcccg

ggttcaatccccgactcagctc  
 1-21tRNA-Gly(gcc)[95426,95499]  
 gcgaaggtagctcagctggcagagcgccaccttgccaagtgagggtcgc  
 gggatcgtaacccgttcttcgctc  
 1-22tRNA-Asp(gtc)[95503,95575]  
 ggccctgtagctcagaggaagagcgccggtctgtcgaatcgagggtcgcg  
 gtatcgtaatccgtcagggtcgc  
 1-23tRNA-Met(cat)[95635,95707]  
 gcctcactagctcattggtagagccgctcgtcataacgtgcaggtacct  
 ggttcgattccagggtaggtac  
 1-24tRNA-Ile(gat)[95713,95787]  
 gcctgttagcggactggcgtccgatccaagctgataactggcgtaagc  
 ggtgttcgattaccgagcagggtac  
 1-25tRNA-Arg(acg)[95881,95953]  
 gcctctatggtccaacggatatgacccggtctacggaaccggagatgcg  
 tgttcgattcgcgctaggggcac  
 1-26tRNA-Val(gac)[95996,96068]  
 gtccgtgtagctcagggtagagcgctgctcgacacgcaggaggaccga  
 ggttcgaaacctcgcatggacac  
 1-27tRNA-Arg(cct)[96242,96315]  
 gcctctgtagctcaacggacagagcaacgcggtcctaacgcggtggctgg  
 aggttcgaatcctctcggaggcac  
 1-29tRNA-Gln(ttg)[96856,96931]  
 tggggtatggtggcaatctggcagtcgcccggtcttgactccggaggt  
 gcaggttcgagtcctgctaccccatc  
 1-30tRNA-Arg(tct)[96935,97010]  
 gccctgtagctcagtggaagagcgcgagcttctacctcgccggccgg  
 gattcgaatctctccagggcacca  
 1-31tRNA-Gln(ctg)[123129,123203]  
 tgctcgttggtgtaactggcaacactacggactctgactccgtcattta  
 ggttcgaatcctaagcgagcagcca  
 1-32tRNA-Asn(gtt)[123210,123285]  
 tggggtgccgttaatcaggcaaacgagcggactgttaatccgccctgc  
 aggttcgaatcctgccacccagcca

>JN849462.1 Vibriophage phi-pp2, complete genome

1-1tRNA-Ser(gct)c[174369,174457]  
 ggagatatggtctaaaggtatgacagcaccctgctaaggtgtcggacgtt  
 aatagcgttctctgggttcgattccagttatctcccca  
 1-2tRNA-Leu(caa)c[174899,174975]  
 gcccaactagtccaattggcagaggcgttagttcaaacactagatgatc  
 cgagttcgaatctcgggttgggcacca  
 1-3tRNA-Leu(taa)c[175091,175167]  
 gcgcacgtggccaattggcagaggcatgaggcttaaatctcagggatg  
 gcggttcgaatccgccgtgcgtacca

1-4tRNA-Cys(gca)c[175170,175243]  
gcccgaatcgataatggaagatgagggattgcaaatcccgcggtcaga  
gttcgattctctgttcgggtcca  
1-5tRNA-His(gtg)c[175347,175423]  
gtggcagtggtgaagtggaaatacccccgggtgtgattccggaagatg  
cgggttcgatccccgtctgtcacccca  
1-6tRNA-Val(tac)c[175741,175814]  
ggtcccttagtataatggcagtagctcttttacacagagaagaagt  
gctcgattccactagggactacca  
1-7tRNA-Gly(tcc)c[175820,175893]  
gcgggtatgatgtaatggtagcatgacgtcctccaagtcgttcgtctcg  
gttcgagtcctgtaccgctcca  
1-8tRNA-Met(cat)c[176081,176156]  
ggagatgtagctcaagtggtagagcaatggctcataagccattagatcc  
gatttcgagtatcgggtgtctccacca  
1-9tRNA-Arg(tct)c[176661,176736]  
gcgctgtagctcaattggaagagcacgtcccttctaaggatggggttat  
gagttcgaatctatacggcgtgcca  
1-10tRNA-Thr(tgt)c[177133,177208]  
gccctgtagcaccaattggcagtgacgtcacttgtaatgagcaggttcg  
cggttcaaatccgtgtcagggcacca  
1-11tRNA-Gln(ttg)c[177337,177410]  
aggggattgatgtaaaggcagcatacgtgactttgactcacgcagtagccg  
gttcgaatccgttatcccctgcca  
1-12tRNA-Asp(gtc)c[177430,177505]  
ggagccgagggtgaagtgggtgcatgtctccctgtcacggagaaggtagc  
gggttcgaaaccgtcgggtccgcca  
1-13tRNA-Asn(gtt)c[177728,177803]  
gccttattaactcagtcggtagagtgtctggctgtaaccggagagtcgt  
tgggtcaggtccaacataaggcgcca  
1-14tRNA-Asn(gtt)c[177810,177884]  
gggtgtgtagctcagaggcagagcagacggctgtaaccgtcaggtcgag  
attcgaaattctccacgcccgcca  
1-15tRNA-Trp(cca)c[178168,178241]  
agggacatgatgtaacggcagcatgacggattccaaacccgttcgttaga  
gttcgaatctctatgtccctgcca  
1-16tRNA-Ile(gat)c[178248,178321]  
agctccatagtttaacggtaaacacgcgaccgataatcgacgttgaca  
gttcgagtcgtctggggctacca  
1-17tRNA-Ser(tga)c[178386,178471]  
gaaagattctggtagcggcaacggcttgaaaaccgtcggtcaccggga  
ggtaggttaggggtcgaatccctagttctccgcca  
1-18tRNA-Met(cat)c[178497,178568]  
tcgggagtagagcagtggttagctcatcggtctcataagccgaaggtcgt



tggttcgaatccaacctcacgc  
 1-19tRNA-Tyr(gta)c[179134,179219]  
 ggagcgtaagccgcaaggtgcggcagcggactgtaaatccgtgtcccgt  
 atgggaagagaggttcgattcctctacgtccacca  
 1-20tRNA-Glu(ttc)c[179226,179299]  
 gctcgattcgactatcggttagtcacttcccttcaaggaagtaggacgg  
 gttcgactcccgtatcgagtacca  
 1-21tRNA-Lys(ttt)c[179363,179439]  
 gcgtcggttagctcatcatggaagagcaggagcttttaactctcaggtgt  
 ctggttcgagtccagggcggcgtagacca  
 1-22tRNA-Lys(ttt)c[179451,179525]  
 gggtcgttcgtataacggtagtacatctggcttttaaccagaacggtgag  
 agttcgaatctcttgcgaccacca  
 1-23tRNA-Phe(gaa)c[179532,179606]  
 gcacccttagcttatcaggaagcggcggattgaagtcgagtcgctc  
 ggttcgattccgaggggtgcacca  
 1-24tRNA-Leu(tag)c[179608,179685]  
 gcgcaagtagcccaatctggcagaggcactggcttagaaaccagaagtt  
 aagagttagaatctcttctgcgtacca  
 1-25tRNA-Arg(acg)c[180128,180203]  
 gcccgattagctcaattggaagagcagcgcctacgaaggcgaaggttac  
 aagttcgaatctgtattgggtgcca  
 1-26tRNA-Pro(tgg)c[180212,180288]  
 ccgtgactagctcaatctggttagagtactccgttggggcggagaagtta  
 agcgttcgaatcgcttgtcacggacca  
 1-27tRNA-Pro(tgg)c[180298,180371]  
 cgggacgtggcgtaaaggcagcgtcatgcttgggagcatgtggtgaaga  
 gttcgagtctcttcgcccacca  
 1-28tRNA-Met(cat)c[182211,182288]  
 ggccctatagctcaactaggttagagcaaccgactcataatcggtgggtt  
 acaggttcgagccctgttgggtcacca  
 >KU686203.1 Synechococcus phage S-CAM8 isolate 0810PA29, complete genome  
 1-1tRNA-Val(tac)[13494,13565]  
 gcccgaatagctcagcggtagagcagcacctttacacggtgaatgtcggg  
 ggttcgatcccctcttgggca  
 1-2tRNA-Leu(taa)[17517,17603]  
 tgggagtggtggcggaatcggtagacgcaccagacttaaaatctgttgacc  
 aataaggtcgtgggagttcaagtctccctactcctat  
 1-3tRNA-Thr(tgt)[17657,17729]  
 gcctccgtagctcagtggttagagcaggcctttgtaaagctcaggtcga  
 agttcaaattctgtcagaggctc  
 1-4tRNA-Asn(gtt)[17734,17805]  
 tcctccttagctcagcggtagagcgggtgactgttaataatgttcct  
 ggttcgatcccaggagggggag

1-5tRNA-Arg(tct)[154712,154787]  
 tgggtcagtagctcagatggatagagcaactgccttctaagcagtcggcc  
 acaggttcgagtcctgtctgacccgt

>JF461087.1 Salmonella phage FO1a, complete genome

1-1tRNA-Pro(tgg)[23621,23697]  
 ctctgttagctcagcttggtagagcgttccgtttggggcggttaaggccg  
 gaggttcaagtcctccaacagagacca

1-2tRNA-Glu(ttc)[23705,23782]  
 gtccagtagacaaaatggtaaagtcaccactcttcaaagtgatct  
 gaggttcaaatcccttctggaacgcca

1-3tRNA-Met(cat)[23874,23950]  
 tgcgggtatagagaaaggcgtctcacatgtctcattagcatggtatcgg  
 caggttcgactcctgcacccgcctcca

1-4tRNA-Asn(gtt)[24034,24110]  
 ggtaggaagcacataaggtatgtgcggtcgcctgtaaggaatggcac  
 aggttcgaatccctgactaaccgcca

1-5tRNA-Tyr(gta)[24180,24267]  
 gtgtcgttatcccgtagatggtagcgggtgggactgtaaatccctgtca  
 ttgagactcggtaggttcgactcctacacggcacacca

1-6tRNA-Asp(gtc)[24273,24349]  
 ggctatgtagttaactggagaaaatactcccctgtcacgggagatgatg  
 tgagttcaagtctcatcgtacccgcca

1-7tRNA-Lys(ttt)[24778,24853]  
 ggaagtgtagcagaatggtagtcggcagacttttaactctgacaggcgat  
 gggttcgaatccctccacttctacca

1-8tRNA-Met(cat)[24858,24934]  
 ggttcagtcgcagataaggaatgcaagggtctcataagccctatgaatg  
 tgggttcgattcccatctgaacctcca

1-9tRNA-Ile(gat)[25431,25506]  
 gctgtgaaagcacatatggatgtgcattcggctgataaccgaaaggcaga  
 aggttcgaatccttctcacagtacca

1-10tRNA-Ser(tga)[26551,26640]  
 ggtaggtagcggctaattggtagccaaactgtcttgaaaacagttgccact  
 gtagagatacggtaggggttcgactccttacttaccgcc

1-11tRNA-Leu(tag)[26897,26974]  
 gggagattgatggaattggtaaacctatctcgcttagaacgagatgttt  
 gaggttcgaatcccttgtctcctacca

1-12tRNA-Lys(ctt)[26982,27057]  
 gcaggtgtagcaaaatggttatgcggctgactcttaacagtaagacgat  
 ggggtcaatccctccacctgtacca

1-13tRNA-Ala(tgc)[27064,27139]  
 tgggtcatagtttatatggttaaaattcagttttgcaaacttggaact  
 gagttcaattctcagtgactccacca

1-14tRNA-Gly(tcc)[27146,27220]

gcatccatagtttaaacgggaaaattacagtcttccaaactgaggttgag  
 ggttcgattccctctggatgctcca  
 1-15tRNA-Thr(tgt)[27650,27726]  
 gctgcttcgtataattggctattacacatcccttgtaaggatggaaatg  
 caggttcaagtctgtgagcagcacca  
 1-16tRNA-Val(tac)[27822,27896]  
 actcgttagtttatatggtaaaacatcacccctacaagatgaagaaaaa  
 ggttcaagtcctttagttagtacca  
 1-17tRNA-Leu(caa)[27898,27975]  
 gtccagtatcccaattggcagaggatgcaagctcaaacctgtattagt  
 gacggttcgaatccgtcttggaaacacca  
 1-18tRNA-Arg(acg)[28090,28165]  
 gcaggattagttcaaatggatagagcaacagtctacgaagctgtaatatg  
 ggggtcgaatcccttatcctgcgcca  
 1-19tRNA-Gln(ttg)[28750,28825]  
 aggggattagtttacaagggttaaacctcggctttgaaatcgaagaagt  
 tggttcaattccaacatcccccgcca  
 1-20tRNA-Leu(taa)[28828,28906]  
 gctccattactccaattggcagagaggccagactaaaatctgtgttatg  
 tatcggttcgaatccgatatggagtacca  
 1-21tRNA-Gln(ctg)[28912,28987]  
 agcggtatagcataactggcaatgcagcagtctctgaagctgcctatta  
 aggttcaaatccttatgccgctgcca  
 1-22tRNA-His(gtg)[29019,29094]  
 gtggccttatcataaatggtaatgacccatgctgtgaacatggctatac  
 ggggttcaaatcccgtaggtcacccca  
 1-23tRNA-Phe(gaa)[29101,29176]  
 agtccaagtagcttatatggttaaagcgctgtctgaaaaacatgagaag  
 agggttcaaatcccactggactacca  
 1-24tRNA-Ser(gct)[29930,30022]  
 ggaagattaaccctaaaaggtaaggagcagtttgctaaactgccagtag  
 ctgagaaatcggtgtaccagttcaagtcggtatcttctcca  
 1-25tRNA-Cys(gca)[30027,30102]  
 gaatccgtgacagaaatggatatgtgcctgtctgcaaaacaggtttataa  
 ggggttcaagtccttcggattctcca

>KC862296.1 Pseudomonas phage P3\_CHA, complete genome

1-1tRNA-Asn(gtt)[86082,86158]  
 tccgttcggtccctcaaggtgaggagctgactgttaatcaagacgtgc  
 ctggttcgattccaggagcggagcca  
 1-2tRNA-Tyr(gta)[86216,86303]  
 ggaggggtggcagagcggtttaatgcaccggactgtaaatccggcgtccg  
 accgggcatcgctggttcaaatccagccccctccacca  
 1-3tRNA-Gln(ttg)[86505,86581]  
 aggcgtgtggcgaaggtttaacgcactggactttgactccagcatttg

tgggttcgaatcccaccacgtctgcc  
 >AP014715.1 Edwardsiella phage PEi26 DNA, complete sequence  
 1-1tRNA-Asp(gtc)c[75896,75971]  
 ggacctatagtttcagcggttaaaatactcccctgtcacgggagcgtcac  
 gatttcgaatctcgttaggtccgcca  
 1-2tRNA-His(gtg)c[76195,76270]  
 gtggcctaattcagttggtagaattcaagattgtattctttagtcat  
 gggttcaagtcccataggtcacccca  
 1-3tRNA-Asn(gtt)c[76304,76379]  
 ggatgtgtagctcagttggtagagcggtcgcccgttaagtattgtccg  
 cgggtcgaatccgtgcacatccgcca  
 1-4tRNA-Lys(ttt)c[76925,77002]  
 aggacgttagctcagctggtagagcactcgactttaatcgagatgtcg  
 atgggttcaaaccctcacgtcctacca  
 1-5tRNA-Met(cat)c[78068,78144]  
 ggccctatagctcaattggtagagcggcgcataactggtaggttt  
 ccggttcaagtcggatggggccacca  
 1-6tRNA-Leu(taa)c[78610,78698]  
 gcgggtgtggcggtattggcagtacgcatggcacttaaatgccataggg  
 ctttagctcttacgagttcgaatctcgtcacccgtacca  
 >HQ634191.1 Cyanophage Syn10 genomic sequence  
 1-1tRNA-Asn(gtt)c[129314,129387]  
 ttctcttagctcagcggtagagcgattgactgttaatcaattggctccc  
 tgggtcgatcccaggaaggggagt  
 1-2tRNA-Ala(tgc)c[129462,129534]  
 ggggaattagctcagttggtagagcgcctgctttgcaagcaggatgtcag  
 cgggtcgagtcgcgtattctcca  
 1-3tRNA-Thr(tgt)c[129537,129611]  
 gccaaactagctcagctggatagagcaacggtttgtaaaccgtagggtca  
 acggttcaagtcggtgtttggctc  
 1-4tRNA-Leu(taa)c[129799,129885]  
 tgggagcgtggcggaatcggtagacgcaccagacttaaatctgttgaga  
 attaatctcgtgggggtcaattcccccgctcctat  
 1-5tRNA-Val(tac)c[133568,133639]  
 gggcgaatagctcagcggtagagctactcgtttacaccgagtcggtcggg  
 gttcgatcccctcttcgcca  
 1-6tRNA-Arg(tct)c[164477,164552]  
 tgggtcagtagctcagctggatagagcaactgccttctaagcagtcggtc  
 acaggttcgaatcctgtctgaccgt  
 >JF974292.1 Cyanophage S-SSM2 genomic sequence  
 1-1tRNA-Arg(tct)c[81382,81454]  
 gggtcagtagctcagttggatagagcatcgacttctaagcgttggtcgg  
 gggttcaaatccctcctgacccg  
 >HQ634190.1 Cyanophage Syn2 genomic sequence

1-tRNA-Pyl(cta)[98023,98097]

tgggtcagtagttcagcggatagaacaacgctcttctaagcgtgtgtcgtg  
ggggttcgattccctcctgacccgt

1-2tRNA-Val(tac)[127132,127204]

gggcgaatagctcagcggtagagctactcgtttacaccgagtcggtcgagg  
ggttcgatccctccttcgcccac

1-3tRNA-Leu(taa)[131657,131743]

tgggagtggtggcggaatcggtagacgcaccagacttaaaatctgttgaga  
attaatctcgtgggggtcaagccccccactcctat

1-4tRNA-Thr(tgt)[131745,131816]

gcccttatagctcagtggttagagcaacgctttgtaaagcgtaggtcgtt  
ggttcaaatccgactgggggct

1-5tRNA-Ala(tgc)[131819,131892]

ggggaattagctcagttggttagagcgctcgttgaagcaggatgtcag  
gagttcgagtctcctattctccac

1-6tRNA-Asn(gtt)[131897,131968]

tcctcttagctcagcggtagagcgggtgactgttaatcaattggtcct  
ggttcgatcccaggaaggggag

>HQ317391.1 Cyanophage S-SSM6a genomic sequence

1-tRNA-Gly(tcc)[39715,39785]

gcggatgtagtttaatggtaaaatacagagttccaacctctgtcctca  
gttcgattctgagtatccgct

1-2tRNA-Ile(tat)[104572,104644]

gggactatcgcatattggtaaatgccctctgcttataacggagtgaaccg  
agttcaattctcggtagtcctac

1-3tRNA-Thr(tgt)[104647,104722]

gccactttagctcagttggatagagcaacgcatgttaatgcgtaggtcgt  
tcggttcaagtcgacaaagtggtcc

1-4tRNA-Arg(tct)[104725,104800]

gactcaatagctcagttggatagagcaactgccttctaagcagtcggtcgt  
taggttcgagtcctacttgagtcgcc

1-5tRNA-Leu(taa)[104802,104887]

tgggagtggtgggaatcggtagacacaccagacttaaaatctgttgaca  
gcaatgtcgtgggggttcaagccccccactcccat

>HQ316603.1 Cyanophage S-SSM6b genomic sequence

1-tRNA-Leu(taa)c[75473,75554]

gggagcatggcggaatcggtagacgcatcgacttaaaatccgctgaggt  
aactcgtgggggttcaagccccctgctccta

1-2tRNA-Val(tac)c[80679,80750]

gggagattagctcagcggtagagctattcgtttacaccgaatcggtcatt  
ggttcaagtccaatatctccca

1-3tRNA-Arg(tct)c[113704,113778]

tggtccagtagctcagcggaaagagcaactgccttctaagcagttggcca  
taggttcaaatcctatctggatcgt

>HQ317291.1 Synechococcus phage S-RIM2 R9\_2006, complete genome

1-1tRNA-Val(tac)[13782,13853]  
gcccgaatagctcagcggtagacacctcgttacaccgagattgtcggg  
ggttcgatcccctcttcgggca  
1-2tRNA-Leu(taa)[17779,17865]  
tgaggatagggcggaatcggtagacgcaccagactaaaattgttgagg  
gttaacctcgtgagagttcaagtctctactcctat  
1-3tRNA-Thr(tgt)[17922,17994]  
gccccctagctcagtggttagagcagggtttgtaaagctcaggtcgca  
agttcaaatctgtcaggggctc  
1-4tRNA-Ala(tgc)[17997,18069]  
ggggaattagctcagttggtagagcgctgcttgcaagcaggatgtcag  
cggttcgagtcgctattctcca  
1-5tRNA-Asn(gtt)[18116,18189]  
ttcctcagtagctcagcggcagagccatcgactgtaatcgattggctgt  
aggttcaaatcctacctggggagt  
1-6tRNA-Arg(tct)[161226,161300]  
tgggtcagtagctcagcggatagagcaaccgccttctaagcggttggtcg  
caggttcaaatcctgcctgacccgt

>MF158045.1 Shigella phage Sf22, complete genome

1-1tRNA-Arg(tct)c[14055,14130]  
cggggcatagctcagaaggaagagcaaggaccttctaagtcctaggtcgt  
aggttcgatccctactgcctcgacca  
1-2tRNA-His(gtg)c[14135,14210]  
gtggccgtagttcagttggtagaactcgagattgtgattctcgtagtc  
gggttcgactcccatcggtcacccca  
1-3tRNA-Asn(gtt)c[14325,14399]  
ggatgtgtagctcaatggcagagcgatcgctgtaagcgattgggtata  
ggttcaaatcctatcacgtccgcca  
1-4tRNA-Tyr(gta)c[14404,14490]  
ggggagttatcccgtagaggtagcgggtggactgtaaatccattgtcat  
tgcgactcgggtggttcgactccatcactccccacca  
1-5tRNA-Met(cat)c[14503,14577]  
ggcctgtagctggaaggttcaagcaagcgactcataatgccagatggt  
ggttcaattccaccagggccacca  
1-6tRNA-Thr(tgt)c[14579,14654]  
gctgatttagctcagtaggtagagcaactcactgtaatgagaaggtcgg  
cgggttcgattccgtcaatcagacca  
1-7tRNA-Ser(tga)c[14660,14749]  
ggaggcgtggcagagtggtttaatgcaccggtctgaaaaccggcagtcg  
ctccggcgactcataggttcaaatcctatcgctccgcca  
1-8tRNA-Pro(tgg)c[14751,14825]  
ctccgtgtagctcagtttggtagagcgctgatttgggatcaggaggtcc  
aaggttcaaatccttgatggagac

1-9tRNA-Gly(tcc)c[14835,14908]  
gcggatatcgataatggtattacctcagactccaatctgatgatga  
gttcgattctcattatccgctcca  
1-10tRNA-Leu(taa)c[14914,15000]  
gcgagaatggtaaattggtaaaggcacagcacttaaatgctcggaat  
gatttccttgggttcgagtcacacttctcgacca  
1-11tRNA-Gln(ttg)c[15001,15074]  
tgggaattagccaagttggaagcatagcacttgactgctagatgcaa  
aggttcgagtcctttattcccagc

>MF498773.1 *Aeromonas* phage AS-szw, complete genome

1-1tRNA-Thr(tgt)c[62300,62375]  
gccgaattagctcatctgtagagcacagccttgtaacgctgggggtgt  
cgttcgagtcggacattcggcacca  
1-2tRNA-Pro(tgg)c[62655,62730]  
cggtagtagcgcagttgtagcgcgtctggttgggaccagagggtcac  
aggttcgagtcctgtatcaccgacca  
1-3tRNA-Tyr(gta)c[62885,62975]  
ggatgttcggctacgatggcggtagcggcgactgtaaatccgttccc  
tctgggtaaacaagttggtcgaatccaacaacatccacca  
1-4tRNA-Asn(gtt)c[62982,63058]  
tggcgtgtaactcagtaggttagagtggcggactgtaatccgtatgtcg  
tgggttcgaatcccacctcgccagcca  
1-5tRNA-Met(cat)c[63060,63137]  
agcgggggtggagaagtcaggagttctcaccagactcattatctggaaatc  
ggtgggtcaaataccacccccgcttcca  
1-6tRNA-Met(cat)c[63520,63596]  
ggccccttagctcagtaggttagagcagccgactcataatcggttggtca  
ctggttcgagtcagtaggggcccacca  
1-7tRNA-Gly(tcc)c[63681,63756]  
gcgggtaagggtgttatggatacatgcaagcctccaagttgagtagac  
cggatcgttaccggctacccgctcca  
1-8tRNA-Leu(tag)c[63758,63841]  
cgggatgtggtgaaattggcagacacactagattaggttctagcgccat  
aggcgtgacggttcgagtcggtccatcccgacca  
1-9tRNA-Arg(tct)c[63842,63918]  
gcgctgttagctcagttggatagagcaacgttcttctaaagcgtgggtca  
ctggttcgaatccagtacggcgacca  
1-10tRNA-Leu(taa)c[64986,65078]  
gcgtgagtggcgaagttggtgaaacgcacgagcttaaatccgatact  
gcataatggcacatcgtgggttcgattcccacctcacgacca

>MF974178.1 *Pseudomonas* phage YS35, complete genome

1-1tRNA-Thr(tgt)c[68775,68849]  
gccctttaagcatttatggtgatgcaccggcttgaacccggcgaattc  
tgttcaagtcaggaatggggcacca

1-2tRNA-His(gtg)c[69036,69110]  
gtggagattgtgcagcccgatgctgcctccggtgtgacccggtgtt  
ggggttcgagtccccgcctccaacc

1-3tRNA-Glu(ttc)c[69171,69246]  
gcagttatagattaaatggataaatgccagactttcaatctggtgtcc  
gggttcgalccccggttaactgctcca

1-4tRNA-Phe(gaa)c[69253,69328]  
gcgtctgaagctaactaggtagaagcaccgggttgaaattccggaggact  
tggatcgttaccaagcgggcgcacca

1-5tRNA-Gly(tcc)c[69391,69467]  
gcgggtttcgtatagctcgttattattcttggtccaccaagagact  
agggttcgaatccctaagccccgcacca

1-6tRNA-Pro(tgg)c[69475,69552]  
ctctcgtagctcagctcgttagagtgctggatttgaatccgaaggctc  
gaaggttcaaatacctccgggtgacca

1-7tRNA-Asn(gtt)c[69615,69691]  
tccgtacggcccatcaaggcgatggggtcggctgtaaccgaaacgcgc  
taggttcgattcctaggtacggagcca

1-8tRNA-Cys(gca)c[69701,69776]  
ccctcgttgcccgagaggatcaggcagcagattgcaaatactgccatacat  
cgggtcaaatacgcatacaggctcca

1-9tRNA-Met(cat)c[70015,70087]  
agcgtaagactggctggagctgtcactcggctcataaccgagcacaagt  
ggttcgattccacctctcgctac

1-10tRNA-Asp(gtc)c[70188,70266]  
ggccccattagctcagctcggactagagcaagcccctgtctagggaaggt  
cgtcgggttcgaatccgacatgggtcgcca

1-11tRNA-Ile(gat)c[70276,70351]  
agccgggtagctcaattggtagagcaccgaccgataatcgggcggttga  
agggtcaagtccttctctggctacca

1-12tRNA-Leu(tag)c[70562,70646]  
ggccctgtggtggaattggtatacacatcagtccttagaaactgacgccga  
gaggattgagggttcaagtcctccggggccacca

1-13tRNA-Arg(tct)c[71465,71540]  
gctcgtatagcgaatggaaagcgcaacggctcttaagccgtaaggctc  
agggttcgagtcctagtagcagcgcca

1-14tRNA-Gln(ttg)c[71746,71819]  
tgccgcttcgttcaatggtaggacgccagacttgaatctggagatgatg  
gttcgatcccatcagcggtcgcca

>MF787246.1 Lactobacillus phage LpeD, complete genome

1-1tRNA-Gly(tcc)c[136332,136402]  
gcggatatggtgtagtggaacatagctggcctccaaccagttgtcgccg  
gttcaaaccgactatccgct

1-2tRNA-Thr(tgt)c[136557,136629]



tgccctcgtagttcagtggtaaaatacctgtttgtacacaggggtcact  
 agtccgattctagtaggcat  
 1-3tRNA-Pro(tgg)c[136631,136704]  
 caggatataggccagtttggtaggtcgtcggcttgaaccgagaagtcg  
 caagttcgaatcttgcctatcctga  
 1-4tRNA-Trp(cca)c[136724,136798]  
 tatcaaagtaagcttaactggaaaactgttgactccaaatccgattta  
 taggttcgaatcctatctttgatgt  
 1-5tRNA-Phe(gaa)c[137006,137078]  
 gtgtccgtagctcagttggtagagcactgtgtgaagccacgggggtcgt  
 aggtccgaatcctatcgggcaca  
 1-6tRNA-Leu(caa)c[137092,137165]  
 ggacctgtaatccaattggcagagatagcagattcaaatctgtaaaatg  
 ttggttcgaatccaactaggtcca  
 1-7tRNA-Leu(taa)c[137376,137452]  
 tgccctcttagtccaatctggcagagacaatagacttaaaatctatcaag  
 tgtgggtccgaatcccacagagggtat  
 1-8tRNA-Lys(ttt)c[137514,137585]  
 ttatccttagctcaggtggtagagcggcgtcttttagcgtatgtcacc  
 ggttcgactccgtaggataaa  
 1-9tRNA-Leu(tag)c[137717,137792]  
 tgccctcgtagtccaattggcagagatagtggaattagaatccatccagt  
 gtgagttcgagtctcaccgagggtat  
 1-10tRNA-Ser(tga)c[137796,137885]  
 tggataggtataaagtaattggtaccctctggtcttgaaaaccagaaac  
 gattaaaagcgtttgtaggttcgagtcctaccctatccgt  
 1-11tRNA-Asn(gtt)c[137915,137988]  
 ttgctcagtagttcagcggtagaatgtctgattgttactcagaaggctgt  
 tgggtccgaatccaacctgagcagt  
 1-12tRNA-Ser(gct)c[138674,138763]  
 tggaaagttgacagagtgggtgattgtggctccctgctaaggagttaatc  
 gtgttaagcgggtcgggggttcaaaccctcactttccat  
 1-13tRNA-Ile(tat)c[138772,138863]  
 agtcctgtagcataatggtagtcacccggtttatacccggcataaggct  
 ccagattaggtacgatataggttcgaatcctatcaggacta  
 1-14tRNA-Arg(cct)c[139328,139402]  
 tgtactagtaatctaattggataaaatgcttccctcctaaggaagtcttc  
 ccagttcgagtctgggctagtgc  
 1-15tRNA-Arg(tct)c[139626,139699]  
 gcgtccttagctcaactggatagagcaacggccttctaagccgtaggttg  
 tgagttcaagtctcacaggacgca

>MF805809.1 Escherichia phage vB\_EcoM\_PHB05, complete genome

1-1tRNA-Met(cat)[51277,51352]  
 ggttccatagctcactgacgagagcgcacacctataagtgtcgagggca

gggattgtaaccctgggaaccacca  
1-2tRNA-Leu(taa)[51384,51469]  
gcaagtgtggtggaattggtgatacacattgtgctaaaacgcaacgctt  
aaatgattgaggggtcgaatccctccactgcacca  
1-3tRNA-Ser(tga)[51797,51886]  
ggaaggtaggcgcgagcggcgcaaccagggttgaaccctggcccatg  
tagcgatacggatgatggtcgactccattatcttctcca  
1-4tRNA-Ser(gct)[52066,52151]  
ggtagattggtgaaatggtagccacaacagttgctaactgtcgtcgga  
aacggcgtgtaggttcaagtctacatctaccgcca  
1-5tRNA-Lys(ttt)[52278,52353]  
acatcgtagctcagttggtagagcaaggggttttaactccaaggtcga  
aggttcgaatccttcacgatgtacca  
1-6tRNA-Tyr(gta)[52359,52445]  
gtaggtatcgcatagcggcaattgctggagactgtaaattcctgccctt  
cggggcttcgttggttcgagtcgaactacctgcacca  
1-7tRNA-Asn(gtt)[52453,52537]  
gatggattggcctagtggttggcgacggactgttaatccgtgaacgaaa  
gttctagcaaggttcaaatccttgatccatcgcca  
1-8tRNA-Thr(tgt)[52628,52702]  
gctcctatcgataacggctattacggttccttgaagcaacttatcag  
ggttcgagtccttgtgggagcacca  
1-9tRNA-Gly(tcc)[53105,53179]  
gcgggtatagtgtaatggtagcatatgaggtttccaccctccaggtgca  
ggttcaagtcctgttactcgctcca  
1-10tRNA-Gln(ttg)[53279,53353]  
tggagattagcctagtggaaggcaacggccttgaagtcgtgatgacta  
ggttcgattcctagatctccagcca  
1-11tRNA-Pro(tgg)[53361,53436]  
cagtcgctagcgcagttggtagcgtgggagcttggatgcttcgggtcgc  
aggttcgagtcctgccgcactgacca  
1-12tRNA-Phe(gaa)[53442,53516]  
gcagagatagctgagacggattagtgctaccctgaaaaggtagaaggat  
ggatcggtaccatctctctgcacca  
1-13tRNA-Leu(tag)[53594,53678]  
ggctaagtgtggaatggtatacacgatacgcttagaacgtattgcccc  
agggattgtgagttcgagtctcaccttagctacca  
1-14tRNA-Met(cat)[53767,53842]  
tgatagtggaagctggcgttcgagtgcttcataaggcattgcgagaa  
gagttcgattctcttactatcaacca  
1-15tRNA-Met(cat)[53858,53936]  
cgcgggatagaggagctcggctcgtcctcgccagtttcatatgctggagat  
catcggttcgaatccgattcccgcctcca  
1-16tRNA-Ile(gat)[54083,54158]

tgtggtatcgtacagatggtagtacactcgaccgataatcgagaaacaa  
 cgggtcgcactccgtttaccacgacca  
 >MF957259.1 Salmonella phage Melville, complete genome  
 1-1tRNA-Arg(tct)c[62213,62288]  
 gcttctgtagtgaatggatagcacacgatcgttctaaggtcggtagtct  
 ggggtcgaatcctagcagaagcgcca  
 1-2tRNA-Leu(taa)c[62290,62376]  
 gcgagaatggtaaattggtaaagcatagcacttaaatgctacggaga  
 attctccttggggtcgcacttctcgacca  
 1-3tRNA-Met(cat)c[62383,62458]  
 ggtcctgtagctcagcggtagagcggctcccctcataagggattggtcggc  
 agttcgaatcatgccaggccacca  
 1-4tRNA-Thr(tgt)c[62499,62574]  
 gctgatttagctcagtagtagcaactcatttgaatgagaaggccgg  
 cgggtcgattccgtcaatcagacca  
 1-5tRNA-Pro(tgg)c[62579,62655]  
 ctccgtatagctcagtttggtagagcgctggttgggaccaggaggtcc  
 aagggtcgaatcctgtacggagacca  
 1-6tRNA-Gly(tcc)c[62893,62967]  
 gcatccatcgataatggctattatggctggctccaccagcagattgg  
 agttcaattctccatggatgctcca  
 1-7tRNA-Trp(cca)c[63123,63196]  
 aggtctctcgtagtggtattaccctgagctccaacctcagtgacgtgg  
 gttcaattcctacgggcctgcc  
 1-8tRNA-Ser(tga)c[63201,63285]  
 ggagagtagcgcgtagtggtagcaaaccggacttgaaatccgggccaccgg  
 aaacggtaggggtcaactccttactctccgcca  
 1-9tRNA-His(gtg)c[63291,63366]  
 gtgaccgtagttcagttggtagaactcgagattgtgattctcgtagtcga  
 cgggtcaatcccgccggtcaccacca  
 1-10tRNA-Gln(ttg)c[63580,63655]  
 tgggaattagccaagttgtaaggcaccggatttgattccgggatgcac  
 tgggtcgcagccagattccagcca  
 1-11tRNA-Met(cat)c[63662,63737]  
 ggccccttagctcagtggttagagcaggcgactcataatcgcttggtcgc  
 tgggtcaagtcagcaggggccacca  
 >MF919493.1 Mycobacterium phage Audrick, complete genome  
 1-1tRNA-Ser(gct)[30441,30524]  
 ggagggtgagcatcaggtgatgcagcgagattgctaattccgtacggtaa  
 ccaccccgtagggtcgaatcctcctccctccgc  
 1-2tRNA-Leu(cag)[30717,30792]  
 gctcccgtagcccaattggcaggaggcaccagattcaggatctgggcagt  
 gtgagttcgaatctcaccgggagtac  
 1-3tRNA-Leu(gag)[30912,30986]

gtctctgtaggcaaatcgaaaagccgccatcttgaggggtggtgcgtg  
cgggttcgactcccgcagagacac  
1-4tRNA-Leu(caa)[30987,31060]  
gccgtggtaggccatctggcgagccgccagttcaagttcgggtgttgc  
gggttcgaatcccgcacggtac  
1-5tRNA-SeC(tca)[67466,67562]  
attctggcactggtggcgagcccaccggcgagcttcaagctgtcgt  
ggccggagaaccgaccgaaacatcccgttcaacgcgacccagggcc  
1-6tRNA-Pro(tgg)[91423,91497]  
cggggtgtagttcagtttgaagagcgttggttgggaccaagatgtcg  
caggttcgaatcctgtcaccggac  
1-7tRNA-Trp(cca)[91512,91582]  
gggtctgtgcacagggtcccgcaggtctcaaagccgaaggcgggggtt  
cgattccctccaggcctcca  
1-8tRNA-Tyr(gta)[91584,91670]  
cccgatcatgcccaactggtgttgggagcaggctgtaaatctgtggcct  
tcgggacggtgaggttcgattcctcagtcgggacca  
1-9tRNA-Pyl(cta)[92724,92797]  
tgcgagatctgcacggcgactaggagcttctaaccctccgactcgcgg  
gttcgactcccgcactcgcaccc  
1-10tRNA-Met(cat)[92945,93019]  
agcgggtgtagagcagctaggtagctcgggctcataaccggaggacg  
cgtgttcgattcacgccaccggcac  
1-11tRNA-Cys(gca)[93146,93217]  
gcgcctttggcggaatggctacgtgctcggctgcaaccgagttatcccg  
gttcgactccgggaggcgctc  
1-12tRNA-Glu(ctc)[93222,93296]  
ggtccgttgtagtagatggacatctcgccacccttcaaggtggagatca  
cgggttcaagtcctacggactgc  
1-13tRNA-His(gtg)[93298,93371]  
gtggccgtagttcagccggtagaacgctgggtgtgatccagtcgtcga  
gggttcgagtcctccggtcaccc  
1-14tRNA-Ala(tgc)[93533,93607]  
gggcctgtagtccaattggtagagcagcatccttgaagatgacggctg  
tcggttcgaatccgacctggtccac  
1-15tRNA-Phe(gaa)[93797,93869]  
gccgtcatagctcagttggtagagcactggcctgaaaaccagtgccga  
ggttcgattcctcgtgtcggcac  
1-16tRNA-Val(cac)[93875,93948]  
gtccgtttagctcagctggaagagcgctcgggtccacccgagaggccgc  
aggttcgatccctgcaatggacac  
1-17tRNA-Lys(ctt)[94067,94139]  
gccttcgtagctcagtggtagagctgtgcctcttaagcgataggtcgtt  
ggttcgaatccagccgggggcac

1-18tRNA-Glu(ttc)[94144,94220]  
ggtcgggtcgggtctgctggatggccagtcggattttcactccggacatt  
cgcgggttcaattcccgtcccgatcgc

1-19tRNA-Gly(tcc)[94300,94372]  
gcgggtgtggccgaatggctcaggcaccagattccactctggctacgca  
ggttcgattcctgtcatccgctc

1-20tRNA-Thr(cgt)[94432,94506]  
gctgctgtagctcacctggcagagcgtcggcgtcgtatcccgaaggcatc  
cggttcgagtcggacagcagcccc

1-21tRNA-Thr(tgt)[94507,94579]  
gcctctgtgtccagcggcacggacatccgccttctaagcggaggacccc  
cgttcgatccgggtagaggctc

1-22tRNA-Thr(ggt)[94987,95059]  
gtcgggttagctcagtggtagagcgttcctctggtatgggaaagggccgg  
ggttcaatccccgactcagctc

1-23tRNA-Gly(gcc)[96382,96455]  
gcgaaggtagctcagctggcagagcggcacctgccaaagtgagggtcgc  
gggatcgtaacccgttcttcgctc

1-24tRNA-Asp(gtc)[96459,96531]  
ggccctgtagctcagaggaagagcggcgtctgtcgaatcggaggtcgcg  
gtatcgtaatccgtcagggtcgc

1-25tRNA-Met(cat)[96591,96663]  
gcctcactagctcattggtagagccgctcgtcataacgtgcaggtaacct  
ggttcgattccagggtgaggtac

1-26tRNA-Ile(gat)[96669,96743]  
gcctgttagcggactggctgtccgatccaagctgataactggcgtaagc  
ggtgttcgattcaccgagcaggtac

1-27tRNA-Arg(acg)[96837,96909]  
gcctctatggtccaacggatatgacccggctctacggaaccggagatgcg  
tgttcgattcgcgctaggggcac

1-28tRNA-Val(gac)[96952,97024]  
gtccgtgtagctcagggtagagcgcctgctcgacacgcaggaggaccga  
ggttcgaaacctcgcatggacac

1-29tRNA-Arg(cct)[97198,97271]  
gcctctgtagctcaacggacagagcaacgcggtcctaacgcggtggctgg  
aggttcgaatcctctcggaggcac

1-31tRNA-Gln(ttg)[97812,97887]  
tggggtatggtggcaatctggcagtcgcccggttctgactccggaggt  
gcaggttcgagtcctgctaccccatc

1-32tRNA-Arg(tct)[97891,97966]  
gccctgtagctcagtggaagagcggcgagcttctacctcggggccgg  
gagttcgaatctctccagggcacca

1-33tRNA-Gln(ctg)[125078,125152]  
tgctcgttggtgtaactggcaacactacggactctgactccgtcatttta

gggtcgaatcctaagcgagcagcca  
 1-34tRNA-Asn(gtt)[125159,125234]  
 tgggggtgccgttaatcaggcaaacgagcggactgttaatccgccctgc  
 aggttcgaatcctgccaccccagcca  
 >MF919494.1 Mycobacterium phage BeanWater, complete genome  
 1-1tRNA-Ser(gct)[30053,30136]  
 ggagggtgagcatcaggtgatgcagcgagattgctaataccgtacggtaa  
 ccaccccgtgaggttcgaatcctcctccctccgc  
 1-2tRNA-Leu(cag)[30329,30404]  
 gctccctagaccaattggcaggaggcaccagattcaggatctgggcagt  
 gtgagttcgaatctcaccgggagtac  
 1-3tRNA-Leu(gag)[30524,30598]  
 gtctctgtaggcaaatcgaaaagccgccatctgagggggtggtcgtg  
 cgggttcgactccccagagacac  
 1-4tRNA-Leu(caa)[30599,30672]  
 gccgtggtaggcatctggcgagccgccgagttcaagtttcggtgtttgc  
 gggttcgaatccgccccacggtac  
 1-5tRNA-SeC(tca)[67775,67871]  
 attctggcactggtggcgagcccaccggcgagcttcaagctgtcgt  
 ggccggagaaccgacggaaacatcccggtcaacgcgacccagggcc  
 1-6tRNA-Pro(tgg)[91070,91144]  
 cgggggtgagttcagtttgaagagcgcttggttgggaccaagatgtcg  
 caggttcgaatcctgtcaccgccac  
 1-7tRNA-Trp(cca)[91159,91229]  
 gggtctgtgcacagggtgcccagcgtctccaaagccgaaggcgggggtt  
 cgattccctccaggcctgcca  
 1-8tRNA-Tyr(gta)[91231,91317]  
 cccgtacatgcccaactggtgttgggagcaggctgtaaccctgtggcct  
 tcgggacggtgaggttcgattcctcagtcgggacca  
 1-9tRNA-Pyl(cta)[92431,92503]  
 gcaccatttgctcaatggcagagcggcggttctaaaaccgtgagtgccg  
 gttcgactccggcatggtgcacc  
 1-10tRNA-Met(cat)[92653,92727]  
 agcgggtgtagagcagctaggtagctcgccgggctcataaccggaggacg  
 cgtgttcgaatcacgccaccgccac  
 1-11tRNA-Cys(gca)[92854,92925]  
 gcgcctttggcggaatggctacgtgctcggtgcaacccgagttatcccg  
 gttcgactccgggaggcgctc  
 1-12tRNA-Glu(ctc)[92930,93004]  
 ggtccgttgagtagatggatatctgccaccctctcaagtgagatca  
 cgggttcaagtcctacggactgc  
 1-13tRNA-His(gtg)[93006,93079]  
 gtggccgtagttcagccggtagaacgctgggttgtgatccagtcgtcga  
 gggttcgagtcctccggtcaccc

1-14tRNA-Ala(tgc)[93241,93315]  
gggcctgtagctccaattggtagagcagcatccttgaagatgacggctg  
tcggttcgaatccgacctggtccac  
1-15tRNA-Phe(gaa)[93505,93577]  
gccgtcatagctcagttggtagagcactggcctgaaaaccagtgccga  
ggttcgattcctcgtgtcggcac  
1-16tRNA-Val(cac)[93583,93656]  
gtccgttagctcagctggaagagcgctcggccacacccgagaggccgc  
aggttcgatccctgcaatggacac  
1-17tRNA-Lys(ctt)[93776,93849]  
gccttcgtagctcagttggtagagctctcgctcttaagcgagatgtcgc  
aggttcgacccctgccggaggcac  
1-18tRNA-Glu(ttc)[93854,93930]  
ggtcgggtcggctcgtcgttatggccagtcggatttctactccggacatt  
cgcgggttcaattcccgtcccgatcgc  
1-19tRNA-Gly(tcc)[94010,94082]  
gcgggtgtggccgaatggctcaggcaccagattccactctggctacgca  
ggttcgattcctgtcatccgctc  
1-20tRNA-Thr(cgt)[94142,94216]  
gctgctgtagctcacctggcagagcgtcggcgtcgtatcccgaagcattc  
cggttcgagtcggacagcagcccc  
1-21tRNA-Thr(tgt)[94217,94289]  
gcctctgtggtccagcggcacggacatccgccttgaagcggaggacccc  
cgttcgatccgggtagaggctc  
1-22tRNA-Thr(ggt)[94349,94421]  
gctgggttagctcagtggtagagcgttcctctggtatgggaaagggccgg  
ggttcaatcccccgactcagctc  
1-23tRNA-Gly(gcc)[95744,95817]  
gcgaaggtagctcagctggcagagcgccaccttgccaaggtggaggtcgc  
gggatcgttaaccgttcttcgctc  
1-24tRNA-Asp(gtc)[95821,95893]  
ggccctgtagctcagaggaagagcgccggtctgtcgaatcgaggtcgcg  
gtatcgtaatccgtcagggtcgc  
1-25tRNA-Met(cat)[95953,96025]  
gcctcactagctcattggtagagccgctcgtcataacgtgcaggtacct  
ggttcgattccagggtgaggtac  
1-26tRNA-Ile(gat)[96031,96105]  
gcctgttagcggactggtcgtccgatccaagctgataactggcgtaagc  
ggtgttcgattaccgagcaggtac  
1-27tRNA-Arg(acg)[96199,96271]  
gcctctatggtccaacggatatgacccggtctacggaaccggagatgcg  
tgttcgattcgcgtaggggcac  
1-28tRNA-Val(gac)[96314,96386]  
gtccgtgtagctcagggtagagcgctgctcgacacgcaggaggaccga

ggttcgaaacctcgcatggacac  
1-29tRNA-Arg(cct)[96560,96633]  
gcctctgtagctcaacggacagagcaacgcggtcctaacgcggtggctgg  
aggttcgaatcctctcggaggcac  
1-31tRNA-Gln(ttg)[97174,97249]  
tggggtatggcgaatctggcagtcgcccgactttgactccggagggt  
gcaggttcgagtcctgctaccccatc  
1-32tRNA-Arg(tct)[97253,97328]  
gccctttagctcagtggaacagagcggcgagcttctacctcgcgggcccgg  
gagttcgaatcctctccaggggcacca  
1-33tRNA-Gln(ctg)[125033,125107]  
tgctcgttggtgtaactggcaacactacggactctgactccgtcattta  
ggttcgaatcctaagcgagcagcca  
1-34tRNA-Asn(gtt)[125114,125190]  
tggggtgtagttcaatctggcagaacgctcgactgttaatcgagtagttg  
aaggttcgagtccttccatcccagcca

>MF919495.1 Mycobacterium phage Bigswole, complete genome

1-1tRNA-Ser(gct)[33880,33963]  
ggagggtgagcatcaggtgatgcagcgagattgctaatacccgtacggtaa  
ccaccccgtgaggttcgaatcctcctccctccgc  
1-2tRNA-Leu(cag)[34159,34244]  
gcctcgggtacgtaatggaagccgtgctgcactcagactgcagtgccga  
aagggcgtgagggttcgactccctcccagggtacca  
1-3tRNA-Leu(gag)[34245,34318]  
agccctgtatcccaacggcagaggaagcggctcgagaggccgttcagtg  
agggttcgaatccctctggggcac  
1-4tRNA-Leu(caa)[34319,34393]  
gccgcagtatgcaaaccggaaaagcagccgtactcaaaatgcggtgcgtg  
cgggttcgatccccgctgcggtac  
1-5tRNA-SeC(tca)[69722,69818]  
attctggcactggtggcgagcccaccggcgagcttcaagctgtcgt  
ggccggagaaccgaccggaacatcccgttcaacgcgacccagggcc  
1-6tRNA-Pro(tgg)[93826,93898]  
cggggtgtagttcagtggaagagcgttggttgggaccaagatgtcgca  
ggttcgaatcctgtcaccccgac  
1-7tRNA-Trp(cca)[93915,93990]  
tggggtgaagccgatctggaaggcagcggtctcaaagccgtctcatagc  
gggttcgaatcccgtcacccctgcca  
1-8tRNA-Tyr(gta)[93992,94078]  
gccgcacatgcccaactggtgttgggagcaggctgtaaccctgtggcct  
tcgggacggtgaggttcgattcctcagtcggtacca  
1-9tRNA-Pyl(cta)[95187,95259]  
gcaccatttgctcaatggcagagcggcggttctaaaaccgtgagtgccg  
gttcgactccggcatggtgcacc



1-10tRNA-Met(cat)[95409,95483]  
agcgggttagagcagctaggtagctcgccgggctcataaaccggaggacg  
cgtgttcgaatcacgccaccgccac  
1-11tRNA-Cys(gca)[95610,95681]  
gcgcctttggcggaatggctacgtgctcggtgcaacccgagttatcccg  
gttcgactccgggaggcgctc  
1-12tRNA-Glu(ctc)[95686,95760]  
ggtcggttgagtagatggatatctgccaccctctcaagtgagatca  
cgggttcaagtcccgtacggactgc  
1-13tRNA-His(gtg)[95762,95835]  
gtggccgtagttcagccggtagaacgctgggttgtgatccagtcgtcga  
gggttcgagtcctccggtcaccc  
1-14tRNA-Ala(tgc)[95997,96071]  
gggccttagctccaattggtagagcagcatccttgaagatgacggctg  
tcggttcgaatccgacctggtccac  
1-15tRNA-Phe(gaa)[96261,96333]  
gccgtcatagctcagttggtagagcactggcctgaaaaccagtggccga  
ggttcgattcctcgtgtcggcac  
1-16tRNA-Val(cac)[96339,96412]  
gtccgttagctcagctggaagagcgctcgggtccacacccgagaggccgc  
aggttcgatccctgcaatggacac  
1-17tRNA-Lys(ctt)[96531,96604]  
gccttcgtagctcagttggtagagctctcgctcttaagcgagatgtcgc  
aggttcgacccctgccggaggcac  
1-18tRNA-Glu(ttc)[96609,96685]  
ggtcgggtcggtctgctggatggccagtcggatttctactccgacatt  
cgcgggttcaattcccgtcccgatcgc  
1-19tRNA-Gly(tcc)[96765,96837]  
gcgggtgtggccgaatggctcaggcaccagattccactctggctacgca  
ggttcgattcctgtcatccgctc  
1-20tRNA-Gly(tcc)[96937,97009]  
gcgggtgtggccgaatggctcaggcaccagattccactctggctacgca  
ggttcgattcctgtcatccgctc  
1-21tRNA-Thr(cgt)[97069,97142]  
gctgctgtagctcacctggcagagcgctcggcgtcgtatcccgaaggcatc  
cggttcgagtcggacagcagctc  
1-22tRNA-Thr(tgt)[97216,97289]  
gccctttagctcagtggcagagcaccgatcttgaatcgggttgtcga  
gcgttcgattcgttctctgggctc  
1-23tRNA-Thr(ggt)[97333,97405]  
gctgggttagctcagtggtagagcgttccttggtatgggaaaggcccg  
ggttcaatccccgactcagctc  
1-24tRNA-Gly(gcc)[98728,98801]  
gcgaagtagctcagctggttagagcggcaccttgccaaggtggaggtcgc

gggatcgtaaccgttcttcgctc  
1-25tRNA-Asp(gtc)[98805,98877]  
ggccctgtagctcagaggaagagcgccggtctgtcgaatcgagggtcgcg  
gtatcgtaatccgtcagggtcgc  
1-26tRNA-Met(cat)[98937,99009]  
gcctcactagctcattggtagagccgctcgtcataacgtgcaggtaacct  
ggttcgattccaggtgaggtac  
1-27tRNA-Ile(gat)[99015,99089]  
gcctgttagcggactggctcgtccgatccaagctgataactggcgtaagc  
ggtgttcgattcaccgagcaggtac  
1-28tRNA-Arg(acg)[99183,99255]  
gcctctatggtccaacggatatgacccggtctacgaaccggagatgcg  
tgttcgattcgcgtaggggcac  
1-29tRNA-Val(gac)[99298,99370]  
gtccgtgtagctcaggggtagagcgctgctcgacacgcaggaggaccga  
ggttcgaaacctcgcatggacac  
1-30tRNA-Arg(cct)[99544,99617]  
gcctctgtagctcaacggacagagcaacgcggtcctaacgcggtggctgg  
aggttcgaatcctctcggaggcac  
1-32tRNA-Gln(ttg)[100146,100221]  
tggggtatggtggcaatccggcagtcgcccgactttgactccggaggt  
gcaggttcgagtcctgctaccccatc  
1-33tRNA-Arg(tct)[100225,100300]  
gccctgttagctcagtgagacagcggcgagcttctacctcgccggccgg  
gagttcgaatctctccagggcacca  
1-34tRNA-Gln(ctg)[127755,127829]  
tgctcgttggtgtaactggcaacactacggactctgactccgtcattta  
ggttcgaatcctaagcgagcagcca  
1-35tRNA-Asn(gtt)[127836,127912]  
tggggtgtagttcaatctggcagaacgctcgactgttaatcgagtagttg  
aaggttcgagtcctccatcccagcca

>MF919499.1 Mycobacterium phage Daffodil, complete genome

1-1tRNA-Ser(gct)[31551,31634]  
ggagggtagcatctggtgatgcaggggtcctgctaaggccctacggatt  
cacaccgtgagtttcgattactcctccctccgc  
1-2tRNA-Leu(cag)[31731,31807]  
gccctgctgagcaactggcaaagctgccgattcagagtgcgggtcatt  
tcggggttcgactccgggcagggtag  
1-3tRNA-Leu(gag)[31927,32001]  
gtctctgtaggcaaatcgaaaagcccatctgagggggtggtgcgtg  
cgggttcgactcccgcagagacac  
1-4tRNA-Leu(caa)[32002,32075]  
gccgtgtaggccatctggcgagcccgagttcaagtttcggtgtttgc  
gggttcgaatcccggccacgtac

1-5tRNA-SeC(tca)[68479,68575]  
attctggcactggtgggcgagcccaccggcgagcttcaagctgtcgt  
ggccggagaaccgaccggaacatcccgttcaacgcgacccagggcc  
1-6tRNA-Pro(tgg)[91784,91858]  
cggggtgtagttcagtttgaagagcgcttggttgggaccaagttgcg  
caggttcgaatcctgtcaccccgac  
1-7tRNA-Trp(cca)[91873,91943]  
gggtctgtgcacaggtgcccacggtctccaaagccgaaggcgggggtt  
cgattccctccaggcctgcca  
1-8tRNA-Pyl(cta)[93140,93212]  
gcaccatttgctcaatggcagagcggcggttctaaaaccgtgagtgccg  
gttcgactccggcatggtgcacc  
1-9tRNA-Met(cat)[93362,93436]  
agcgggtgtagagcagctaggtagctcgccgggctcataaccggaggacg  
cgtgttcgaatcacgccaccgccac  
1-10tRNA-Cys(gca)[93563,93634]  
gcgccttggcggaatggctacgtgctcggtgcaacccgagttatcccg  
gttcgactccgggagggcgctc  
1-11tRNA-Glu(ctc)[93639,93713]  
ggtccgttgagtagatggatatctgccaccctctcaaggtggagatca  
cgggttcaagtcccgtacggactgc  
1-12tRNA-His(gtg)[93715,93788]  
gtggccgtagttcagccggtagaacgctgggttgtgatccagtcgtcga  
gggttcgagtcctccggtcaccc  
1-13tRNA-Ala(tgc)[93950,94024]  
gggcctgtagctccaattggtagagcagcatccttgaagatgacggctg  
tcggttcgaatccgacctggtccac  
1-14tRNA-Phe(gaa)[94214,94286]  
gccgtcatagctcagttggtagagcactggcctgaaaaccagtgggccga  
ggttcgattcctcgtgtcggcac  
1-15tRNA-Val(cac)[94292,94365]  
gtccgttagctcagctggaagagcgctcggtccacacccgagaggccgc  
aggttcgatccctgcaatggacac  
1-16tRNA-Lys(ctt)[94484,94556]  
gccttcgtagctcagtggtagagctgtcgccctctaagcgataggtcgtt  
ggttcgaatccagccgggggcac  
1-17tRNA-Glu(ttc)[94561,94637]  
ggtcgggtcgggtcgtcgttatggccagtcggattttcactccggacatt  
cgcgggttcaattcccgtcccgatcgc  
1-18tRNA-Gly(tcc)[94717,94789]  
gcgggtgtggccgaatggctcaggcaccagattccactctggctacgca  
ggttcgattcctgtcatccgctc  
1-19tRNA-Thr(cgt)[94849,94923]  
gctgctgtagctcacctggcagagcgtcggcgtcgtatcccgaaggcatc

cggttcaggtccggacagcagcccc  
 1-20tRNA-Thr(tgt)[94924,94996]  
 gcctctgtgtccagcggcacggacatccgccttgaagcggaggacccc  
 cgttcgatccgggtagaggctc  
 1-21tRNA-Thr(ggt)[95056,95128]  
 gctgggttagctcagtggttagagcgttccttggatgggaaagggccgg  
 ggttcaatccccgactcagctc  
 1-22tRNA-Gly(gcc)[96451,96524]  
 gcgaaggtagctcagctggcagagcgcaccttgccaagtgagggtcgc  
 gggatcgtaacccgttcttcgctc  
 1-23tRNA-Asp(gtc)[96528,96600]  
 ggcctgtagctcagaggaagagcggcgtctgtcgaatcgagggtcgcg  
 gtatcgtaatccgtcagggtcgc  
 1-24tRNA-Met(cat)[96660,96732]  
 gcctcactagctcattggtagagccgctcgtcataacgtgcaggtacct  
 ggttcgattccagggtgaggtac  
 1-25tRNA-Ile(gat)[96738,96812]  
 gcctgttagcggactggctcgtccgatccaagctgataactggcgtaagc  
 ggtgttcgattaccgagcaggtac  
 1-26tRNA-Arg(acg)[96906,96978]  
 gcctctatggtccaacggatatgacgccggtctacggaaccggagatgcg  
 tgttcgattcgcgctaggggcac  
 1-27tRNA-Val(gac)[97021,97093]  
 gtccgttagctcaggggtagagcgcctgctcgacacgcaggaggaccga  
 ggttcgaaacctcgcatggacac  
 1-28tRNA-Arg(cct)[97267,97340]  
 gcctctgtagctcaacggacagagcaacgcggtcctaacgcggtggctgg  
 aggttcgaatcctctcggaggcac  
 1-30tRNA-Gln(ttg)[97881,97956]  
 tgggggtatgggtgcaatctggcagtcgcccggaacttgactccggaggt  
 gcaggttcgagtcctgctaccccatc  
 1-31tRNA-Arg(tct)[97960,98033]  
 gccctgttagctcagtggaagagcggcgagcttctacctcgggccgg  
 gattcgaatctctccaggggcac  
 1-32tRNA-Lys(ttt)[98101,98177]  
 gggccggtatcttagtctgggtcaaagaagtggacttttaatccgcgcgc  
 gtgggttcgaatcccacccggcccacc  
 1-33tRNA-Gln(ctg)[126216,126290]  
 tgctcgttggtgtaactggcaacactacggactctgactccgtcattta  
 ggttcgaatcctaagcgagcagcca  
 1-34tRNA-Asn(gtt)[126297,126372]  
 tggggtgtccgttaatcaggcaaacgagcggactgttaatccggccctgc  
 aggttcgaatcctgccacccagcca

>MF919513.1 Mycobacterium phage Koguma, complete genome

1-1tRNA-Ser(gct)[28941,29024]  
ggagggtgagcatcaggtgatgcagcgagattgctaatacccgtacggtaa  
ccaccccgtgaggttcgaatcctcctccctccgc  
1-2tRNA-Leu(cag)[29217,29292]  
gtctccctagcccaattggcaggaggcaccagattcaggatctgggcagt  
gtgagttcgaatctcaccgggagtac  
1-3tRNA-Leu(gag)[29412,29486]  
gtctctgtaggcaaatcgaaaagccgcatcttgagggggtggtgcgtg  
cgggttcgactcccgcagagacac  
1-4tRNA-Leu(caa)[29487,29560]  
gccgtggtaggcatctggcgagccgccgagttcaagttcgggtttgc  
gggttcgaatcccgcacggtac  
1-5tRNA-SeC(tca)[65924,66020]  
attctggcactggtggcgagcccaccggcgagcttcaagctgtcgt  
ggccggagaatcgaccgaaacatccgttcaacgcgacccagggcc  
1-6tRNA-Pro(tgg)[89638,89712]  
cggggtgtagttcagtttgaagagcgttggttgggaccaagttgtcg  
caggttcgaatcctgtcaccgac  
1-7tRNA-Trp(cca)[89727,89797]  
gggtctgtgcacagggtgcccagcgtctccaaagccgaagcgggggtt  
cgattccctccaggcctgcca  
1-8tRNA-Pyl(cta)[90989,91061]  
gcaccatttgctcaatggcagagcggcggttctaaaaccgtgagtgccg  
gttcgactccggcatggtgcacc  
1-9tRNA-Met(cat)[91211,91285]  
agcgggtgtagcagctaggtagctcgccgggctcataaccggaggacg  
cgtgttcgaatcacgccaccgcccac  
1-10tRNA-Cys(gca)[91412,91483]  
gcgcctttggcggaatggctacgtgctcggtgcaacccgagttatcccg  
gttcgactccgggaggcgctc  
1-11tRNA-Glu(ctc)[91488,91562]  
ggtccgttgagtagatggatatctgccaccctctcaagtgagatca  
cgggttcaagtcccgtacggactgc  
1-12tRNA-His(gtg)[91564,91637]  
gtggccgtagttcagccggtagaacgctgggttgtatccagtcgtcga  
gggttcgagtcctccggtcaccc  
1-13tRNA-Ala(tgc)[91799,91873]  
gggcctgtagtccaattggtagagcagcatccttgaagatgacggctg  
tcggttcgaatccgacctggtccac  
1-14tRNA-Phe(gaa)[92063,92135]  
gccgtcatagctcagttggtagagcactggcctgaaaaccagtgccga  
gggttcgattcctcgtgtcggcac  
1-15tRNA-Val(cac)[92141,92214]  
gtccgttagctcagctggaagagcgtcgggtccacaccgagaggccgc

aggttcgatccctgcaatggacac  
1-16tRNA-Lys(ctt)[92334,92407]  
gccttcgtagctcagttggtagagctctgcctcttaagcgagatgtcgc  
aggttcgacccctgccggaggcac  
1-17tRNA-Glu(ttc)[92412,92488]  
ggtcgggtcggctcgtggtatggccagtcggattttcactccggacatt  
cgcgggttcaattcccgtcccgatcgc  
1-18tRNA-Gly(tcc)[92568,92640]  
gcgggtgtggccgaatggctcaggcaccagattccactctggctacgca  
ggttcgattcctgtcatccgctc  
1-19tRNA-Thr(cgt)[92700,92774]  
gctgctgtagctcacctggcagagcgtcggcgtcgtatcccgaaggcatc  
cggttcgagtccggacagcagcccc  
1-20tRNA-Thr(tgt)[92775,92847]  
gcctctgtgtccagcggcacggacatccgccttgaagcggaggacccc  
cgttcgatccgggtagaggctc  
1-21tRNA-Thr(ggt)[92907,92979]  
gctgggttagctcagtggtagagcgttcctctggtatgggaaaggcccg  
ggttcaatccccgactcagctc  
1-22tRNA-Gly(gcc)[94724,94799]  
gcggttatagctcagcctggccagagcatcacgttgccaacgtgaacgtc  
gcgggttcaaatcccgtagccgctc  
1-23tRNA-Asp(gtc)[94813,94885]  
ggcctgtagctcagaggaagagcgcgggtctgtcgaatcggaggtcgcg  
gtatcgtaatccgtcagggtcgc  
1-24tRNA-Met(cat)[94945,95017]  
gcctcactagctcattggtagagccgctcgtcataacgtgcaggtacct  
ggttcgattccagggtgaggtac  
1-25tRNA-Ile(gat)[95023,95097]  
gcctgttagcggactggctcgtccgatccaagctgataactggcgtaagc  
ggtgttcgattcaccgagcaggtac  
1-26tRNA-Arg(acg)[95191,95263]  
gcctctatggtccaacggatatgacgccggtctacggaaccggagatgcg  
tgttcgattcgcgctaggggcac  
1-27tRNA-Val(gac)[95306,95378]  
gtccgtgtagctcagtggtagagcgcctgctcgacacgcaggaggaccga  
ggttcgaaacctcgcatggacac  
1-28tRNA-Arg(cct)[95552,95625]  
gcctctgtagctcaacggacagagcaacgcggtcctaacgcggtggctgg  
aggttcgaatcctctcggaggcac  
1-30tRNA-Gln(ttg)[96166,96241]  
tggggtatggtggcaatctggcagtcgcccggaacttgactccggaggt  
gcaggttcgagtcctgtacccatc  
1-31tRNA-Arg(tct)[96245,96320]

gcccttgtagctcagtggaacagagcggcgagcttctacctcgcgggcccgg  
gagttcgaatctctccagggcacca  
1-32tRNA-Gln(ctg)[125283,125357]  
tgctcgttggtgtaactggcaacactacggactctgactccgtcattctt  
ggttcgaatccagggcgagcaacca  
1-33tRNA-Asn(gtt)[125364,125439]  
tggggtgccgttaatcaggcaaacgagcggactgttaatccgtccctgc  
aggttcgaatcctgccaccccagcca

>MF919527.1 Mycobacterium phage Phox, complete genome

1-1tRNA-Ser(gct)[31442,31525]  
ggagggtgagcatctggtgatgcaggggtcctgctaaggccctacggatt  
cacaccgtgagtttcgattactcctccctccgc  
1-2tRNA-Leu(cag)[31622,31698]  
gccctgctgagcaaacaggcaaacgctgccgattcagagtcgggtcatt  
tccgggttcgactcccgggcagggtac  
1-3tRNA-Leu(gag)[31818,31892]  
gtctctgtaggcaaatcgaaaagcccatcttgaggggtggtgcgtg  
cgggttcgactcccgcagagacac  
1-4tRNA-Leu(caa)[31893,31966]  
gccgtggtaggccatctggcgagccgccagttcaagtttcggtgtttgc  
gggttcgaatcccgcacgggtac  
1-5tRNA-SeC(tca)[68756,68852]  
attctggcactggtggcgagcccaccggcgagcttcaagctgtcgct  
ggccggagaaccgaccggaacatccgttcaacgcgacccagggcc  
1-6tRNA-Pro(tgg)[92518,92592]  
cggggtgtagttcagtttgaagagcgttggtttgggaccaagatgtcg  
caggttcgaatcctgtcaccgccgac  
1-7tRNA-Trp(cca)[92607,92677]  
gggtctgtgcacagggtgcccgcggtctccaaagccgaaggcgggggtt  
cgattccctccaggcctgcca  
1-8tRNA-Tyr(gta)[92679,92765]  
cccgtacatgcccaactggtgttgggagcaggctgtaaccctgtggcct  
tcgggacggtgaggttcgattcctcagtcgggacca  
1-9tRNA-Pyl(cta)[93879,93951]  
gcaccatttgctcaatggcagagcggcggttctaaaaccgtgagtgccg  
gttcgactccggcatggtgcacc  
1-10tRNA-Met(cat)[94101,94175]  
agcgggtgtagagcagctaggtagctcgccgggtcataaccggaggacg  
cgtgttcgaatcacgccaccgccac  
1-11tRNA-Cys(gca)[94302,94373]  
gcgccttggcggaatggctacgtgctcggtcgaacccgagttatcccg  
gttcgactccgggaggcgctc  
1-12tRNA-Glu(ctc)[94378,94452]  
ggtccgttgagtagatggatatctgccaccctctcaagtgagatca

cgggttcaagtcccgtacggactgc  
1-13tRNA-His(gtg)[94454,94527]  
gtggccgtagttcagccggtagaacgctgggttgatcccagtcgtcga  
gggttcgagtcctccggtcaccc  
1-14tRNA-Ala(tgc)[94689,94763]  
gggcctgtagctccaattggtagagcagcatcctgcaagatgacggctg  
tcggttcgaatccgacctgggtccac  
1-15tRNA-Phe(gaa)[94953,95025]  
gccgtcatagctcagttggtagagcactggcctgaaaaccagtggtccga  
ggttcgattcctcgtgtcggcac  
1-16tRNA-Val(cac)[95031,95104]  
gtccgttagctcagctggaagagcgtcggccacacccgagaggccgc  
aggttcgatccctgcaatggacac  
1-17tRNA-Lys(ctt)[95224,95297]  
gccttcgtagctcagttggtagagctctgcctttaagcgagatgtcgc  
aggttcgacccctgccggaggcac  
1-18tRNA-Glu(ttc)[95302,95378]  
ggtcgggtcggctcgtggtatggccagtcggatttctactccggacatt  
cgcgggttcaattcccgtcccgatcgc  
1-19tRNA-Gly(tcc)[95458,95530]  
gcgggtgtggccgaatggctcaggcaccagattccactctggctacgca  
ggttcgattcctgtcatccgctc  
1-20tRNA-Gly(tcc)[95630,95702]  
gcgggtgtggccgaatggctcaggcaccagattccactctggctacgca  
ggttcgattcctgtcatccgctc  
1-21tRNA-Thr(cgt)[95762,95836]  
gtgctgtagctcacctggcagagcgtcggcgtcgtatcccgaaggcatc  
cgggttcgagtcggacagcagcccc  
1-22tRNA-Thr(tgt)[95837,95909]  
gcctctgtgtccagcggcacggacatccgccttgtaagcggaggacccc  
cgttcgatccgggttagaggctc  
1-23tRNA-Thr(ggt)[95969,96041]  
gtcgggttagctcagtggtagagcgttcctctggtatgggaaaggccgg  
ggttcaatccccgactcagctc  
1-24tRNA-Gly(gcc)[97364,97437]  
gcgaaggtagctcagctggcagagcggccaccttgccaaggaggagtcgc  
gggatcgtaacccgttcttcgctc  
1-25tRNA-Asp(gtc)[97441,97513]  
ggcctgtagctcagaggaagagcggcgtctgtcgaatcgagggtcgcg  
gtatcgtaatccgtcagggtcgc  
1-26tRNA-Met(cat)[97573,97645]  
gcctcactagctcattggtagagccgctcgtcataacgtgcaggtacct  
ggttcgattccagggtgaggtac  
1-27tRNA-Ile(gat)[97651,97725]



gcctgttagcggactggctcgtccgatccaagctgataacttggcgtaagc  
ggtgttcgattcaccgagcaggtac  
1-28tRNA-Arg(acg)[97819,97891]  
gcctctatggtccaacggatatgacccggtctacggaaccggagatgcg  
tgttcgattcgcgctaggggcac  
1-29tRNA-Val(gac)[97934,98006]  
gtccgttagctcaggggtagagcgcctgctcgacacgcaggaggaccga  
ggttcgaaacctcgcatggacac  
1-30tRNA-Arg(cct)[98180,98253]  
gcctctgtagctcaacggacagagcaacgcggtcctaacgcggtggctgg  
aggttcgaatcctctcggaggcac  
1-32tRNA-Gln(ttg)[98794,98869]  
tggggtatggtggcaatctggcagtcgcccggaattgactccggaggt  
gcaggttcgagtcctgctaccccatc  
1-33tRNA-Arg(tct)[98873,98948]  
gccctttagctcagtgagacagagcggcgagcttctacctcgccggccgg  
gagttcgaatcctctccaggggcacca  
1-34tRNA-Gln(ctg)[125841,125915]  
tgctcgttggtgtaactggcaacactacggactctgactccgtcattctt  
ggttcgaatccagggcgagcaacca  
1-35tRNA-Asn(gtt)[125922,125997]  
tggggtgtccgttaatcaggcaaacgagcggactgttaatccgtccctgc  
aggttcgaatcctgccaccccagcca

>KX349249.1 Synechococcus phage S-RIM2 isolate Np\_20\_0912, complete genome

1-1tRNA-Val(tac)[13794,13865]  
gcccgaatagctcagcggtagagcacctcgtttacaccgagattgtcggc  
ggttcgatcccgtcttcgggca  
1-2tRNA-Leu(taa)[17791,17877]  
tgggagtatggcggaatcggtagacgcaccagacttaaaattgttgagg  
gttaacctcgtgagagttcaagtcctctactcctat  
1-3tRNA-Thr(tgt)[17934,18006]  
gccccgtagctcagtggtagagcaggcctttgtaaagctcaggtcgca  
agttcaaatcttgtcaggggctc  
1-4tRNA-Ala(tgc)[18009,18081]  
ggggaattagctcagttggtagagcgcctgtttgcaagcaggatgtcag  
cggttcgagtcgcgtattctcca  
1-5tRNA-Asn(gtt)[18128,18201]  
ttcctcagtagctcagcggcagagccatcgactgttaatcgattggctgt  
aggttcaaatcctacctggggagt  
1-6tRNA-Arg(tct)[161241,161315]  
tgggtcagtagctcagcggatagagcaaccgccttctaagcggttggtcg  
caggttcaaatcctgcctgacccgt

>AF234173.1 Enterobacteria phage P1 mod1902::IS5 c1.100 rev dmt(del)MB mutant, complete genome

1-1tRNA-Asn(gtt)[69029,69104]

gatggtgtagctcagcggttagagcggtgactgttaatcaacgggtcga  
tggttcaatccatccaccatcgcca  
1-2tRNA-Thr(tgt)[69107,69182]  
gccggttagctcagttggttagagcgctgccttgaagcaggatgtcag  
cggttcgagtccttaatcgccacca  
1-3tRNA-Met(cat)[70614,70689]  
ggcccttagctcagtggttagagctggcgactcataatcgacggtcac  
cggttcaagtccgtaggggccacca

>KX147096.1 Serratia phage vB\_Sru\_IME250, complete genome

1-1tRNA-Tyr(gta)c[65698,65781]  
gtgagagtggcagagcggtcgattgcgggggactgtaaatcccttctgaa  
aggcgcggtggttcgaatccatcctctcacacca  
1-2tRNA-Asn(gtt)c[66666,66741]  
gatggtgtagttcagtcggtagaacggcggtctgttaaatcgtatgtcgc  
aggttcaagtcctgtcaccatcgcca  
1-3tRNA-Trp(cca)c[66751,66826]  
atctccttggtctagcggctatgatgccagcctcaaagccgtgcgaccc  
aggttcgagtcctggaggggatgcca  
1-4tRNA-Met(cat)c[67068,67143]  
ggctcctgtagctcagtggttagagcagtcgactcataatcgattggtcat  
tggttcaaaaccaatcaggatcacca

>KY073123.1 Serratia phage vB\_Sru\_IME250, complete genome

1-1tRNA-Tyr(gta)c[65698,65781]  
gtgagagtggcagagcggtcgattgcgggggactgtaaatcccttctgaa  
aggcgcggtggttcgaatccatcctctcacacca  
1-2tRNA-Asn(gtt)c[66666,66741]  
gatggtgtagttcagtcggtagaacggcggtctgttaaatcgtatgtcgc  
aggttcaagtcctgtcaccatcgcca  
1-3tRNA-Trp(cca)c[66751,66826]  
atctccttggtctagcggctatgatgccagcctcaaagccgtgcgaccc  
aggttcgagtcctggaggggatgcca  
1-4tRNA-Met(cat)c[67068,67143]  
ggctcctgtagctcagtggttagagcagtcgactcataatcgattggtcat  
tggttcaaaaccaatcaggatcacca

>GU071092.1 Prochlorococcus phage P-SSM2, complete genome

1-1tRNA-Asn(gtt)[164089,164176]  
ttgtgagtgacgaaattggtaaactgtcagtcctgtttaactgatgttc  
ctggcgggactgaaggttcgactccttcctcacagt

>KM606995.1 Enterobacteria phage RB5, complete genome

1-1tRNA-Arg(tct)c[67416,67491]  
cgaggcatagctcagaaggaagagcaaggaccttctaagtcctgggtcgt  
aggttcgatccctactgcctcgacca  
1-2tRNA-Asn(gtt)c[67496,67570]  
ggatgtgtagctcaatggcagagcgatcgctgttaagcgattggttata

ggttcgaatcctatcacgtccgcca  
 1-3tRNA-Tyr(gta)c[67575,67661]  
 ggggagttatcccgtagaggtagcgggtggactgtaaatccattgtcat  
 tgcgactcgggtggttcgactccatcactccccacca  
 1-4tRNA-Met(cat)c[67671,67745]  
 ggccctgtagctggaaggtcaagcaagcgcactcataatcgccagatggt  
 ggttcaattccaccaggccacca  
 1-5tRNA-Thr(tgt)c[67747,67822]  
 gctgatttagctcagtaggtagagcacctcacttgtaatgaggatgtcgg  
 cggttcgattccgtcaatcagcgcca  
 1-6tRNA-Ser(tga)c[67828,67917]  
 ggaggcgtggcagagtggtttaatgcaccggtcttgaaccggcagtcg  
 ctccggcgactcataggttcaaatcctatcgctccgcca  
 1-7tRNA-Pro(tgg)c[67919,67993]  
 ctccgtgtagctcagtttgtagagcgctgattgggatcaggaggtcc  
 aaggttcaaatccttgatggagac  
 1-8tRNA-Gly(tcc)c[68004,68077]  
 gcggatatcgataatggcattacctcagacttccaatctgatgatgtga  
 gttcgatttcattatccgctcca  
 1-9tRNA-Leu(taa)c[68083,68169]  
 gcgagaatggtaaattggtaaaggcacagcacttaaatgctgcggaat  
 gatttccttggtgggtcagtccttctcgacca  
 1-10tRNA-Gln(ttg)c[68170,68243]  
 tgggaattagccaagttgtaaggcactggatttgattccagatgcaa  
 aggttcgagtcctttattccagc

>KF148616.1 Campylobacter phage CP8, complete genome

1-1tRNA-Tyr(gta)c[38499,38584]  
 gtaagcatatgggtaattggtaaccaccagactgtaaatctggcgtctc  
 ttggcactgcaggttcgagtcctgctgttacacca  
 1-2tRNA-Arg(tct)c[38595,38671]  
 ctccatgtagctcagctggatagagcaagaatcttctaagttctaggtcg  
 ggtgttcaaatcactccatggaggcca  
 1-3tRNA-Asn(gtt)c[38681,38756]  
 tgcggattagcacagtggtagtgcaatcgactgtaaatcgatggggtcat  
 aggttcgaatcctatatccgtagcca  
 1-4tRNA-Met(cat)c[39027,39101]  
 agcagagtgcgcagtagtagcgtgctgggtcataaccagatgtcgta  
 ggtgcaaatcctacctctgtaacca  
 1-5tRNA-Leu(taa)c[39107,39184]  
 tggacatgtagcgctcaagtggtagagcagccgacttaaatctgcagat  
 tgatggttcgatcccatccatgtccaac  
 1-6tRNA-Met(cat)c[39189,39263]  
 gggcgagtagctcaatggtagagcaaccggctcataaccggttggttata  
 ggttcgattcctatttcgccacca

>KF156339.1 *Synechococcus* phage S–MbCM25, complete genome

1–1tRNA–Leu(taa)[17219,17305]

tgggagtggtggcggaatcggtagacgcaccagacttaaaatctgttgaga  
attaatctcgtgggagttcaagtcctcctactcccat

1–2tRNA–Thr(tgt)[19060,19132]

gcctccgtagctcagttggtagagcagggtctttgtaaagctcaggtcgca  
agttcaaatctgtcagaggctc

1–3tRNA–Asn(gtt)[19137,19209]

tcctctatagctcagttggtagagcaggtagctgttaatcacctgtccc  
tggttcgagtcagggtggaggag

1–4tRNA–Arg(tct)[158217,158291]

tgggtcagtagctcagcggatagagccacgcacttctaatacggttggtcg  
cagggttcgattcctgcctgactcgt

>KJ586794.1 *Listeria* phage LMTA–34, complete genome

1–1tRNA–Met(cat)c[41701,41774]

ttgtcccgtagctagaaggctcgagcaaggagctcataactcctcggtttg  
ggttcgattcccaacggggcaatc

1–2tRNA–Pro(tgg)c[42667,42741]

cagggtgtagctcagtttggttagagtacccgctttggagacgggaagtc  
gtagggtcgaatcctaccaccttga

1–3tRNA–Arg(tct)c[43859,43929]

gtccttatggtgtagtggtatgcacaagggttctactcccttagcgcgg  
gttcgaatcctgctgaggact

1–4tRNA–Gly(tcc)c[44176,44246]

gcggttagtagtataagggtagtagtaccgaaggttccaacctgtagtgggg  
gttcgaatccccctaccgct

1–5tRNA–Asn(gtt)c[44315,44388]

gtgtccttaactcagaggtcagagtgccgtcctgtaagtcggaagtcgc  
tggttcaaatccagcaggatacgc

1–6tRNA–Ser(tga)c[44626,44717]

ggaaggttggtagagcttggtatacgtagcttgaaactagcttacc  
cttgaatacagggtacaagggttcgaatcccttaccttct

1–7tRNA–Phe(gaa)c[44730,44801]

gtagtctagctgagatggattagcgttgcttgaaaagcaagagaggca  
ggttcgatacctgcggactcca

1–8tRNA–Lys(ttt)c[44807,44878]

ggagttatggtgaaatggctatcactgcgggtttttaccccggtattcta  
ggttcgaatcctagtggtcca

1–9tRNA–Tyr(gta)c[45202,45283]

gtgtcattcgcatagtggaattgcaggggactgtaactccccctcccttc  
ggggtccaaggttcgagtccttgatggcgca

1–10tRNA–Leu(tag)c[45644,45728]

tgccgagatggtggaactggtatacacggtagacttagaatctgctgtcc  
caaggatatgtgggttcgaatcccactctcggtat

1-11tRNA-Asp(gtc)[46194,46266]  
gtgcgtatgatataatggctattatactcgactgtctatcgagaaatagg  
ggttcgattccccttacgtgcgc  
1-12tRNA-Ile(gat)[46370,46442]  
gccagcatagcttagtaggcaaagcaaccgaccgataatcggtagtcctt  
ggtcaattccaagtgttggtac  
1-13tRNA-Ser(gct)[46619,46705]  
ggagagttgtcagagaggcttaatgatacgggttgctaactcgttgact  
agtaatagtagcaagggttcgaatcccttactctcct  
1-14tRNA-Cys(gca)[46785,46855]  
gcgggtataaccaactggaaaggtagtagactgcaaatctacgtatatgg  
gttcaattcccattacccgct

>KJ591605.1 Listeria phage LMTA-57, complete genome

1-1tRNA-Cys(gca)[110865,110935]  
gcgggtataaccaactggaaaggtagtagactgcaaatctacgtatatgg  
gttcaattcccattacccgct  
1-2tRNA-Ser(gct)[111015,111101]  
ggagagttgtcagagaggcttaatgatacgggttgctaactcgttgact  
agtaatagtagcaagggttcgaatcccttactctcct  
1-3tRNA-Ile(gat)[111278,111350]  
gccagcatagcttagtaggcaaagcaaccgaccgataatcggtagtcctt  
ggtcaattccaagtgttggtac  
1-4tRNA-Asp(gtc)[111454,111526]  
gtgcgtatgatataatggctattatactcgactgtctatcgagaaatagg  
ggttcgattccccttacgtgcgc  
1-5tRNA-Leu(tag)[111992,112076]  
tgccgagatggtggaactggtatacacggtagacttagaatctgctgtcc  
caaggatatgtgggttcgaatcccactctcgggat  
1-6tRNA-Tyr(gta)[112437,112518]  
gtgtcattcgcatagtggaattgcaggggactgtaactcccctcccttc  
ggggtccaaggttcgagtccttgatggcgca  
1-7tRNA-Lys(ttt)[112842,112913]  
ggagttatggtgaatggctatcactgcgggttttaccctgtattcta  
ggttcgaatcctagtggtcca  
1-8tRNA-Phe(gaa)[112919,112990]  
gtagtcctagctgagatggattagcgcttgcttgaaaagcaagagaggca  
ggttcgatacctgcggactcca  
1-9tRNA-Ser(tga)[113003,113094]  
ggaaggttggtagagcttgtaatacgtagcttgaaaactagcttacc  
cttgaatacagggtacaagggttcgaatcccttactctcct  
1-10tRNA-Asn(gtt)[113332,113405]  
gtgtccttaactcagaggtcagagtgccgtcctgttaagtcggaagtcgc  
tgggtcaatccagcaggatacgc  
1-11tRNA-Gly(tcc)[113474,113544]

gcgggtatagtataaggtagtacccaaggtttccaacatgtagtggg  
 gttcgaatccccctaccgct  
 1-12tRNA-Arg(tct)[113791,113861]  
 gtccctatggtagtagtgatgcacaagggttttactcccttagcgcgg  
 gttcgaatcctgctgaggact  
 1-13tRNA-Pro(tgg)[114979,115053]  
 cagggtgtagctcagtttggttagagtacccgctttggagacgggaagtc  
 gtaggttcgaatcctaccacctga  
 1-14tRNA-Met(cat)[115946,116019]  
 ttgtcccgtagctagaaggctcgagcaaggagctcataactcctcggttg  
 ggttcgattcccaacggggcaatc  
 >KJ586795.1 Listeria phage LMTA-94, complete genome  
 1-1tRNA-Cys(gca)[100460,100530]  
 gcgggtataaccaactggaaaggtagtagactgcaaactacgtatatgg  
 gttcaattcccattaccgct  
 1-2tRNA-Ser(gct)[100610,100696]  
 ggagagttgtcagagaggcttaatgatacgggttgctaactcgtgtact  
 agtaatagtagcaagggttcgaatcccttactctcct  
 1-3tRNA-Ile(gat)[100885,100957]  
 accgcatagcttagtaggcaaagcaaccgaccgataatcggtagtcctt  
 ggttcaattccaagttggtac  
 1-4tRNA-Asp(gtc)[101062,101134]  
 gtgcgtatgatataatggctattatactcgactgtctatcgagaagtagg  
 ggttcgattccccttacgtgcgc  
 1-5tRNA-Leu(tag)[101600,101684]  
 tgccgagatgggtggaactggatatacaggtagacttagaatctgctgtcc  
 caaggatatgtgggttcgaatcccactctcggtat  
 1-6tRNA-Tyr(gta)[102045,102126]  
 gtgtcattcgcatagtggaattgcaggggactgtaactcccctcccttc  
 ggggtccaaggttcgagtccttgatggcgca  
 1-7tRNA-Lys(ttt)[102450,102521]  
 ggagttatggtgaaatggctatcactgcgggtttttaccccggtattcta  
 ggttcgaatcctagtggtcca  
 1-8tRNA-Phe(gaa)[102527,102598]  
 gtagtcctagctgagatggattagcgttgcttgaaaagcaagagaggca  
 ggttcgatacctgcggactcca  
 1-9tRNA-Ser(tga)[102611,102702]  
 ggaaggttggttagagcttggttaatacgtagcttgaaaactagcttacc  
 cttagaatacagggtacgaggttcaaatcccttacctcct  
 1-10tRNA-Asn(gtt)[103223,103296]  
 gtgtccttaactcagaggtcagagtgccgtcctgttaagtcggaagtcgc  
 tggttcaaacccagcaggatacgc  
 1-11tRNA-Gly(tcc)[103365,103435]  
 gcgggtatagtataaggtagtacccaaggtttccaacatgtagtggg

gttcgaatccctctacccgct  
1-12tRNA-Arg(tct)[103693,103763]  
gtccttatggtgtagtggatgcacaaggatttctactcccttagcgcgg  
gttcgaatcctgctgaggact  
1-13tRNA-Pro(tgg)[104882,104956]  
cagggtgtagctcagtttggtagagtacccgcttggagacgggaagtc  
gtaggttcgaatcctaccacctga  
1-14tRNA-Met(cat)[105850,105923]  
ttgtcccgtagctagaaggctcgagcaaggagctcataactcctcggtttg  
ggttcgattcccaacggggcaatc

>KT919972.1 *Vibrio* phage phi-Grn1, complete genome

1-1tRNA-Ser(gct)c[37085,37173]  
ggagatatggtctaaaggtatgacagcaccctgctaagggtcggacgtt  
aatagcgttctctgagttcgaatctcagtatctccgcca  
1-2tRNA-Leu(caa)c[37614,37690]  
gcccaactagtagccaattggcagaggcactagttcaaacactaggagttc  
cgagttcgaatctcgggttgggcacca  
1-3tRNA-Leu(taa)c[37807,37883]  
gcgcacttggccaattggcagaggcatgaggctaaaatctcagggatg  
cggttcgaatccgcccgtgcgtacca  
1-4tRNA-Cys(gca)c[37886,37959]  
gctcgaatcgataatggaagtatgacggattgcaaatccgcaggtcagg  
gttcgattccctgttcgagctcca  
1-5tRNA-His(gtg)c[37972,38048]  
gtggcagtggtgaagtggaaataccccgggttgtattccggaagatg  
cgggttcgatccccgtctgtcacccca  
1-6tRNA-Val(tac)c[38440,38513]  
ggtcccttagtataatggcagtagctcttttacacagagaagaagtg  
gctcgattccactagggactacca  
1-7tRNA-Gly(tcc)c[38520,38593]  
gcgggtatgatgtaatggtagcatgacgtcctccaagtcgttcgtctcg  
gttcgagtcctgtatcccgctcca  
1-8tRNA-Met(cat)c[38783,38858]  
ggtgatgtagctcaagtggcagagcaacgcttcatacggcgtaagatcc  
gatttcgagtatcgggtgtcacctcca  
1-9tRNA-Arg(tct)c[39383,39458]  
gcgctgtagctcaattggaagacacgtcccttctaaggatggggttat  
gagttcgaatctcatacggcgtgccca  
1-10tRNA-Thr(tgt)c[40180,40254]  
gctcctgaagcattgatggcgtgcagcggcttctaaccgcagaattc  
ggttcgattccgaacgggagcacca  
1-11tRNA-Gln(ttg)c[40384,40457]  
tggggattggtgtaaaggcagcataacgtactttgaatgcgttggtatca  
gttcgaatctgttatccccagcca

1-12tRNA-Asp(gtc)c[40477,40552]  
ggagccgaggtgtaaaaggtgcatgtctccctgtcacggagaaggtagc  
gggttcgaaacccgtcggttccgcca  
1-13tRNA-Asn(gtt)c[40622,40697]  
gcttcattaactcagttggtagagtgtctgactgttaatcagagagtcgt  
tggttcagagtcgaacatgaagcgcca  
1-14tRNA-Asn(gtt)c[40699,40773]  
gggtgtgtaactcagagcagagtagcaagctgttaactgcaagtcgag  
atttcgaaattctccacgcccgcga  
1-15tRNA-Trp(cca)c[40849,40922]  
aggggcatgatgtaaaggcagcatgacggattccaaacccgttcgttaga  
gttcgaatctctatgcccctgcca  
1-16tRNA-Ile(gat)c[40929,41002]  
agtcccttagctcaacggtagagcgtgcgaccgataatcgcttgtaaga  
gttcgattctcttagggactacca  
1-17tRNA-Ser(tga)c[41066,41151]  
gaaagattctggtagcggcaacggcttgaaaaccgtcggtcaccggga  
ggtagatttagggttcgaatccctagttctccgcca  
1-18tRNA-Met(cat)c[41176,41249]  
ttgcgggtagagcagtggtcagctcgtgagtttcataagctcaagtcg  
ttggttcgaatccagcccacgca  
1-19tRNA-Tyr(gta)c[41351,41436]  
ggagcgtacgtctcaaggtgagacaggggactgtaatccctgaccctta  
acgggtagagaggttcgattcctctacgtccacca  
1-20tRNA-Glu(ttc)c[41443,41517]  
tctcccgtggactaacggtaggtcatcacccittcaagtgaaagtcgcg  
agttcgaatctcgtcgggagaacca  
1-21tRNA-Lys(ttt)c[41581,41657]  
gcgtcggtagctcatcatggaagagcaggagcttttaactctcaggtgt  
ctggttcgagtcagggcgcgctacca  
1-22tRNA-Lys(ttt)c[41669,41742]  
gggtctatgatgtaacggtagcatatgggacttttaatccctcagtaga  
gttcgaatctctgtggaccacca  
1-23tRNA-Phe(gaa)c[41749,41823]  
gcacccttagcttatcaggaagcggcgattgaagtcgcgagtcgtc  
ggttcgattccgaggggtgcacca  
1-24tRNA-Leu(tag)c[41825,41902]  
gcgcaagtagcccaatctggcagaggcactggcttagaaaccagaagtt  
aagagttcgaatctcttctgcgtacca  
1-25tRNA-Arg(acg)c[42449,42524]  
gcccgattagctcaattggaagagcagcgccctacgaaggcgaaggttac  
aagttcgaatctgtattgggtgcca  
1-26tRNA-Pro(tgg)c[42533,42609]  
ccgtgactagctcaatctggtagagtactccgtttggggcggaagtta



agcgttcgaatcgctgtcacggacca  
1-27tRNA-Pro(tgg)c[42619,42692]  
cgggacgtggcgtaaaggtagcgttcgcttgggagcatgtggaaga  
gttcgagtctcttcgtcccacca  
1-28tRNA-Met(cat)c[44869,44946]  
ggccctatagctcaacacggtagagcaaccgactcataatcggtaggtt  
acaggttcgagtcctgttggggcacca

>KT919973.1 *Vibrio* phage phi-ST2, complete genome

1-1tRNA-Ser(gct)c[98264,98352]  
ggaagcatggtctaaaggtatgacagcaccctgctaaggtgcggacgtt  
aatagcgttctctgggttcgattcccagtgcttccgcca  
1-2tRNA-Leu(caa)c[98521,98597]  
gcccactagttccaattggcagaggcactagttcaaacactaggagttc  
cgagttcgaatctcgggttgggcacca  
1-3tRNA-Leu(taa)c[98714,98790]  
gcgcacgtgggtccaattggcagaggcatgaggcttaaaatctcagggatg  
cggttcgaatccgccgtgcgtacca  
1-4tRNA-Cys(gca)c[98793,98866]  
gctcgaatcgataatggaagtatgacggattgcaaatccgcaggtcagg  
gttcgattccctgttcgagctcca  
1-5tRNA-His(gtg)c[98879,98955]  
gtggcagtggtgaagtggaaataccccgggtgtgattccggaagatg  
cgggttcgatccccgtctgtcacccca  
1-6tRNA-Val(tac)c[99371,99444]  
gttccttagtataatggcagtagctctctttacacagagaagaagtg  
gctcgattccactagggactacca  
1-7tRNA-Gly(tcc)c[99451,99524]  
gcgggtatgatgtaatggtagcatgacgtcctccaagtcgttcgtctcg  
gttcgagtcggtgtacccgctcca  
1-8tRNA-Met(cat)c[99714,99789]  
ggtgatgtagctcaagtggcagagcaacgcttcatacggcgtaagatcc  
gatttcgagtatcgggtgcacctcca  
1-9tRNA-Arg(tct)c[100314,100389]  
gcgctgttagctcaattggaagagcacgtcccttctaaggatggggttat  
gagttcgaatctcatacggcgtgcca  
1-10tRNA-Thr(tgt)c[100780,100855]  
gccctgatagcacaactggcagtgagctcacttgtaatgagcaggttcg  
cgggttcgaatccgtgcagggcacca  
1-11tRNA-Gln(ttg)c[100983,101056]  
tggggattggtgtaaaggcagcataacgtactttgaatgcgttggtatca  
gttcgaatctgttatcccagcca  
1-12tRNA-Asp(gtc)c[101076,101151]  
ggagccgaggtgtaagtgttgcatgtctccctgtcacggagaaggtagc  
gggttcgaaaccgtcgggtccgcca

1-13tRNA-Asn(gtt)c[101220,101295]  
 ggatcgctaactcaatggtagagtgctgcctgtaagcgaggagttcc  
 gattcagatctcggcggtccgcca  
 1-14tRNA-Trp(cca)c[101371,101444]  
 aggggcatgatgtaaaggcagcatgacggattccaaacccgttcgtaga  
 gttcgaatctctatgcccctgcca  
 1-15tRNA-Ile(gat)c[101451,101524]  
 agtcccttagctcaacggtagagcgtgcgaccgataatcgcttggttaaga  
 gttcgattctcttagggactacca  
 1-16tRNA-Ser(tga)c[101589,101674]  
 gagagattctggtagcggcaacggcttgaaaaccgtcggtcaccggga  
 ggtgatgttagggtcgaatccctagtcttccgcca  
 1-17tRNA-Met(cat)c[101987,102060]  
 ttgccccgtagagaagtggtcatctcgtcggctcataagccggagaacg  
 ctggttcgaatccagccccacgca  
 1-18tRNA-Tyr(gta)c[102162,102247]  
 ggagcgtagctctcaagtgagacaggggactgtaaatccctgaccctta  
 acgggtagagaggttcgattcctctacgtccacca  
 1-19tRNA-Glu(ttc)c[102254,102328]  
 tctccgtggactaacggtaggtcatcacccttcaaggtgaagtgcgcg  
 agttcgaatctcgtcgggagaacca  
 1-20tRNA-Lys(ttt)c[102392,102468]  
 gcgtcggtagctcatcatggaagacagggagctttaactctcaggtgt  
 ctggttcgagtccagggcggcgtagcca  
 1-21tRNA-Phe(gaa)c[102480,102554]  
 gcacccttagcttatcaggaagcggcggttggaagtcgagtcgtc  
 ggttcgattccgaggggtgcacca  
 1-22tRNA-Leu(tag)c[102556,102632]  
 gcgcaagtagcccaattggcagaggcactggtcttagaaaccagaagtta  
 agagttcgaatctcttctgcgtacca  
 1-23tRNA-Arg(acg)c[102987,103062]  
 gcccgattagctcaattggaagagcagcgccctacgaaggcgaaggttac  
 aagttcgaatctgtattgggtgcca  
 1-24tRNA-Pro(tgg)c[103071,103147]  
 ccgtgactagctcaatctggttagagtactccgttggggcggagaagtta  
 agcgttcgaatcgcttgacggacca  
 1-25tRNA-Pro(tgg)c[103157,103230]  
 cgggacgtggcgtaaaggtagcgttcgttgggagcatgtggttaaga  
 gttcgagtctctcgtcccgacca  
 1-26tRNA-Met(cat)c[105074,105151]  
 ggcctatagctcaacttggttagagcaaccgactcataatcggtaggtt  
 acaggttcgagtcctgttgggtcacca

>KU130127.1 Pseudomonas phage vB\_PsyM\_KIL2, complete genome

1-tRNA-Ser(tga)[15801,15895]

ggcttggttaagccgagatggcctagcggcagcggtcttgaaaaccgaagg  
 ttcacggaagtggacgtgtgagttcgagctcacccaatccgcca  
 1-2tRNA-Met(cat)[15902,15978]  
 tggccttagcataattggttaatgcaatcaactcataattgataagata  
 cgagttcaagtctcgtggggccaacca  
 1-3tRNA-Arg(tct)[16549,16625]  
 atctccatagctcaactggacagagcaagggtcttctacaccaaggttg  
 agggttcaagtccttctggggatacca  
 1-4tRNA-Thr(tgt)[16960,17036]  
 gcccgtttagctccaattggtagagcgctgtcttgaatcaggatgtt  
 gcgggtcgaatccgtaaatgggcacca  
 1-5tRNA-Arg(acg)[17136,17210]  
 agtcgcttggccgattggattaggcaaaggtccacgaagcctgctagagt  
 ggttcgactccactagtactacca  
 1-6tRNA-Asn(gtt)[17451,17536]  
 tggcgtgtaagcataatggtagcactccgctgttaacggagcttccga  
 aaggtcttttaggttcgagtcctaccgcgtcagcca  
 1-7tRNA-Pro(tgg)[17804,17877]  
 ctctcgaagcgttacggtagcgtactctgttgaacgaagtggcggtg  
 gttcgactccacccgaggtgacca  
 1-8tRNA-Leu(tag)[17938,18021]  
 gcccttgtgatgaaatggtagacgtgccgggttagattccggtgtcgaa  
 aggcgtgtcgggttcgagtcgactgagggcacca  
 1-9tRNA-Gly(tcc)[18508,18582]  
 gcgggtataactcagaggcagagtgacgcctccaagctgttcgtcggg  
 atttcgaaattccctatccgctcca

>KU130128.1 Pseudomonas phage vB\_PsyM\_KIL3, complete genome

1-1tRNA-Ser(tga)[16011,16105]  
 ggcttggttaagccgagatggcctagcggcagcggtcttgaaaaccgaggg  
 ttcacggaagtggacgtgtgagttcgagctcacccaatccgcca  
 1-2tRNA-Met(cat)[16112,16188]  
 tggccttagcataattggttaatgcaatcaactcataattgataagata  
 cgagttcaagtctcgtggggccaacca  
 1-3tRNA-Arg(tct)[16759,16835]  
 atctccatagctcaactggacagagcaagggtttctacaccaaggttg  
 agggttcgaatccttctggggatacca  
 1-4tRNA-Thr(tgt)[17460,17535]  
 gccggaatagcacaattggtagtcagtcgccttgaagcgaaggttga  
 gggttcaagtcctttttcggcacca  
 1-5tRNA-Arg(acg)[17725,17799]  
 agtcgcttggccgattggattaggcaaaggtccacgaagcctgctagagt  
 ggttcgactccactagtactacca

>KU130131.1 Pseudomonas phage vB\_PsyM\_KIL3b, complete genome

1-1tRNA-Ser(tga)[16018,16112]

ggcttggttaagccgagatggcctagcggcagcggcttgaaaaccgaggg  
ttcacggaagtggacgtgtgagttcagctcacccaatccgcca  
1-2tRNA-Met(cat)[16119,16195]  
tggccttagcataattggttaatgcaatcaactcataattgataagata  
cgagttcaagtctcgtggggccaacca  
1-3tRNA-Arg(tct)[16766,16842]  
atctccatagctcaactggacagagcaagggtttctacaccaaggttg  
agggttcgaatccttctggggatacca  
1-4tRNA-Thr(tgt)[17467,17542]  
gccggaatagcacaattggtagtcagtcgccttgtaagcgaaggttga  
gggttcaagtcctttttcggcacca  
1-5tRNA-Arg(acg)[17732,17806]  
agtcgcttggccgattggattaggcaaaggtccacgaagcctgctagagt  
ggttcgactccactagtactacca

>KU130129.1 Pseudomonas phage vB\_PsyM\_KIL4, complete genome

1-1tRNA-Ser(tga)[15590,15684]  
ggcttggttaagccgagatggcctagcggcagaggtcttgaaaaccgaagg  
ttcacggaagtggacgtgtgagttcagctcacccaatccgcca  
1-2tRNA-Met(cat)[15691,15767]  
tggccttagcataattggttaatgcaatcaactcataattgataagata  
cgagttcaagtctcgtggggccaacca  
1-3tRNA-Arg(tct)[16339,16415]  
atctccatagctcaactggacagagcaagggtcttctacaccaaggttg  
agggttcaagtccttctggggatacca  
1-4tRNA-Thr(tgt)[16750,16826]  
gcccgttagctccaattggtagagcgcctgtctgtaatcaggatgtt  
gcggttcgaatccgtaaatgggcacca  
1-5tRNA-Arg(acg)[16926,17000]  
agtcgcttggccgattggattaggcaaaggtccacgaagcctgctagagt  
ggttcgactccactagtactacca  
1-6tRNA-Asn(gtt)[17241,17326]  
tggcgtgtaagcataatggtactgcactccgctgtaacggagcttccga  
aaggtcttttaggttcgagtcctaccgctcagcca  
1-7tRNA-Pro(tgg)[17594,17667]  
ctcctcgaagcgttacggtagcgtacttcgttggaaacgaagtggcgggtg  
gttcgactccacccgaggtgacca  
1-8tRNA-Leu(tag)[17728,17811]  
gcccttgtgatgaaatggtagacgtgccgggttagattccggtgtcgaa  
aggcgtgtcgggttcgagtcgactgagggcacca  
1-9tRNA-Gly(tcc)[18298,18372]  
gcgggtataactcagaggcagagtgtagccttccaagctgttcgtcggg  
atttgaaattccctatccgtcca  
1-10tRNA-Arg(cct)[91361,91454]  
gaggcgatggaagaggtaatgttcatcaaattcctagtgtggtggtcgat

cacattcatagggatagcagtggttctagtcttcattgactgac  
>KU130130.1 Pseudomonas phage vB\_PsyM\_KIL5, complete genome

1-1tRNA-Ser(tga)[15507,15601]  
ggcttggaagccgagatggcctagcggcagcggcttgaaaaccgaggg  
ttcacggaagtggacgtgtgagttcgagtcacccaatccgcca  
1-2tRNA-Met(cat)[15608,15684]  
tggccttagcataattggttaatgcaatcaactcataattgataagata  
cgagttcaagtctcgtggggccaacca  
1-3tRNA-Arg(tct)[16255,16331]  
atctccatagctcaactggacagagcaagggtttctacaccaaggttg  
agggttcgaatccttctggggatacca  
1-4tRNA-Thr(tgt)[16666,16742]  
gcccgttttagctccaattggtagagcgcctgtcttgaatcaggatgtt  
gcggttcgaatccgtaaatgggcacca  
1-5tRNA-Arg(acg)[16842,16916]  
agtcgcttggccgattggattaggcaaaggtccacgaagcctgctagagt  
ggttcgactccactagtactacca  
1-6tRNA-Asn(gtt)[17157,17242]  
tggcgtgaagcataatggtactgcactccgctgttaacggagcttccga  
aaggtcttttaggttcgagtcctaccgcgtcagcca  
1-7tRNA-Pro(tgg)[17510,17583]  
ctctcgaagcgttacggtagcgtactcgttggaaacgaagtggcgggtg  
gttcgactccacccgaggtgacca  
1-8tRNA-Leu(tag)[17644,17727]  
gcccttgtgatgaaatggtagacgtgccgggttagattccggtgtcgaa  
aggcgtgtcgggttcgagtcgactgagggcacca  
1-9tRNA-Gly(tcc)[18214,18288]  
gcgggtataactcagaggcagagtgtagccttccaagctgttcgtcggg  
atttcgaaattccctatccgtcca  
1-10tRNA-Arg(cct)[91930,92023]  
gaggcgatggaagaggtaatgttcatcaaattcctagtgtggtggtcgat  
cacattcatagggatagcagtggttctagtcttcattgactgac

>KX397370.1 Erwinia phage vB\_EamM\_Machina, complete genome

1-1tRNA-Trp(cca)[883,959]  
gggggagtagttcaattggcgagagcgtcggattccaaatccggttgttg  
caggttcgagtcctgtctcccctgcca  
1-2tRNA-Cys(gca)[1281,1354]  
ggggcgctggccgagtggttaggcgctggattgcaaatcctgttaccgcg  
gttcgattccgcggcgtccctcca  
1-3tRNA-Tyr(gta)[4114,4199]  
ggcgggttactcaagcggtaacgagagcagactgtaaatctgttcctt  
cgggcttcgtaggttcaaatccttcacacgccacca  
1-4tRNA-Asp(gtc)[4501,4576]  
ggtgctatcgtctagtggccgaggatactaccctgtcacggtagagaccg

gagttcgattctccgtagcaccgccca  
1-5tRNA-Ile(gat)[4585,4660]  
tgcgtcttagctcagttggtagagcgacccctgataagggtgaggccac  
tggttcaagtcagtagatgcaacca  
1-6tRNA-Glu(ttc)[4668,4744]  
attcccgatctagttgggtccaggatacgacactttcactgtcgggtaca  
cgagttcaaatctcgtcgggaatacca  
1-7tRNA-Ser(gct)[4750,4840]  
agagaattgactgagttggtttaagggtctcccctgctaaggaggtgat  
gcgaaagtgtaccattggttcgaatccaatattctctgccca  
1-8tRNA-Ile(aat)[5305,5398]  
tggctccgtagctaaatcggtagaggcagactttaattagttctccaacg  
attttataatcgctggtgtaggttcaagtcctaccggagcaag  
1-9tRNA-Asn(gtt)[5482,5557]  
gactctgtagttcagttggtagaacggtggactgttaatccatatgtcgc  
agggtcagtcctgccagagtcgccca

>KX397371.1 Erwinia phage vB\_EamM\_Parshik, complete genome

1-1tRNA-Trp(cca)[883,958]  
gggggtatagttcaattggcagaatgtcgggtctccaaaaccgaaggttcg  
agggtcagacctcgtgcccccgcca  
1-2tRNA-Tyr(gta)[4229,4314]  
ggcgggttactcaagcggtaacgagagcagactgtaaatctgttcctt  
cgggcttcgtaggttcaaactcttcacacgccacca  
1-3tRNA-Asp(gtc)[4616,4691]  
ggtgctatcgtctagttggccgaggatactaccctgtcacggtagagaccg  
gagttcgattctccgtagcaccgccca  
1-4tRNA-Ile(gat)[4700,4775]  
tgcgtcttagctcagttggtagagcgctcccctgataaggagaggtcac  
tggttcaagtcagtagatgcaacca  
1-5tRNA-His(gtg)[4783,4860]  
gtgtatgtagttcagttggttagaattctggcttgtagcgtcagaggtcg  
tgaggtcgaatctcccatacacccca  
1-6tRNA-Asp(gtc)[4868,4944]  
agtgtgtagtgcagcggtttaagacgcctgcctgtcacgtaggagatcg  
tgggttcaaatcccatcagcactgccca  
1-7tRNA-Glu(ttc)[4951,5027]  
attcccgatctagttgggtccaggatacgacactttcactgtcgggtaca  
cgagttcgaatctcgtcgggaatacca  
1-8tRNA-Ser(gct)[5033,5123]  
agagaattgactgagttggtttaagggtctcccctgctaaggaggtgat  
gcgaaagtgtaccattggttcgaatccaatattctctgccca  
1-9tRNA-Ile(aat)[5588,5681]  
tggctccgtagctaaatcggtagaggcagactttaattagttctccaacg  
attttataatcgctggtgtaggttcaagtcctaccggagcaag

1-10tRNA-Asn(gtt)[5765,5840]  
 gactctgtagttcagttggtagaacggtggactgttaatccatatgtcgc  
 aggttcgagtcctgccagagtcgcca  
 >KM606999.1 Enterobacteria phage RB10, complete genome  
 1-1tRNA-Arg(tct)c[67423,67498]  
 cgaggcatagctcagaaggaagagcaaggaccttctaagtcctgggtcgt  
 aggttcgatccctactgcctcgacca  
 1-2tRNA-Asn(gtt)c[67503,67577]  
 ggatgtgtagctcaatggcagagcgatcgctgttaagcgattgggtata  
 ggttcgaatcctatcacgtccgcca  
 1-3tRNA-Tyr(gta)c[67582,67668]  
 ggggagttatcccgtagaggtagcggtgtggactgtaaatccattgtcat  
 tgcgactcgggtggttcgactccatcactccccacca  
 1-4tRNA-Met(cat)c[67678,67752]  
 ggccctgtagctggaaggttaagcaagcgactcataatcgccagatggt  
 ggttcaattccaccagggccacca  
 1-5tRNA-Thr(tgt)c[67754,67829]  
 gctgatttagctcagtaggtagagcacctcacttgaatgaggatgtcgg  
 cggttcgattccgtcaatcagcgcca  
 1-6tRNA-Ser(tga)c[67835,67924]  
 ggaggcgtggcagagtggtttaatgcaccggtcttgaaaaccggcagtcg  
 ctccggcgactcataggttcaaactctatcgctccgcca  
 1-7tRNA-Pro(tgg)c[67926,68000]  
 ctccgtgtagctcagtttggtagagcgctgattgggatcaggaggtcc  
 aaggttcaaatccttgatggagac  
 1-8tRNA-Gly(tcc)c[68011,68084]  
 gcggatatgtataatggcattacctcagacttccaatctgatgatgtga  
 gttcgattctcattatccgctcca  
 1-9tRNA-Leu(taa)c[68090,68176]  
 gcgagaatgggtcaaattggtaaaggcacagcacttaaaatgctgcggaat  
 gatttccttggtggttcgagtccttctcgacca  
 1-10tRNA-Gln(ttg)c[68177,68250]  
 tgggaattagccaagttggttaaggcactggattttgattccaggatgcaa  
 aggttcgagtcctttattcccagc  
 >KM606996.1 Enterobacteria phage RB6, complete genome  
 1-1tRNA-Arg(tct)c[67416,67491]  
 cgaggcatagctcagaaggaagagcaaggaccttctaagtcctgggtcgt  
 aggttcgatccctactgcctcgacca  
 1-2tRNA-Asn(gtt)c[67496,67570]  
 ggatgtgtagctcaatggcagagcgatcgctgttaagcgattgggtata  
 ggttcgaatcctatcacgtccgcca  
 1-3tRNA-Tyr(gta)c[67575,67661]  
 ggggagttatcccgtagaggtagcggtgtggactgtaaatccattgtcat  
 tgcgactcgggtggttcgactccatcactccccacca

1-4tRNA-Met(cat)c[67671,67745]  
ggccctgtagctggaaggtcaagcaagcgactcataatcgccagatggt  
ggtcaattccaccagggccacca  
1-5tRNA-Thr(tgt)c[67747,67822]  
gctgatttagctcagtaggtagagcacctcacttgtaatgaggatgtcgg  
cggttcgattccgtcaatcagcgcca  
1-6tRNA-Ser(tga)c[67828,67917]  
ggaggcgtggcagagtggtttaatgcaccggtcttgaaaaccggcagtcg  
ctccggcgactcataggttcaaatcctatcgctccgcca  
1-7tRNA-Pro(tgg)c[67919,67993]  
ctccgtgtagctcagtttggtagagcgctgattgggatcaggagggtcc  
aaggttcaaatccttgatggagac  
1-8tRNA-Gly(tcc)c[68004,68077]  
gcggatatcgataatggcattacctcagactccaatctgatgatgtga  
gttcgattctcattatccgtcca  
1-9tRNA-Leu(taa)c[68083,68169]  
gcgagaatggtcaaattggtaaaggcacagcacttaaatgctgcggaat  
gatttccttggtggttcgagtccttctcgacca  
1-10tRNA-Gln(ttg)c[68170,68243]  
tgggaattagccaagttgtaaggcactggatttgattccaggatgcaa  
agggtcagtcctttattcccagc

>KM606998.1 Enterobacteria phage RB9, complete genome

1-1tRNA-Arg(tct)c[67417,67492]  
cgaggcatagctcagaaggaagagcaaggaccttaagtctgggtcgt  
aggttcgatccctactgcctcgacca  
1-2tRNA-Asn(gtt)c[67497,67571]  
ggatgtgtagctcaatggcagagcgatcgctgtaagcgattggtata  
ggttcgaatcctatcacgtccgcca  
1-3tRNA-Tyr(gta)c[67576,67662]  
ggggagtatcccgtagaggtagcgggtggactgtaaatccattgtcat  
tgcgactcgggtggttcgactccatcactccccacca  
1-4tRNA-Met(cat)c[67672,67746]  
ggccctgtagctggaaggtcaagcaagcgactcataatcgccagatggt  
ggtcaattccaccagggccacca  
1-5tRNA-Thr(tgt)c[67748,67823]  
gctgatttagctcagtaggtagagcacctcacttgtaatgaggatgtcgg  
cggttcgattccgtcaatcagcgcca  
1-6tRNA-Ser(tga)c[67829,67918]  
ggaggcgtggcagagtggtttaatgcaccggtcttgaaaaccggcagtcg  
ctccggcgactcataggttcaaatcctatcgctccgcca  
1-7tRNA-Pro(tgg)c[67920,67994]  
ctccgtgtagctcagtttggtagagcgctgattgggatcaggagggtcc  
aaggttcaaatccttgatggagac  
1-8tRNA-Gly(tcc)c[68005,68078]



gcggatatcgataatggcattacctcagacttccaatctgatgatgtga  
gttcgattctcattatccgctcca  
1-9tRNA-Leu(taa)c[68084,68170]  
gcgagaatgggtcaaattggtaaaggcacagcacttaaaatgctgcggaat  
gatttccttgtgggttcgagtccttctcgacca  
1-10tRNA-Gln(ttg)c[68171,68244]  
tgggaattagccaagttggttaaggcactggattttgattccaggatgcaa  
aggttcgagtcctttattcccagc

>KM606997.1 Enterobacteria phage RB7, complete genome

1-1tRNA-Arg(tct)c[67417,67492]  
cgaggcatagctcagaaggaagagcaaggaccttctaagtcctgggtcgt  
aggttcgatccctactgcctcgacca  
1-2tRNA-Asn(gtt)c[67497,67571]  
ggatgtgtagctcaatggcagagcgatcgctgttaagcgattgggtata  
ggttcgaatcctatcacgtccgcca  
1-3tRNA-Tyr(gta)c[67576,67662]  
ggggagtatcccgtagaggtagcgggtggactgtaaatccattgtcat  
tgcgactcgggtggttcgactccatcactccccacca  
1-4tRNA-Met(cat)c[67672,67746]  
ggccctgtagctggaaggtcaagcaagcgactcataatcgccagatggt  
ggttcaattccaccagggccacca  
1-5tRNA-Thr(tgt)c[67748,67823]  
gctgatttagctcagtaggtagagcacctcacttgaatgaggatgtcgg  
cggttcgattccgtcaatcagcgcca  
1-6tRNA-Ser(tga)c[67829,67918]  
ggaggcgtggcagagtggtttaatgcaccggtctgaaaaccggcagtcg  
ctccggcgactcataggttcaaatcctatcgctccgcca  
1-7tRNA-Pro(tgg)c[67920,67994]  
ctccgtgtagctcagtttgtagagcgctgattgggatcaggagggtcc  
aaggttcaaatccttgtatggagac  
1-8tRNA-Gly(tcc)c[68005,68078]  
gcggatatcgataatggcattacctcagacttccaatctgatgatgtga  
gttcgattctcattatccgctcca  
1-9tRNA-Leu(taa)c[68084,68170]  
gcgagaatgggtcaaattggtaaaggcacagcacttaaaatgctgcggaat  
gatttccttgtgggttcgagtccttctcgacca  
1-10tRNA-Gln(ttg)c[68171,68244]  
tgggaattagccaagttggttaaggcactggattttgattccaggatgcaa  
aggttcgagtcctttattcccagc

>MF988720.1 Pseudoalteromonas phage J2-1, complete genome

1-1tRNA-Ile(gat)c[132398,132472]  
cgttttgtagttagtggttattacggctcggtgataaccgacagatggt  
agttcgattctaccgaaacgacca  
1-2tRNA-Met(cat)c[132477,132551]

gctcctgtaacataatggctaattgtgacgactcataatcgtaaaccct  
tggtcgattcaaggcgggagcacca  
1-3tRNA-Cys(gca)c[132553,132627]  
gcagggttggcagagtagtaattgtgctggattgcaaatccagtataag  
ggcgcgattcccttaccctgctcca  
1-4tRNA-Tyr(gta)c[132919,133005]  
gggtcggttgggtgaattggtaaaccaccagactgtaaatctggcgtct  
ccgagcattcctagttcgagctaggcgcccccacca  
1-5tRNA-Ser(gct)c[133007,133097]  
ggagaattggctgagtggttaaggcgctcccctgctaaggagtgagacg  
ttagtagcgtcccaatagttcgaatctattattctccgcca  
1-6tRNA-Gly(tcc)c[133171,133244]  
gcgactatgggtgtagagtaacacgctgctcctccaagtcggaatctcgg  
gttcgatccccgatggctcgctcca  
1-7tRNA-Arg(tct)c[133253,133329]  
gcaagtgtagctcagttggatagagcagtagccttctaagctattggta  
gtggttcgagtcactcacttggtcca  
1-8tRNA-Trp(cca)c[133332,133406]  
agggatgtggtgaattggtaacatctcggattccaaccccgaggcagag  
agttcgaaactttccgtccctgcca  
1-9tRNA-Asp(gtc)c[133994,134069]  
agcgacattggtgtatcggttagcatacctgctgtcacgttgggtctcc  
gagttcgaigctcgggtatctccgcca  
1-10tRNA-Asn(gtt)c[134353,134427]  
gacggtgtagctcagaggcagagcatcggactgttaatccgcaggtcggg  
atttcgaaattccccaccgtctcca  
1-11tRNA-Glu(ttc)c[135052,135126]  
gctcgatcgtctaattggtaagacatctgactttctatcagaggattgg  
agttcgattctccatacagtagacca  
1-12tRNA-Pro(tgg)c[135129,135205]  
ctccgtatagctcagtttggtagagcattccgtttgggacggaagggtcg  
tatgttcaagtcgtactacggagacca  
1-13tRNA-His(gtg)c[135222,135294]  
ggtgacattagtttagtggtagaatttcgagttgtgacctcgaaggcag  
ggttcaattcccgatgtcacccc  
1-14tRNA-Lys(ttt)c[135318,135393]  
gggtcgtagctcagttggttagagcaggagcttttaactctcaggtcgt  
tggttcaaatccaacacggcccacca  
1-15tRNA-Ala(tgc)c[135395,135470]  
ggggatatagctcaattggttagagcactgctttgcaaggcaggggttta  
gggttcaaatccctatatctccacca  
1-16tRNA-Thr(tgt)c[135479,135551]  
gtcaaatagctcagttggttagagcatctgtttgtaatcagagggtcgg  
aggttcgaaaccttctgtagca

>MF403008.1 Agrobacterium phage Atu\_ph07, complete genome

6–1tRNA–Leu(caa)c[169426,169509]  
gcgccgctggtgaaattggttagacacagaatcctcaaaaggttccgcga  
aagcatcccgggtcagtcggggcggcgtagca  
6–2tRNA–Met(cat)c[169521,169596]  
aggcgggtagccaagtggtaaggccacctgctcataacaggtttatcgt  
cggttcgatcccgaacccgcctacca  
6–3tRNA–Ser(gct)[230506,230598]  
ggaacgttggccgagtcaggtttaaggcagcacattgctaacgtgctgtg  
cgtaatagcgtaccagaagttcgaatcttctacgttccgcca  
6–4tRNA–Val(aac)c[288496,288570]  
agtcaaatagctcaacccggtgaagagcggcctataaccaagggaatgatg  
atggttcaaatccatctttgactac  
6–5tRNA–Gly(gcc)c[303235,303309]  
gcgggtgtagctcagtggtagagcgtcacgttgccaacgtgaatgtcgag  
ggttcaaatcccttcgcccgtcca  
6–6tRNA–Met(cat)c[303646,303723]  
cgcggagtgagaaagtcggttaactcatcagcctcataagctgaggatc  
gcaggttcaaatcctgcctccgcaacca  
6–7tRNA–Asp(gtc)c[317242,317319]  
gcggatgtagctcagttggtcagtagcgtcggtgtgcacgccggaggtc  
gcgggttcgagtccttcattcgcgcca  
6–8tRNA–Arg(tct)c[317484,317561]  
ggttccttagttcagttggaatagaacgactgccttctaagcagtaggtc  
gtaggttcgagtcctacaggaatcgcca  
6–9tRNA–His(gtg)c[323350,323424]  
gcttgatcgtacaatggttagtacgctggtttgtggcaccggagatcgt  
ggttcaattccccgtccaagtacca  
6–10tRNA–Ser(tga)c[323788,323879]  
ggatgggtgtccgagtcggtttatggaactagctctgaaaactagcgtg  
cgtgagagcgtaccgtgggttcgaatccacccatcctcca  
6–11tRNA–Leu(tag)c[332329,332418]  
gcgggtgtggcggaattggtctacgcacgagtttaggtactcgcgcctc  
tttagcaggcttgggggttcaagtcctccacccgtacca  
6–12tRNA–Gly(tcc)c[332458,332530]  
gcgggtatagcttaatggtagagcgtgtccttccaagtcagaggccgtg  
ggatcgggtccctactaccgctc  
6–13tRNA–Gln(ttg)c[332539,332613]  
tcagggttagttcagtggtagaacgcgaatttttggtattcgatgcgga  
tgttcgaatcatccacctgatcca  
6–14tRNA–Pro(tgg)c[334331,334407]  
cggagtgtagcgcagctcgttagcgcacatctggttgggaccagagggtcg  
ggagttcgaatctctccactccgacca  
6–15tRNA–Phe(gaa)c[335908,335983]

gcacctgtagctcagttggtagagcatcgactgaagatcgaggtcac  
tggttcgattccagtcaggtgcacca  
6-16tRNA-Gln(ctg)c[335985,336058]  
ttgggattagtttaacggtagaacaacggactctgactccgttggtagt  
gttcgaatccattatcccaagcca  
6-17tRNA-Pro(tgg)c[336074,336151]  
cagggtataaggaagtctggtctatccggtcacacttggaatgtggcaac  
gctggttcaaaccagctaccctgacca  
6-18tRNA-Val(tac)c[336155,336229]  
gcgcgattagctcagcgggagagcgctcgtttacaccgaggatgtcggg  
agttcaatcctctcatcgcgacca  
6-19tRNA-Glu(ttc)c[337734,337810]  
acgtctgtggccaagttggttaaggcacctcactttcaatgaggaaatcg  
ccggttcgagtcggtcaggcgtacca  
6-20tRNA-Met(cat)c[337849,337921]  
atcgggattagctcagcggtagagcggcactttcatacgggttggtcgt  
ggttcaaactctactctcgatac  
6-21tRNA-Trp(cca)c[337925,338000]  
acacgtatagctcagttggtagagcggcgtctccaaaccgcaggtcgg  
gggttcgaagccctctgcgtgtgcca  
6-22tRNA-Tyr(gta)c[338064,338146]  
tggtggtgccagagcggtcgattgggacggactgtaaatccgtagtgt  
aagccacgttggttcgaatccaaccaccaac  
6-23tRNA-Ile(gat)c[338161,338240]  
gcgcgggtagctcagttttggtcagagcacaccactgataatggtgagg  
tcgatggttcaagtccatctccgcacca  
6-24tRNA-Pro(tgg)c[338316,338393]  
cagtcgctgggaaagtctggttaatccgtacacttggtgtagagaac  
gtgattcgaattcagccgcactgacca  
6-25tRNA-Phe(gaa)c[338698,338773]  
gcaatcgtaactcagttggtagaggtcacactgaagatgtgaaggtcat  
ccgttcgaaccggtcgtgacacca  
6-26tRNA-Arg(acg)c[338790,338867]  
gtacccgtagctcaactggactagagcgtggtctacggaaccagaggt  
gtggattcgactctaccgggtacgcca  
6-27tRNA-Ala(tgc)c[338871,338943]  
ggggaatgctctgggtaagcggacaatccttgcaagattgtagcccgacc  
ggttcgattccggtattctccac  
6-28tRNA-Lys(ctt)[390848,390923]  
gggtgcttagctcagttggtagagcaatcggtcttaaccggttggtcac  
aggttcgaaccctgtagcacctacca  
6-29tRNA-SeC(tca)[430713,430787]  
gggagtgtggctgactggtaaagcagatgccttcaaacattgagatgcg  
ggttcgattcctgtcactcccacca

6–30tRNA–Cys(gca)c[446807,446882]  
ggcgcggtgcaccgaatggtagtagctcctgcaaaggagatttatgt  
cagttcgaccctgacccgcgcctcca

>KU682439.2 *Stenotrophomonas* phage vB\_SmaS–DLP\_6, complete genome

7–1tRNA–Arg(cct)[92962,93038]  
gccctttagctcaactggacagagcagcgatttcctaggtcgccggttg  
taggtcgaatcctaccaagggcgcca  
7–2tRNA–Pro(tgg)[103314,103390]  
cggagttagcacagcttggtagtgcgcgtgcttgggagcatgaggtcg  
caggttcgattcctgtcactccgacca  
7–3tRNA–Asp(gtc)[103636,103709]  
gggacttaggcttctgggaagctagtggactgtctatccactcaggcgg  
gttcgatccccgtcagtcctcgcca  
7–4tRNA–Leu(tag)[103950,104037]  
gcgtcactaggggaattggcaaccactggatttaggtccagcgtccg  
aaagggcagtgagggttcgagtcctctgtgacgtacca  
7–5tRNA–Met(cat)[104140,104215]  
cgtgctgtacgattcgcggtgaatcgactggctctcataagccaagaaggt  
gagttcgactctcaccagcacgacca  
7–6tRNA–Gly(gcc)[104297,104371]  
gcgggttagctcagtggtagagttctccttgccaaggaagatgtcgag  
agttcgaatctcttcacccgctcca  
7–7tRNA–Met(cat)[104407,104483]  
tgcacggtacaatcaacggaagatggacagtctcataagctgctcggttg  
cgggttcgactcccgctgtgctacca  
7–8tRNA–Tyr(gta)[104488,104579]  
gggtgtattacggctagcggctaaagccaccagactgtaaactcggcgcc  
tcgcaagggcaatcgggtggttcgaatccatctacaccacca  
7–9tRNA–Leu(caa)[104656,104732]  
gctcccggtgccgcaactggaagacgggcttgattcaaaaccaagatgttg  
tcggttcgatcccgaccgggagtagca  
7–10tRNA–Ile(tat)[104738,104832]  
gcttctgtagtgaattggaagcacgagcggattatcacccgataccg  
ccagattagcggtagcctcgggtcgattccgagcagaagcacca  
7–11tRNA–Phe(gaa)[104845,104920]  
ggggcagtagctgatgaggtcttagcactggcttgaaaaccagagatgt  
cggatcgttaccgacctgccccacca  
7–12tRNA–Arg(ccg)[106026,106102]  
gccctttagctcatctggaagagcctccggtccgatccggaaggtag  
caggttcgactcctgtcaaggcacca  
7–13tRNA–Thr(cgt)[106481,106554]  
gtccattagtctaattggtatgacagctgttcgtaatcagctggcgggg  
gttcgattccctcatggagcacca  
7–14tRNA–Asn(gtt)[107530,107615]

ggtacgcgtgccagtgagggaagcaataggctgttaacctatcgacgaa  
agtcccggctctggttcgattccagagcgtatcgcca  
7-15tRNA-Glu(ctc)[108661,108737]  
gcacatatcttaacaggttcaggaagctagactctcaatctagtaatc  
ggggttcgagtcctccgtaggtgtacca  
7-16tRNA-Thr(tgt)[108827,108901]  
gctcctaaagcattgatggcgatgcagttgccttgtaagcatcagaaccc  
agttcgattccgggtgggagcacca  
7-17tRNA-Ile(gat)[109099,109172]  
tgtctcgtagctcaaaggtagagcaaccggctgataaccggctcgacactg  
gatcgttcccagtcgaagcaacca  
7-18tRNA-Asn(gtt)[109647,109721]  
ggatctcgagccagctgggtgtgggcagtgagctgttaactcatgaagcag  
ggatcgtaaccctgggggtccgcca  
7-19tRNA-Lys(ctt)[109728,109802]  
gggaagttaactcaactggtagagtcctgcctcttaagcagcgagacgcg  
agttcgatcctcgacttcccacca  
7-20tRNA-Glu(ttc)[109939,110012]  
acaccgttgcttctggtgaggcagtcagccttcaagctgacgcagaggg  
gatcgtaaccctacggtgtgcca  
7-21tRNA-Ala(tgc)[110017,110092]  
gggggattagctcagctgggagagcagttgcttgcagcatcaggtcat  
cggttcgatcccgatatcctccacca  
7-22tRNA-Cys(gca)[110184,110258]  
gtcctgtagcagagtggtcatgcggtggctgcaacccttccgacgtc  
ggttcgatcccgcacacaggactcca  
7-23tRNA-Gly(tcc)[110267,110341]  
gcaggtatgggtatattgattgtgccctagctcttccaaactagagaagcg  
ggtttgattcccgtacctgtctcca  
7-24tRNA-Gln(ctg)[110348,110421]  
agccctgtagttaatggtagaatatcggtctctgaaaccgaagacgaag  
gatcgataaccttctggggctgcca  
7-25tRNA-Trp(cca)[110432,110507]  
gcgtcagtagctcaattggcagagttccgaactccaaatccggcggttgt  
aggttcgattcctacctggcgcgcca  
7-26tRNA-Val(tac)[110516,110590]  
gcctgtctagtctctgggagaacaccctctttacacgtgggcttaggtg  
agttcgattctcacggcaggtacca  
7-27tRNA-Thr(ggt)[110832,110906]  
gcttgtagcacagtggtagtcacctcttggtaaagaggaggtcgcg  
ggttcgattccctctacaagcacca  
7-28tRNA-Val(gac)[111078,111152]  
agttccctagctcagtggtagagcgctccttgacatggagtaggtcagc  
ggttcgatcccgtgggaactacca

7-29tRNA-Asp(gtc)[111260,111337]  
 cgggcatgagactgcttgggtgtggttgcctccctgtcacgggagatatag  
 acgggttcgatccccgtatccccgacca  
 7-30tRNA-Arg(tct)[111579,111655]  
 gcgccattagctcaactggatagagcaactctttctaggctgtgggttg  
 agggttcgaatccttcattggcgcacca  
 7-31tRNA-Leu(gag)[112066,112142]  
 gcttccgtggcgcaattggaagacgactaccttgaggtggtaggtgttg  
 agggttcgagtccttcggaagtacca  
 7-32tRNA-Phe(gaa)[112149,112224]  
 gcttcggtagctcagttggtagagcagtggaactgaaaatcctcgtgcgg  
 cggttcgattccgccctgaagcacca  
 7-33tRNA-His(gtg)[112574,112648]  
 gtggtcttagttagtgggtctgcacgggtgtctgtgaaacaccaagtcga  
 tgttcgatccatcgattccaccca  
 7-34tRNA-Lys(ctt)[112656,112731]  
 ggggtccgtagctcaatggttagagcattcgctcttaagcgacaggtgt  
 gaggtcgagtcactggaccacca  
 7-35tRNA-Arg(acg)[112740,112816]  
 gcgccgttagctcagctggatagagtacctggctacgaactaggcggtcg  
 ggggttcgactccctcacggcgcacca  
 7-36tRNA-Pro(cgg)[113092,113169]  
 cggaggttagctcagctcgttagcagcgctactttcggaagtagaggtc  
 gcaggttcgattcctgtcactccgacca  
 7-37tRNA-Leu(cag)[113330,113406]  
 gcccatgtgacgcaattggtagacgtactatcctcagaaggtaggtgttg  
 gcgggttcgagtcgccctatgggcacca  
 7-38tRNA-Pyl(cta)[113763,113837]  
 gcgcgattagctctctgggagagcagccgcctctaaaacggtatgagatg  
 ggttcgatccccatatcgcgcgcca

>KR560069.1 *Stenotrophomonas* phage IME-SM1, complete genome

8-2tRNA-Arg(tct)[1537,1613]  
 gccccggtagctcaaccgtagagcaccgccttctaagcgggtggtta  
 ggggttcgattccctccgggtgcca  
 8-3tRNA-Ile(gat)[1615,1689]  
 agcgcgttagctcagcggtagagcactcgaccgataatcagtggtcgtg  
 ggtcaaatcctacacgcgtacca  
 8-4tRNA-His(gtg)[1709,1785]  
 gtgtacgttggtcgtattggttcggacgcctgattgtgagtcaggagcat  
 gtgggttcaattcccatctacacccc  
 8-5tRNA-Trp(cca)[2143,2218]  
 acgtcggtagctcaattggcagagcgggtggcctccaaagccactggttga  
 ggggtcaagtccttctcggcgtgcca  
 8-6tRNA-Cys(gca)[2227,2301]

ggctggttggtcagagagggtatgcggatggttgcaacccatcatatggc  
ggttcgagtcctcaccagcctcca  
8-7tRNA-Lys(ctt)[2716,2792]  
aggttgctagctcaactggttagagcaatcgcccttaagcgatagggtc  
agggttcaagtcctggcgacctacca  
8-8tRNA-Asn(gtt)[3162,3238]  
tctggattagctcagttggttagagcacgcgcctgtaagcgcggggtca  
ctggttcaagtcagtatccagagcca  
8-9tRNA-Ala(tgc)[3247,3322]  
gggctgtagctcagatgggagagcgctgccttgacgcaggaggtcgt  
cgggtcgatcccgacacggtccacca  
8-10tRNA-Val(tac)[3419,3494]  
gggttgtagctcagttggttagagcgctctcttacacggaggatgtcca  
gggttcgagaccttgacaaccacca  
8-11tRNA-Met(cat)[3503,3577]  
tgcgcgatagtgaaattggcatcacgtgggtctcataagcccaaatttcg  
ggttcgagccccggttcgcaacca  
8-12tRNA-Glu(ttc)[3585,3659]  
gcaccgttctctaaaggttaggagatcgggtcttcaccccgacaatagg  
agttcgagtcctctacggtgtacca  
8-13tRNA-Leu(caa)[3671,3754]  
gcccgagtggtggaactggcagacacactgcactcaaatgcagcgctc  
aggcgtgacggttcaaattccgtccttggttacca  
8-14tRNA-Ser(tga)[3762,3845]  
gggttggtgcagggcacaaactggtcttgaaaaccaggccatccga  
aaggttgagggttcgattccttcacgacccgcca  
8-15tRNA-Tyr(gta)[4133,4219]  
gtagtccggtgaagttggagagtcacaccaggctgtaaacctggcgctt  
tatggctgagtaggttcgattcctacgcgtgcacca  
8-16tRNA-Phe(gaa)[4224,4298]  
gcgtcgatagctgagatggattagcgaggggctgaaaatccctagaggt  
ggttcgataccaattcgatgcacca  
8-17tRNA-Asp(gtc)[4309,4385]  
cgggttgtagttcagttggttagaatgctgcctgtcacgcaagaggtca  
cgggttcgatccccgtcagcccgacca  
8-18tRNA-Gln(ttg)[4430,4505]  
agcgggttagctcagatggaagagcagtggttggatccattggtcgg  
gggttcgactccctcaccgcccacca  
8-19tRNA-Ser(gct)[4517,4606]  
gggtatttcgtgagtcgtggtttaaagcagctccgtgctaaggagtcagg  
tcgaaaggcctcgtaggttcaaattcacaatacccgcca  
8-20tRNA-Gly(tcc)[5159,5232]  
gcgagagtagtttaacggtagaatgtctgcctccaagcagatggttcgg  
gttcgattcccgggtctcgtcca



8-21tRNA-Pro(tgg)[149006,149082]  
cggggtatagcgagctctggtagcgcgctgcttgggagcaggatgtcg  
ggggttcgagtcctctaccccgacca  
8-22tRNA-Leu(tag)[149171,149253]  
gggcgtgtggtggaattggcagacacactggattaggtccagcgcttc  
ggcgtgaggggttcgagtcctcctagcccacca  
8-23tRNA-Thr(tgt)[149582,149657]  
gccggttagctcagctggtagcaactgcctgtaagcagtaggtcgt  
cgggtcgaatcccgacagccggcacca

>KC292026.1 Halovirus HGTV-1, complete genome

9-1tRNA-Ser(gga)c[42266,42352]  
gccgtgacaaggggatggcgaccccgcatgctggaaccatcgtgtcct  
gagatatggcttcaggttcgactcctgctctcggcg  
9-2tRNA-Val(gac)c[42609,42683]  
gggtgtgtgtccaactcggtaagataccgcattgacattgcggtgatt  
tgaggttcaaatcctctcgacacca  
9-3tRNA-Val(tac)c[42688,42762]  
acgggtataattcaatctggtcagaatactccgcttacatcggagatgtt  
gaaggttcaaatcctctgccccga  
9-4tRNA-Pro(tgg)c[42770,42840]  
tggctggtggtccaatggtacgattcggcggttgggacgccgagatatgg  
gttcgactccctccagccaa  
9-5tRNA-Leu(taa)c[45441,45526]  
aggtcggtgcgccgagctctggtcaaaggcagggcacttaagatccccga  
ttagtcttcacaggttcaaatcctgtccggcctac  
9-6tRNA-Leu(caa)c[45530,45613]  
gagtgatagccaagtggtaaaaggcaggagagtc aaatcctcccgtat  
agtccttcgcaggttcgaatcctgctccgctcac  
9-7tRNA-Leu(gag)c[45617,45700]  
gcatctgtagggaactggtgaaacccataggcttgaggggccttgcccgt  
aggggcttcttggttcgattccaagcgggtgca  
9-8tRNA-Leu(tag)c[45786,45869]  
gagtcggtacgagaaatggttaaactcacgaggcttaggacctcgcgctt  
tagtgctttgcaggttcgaatcctgcccggctca  
9-9tRNA-Arg(tct)c[46355,46430]  
taggcgtataaggtagtgactatcccgcgagtccttctaaactgcgaca  
ggggttcgaatccccttacgcctgtc  
9-10tRNA-Arg(tcg)c[46700,46775]  
tgccacgtagcctaattggataaggcaatggccttcgaagccagagatt  
gcaggttcgagtcctgctggtggcgct  
9-11tRNA-Ser(tga)c[47447,47532]  
gccgagattgagtcaggcaaaactcagtcgttttga aaacagacggtcgc  
atatcgcgccaagaggttcaaatcctgctcggcg  
9-12tRNA-Cys(gca)c[47537,47609]

gtcgggatgccagagtggcacgcccggacagcagattcgggtacggg  
ggttcgaatccctctcccactc  
9–13tRNA–Ile(gat)c[48011,48085]  
gcgttcgtagccaaatcaggaaggcgtccgctgataacggaagattt  
gttggttcaaatccaaccggacgca  
9–14tRNA–Gln(ctg)c[48088,48162]  
tagtcggtttgttagcggccaatcatcacgaggtctgaccctcgtgaca  
gaggttcgaatcctctaccgactat  
9–15tRNA–Ser(gct)c[48164,48246]  
gccgtggttgagtgcaggcaactcggttggattgctaataacgcctt  
tatggtcagaagggtcgaatccttccctcggcg  
9–16tRNA–Ile(gat)c[48250,48320]  
acgaggatagtgtaatggaaacactccggtcagatggaccggcactacct  
gttcgattcaggttcctcgtga  
9–17tRNA–Ser(cga)c[48383,48468]  
gccggtggttgagcaatctggtcgctcacctgtctcgaacacaggctccc  
atttggaatgcagggtcgaatcctgccctcggcgc  
9–18tRNA–Trp(cca)c[48474,48544]  
gaggtcttgggtaatagaatcctactcgcctccagagcgagtgatggga  
gtgcaaatctctcagacctca  
9–19tRNA–Gln(ttg)c[48548,48620]  
agtccccgagtcgctggcgaaagacgctcggcttggaccgagagagcg  
aggttcgattcctcgggggacta  
9–20tRNA–Lys(ttt)c[48804,48876]  
gggccggtggcgaaatggcttaacgcaggaggctttaaactcccatcgc  
gggttcgattcctgctcggccca  
9–21tRNA–Thr(ggt)c[48880,48952]  
atccagtatggtctaattggtagggcacggcttggatggctgacgtgag  
ggttcaactccctctgctggatt  
9–22tRNA–Thr(cgt)c[48954,49029]  
atccgttggtgccaatttgacgggcactcgcctcgtgaagcgagaggtt  
gtgggttcgattcccaccagcggatt  
9–23tRNA–Thr(tgt)c[49031,49103]  
tcgggtcaggcccataggagtggcgttccttgaaggaacagacggt  
gggttcgactcccacgaccgat  
9–24tRNA–Met(cat)c[50107,50194]  
tcccagcttgagcagctctggctatgctcggcaggctcatatcctgttgt  
gcttcgcacgaaatgggttcgaatcccatcgtcggaat  
9–25tRNA–Lys(ctt)c[50195,50271]  
gggctgatggcgaaacttggtctaaacgcggaaggctcttgaccttctaca  
tacgggttcaaatcctgttcagccac  
9–26tRNA–Tyr(gta)c[50274,50347]  
ctctgaagaccgctggttaagggtacacgcctgtagagcgtgttcagat  
aggttcgaatcctactcgggagac

9–27tRNA–Asn(gtt)c[50350,50424]  
 tgtcgcgtagttcaattagtagaacactcggctgttaccgagatgttg  
 gaggtgcaagtccctccctgcgacgt  
 9–28tRNA–Gly(gcc)c[50474,50544]  
 gcgtggttggtccaatggaaagacggctccctgccacggagcagactcgg  
 gttcgattcccgaatcgcgca  
 9–29tRNA–Gly(tcc)c[50549,50619]  
 gcgtggctgtccaatggcaagatcgggcctccaagcctgagatacga  
 gttcgactctcgtgccgcgca  
 9–30tRNA–His(gtg)c[50624,50697]  
 tccggcgcgtggtggaaaagttaacattcgccctgtgacggtcgagatac  
 gactgcgaatctcgtgcccggacc  
 9–31tRNA–Glu(ctc)c[51556,51632]  
 gctgattggagtctccgtggcgagagacgtacgttctcagcgtagaggt  
 cgcgggttcaattcctgtcatcagcac  
 9–32tRNA–Phe(gaa)c[51636,51710]  
 gggtcgataggataattgggaatccacctgttgaagaacaggcgcac  
 tcggttcaaatccgggtcggccac  
 9–33tRNA–Ala(agg)c[52081,52168]  
 gctggcttgggtagtggacgcacggcattaagccaatccttcgaccc  
 tcgaggtcgagacacgagttcgaatctcgtagccagta  
 9–34tRNA–Asp(gtc)c[52304,52376]  
 tgccgaagtggctctaaaagtaagatgcgtgcctgtcacgcagagactcg  
 ggagcattaccgggttcggcgt  
 9–35tRNA–Arg(gcg)c[53348,53420]  
 gggcgattggctactggatatgacacatccctgcgaaggatgagaagg  
 agttcgattctctcattgccac  
 9–36tRNA–Gly(tcc)c[121104,121188]  
 acgccgcctccacaggatagccgttcgttccgtcgaacgtggctact  
 gtgtagggcatactcgttcggtcgagttgacgtg

\*Nudiviridae

>KM610234.1 *Tipula oleracea* nudivirus isolate 35, complete genome  
 1–1tRNA–Val(tac)[39778,39850]  
 gcgggtatggctagtgggtatggcgtctgtttacacgcagaaggtccc  
 ggggtcaatccccgggtgcccgta

\*Phycodnaviridae

>JF411744.1 *Paramecium bursaria* Chlorella virus 1 (PBCV–1), complete genome  
 1–1tRNA–Leu(caa)[164946,165026]  
 gatagggtatgcaagtggtaaagcagctggtctcaagatccagtccttc  
 ggggtcgcgggttcgactcccgtctctatca  
 1–2tRNA–Ile(tat)[165052,165124]  
 gttcgcttagctcagtggttagagcattggctttagagccaagggtcac  
 cggttcgatcccggtagcgaaca  
 1–3tRNA–Asn(gtt)[165254,165327]

gacgccatagctcagttggtagagcggttcgactgttaatcgagaggtca  
 ccggttcgaacccggttggtgtcg  
 1-4tRNA-Lys(ctt)[165330,165403]  
 tgcccgctagctcagtcggtagagcgccagactcttaatctggtggtcg  
 tgggttcgagccccacggtggcat  
 1-5tRNA-Asn(gtt)[165427,165500]  
 gacgccatagctcagttggtagagcggttcgactgttaatcgagaggtca  
 ccggttcgaccccggttggtgtcg  
 1-6tRNA-Lys(ctt)[165503,165577]  
 tgcccgctagctcagtcggtagagcgccagactcttaatctggtggtcg  
 tgggttcgagccccacgatgggcat  
 1-7tRNA-Lys(ttt)[165709,165783]  
 tgcccgctagctcagtcggtagagcgccagacttttaatctggtggtcg  
 tgggttcgagccccacgatgggcat  
 1-8tRNA-Arg(tct)[165805,165881]  
 tggtcgctagctcagtcggataagagcaacagacttctaactctgtaggt  
 cgtgggttcgagccccaccgtgatcga  
 1-9tRNA-Val(aac)[165914,165986]  
 gatcccttagctcagttggaagagttttgcctaacacgcagaaggtcgc  
 aggatcgaaacctgcagggatca

>AJ890364.1 *Emiliana huxleyi* virus 86 isolate EhV86

1-1tRNA-Ile(tat)c[39461,39534]  
 gtccattaactcagttggtagagtgtgttcctatgaagctatggtcgg  
 cgttcgagcacgccatgggacac  
 1-2tRNA-Gln(ttg)c[43293,43364]  
 cctcctatagctagcggttaaggacaatggttcttgataccatgagcatg  
 tgttcgaatcacattaggaggt  
 1-3tRNA-Asn(gtt)c[43367,43441]  
 tcccatgtagctcaattggtcagagcgtcggtgttaaccgcaaggttg  
 tgtgttcgattcacaccgtgggagc  
 1-4tRNA-Arg(tct)c[203554,203628]  
 agccctcgtagctcagtgtagagctcttgcttctaagcaagtggtcg  
 cgagttcgatcctcgccgtgggtt

>DQ890022.1 *Paramecium bursaria* Chlorella virus FR483, complete genome

1-1tRNA-Ile(tat)[141848,141920]  
 gttcgcgtagctcaatggtcagagcactgatcttatgagtcaggggttcg  
 cgggttcgagtcgggtcgtgaaca  
 1-2tRNA-Leu(taa)[141945,142029]  
 ggcacgattccaagtctggtcaacggggctggtcttaagaaccagtgc  
 atatgcttcgtcggttcaaatccggtcgtgctac  
 1-3tRNA-Arg(tct)[142053,142128]  
 gtctctgtggcgcaatggacagcgcgttgacttctaatacgaaggttcg  
 ggggttcgacccccgccagagacgcca  
 1-4tRNA-Gly(tcc)[142129,142199]

ggatgtgatgcaacggtagcataacagcctccaagctgtaaacctgg  
gttcgactcccagcacattca  
1-5tRNA-Asn(gtt)[142222,142297]  
tggcgtcctagctcagtcggttagagcgacaggctgtaaacctgtaggtc  
atcggttcgattccgatggatgccga  
1-6tRNA-Asn(gtt)[142319,142394]  
tggcgtcctagctcagtcggttagagcaacaggctgtaaacctgtaggtc  
atcggttcgattccgatggatgccga  
1-7tRNA-Tyr(gta)[142416,142501]  
ctcgccatagctcaattggaagagcgaaggactgtaattgtttattgtc  
atccttaggtacctggatcgaaaccgggtggtgaga  
1-8tRNA-Lys(ctt)[142504,142576]  
gcccggtagctcagtcggttagagcgctagactcttaatctagtggtcgt  
gggttcgagccccacatcgggca  
1-9tRNA-Thr(cgt)[142738,142810]  
gccggtgtagcttagtggtaaagcgcttgcttcgtaagcaagagaccatg  
agttcaatcctcatcaccggcac

>EF101928.1 Acanthocystis turfacea Chlorella virus 1, complete genome

1-1tRNA-Ser(act)[83726,83794]  
gtccttagctcagaggagagcgctggtctactagaccaaagggggcgggt  
tcaattccgtcatggagaa  
1-2tRNA-Arg(tct)[83799,83873]  
gggagcgtagctcagttggatagagcgacagacttctaactgtaggccg  
tgggttcgagccccaccgttctcgc  
1-3tRNA-Gly(tcc)[83898,83968]  
ggactcgtgatgtagtggtaacatactgcctccaagcaagatacctgg  
gttcgattcccagcgtgttca  
1-4tRNA-Asp(gtc)[83991,84062]  
gtcgtggtagtatagtggttagtattcctgcctgtcacgcaggagaccgg  
ggttcaattccccgccacggcg  
1-5tRNA-Val(aac)[84086,84158]  
gaccgtagctcagttggttagagcatctgttaacacgcagaaggtctg  
gggatcgagaccattgggtta  
1-6tRNA-Asn(gtt)[84276,84349]  
ggcgctgtagctcagtcggttagagcacttggctgttaaccaaggggtca  
tcggttcgattccgatcagtgccg  
1-7tRNA-Lys(ctt)[84456,84528]  
gcccggtagctcagtcggcagagcgcaaggctcttaaccttgggtcgt  
gggttcgagccccacatcgggca  
1-8tRNA-Asn(gti)[84551,84624]  
ggcgctgtagctcagtcggttagagcacttggctgttaaccaaggggtca  
tcggttcgattccgatcagtgccg  
1-9tRNA-Leu(taa)[84773,84858]  
ggcagcatcggttagtcaggtccagaccgggggtcttaagaacctctct

cttatgagggcgtgggttcgaatcccactgttgcca  
1-10tRNA-Thr(agt)[115793,115867]  
gctcccatagctcagttggttagagcgcgacttagtaaggtcgaggtcc  
gtgggtcgaatccgcgtgggagcac

>DQ491003.2 Paramecium bursaria Chlorella virus AR158 genomic sequence

1-1tRNA-Leu(taa)[172099,172184]  
ggtaccatggccgagttggttaaggcgatccgcttaagacggattggac  
acacgtccacggaggttcgaatccttctgtactac  
1-2tRNA-Ile(tat)[172209,172281]  
gttcgcttagctcagtgatagagcattggtcttatagccaagggtcac  
cggttcgatcccggtagcgaaca  
1-3tRNA-Asn(gtt)[172307,172378]  
gacgatgtggtgaaaagggtatcacagatggctgttaacctccgttcag  
agttcgattctctgcttcgtcg  
1-4tRNA-Leu(caa)[172430,172514]  
ggcagaatcgatagcctggtccattccgtcccgtcaagacgggaaccc  
ttcggggcggtgcgtcaaatcgcaacttctgtac  
1-5tRNA-Arg(tct)[172537,172611]  
ggccacgtgatgaaatggatatcatattcgacttctaatacgaaattccg  
agttcgatcctcggcgtggctgcca  
1-6tRNA-Gly(tcc)[172612,172684]  
ggcacattgatgaagttggttatcatactgcctccaagcaagattccc  
ggattcgaattccggatgtgtca  
1-7tRNA-Val(aac)[172708,172781]  
gatcccttagctcagttggaagagttttgcctaacacgcagaaggtcgc  
aggatcgaaacctgcaggatcac

>EU304328.2 Ostreococcus tauri virus OtV5, complete genome

1-1tRNA-Gln(ttg)[145641,145713]  
agcttctatggtgtagtggttaacacagtgactttgaatccaccgccaca  
ggttcaatccctgttggaagctt  
1-2tRNA-Asn(gtt)[145817,145890]  
tcactcatcgtctagtggtttaggacaatcggctgttaaccggttaacca  
gggttcgaatccctgtgagtgaac  
1-3tRNA-Thr(agt)[145893,145966]  
tgcatctatggccaagtggtaaggcgtctcttagtaaggagaagatcgt  
gcgttcgaaccgcactagatgcat

>DQ491002.1 Paramecium bursaria Chlorella virus NY2A Chlorella virus NY2A ctg\_13 genomic  
sequence

1-1tRNA-Leu(taa)[194698,194778]  
gtgtcgttgggggagtagtcaaaccaggagacttaagttctccgcctc  
ggcttcgtcggtgcaaatccggcacgacaca  
1-2tRNA-Leu(caa)[194921,195006]  
gccaggatggccgagttggttaaggcgatcgctcaagagcgattggatg  
ttatgtccgctaggttcgagccctacttctggcac

1-3tRNA-Arg(tct)[195029,195103]  
ggccacgtgatgaaatggatatcatattcgacttctaatacgaaatttccg  
agttcgatcctcggcgtggctgcca

1-4tRNA-Gly(tcc)[195104,195176]  
ggcacattgatgaagttggttatcacttgcctccaagcaagattccc  
ggattcgaattccggatgtgtca

1-5tRNA-Asn(gtt)[195201,195272]  
gaccctatggtgaaacggttatcacaggaggctgtaaccaccggtcgc  
agttcgattctgcgtggggtcg

1-6tRNA-Lys(ctt)[195382,195457]  
gcccgcttagctcagcatggcagagcgctagactcttaactagtggtc  
gtgcgttcaaatacgacagcgggtac

1-7tRNA-Val(aac)[195482,195555]  
gatcccttagctcagttggaagagttttgcctaacacgcagaaggcgc  
aggatcgaaacctgcaggatcac

>FN600414.1 *Ostreococcus tauri* virus 2, complete genome

1-1tRNA-Gln(ttg)[136163,136236]  
agctcttatagttagtggatcatcactttggactttgaatccaacaacct  
tggttcaatccaggtaggagctt

1-2tRNA-Asn(gtt)[136348,136422]  
tttcttgtaactcaatcggaagagtgtagcactgtaatcgtaaagtag  
cgagatcgaaactcgccaaggaaagt

1-3tRNA-Thr(agt)[136426,136499]  
tgcatttatggccaagtggtaaggcgtctcttagtaaggagaagatcgt  
gcgttcgaaccgcactagatgcat

>HM004431.1 *Ostreococcus lucimarinus* virus OIV1, complete genome

1-1tRNA-Gln(ttg)[145408,145494]  
agcttttatggtgtagtggaactgcggacttgactttaacgaagac  
gatccgccaccctaggttcgaatcctagtagaagctt

1-2tRNA-Leu(tag)[145498,145585]  
ccagtgttagctcagttggaagagcagtggttagtagtatgatatag  
atctccacgggtcgggtgttcgaatcatccacactgga

1-3tRNA-Asn(gtt)[145589,145664]  
ttcccttgtaactcagttggttagagtgttcgactgtaatcgagaagcc  
accggttcgaatccggtcaagggaga

1-4tRNA-Thr(agt)[145669,145741]  
gcacctgtagcatagtggttaatgcgcctcttagtaaggaggagaccgc  
gtgttcgaatcacgccaggtgca

>HM004432.1 *Bathycoccus* sp. RCC1105 virus BpV1, complete genome

1-1tRNA-Leu(aag)[131783,131864]  
gatgccgtggccgagtggtctaaggccagattaaggctctggttcgga  
agagcgcagggtcaaactctgtcggcatcacc

1-2tRNA-Asn(gtt)[131980,132055]  
ttctctgtaactcagttggttagagtgtgcgactgtaatcgcaagtc

accggttcaactcgggtcgagagagt

>HM004429.1 *Micromonas* sp. RCC1109 virus MpV1, complete genome

1-tRNA-Ile(tat)[136710,136783]

gttcttatagctcagttggttagagcgtggcttataacccaaggtca

cgggttcgagccccgttgggaaca

1-2tRNA-Gln(ttg)[138249,138322]

ggctctcatagtagtaggtcaacactgtggactttgaatccaccacacct

aggttcgactcctagtagggagctt

1-3tRNA-Tyr(gta)[138325,138398]

cctctcttagctcagttgggagagcagtggtgtagttccaagggtcag

gtgttcgattcacctagagaggac

1-4tRNA-Asn(gtt)[138403,138476]

tcttccatagctcagttggttagagcgtgcgactgttaatcgcaaggtcat

cgggttcgaacccggttgaagagc

1-5tRNA-Leu(taa)[157972,158055]

tgctgagatgccccagtggtctaaggggacgtcttaagaacgtctggcg

caagcctcacgggttcgaacccggttctcagcat

1-6tRNA-Thr(agt)[158059,158130]

gcactcatagctcagggtagagcgttaagtttagtaagcttaaggtcaag

ggttcaaataccctttgagtga

>KC662249.1 *Phaeocystis globosa* virus strain 16T, complete genome

1-tRNA-Leu(caa)[176759,176838]

gtattggtgcccgagtggttaagggtaaattcaagcatatatggcgaaa

gcctcgtgggttcgaatccccccaataca

1-2tRNA-Ile(tat)[408944,409017]

gttctattaactcagttggttagagtcggtcttatagccgaaagtcg

tgggttcgagtcacacatagaaca

1-3tRNA-Gln(ttg)[409027,409100]

agttcccatagtagtaggttatcacggtggttttgataaccacaaactc

tgggtcgaatccaggtgggaactt

1-4tRNA-Asn(gtt)[409104,409179]

tgctccatagctcagttggtcagagcgtgcggctgttaaccgcgaggtc

accggttcgaaaccggttgaggcgt

1-5tRNA-Leu(taa)[409206,409291]

tatcacggtgtccgagctcgtttaaaggagcaagatttaagacctgtgc

gttcgcgctcgcgggttcgaatcccccccgatgat

1-6tRNA-Asn(gtt)[409295,409370]

tgctccatagctcagttggtcagagcgtgcggctgttaaccgcgaggtc

accggttcgaaaccggttgaggcgt

1-7tRNA-Leu(taa)[409393,409476]

gtcacggtgtccgagctcgtttaaaggagcaagatttaagacctgtgcg

ttcgcgctcgcgggttcgaatcccccccgatgaca

1-8tRNA-Arg(tct)[410486,410560]

tgcccgctgacgcaatggatagcgtgccagacttctaacttgaagttg



cggttcgagtcgccgtcgtggtaa

>KJ645900.1 Aureococcus anophagefferens virus isolate BtV-01, complete genome

1-1tRNA-Thr(agt)c[118324,118395]

gcttttggcttaatggtaaagcgacatcctagtagatgtagattccg

cggtcgattcgcgcaaaagct

1-2tRNA-Arg(tct)c[148317,148390]

gccctattggcgaaattggatatcggtccgccttctaagcggaagattc

tgggttcgatccccagatagggtt

1-3tRNA-Leu(taa)[322252,322333]

atctgttggcggagtggtctaacgcgccgatttaagccccggctccta

acgaggcgcaagttcgaaccttgcaacagata

1-4tRNA-Ile(tat)[322371,322446]

ttgcctataattcaatctggttagaatgaccgtcttataagcggtttat

atgggttcaaattcccattaggcgaat

1-5tRNA-Ser(tga)[322625,322707]

gatactgtgatggaattggtagacatgtcagacttgaaatctgttgcccg

atgggcgtgagcgttcgagtcgctccagtatct

1-6tRNA-Leu(taa)[322727,322812]

ccgtctatagttcagtagaagaacgttcgactgtaatggttaagcatat

atcgaaagtcgctgggtgcaagtcagctagacgga

1-7tRNA-Gln(ttg)[322836,322906]

gctcatatggtgtaatggtagcactaaagatttgattcttcaatttca

gttcgattctgaatatgagct

>KP874737.1 Ostreococcus lucimarinus virus 7 isolate OIV7, complete genome

1-1tRNA-Gln(ttg)[136442,136528]

agctttatgggtgtagtggaactgcggactttgactttaacgaagac

gatccgccaccctaggttcgaatcctagtagaagctt

1-2tRNA-Leu(tag)[136532,136619]

ccagtgtagctcagttggaagagcagtggttagtagtagtatgatatag

atctccacgggtcgggtgttcgaatcatccacactgga

1-3tRNA-Asn(gtt)[136623,136698]

ttcccttgtaactcagttggttagagtggtcactgttaatcgagaagcc

accggttcgaatccggtcaagggaga

1-4tRNA-Thr(agt)[136703,136775]

gcacctgtagcatagtggttaatgcgcctcttagtaaggaggagaccgc

gtgttcgaatcacgccaggtgca

>KT820662.1 Chrysochromulina ericina virus isolate CeV-01B, complete genome

1-1tRNA-Leu(caa)c[74479,74562]

tgtatggatgcccagtggtctaaggggtagactcaagttctactgtcg

taagactcgtgggttcgaatccactccatacaa

1-2tRNA-Ser(tga)[235796,235880]

tgacatcgtgcccagttggttaaggggatggactgaaatccattgggc

attgccctcgcgagttcgaatctcgtcgatgtcgt

1-3tRNA-Ala(tgc)[235890,235962]

gggatgtagatcaattgtagatcgctcgctttgcatgcgagaggtacc

gggatcaaaaccagcatctcca

1-4tRNA-Ser(gct)[235968,236051]

tgacaccgtggccgagtggttaaggcagtgactgctaattccatttcct

atgggatcgcgagttcgaatctcgtcgggtcga

1-5tRNA-Gly(tcc)c[383694,383764]

gcactattggttagtggaacatgttcgcctccaagcgcgccagg

gttcgattccctgatatgca

1-6tRNA-Ile(tat)[423375,423450]

tgctcgcgtaactcagttggttagagtgttggtcttatgagccaaaagtc

cgcggttcgagcccgcgctgagcat

1-7tRNA-Lys(ttt)[423493,423567]

ttctcggataactcagttggttagagtgggcgtcttttggggtctagtc

ctagttcgagtcaggttcgagaaa

1-8tRNA-Gln(ttg)[423572,423643]

gctcctgtagttagaggtaatcactgaggactttgaatcctccaacgcc

agttcgaatctggccgggagct

1-9tRNA-Leu(taa)[423766,423847]

gcatggatgcccagtggtctaaggggcagacttaagatctgctggcga

aagcctcgtgggttcaaaccctcctcgca

1-10tRNA-Asn(gtt)[423964,424038]

gctccgttagctcagttggttagagcgtgcggctgtaaccgcaatgtca

ctggttcgatcccagtagcgagcgc

1-11tRNA-Lys(ttt)[424072,424144]

gttccttagctcagttggttagagcgacgacttttaatcgtgtggccag

cggttcgagcccgctaggaata

1-12tRNA-Arg(tct)[424179,424252]

gcccctgtggcgaattggatagcgaccagacttctaactcgggggttg

cgagttcgaatctcgccaggggtt

>KP874735.1 *Ostreococcus mediterraneus* virus 1 isolate OmV1, complete genome

1-1tRNA-Gln(ttg)[150843,150915]

agcttctatggttagtggaacacagtgactttgaatccaccgccaca

ggttcgatccctgttgaagctt

1-2tRNA-Asn(gtt)[151019,151092]

tcactcatcgtctagtggttaggacaatcggtgtaaccggttaaccg

gggttcgaatccctgtgagtgaac

1-3tRNA-Thr(agt)[151095,151168]

tgcatctatggccaagtggtaaggcgtctcttagtaaggagaagatcgt

gcgttcgaaccgcactagatgcat

>KP874736.1 *Ostreococcus lucimarinus* virus 2 isolate Olv2, complete genome

1-1tRNA-Gln(ttg)[145281,145354]

agctcttatagtgtagtggtcatcactttggactttgaatccaacaacc

tggttcaaatccaggtaggagctt

1-2tRNA-Asn(gtt)[145466,145540]

tttcttgtaactcaatcggaagagtgtacgactgttaatcgtaaagtag  
cgagatcgaaactcgccaaggaagt  
1-3tRNA-Thr(agt)[145544,145617]  
tgcatctatggccaagtggtaaggcgtctcttagtaaggagaagatcgt  
gcgttcgaaccgcactagatgcat

>LC015649.1 Yellowstone lake phycodnavirus 3 DNA, complete genome, isolate: 3

1-1tRNA-Gln(ctg)[52689,52762]  
gggttccatagtataacggttagtacatcagactctgactctgtaaatgc  
gtgttcgattcacgctggaacctt  
1-3tRNA-His(atg)[55378,55477]  
tgctccaataacacaactggtagtgatcggtcttatgaaaattgaatt  
ttcatgcaagtgagccgaaaatccgagttcgatcctcggttggagcagcc  
1-4tRNA-Arg(tct)[55483,55557]  
gactctgtggcgaaattggatatcgcggtgggacttctaatacccgagattg  
cgggttcaaaccgccagagccgc  
1-5tRNA-Leu(taa)[55560,55646]  
ttcatcagtgccgagttgggtctaaggaggagacttaagatctcctgtg  
cgcaagcacgcgtgggttcgaacccacclgalgaaa

>LC015648.1 Yellowstone lake phycodnavirus 2 DNA, complete genome, isolate: 2

1-1tRNA-Thr(agt)c[79624,79698]  
tgctttcgtagctcaattggtagagcacccgttagtaagcgggaggtaa  
tgagatcaaagctcatcgaaagcag  
1-2tRNA-Pro(agg)c[79979,80077]  
ggctctgtagcacaattggatagtcaccagccttctaggaggaccttcg  
gtccgtcagtgtaagctggaggttcggggtcgacccccgccagagtca  
1-3tRNA-Gln(ttg)c[80084,80160]  
gcatcgggtgccgagcctggttcaaggagagatctgttggtgtttcacc  
acacgggttcaatcccgtccgatgca  
1-4tRNA-Ile(tat)c[80161,80234]  
gctctgtaactcagatggttagagtgttggtcttatgtccaaaagtcg  
tgagttcaatcctcaccgggagca

>LC015647.1 Yellowstone lake phycodnavirus 1 DNA, complete genome, isolate: 1

1-1tRNA-Leu(taa)[60048,60130]  
agtagtgtaggagagtgggtcaaatccgttcacttaagatgcaatacctt  
cgcgtttcgcgggttcgaatcccgcgctacta  
1-2tRNA-Ile(tat)[60135,60209]  
gttctagtaactcagttggtagagtgcgggtcttatgagccgaagtcg  
cgggttcgacccccgcctagaacac  
1-3tRNA-Glu(ttc)[60211,60300]  
tggccctgtggcataatcgataatgcgtcagccttctactcaagagaca  
gcgagctgaagattgcgggttcgacccccgccagggcat  
1-4tRNA-Gly(tcc)[60823,60894]  
gcgcatatagtatagtggttagtacagaaccctccaaggttcaaggcgg  
ggttcaattccccgtgtcgca

1-5tRNA-Thr(agt)[60898,60970]  
gcctctgtagctcaattggttagagcactcggttagtaagcgagaggtatt  
gagatcaaaactcaacggaggca  
1-6tRNA-Gln(ctg)[60976,61047]  
ggttcatagtataacggtagtacacaggactctgaatcctgtaatggg  
agttcgattctccctggaacct  
1-7tRNA-Asn(gtt)[61048,61122]  
tcctctataactcagctggttagagtgtaggctgttaacctgaaagtcg  
caggttcgatccctgctggaggagc

>KX857749.1 Only Syngen Nebraska virus 5, complete genome

1-1tRNA-Leu(taa)[166543,166628]  
gatagtgtatgcaagtggtaaagcacctcgacttaagatcgagtcacctt  
tcgggttcgcgggttcgacccccgcgctatcacca  
1-2tRNA-Ile(tat)[166629,166710]  
tcgacattaagataacggtcattcgctgggtcttatacatttatgaaagc  
ctggaacccgggttcaactcccgatgtcgaa  
1-3tRNA-Leu(taa)[166734,166819]  
gatagtgtatgcaagtggtaaagcacctcgacttaagatcgagtcacctt  
tcgggttcgcgggttcgacccccgcgctatcacca  
1-4tRNA-Ile(tat)[166820,166901]  
tcgacattaagataacggtcattcgctgggtcttatacatttatgaaagc  
ctggaacccgggttcaactcccgatgtcgaa  
1-5tRNA-Leu(taa)[166925,167010]  
gatagtgtatgcaagtggtaaagcacctcgacttaagatcgagtcacctt  
tcgggttcgcgggttcgacccccgcgctatcacca  
1-6tRNA-Asn(gtt)[167117,167190]  
gagccatagctcagttggttagagcgttcgactgttaatcgagaggtcg  
tcggttcgaacccgactggtgtcg  
1-7tRNA-Gly(tcc)[167193,167265]  
tggcacattaatataacggtagtataacagcctccaagctgtaagcctg  
ggttcgactcccagatgtgtcaa  
1-8tRNA-Asn(gtt)[167288,167361]  
gagccatagctcagttggttagagcgttcgactgttaatcgagaggtcg  
tcggttcgaacccgactggtgtcg  
1-9tRNA-Lys(ctt)[167364,167438]  
tgcccgctagctcagtcggttagagcgccagactcttaatctggtggtcg  
tgggttcgagccccacggtgggcaa  
1-10tRNA-Arg(tct)[167464,167537]  
tgtctgtatggtgtaatggatagcaccttgagcttctaactcaatgatcc  
gagttcgatcctcggtacagatat  
1-11tRNA-Arg(tct)[167563,167636]  
tgtctgtatggtgtaatggatagcaccttgagcttctaactcaatgatcc  
gagttcgatcctcggtacagatat  
1-12tRNA-Asp(gtc)[168747,168819]

gacgaattagtagtggttagtatccctgcctgtcacgcaggagaccgg  
 ggttcaattccccgattcgtcgc  
 1-13tRNA-Leu(caa)[168820,168903]  
 gatagtgtagtcaagtgggtcaaagcgctggctcaagatccagtccttc  
 gggttcgcgggttcgactcccgctcgtatcacca  
 1-14tRNA-Thr(tgt)[168904,168976]  
 gccggttagcatagtggtattgcaccagcttctaactggaggccggg  
 agttcgatcctccaatcggcac

\*Podoviridae

>AF125520.1 Bacteriophage 933W, complete genome

1-1tRNA-Met(cat)[21120,21195]  
 gccctttagctcagtggtgagagcgagcgactcataatcgccaggtcgc  
 tggttcaatccagcaaggccacca  
 1-2tRNA-Arg(tcg)[21205,21281]  
 ccgccattagctcatcgggacagagcgccagccttgaagctggctgcgc  
 ggggttcgagtcctcgatggcggtcca  
 1-3tRNA-Arg(tct)[21295,21371]  
 gcgttgtagctcagccggacagagcaattgccttctgagcaatcggtca  
 ctggttcgaatccagtacaacgcgcca

>AF157835.1 Acyrthosiphon pisum bacteriophage APSE-1, complete genome

1-1tRNA-Lys(ttt)[32824,32898]  
 gggctgtagcttaacgatagagcagagggttttagcccttcgcttgcg  
 ggtttgagtcctgcacaggccgcca

>AY078382.2 Pseudomonas aeruginosa phage PaP3, complete genome

1-1tRNA-Asn(gtt)[1628,1703]  
 tgggatgtagctcagttggttagagcaggagctgtaactctcaggtcgt  
 aggttcgagccctaccgtcccagcca  
 1-2tRNA-Asp(gtc)[1708,1783]  
 ggccattaacttagcggtagagtgtcccctgtctaggagaagccgt  
 cgggtcgaatccgacatgggtcgcca  
 1-3tRNA-Tyr(gta)[1789,1875]  
 ggtcgtttagaggtagatggctactaccatccggtgtaaccggagcgc  
 ctaggctagaggttcaattcctcctcgaccacca  
 1-4tRNA-Pro(tgg)[1880,1955]  
 ctctcgtagctcagtcgtggttagagtcctgccttgggaagcaggaggtc  
 gtaggttcgaatcctaccgggtgac

>AY349011.3 Burkholderia cepacia phage Bcep22, complete genome

1-1tRNA-Ser(tga)[8351,8439]  
 ggaagcgttgagcattggcaggctccgcggattgaaatccgtcatacgt  
 gtgagcgtattgggggttcgactcccccgcttcgcca  
 1-2tRNA-Ala(tgc)c[53700,53799]  
 gtgcggttcgagcgccacggccttcgacgcggcggttctgcgcgccg  
 gctgatagatgccctcgggcaggttggcgatcgcttggcgaatgccgcg

>AY052766.1 Salmonella typhimurium bacteriophage ST64T, complete genome

1-tRNA-Asn(gtt)[21039,21113]  
gggtcagtcgtataaaggtcattacggaaggctgtaaccttctatcgt  
ggttcgagtcacgctgtcccacca

>AY095314.2 Vibriophage VpV262, complete genome  
1-tRNA-Pro(tgg)c[45250,45327]  
cggggtatgctcgagtcgttagcgaggtggcttggagccagcggtc  
gtaggttcgaatcctactaccccgacca

>AP000363.1 Enterobacteria phage VT2-Sakai proviral DNA, complete genome  
1-tRNA-Met(cat)[20611,20686]  
ggcccttagctcagtggtgagagcgagcgactcataatgccaggtcgc  
tggttcaaatccagcaagggccacca  
1-2tRNA-Arg(tcg)[20696,20772]  
ccgccattagctcatcgggacagagcgccagccttcgaagctggctgcgc  
ggggttcgagtcctcgtatggcgggtcca  
1-3tRNA-Arg(tct)[20786,20862]  
gcgttgtagctcagccggacagagcaattgccttctgagcaatcgggtca  
ctggttcgaatccagtacaacgcgcca

>AF547987.1 Enterobacteria phage Sf6, complete genome  
1-tRNA-Asn(gtt)[36065,36139]  
gggtcagtcgtataaaggtcattacggaaggctgtaaccttctatcgt  
ggttcgagtcacgctgtcccacca  
1-2tRNA-Thr(tgt)[36145,36220]  
gctggttagctccaatggttagagcagtcgccttgaagcgaatgggttag  
cggttcaagtcggttaaccagcacca

>DQ126339.2 Enterobacteria phage phiV10, complete genome  
1-tRNA-Arg(tct)c[2853,2929]  
gtggcattagctcagttggacagagcaaccgcttctaagcggttggtcg  
caggttcgaatcctgcatgccacgcca

>EF056009.1 Enterobacteria phage N4, complete genome  
1-tRNA-Asn(gtt)[32451,32525]  
gatggttagctcagtggttagagcagttggctgtaaccaactggtcgat  
ggttcgaatccatccaccatcgcca  
1-2tRNA-Ser(tga)[32531,32620]  
ggaaggtgtcagagaggccgattgtacgtgacttgaaatcaggaggcgc  
agagatgcacccgaaggttcgaatccttcaccttccacca  
1-3tRNA-Thr(tgt)[32625,32700]  
gctggttagctcagttggttagagcaattgccttgaagcaatgggtcaa  
tggttcaagtcattaaccagcacca  
1-4tRNA-Pro(tgg)[33054,33130]  
caggatatagctcagttggttagagcgtctgcttgggagcagaatgtcg  
taggttcgaatcctgctatcctgacca

>AB255436.1 Stx2-converting phage 86 DNA, complete genome  
1-tRNA-Met(cat)[59897,59972]  
ggcccttagctcagtggtgagagcgagcgactcataatgccaggtcgc

tggttcaaatccagcaaggccacca  
 1-2tRNA-Arg(tcg)[59982,60058]  
 ccgccattagctcatcgggacagagcgccagccttcgaagctggctgcgc  
 ggggttcgagtcctccgatggcgggtcca  
 1-3tRNA-Arg(tct)[60072,60148]  
 gcgttgtagctcagccggacagagcaattgccttctgagcaatcgggtca  
 ctggttcgaatccagtacaacgcgcca  
 >EU311208.1 Enterobacteria phage Min27, complete genome  
 1-1tRNA-Met(cat)[22825,22900]  
 ggcccttagctcagtggtgagagcgagcgactcataatcgccaggctcgc  
 tggttcaaatccagcaaggccacca  
 1-2tRNA-Arg(tcg)[22910,22986]  
 ccgccattagctcatcgggacagagcgccagccttcgaagctggctgcgc  
 ggggttcgagtcctccgatggcgggtcca  
 1-3tRNA-Arg(tct)[23000,23076]  
 gcgttgtagctcagccggacagagcaattgccttctgagcaatcgggtca  
 ctggttcgaatccagtacaacgcgcca  
 >DQ535032.1 Lactococcus lactis phage KSY1, complete genome  
 1-1tRNA-Met(cat)[70260,70332]  
 ggttcttagctcaataggcagagcatgcagcccataactgcaaaggcgt  
 aggttcaattcctacaggaacca  
 1-2tRNA-Arg(tct)[71312,71389]  
 tggatcttagctcaattggaattagcaacattcttctaaagttagg  
 ttactggttcgagtcagtaaggtccat  
 1-3tRNA-Gln(ttg)[77160,77232]  
 tggatatagtttagattggtagaacgcaggacttgaatcctgtagcat  
 tgggttcgagtcagttattccag  
 >EU124666.1 Thalassomonas phage BA3, complete genome  
 1-1tRNA-Ile(gat)c[13217,13316]  
 tggcgacttcagaatggctgaattatataatggctgataactattaca  
 cggacgatggcgacccgggttaaggaggttcattctcccggttgtaac  
 >EU330206.1 Enterobacteria phage phiEco32, complete genome  
 1-1tRNA-Arg(tct)c[66351,66427]  
 gcgcccttagttcaattggacagaacatcggttctaatccgtcggtta  
 caggttcgaatcctgtaggggtgcgcca  
 >AM910650.1 Pseudomonas phage LUZ24, complete genome  
 1-1tRNA-Pro(tgg)c[44603,44679]  
 ctctcgtagctcagttggttagagtgctgtcttggacacaggaggtcg  
 taggttcgagtcctaccgggtgacca  
 1-2tRNA-Tyr(gta)c[44684,44770]  
 ggtcgttagaggtagatggctactaccatccggctgtaacccggacgc  
 cattggctagaggttcaattccttcttcgaccacca  
 1-3tRNA-Asn(gtt)c[44776,44851]  
 tgggatgtagctcagttggttagagcaggagctgtaactctcaggtcgc

aggttcgagccctgccgtcccagcca  
 >FJ591094.1 Roseophage EE36P1, complete genome  
 1-tRNA-Pro(tgg)[72437,72513]  
 ccgtgtgtagcgcagctctggtagcgactagtttgggtactaggggtct  
 caggttcgaatcctgatacacggacca  
 1-2tRNA-Ile(gat)[72520,72595]  
 ggtgggtagctcagttggtagagcaggcgaccgataatcgtcaggtcga  
 aggttcaaacccttccccaccacca  
 1-3tRNA-Ser(tga)[72598,72687]  
 ggaagagtggccgagctctggctgaagacactggcttgaaaaccagcaaa  
 ccgaaagggttcgtgggtcgaatccacactcttccgcca  
 >EU794049.1 Bacteriophage APSE-2, complete genome  
 1-tRNA-Lys(ttt)[36173,36247]  
 gggctgttagcttaacgatagagctgaggcctttagcccatcgcttgcg  
 gggttgagtcctgcacagcccgcca  
 >FJ591093.1 Roseophage DSS3P2, complete genome  
 1-tRNA-Pro(tgg)[73610,73686]  
 ccgtgtatagcgcagctctggtagcgcatagtttgggtactataggtct  
 caggttcgaatcctgatacacggacca  
 1-2tRNA-Met(cat)[73693,73767]  
 ggtgggtagctcagaggtagagcggaggactcataatcctcatgtcgtt  
 ggttcgattccttccccaccacca  
 1-3tRNA-Ser(tga)[73770,73859]  
 ggaagagtggccgagctctggctgaaggcactggcttgaaaaccagcaaa  
 ccgaaagggttcgtgggtcgaatccacactcttccgcca  
 >FJ937737.2 Burkholderia cenocepacia phage BcepIL02, complete genome  
 1-tRNA-Ser(tga)[7204,7293]  
 ggaggcgtggcagagtggtctaatacagcggatttgaaatccgtcatagc  
 tgtgagcgtatcgtgagttcgaatctaccgcctccgcca  
 1-3tRNA-Ser(cga)c[23761,23856]  
 aggtcgtctgctgcgacggcgaggctggcgggttcgagctgctgcgt  
 tcgcgccggcacgacggcgaggcgttctgtacgcgttcgacctgc  
 >GU573886.1 Salmonella phage ST160, complete genome  
 1-tRNA-Asn(gtt)[20853,20927]  
 gggtcagtcgtataaaggtcattacggaaggctgtaaccttcttatcgt  
 ggttcgagtcacgctgtcccgcca  
 >HM997019.1 Salmonella phage 7-11, complete genome  
 1-tRNA-Arg(tct)[2456,2531]  
 gtttccatagcttaacggatagagcaacagccttctaagctgtcggttga  
 aggttcgaatccttctgggaacgcca  
 1-2tRNA-Asn(gtt)[2537,2612]  
 ggggtataagcacatatggatgtcgggtggactgttaaccaatggtagt  
 tgggtcgaatccaacattgccccgcca  
 1-3tRNA-Gln(ttg)[2620,2693]



agggatgtagtgaacggtagcacttcggactttgactccgacagcctag  
 gttcgaaacctagcgtccctgcc  
 1-4tRNA-Trp(cca)[2732,2805]  
 ggggtgattcgatagtggtattacgtggattccaacccagtcaccgga  
 gttcgattcttcgattgcccgcca  
 1-5tRNA-Met(cat)[2809,2886]  
 tgcgagttacagttctggtgaactggcagtcataaactgaataaag  
 gtaggttcgattcctgcactcgctcca  
 1-6tRNA-Phe(gaa)[3053,3127]  
 gcaaacatagctgagatggattagcgttgcctgaagagcttgagagctt  
 ggttcgattccaagtgttcacca  
 1-7tRNA-Cys(gca)c[81610,81685]  
 gggtagctggctgagtggttagcatcgattgcaaatccgaatcacac  
 ccgttcgaatcgggtgctaccctcca  
 >GU071102.1 Cyanophage NATL1A-7, complete genome  
 1-1tRNA-Gly(tcc)c[3479,3549]  
 gcgggtatagtttagaggtaaaactgcagcctccaagctgtgtcagcg  
 gttcgaatccgcttaccgct  
 >JN391180.1 Salmonella phage SPN1S, complete genome  
 1-1tRNA-Arg(tct)c[2813,2889]  
 gtggcattagctcagttggatagagcaaccgcttctaagcgttggccg  
 caggttcgaatcctgcacgccgacca  
 >JF900176.1 Salmonella phage SPN9CC, complete genome  
 1-1tRNA-Asn(gtt)[20191,20265]  
 gggtcagtcgtataaaggtcattacggaaggctgtaaccttctatcgt  
 ggttcgagtcacgctgtccagcca  
 1-2tRNA-Thr(tgt)[20271,20346]  
 gctggttagctccaatggttagagcagtcgcctgtaagcgaatgggtag  
 cggttcaagtcggttaaccagcacca  
 >JX415536.1 Escherichia phage ECBP2, complete genome  
 1-1tRNA-Arg(tct)c[67610,67685]  
 gcacccttagctcaatggatagagcagcgaccttctaagtcgttggttac  
 aggttcgaatcctgtagggcgacca  
 >JN662425.1 Burkholderia phage DC1, complete genome  
 1-1tRNA-Ser(tga)[8262,8351]  
 ggaggcgtggcagagtggtctaatagcagcggattgaaatccgtcatcag  
 tgcgagcgtatcgtgagttcgaatctaccgcctccgcca  
 >JX867715.1 Enterobacteria phage NJ01, complete sequence  
 1-1tRNA-Arg(tct)c[72679,72753]  
 gtccctatagttaaaaggatataacagatttcttctaaaaatccattcta  
 ggttcgagtcctagtggggacgcca  
 >JN882286.1 Cronobacter phage vB\_CsaP\_GAP52, complete genome  
 1-1tRNA-Asn(gtt)[2173,2248]  
 ggacgataagcacatatggatgtcggtagctgttaactcaatggtagt

tggttcgaatccaacatcgccgcca  
 1–2tRNA–Trp(cca)[2254,2327]  
 gggggtttggtataatggcattatgacggctcctccaaaaccgttgatagag  
 gttcgattcctctaacccccgcca  
 >JX415535.1 Escherichia phage ECBP1, complete genome  
 1–1tRNA–Ala(cgc)[34010,34081]  
 ggtcgaggtagcacgtaggcattgtgcagatggctgctacttctctcgctg  
 gttcgaatccagccccgacct  
 1–2tRNA–Cys(aca)[34373,34451]  
 gtgtgtatagctcaaataggtagagcgtgaggctacagtgtgaatggt  
 ttgtgggttcgattcccacccatgcctac  
 1–3tRNA–Ile(aat)[35154,35228]  
 gccacttagcttagacgggaaagcaaccgactaataatcggaaggtca  
 ctggttcaaatccagtagtgggtac  
 >HE664024.1 Escherichia phage P13374 complete proviral genome  
 1–1tRNA–Met(cat)[23592,23667]  
 ggcccttagctcagtggtgagagcgagcgactcataatcgccaggtcgc  
 tggttcaaatccagcaagggccacca  
 1–2tRNA–Arg(tcg)[23677,23753]  
 ccgccattagctcatcgggacagagcgccagccttgaagctggctgcgc  
 ggggttcgagtcctcgatggcgggtcca  
 1–3tRNA–Arg(tct)[23767,23843]  
 gcgttgtagctcagccggacagagcaattgccttctgagcaatcggtca  
 ctggttcgaatccagtacaacgcgcca  
 >JN939331.1 Brucella phage Tb, complete genome  
 1–1tRNA–Leu(cag)c[10121,10196]  
 gcgagcaggaggctcaggacggtcacggaactcagacttccgttcggtct  
 gctgatccttaacctgctcgttcg  
 >HQ641380.1 Enterobacter phage EcP1, complete genome  
 1–1tRNA–Asn(gtt)[55469,55543]  
 ggtaagttagctaataagtggaagcacctgactgttaatcagtgatagagt  
 ggttcgattccactactaccgcca  
 1–2tRNA–Pro(tgg)[55547,55623]  
 cgggatatagctcagtttggtagagtgtctgttgggagcagaatgtcg  
 ttggtcaagtccagctatcccgacca  
 1–3tRNA–Met(cat)[55628,55704]  
 gtgccttagctcagacggttagagcagccgactcataatcggtaggtca  
 caggttcaaatcctgtagggcgacca  
 >JQ011318.1 Escherichia phage TL–2011c, complete genome  
 1–1tRNA–Met(cat)[24095,24170]  
 ggcccttagctcagtggtgagagcgagcgactcataatcgccaggtcgc  
 tggttcaaatccagcaagggccacca  
 1–2tRNA–Pro(tgg)[24180,24256]  
 ccgccattagctcatcgggacagagcgccagccttgaagctggctgcgc

ggggttcgagtcctcgcgatggcggtcca  
 1–3tRNA–Arg(tct)[24270,24346]  
 gcgttgtagctcagccggacagagcaattgccttctgagcaatcggtca  
 ctggttcgaatccagtacaacgcgcca  
 >JQ446452.1 *Salinivibrio* phage CW02, complete genome  
 1–1tRNA–Arg(tct)[44194,44270]  
 gccccgttagttcaattggatagagcaacggccttctaagccgtgagtta  
 caggttcgaatcctgtacggggtcca  
 >HF543949.1 *Pseudomonas* phage vB\_PaeP\_p2–10\_Or1, complete genome  
 1–1tRNA–Asn(gtt)[553,628]  
 tgggatgtagctcagttggtagagcagatagctgtaactatccggtcgt  
 aggttcgagccctaccatcccagcca  
 1–2tRNA–Asp(gtc)[633,708]  
 ggccattaactcagcggtaagagtgtcccctgtctaggagaagtctg  
 gggttcgaatccccaatgggtcgcca  
 1–3tRNA–Pro(tgg)[713,787]  
 ctctcgtagctcagctcgttagagtcctgccttgaagcaggaggtc  
 gtaggttcgaatcctaccggggtga  
 >JX880034.1 *Enterobacter* phage IME11, complete genome  
 1–1tRNA–Ile(aat)c[27897,27972]  
 gtccacttagcttagacgggaaagcaaccgactaataatcggaaagtca  
 ctggttcaaaccagtagtgacacc  
 >JQ011317.1 *Escherichia* phage TL–2011b, complete genome  
 1–1tRNA–Arg(tct)c[14420,14496]  
 gtggcattagctcagttggacagagcaaccgccttctaagcggttggtcg  
 caggttcgaatcctgcatgccacgcca  
 >JX104231.1 *Burkholderia* phage BcepMig1, complete genome  
 1–1tRNA–Ser(tga)[7811,7898]  
 ggagcgtggcagagtggtttaatgtactggattgaaatccagcgacgg  
 taaccgcgtcgtgagttcgaatctaccgcctccgcca  
 >KC465900.1 *Pelagibacter* phage HTVC011P, complete genome  
 1–1tRNA–Leu(tag)[5592,5676]  
 gggcgagtggtggaattggtagacacgccagtccttaggaactggtgtcgc  
 aagacgtgtaggttcaaatcctatctcgcctacca  
 >HQ634194.1 *Vibrio* phage VBP47 genomic sequence  
 1–1tRNA–Trp(cca)[2550,2633]  
 gggggagtcccatagcggcaattggagcggttccaaaaccgttggtata  
 tccttcataggttcgagtcctatctccccgcca  
 >KC465901.1 *Pelagibacter* phage HTVC019P, complete genome  
 1–1tRNA–Cys(gca)c[8946,9019]  
 ggcaacgtggcgggaatggttacgcagtggttgcaaatctacatatccca  
 gttcaattctggcggtgcctcca  
 >HQ317387.2 *Sulfitobacter* phage phiCB2047–B genomic sequence  
 1–1tRNA–Arg(tct)c[56997,57073]

ggtcaccttagttcaactggatagaatgccccacttctaattggtaggttg  
taggttcgaatcctacagggactgcca  
1-2tRNA-Met(cat)[68618,68691]  
tgcgcgttggtgtaatggtaacacatttgggtcatgcccattaggctgagg  
gttcgattccctcactcgcaacca  
1-3tRNA-Tyr(gta)[68775,68857]  
gggacggctcatctattggcgaagataggagactgtaaatctctcggtaa  
actgtgctggttcgactccagcccgcccacca  
1-4tRNA-Trp(cca)[68872,68945]  
gccagcgtagtatttggattacagcggttccaaacccgaagaacaca  
gttcgattctgtgctctgggtcca  
1-5tRNA-Leu(tag)[68962,69039]  
gcccctctagcccaattggtaggagcggaatgttttagacacattacagt  
cccagttcgaatctggggaggggtacca  
1-6tRNA-Leu(caa)[69060,69136]  
gtcccgctgggcaaacggtaaagccgcagcactcaaaatgcttgatttcc  
ttggttcgaatccaaggcgggatacca  
1-7tRNA-Ser(gct)[69150,69238]  
ggaagaagaatctgttgggaacagaggctggtgctaaccagtacagggg  
gtctaactccttggggatcgtgacctccttcttcgccca  
1-8tRNA-Ser(tga)[69246,69333]  
ggatagtctcgctacgtgggtggcaaacggtctgaaaaccgtgatgact  
ccgaaaggatgaggggtcaactccttggctatccgccca  
1-9tRNA-Cys(gca)[69338,69415]  
gatcgtgtggctcgaatggctttaggcacggaattgcaaccccgaattat  
acaggttcgattcctgtcacgatctcca  
1-10tRNA-Gln(ttg)c[69436,69511]  
tgggaagtagcttaactggtaaagcccgtagctttgattcacgtgagtg  
aggttcgaaccctgccttcccaacca  
1-11tRNA-Phe(gaa)c[69768,69842]  
gcgtaggtagctcaggggtagagcttctggttgaagcccagagtcggt  
ggttcaattccatctctacgcacca  
1-12tRNA-Lys(ttt)c[69849,69925]  
gcgcggttagctcagttggttagagcaccgacttttaatcggggggtcc  
agagttcaagtctctgacggcacacca  
1-13tRNA-Ile(gat)c[69938,70011]  
attggattagctcagatggtagagcaacgggccgataaacccgtgtgtcac  
tgggtcaagtccagatccaatac  
1-14tRNA-Asn(gtt)c[70021,70097]  
ttcctatggcccctactggttaggggatgctggtgttaaccgtacagttc  
taggttcgagtcctagataggagacca  
1-15tRNA-Pro(tgg)c[70108,70183]  
caggggttagctcagcaggtagagtgctgcatttggaatgcagaagtcgc  
aggttcaagccctgccaccctgacca

1-16tRNA-Thr(tgt)c[70193,70268]  
gccgctatagctcagttggtagagcgctgccttgtaaacaggatgtcca  
gagttcaattctttgtggcggcacca

>JF974296.1 Pseudoalteromonas phage pYD6-A genomic sequence  
1-1tRNA-Met(cat)[13930,14007]  
ggccctaaagctcattaggtatgagcaccggctcataaccgggaggtag  
ataggttcgaatccttctagggtcacca  
1-2tRNA-Gln(ctg)[14014,14088]  
gtctccttagcttatgtaggtaaagcagtcgcccctgtggagtcctgc  
actggttcgaatccagtagaagaca

>HQ634196.1 Vibrio phage VBP32 genomic sequence  
1-2tRNA-Trp(cca)c[4581,4664]  
gggggagtcccatagcggcaattggagcggttccaaaaccgttggtata  
tccttcataagttcgagtcctatctccccgccca

>KF005317.1 Alteromonas phage vB\_AmaP\_AD45-P1, complete genome  
1-1tRNA-Met(cat)[53466,53541]  
gccctatagctcagcgtgtagagcagacgactcataatcgtaggtcac  
tggttcaaatccggttaggggcacca

>KC821633.1 Cellulophaga phage phi13:2, complete genome  
1-1tRNA-Cys(gca)c[63385,63457]  
gtgtgtactcaagtggttaagaggttagtctgcaaaactaatatcgtg  
agttcgaatctaccaacaactc

>KC821609.1 Cellulophaga phage phi17:2, complete genome  
1-1tRNA-Pro(tgg)[87649,87725]  
cgggtaatagaggagtcgtttatctcgctgcatttgggatgcagagca  
cgcaggttcgaatcctgcttatccgac  
1-2tRNA-Glu(ttc)[87805,87877]  
gctgccatcgtctaacggctaggacctcaggtttcatcctggtaatcgg  
agttcgattctccgtggcagtac  
1-3tRNA-Gln(ttg)[87948,88021]  
tggaatatggtgtaattggtaacacgtctggttttggtccagaagagtgg  
gggttcgagaccctctattccaac  
1-4tRNA-His(gtg)[88023,88097]  
gtgttagaagctaaagtggtcgaagcgtctggttggtccagaagatag  
tgagttcgagtcctcatttaacaccc  
1-5tRNA-Leu(tag)[88156,88231]  
gcagaggtgggtaaaactggtaaagccgcccgatttaggctcgggagttct  
gagggttcgagtcctctctctgtac  
1-6tRNA-Leu(taa)[88238,88319]  
gccccaatggtgaaactggttatacacgtagcacttaaatgctatgctt  
aggcttcaggttcgatccctgcttgagtag  
1-7tRNA-Arg(acg)[88324,88397]  
tttctcatagtttaactggaaaaacacaaagtacggcctttgagagtag  
gggttcgagtcctttgagaaaac

1-8tRNA-Ala(tgc)[88623,88696]  
ggcccagtagctaaactggcttagcacctccttgcaaggagaagtatgt  
gggttcgagcccatctggccac  
1-9tRNA-Lys(ttt)[88778,88850]  
accctcgtagcttaatggcaaagctcctctctttaagaggcgaccgca  
agatcagtagtctgtcgggggtac  
1-10tRNA-Ile(gat)[88953,89027]  
aggaaatagctcagttggttagagtacttcgctgataccgaagtgtca  
caagttcgaatctgttattctac  
1-11tRNA-Gly(tcc)[89131,89205]  
gcagcaatcgcatagcggcctattgcacctgacttccaatcaggatctcg  
tgagttcgaatctcacttgctgcac  
1-12tRNA-Met(cat)[89210,89284]  
agcgaggtagagcagctggttagctcgctaggctcataacctagaggtcg  
ggagttcgagtctccccttcgccac  
1-13tRNA-Asp(gtc)[89363,89436]  
agtctatcggccagtgagtgacgctgccctgtcacggcagagatcac  
gggttcgagtccttagactgc  
1-14tRNA-Thr(tgt)[89515,89589]  
tccctacgtagctcaattggtggagcactggtttgtaaaccaaaggttg  
tcggttcgagtcggacctaggatc  
1-15tRNA-Val(tac)[89736,89810]  
accagattagctcaggggttagagaactctttacaaggagaaggtcg  
atagttcgaatctatcattgttac  
1-16tRNA-Arg(tct)[89821,89894]  
gggggattagttaactggaaaactataggctctatcctatcgagtag  
gggttcgaatcccttatccccttc  
1-17tRNA-Met(cat)[89904,89978]  
ggccttagctcagttggttagagcagctcactcataatgagaaggtct  
caggttcgagtcctgactaggccac  
1-18tRNA-Tyr(gta)[90192,90276]  
gggacggttgctcggctggaagaggcgaggactgtaaattctgtaatcc  
actaggaatggaggttcgagtcctcctcgtcccac  
1-19tRNA-Ser(gct)[90546,90633]  
agaaagggtgcagagtggtttattgagctagggtgctaacttagtggagt  
gaaataccttcgtgggttcgaatccatcctttcttc  
1-20tRNA-Asn(gtt)[90675,90747]  
gacagggtagctcagtggttagagcaggagctgttaactctcaggtcgtg  
ggttcgaatccactctgtctc  
1-21tRNA-Trp(cca)[90809,90882]  
acttgagtagctcagttggttagagcagtggtctccaaaccaaaggtcgt  
aggttcgagtcctacctctcgtgc  
1-22tRNA-Phe(gaa)[90964,91038]  
ggggttgtagctgagttggtacaagcgtccgattgaagctcggaagtacg

aagggtcgaagccttcttccccac  
1-23tRNA-Ile(gat)[142711,142786]  
aatcgggtagttcaattggtagaacatcacactgataatgtgaaggtgt  
gggttcgagtcctatcccgattacca  
>KC438282.1 *Vibrio* phage JA-1, complete genome  
1-1tRNA-Arg(tct)[13653,13729]  
gtcctgttagtcaattggatagagcaagatgttctaccgtctaggtta  
taggttcgaatcctatacgggatgcca  
>KC139517.1 *Salmonella* phage FSL SP-058, complete genome  
1-1tRNA-Lys(ttt)[66706,66782]  
ggattgttaactcagttggttagagtatctcacttttaagagagggtcg  
aaggttcgagtccttcacaatccacca  
1-2tRNA-Pro(tgg)[66787,66863]  
caggatatagtctcagcttggttagagcatctgctttgggagcagactgtca  
gaggttcaagtctcttatcctgacca  
1-3tRNA-Tyr(gta)[66870,66953]  
gtggggtggcagagtggtcgattcgggggactgtaaatcctcactgaa  
aggcgcgggtggttcgaatccatcatccacacca  
1-4tRNA-Ser(gct)[66960,67045]  
ggaagattggcagagcgtaatgcagcaccctgctaaggtgtacaaccga  
aaggttgcataggttcaaatcctatatcttccgcca  
1-5tRNA-Met(cat)[67191,67268]  
ggttccatagctcaagttggttagagcactcggctcataaccgagagtg  
ccaggttcgaaaccgggtggaaccacca  
1-6tRNA-Ile(gat)[67272,67348]  
tgtctcatagctcagtaggtcagagcgttccctgataagggaaaggtca  
ctagttcgaatctagttgagacaacca  
1-7tRNA-Ser(tga)[67660,67745]  
ggaagattccgctcagttggtgggcaatccggttgaacccggaggtgctg  
gtaacggtaggggttcgactcctcaatcttccgcca  
1-8tRNA-Asn(gtt)[67751,67826]  
gatgggtagtctaactcggtaaagcaccagactgttaatctgcgacatta  
gggttcaaatccctatcccatcgcca  
1-9tRNA-Arg(tct)[68158,68234]  
gcatccttagctcagcaggatagagcagtagccttctaagctatttgtca  
ctggttcgaatccagtagggtgtacca  
1-10tRNA-Leu(taa)[68237,68322]  
gggagtatggtgaaatcggtagacacaaggatttaaatccctcggctt  
atagctgtacgagttcgagtctcgttactccacca  
>KC139520.1 *Salmonella* phage FSL SP-076, complete genome  
1-1tRNA-Lys(ttt)[61575,61651]  
ggattgttaactcagttggttagagtatctcacttttaagagagggtcg  
aaggttcgagtccttcacaatccacca  
1-2tRNA-Pro(tgg)[61656,61732]

caggatatagctcagcttggttagagcatctgcttgggagcagactgtca  
 gaggttcaagtcctcttatcctgacca  
 1-3tRNA-Tyr(gta)[61739,61822]  
 gtggggttggcagagtggtcgattgcgggggactgtaaatcctcactgaa  
 aggcgcggtggttcgaatccatcatcccacacca  
 1-4tRNA-Ser(gct)[61829,61914]  
 ggaagattggcagagcggaatgcagcaccctgctaagggtgacaaccga  
 aaggttgcataggttcaaactctatatcttccgcca  
 1-5tRNA-Met(cat)[62060,62137]  
 ggttccatagctcaagttggttagagcactcgggtcataaccgagagtgt  
 ccaggttcgaaaccgggtggaaccacca  
 1-6tRNA-Ile(gat)[62141,62217]  
 tgtctcatagctcagtaggtcagagcgttcccctgataagggaagggtca  
 ctagttcgaatctagttgagacaacca  
 1-7tRNA-Ser(tga)[62529,62614]  
 ggaagattccgctcagtggtgggcaatccggttgaaccgagggtgctg  
 gtaacggtaggggttcgactcctcaatcttccgcca  
 1-8tRNA-Asn(gtt)[62620,62695]  
 gatgggtagctaactcggtaaagcagcagactgttaatctgtgatatta  
 gggttcaaatccctatcccatcgcca  
 1-9tRNA-Arg(tct)[63027,63103]  
 gcatccttagctcagttggatagagcagtagccttctaagctattgtca  
 ctggttcgaatccagtaggggtgacca  
 1-10tRNA-Leu(taa)[63106,63191]  
 gggagtatggtgaaatcggtagacacaagggaattaaaatccctcgggtt  
 atagctgtacgagttcagctctcgttactcccacca  
 >KC821608.1 Cellulophaga phage phi19:3, complete genome  
 1-1tRNA-Cys(gca)c[67343,67415]  
 gttgttactcaagtggtaagaggttagtctgcaaaactaatatcgtg  
 agttcgaatctaccaacaactc  
 >KC821614.1 Cellulophaga phage phi38:1, complete genome  
 1-2tRNA-Glu(ttc)c[28604,28676]  
 gctcttttcgtctagcggtaaggacattcggttttcatccgaaaaacata  
 ggttcgaatcctatagaggtac  
 1-3tRNA-Glu(ttc)c[30574,30646]  
 gctcttttcgtctagcggtaaggacattcggttttcatccgaaaaacata  
 ggttcgaatcctatagaggtac  
 1-4tRNA-Lys(ttt)[35522,35595]  
 gccctttagcaaacaggtttaggcaaccgtcttttaaacggtggggct  
 aggttcgattcctagcaggggcac  
 1-5tRNA-Ile(gat)[35644,35717]  
 tggagtatagctcagcggtagagcactcccctgatacgggagatgtcgt  
 aggttcgaaaccttactccaac  
 1-6tRNA-Gly(tcc)[35805,35878]



gcgtaagaggccatagtggaatggcgcctgcctccaagtaggagatagc  
gagttcgaacctcgcttacgctc

1-7tRNA-Met(cat)[35888,35957]

tgtgggtggtcgtgggtaccagaggcctcataagtccttatagatgggt  
tcgactcccataccgccac

1-8tRNA-Asp(gtc)[36032,36109]

ggctctaataagcgtgttggaacacgaattgcactgtcactgctctaaa  
acgagggttcgaatccctcttagaccgc

1-9tRNA-Thr(tgt)[36119,36193]

gcactaatgactgaataggaaatggacttcattgtaacgaagataatt  
cgggttcgactcctgattagtgtc

1-10tRNA-Val(tac)[36402,36476]

accagattagctcagcggtttagagcagctctttacaaggagaaggctc  
atagttcgaatctatcattgtgtac

1-11tRNA-Arg(tct)[36537,36608]

acctctatagtttaaaggaagaatacggcgttctaacgctatggtcggg  
gttcgaatccctgtagagggtc

1-12tRNA-Ser(tga)[37020,37110]

ggaagagtaagccaagtaggtctactggtcgctgtcttgaaaacagttgg  
ggtttaaaagcccgtgtgggttcgagccccacttcttccgc

1-13tRNA-Ser(gct)[37115,37200]

agagaggtgtctgagtgcttaaggtactacttgcctaaagtagtgggt  
taacgcctccgagggttcgaatcccttcttctac

1-14tRNA-Asn(gtt)[37209,37281]

ggctaggtagctcagaggaagagcaggcgcctgtaagcgtcaggtcgag  
atatcgtaattctccctagcctc

1-15tRNA-Phe(gaa)[37440,37513]

gcgtagaagctaacttggtagaagcactggcttgaaatcccagaggagt  
agggtcgattcctacatcgcac

1-16tRNA-Pro(tgg)[38141,38213]

cgagtagtgacaaaattggcacgtgccaccttggacgtcggagaatgca  
ggttcgatccctgcctactcgac

1-17tRNA-Glu(ttc)[38222,38297]

gctatcgtcttctaaatggaataggaatccacccttcaaggtgtgcaat  
gcgagttcaagtcgtcgatagtac

1-18tRNA-Gln(ttg)[38343,38415]

tggagtatgatgaacggtagcatgactggtttgagccagttcgtcgg  
ggttcgaatccctgtactccatc

1-19tRNA-His(gtg)[38426,38502]

cctccgttgcgccaattggaaaggcggtaagctgtgaacttgattaca  
tgggttcgattcccatcaggttgcca

1-20tRNA-Leu(taa)[38631,38714]

gcatccatgggtgaaaggctatacactacaggcttaaacctgtcgccg  
aaaggattgggggttcgaatccctctggatgcac

1-21tRNA-Arg(acg)[38721,38793]  
 acttctatagcttaacgaaaagcgttccgctacgaacggatagattggg  
 ggttcgaatccctctagaagttc  
 >KC821632.1 Cellulophaga phage phi4:1, complete genome  
 1-1tRNA-Pro(tgg)[87196,87272]  
 cgggtaatagaggagctcggtttatctcgctgcatgtggatgcagagca  
 cgcaggttcgaatcctgcttatccgac  
 1-2tRNA-Glu(ttc)[87352,87424]  
 gctgccatcgtctaacggctaggacctcaggtttcatcctggaatcgg  
 agttcgattctccgtggcagtac  
 1-3tRNA-Gln(ttg)[87495,87568]  
 tggaatatggtgaattggtaacacgtctggttttggccagaagagtgg  
 gggttcgagaccctctattccaac  
 1-4tRNA-His(gtg)[87570,87644]  
 gtgttagaagctaaagtggcgaagcgtctggttggtccagaagatag  
 tgagttcgagctcatttaacaccc  
 1-5tRNA-Leu(tag)[87703,87778]  
 gcagaggtgggtaaactggtaaagccgccgatttaggatcgggagttct  
 gagggttcgactccctctctctgtac  
 1-6tRNA-Leu(taa)[87785,87866]  
 gccccaatggtgaaactggtatacacgtagcacttaaatgctatgctt  
 aggcttcaggttcgatccctgcttggggtag  
 1-7tRNA-Arg(acg)[87871,87944]  
 ttctcatagtttaactggaaaaacacagagtacggcctttgagagtag  
 gggttcgagtcctttgagaaaac  
 1-8tRNA-Ala(tgc)[88170,88243]  
 ggcccagtagctaaactggcttagcacctccttgcaaggagaagtatgt  
 gggttcgagccccatctggccac  
 1-9tRNA-Lys(ttt)[88325,88397]  
 accctcgtagcttaatggcaaagctcctcttttaaagaggcgaccgca  
 agatcgggtactgtcggggtag  
 1-10tRNA-Ile(gat)[88687,88761]  
 aggaatatagctcagttggttagagtacttcgctgataccgaagatgtca  
 caagttcgaatctgttattctac  
 1-11tRNA-Gly(tcc)[88865,88939]  
 gcagcaatcgcatagcggcctattgcacctgacttccaatcaggatctcg  
 tgagttcgaatctcacttgctgcac  
 1-12tRNA-Met(cat)[88944,89018]  
 agcgagtagagcagctggttagctcgctaggctcataacctagaggtcg  
 ggagttcgagctcccccttcgccac  
 1-13tRNA-Asp(gtc)[89097,89170]  
 agtctatcggtccagtgagtgacgctgccctgtcacggcagagatcac  
 gggttcgagtcctgatatagactgc  
 1-14tRNA-Thr(tgt)[89249,89323]

tcctacgtagctcaattggaggagcactggtttgtaaaccaaaggtg  
tcggttcgagtcgacctagggatc  
1-15tRNA-Val(tac)[89470,89544]  
accagattagctcaggggttagagcaactctttacaaggagaaggtcg  
atagttcgaatctatcatttggtac  
1-16tRNA-Arg(tct)[89555,89628]  
gggggattagttaactggaaaaactataggctctatcctatcgagtag  
gggttcgaatcccttatccccttc  
1-17tRNA-Met(cat)[89638,89712]  
ggcctttagctcagttggtagagcagtcactcataatgagaaggtct  
caggttcgagtcctgactaggccac  
1-19tRNA-Tyr(gta)[89926,90010]  
gggacggttgctcggctggaaggcgagcagactgtaaattctgtaatcc  
actaggaatggaggttcgagtcctcctcgccccac  
1-20tRNA-Ser(gct)[90280,90367]  
agaaaggtgtcagagtggttattgagctaggtgctaacttagtgaggt  
gaaataccttcgtgggttcgaatccatccttcttc  
1-21tRNA-Asn(gtt)[90397,90485]  
tcttgagttgccgtagttggccgaacggtccagactgttaatctggtgag  
atctatcctcatcgtaggttcgaatcctacctaagagc  
1-22tRNA-Trp(cca)[90629,90702]  
acttgagtagctcagttggttagagcagtggtcctcaaaaccaaaggtcgt  
aggttcgagtcctacctctctgtgc  
1-23tRNA-Phe(gaa)[90724,90798]  
ggggtttagctgagttggtacaagcgtccgattgaagctcggaagtacg  
aagggtcgaagccttcctccccac  
1-24tRNA-Ile(gat)[143233,143308]  
aatcgggtagttcaattggtagaacatcacactgataatgtgaagttgt  
gggttcgagtcctccatcccgattacca

>KF856712.1 Pseudomonas phage phiIBB-PAA2, complete genome

1-1tRNA-Pro(tgg)c[44350,44426]  
ctcctcgtagctcagttggttagagtcctgtcttgacacaggaggtcg  
taggttcgagtcctaccgggtgacca  
1-2tRNA-Asp(gtc)c[44431,44506]  
ggccatttaactcagcgggttagagtgctcccctgtctaggagaagccgt  
cgggttcgaatccgacatgggtcgcca  
1-3tRNA-Ile(gat)c[44511,44586]  
tgggatgtagctcagttggttagagcaggagccgataactctcaggtcgt  
aggttcgagccctaccgtcccaacca

>HG518155.1 Pseudomonas phage TL complete genome

1-1tRNA-Pro(tgg)c[44641,44717]  
ctcctcgtagctcagttggttagagtcctgtcttgacacaggaggtcg  
taggttcgagtcctaccgggtgacca  
1-2tRNA-Tyr(gta)c[44722,44808]

ggtcgtttagaggtatggctactaccatccggtgtaaccggacgc  
 cttaggctagaggtcaattccttcctcgaccacca  
 1–3tRNA–Asn(gtt)c[44814,44889]  
 tgggatgtagctcagttggtagagcaggagctgtaactctcaggtcgt  
 aggttcgagccctaccatcccagcca  
 >KF787095.1 Achromobacter phage JWA1alpha, complete genome  
 1–1tRNA–Arg(tct)[18757,18852]  
 ggcgtagtggtggaattggtaaacacagagtccttctccggactccgagc  
 gtagccgcgaggtgctcttcgaggttcgactcctgcctacaatgcc  
 >KF981730.1 Escherichia phage KBNP1711, complete genome  
 1–1tRNA–Arg(tct)c[66381,66455]  
 gtcctatagttaaaaggatataacagatttcttctaaaaatccattcta  
 ggttcgagtcctagtgaggacgcca  
 >KF806588.1 Erwinia phage Ea9–2, complete genome  
 1–1tRNA–Asn(gtt)[41009,41084]  
 gacgggttagttcagcaggtagaacggtggactgtaatccatatgtcat  
 cggttcgaatccggtactcgtcgcca  
 1–2tRNA–Glu(ttc)[41091,41167]  
 attcccgtagacaaattggtatagtcaccacactttcactgtgggatctg  
 tgggtcaagtcccatcggaatgcca  
 1–3tRNA–Asp(gtc)[41174,41249]  
 agtcctatagttcagtcggtagaatacctccctgtcacggagaaggtcac  
 gggttcgagtcggttaggactgcca  
 1–4tRNA–Ile(gat)[41253,41328]  
 tgctcatagctcagttggtagagcaaccgcccataagcggtaggtcac  
 tgggtcaagtccagttgaagcaacca  
 1–5tRNA–Tyr(gta)[41504,41585]  
 gggggattagtcaagcggtcgaagacggcagactgtaaatctgttatccc  
 acacggtagttcgaatctaccatccccacca  
 1–6tRNA–Ser(gct)[41689,41780]  
 ggaagattggctgagtggtctaaaagcgtccggtgtaaccggaaggcgg  
 cgtaacagcttcccactgggtcgaatccagtatcttctcca  
 1–7tRNA–Lys(ttt)[41786,41862]  
 aggtcgttagctcagttggttagagcaccggacttttaacgggtgtca  
 ttggttcgaggccaatacgacctacca  
 >KJ192399.2 Vibrio phage CHOED, complete genome  
 1–1tRNA–Asn(gtt)[55857,55933]  
 ggataagaagcataagtggtatatgcgctcgctgtaagcgaagatag  
 agagttcgaacctctcctgtccgcca  
 1–2tRNA–Ser(gct)[55939,56028]  
 agagaagtgtcccgagtggtttaaaggcctccctgtaaggaggtgggcg  
 ttaatccgctccgtgggtcaaatcccactttctctgcca  
 1–3tRNA–Pro(tgg)[56641,56717]  
 cgggatgtaatgtcaattggtagacggctcgcttgggaagcgagaggttg

aaggttcgagtccttccatcccgacca

>KF192075.1 Escherichia phage vB\_EcoP\_PhAPEC5, complete genome  
1-tRNA-Ile(aat)[34700,34778]  
tgtccgcttagcttagactgggaaagcaaccgactaataatcggaaggtc  
actggttcaatccagtagtggacacca

>KJ135004.2 Enterobacteria phage Bp4, complete genome  
1-tRNA-Ile(aat)c[37009,37083]  
gccacttagcttagacgggaaagcaaccgactaataatcggaaggtca  
ctggttcaatccagtagtgggtac  
1-2tRNA-Cys(aca)c[37785,37863]  
gtgtgtgatagctcaaataggtagagcgtgaggctacagtgtgaatggt  
ttgtgggttcgattcccacccatgcctac  
1-3tRNA-Ala(cgc)c[38155,38226]  
ggtcgaggtagcacgtaggcatgtgcagatggctgctacttctctcgctg  
gttcgaatccagccccgacct

>KJ621082.2 Dinoroseobacter phage DFL12phi1, complete genome  
1-tRNA-Pro(tgg)c[59148,59225]  
cggaatgtaggctagctcgttaagtcgctcggttgggaccgagaaatc  
gaaggttcgaatccttccattccgacca  
1-2tRNA-Ile(gat)c[59229,59304]  
tgtggtgtagctcagttggtagagcgttcgaccgataatcgaaatgtcgc  
tggttcaagtcagccaccacaacca

>KF562340.1 Escherichia phage vB\_EcoP\_PhAPEC7, complete genome  
1-tRNA-Ile(aat)[35085,35163]  
tgtccgcttagcttagactgggaaagcaaccgactaataatcggaaggtc  
actggttcaatccagtagtggacacca

>KM199771.1 Mesorhizobium phagevB\_MloP\_Lo5R7ANS, complete genome  
1-tRNA-Leu(tag)[8569,8654]  
gcgggtatggtggaattggtagacacgcttggttaggtccaagtgcctg  
aaaagcttgggggttcgagtccttaccgcacca

>LN610578.1 Pseudomonas phage vB\_PaeP\_C2-10\_Ab22, complete genome  
1-tRNA-Pro(tgg)c[44812,44888]  
ctctcgtagctcagttggttagagtgctgtcttgacacaggaggtcg  
taggttcgagtcctaccgggtgacca  
1-2tRNA-Tyr(gta)c[44893,44979]  
ggtcgttagaggtagatggctactaccatccggctgtaacccggacgc  
cattggctagaggttcaattccttcttcgaccacca  
1-3tRNA-Asn(gtt)c[44985,45060]  
tgggatgtagctcagttggtagagcaggagctgtaactctcaggtcgc  
aggttcgagccctgccgtcccagcca

>KM236242.1 Escherichia phage Pollock, complete genome  
1-tRNA-Pro(tgg)[64673,64749]  
cggaatgtagcacagccggtagtgcactctgcttgggagcagagggtca  
taggttcaatcctatcattccgacca

1-2tRNA-Met(cat)[64756,64832]  
 tcccgttagcttaattggttaaagcaccgactcataatcgatgatta  
 caggttcgaatcctgtcacgggaacca

1-3tRNA-Arg(tct)[64837,64912]  
 gcaccccttagctcaatggatagagcagtagccttctaagctattggttac  
 aggttcgaatcctgtaggatgcacca

1-4tRNA-Leu(taa)[64918,65002]  
 gggagtatggtgaaattggtaaacacaaggattaaaatccctcgctta  
 attgcttacgagttcgagtcctgttactcccacca

>KM044272.1 Phage vB\_EcoP\_SU10, complete genome

1-1tRNA-Arg(tct)c[66656,66731]  
 gcgctcttagctcaatggatagagcagtagccttctaagctattggttac  
 aggttcgagtcctgtaggcgccacca

>HM208303.1 Stx2 converting phage vB\_EcoP\_24B, complete genome

1-1tRNA-Met(cat)[21679,21754]  
 ggcccttagctcagtggtgagagcgagcgactcataatcgccaggtcgc  
 tggttcaaatccagcaaggccacca

1-2tRNA-Arg(tcg)[21764,21840]  
 ccgcattagctcatcgggacagagcgccagccttgaagctggctgcgc  
 ggggttcgagtcctcgatggcggtcca

1-3tRNA-Arg(tct)[21854,21930]  
 gcgttgtagctcagccggacagagcaattgccttctgagcaatcggtca  
 ctggttcgaatccagtacaacgcgcca

>KP682371.1 Escherichia phage PA2, complete genome

1-1tRNA-Met(cat)[27123,27198]  
 ggcccttagctcagtggtgagagcgagcgactcataatcgccaggtcgc  
 tggttcaaatccagcaaggccacca

1-2tRNA-Arg(tcg)[27208,27284]  
 ccgcattagctcatcgggacagagcgccagccttgaagctggctgcgc  
 ggggttcgagtcctcgatggcggtcca

1-3tRNA-Arg(tct)[27298,27374]  
 gcgttgtagctcagccggacagagcaattgccttctgagcaatcggtca  
 ctggttcgaatccagtacaacgcgcca

>KR063278.1 Gordonia phage GMA7, complete genome

1-1tRNA-Asn(gtt)[13362,13435]  
 tgtgatatagctcaattggcagagcgctggactgttaatccggtagtga  
 aggttcgagtccttctatcacagc

>KT206225.1 Mycobacterium phage Phlei, complete genome

1-1tRNA-Asn(gtt)[5706,5781]  
 tgatctgtagctcaatcggcagagcggtccctgttaaggagttggttgg  
 aggttcgagtcctcccagatcagcca

1-2tRNA-Trp(cca)[5819,5892]  
 gcgttcctagctcaattggtagagcgaggtctccaaagccgttggttcc  
 aggttcgagtcctggggggcgcg

1-3tRNA-Gln(ctg)[5945,6017]  
 tgctcattcgtctaaccggcaagacaccgggttctggccccggcaatcca  
 ggttcaaatcctgggtgagcagc

>KF971864.1 Escherichia phage phi191, complete genome  
 1-1tRNA-Arg(tct)c[10036,10112]  
 gcgttgttagctcagccggacagagcaattgccttctgagcaatcgggtca  
 ctggttcgaatccagtacaacgcgcca  
 1-2tRNA-Arg(tcg)c[10126,10203]  
 ccgccattagctcatcgggacagagcgccagccttcgaagctggctgcgc  
 ggggttcgagtcctcggatggcgggtcca  
 1-3tRNA-Met(cat)c[10213,10288]  
 ggcccttagctcagtggtgagagcgagcgactcataatcgccaggtcgc  
 tggttcaaatccagcaaggccacca

>HQ424691.1 Enterobacteria phage VT2phi\_272, complete sequence  
 1-1tRNA-Arg(cct)c[1320,1394]  
 gtctcttagttaaattggatataacgagccccctctaagggttaattgca  
 ggttcgattcctgcaggggacacca  
 1-2tRNA-Met(cat)[27183,27258]  
 ggcccttagctcagtggtgagagcgagcgactcataatcgccaggtcgc  
 tggttcaaatccagcaaggccacca  
 1-3tRNA-Arg(tcg)[27268,27344]  
 ccgccattagctcatcgggacagagcgccagccttcgaagctggctgcgc  
 ggggttcgagtcctcgalggcgggtcca  
 1-4tRNA-Arg(tct)[27358,27434]  
 gcgttgttagctcagccggacagagcaattgccttctgagcaatcgggtca  
 ctggttcgaatccagtacaacgcgcca

>KT630648.2 Salmonella phage SEN22, complete genome  
 1-1tRNA-Asn(gtt)[37726,37800]  
 gggtcagtcgtataaaggttattacggaaggctgttaaccttctatcgt  
 ggttcgagtcacgctgtcccgcga  
 1-2tRNA-Thr(tgt)[37806,37881]  
 gctggttagctccaatggttagagcagtcgccttgaagcgaatgggtag  
 cgggtcaagtcggttaaccagcacca

>KR054029.1 Pseudomonas phage DL54, complete genome  
 1-1tRNA-Ile(gat)[888,963]  
 tgggatgtagctcagttggttagagcagggagccgataactctcaggtcgt  
 aggttcgagccctaccgtcccaacca  
 1-2tRNA-Asp(gtc)[968,1043]  
 ggccattaactcagcggtagagtgtcccctgtctaggagaagccgt  
 cgggtcgaatccgacatgggtcgcca  
 1-3tRNA-Pro(tgg)[1048,1124]  
 ctctcgtagctcagttggttagagtcctgtcttgacacaggaggtcgc  
 taggttcgagtcctaccgggtgacca

>KP233880.1 Pseudomonas phage PhiCHU, complete genome

1-tRNA-Pro(tgg)c[44654,44729]  
 ctctcgtagctcagtcctggttagagtcctgccttggaagcaggaggtc  
 gtaggttcgaatcctaccgggtgac

1-tRNA-Asp(gtc)c[44734,44809]  
 ggccattaactcagcggtaagagtgtcccctgtctaggagaagtctg  
 gggttcgaatcccaatgggtcgcca

1-tRNA-Asn(gtt)c[44814,44889]  
 tgggatgtagctcagttggttagagcaggtagctgtaactatcagtcgt  
 aggttcgagccctaccgtcccagcca

>KP308307.1 Escherichia phage 172-1, complete genome

1-tRNA-Arg(tct)c[75402,75478]  
 gcgccgttagctcaattgtatagacagttccttctaagaaattggttg  
 gaggttagaatcctccacggtgcgcca

>KU878967.1 Salmonella phage 118970\_sal4, complete genome

1-tRNA-Asn(gtt)[20486,20560]  
 gggtcagtcgtataaaggtcattacggaaggctgtaaccttctatcgt  
 ggttcgagtcacgctgtccagcca

1-tRNA-Thr(tgt)[20566,20641]  
 gctggttagctccaatggttagagcagtcgccttgtaagcgaatgggtag  
 cggttcaagtcggttaaccagcacca

>LT594300.1 Escherichia phage LM33\_P1 genome assembly, chromosome: I

1-tRNA-Thr(cgt)[11104,11182]  
 gtctccatagctcaaaggtagagcggcgggtcgtgatggcctattgcga  
 ttagggttcgaatccccgtggagacgcca

>KU927494.1 Salmonella Phage 103203\_sal5, complete genome

1-tRNA-Asn(gtt)[40369,40442]  
 tgggtcagtcgtataaaggtcattacggaaggctgtaaccttctatcg  
 tggttcagtcacgctgtccaga

>KX098389.2 Erwinia phage vB\_EamP\_Frozen, complete genome

1-tRNA-Asn(gtt)[40868,40943]  
 gacgggttagctcagttggttagagcattgactgtaataattggtcat  
 cggttcaaatccgtactcgtcgcca

1-tRNA-Glu(ttc)[40950,41026]  
 attcccgtagacaaattggtacagtcaccacactttcactgtggagtttg  
 tgggttcaagtcctccatcggaatgcca

1-tRNA-Asp(gtc)[41033,41108]  
 agtcctatagttcagtcggtagaatacctccctgtcacggagaaggtcac  
 gggttcgagtcctgtagactgcca

1-tRNA-Ile(gat)[41112,41187]  
 tgctcatagctcagtggttagagcaaccgcccataagcggtaggtcac  
 tggttcaagtcagttgaagcaacca

1-tRNA-Tyr(gta)[41446,41527]  
 gggggattagtcgaagcggtcgaagacggcagactgtaaatctgttatccc  
 acacggtagttcgaatctatcatccccacca



1-6tRNA-Pro(tgg)[41532,41608]  
cggcatttagctcagtttggcagagcatcggcttgggagtcgagggtcg  
aaggttcaaatccttcagtgccgacca

1-7tRNA-Ser(gct)[41614,41705]  
ggaagattggctgagtggtctaaagcgtccggtgctaaccggaaggcgg  
tgtaacagcttcccactggttcgaatccagtatcttctcca

1-8tRNA-Lys(ttt)[41711,41787]  
aggtcgttagctcagttggttagagcaccggacttttaaccggatgtca  
ttggttcgaggccaatacgacctacca

>AP005154.1 Stx2 converting phage II DNA, complete genome

1-1tRNA-Met(cat)[52499,52574]  
ggccctttagctcagtggtgagagcgagcgactcataatcgccaggtcgc  
tggttcaaatccagcaagggccacca

1-2tRNA-Arg(tcg)[52584,52660]  
ccgccattagctcatcgggacagagcgccagcctcgaagctggctgcgc  
ggggttcgagtcctcgatggcggtcca

1-3tRNA-Arg(tct)[52674,52750]  
gcgttgtagctcagccggacagagcaattgccttctgagcaatcggtca  
ctggttcgaatccagtacaacgcgcca

>AP013406.1 Uncultured Mediterranean phage uvMED DNA, complete genome, group G15, isolate:  
uvMED-CGR-U-MedDCM-OCT-S46-C34

1-1tRNA-Pro(tgg)c[25878,25954]  
ctgcgtgtggcggagcctggtaccgcatctgcttgggagcagaggatcg  
ctggttcaaatccagccacgcagacca

>AP013543.1 Uncultured Mediterranean phage uvMED DNA, complete genome, group G8, isolate:  
uvMED-CGR-U-MedDCM-OCT-S30-C28

1-1tRNA-Leu(tag)c[37322,37406]  
ggggcgatggtggaattggttagacacgccagtccttaggaactggtctttt  
acgaggtgaaggttcgagtccttttcgcctacca

>AP013396.1 Uncultured Mediterranean phage uvMED DNA, complete genome, group G15, isolate:  
uvMED-CGR-C99-MedDCM-OCT-S44-C25

1-1tRNA-Pro(tgg)c[24212,24288]  
ctgggtgtagcgaagcctggtatcgactagcttgggagctagggatcg  
ttggttcaaatccaaccaccagacca

>AP013400.1 Uncultured Mediterranean phage uvMED DNA, complete genome, group G15, isolate:  
uvMED-CGR-U-MedDCM-OCT-S30-C37

1-1tRNA-Pro(tgg)[32296,32372]  
ctgggtgtagcgaagcctggtatcgacctggttgggaccaggggatcg  
gaggttcaaatcctccaccagacca

>AP004402.1 Stx2 converting phage I DNA, complete genome

1-1tRNA-Met(cat)[52865,52940]  
ggccctttagctcagtggtgagagcgagcgactcataatcgccaggtcgc  
tggttcaaatccagcaagggccacca

1-2tRNA-Arg(tcg)[52950,53026]

ccgccattagctcatcgggacagagcgccagccttcgaagctggctgcgc  
 ggggttcgagtcctcgatggcggcca  
 1–3tRNA–Arg(tct)[53040,53116]  
 gcgttgtagctcagccggacagagcaattgccttctgagcaatcggtca  
 ctggttcgaatccagtacaacgcgcca  
 >HF569091.1 Brucella phage Tb complete sequence, isolate BfR  
 1–1tRNA–Leu(cag)c[8179,8254]  
 gcgagcaggaggctcaggacggtcacggaactcagactccgttcggtct  
 gctgatccttaacctgctcgttcg  
 >KC556897.1 Brucella phage Tb, complete genome  
 1–1tRNA–Leu(cag)c[10121,10196]  
 gcgagcaggaggctcaggacggtcacggaactcagactccgttcggtct  
 gctgatccttaacctgctcgttcg  
 >KC438283.1 Vibrio phage VCO139, complete genome  
 1–1tRNA–Arg(tct)[13346,13422]  
 gtctgttagctcaattggatagagcaagatgtttctaccgtctaggtta  
 taggttcgaatcctatacgggatgcca  
 >KT962247.1 Cellulophaga phage phi17:2\_18, complete genome  
 1–1tRNA–Pro(tgg)[87649,87725]  
 cgggtaatagaggagtctggtttatctcgtgcatttgggatgcagagca  
 cgcaggttcgaatcctgcttatccgac  
 1–2tRNA–Glu(ttc)[87805,87877]  
 gctgccatcgtctaacggctaggacctcaggtttcatcctggtaatcgg  
 agttcgattctccgtggcagtac  
 1–3tRNA–Gln(ttg)[87948,88021]  
 tggaatatggtgtaattggtaacacgtctggttttggtccagaagagtgg  
 gggttcgagaccctctattccaac  
 1–4tRNA–His(gtg)[88023,88097]  
 gtgttagaagctaaagtggcgaagcgtctggttggtccagaagatag  
 tgagttcgagtcctttaaaccac  
 1–5tRNA–Leu(tag)[88156,88231]  
 gcagaggtgggtaaaactggtaaaagccgccgatttaggctcgggagttct  
 gagggttcgagtcctctctgtac  
 1–6tRNA–Leu(taa)[88238,88319]  
 gccccaatgggaaactgggtatacacgtagcacttaaaatgctatgctt  
 aggcttcaggttcgatccctgcttgagtac  
 1–7tRNA–Arg(acg)[88324,88397]  
 ttctcatagtttaactggaaaaacacaaagtacggcctttgagagtag  
 gggttcgagtcctttgagaaaac  
 1–8tRNA–Ala(tgc)[88623,88696]  
 ggcccagtagctaaactggcttagcacctccttgcaaggagaagtatgt  
 gggttcgagccccatctggccac  
 1–9tRNA–Lys(ttt)[88778,88850]  
 accctcgtagcttaatggcaaagctcctcttttaagaggcgaccgca

agatcagctactgtcgggggtac  
 1-10tRNA-Ile(gat)[88953,89027]  
 aggaatatagctcagttggttagagtacttcgctgataccgaagatgtca  
 caagttcgaatctgttattcctac  
 1-11tRNA-Gly(tcc)[89131,89205]  
 gcagcaatcgcatagcggcctattgcacctgacttccaatcaggatctcg  
 tgagttcgaatctcacttgctgcac  
 1-12tRNA-Met(cat)[89210,89284]  
 agcgaggtagagcagctggtagctcgctaggctcataacctagaggtcg  
 ggagttcgagtctccccttcgccac  
 1-13tRNA-Asp(gtc)[89363,89436]  
 agtctatcgggtccagtgagtgagcgtgccctgtcacggcagagatcac  
 gggttcgagctccgtatagactgc  
 1-14tRNA-Thr(tgt)[89515,89589]  
 tccctacgtagctcaattggtggagcactggtttgtaaaccaaaggttg  
 tcggttcgagtcggacctaggatc  
 1-15tRNA-Val(tac)[89736,89810]  
 accagattagctcaggggttagagaactctttacaaggagaaggtcg  
 atagttcgaatctatcattgtgtac  
 1-16tRNA-Arg(tct)[89821,89894]  
 gggggattagtttaactggaaaaactataggcttctatcctatcgagtag  
 gggttcgaatcccttatccccttc  
 1-17tRNA-Met(cat)[89904,89978]  
 ggccctgtagctcagttggttagagcagctcactcataatgagaaggtct  
 caggttcgagtcctgactaggccac  
 1-18tRNA-Tyr(gta)[90192,90276]  
 gggacggttgctcggctggaagaggcgcaggactgtaaattctgtaatcc  
 actaggaatggaggttcgagtcctcctcgtccac  
 1-19tRNA-Ser(gct)[90546,90633]  
 agaaaggtgtcagagtggtttattgagctagggtgctaacttagtggag  
 gaaataccttcgtgggttcgaatccatccttcttc  
 1-20tRNA-Asn(gtt)[90675,90747]  
 gacagggtagctcagtggttagagcaggagctgttaactctcaggtcgtg  
 ggttcgaatcccactctgtctc  
 1-21tRNA-Trp(cca)[90809,90882]  
 acttgagtagctcagttggttagagcagtggtctccaaaccaaaggtcgt  
 aggttcgagtcctacctctcgtgc  
 1-22tRNA-Phe(gaa)[90964,91038]  
 ggggttgtagctgagttggtacaagcgtccgattgaagctcgaagtagc  
 aagggtcgaagccttccttccac  
 1-23tRNA-Ile(gat)[142711,142786]  
 aatcgggtagttcaattggtagaacatcacactgataatgtgaagttgt  
 gggttcgagtcctccatcccgattacca

>KC821612.1 Cellulophaga phage phi40:1, complete genome

1-2tRNA-Glu(ttc)[28604,28676]  
gctcttttcgtctagcggtaaggacattcggttttcatccgaaaaacata  
ggttcgaatcctatagaggtac

1-3tRNA-Glu(ttc)[30574,30646]  
gctcttttcgtctagcggtaaggacattcggttttcatccgaaaaacata  
ggttcgaatcctatagaggtac

1-4tRNA-Lys(ttt)[35520,35593]  
gcccttgtagcaaacaggtttaggcaaccgtctttaaacggtggggct  
aggttcgattcctagcaggggcac

1-5tRNA-Ile(gat)[35642,35715]  
tggagtatagctcagcggtagagcactcccctgatacgggagatgtcgt  
aggttcgaaaccttctactccaac

1-6tRNA-Gly(tcc)[35803,35876]  
gcgtaagaggccatagtggaatggcgctgcctccaagtaggagatagc  
gagttcgaacctcgtcttacgctc

1-7tRNA-Met(cat)[35886,35955]  
tgtgggtggctcgtggtagaccagagggcctcataagtccttatagatgggt  
tcgactcccataccgccac

1-8tRNA-Asp(gtc)[36030,36107]  
ggtctaataagcgtgttggaacacgaattgcactgtcactgctctaaa  
acgaggggttcgaatccctcttagaccgc

1-9tRNA-Thr(tgt)[36117,36191]  
gcactaatgactgaataggaaatggacttcatttgaacgaagataatt  
cgggttcgactcctgattagtgtc

1-10tRNA-Val(tac)[36400,36474]  
accagattagctcagcggtttagagcagctctttacaaggagaaggtcg  
atagttcgaatctatcatttggtac

1-11tRNA-Arg(tct)[36535,36606]  
acctctatagtttaaaggaagaatacggcgcttctaacgctatggtcggg  
gttcgaatccctgtagaggttc

1-12tRNA-Ser(tga)[37017,37107]  
ggaagagtaagccaagtaggtctactggcgtgtcttgaaaacagttgg  
ggtttaaaagcccgtgtgggttcgagccccacttcttccgc

1-13tRNA-Ser(gct)[37112,37197]  
agagaggtgtctgagtggttaagggtactactttgctaaagtagtgggt  
taacgcctccgaggttcgaatcccttcttctac

1-14tRNA-Asn(gtt)[37206,37278]  
ggctaggtagctcagaggaagagcaggcgctgttaagcgtcaggtcgag  
atatcgaattctccctagcctc

1-15tRNA-Phe(gaa)[37437,37510]  
gcgttagaagctaacttggtagaagcactggcttgaaatcccagaggagt  
aggttcgattcctacatcgac

1-16tRNA-Pro(tgg)[38137,38209]  
cgagtagtgacaaaattggcacgtgccgacctggacgtcggagaatgca

ggttcgatccctgcctactcgac  
 1-17tRNA-Glu(ttc)[38218,38293]  
 gctatcgtcttctaaatggaataggaatccacccttcaaggtgtgcaat  
 gcgagttcaagtcctcgatagtac  
 1-18tRNA-Gln(ttg)[38339,38411]  
 tggagtatgatgaacggtagcatgactggtttgagccagttcgtcgg  
 ggttcgaatccctgtactccatc  
 1-19tRNA-His(gtg)[38422,38498]  
 cctccgttgcgccaattggaaaggcggtaagctgtgaacttgattaca  
 tgggttcgattccatacggttgtcca  
 1-20tRNA-Leu(taa)[38627,38710]  
 gcatccatggtggaaggctatacactacaggctaaaacctgtcgccg  
 aaaggattgggggttcgaatccctctggatgcac  
 1-21tRNA-Arg(acg)[38717,38789]  
 acttctatagcttaacggaaaagcgtccgctacgaacggatagattggg  
 ggttcgaatccctctagaagttc  
 >KJ803031.1 Dinoroseobacter phage vBDshPR2C, complete genome  
 1-1tRNA-Ile(gat)[14807,14882]  
 tgggtgtagctcagttgtagagcgaacgaccgataatcgttatgtcgc  
 tggttcgagtccaaccaccacaacca  
 1-2tRNA-Pro(tgg)[14886,14962]  
 cggaatgtaggctagtctgtaagtcgctcggttgggtccgagagatcg  
 taggttcgaatccctgccattccgacca  
 >KP869108.1 Escherichia coli O157 typing phage 10, complete genome  
 1-1tRNA-Arg(tct)[30924,31000]  
 gtggcattagctcagttggacagagcaaccgccttctaagcggttggtcg  
 caggttcgaatcctgcattccacgcca  
 >KU197013.1 Xanthomonas phage XAJ24, complete genome  
 1-1tRNA-Trp(cca)[962,1036]  
 gtctcggtagtgtaatggcaacataccggcctccaaagccgtgagattag  
 ggttcgagtcctaccgattcgcca  
 >KU687351.1 Citrobacter phage SH5, complete genome  
 1-1tRNA-Ser(tga)[11049,11127]  
 gtctccatagctcaaacggtagagcggcgggtcgatgacctattgcga  
 ttagggttcgaatccccgtggagacgcca  
 >KY065148.1 Vibrio phage JSF3, complete genome  
 1-1tRNA-Arg(tct)c[54903,54979]  
 gtctgttagctcaattggatagagcaagatgtttctaccgtctaggtta  
 taggttcgaatcctatacgggatgcca  
 >KY626177.1 Marinomonas phage CPG1g, complete genome  
 1-1tRNA-Arg(cct)[15657,15732]  
 ctcatattagctcagtaggatatagcgcgattgcctcctaagcaataggta  
 actggttcgagtcagttactgaga  
 >KY626176.1 Marinomonas phage CPP1m, complete genome

1-tRNA-Arg(cct)[15658,15733]  
 ctcaagtattagctcagtaggatagagcgattgcctcctaagcaatagta  
 actggttcgagtcagctatactgaga  
 >KY962008.1 Escherichia phage ST31, complete genome  
 1-tRNA-Thr(cgt)[10055,10133]  
 gtctccatagctcaaacggtagagcggcggtcgtgatggcctattgcga  
 ttagggttcgaatccccgtggagacgcca  
 >MF481197.1 Marinomonas phage CB5A, complete genome  
 1-tRNA-Arg(cct)[16734,16809]  
 ctcaagtattagctcagcaggatagagcgattgcctcctaagcaatagtc  
 actggttcgagtcagctatactgaga  
 >HF569089.1 Brucella phage Fi complete sequence  
 1-tRNA-Leu(cag)c[8178,8253]  
 gcgagcaggaggctcaggacggtcacggaactcagactccgttcggtct  
 gctgacctaactgctcgttcg  
 >JN254801.1 Pseudomonas phage MR299-2, complete genome  
 1-tRNA-Asn(gtt)[1605,1680]  
 tgggatgtagctcagttggttagagcagatagctgtaactatccggtcgt  
 aggttcgagccctaccatcccagcca  
 1-2tRNA-Asp(gtc)[1685,1760]  
 ggcccattaactcagcggtaagagtgtcccctgtctaggagaagtctg  
 gggttcgaatcccaatgggtcgcca  
 1-3tRNA-Pro(tgg)[1765,1840]  
 ctctcgtagctcagctcgttagagtcctgccttgaagcaggaggtc  
 gtaggttcgaatcctaccggggtgac  
 >KF005320.1 Alteromonas phage vB\_AmaP\_AD45-P2, complete genome  
 1-tRNA-Met(cat)[53590,53665]  
 gccctatagctcagcgtgtagagcagacgactcataatcgtaggtcac  
 tggttcaaatccggttaggggcacca  
 >KC556894.1 Brucella phage Fz, complete genome  
 1-tRNA-Leu(cag)c[10121,10196]  
 gcgagcaggaggctcaggacggtcacggaactcagactccgttcggtct  
 gctgacctaactgctcgttcg  
 >KT962245.1 Cellulophaga phage phi4:1\_13, complete genome  
 1-tRNA-Pro(tgg)[87196,87272]  
 cgggtaatagaggagtctggtttatctcgtgcatttgggatgcagagca  
 cgcaggttcgaatcctgcttatccgac  
 1-2tRNA-Glu(ttc)[87352,87424]  
 gctgccatgtctaacggctaggacctcaggtttcatcctggtaatcgg  
 agttcgattctccgtggcagtac  
 1-3tRNA-Gln(ttg)[87495,87568]  
 tggaatatggtgtaattggtaacacgtctggttttggccagaagagtgg  
 gggttcgagaccctctattccaac  
 1-4tRNA-His(gtg)[87570,87644]

gtgttagaagctaaagtggcgaagcgtctggttggtccagaagatag  
tgagttcgagtcctttaaaccaccc  
1-5tRNA-Leu(tag)[87703,87778]  
gcagaggtgggtaaaactggtaaacgcgccgatttaggatcgggagttct  
gagggttcgactccctctctctgtac  
1-6tRNA-Leu(taa)[87785,87866]  
gccccaatggtgaaactggtatacacgtagcacttaaaatgctatgctt  
aggcttcgaggttcgatccctgcttgggtac  
1-7tRNA-Arg(acg)[87871,87944]  
tttctcatagtttaactggaaaaacacaggttacggccttgagagtag  
gggttcgagtccttgagaaaac  
1-8tRNA-Ala(tgc)[88170,88243]  
ggcccagtagctaaactggcttagcacctccttgaaggagaagtatgt  
gggttcgagccccatctggccac  
1-9tRNA-Lys(ttt)[88325,88397]  
accctcgtagcttaatggcaaagctcctctctttaaaggcgaccgca  
agatcggtactgtcgggggtac  
1-10tRNA-Ile(gat)[88687,88761]  
aggaatatagctcagttggttagagtacttcgctgataccgaagatgca  
caagttcgaatctgttattctac  
1-11tRNA-Gly(tcc)[88865,88939]  
gcagcaatcgcatacggcctattgcacctgactccaatcaggatctcg  
tgagttcgaatctcacttctgcac  
1-12tRNA-Met(cat)[88944,89018]  
agcgaggtagagcagctggttagctcgctaggctcataacctagaggtcg  
ggagttcgagtcctcccttcgccac  
1-13tRNA-Asp(gtc)[89097,89170]  
agtctatcgggtccagtgagtgagcgtgccctgtcacggcagagatcac  
gggttcgagtccttatagactgc  
1-14tRNA-Thr(tgt)[89249,89323]  
tcctacgtagctcaattggtggagcactggtttgtaaaccaaaggttg  
tcggttcgagtcgacctaggatc  
1-15tRNA-Val(tac)[89470,89544]  
accagattagctcaggggttagagcaactctttacaaggagaaggtcg  
atagttcgaatctatcattgttac  
1-16tRNA-Arg(tct)[89555,89628]  
gggggattagtttaactggaaaaactataggcttctatcctatcgagtag  
gggttcgaatcccttatcccttc  
1-17tRNA-Met(cat)[89638,89712]  
ggcctttagctcagttggttagagcagctcactcataatgagaaggtct  
caggttcgagtcctgactaggccac  
1-19tRNA-Tyr(gta)[89926,90010]  
gggacggttgctcggctggaagaggcgaggactgtaaatctgtaatcc  
actaggaatggaggttcgagtcctcctcgccac

1-20tRNA-Ser(gct)[90280,90367]  
agaaaggtgtcagagtggttattgagctaggttgctaacttagtggagt  
gaaataccttccgtgggttcgaatcccatcctttcttc  
1-21tRNA-Asn(gtt)[90397,90485]  
tcttgagttgccgtagttggccgaacggtccagactgttaatctggtgag  
atttatctccatcgtaggttcgaatcctacctaagagc  
1-22tRNA-Trp(cca)[90629,90702]  
acttgagtagctcagttggtagagcagtggtctccaaaaccaaagtcgt  
aggttcgagtcctacctctcgtgc  
1-23tRNA-Phe(gaa)[90724,90798]  
ggggttgtagctgagttggtacaagcgtccgattgaagctcggaaagtacg  
aagggtcgaagccttcttccccac  
1-24tRNA-Ile(gat)[143233,143308]  
aatcgggtagttcaattggtagaacatcacactgataatgtgaagttgt  
gggttcgagtcctccatcccattacca

>KT962246.1 Cellulophaga phage phi4:1\_18, complete genome

1-1tRNA-Pro(tgg)[87196,87272]  
cgggtaatagaggagctcgtttatctcgtgcatttgggatgcagagca  
cgcaggttcgaatcctgcttatccgac  
1-2tRNA-Glu(ttc)[87352,87424]  
gctgccatcgtctaacggctaggacctcaggtttcatcctgtaacgg  
agttcgattctcgtggcagtac  
1-3tRNA-Gln(ttg)[87495,87568]  
tggaatatggtgtaattggtaacacgtctggttttggccagaagagtgg  
gggttcgagaccctctattccaac  
1-4tRNA-His(gtg)[87570,87644]  
gtgttagaagctaaagtggcgaagcgtctggttggtccagaagatag  
tgagttcgagtcctttaacaccc  
1-5tRNA-Leu(tag)[87703,87778]  
gcagaggtgggtaaaactggtaaacgcccccatttaggatcgggagttct  
gagggttcgactccctctctgtac  
1-6tRNA-Leu(taa)[87785,87866]  
gccccaatggtgaaactggtatatacagtagcacttaaatgctatgctt  
aggcttcaggttcgatccctgcttgggtac  
1-7tRNA-Arg(acg)[87871,87944]  
tttctcatagttaactggaaaaacacagagttacggcctttgagagtag  
gggttcgagtcctttgagaaaac  
1-8tRNA-Ala(tgc)[88170,88243]  
ggcccagtagctaaactggcttagcacctccttgaaggagaagtatgt  
gggttcgagccccatctggcccac  
1-9tRNA-Lys(ttt)[88325,88397]  
accctcgtagcttaattggcaaagctcctctcttttaagaggcgaccgca  
agatcggtactgtcgggggtac  
1-10tRNA-Ile(gat)[88687,88761]



aggaatatagctcagttggtagagtacttcgctgataccgaagatgtca  
caagttcgaatcttggtattcctac  
1-11tRNA-Gly(tcc)[88865,88939]  
gcagcaatcgcatacgccctattgcacctgacttccaatcaggatctcg  
tgagttcgaatctcacttgctgcac  
1-12tRNA-Met(cat)[88944,89018]  
agcgaggtagagcagctggtagctcgctaggctcataacctagaggtcg  
ggagttcgaagtcccccttcgccac  
1-13tRNA-Asp(gtc)[89097,89170]  
agtctatcggtccagtgagtgagcgtgccctgtcacggcagagatcac  
gggttcgagtcctgtagactgc  
1-14tRNA-Thr(tgt)[89249,89323]  
tccctacgtagctcaattggtagcactggtttgtaaaccaaaggtg  
tcggttcgagtcggacctagggatc  
1-15tRNA-Val(tac)[89470,89544]  
accagattagctcaggggttagagcaactctttacaaggagaaggtcg  
atagttcgaatctatcatttggtac  
1-16tRNA-Arg(tct)[89555,89628]  
ggggattagtttaactggaaaaactataggcttctatcctatcgagtag  
gggttcgaatcccttatcccccttc  
1-17tRNA-Met(cat)[89638,89712]  
ggcctttagctcagttggtagagcagctcactcataatgagaaggtct  
caggttcgagtcctgactaggccac  
1-19tRNA-Tyr(gta)[89926,90010]  
gggacggttgctcggtggaagaggcgcaggactgtaaattctgtaatcc  
actaggaatggaggttcgagtcctcctcgtccac  
1-20tRNA-Ser(gct)[90280,90367]  
agaaaggtgtcagagtggttattgagctaggtgctaacttagtggagt  
gaaataccttcgtgggttcgaatccatccttcttc  
1-21tRNA-Asn(gtt)[90397,90485]  
tcttgagttgccgtagttggccgaacggtccagactgtaatctggtgag  
atttatcctcatcgtaggttcgaatcctacctaagagc  
1-22tRNA-Trp(cca)[90629,90702]  
acttgagtagctcagttggtagagcagtggtctccaaaaccaaaggtcgt  
aggttcgagtcctacctctcgtgc  
1-23tRNA-Phe(gaa)[90724,90798]  
ggggtttagctgagttggtacaagcgtccgattgaagctcggaagtacg  
aagggtcgaagccttcttcccccac  
1-24tRNA-Ile(gat)[143233,143308]  
aatcggttagttcaattggtagaacatcacactgataatgtgaagttgt  
gggttcgagtcctccatcccattacca

>KU927496.1 Salmonella phage 101962B\_sal5, complete genome

1-tRNA-Asn(gtt)[20194,20268]  
gggtcagtcgtataaaggtcattacggaaggctgtaaccttctatcgt

```

ggttcgagtcacgctgtccagcca
1-2tRNA-Thr(tgt)[20274,20349]
gctggttagctccaatggtagagcagtcgcctgtaagcgaatgggtag
cggttcaagtcggttaaccagcacca
>KU927491.1 Salmonella phage 146851_sal5, complete genome
1-1tRNA-Asn(gtt)[20960,21034]
gggtcagtcgtataaaggtcattacggaaggctgtaaccttcttatcgt
ggttcgagtcacgctgtccagcca
1-2tRNA-Thr(tgt)[21040,21115]
gctggttagctccaatggtagagcagtcgcctgtaagcgaatgggtag
cggttcaagtcggttaaccagcacca
>KU927492.1 Salmonella phage 146851_sal4, complete genome
1-1tRNA-Asn(gtt)[39490,39564]
gggtcagtcgtataaaggtcattacggaaggctgtaaccttcttatcgt
ggttcgagtcacgctgtccagcca
1-2tRNA-Thr(tgt)[39570,39645]
gctggttagctccaatggtagagcagtcgcctgtaagcgaatgggtag
cggttcaagtcggttaaccagcacca
>KU927498.1 Salmonella phage 64795_sal4, complete genome
1-1tRNA-Asn(gtt)[39480,39554]
gggtcagtcgtataaaggtcattacggaaggctgtaaccttcttatcgt
ggttcgagtcacgctgtccagcca
1-2tRNA-Thr(tgt)[39560,39635]
gctggttagctccaatggtagagcagtcgcctgtaagcgaatgggtag
cggttcaagtcggttaaccagcacca
>KU927495.1 Salmonella phage 103203_sal4, complete genome
1-1tRNA-Asn(gtt)[20457,20531]
gggtcagtcgtataaaggtcattacggaaggctgtaaccttcttatcgt
ggttcgagtcacgctgtccagcca
1-2tRNA-Thr(tgt)[20537,20612]
gctggttagctccaatggtagagcagtcgcctgtaagcgaatgggtag
cggttcaagtcggttaaccagcacca
>KX098390.2 Erwinia phage vB_EamP_Rexella, complete genome
1-1tRNA-Asn(gtt)[41219,41294]
gacgggttagctcagttggtagagcgattgactgttaatcaattgggtcat
cggttcaaatccggtactcgtcgcca
1-2tRNA-Glu(ttc)[41301,41377]
attcctgtagacaaattggtaaagtcaccaccctttcaagggtgtatttg
tgggttcaagtcctcaggaatgcca
1-3tRNA-Asp(gtc)[41384,41458]
agtgcctatagttcagcggtagaatacctccctgtcacggagatggtcacg
ggttcgaatccggttagcactgcca
1-4tRNA-Ile(gat)[41462,41537]
tgcttcatagctcagttgggtagagcaaccgcccataagcggtaggtcac

```

tggttcaagtcagttgaagcaacca  
1-5tRNA-Tyr(gta)[41796,41877]  
gggggattagtcaagcggcgaagacggcagactgtaaactgttatccc  
acacggtagttcgaatctacatccccacca  
1-6tRNA-Ser(gct)[41883,41974]  
ggaagattggctgagtggtctaaaagcgtccggtgctaaccggaaggcgg  
tgtaacagcttcccactggttcgaatccagtatcttctcca  
1-7tRNA-Lys(ttt)[41980,42056]  
aggtcgtagctcagttggttagagcaccggacttttaaccggatgtca  
ttggttcgaggccaatacgaacctacca

>KX098391.1 Erwinia phage vB\_EamP\_Gutmeister, complete genome

1-1tRNA-Asn(gtt)[36891,36966]  
gacgggttagctcagttggttagcgcgattgactgttaataattggtcat  
cggttcaaatccgtactcgtcgcca  
1-2tRNA-Glu(ttc)[36973,37049]  
attcccgtagacaaattggtacagtcaccacacttcactgtggagtttg  
tgggttcaagtcacctcggaatgcca  
1-3tRNA-Asp(gtc)[37056,37131]  
agtcctatagttcagtcggtagaataacctccctgtcacggagaaggtcac  
gggttcgagtcggttaggactgcca  
1-4tRNA-Ile(gat)[37135,37210]  
tgcttcagctcagtggttagagcaaccgcccataagcggtaggtcac  
tggttcaagtcagttgaagcaacca  
1-5tRNA-Tyr(gta)[37469,37550]  
gggggattagtcaagcggcgaagacggcagactgtaaactgttatccc  
acacggtagttcgaatctatcatccccacca  
1-6tRNA-Pro(tgg)[37555,37631]  
cggcatttagctcagtttggcagagcatcggcttgggagtcgagggtcg  
aaggttcaaatccttcagtcggacca  
1-7tRNA-Ser(gct)[37637,37728]  
ggaagattggctgagtggtctaaaggcgtccggtgctaaccggaaggcgg  
tgtaacagcttcccactggttcgaatccagtatcttctcca  
1-8tRNA-Lys(ttt)[37734,37810]  
aggtcgtagctcagttggttagagcaccggacttttaaccggatgtca  
ttggttcgaggccaatacgaacctacca

\*Polydnaviridae

>AJ632313.1, AJ632317.1, AJ632321.1, AJ632305.1, AJ632310.1 Cotesia congregata virus complete genome

2-1tRNA-Thr(cgt)c[8914,8986]  
gtcttagatagcttaactggaagagctcttggtgcgtaaccaaaagatcc  
aggttcgattcccggccggggct  
6-1tRNA-Thr(tgt)c[9967,10041]  
agaccgtagctcaaatggtagtagccgacatgtcttcggaaggttc  
tgggttcgaatcccagtcgagcta

6–2tRNA–Thr(tgt)[23439,23513]  
agaccgtagctcaaatggtagagtagccgacatgtcttcggaagggttc  
tgggttcgtatcccagtcaggagcta  
10–1tRNA–Thr(cgt)[5364,5436]  
atctcgtagcttaactggtagagccttggcgcgtaaccaaagggtcc  
gggttcgagtcgggtctggatt  
11–1tRNA–Thr(tgt)[914,988]  
agaccgtagctcaaatggtagagtagccgacatgtcttcggaagggttc  
tgggttcgaatcccagtcaggagcta  
28–1tRNA–Thr(tgt)[9868,9942]  
agaccgtagctcaaatggtagagtagccgacatgtcttcggaagggttc  
tgggttcgaatcccagtcaggagcta  
28–2tRNA–Thr(tgt)[10188,10260]  
gaccgtagctcaaatggtagagtagccgacatgtcttcggaagattct  
gggttcgaatcccagtcaggagca  
28–3tRNA–Thr(tgt)[14305,14379]  
agaccgtagctcaaatggtagagtagccgacatgtcttcggaagggttc  
tgggttcgaatcccagtcaggagcta

>DQ000240.1 Microplitis demolitor bracovirus segment O, complete sequence

15–1tRNA–Ser(cga)[1653,1724]  
gccgtagctcaactggtagagcactcggcgcgataccgacatggtctg  
ggttcgattcccagttcgggct  
15–2tRNA–Ser(cga)[1875,1946]  
gccgtagctcaactggtagagcactcggcgcgataccgacatggtctg  
ggttcgattcccagttcgggct  
15–3tRNA–Ser(cga)[8881,8952]  
gccgtagctcaactggtagagcactcggcgcgataccgacatggtctg  
ggttcgattcccagttcgggct  
15–4tRNA–Ser(cga)[9104,9175]  
gccgtagctcaactggtagagcactcggcgcgataccgacatggtctg  
ggttcgattcccagttcgggct  
15–5tRNA–Ser(cga)[9326,9397]  
gccgtagctcaactggtagagcactcggcgcgataccgacatggtctg  
ggttcgattcccagttcgggct  
15–6tRNA–Ser(cga)[24254,24325]  
gccgtagctcaactggtagagcactcggcgcgataccgacatggtctg  
ggttcgattcccagttcgggct  
15–7tRNA–Ser(cga)[24477,24548]  
gccgtagctcaactggtagagcactcggcgcgataccgacatggtctg  
ggttcgattcccagttcgggct

\*Polyomaviridae

>KP033140.2 Adelie penguin polyomavirus isolate AdPyV\_Crozier\_2012, complete genome

1–1tRNA–Phe(gaa)[2769,2841]  
gctgaagtagctcagttgggagagcattagactgaagatctaaaggtccc

tggttcaaccccggttcagca

\*Poxviridae

>KM502564.1 Parapoxvirus red deer/HL953 strain HL953, complete genome

1-tRNA-Pyl(cta)c[122496,122582]

cgctgctgtcggcgtatgcccggtgcagagctcctctaggggctctcg

aaatcgctgtcgtgttcgagtcgctgtggtggtggc

>MF503315.1 UNVERIFIED: Squirrelpox virus Berlin\_2015, complete genome

1-tRNA-Asp(gtc)[25493,25578]

attcaacatagatataataactcgtttgtccaacacataaagagttcgt

tgatttgatttctcgttcgatacgaataattggata

\*Retroviridae

>AF033812.1 Abelson murine leukemia virus, complete genome

1-tRNA-Gly(ccc)c[1169,1260]

cctgcgaggtagtaggagtcggccactgggggctcccgtctccacgcagg

cgagatgccattggggaggggtccggtgcctctccgcaggg

>AF033813.1 Moloney murine sarcoma virus, complete genome

1-tRNA-Gly(ccc)c[1105,1196]

cctgcgaggtagtaggagtcggccacaggggctcccgtctccacgcagg

cgagatgccattggggaggggtccggtgcctctccgcaggg

>AF033811.1 Moloney murine leukemia virus, complete genome

1-tRNA-Gly(ccc)c[905,996]

cctgcgaggtagtaggagtcggccacaggggctcccgtctccacgtagg

cgagatgccattggggaggggtccggtgcctctccgcaggg

\*Siphoviridae

>AF011378.1 Bacteriophage sk1 complete genome

1-tRNA-Trp(cca)[27504,27576]

tgcgagcatagataatggtaatgtacagattccaaacctgtaaacgtg

ggttcgattcctactgttcgtgt

>AF304433.1 Bacteriophage TP901-1, complete sequence

1-tRNA-Lys(ttt)[13134,13208]

gtggctgcatggtcaaggggtaagacactgcacttttaatgcagaggcg

tgattcgaatctcactcagtcaca

1-2tRNA-Ala(cgc)[13288,13375]

tagcaagtatatggctaaggttcgttagtaagtcgcaccttacgactta

gtatggaattgttagggttcgactccctgacttgctat

>AF009630.1 Bacteriophage bIL170, complete genome

1-tRNA-Pro(tgg)[31308,31379]

caggatatggtgtcaatggttagcatagctgtttgggaacatgtggtgtt

ggttcgagtcagctatcctga

>AF323672.1 Bacteriophage bIL311, complete genome

1-tRNA-Leu(taa)[13135,13220]

tgctcgaatggcggaattggcagacgtgcggacttaaaatccgttggtt

attaaacctgagggttcaagtcctctttgagcat

>AY129331.1 Mycobacteriophage CJW1, complete genome

1-tRNA-Arg(cct)[63846,63929]  
atggcccgtagctcagtcaggtagagcagccttggcccttgcgggcttgg  
ttcgtccccggttcaaatccgggcgggccttgcc

1-2tRNA-Gly(tcc)[63932,64004]  
gcgcccgtggcgaattggaaagactcctggcttccaccaggttatgca  
ggttcgagtcctgtcgggcgctc

>AY129333.1 Mycobacterium phage Che9c, complete sequence  
1-tRNA-Tyr(gta)[32232,32310]  
aacacgttagaacgtattccacggactgtaaatccgtcggcttacgcct  
acgcaggttcgaatcctgcacctgccacc

>AY129332.1 Mycobacterium virus Bxz2, complete genome  
1-tRNA-Asn(gtt)[3932,4007]  
tgatctgtagctcaatcggcagagcaccggctgtaaccgggacgttgg  
aggttcgagtcctccagatcagcca  
1-2tRNA-Trp(cca)[4048,4122]  
aggcacgtagctcaattggtcagagcagcggctcctcaagccgcccgtg  
caggttcgagtcctgccgtgtctgc  
1-3tRNA-Leu(cag)[4157,4231]  
ggctcgtaggcaaacaggcaaagccgctgtctcaggaacaggtgcgtg  
agggttcgactccctcccagctac

>X98106.1 Lactobacillus bacteriophage phig1e complete genomic DNA  
1-tRNA-Gly(tcc)[2594,2664]  
gcgagtgtagttagtggtaaaacgatagccttccaagctgtagtcggg  
gtccgattcccgtcactcact  
1-2tRNA-Ile(tat)c[31567,31641]  
tattcccgtagctcagtggcagagcgtccaattataattgggaggtcgc  
tggttcgatgccagccgggaataac  
1-3tRNA-Tyr(gta)c[31887,31969]  
ggcggcgctcagagatggagagctgtgtcggctgtaaaaccgatccc  
ttgggtgagtaggtttgattcctaccgcccca

>AF022214.1 Mycobacterium virus D29, complete genome  
1-tRNA-Asn(gtt)[4218,4292]  
tgacgtgtagctcaatggcagagcatccggctgtaaccggacggtgaa  
ggttcgagtccttctcgtcagcca  
1-2tRNA-Trp(cca)[4333,4408]  
gtacacgtagctcaattggtagagcagcggctcctcaagccgcccgttcc  
aggttcgactcctggcgtgtatgcca  
1-3tRNA-Gln(ctg)[4416,4488]  
tccccgttcgtctaatacggtaaagacgctggctctggaccaggttaattga  
ggttcgagtccttggcggggagc  
1-4tRNA-Glu(ctc)[4523,4596]  
ggtcccttggagtagcggataactcacctggccctcaccagaagatcgc  
gggttcgaatcccgcaggactac  
1-5tRNA-Tyr(gta)[4600,4680]

cgcgagatacccaagcggcaacgggatctgactgtaaatcagacgcttcg  
 gcttcgcaggttcgagtcctgctctcgcgac  
 >AY129338.1 Mycobacteriophage Omega, complete sequence  
 1-tRNA-Gly(tcc)[95561,95633]  
 gcgcttgggtcgaattggaagactcctggctccaccaggttatgca  
 gggttcgagtcctgtcgcgctc  
 1-2tRNA-Tyr(gta)[96528,96601]  
 tggcccgtagctcaattggcagagcagccggcggttaattcggcgcgtct  
 cgggttcgagtcgggcgggctacc  
 >AY576796.1 Actinoplanes phage phiAsp2, complete genome  
 1-tRNA-Asn(gtt)[27417,27506]  
 gacctcgtagtcagttgggtgtatgaccggcggttgttggcccca  
 tcgcccgccgatgatctggatcttccggacggcggcgc  
 1-2tRNA-Ala(ggc)[34296,34375]  
 gacgccaccagtttgggaggcgtgccggttggcgccggcgctggctc  
 cggcctcggggtcgaacccggcggcctcg  
 1-3tRNA-Trp(cca)[36786,36858]  
 gggcgctccgggtgaggacggcctgggcgcgctccaggcgccaggttg  
 ccgatcaggcgacgaacgccc  
 >AJ550940.2 Bacteriophage phi-BT1 complete genome  
 1-tRNA-Thr(cgt)[31992,32066]  
 gctccgtagctcagcgggaagagcgccccgacgttcgagggggaagccg  
 ccgggtcgaatccggcccggagcac  
 1-2tRNA-Lys(ctt)[40986,41059]  
 gttccgtagctcaatgggcagagcaccggctcttaaccgggtgtgtg  
 tgggttcgagtcagccgggaacac  
 >AF165214.2 Bacteriophage D3, complete genome  
 1-tRNA-Met(cat)[53398,53473]  
 cgcagggtggagaagtggatcatctcgccggcccataacccggagatcgc  
 tgggtcgaatccagcccttgctacca  
 1-2tRNA-Gly(tcc)[53980,54055]  
 gcggcttagctcaactggcagagcgtgtcctccaagtcagatgttgc  
 aggttcaagtcccgagcgcgtcca  
 1-3tRNA-Asn(gtt)[54068,54142]  
 tgacgttagctcagaggtatagcggctggttaccgactggtcgat  
 ggttcgatcccatccggtcagcca  
 1-4tRNA-Thr(tgt)[54147,54222]  
 gccggtatggcgcaacaggagcgtgctgattgtaatcagaggggtgc  
 ggggtcgactcctgctccggcacca  
 >Z18946.1 Mycobacterium phage L5 complete genome  
 1-tRNA-Asn(gtt)[4200,4272]  
 tgacgttagctcaatggcagagcggcgactgttaatcgggtggtgaa  
 ggttcgagtccttccatgtcagc  
 1-2tRNA-Trp(cca)[4350,4423]

gtacacgtagctcaattggtagagcagcggtctccaaagccgccggtcc  
agggtcgactcctggcgtgatgc  
1-3tRNA-Gln(ctg)[4479,4553]  
tccccgttcgtctaatacggttaagacacccggctctggaccgggcaattga  
ggttcgagtccttggcggggagcca

>AJ251789.2 Lactobacillus casei bacteriophage A2 complete genome

1-1tRNA-Leu(taa)[38396,38466]  
gcaaccgtagctcagatgggagagcagtggcataagcctatcggtcgtgg  
gttcgagccccaccggttcg

>AJ006589.3 Bacteriophage phi-C31 complete genome

1-1tRNA-Gly(ccc)[31424,31511]  
gctccgtagctcagcgggaagagcggccgaacccgggacgcgaaagcgtg  
cacgcggaagccgccggttcgaatccggcccgagcac  
1-2tRNA-Thr(cgt)[40702,40777]  
gcctccctagctcagttcggttagagcgctgttcgtaatcagggggtc  
ggcgggttcgaatccgtcggggggctc

>AY543070.1 Bacteriophage T5, complete genome

1-1tRNA-Met(cat)c[28038,28113]  
agttagtggcagagtgggtatgcacctcttcatacggagcgactacag  
tggttcaaatccactactaactacca  
1-2tRNA-Ile(gat)c[28210,28286]  
acttcggtagcttagcgatctaaagcactcggctgataaccgagagatcg  
ggggtttaaatccctcccggagtacca  
1-3tRNA-Thr(tgt)c[28667,28741]  
gctcctaaagcattgttggtgatgcagttgccttgaagcatctgaaccg  
ggttcgattcctagtgggagcacca  
1-4tRNA-Gln(ttg)c[29260,29337]  
tggggattagcttagcttggcctaaagcttcggccttgaagtcgagatc  
attggttcaaatccaatatcccctgccca  
1-5tRNA-Gln(ctg)c[29344,29419]  
agaaggttagccaagtcggttaaggctgggatctctgaaaccactgatcg  
tggttcgaaccactaccttctgccca  
1-6tRNA-His(gtg)c[30206,30282]  
tggtctatatcataattggttaatgatcctgattgtgaatcaggcctatg  
tggattcgaattccactagccacccca  
1-7tRNA-Ser(tga)c[30845,30934]  
ggaaggtagggcgtagtgttacgcaactagctctgaaaactagcccgtg  
tagtgatacgggtgatggttcgactccattaccttctcca  
1-8tRNA-Ser(gga)c[30942,31035]  
ggaaaagcaaatagactggcgactaaacccgattggaaatcggttgagta  
atagcaatattgccttatgggtcaactcccacatctttccgccca  
1-9tRNA-Leu(tag)c[31624,31708]  
ggggctatgctggaactggtagacaatacggccttagattccgtagctta  
aatgcgtgggagttcgagttccctagccccacca



1-10tRNA-Ala(tgc)c[31714,31788]  
 gggcgaatagtgtagcgaggacacaccagactgcaatctggtagggag  
 ggttcgagtcctctttgtccacca  
 1-11tRNA-Val(tac)c[32081,32154]  
 gctcggtagtataatgggagaaccccgctttacacggcggttgata  
 gttcgattctatcaccgaglacca  
 1-12tRNA-Lys(ttt)c[32162,32239]  
 ggggtgctagctcaactggttagagcactggtctttaaacataggtt  
 acaggttcgagtcctgtcaaccacca  
 1-13tRNA-Met(cat)c[32428,32505]  
 tgcgggtagatctctgtagagatcgctagctcataagctagaagag  
 gtaggttcgattcctgcaccgctcca  
 1-14tRNA-Pro(tgg)c[32512,32588]  
 ctccgattagctcaattggctagagtacaccgttggggcggtggggtg  
 aaggttcgagtccttcattggagacca  
 1-15tRNA-Asp(gtc)c[33578,33654]  
 gcgaccggggctggcttgtaatggtactcccctgtcacgggagagaatg  
 tgggtcaaatcccatcggtcgcgcca  
 1-16tRNA-Asn(gtt)c[33952,34029]  
 ggttccttagctctaattggttagagcggcatctgttaagttgagggtt  
 gctggttcgaatccagcaggaaccgcca  
 1-17tRNA-Cys(gca)c[34546,34621]  
 cgaccgttggctgaatggcttaggcgaaggattgcaaatccttttatgt  
 gattcaaatctcatcggtcgtcca  
 1-18tRNA-Phe(gaa)c[35096,35170]  
 gcaccttagctgagatggattagcgttcctgaagagcttgagaggtt  
 cgttcaattcgaacagggtgcacca  
 1-19tRNA-Glu(ttc)c[35257,35333]  
 gtctgttagacaaactggtaaagtcactacccttcaaggtagggttg  
 cgggttcgatccccacacaggacgcca  
 1-20tRNA-Tyr(gta)c[35340,35427]  
 gggggagtattctgtaagtggtagcagagctgactgtaattagttgtca  
 ttgcgactcgggtggttcgactccatcctccctacca  
 1-21tRNA-Ser(gct)c[37170,37258]  
 ggaagaatagcataacggtattgcagcagattgctaactgtcggtttga  
 aatatagccttgggttcgattcccacttcttcgcca  
 1-22tRNA-Arg(tct)c[40773,40847]  
 cggggtgtagtctaaggagaggcaggagtcttctaattcctttatgca  
 ggttcgaatcctgtcacctcgcca  
 1-23tRNA-Ser(act)c[41431,41504]  
 tgccgacctagtataaacggtattatcaagccgtaactggtggaagatgt  
 aggttcgaatcctacggtcggttaa

>AY236756.1 *Lactobacillus plantarum* bacteriophage phiJL-1, complete genome

1-1tRNA-Ile(tat)[12,85]

tactcgtatagctcagtggttagagcactcaactataattgaggggtcga  
 ttgttcaagccaatctacgagtat

>AM156909.1 Bacteriophage RTP, complete genome  
 1-tRNA-Arg(tct)[4893,4969]  
 gccccgctagctcaattggatagagcaacgaccttctaagtcgtaggtta  
 ctggttcgaatccagtcgagcgcca

>DQ121662.1 Bacteriophage JK06, complete genome  
 1-tRNA-Arg(cct)c[22138,22213]  
 gtctcgtggcgtaacaggataacgcagagacctcctaagtcagttac  
 tggttcagtcagtcggaacacca

>AY131267.2 Bacteriophage Lc-Nu, complete genome  
 1-tRNA-Asp(atc)[32542,32614]  
 gtgagtagtgaagtgaaaaagctcccgctcatcaggcgggtaatcgct  
 gggttcgattccatctctcaca

>EF116926.2 Streptococcus phage SMP, complete genome  
 1-tRNA-Ser(gct)[24448,24535]  
 ggagagtactcaaggctgaagaggcgaggttgctaccttgctaggcc  
 gaatttcggcgcatgggttcgaatcccatactctcct

>DQ398052.2 Mycobacteriophage Wildcat, complete genome  
 1-tRNA-Trp(cca)[58812,58883]  
 gcgctgatagttagtggtaacacggcaagctccaaccttgctatctggg  
 gttcaagtcctcatcagcgtgc  
 1-3tRNA-Pro(tgg)[59496,59567]  
 cagggtgtggttagtggtcgcatggctgccttggaagcaggcggacgca  
 gttcaattctgcgcaccctgac  
 1-4tRNA-Phe(gaa)[59891,59965]  
 cggtcgttagtgaagatggagatcacgcgggcctgaaaaacccgagacgc  
 aggttcgattcctgcacgaccggcc  
 1-5tRNA-Met(cat)[59969,60045]  
 tgcggtgtagtggagttcggtaccatgcgaggtcataacctctgcgaca  
 cgggttcaatcccgtcgccgcgacca  
 1-6tRNA-Tyr(gta)[60157,60239]  
 gcgtcagacgcacattgggtagtcagcggctgtaaaaccgtcgcttc  
 gggcattgggggttcaagtcctcctgacgcac  
 1-7tRNA-Ala(tgc)[60312,60383]  
 gggggtatcgataatggtattacgcctgcctgcaagcaggtcattggg  
 gttcaattccccatacctccac  
 1-8tRNA-Val(tac)[60438,60509]  
 gcccgttagctcaatgggagagccaccggcctacacccggtagacgaga  
 gttcaattcttcagcgggtac  
 1-9tRNA-Leu(tag)[60579,60653]  
 ggctcgttatgcaaaccggcaaagcagcctgccttagaagcaggtgttc  
 agggttcgactccctggcgagctac  
 1-10tRNA-Leu(caa)[60711,60784]

ggtcgtgtaggcaaagcgcaaagccccaagctcaaacctgggtgtt  
gggttcaactcccaccgcgactac  
1-11tRNA-Gly(tcc)[60880,60953]  
gagggtgaagtgttaacggtatgcacggctgtctccaacagcaagagc  
gagttcgattctcgtcacccctcac  
1-12tRNA-Gly(gcc)[61029,61100]  
gtggacgtgatgtaatggtagcctccccgcttgccaagcagggtgtcgg  
gttcaattcccgtcgtccgcac  
1-13tRNA-Gln(ctg)[61288,61360]  
tgccctatggtgtaattgacagcacaggtggctctgaaccatctagtca  
ggtttgaatccttggggcagc  
1-14tRNA-Asp(gtc)[61578,61650]  
cccgcatagttagtggttaacacgccagctgtcacgctgtagcgag  
ggttcaattccctctggcggggc  
1-15tRNA-Thr(agt)[61657,61731]  
ggctttagctcaacggttttagagcagctgtctagtaaacagccgacc  
agggttcgactccctgcttagcctc  
1-16tRNA-Lys(ctt)[61803,61875]  
gggggcgtagtataacggcaattactgttggtctttacccttcagatggg  
agttcgacttccccgcctcac  
1-17tRNA-Cys(gca)[61882,61957]  
gccggtgtgacagaacgatttatgtggcagctgcaaaactgacctaaagc  
gggtttgactcccgccaccggtcca  
1-18tRNA-Ile(gat)[61960,62032]  
tggcccgtagttcaacggtagaacggatcgctgataacgatcagacaag  
agttcaactctctcgggccaac  
1-19tRNA-Arg(acg)[62139,62212]  
gcccgtgtagctcagtgtagagccgtggcctacgaagccatgggccgg  
gggttcgaatccctccacgggtac  
1-20tRNA-Ser(gct)[62237,62319]  
ggagagtgatgcaacaggggtggtgcactgcctgctaagcgatgtgtct  
gcaaggatcacgttcaactcgtgctctctccgc  
1-21tRNA-His(gtg)[62321,62394]  
gtgtctgtagctcaatggtagagcctcccgtgtgaccgggacgacgacg  
gtcagaaccgtccagacacccca  
1-22tRNA-Glu(ttc)[63026,63098]  
ggttccgtggtgtaacggtagcacctgggtcttcaagcccaaggtcag  
ggttcaactccctgcggaactgc  
1-23tRNA-Glu(ctc)[63103,63174]  
ggccactggtgtaatgggaacacgccacccctcaaggtggagtcaggg  
gttcaattcccctgtgggctac  
1-24tRNA-Asn(gtt)[63180,63251]  
tccggtatcgttcaaaggcaggacaccaagctgttaactggctatgttg  
gttcgatcccagctaccggagc

>DQ054536.1 Lactococcus phage P008, complete genome  
1-tRNA-Asp(gtc)[27791,27862]  
taggatatagccaaattggtatgtgtaggcagagtcgcaatctgttact  
ggttcgattccagttgtcctag  
1-2tRNA-Pro(tgg)[27919,27990]  
caggatatagtgtaatggtagcatgcgtgtttgggaacatgtagtgtt  
ggttcgagtcagctatcctga

>DQ227763.1 Lactococcus phage 712, complete genome  
1-tRNA-Trp(cca)[29387,29459]  
tacgagcatagtatagtggaatgctacagattccaaacctgtaaacgtg  
ggttcgattcctactgttcgtgt

>DQ398041.1 Mycobacteriophage 244, complete genome  
1-tRNA-Arg(cct)[61979,62062]  
atggcccgtagctcagtcaggtagagcagccttgcgcccttgcgggcttgg  
ttcgtccccggttcaaatccggcgggccttgcc  
1-2tRNA-Gly(tcc)[62065,62137]  
gcgcccgtggtcgaattggaaagactcctggctccaccaggttatgca  
ggttcgagtcctgtcgggcgctc

>DQ398043.1 Mycobacterium virus Che12, complete genome  
1-tRNA-Asn(gtt)[4024,4098]  
tgacgtgtagctcaacggcagagcaccggctgtaaccggacggttgaa  
ggttcgaatccttcacgtcagcca  
1-2tRNA-Gln(ctg)[4135,4207]  
tctccttctgtaaatcggaagacaccggctctggaccgggcaattga  
ggttcgagtccttgaggagagc  
1-3tRNA-Trp(cca)[4242,4315]  
gggtcagtagctcaatcggtagagcagcggctctcaaagccgcgcttgg  
aggttcgagtcctcctggccgc

>DQ227764.1 Lactococcus lactis phage jj50, complete genome  
1-tRNA-Trp(cca)[26497,26569]  
tcgagcatagtatagtggaatgctacagattccaaacctgtaaacgtg  
ggttcgattcctactgttcgtgt

>AM419438.1 Archaeal BJ1 virus complete genome  
1-tRNA-Phe(gaa)[19972,20048]  
tggatcagatagctcagtcaggagagcaccggcctgaagcgctggcgtgc  
ctcgggtcgaatccgagtcgatccatc

>CP000917.1 Enterobacteria phage EPS7, complete genome  
1-tRNA-Met(cat)c[29711,29786]  
agttagttggcagagaggttatgcacctcctcatcaggagcgactacag  
tggttcaaatccactactaactacca  
1-2tRNA-Ile(gat)c[29884,29960]  
gcttcggtagcttagcgatctaagcactcggctgataaccgagagatcg  
ggggtttaaaccctcccgagtacca  
1-3tRNA-Thr(tgt)c[30533,30607]

gctcctaaagcattgctggcgatgcagttgccttgaagcatctgaaccg  
ggttcgattcctggtgggagcacca  
1-4tRNA-Gly(tcc)c[31012,31086]  
gcgtgattagttcagtggttagaataactggctccaaccagtagacacg  
agttcgactctcgatcccccacca  
1-5tRNA-Gln(ttg)c[31093,31168]  
tggagagtagtgaacggtagcacaacggcctttgactccgtaatggt  
aggttcgattcctccttctccagcca  
1-6tRNA-Gln(ctg)c[31175,31250]  
tgggatgtagatcaattggcagatcgtcggcctctgactccgaaggttcc  
acgttcgatccgtggcatcccagcca  
1-7tRNA-Arg(acg)c[31484,31558]  
gcgtccttatttcaacggaagaatgtaaagctacgaactttacgatcgg  
ggttcgattccctgaggatgcacca  
1-8tRNA-His(gtg)c[31565,31641]  
gtggctatatcataattggttaatgatcctgattgtgaatcaggcctatg  
tgattcgaattccactagccacccca  
1-9tRNA-Ser(tga)c[32183,32272]  
ggaaggtaggacatagtggtatgaacaggcttgaaaacctgcccgtg  
tagcgatatggtgatggttcgactccattaccttctcca  
1-10tRNA-Leu(tag)c[32545,32625]  
ggggatgtggcgaattggcagacgcgctagatttagattctagtcttcg  
ggtgtgggtcgaagtcctccatccctacca  
1-11tRNA-Ala(tgc)c[32871,32946]  
ggggcataggttatttggttaaacttactgccttgcaagcagtggaaact  
cagttcaattctgagtactccacca  
1-12tRNA-Ala(tgc)c[32953,33031]  
ggggaatgggtctgcatggagtggacacctcgttgaccaggagacatca  
gaacggttcgattccgttatttccacca  
1-13tRNA-Val(tac)c[33949,34022]  
gctcggttagtttaatgggagaaccccgctttacacggcggttgcgata  
gttcgattctatcaccgagtacca  
1-14tRNA-Lys(ttt)c[34027,34104]  
ggattgctagctcaactggataagagtagcggacctttaatccgtcagtt  
ctgggttcgaatcccaggaatccacca  
1-15tRNA-Met(cat)c[34745,34822]  
tcggggttagatctctggtagagatcgctagtcataagctagaaagag  
gtaggttcgattcctgcacccgcttcca  
1-16tRNA-Pro(tgg)c[34829,34907]  
ctccgtgtagctcagtttggccagagcgtttcgtttggggcgatagggtc  
ggggggttcaaatcctcccacggagacca  
1-17tRNA-Gly(gcc)c[35213,35287]  
gcgttcgtagttaaagggtataatttttggttgccaaccagaagttgag  
ggttcgattccctccgaccgacca

1-18tRNA-Lys(ctt)c[35501,35576]  
acatccatagctcaatggtagagctaccgcctctaagcggagggttct  
aggttcaagtcctagtggtgtacca  
1-19tRNA-Asp(gtc)c[35653,35729]  
gcgatcggggctggcttggaatggtactcccctgtcacgggagaaaatg  
tgggttcgaatcccatcggtcgcgcca  
1-20tRNA-Asn(gtt)c[36026,36108]  
gggtcgttagccaagcggttggcggaggactgtaatccatgtcgaaag  
acaacgtagggtcgaatcctacacggcccgcca  
1-21tRNA-Cys(gca)c[36116,36191]  
cgaccgttggctgaatggcttaggcggaggcctgcaaacctcctatgt  
gagttcgaatctcatcggtcgtcca  
1-22tRNA-Phe(gaa)c[36931,37005]  
gcgacttagctgagatggattagcgtctccctgaaaaggagaagaggta  
cgatcgttacgtacaggttcacca  
1-23tRNA-Trp(cca)c[37012,37088]  
attcctagagtgttactggacagcatgtcggctcctccaaaccgtacggtc  
taggttcgagtcctagtaggtttgcca  
1-24tRNA-Glu(ttc)c[37097,37173]  
gtcctgtagacaaactggtaaagtcactacccttcaaggtaggatttg  
cgggttcgatccccgcacaggacgcca  
1-25tRNA-Tyr(gta)c[37181,37271]  
gttgattagtagtagaggtagcgaagcagactgtaaatctgccgact  
cggaagggtctcgggtggttcgactccatcatccaacacca  
1-26tRNA-Leu(taa)c[38186,38262]  
gggggtgtaatcgaattggcataggtactggactaaaattcaggttttg  
tgggttcgaatcccaccaccctacca  
1-27tRNA-Met(cat)c[38812,38889]  
ggttctcaagctcatttggtatgagccgtcgcctcataagcgaaaggtag  
gtagggtcgaatcctccgggagccacca  
1-28tRNA-Ser(gct)c[38895,38988]  
ggaagattaaccctaaagtaaggagctgttgctaaacagccagtagc  
tgtggagacacggtgtgccagttcgaatctggcatcttctcca  
1-29tRNA-Arg(tct)c[42634,42708]  
cgggggtgtagtctaaggataggcaggagtcttctaaattcctttatgca  
ggttcgaatcctgtcacctcgcca

>EF579802.1 Microbacterium phage Min1, complete genome

1-1tRNA-Arg(tct)c[42,117]  
gcctccgtagctcagggatagagcagcggccttctaattcgcggtgcga  
tgggttcgaatccatccggggcacca

>DQ499600.1 Corynebacterium phage P1201, complete genome

1-1tRNA-Arg(tct)c[49943,50016]  
cccctagtagctcaaaggacagagcaatggatttctaccccataggttc  
aggttcgagtcctgcctaggggac

1-2tRNA-Gly(tcc)c[50276,50349]  
gcctcattgttccaatggtaagatgtctgactccaatcagacgatcgc  
ggttcgatttccgcatgaggctcc

1-3tRNA-Arg(cct)c[50536,50609]  
gccctggtagctcaatggatagagcagaggagtcctaactcctcaggttg  
aggttcgaatcctctctagggcgc

1-4tRNA-Tyr(gta)c[50880,50962]  
ccccgaccggcggaagatggagagtcgcacctgactgtaaatcaggcactt  
cggttgagtaggttcaaatcctatgtcggggac

1-5tRNA-Trp(cca)c[51019,51092]  
tcggatgtagttcaattggtagagcgtggtctccaaaccagaagttgc  
aggttcaagtcctgtcatccgggc

>EU744250.1 Mycobacterium virus Pukovnik, complete genome  
1-1tRNA-Gln(ctg)[5774,5848]  
tcctcgtagcacaaactggtagatgcgctcggtctggaccgagaggttt  
gaggttcgaatccttggcgaggagc

>EU816588.1 Mycobacterium phage Porky, complete genome  
1-1tRNA-Arg(cct)[61660,61743]  
atggcccgtagctcagtcaggtagagcagccttggccccttgcgggcttgg  
ttcgtccccggttcaaatccgggcgggccttgcc

1-2tRNA-Gly(tcc)[61746,61818]  
gcgcccgtggtcgaattggaaagactcctggcttccaccaggttatgca  
ggttcgagtcctgtcgggcgctc

>EU246945.1 Lactobacillus phage Lrm1, complete sequence  
1-1tRNA-Met(cat)[36665,36737]  
gtgagagtagctaagtggaaaagcgtcccgatcagcgcgacaatgcgt  
gggttcgattcccattctctcaca

>EU816591.1 Mycobacterium phage Kostya, complete genome  
1-1tRNA-Arg(cct)[62214,62297]  
atggcccgtagctcagtcaggtagagcagccttggccccttgcgggcttgg  
ttcgtccccggttcaaatccgggcgggccttgcc

1-2tRNA-Gly(tcc)[62300,62372]  
gcgcccgtggtcgaattggaaagactcctggcttccaccaggttatgca  
ggttcgagtcctgtcgggcgctc

>FJ188381.1 Stx2-converting phage 1717, complete genome  
1-1tRNA-Met(cat)[24379,24453]  
cggccctttagctcagtggtgagagcagcgactcataatcgccaggtcg  
ctggttcaaatccagcaaggccacc

1-2tRNA-Arg(tcg)[24456,24532]  
ccgccattagctcatcggtatagagcgtcagccttgaagctggttgcgc  
gaggttcgagtcggggtggtgtcca

1-3tRNA-Arg(tct)[24546,24622]  
gcgttgtagctcagcaggacagagcaattgccttctaagcaatcggtca  
ctggttcgaatccagtacaacgcgcca

>FJ429185.1 Lactococcus phage P087, complete genome

1-1tRNA-Pro(tgg)c[59413,59486]  
caggatatagtctcagcttggttagagcactgcttttgggaagcaggggtca  
aaggttcaaatcctttatcttga  
1-2tRNA-Asn(gtt)c[59542,59614]  
tgacctatagctcagttggttagagcgtcgactgttaatgcgaatgctgt  
aggttcaagtcctactgggtcag  
1-3tRNA-Asp(gtc)c[59656,59727]  
ggtttattagtagtggttattgcactcggtgtcagccgagtaacacg  
agttcgattctcgtatagaccg  
1-4tRNA-Thr(tgt)c[59730,59802]  
gccgatttagctcagttggttagagcgtctgattgttaatcagaaggtcac  
aggttcaagtcctgtagtcggca  
1-5tRNA-Cys(gca)c[59903,59975]  
ctccctgtgaccgagtggttaggtgcagctctgcaaaagctgatacgtc  
ggttcgaatccgactaggagtc

>GQ478086.1 Enterococcus phage phiFL3A, complete genome

1-1tRNA-Arg(tcg)[15705,15779]  
ttggcgtgtagcatttggttaatgcaactgacttcgtgtgagataagatg  
cgggttcgaatcctgtcacgccaat  
1-2tRNA-Met(cat)[38661,38734]  
ggaccattagctcagttggttagagccaaccgctcataacggttaggtca  
taggttcgagtcctgtatggtcca

>GQ478084.1 Enterococcus phage phiFL2A, complete genome

1-1tRNA-Arg(acg)[14629,14703]  
ttggcgtgtagcatttggttaatgcaactgattacgtgtgagataagatg  
cgggttcgaatcctgtcacgccaat  
1-2tRNA-Met(cat)[35352,35425]  
ggaccattagctcagttggttagagccaaccgctcataacggttaggtca  
taggttcgagtcctgtatggtcca

>GQ478081.1 Enterococcus phage phiFL1A, complete genome

1-1tRNA-Asn(gtt)[14594,14666]  
tggaatatagctcagttggttagagcgtacgactgttaatcgtagggtcat  
gagttcgagtcctgtattccag  
1-2tRNA-Met(cat)[37849,37922]  
ggaccattagctcagttggttagagccaaccgctcataacggttaggtca  
taggttcgagtcctgtatggtcca

>GQ452243.1 Enterococcus phage phiEf11, complete genome

1-1tRNA-Asn(gtt)[39646,39718]  
tggaatatagctcagttggttagagcgtacgactgttaatcgtagggtcat  
gagttcgagtcctgtattccag

>GQ478088.1 Enterococcus phage phiFL4A, complete genome

1-1tRNA-Met(cat)[37498,37571]  
ggaccattagctcagttggttagagcaaaccgctcataaccgttcggtca



caggttcgagccctgtatggcca

>HM152764.1 Mycobacterium phage Angelica, complete genome  
1-tRNA-Trp(cca)[994,1067]  
gggtgtgtagctcaattggcagagcagcggctctccaaagccgcccgttgc  
acgttcgagtcgtgccgcgcccgc

>HM152767.1 Mycobacterium phage CrimD, complete genome  
1-tRNA-Trp(cca)[978,1051]  
gggtgcgtagctcaatcggtagagcagcggctctccaaagccgcccgttgc  
acgttcgagtcgtgccgcgcccgc

>HM152763.1 Mycobacterium virus Bron, complete genome  
1-tRNA-Leu(caa)[60863,60937]  
ggctctgtaggcaaattggcaaagccgcgtcactcaaatgacgtgtctg  
tgggttcgagtcaccacgggactac  
1-2tRNA-Thr(cgt)[60938,61012]  
gctgccttagctcagatggctagagcgcgctctcgtaaagcgaggtcg  
cgggttcgaggcccgaggcagctc  
1-3tRNA-Lys(ctt)[61299,61372]  
gcctcgtagctcagttggtagagtcgccgactcttaacggtaggtcgc  
aggttcaaatcctgcacgggggtac  
1-4tRNA-Tyr(gta)[61383,61466]  
gcgtcggaggtagctgttgggttggtacacctgcctgtaaagcaggcgt  
tcggcttcgggggttcgattccctcccggcgtag  
1-5tRNA-Trp(cca)[61476,61549]  
agctcgtagctcaattggtagagcagcggctctccaaagccgtgggttcc  
ccgttcgagtcggggccgggttgc  
1-6tRNA-Leu(tag)[61550,61624]  
ggaactgtaggcaactggaaaagccgctgacttaggatcaggtgttg  
cgagttcgactctcgccagttctac  
1-7tRNA-His(gtg)[61625,61694]  
gctaagtagcttaattggtaaagcggccgttggccgggggtattccgg  
ttcgattccgggcttaagcc  
1-8tRNA-Cys(gca)[62874,62947]  
gccgctgtggccgagtggttaggcaccggcctgcaaagccggttagtccg  
gttcgattccggaggcggctcca  
1-9tRNA-Lys(ttt)c[63228,63302]  
gccctatagctcagttggtagagctatcgcttttaagcgacaggtcgc  
aggttcgagtcctgctgggggcacc

>HM029250.1 Lactococcus phage 949, complete genome  
1-tRNA-Met(cat)[42403,42475]  
ggctcttagcttaattggtaaagtcctccgccataacggagtaagtc  
aggttcaagccctgcaagagcca  
1-2tRNA-Arg(tct)[43986,44058]  
gttcggtagtgaattggataacacataatttctaattatgtactct  
ggattcgagttccagactgagca

1-3tRNA-Asp(gtc)[44843,44915]  
gattcattggtgtagtgggtatcacgcttgcctgtcacgcaagagaacag  
gggttcgaatcccctatgaatcg

1-4tRNA-Pro(tgg)[45463,45534]  
caggatatggtgtaatggtagcatgcgtgtttgggaacatgtagtgct  
ggttcgagtcagctatcctga

1-5tRNA-Pyl(cta)[46865,46937]  
tgcgaacatagatatgtggaatgctacagactctaagatgtaaactga  
ggttcgattcctactgttcgtat

1-6tRNA-Trp(cca)[46993,47064]  
atccgttttagttagtggttaacacatcagattccaacctgataacgtg  
ggttcgattcctacaatggatg

1-7tRNA-Met(cat)[47277,47350]  
tacagggtgggtggcaaggcgtcacgctagttcataagctagaatagaa  
cggttcgattccgttacctgaat

>HM144386.1 Brochothrix phage BL3, complete genome

1-1tRNA-Asn(gtt)[40805,40876]  
tgagatatggctcaatggtagagcaccgcactgttaatgcgtaggttata  
ggttcgagtcctgttatctcag

>HQ406778.1 Enterobacteria phage SPC35, complete genome

1-1tRNA-Met(cat)c[27768,27843]  
agttagttggcagagtggtatgcacctcctcatacggagcgactacag  
tggttcaaatccactactaactacca

1-2tRNA-Ile(gat)c[27940,28016]  
gcttcgtagcttagcgatctaaagcactcggctgataaccgagagatcg  
ggggtttaaaccctcccgagtacca

1-3tRNA-Thr(tgt)c[28592,28666]  
gctcctaaagcattgttggcgaatgcagttgccttgaagcatctgaaccg  
ggttcgactcctggtgggagcacca

1-4tRNA-Gly(tcc)c[29101,29175]  
gcgtgattagttcagtggtagaataactggctccaaccagtagacacg  
agttcgactctcgtatcccgaccca

1-5tRNA-Gln(ttg)c[29182,29256]  
tggagagtagtgaacggttagcactggagatttgaatctcttagttag  
ggttcgaatccctactttcctgcca

1-6tRNA-Gln(ctg)c[29263,29338]  
tgggatgtagatcaattggcagatcgtcggcctctgactccgaaggttcc  
acgttcaatccgtggcatcccagcca

1-7tRNA-His(gtg)c[29571,29647]  
gtggctatatcataattggttaatgatcctgattgtgaatcaggcctatg  
tggattcgaattccactagccacccca

1-8tRNA-Ser(tga)c[30215,30304]  
agaagataggacgtagtggtacgtaactggtcttgaaccagcccgcgg  
tagcgatacggtaggttcgactccattatcttctgcca

1-9tRNA-Leu(tag)c[30514,30590]  
gcgtgattgatggaatgggcatacataccgtccttagaagtcgggttttg  
agggttcgaatccctgtcacgcacca

1-10tRNA-Ala(tgc)c[30596,30674]  
ggggaatgggtctgcatggagtggacacctcgttcaccgaggacatca  
gaacgggttcgattccgttattctccacca

1-11tRNA-Lys(ttt)c[31054,31132]  
agatcgctagctcaataggtttagtagcatccgactttaatcggaaggt  
tctgggttcgagtcgccagcgatctacca

1-12tRNA-Met(cat)c[31322,31399]  
tgcgggttagatctctggtagagatcgctagtctcataagctagaagag  
gtaggttcgattcctgcacccgcttcca

1-13tRNA-Pro(tgg)c[31406,31481]  
cagtcgctagcgcagttggtagcgtgggagccttgatgcttcgggtcgc  
agggttcgagtcctgccgcactgacca

1-14tRNA-Lys(ctt)c[32516,32591]  
acaccatagctcaatggtagagctaccgcctcttaagcggagggttct  
agggtcaagtcctagtggtgtacca

1-15tRNA-Asp(gtc)c[32769,32845]  
gcgaccggggctggcttggtaatggtactcccctgtcacggagggaatg  
tgggttcaaatcccatcggtcgcgcca

1-16tRNA-Asn(gtt)c[33143,33225]  
gggtcgtagccaagcgggttggcgggtgactgtaatccatgtcgaaag  
acaacgtagggtcgaatcctacacggcccgcca

1-17tRNA-Cys(gca)c[33235,33310]  
cgaccgttggtgaatggcttaggcgaaggattgcaaatccttttatgt  
gagttcaaatctcatgcggtcgtcca

1-18tRNA-Phe(gaa)c[33943,34017]  
gcaccttagctgagatggattagcgttcctgaagagcttgagaggtt  
cgttcgattcgaacagggtgcacca

1-19tRNA-Glu(ttc)c[34104,34178]  
gcacctatcgtctagtggttaggacaccactctttcacagtgggaacag  
agttcgatcctcgttgggtgtgcca

1-20tRNA-Tyr(gta)c[34186,34273]  
gggcgtttattccgtaagtggtagcggagggttgtaaatccctagtca  
ttgcgactcgagtgggtcgactccattaacgcccacca

1-21tRNA-Ser(gct)c[35304,35392]  
ggaagaatagcataacggtattgcagcagattgctaactgtcggtttga  
aatatagccttggtggttcgattcccacttcttcgcca

1-22tRNA-Arg(tct)c[38936,39010]  
cggggtgtagtctaaggagagagcaggagtcttctaaattccttatgca  
ggttcgaatcctgtcacctcgcca

>JF744988.1 Mycobacterium phage Faith1, complete genome

1-tRNA-Thr(cgt)[62646,62719]

gccaccttagctcagttggtagagcagccccttcgtaacgggcaggtcag  
cggttcgattccgctaggtggctc  
1-2tRNA-Pro(tgg)[62947,63021]  
ctggctgtagctcaactggtagagcgtggcttgggtgccaggggttg  
caggttcaaactctgtagccagac  
1-3tRNA-Trp(cca)[63142,63215]  
agctcggtagctcaattggtagagcagcgggtcctcaaagccggttcc  
ccgttcgagtcggggtcgggttc  
1-4tRNA-Tyr(gta)[63326,63408]  
gtggtggttgggcttgtggtggccacctgactgtaaatcaggcgtt  
cggcaccgggggttcgattccctcccaccacac  
1-5tRNA-Leu(tag)[63822,63896]  
ggccctctagccaattggcagaggcacagtttaggtacctgtcagtg  
cgagttcgagtctcgggggccac  
1-6tRNA-His(gtg)[63897,63966]  
gcttagtagcctagtggttaaggcagccggttgatccggtgaacctgag  
ttcgattctcagctaaagcc  
1-7tRNA-Gln(ctg)[63971,64045]  
tgaccgtagcacaactggtagttgcgccgctctggacgagggttg  
ttggttcgatcccagctcggtcagc  
1-8tRNA-Gly(tcc)[64161,64235]  
gtgtagtaacccatgttggtgggtgcctgacttcactcaggatttcg  
cgggttcgattcctgtctagcacac  
1-9tRNA-Lys(ctt)[64278,64355]  
tgccctgtagctcagttggtagagctccgactcttaacggtaggtca  
caggttcaagtctgtacgggtaccca  
1-10tRNA-Cys(gca)[65545,65618]  
gccgtcatggctgagtggttaggcgtcggactgcaaatccggcttatccc  
agttcgattctgggtggcggtcc  
1-11tRNA-Asn(gtt)[65980,66053]  
tcctccgtagctcaattggcagagcgcgcgactgtaacgcgtggttg  
tggttcgagtcacccgttggagc  
1-12tRNA-Lys(ttt)[66247,66321]  
gccctatagctcagttggtagagcaggagactttaatcttcgggtcct  
aggttcgatccctagtgggggcacc

>HM208537.1 Escherichia phage HK639, complete genome

1-1tRNA-Ile(gat)[33694,33763]  
ggggtgtggctgggctgcatggactgatcacccatgaaaacttcggttc  
gaatccggagcactccacca  
1-2tRNA-Asn(gtt)[44363,44437]  
gggtcagaagcacagcgggttgcttcggctgtaaccgaatggtcgaa  
ggttcgaatcctctgtcccacca

>JN035618.1 Gordonia phage GTE7, complete genome

1-1tRNA-Asn(gtt)[13421,13494]

tgtgatatagctcaattggcagagcgctggactgttaatccggtggtga  
 aggttcgagtccttctatcacagc  
 >JN116826.1 Rhodococcus phage RGL3, complete genome  
 1-tRNA-Gln(ctg)[46429,46500]  
 tccccgttcgtctaattggcaggacgccgcgtctggacgcggaatcgag  
 gttcgagtccttgacggggagc  
 1-3tRNA-Trp(cca)[46643,46716]  
 gggcacgtagctcaattggtagagcaccggtctccaaagccggtggttg  
 gggttcgagtcctccgggcctgc  
 >HQ665011.1 Escherichia phage bV\_EcoS\_AKFV33, complete genome  
 1-tRNA-Met(cat)c[27840,27915]  
 agttagttggcagagtggttatgcacctccttcatacggagcgactacag  
 tggttcaaatccactactaattacca  
 1-2tRNA-Ile(gat)c[28012,28088]  
 gcttcggtagcttagcgatctaaagcactcggctgataaccgagagatcg  
 ggggtttaaaccctcccgagtacca  
 1-3tRNA-Thr(tgt)c[28664,28738]  
 gtcctaaaagcattgttggcgalgcagttgccttgaagcatctgaaccg  
 ggttcgattcctggtgggagcacca  
 1-4tRNA-Gln(ttg)c[29227,29302]  
 tggagagtagtgaacggtagcacaacggcctttgactccgttaatggt  
 aggttcgattcctccttctccagcca  
 1-5tRNA-Gln(ctg)c[29309,29384]  
 tggagtgtagatcaattggcagatcgtcggccttgactccgaaggttcc  
 tggttcgatcccaggcactccagcca  
 1-6tRNA-His(gtg)c[29617,29693]  
 gtggctatatcataattggttaatgacctgattgtgaatcaggcctatg  
 tggattcgaattccactagccacccca  
 1-7tRNA-Leu(tag)c[30369,30445]  
 gcgtgattgatggaatgggcatacataccgtccttagaagtcgggttttg  
 agggttcgaatcccttgcacgcacca  
 1-8tRNA-Ala(tgc)c[30451,30529]  
 ggggaatgggtctgcatggagtggacacctcgttgcaccgaggacatca  
 gaacggttcgattccgttattctccacca  
 1-9tRNA-Val(tac)c[31168,31241]  
 gctcggtagtttaattgggagaaccccgctttacatggcggttgagata  
 gttcgattctatcaccgggtacca  
 1-10tRNA-Lys(ttt)c[31246,31324]  
 agatcgctagctcaataggttagtagcatccgacttttaacggaaggt  
 tctgggttcaagtcccaggcgatctacca  
 1-11tRNA-Met(cat)c[31514,31591]  
 tgcgggttagatctctggtagagatcgctagtctcataagctagaaagag  
 gtaggttcgattcctgcacccgcttcca  
 1-12tRNA-Pro(tgg)c[31598,31675]

ctccgtgtagctcagtttggccagagcgtttcgtttggggcgatagggtc  
gggggttcaaactcctcccacggagacca  
1-13tRNA-Lys(ctt)c[32666,32741]  
acatccatagctcaatggtagagctaccgcctctaagcggagggttct  
aggttcaagtcctagtggtgtacca  
1-14tRNA-Asp(gtc)c[32919,32995]  
gcgaccggggctggcttggtaatgtactcccctgtcacgggagggaaatg  
tgggttcaaactccatcggtcgcgcca  
1-15tRNA-Asn(gtt)c[33293,33375]  
gggtcgttagccaagcggttggcggtagactgtaatccatgtcgaaag  
acaacgtaggttcgaatcctacacggcccgcca  
1-16tRNA-Cys(gca)c[33382,33456]  
gcatccttgtccgagtggttaggtgacggctgcaaaatcgtctaggtt  
ggttcaattccagcagggtgctcca  
1-17tRNA-Phe(gaa)c[34209,34283]  
gcaccttagctgagatggattagcgttgcctgaagagcttgagaggtt  
cgttcgatacgaacagggtgcacca  
1-18tRNA-Trp(cca)c[34290,34366]  
attcctagagtgttactggacagcatgtcgggtctccaaaccgtacggtc  
taggttcgagtcctagtaggttgcca  
1-19tRNA-Glu(ttc)c[34375,34451]  
gccctgtagacaaactggtaaagtcactacccttcaaggtaggatttg  
cgggttcgatccccgcacaggacgcca  
1-20tRNA-Tyr(gta)c[34459,34549]  
gttgattagtagtctagaggtagcgaagcagactgtaaatctgccgact  
cggaagggtctcgggtggttcgactccatcatccaacacca  
1-21tRNA-Leu(taa)c[35426,35502]  
gggggtgtaatcgaattggcataggtactggactaaaattcaggttttg  
tgggttcgaatcccaccaccctacca  
1-22tRNA-Ser(gct)c[36092,36180]  
ggaagaatagcataacggtattgcagcagattgctaattctcggttga  
aataatagccttgtgggttcgattcccacttcttcgcca  
1-23tRNA-Arg(tct)c[37799,37873]  
cggggtgtagtctaaggagaggcaggagtcttctaaattccttatgca  
ggttcgaatcctgtcacctcggcca

>JN116823.1 Rhodococcus phage REQ2, complete genome

1-1tRNA-Leu(taa)[30212,30288]  
gtccgagtcgctccgggctgtcagcggccgactaaaatccgccgag  
tgtgggttcgagtcctcactgggggcac  
1-2tRNA-Ser(cga)[48487,48575]  
ggaagatgaaccgcgaatggtcgcgggaccctcgaaagcggatcgggc  
gtgcaagcgtcaggggttcgattcctccgtcttcgcca  
1-3tRNA-Ser(gct)[48577,48662]  
ggagagtgaccacaccgggtgtggatcgctgtacgcaatcgtgga

cacagcgccatgaggttcgactcctccactctccgc  
 >HQ711985.1 Pseudomonas phage vB\_PaeS\_PMG1, complete genome  
 1-tRNA-Gly(tcc)[50917,50992]  
 gcggctctagctcaactggcagagcgctgtcctccaagtcagatgttgc  
 gggttcaagtcgccgagccgctcca  
 >JN116827.1 Rhodococcus phage RER2, complete genome  
 1-tRNA-Asn(gtt)[44961,45034]  
 tcacgtatagctcaatcggcagagcaacgcactgttaaggcgggggtga  
 aggttcgagtccttctacgtgagc  
 1-3tRNA-Trp(cca)[45160,45234]  
 gggcacgtagctcaattggatagagccccggctcctaagccggtgggtg  
 ggggttcgagtcctccgggcctgc  
 >HQ698895.1 Synechococcus phage S-CBS4, complete genome  
 1-tRNA-Thr(tgt)c[4456,4527]  
 gcccttagctcagtggtagagcagcgtttgtaaagcgttgcgca  
 agttcgactcttgcgggggct  
 >JX182372.1 Streptomyces phage TG1, complete genome  
 1-tRNA-Thr(cgt)[39556,39630]  
 gccttctagctcagttggccagagcatccgttcgtaatcggaaggtcg  
 acggttcgaatccgtcggaaggctc  
 >JF946695.1 Mycobacterium phage SWU1, complete genome  
 1-tRNA-Asn(gtt)[4193,4265]  
 tgacgttagctcaatggcagagcggcgactgtaatcgggtggtgaa  
 ggttcgagtccttccatgtcagc  
 1-2tRNA-Trp(cca)[4343,4416]  
 gtacacgtagctcaattggtagagcagcggtctcaaagccgcggttcc  
 aggttcgactcctggcgtgtatgc  
 1-3tRNA-Gln(ctg)[4472,4546]  
 tccccgttcgttaatcggttaagacacccggctctggaccgggcaattga  
 ggttcgagtccttggcggggagcca  
 >JX182369.1 Streptomyces phage phiHau3, complete genome  
 1-tRNA-Trp(cca)[1200,1270]  
 gcgttcgagcgcgtgggcgcggcgtctcaaagccgagtcagcagg  
 ttcgactcctgccggcgtgc  
 >AB712291.1 Enterococcus phage BC-611 DNA, complete genome  
 1-tRNA-Trp(cca)[29838,29911]  
 cgagtggtagtgaatggtagcacaacagtcctcaaaactgttagaga  
 ggggttcgattccttactgctgt  
 >JQ965645.1 Salmonella phage SSU5, complete genome  
 1-tRNA-Lys(ttt)c[30485,30565]  
 aatttgctgggcaacggttagattgcctgggcgcctttgtgccgcaa  
 ccacaatgatcttggtcattggtgagttccc  
 1-2tRNA-Asn(gtt)[42525,42599]  
 gatggtgtagctcagtggtagagcggtgactgtaatcaactggtcgtg

ggttcgagtcacccaccatcgcca  
 >JX195166.1 Pectobacterium phage My1, complete genome  
 1-1tRNA-Gln(ctg)c[26934,27009]  
 tgaagtatagctcaattggtagagcgctgactctgactcaggagggtta  
 aggttcgagacctatacttcagcca  
 1-2tRNA-His(gtg)c[27132,27208]  
 gtggccgaagcatttattggatgatgttcgatctgtgacatcgaggaag  
 tgggatcggtaccaccggtcaccca  
 1-3tRNA-Ser(gga)c[28674,28765]  
 ggaagaacaaatagactggcgactaaaactgcttgaaagtagctgactg  
 gagaaatccggcttgagagttcgaatctctcttccgcca  
 1-4tRNA-Leu(tag)c[29278,29362]  
 ggggttatgctggaactggtagacaatacagtcttagaatctgtagctta  
 aatgcgtgggagttcgagctccctagccccacca  
 1-5tRNA-Val(tac)c[29933,30007]  
 gctcgcttagttcaacggttagaatactagccttacatgctagggatgat  
 agttcgattctatcagcgagtacca  
 1-6tRNA-Ile(gat)c[30016,30091]  
 gctctgatagttcagttggttagaacaggcgaccgataatcgccaaacac  
 tggttcgagtcagttcggagtacca  
 1-7tRNA-Gly(tcc)c[30706,30780]  
 gcgtgattagttcagtggttagaataactggctccaccagtagacgag  
 ggttcgactccctcatcccgacca  
 1-8tRNA-Met(cat)c[31551,31628]  
 agtgtatgggtagtcacggtgaatacggcactttcatacggtcgctcgag  
 attggttcgatttcaatatacactacca  
 1-9tRNA-Leu(taa)c[31718,31794]  
 gcatcactggccaattggtagaggcatgaggcttaagacttcagagttc  
 ccagttcgaatctgggtggtgtacca  
 1-10tRNA-Lys(ctt)c[32492,32568]  
 tgcttgctagctcaactggttagagcactcgctcttaagcgataggtta  
 tgattcaagtctcatgcagggtacca  
 1-11tRNA-Ala(tgc)c[32658,32736]  
 ggggaatgggaatgctaggagtggtcacctcgcttgaccgaggatacca  
 gtggggttcgaatccccaatttccacca  
 1-12tRNA-Pro(tgg)c[32742,32817]  
 ctccgattagctcaattgatagagtgcgccgttggggcggtgaggtga  
 aggtttgagtccttcattggagacca  
 1-13tRNA-Thr(tgt)c[33713,33787]  
 gcctccaaagcattagtggcgatgcagttgccttgaagcatcagaattc  
 ggttcgattccggatggggcacca  
 1-14tRNA-Lys(ttt)c[34480,34556]  
 ggattgttagccaaatggttaaggcaccggacttttaacgggggattg  
 aaggttcgagtccttcacagtcacca



1-15tRNA-Gly(gcc)c[34881,34954]  
gcgttcgtagttaaatggtataatttctggttgccaaccagaggttgaga  
gttcgattctctccgaccgcacca  
1-16tRNA-Lys(ctt)c[35161,35237]  
gcttcttagctcaattggttagactaccgactcttaatcggagggtta  
taggttcaagtcctatagagacacca  
1-17tRNA-Asp(gtc)c[35406,35482]  
gcgatcggggctggcttggaatggtactcccctgtcacgggagaatatg  
tgggttcaaattcccatcggtcgcgcca  
1-18tRNA-Asn(gtt)c[35489,35566]  
ggttccttagctctaattggttagagcggcatcttgtaagttgagggtt  
gctggttcgaatccagcaggaaccgcca  
1-19tRNA-Trp(cca)c[36999,37075]  
atcgaccgagtggtactggacagcataccggtctccaaaaccgtgtggtt  
agggttcgagtccttagtctttgcca  
1-20tRNA-Arg(acg)c[37832,37906]  
gcagacatagtttaacggaaagaatctatagctacgaactatagggtggt  
ggttcgattccatctgtctgtacca  
1-21tRNA-Gln(ttg)c[37913,37988]  
tggaaactagtgtactggttagcacagggcctttgactcccctagatt  
agggttcaattcctacagttcctgcca  
1-22tRNA-Met(cat)c[38089,38164]  
tgcgagtttagagttctggtgaactcatgaggctcatatcctcatccagaa  
agggttcgattccttactcgttcca  
1-23tRNA-Glu(ttc)c[38172,38246]  
gcacctatcgtctaattggttaggacaactgcctttcgagcagtgaatcgg  
agttcgattctccgtgggtgtacca  
1-24tRNA-Tyr(gta)c[38253,38333]  
gtgggattggcacagcggcgactgcgggagactgtaaatctcctatacta  
cacctagggttcgagtcctagatcccacacca  
1-25tRNA-Ser(gct)c[38821,38912]  
ggaagggttcactaatttggttaagtgagcggactgctaattccatcgggtt  
ggtaaaacagccttcagggttcaagtcctgtcctccgcca  
1-26tRNA-Arg(tct)c[39776,39852]  
gcgctcttagctcaattggacagagcaacgtagtcttaattcgtagggtta  
cagggttcgaatcctgtaggcggtacca  
1-27tRNA-Leu(tag)c[40909,40981]  
tgccctcttggtctagttggaaatgatagtaggggtacaggcgta  
ggttcgagtcctacagtgggaaa

>JX182370.1 Streptomyces phage R4, complete genome

1-1tRNA-Phe(gaa)[1094,1167]  
gggccggtagctcagttggaagagcggcggagtgaatcccgaggtcgc  
agggttcgagtcctgcctggccac

>JX100810.1 Caulobacter phage CcrColossus, complete genome

1-tRNA-Trp(cca)[59240,59325]  
acgggaattccagagcgggtcaaatgggctgggtctccaaaaccagcggcgc  
aagccttcgggggttcgaatccctcttcccgtgcc  
1-2tRNA-Gly(gcc)[59336,59412]  
gcgtctatagtatatggctgattacccttcgttgccaacgaagagagg  
cgggttcgattcccgtagacgtcca  
1-3tRNA-Gly(tcc)[59417,59490]  
gcgtccgtagctcaatggtagagcaatgggctccaccccggtgctcgtgg  
gttcgatccccaccggacgtcca  
1-4tRNA-Glu(ttc)[60055,60133]  
ggggccttcgtctaaactggactaaggatagccggctttcaccggcaga  
tcggggttcgaaccccgtagcccttcca  
1-5tRNA-Asp(gtc)[60149,60223]  
ggtgcgttcgtatatcggtaatacaccggactgtcgatccgggaagacg  
ggttcgactcccgtagcaccgcca  
1-6tRNA-Pro(cgg)[61499,61576]  
ctgcgttagctcagctcgtgtagagcgtcggccggagccgaggggtc  
gtaggtcaaatcctgctacgcagacca  
1-7tRNA-Pro(tgg)[61584,61658]  
cagagtctggccgagcggctaggcaccggtttgggaaccggacgagggcg  
ggttcaactcctcgggctctgacca  
1-8tRNA-Pro(ggg)[61660,61736]  
cagtggtggcgcagtttggtagcgcgttgctcgggatgcaagaggtcg  
caggttcaaatcctgctacactgacca  
1-9tRNA-Lys(ctt)[62019,62108]  
gggtgagttctccgagcggtcgaaggggagtgactcttaatcacttggac  
gaaagtcccaccgtgggttcgaatcccacctcacctcca  
1-10tRNA-Leu(cag)[62115,62202]  
cccgtgtgacgaagtttggtagacgtgcgagtttcagatactcgtgcc  
gagaggcggggaggttcgaatcctctcaccgggacca  
1-11tRNA-Leu(caa)[62210,62296]  
gcccaactggtcgaatggcagacgcaggatactcaaaatatccggaccg  
caaggtcgtcccgttcaagtccgggttgggcacca  
1-12tRNA-Leu(gag)[62304,62391]  
cgcagcgtggcggagctcgttagacgcgccatcttgagagggtggtgtcc  
gaaaggcggggaggttcgaatcctctcgtgcgacca  
1-13tRNA-His(gtg)[62400,62474]  
tctggtgtagtcgagtggttaagacccgcattgtggatcggaggctct  
ggttcaatcccagcaccagtacca  
1-14tRNA-Ala(tgc)[62479,62553]  
ggggatgtagctcaggggtagagcggctgtttgcaagcagcgggtcggg  
ggttcgaatccctccatctccacca  
1-15tRNA-Ser(tga)[62821,62908]  
ggatgtatggctgagaggctgaaagcggcgttggaaaacgggtcgacc

gcaaggctgcgggagttcgaatctctctacatccgcca  
 1-16tRNA-Val(gac)[68535,68609]  
 ggcaggttagttcagagtagaacgccgctatgacatggcggatgtcggg  
 ggtcaattccctcacctgctacca  
 1-17tRNA-Ile(gat)[68611,68686]  
 cctagttagctcagttggtagagcagcggatcgataatccgccgctcgc  
 cggttcgatcccgccgctaggtcca  
 1-18tRNA-Ile(gat)[68695,68770]  
 tggggcatagctcaggggttagagcgcgcgcttgataagcgtgaggccgt  
 tggttcgagaccaactgtccctacca  
 1-19tRNA-Val(cac)[68805,68880]  
 cgcgaaaggccagatgggacggcaggggtgtcacatacctcgattgact  
 gtgttcgattcacaggtcgcgacca  
 1-20tRNA-Gln(ctg)[68888,68961]  
 tgggggatcgtctaattgtaggacggtagagtcgttctacagatatag  
 gttcgagtcctattccccatcca  
 1-21tRNA-Gln(ttg)[68968,69041]  
 tctcgggtggtctaattgtaggacatctggtttggtccagagggtggg  
 gttcgattccttggccgagagcca  
 1-22tRNA-Asn(gtt)[69054,69142]  
 tctcatgtggcgaactggtaaacgcaccggactgttaatccggcgtctc  
 gcaagagacttgggggttcgaagccctccgtgagagcca  
 1-23tRNA-Arg(acg)[69159,69255]  
 gctcggcgaaatgccctggtaacccggcgcgcactacgaatgcgcgagc  
 ctagctggagttgaaaaggctggttcgaatccagcccagggcgcca  
 1-24tRNA-Arg(acg)[69260,69337]  
 agcgaatagctcagtgatttagagcgttcccctacgaagggaagggtc  
 gggggttcgagtcctccatcgctgcca  
 1-25tRNA-Cys(gca)[132216,132302]  
 gctcaggtggactgagtggttaaggcgtgggactgcaaatcccgtggcga  
 aagcctatcgtgggttcgattccactcgtagctcca  
 1-26tRNA-Met(cat)[132962,133038]  
 tgcggggtggagcagtcggtagctcgtttggctcataacaaaaggctcg  
 agggttcaaatccctccccgcaccca  
 1-27tRNA-Met(cat)[133537,133623]  
 ggtgtggtggctcgacaggaaggcgcggcctcataagccggagggcga  
 aagtctatgtaggttcgaatcctactcacacctcca  
 1-28tRNA-Arg(tct)c[249029,249104]  
 ggtcccttggccaactggagaggcagccctcttctaaaggcgggtac  
 tggttcgagtcagtagggatcgcca  
 >JX100809.1 Caulobacter phage CcrSwift, complete genome  
 1-tRNA-Trp(cca)[47039,47114]  
 gtcggttagctcatgggtagagcggcggctccaaaaccgcgcgtggc  
 aggttcgagtcctgcgaccggcgcca

1-2tRNA-Gly(gcc)[47120,47194]  
gcgtccatcgtatatgggttattgcttcgcgttgccaacgcgacgaaccg  
ggttcgagtcgccggtggacgctcca  
1-3tRNA-Gly(tcc)[47201,47274]  
gcggatatagtctaaaggagagctactgccttccaagcagaagatgcgg  
gttcgagcccgctatccgctcca  
1-4tRNA-Glu(ttc)[47431,47508]  
ggcccggtcgtctagcggttgcaggattcgtgactttcaatcacgagag  
cggagttcaggtctccgtcgggcctcca  
1-5tRNA-Asp(gtc)[47532,47606]  
ggtgcgttcgtatatcggtaatactccgattgtcgatccggcaagagg  
ggttcgattcccctacgcaccgcca  
1-6tRNA-Pro(cgg)[48467,48542]  
cggggtgtagctcagtcggtagagcgctcgggtcgggaccgagaggccgt  
gggttcgagtcgccccacccagacca  
1-7tRNA-Pro(ggg)[48550,48624]  
cgggatgtagctcagcggtagagcgcggctggggccgcgagggccgca  
ggttcgagacctgccacccgacca  
1-8tRNA-Lys(ctt)[48813,48899]  
ggatgtgtcacctcagtgccgagaggaccgggctcttaatccggcagcga  
aagctcatcgtgggttcgagtcaccacacatcctcca  
1-9tRNA-Lys(ttt)[48907,48996]  
gcacgagtgacccgagcggcgaaggcgctcgacttttaatcgactgggcg  
tcacgctcaccgagggttcgagtcctcctcgtgctcca  
1-10tRNA-Leu(cag)[49003,49088]  
gcgaaagtggcggaacaaggtagacgcaccggtctcaggtaccggcggt  
tcggtcatgagggttcgagtcctcctttcgtacca  
1-11tRNA-Leu(caa)[49096,49180]  
gccggtctggcggaatggcagacgcagtggttcaagtcaccgcctt  
cgggcgtcccggttcgatccggggaccggcacca  
1-12tRNA-Leu(gag)[49187,49274]  
tgcgaagtggcggaatttggtagacgcaccggcatgagaggccggcgccc  
ttcggggcgtgagggttcgagtccttcttcgcgacca  
1-13tRNA-Ala(tgc)[49365,49435]  
ggggatatcgcagggcgcaggcatcctttgcaaggaaagtcgggtgggtt  
cgagtcacatactccacca  
1-14tRNA-Ser(cga)[49440,49527]  
ggttaggttggtctgagaggccgaaggcgcccgttcgaaaacgggagaacc  
gcaaggttcggtgggttcgaatcccacactacctcca  
1-15tRNA-Ser(gga)[49532,49619]  
ggatgtatggctgagaggccgaaggcgcccgttgaaagcgggtgaacc  
gcaaggttcgtaggttcgaatcctactgcacccgcca  
1-16tRNA-Phe(gaa)[50907,50982]  
ggactcgtagctcagcaggtagagcggcgttgaaaccccgaggtcgg

aggttcgattcctcccgtttccacca  
1-17tRNA-Val(gac)[50988,51063]  
gcccgatgagccagatgggaaggcgcgccgtgacatggcgggattgaga  
aggttcgattccttcacagcacca  
1-18tRNA-Ile(gat)[51066,51141]  
gcaagtgtagctcagtcggtagagcagcgaccgataatccgcctgtccc  
tggttcgagtcaggcatttgcacca  
1-19tRNA-Ile(gat)[51149,51223]  
tgtggcatagctcagggtagagcgcgccttgataagcgtgaggtcggg  
ggttcgaagccctctgccactacca  
1-20tRNA-Val(cac)[51257,51332]  
tggcgttagcatagtgggagtcagggtgtcacatacctcgatcgaac  
tggttcgattccagtaacgccaacca  
1-21tRNA-Gln(ctg)[51338,51411]  
tgagggttcgtctaacggtaggacggctgggtcgtccagctaattctag  
gttcgagtcctagcccctcatcca  
1-22tRNA-Gln(ttg)[51419,51492]  
tctcgggtggtctaattggaagacatctggtttggtccagaggattggg  
gttcgattccttggccgagaacca  
1-23tRNA-Ile(aat)[51508,51582]  
tccagtcaatgcacaagggtgtgcagcgccactgttaatgcctgtgagccc  
ggttcgattccggggtctggagcca  
1-24tRNA-Arg(tct)[51785,51862]  
gcgcgggtagctcaatggaccagagcagccgtcttctacacggtgggtt  
gggggttcgagtcctccccgcgcgcca  
1-25tRNA-Cys(gca)c[101259,101347]  
gcttcggtggactgagaggttaggcgcgggattgcaaatctctgctggtg  
ggaacacctatgagggttcgagtcctcccgaagctcca  
1-26tRNA-Lys(ctt)c[101927,102000]  
tttcgaatagcacagtggtagtgaacagcctctaagctgtcggtcgc  
gggttcaatccccgcttcgatgaa  
1-28tRNA-Met(cat)[103075,103153]  
cgcgggtagaggagtcgggtgtcctcgtctggctcataaccaggagat  
cgtgggttcaaatcccactcccgtccca  
1-29tRNA-Met(cat)[103563,103647]  
ggtacggtggctcgacaggaaggcatcgccctcataagccgagggttcg  
tcccaatcctggttcaaatccaggtcgtacctcca

>JQ806764.1 Salmonella phage vB\_SosS\_Oslo, complete genome

1-1tRNA-Asn(gtt)[45678,45752]  
gggtcagtcgtataaaggtcattacggaaggctgtaaccttctatcgt  
ggttcgagtcacgctggcccccca  
1-2tRNA-Thr(tgt)[45758,45833]  
gctggttagctccaatggtagagcggtcgccttgtaagcgaatgggtag  
cggttcaagtccgttaaccagcacca

>JN986845.1 Enterobacteria phage vB\_EcoS\_ACG-M12, complete genome

1-tRNA-Arg(tct)[3487,3561]

gctctgttagcttaatggaaaagccgcagccttctaagctgttgatggt

ggttcgactccaccacggggcgcca

>JX100813.1 Caulobacter phage phiCbK, complete genome

1-tRNA-Trp(cca)[47786,47861]

gtcggtagctcatgggtagagcggcggtctccaaaccgcgcgtggc

aggttcgagtcctgcgaccggcgcca

1-2tRNA-Gly(gcc)[47867,47941]

gcgtccatcgtatatgggttattgcttcggttgccaacgcgacgaaccg

ggttcgagtcgggtggacgctcca

1-3tRNA-Gly(tcc)[47948,48021]

gcggatatagctcaaaggagagctactgccttccaagcagaagatgcgg

gttcgagccccgctatccgctcca

1-4tRNA-Glu(ttc)[48178,48255]

ggccccggtcgtctagcggtttcaggaattcgtgactttcaatcacgagag

cggagttcgagtcctccgctcgggcctcca

1-5tRNA-Asp(gtc)[48278,48352]

ggtgcgttcgtatatcggtaataactccgattgtcgatccggcaagagg

ggttcgattcccctacgcaccgcca

1-6tRNA-Pro(cgg)[49792,49867]

cggggtgtagctcagtcggtagagcgtcggtcgggaccgagaggccgt

gggttcgagtcgccaccagacca

1-7tRNA-Pro(ggg)[49875,49949]

cgggatgtagctcagcggtagagcgcggctggggccgcgagggccgca

ggttcgagacctgccaccgacca

1-8tRNA-Lys(ctt)[50140,50226]

ggatgtgtcacctcagtggtcagagaggaccgggtcttaatccggcagcga

aagctcatcgtgggttcgagtcaccacatcctcca

1-9tRNA-Lys(ttt)[50233,50323]

gcacgagtgacccgagcggcgaaggcgctcgacttttaatcgactaggcg

tccgcgcctcaccgaggttcgagtcctcctcgtgctcca

1-10tRNA-Leu(cag)[50330,50413]

gcgaaagtggcggaacggcagacgcactggtctcaggtaccagcgacttc

ggtcatgagggttcgaatccctcctttctgtacca

1-11tRNA-Leu(caa)[50421,50505]

gccggtctggcggaatggcagacgcagtgggttcaagtcaccgcctt

cggggtcccggttcgagccggggaccggcacca

1-12tRNA-Leu(gag)[50511,50599]

tgcgaagtggcggaacttggtagacgcaccggcatgagaggccggcgcc

cttcggggcgtgaggttcgagtccttcttcgcgacca

1-13tRNA-Ala(tgc)[50683,50753]

ggggtatgcgcagggcgaggcatccttgcaaggaagtcggggtgggtt

cgagtcacatactccacca

1-14tRNA-Ser(cga)[50758,50845]  
ggtaggttggctgagaggccgaaggcgcccgttgcgaaacgggaggacc  
gcaaggttccgtgggttcgaatcccacactacctcca  
1-15tRNA-Ser(gga)[50850,50937]  
ggatgtatggctgagaggccgaaggcgcccgttggaaagcgggtgaacc  
gcaaggttccgtaggttcgaatcctactgcatccgccca  
1-16tRNA-Phe(gaa)[51631,51706]  
ggactcgtagctcagcaggtagagcgccggcttgaaacccggaggtcgg  
aggttcgattcctcccgttccacca  
1-17tRNA-Val(gac)[51712,51787]  
gcccgatgagccagatgggaaggcgcccggtgacatggcgggattgaga  
aggttcgattccttcacagcacca  
1-18tRNA-Ile(gat)[51790,51865]  
gcaagttagctcagtcggttagagcagcggaccgataatccgcctgtccc  
tggtcgagtcaggtcattgcacca  
1-19tRNA-Ile(gat)[51873,51947]  
tgtggcatagctcagggtagagcgcgcttgataagcgtgaggtcggg  
ggttcgaagccctctgccactacca  
1-20tRNA-Val(cac)[51981,52056]  
tggcgtttagcatagtgggagtcaggggtgtcacatacctcgatcgaac  
tggtcgattccagtaacgccaacca  
1-21tRNA-Gln(ctg)[52062,52135]  
tgagggttcgtctaacggttaggacggctgggtctggtccagctaattag  
gttcgagtcctagcccctcatcca  
1-22tRNA-Gln(ttg)[52143,52216]  
tctcgggtggtctaattggaagacatctggttttggtccagaggattggg  
gttcgattccttggccgagaacca  
1-23tRNA-Ile(aat)[52232,52306]  
tccagtaatgcacaaggtgtgcagcggcactgttaatgcctgtgagccc  
gggttcgattccggggtctggagcca  
1-24tRNA-Gly(tcc)[52509,52586]  
gcgcgggtagctcaatggacccagagcagccgtctccacacggaaggtt  
gggggttcgaatccctccccgtgcgcca  
1-26tRNA-Cys(gca)c[101969,102057]  
gcttcggtggactgagaggttaggcgcgggattgcaaatctctgctggtg  
ggaacacctatgagggttcgagtcctcccgaagctcca  
1-27tRNA-Gly(tcc)c[102637,102710]  
tttcgaatagcacagtggtagtgcaacagccgtcctagctgtcggtcgc  
gggttcaatccccgcttcgatgaa  
1-29tRNA-Met(cat)[103783,103861]  
cgcggggtagaggagtcgggtgtcctcgtctggtcataaccaggagat  
cgtgggttcaatcccactcccgtccca  
1-30tRNA-Met(cat)[104228,104312]  
ggtacgggtggctcgacaggtgaaggcatcggcctcataagccgagggttcg

tcccaatcctggttcaaatccaggtcgtacctcca  
 >JX100814.1 Caulobacter phage CcrRogue, complete genome  
 1-1tRNA-Trp(cca)[48466,48541]  
 gtcggtctagctcatgggtagagcggcggctccaaaaccgcgcgtggc  
 aggttcgagtcctcgtccggcgcca  
 1-2tRNA-Gly(gcc)[48546,48620]  
 gcatccgtagtatataggtgattacagcgcgttgccaacgcgtagagtcg  
 ggttcgagtcgccgacggatgctcca  
 1-3tRNA-Gly(tcc)[48625,48698]  
 gcgggtatagctcaaaggagagttgctgcctccaagcagaagatgcga  
 gttcgagcctcgctatccgctcca  
 1-4tRNA-Glu(ttc)[49141,49218]  
 ggcccggctcgtctagcggttgcaggattcctgactttcaatcaggagag  
 cggagttcgagtcctccgtcgggcttcca  
 1-5tRNA-Asp(gtc)[49244,49318]  
 ggtgccgtcgtatatagggttattatcaccggctgtctcccggtggaaacg  
 ggttcgagtcgccgtcggcatcgcca  
 1-6tRNA-Pro(cgg)[49997,50072]  
 cggggtgtagctcagtcggtagagcgtcgggtcgggaccgagaggccgt  
 gggttcgagtcgccgccaccagacca  
 1-7tRNA-Pro(ggg)[50080,50156]  
 cgggatgtagctcagtttgggagagcgcgcggctgggggccgcgaggccg  
 caggttcaagtctgccaccccgacca  
 1-8tRNA-Thr(ggt)[50159,50234]  
 aacgctgttcgcgctggcttcgcgccacccttggtatggggcggtaga  
 aggttcaattccttcagcagacca  
 1-9tRNA-Lys(ctt)[50365,50451]  
 ggatgtgtcacctcagtggcgagaggaacgggctcttaatccgtcagcgc  
 aagctcaccgtgggttcgagtcaccacatcctcca  
 1-10tRNA-Lys(ttt)[50457,50546]  
 gcacaagtacccgagcggcgaaggcgctcgacttttaatcgactaggcg  
 tccagcctcaccgagggttcgagtcctccttctgtctcca  
 1-11tRNA-Leu(cag)[50550,50636]  
 gcgaatgtggcggaactggtagacgcgccgcctcaggtgccggtgccct  
 tcggggcgtgtgggttcgagtcacccttctgtacca  
 1-12tRNA-Leu(caa)[50644,50731]  
 gccttgctggcggaagtggtagacgcactgttctcaaaaagcaggccggg  
 cgaccgggctctgggttcgatcccaggtgaggcacca  
 1-13tRNA-Leu(gag)[50739,50826]  
 tgcgaagtggcggaactggtagacgcaccggcatgagaggccggcgccc  
 ttcggggcgtgagggttcgagtccttcttcgcgacca  
 1-14tRNA-His(gtg)[50907,50977]  
 gctgatcgccgctgggcggggagcgggttgtgtcccgcctaggcacggtt  
 cgatcccgtgggtcagttacca



1-15tRNA-Ala(tgc)[50983,51053]  
ggggtatgcgcagggcgcagggcatcctttgcaaggaagtcggggtgggtt  
cgagtcacatactccacca  
1-16tRNA-Phe(gaa)[51958,52033]  
ggactcgtagctcagcaggtagagcggcgttgaaccccgaggtcgg  
aggttcgaltcctcccgtttccacca  
1-17tRNA-Val(gac)[52039,52114]  
gcccgatgagccagatgggaaggcaccgcttgacatggcggcattgaga  
aggttcgattccttcacaggcacca  
1-18tRNA-Ile(gat)[52120,52195]  
gcaagtgtagctcagttggtagagcagcggaccgataatccgcccgtccc  
tggtcgagtcaggcatttcacca  
1-19tRNA-Ile(gat)[52203,52278]  
tgtggcatagctcaggggtcagagcgcgcgttgataagcgtgaggtcgg  
tggtcgagaccacctgtcactacca  
1-20tRNA-Val(cac)[52313,52386]  
aggcgattagctcaatggtagagcaggggtgccacatacctcggctcgtag  
gttcgattcctacatcggccacca  
1-21tRNA-Gln(ctg)[52393,52466]  
tgagggttcgtctaacggtaggacgcctgggtctggtccaggtaatctag  
gttcgagtcctagcccctcatcca  
1-22tRNA-Gln(ttg)[52473,52546]  
tctcgggtcgtctaattgtaagacatctggtttggtccagaggattggg  
gttcgattccttggccgagagcca  
1-23tRNA-Ile(aat)[52564,52638]  
tcagtcgaatgcacaaggtgtgcagcggcactgttaatgcctgtgagccc  
ggttcgattccggggtctggagcca  
1-24tRNA-Arg(tct)[52840,52917]  
gcgcgggtagctcaacggaaccagagcagccgtcttctacacggtgggtt  
gggggttcgagtcctccccgtgcgcca  
1-25tRNA-Cys(gca)c[102172,102260]  
gctacgggtggtccgagaggttaggcgcgggactgcaaattctctgctggtg  
gcgacacctatgagggttcgagtcctcccgtagctcca  
1-26tRNA-Met(cat)[103047,103125]  
cgcggggtagaggagtcgggtgtcctcgtctggctcataaccagaagat  
caggggttcaaatcccctcccgtccca  
1-27tRNA-Met(cat)[103384,103470]  
ggtacgggtggctcgacaggtaaggcatcggcctcataagccgagggacta  
gtccccgatcctggttcaaatccaggtcgtacctcca  
1-28tRNA-Ala(tgc)[149330,149403]  
tccgctgctcgcgggtagccgccgtcgtcttcgggatggcgccccgg  
acgatcctgtcggcgtgtcggga

>JQ340389.1 *Vibrio* phage pVp-1, complete genome

1-1tRNA-Met(cat)[37974,38050]

tgcgagaatggagaaatggcgtcttgcgagtttcataagctcgataacgt  
ggggttcgaatccccatctcgcaccca  
1-2tRNA-Lys(ttt)[38057,38133]  
gcgcgtgtagctcagttggtagagcatctgacttttaatcaggtggtcg  
gtgggtcagtcacactacgcgacca  
1-3tRNA-Glu(ttc)[38135,38210]  
acaccggaagacagatggattggctgcacccttcaaggaggagtttgc  
gggttcgagtcgccgtccggtgtacca  
1-4tRNA-Ala(tgc)[38217,38292]  
ggggaattagctcagttgggagagcagggtcttgaaggctcaggtcat  
cgggttcgagtcgatattctccacca  
1-5tRNA-Met(cat)[38381,38457]  
agaggcttggctgagttggttatagcgactccttcagcggagtaagacg  
ggggttcgagtcacctcagcctctacca  
1-6tRNA-Tyr(gta)[38550,38639]  
ggttgaatgcgacgaattggttaagtcagcggactgtaaatccgtagccac  
cgagaggggcatctaggttaagtcctagttcaaccacca  
1-7tRNA-Asn(gtt)[38646,38721]  
ggggaattaactcagcggtcagagtggtgcctgttaagcagctggctcgt  
aggttcaaatcctacattccccgcca  
1-8tRNA-Asp(gtc)[38728,38805]  
gcggctgtgtcgagatggttaggcaacctcctgtcacggaggagtagc  
gtgggttcaagtcctcagtcgcgcca  
1-9tRNA-Pro(tgg)[38812,38890]  
cggggtgtaatgtcagtcgttcagcggctcgttggatgcgagaggt  
cgtaggttcgaatcctacctccccgacca  
1-10tRNA-Leu(tag)[39227,39313]  
gcaggagtggcgtaattggttagccgcgctggatttagattccagtggtct  
ttgtaccgtgaggggtcaagtcctcctcctgtacca  
1-11tRNA-Gly(tcc)[39882,39968]  
gcgtactgaagactgagcggtcggtcactagcctccaagctagcgcct  
taatcgggtaggggttcgactccctctgtacgtcca  
1-12tRNA-Thr(tgt)[40148,40223]  
gcttccttagctcagttgggagagcagctcacttgaatgagcaggtcgt  
ccgttcgaatcggacaggagcacca  
1-13tRNA-Gln(ttg)[40431,40506]  
aggggattagctcagttggtagagcatcggaattgactccgagggtcgc  
aggttcaagtcctgcacccccgcca  
1-14tRNA-Val(tac)[40772,40848]  
gcaggattagctcagtagagtagagcacttccttacaaggaaggggtcgt  
taggttcaagtcctacatcctgtacca  
1-15tRNA-Ile(gat)[41719,41794]  
acttcgtagctcagttggtagagcaaacgaccgataatcgtaggtcac  
tggttcgagtcagtcgggagtacca

1-16tRNA-Met(cat)[41796,41871]  
 gtcccttagctcagtggttagagcgtcctgctcataacaggagggtcac  
 tggttcaagtcagtaaggggcacca  
 1-17tRNA-Phe(gaa)[42188,42263]  
 gcgggaatagctcagtaggtagagcacttggtgaagaccttggtgtcgc  
 tggttcaattccagcttcccgacca  
 1-18tRNA-Arg(acg)[42272,42349]  
 gcgcgattagctcagatggatagaagcagcacccctacgaaggtaaggtc  
 tggggttcgagtcctgatcgcgcgcca  
 1-19tRNA-Ser(gct)[42354,42443]  
 ggagagatgcccgaactggttaaggagctccctgctaaggagtcggctg  
 ctaacgtggtctgtgagttcaaatctcactctctccgcca  
 1-20tRNA-His(gtg)[44928,45004]  
 gtgacgttggctgatgtggaatggctccgggtgtgattccggaagatg  
 cgggttcgaaccccgtagtcacccca  
 1-21tRNA-Arg(tct)[45236,45312]  
 gcgcccttagctcagctggatagagcacgtcccttctaaggatgtggtcg  
 taggttcgaatcctacaggcggtgcca  
 1-22tRNA-Leu(taa)[45497,45583]  
 gtggcggtggtggaattgtaatacacgtgggacttaaaatcccatgcc  
 tagaggattgagagttcagttctctccgcagtagcca

>JQ182736.1 Enterobacteria phage vB\_EcoS\_Rogue1, complete genome

1-1tRNA-Arg(cct)[3387,3462]  
 gttctgctggcgtaacaggataacgcagagacctcctaagtctcagttgc  
 tggttcgagtcagtcggaacacca

>JX100811.1 Caulobacter phage CcrKarma, complete genome

1-1tRNA-Trp(cca)[47887,47962]  
 gcgggtctagctcatgggtagagcggcggtcctccaaaaccgcgcgtggc  
 aggttcgagtcctgcgaccggcgcca  
 1-2tRNA-Gly(gcc)[47968,48042]  
 gcgtccatcgtatatgggttattgcttcgctgtccaacgcgacgaaccg  
 ggttcgagtcgccgtggacgctcca  
 1-3tRNA-Gly(tcc)[48049,48122]  
 gcggatatagctcaaaggagagctactgcctccaagcagaagatgcgg  
 gttcgagccccgctatccgctcca  
 1-4tRNA-Glu(ttc)[48279,48356]  
 ggccccgtcgtctagcggttgcaggattcgtgactttcaatcacgagag  
 cggagttcgagtcctcggtcggcctcca  
 1-5tRNA-Asp(gtc)[48380,48454]  
 ggtgcgttcgtatatcggtaatactccgattgtcgatccggaagagg  
 ggttcgattcccctacgcaccgcca  
 1-6tRNA-Pro(cgg)[49317,49392]  
 cggggtgtagctcagtcggtagagcgctcgggtcgggaccgagaggccgt  
 ggggttcgagtcgccccaccagacca

1-7tRNA-Pro(ggg)[49400,49474]  
cgggatgtagctcagcggtagagcgcgcgctgggggcccgcgagggccgca  
ggttcgagacctgccaccccgacca  
1-8tRNA-Thr(ggt)[49480,49552]  
gctgctgcgcctggatcggcgccggccccttggtatggggaagtagaagg  
ttcaattccttcagcagcacca  
1-9tRNA-Lys(ctt)[49663,49749]  
ggatgtgtcacctcagtggcgagaggaccgggctcttaatccggcagcga  
aagctcatcgtgggttcgagtcaccacatcctcca  
1-10tRNA-Lys(ttt)[49755,49844]  
gcacgagtgacccgagcggcgaaggcgctcgacttttaatcgactgggcg  
tcacgctcaccgagggtcgagtcctcctcgtgctcca  
1-11tRNA-Leu(cag)[49851,49936]  
gcgaaagtggcggaacaaggtagacgcaccggtctcaggtaccggcggct  
tcggtcatgagggtcgagtcctcctttcgtacca  
1-12tRNA-Leu(caa)[49944,50028]  
gccggtctggcggaatggcagacgcagtggttcaagtcccaccgcctt  
cgggcgtcccgttcgatgccggggaccggcacca  
1-13tRNA-Leu(gag)[50035,50122]  
tgcaagtggcggaatttggtagacgcaccggcatgagaggccggcgccc  
ttcggggcgtaggggttcgagtccttcttcgcgacca  
1-14tRNA-Ala(tgc)[50213,50283]  
ggggtatgcgcagggcgagggcatccttgcaaggaagtcggggtgggtt  
cgagtcacatactcacca  
1-15tRNA-Ser(cga)[50288,50375]  
ggtaggttggctgagaggccgaaggcgcccgttcgaaaacgggagaacc  
gcaaggttcggtgggttcgaatcccacacctaactcca  
1-16tRNA-Ser(gga)[50380,50467]  
ggatgtatggctgagaggccgaaggcgcccgttggaagcgggtgaacc  
gcaaggttcgtaggttcgaatcctactgcatccgcca  
1-17tRNA-Phe(gaa)[51757,51832]  
ggactcgtagctcagcaggtagagcgccggttgaaaccccgaggtcgg  
aggttcgactcctccggttcacca  
1-18tRNA-Val(gac)[51838,51913]  
gcccgatgagccagatgggaaggcgccgctgacatggcgggattgaga  
aggttcgattccttcacagcacca  
1-19tRNA-Ile(gat)[51916,51991]  
gcaagtgtagctcagttggtagacgagcgaccgataatccgccgctccc  
tggttcgagtcaggcatttcacca  
1-20tRNA-Ile(gat)[51999,52073]  
tgtggcatagctcaggggtagagcgcgcttgataagcgtgaggtcggg  
gggtcgaagccctctgccactacca  
1-21tRNA-Val(cac)[52107,52182]  
tggcgtttagcatagtgggagtcaggggtgtcacatacctcgatcgaac

tggttcgattccagtaacgccaacca  
 1-22tRNA-Gln(ctg)[52188,52261]  
 tgagggttcgtctaacggtaggacggctgggtctggccagctaattctag  
 gttcgagtcctagccccctcatcca  
 1-23tRNA-Gln(ttg)[52269,52342]  
 tctcgggtggtctaattggaagacatctggtttgggtccagaggattggg  
 gttcgattccttgccgagaacca  
 1-24tRNA-Ile(aat)[52358,52432]  
 tccagtcattgcacaagggtgtgcagcggcactgttaatgcctgtgagccc  
 ggttcgattccggggtctggagcca  
 1-25tRNA-Arg(tct)[52635,52712]  
 gcgcgggtagctcaatggaccagagcagccgtcttctacacggtgggtt  
 gggggttcgaatccctccccgtgcgcca  
 1-26tRNA-Cys(gca)c[102537,102625]  
 gcttcggtggactgagaggttaggcgcgggattgcaaatctctgctggtg  
 ggaacacctatgagggttcgagtcctccccgaagctcca  
 1-27tRNA-Lys(ctt)c[103205,103278]  
 tttcggaatagcacagtggtagtgcaacagcctctaagctgtcggtcgc  
 gggttcaatccccgcttcgatgaa  
 1-29tRNA-Met(cat)[104351,104429]  
 cgcggggtagaggagtcgggtgtcctcgtctggctcataaccaggagat  
 cgtgggttcaaatcccactcccgtccca  
 1-30tRNA-Met(cat)[104796,104880]  
 ggtacgggtggctcgacaggtgaagcatcggcctcataagccgagggttcg  
 tcccaatcctggttcaaatccaggtcgtacctcca

>JQ086372.1 Enterobacteria phage HK446, complete genome

1-tRNA-Asn(gtt)[35097,35171]  
 gggtcagtcgtataaaggtcattacggaaggctgtaaccttcttatcgt  
 ggttcgagtcacgctgtcccgcca  
 1-2tRNA-Thr(tgt)[35177,35252]  
 gctggttagtccaatggtagagcagtcgccttgaagcgaatgggtag  
 cggttcaagtccgttaaccagcacca

>JQ182727.1 Enterobacteria phage mEpX1, complete genome

1-tRNA-Ala(cgc)c[30896,30978]  
 ataatgttggcgaggattcagacgccgtatttcgccaatatgaatacc  
 gttattttctcagtcagggccggccatttc

>HQ141411.1 Lactobacillus phage Sha1, complete genome

1-2tRNA-Lys(ttt)c[32732,32820]  
 tgcgagcgtagttcaacggtagaacgtactcctttgagttgctgactag  
 atactatgcagatgcaggttcgactcctaccgctcgcgt  
 1-3tRNA-Trp(cca)c[33058,33150]  
 tgcgagcgtagttcaacggtagaacaattccaagtcttgaagcccatt  
 cttcttgactactatgcaggttcgactcctgccgctcgcgt

>JQ062992.1 Bacillus phage phIS3501, complete genome

1-tRNA-Met(cat)c[1571,1644]  
 ggaccttagctcagttggtcagagcagacggctcataaccgtccggtca  
 taggttcaaatacctataaggtcca  
 >HE775250.1 Salmonella phage vB\_SenS-Ent1 complete genome  
 1-tRNA-Ser(tga)c[5658,5736]  
 aactggaataattgaggcaaaattaagggcccttgaagggcctttcgt  
 tactcaggttctgagaccttagccgctt  
 >JX316028.1 Erwinia phage phiEaH2, complete genome  
 1-tRNA-Trp(cca)[167025,167100]  
 aggggcatagctcagctggcagagcaccggctcctccaaaaccgggtgtcca  
 aggttcgaatccttgtgccctgtcca  
 1-2tRNA-Cys(gca)[167459,167534]  
 ggggcgatggctcgagcggtaaggcgagtgattgcaaatcacttttaggc  
 cggttcaaataccggctcgtccctcca  
 1-3tRNA-Gly(ccc)[169219,169294]  
 gcgagtatactcagctggtagagcttctggttcccaaccagacggctcgt  
 gatttcgaatctcattgctcgtcca  
 1-4tRNA-Tyr(gta)[169404,169489]  
 ggcgcggtactcaagtggtaacgagagcagactgtaaatctgttcctt  
 cgggcttcgtaggttcaaatacctccctgccacca  
 1-5tRNA-Glu(ttc)[169496,169570]  
 gttcctgtcgtctagtggtaaggacacctggtttcaaccaggcaaccgg  
 agttcaattctccgaggaacgcca  
 1-6tRNA-Asp(gtc)[169727,169804]  
 aggattgtagctcagttggctagagtgccgcctgtcacggcgaggtc  
 gcgggttcgagccccgtcagtcctgtcca  
 1-7tRNA-Ile(gat)[169814,169889]  
 tgcgtcttagctcagttggtagagcgacccctgataagggtgaggtcac  
 tggttcaagtccagtagatgcaacca  
 1-8tRNA-Met(cat)[169896,169971]  
 ggttctgtagcttagctggtagagcagccactcataatggcgcggtcgt  
 tggttcgaatccagccagaaccacca  
 1-9tRNA-His(gtg)[169980,170056]  
 gtgtatgtagttcagctggtagaatactggcttgacgtcagtggtcg  
 agagttcgagtctctccatacacccca  
 1-10tRNA-Ser(gct)[170062,170151]  
 ggagaattgtccgagaggcttaaagagctcccctgctaaggagtggtgg  
 cgaaagctgcccgtgtgtcgaatcacatttccgcca  
 1-11tRNA-Met(cat)[170349,170424]  
 gagcgaatgctgttaagatggtaacacccgactcataatcgatattcgc  
 aggttcgattcctgtcatcgttcgcc  
 1-12tRNA-Asn(gtt)[170432,170508]  
 ggttccatagctcagttggtagagcggctgcctgttaagcagtaggtcc  
 ctggttcgagtcaggtggtaccgcca

>JX100812.1 Caulobacter phage CcrMagnet, complete genome

1-1tRNA-Trp(cca)[47077,47152]

gtcggctagctcatgggtagagcggcggctctcaaaaccgcgcgtggc

aggttcgagtcctgcgaccggcgcca

1-2tRNA-Gly(gcc)[47158,47232]

gcgtccatcgatatagggttattgcttcgcgttgccaacgcgacgaaccg

ggttcgagtcgccgggtggacgctcca

1-3tRNA-Gly(tcc)[47239,47312]

gcggatatagctcaaggagagctactgccttccaagcagaagatgcgg

gttcgagccccgctatccgctcca

1-4tRNA-Glu(ttc)[47468,47545]

ggccccgtcgtctagcggtttcagagattcgtgactttcaatcacgagag

cggagttcagtcctccgtcgggcctcca

1-5tRNA-Asp(gtc)[47569,47643]

ggtgcgttcgtatatcggtcaatactccgattgtcgatccggcaagagg

ggttcgattcccctacgcaccgcca

1-6tRNA-Pro(cgg)[48504,48579]

cgggggttagctcagtcggtagagcgtcgggtcgggaccgagaggccgt

gggttcgagtcgcccccaccagacca

1-7tRNA-Pro(ggg)[48587,48661]

cgggatgtagctcagcggtagagcgcgcggctgggggcccgcgaggccgca

ggttcgagacctgccaccccgacca

1-8tRNA-Lys(ctt)[48850,48936]

ggatgtgtcacctcagtggcgagaggaccgggctcttaatccggcagcga

aagctcatcgtgggttcgagtcaccacacatcctcca

1-9tRNA-Lys(ttt)[48942,49031]

gcacgagtgacccgagcggcgaaggcgctcgacttttaatcgactgggcg

tccagcctcaccgaggttcgagtcctcctctgtgctcca

1-10tRNA-Leu(cag)[49038,49123]

gcgaaagtggcggaacaaggtagacgcaccggctcaggtaccggcggct

tcggtcatgaggttcgagtcctcctcttcgtacca

1-11tRNA-Leu(caa)[49131,49215]

gccggctcggcggaatggcagacgcagtggttcaagtcaccaccgctt

cgggcgtcccgggttcgatgccggggaccggcacca

1-12tRNA-Leu(gag)[49222,49309]

tgcgaagtggcggaatttggtagacgcaccggcatgagaggccgcgccc

ttcggggcgtgaggttcgagtccttcttcgacacca

1-13tRNA-Ala(tgc)[49400,49470]

ggggatgcgcagggcgaggcatccttgcagggaagtcggggtgggtt

cgagtcacacatactccacca

1-14tRNA-Ser(cga)[49475,49562]

ggtaggttggtcagaggcctaaggcggccgttcgaaaacgggagaacc

gcaaggttcggtgggttcgaatccacacacctcca

1-15tRNA-Ser(gga)[49567,49654]

ggatgtatggctgagaggccgaaggcgcccgcttgaaagcgggtgaacc  
gcaaggtccgtaggttcgaatcctactgcatccgcca  
1-16tRNA-Phe(gaa)[50349,50424]  
ggactcgtagctcagcaggtagagcgccggcttgaaacccggaggtcgg  
aggttcgactcctcccggttccacca  
1-17tRNA-Val(gac)[50430,50505]  
gcccgatgagccagatgggaaggcgcccgctgacatggcgggattgaga  
aggttcgattccttcacagcacca  
1-18tRNA-Ile(gat)[50508,50583]  
gcaagtgtagctcagttggtagagcagcggaccgataatccgccgctccc  
tggttcgagtcaggcatttcacca  
1-19tRNA-Ile(gat)[50591,50665]  
tgtggcatagctcagggtagagcgcgcttgataagcgtgaggtcggg  
ggttcgaagccctctgccactacca  
1-20tRNA-Val(cac)[50699,50774]  
tggcggttagcatagtgaggagtcaggggtgtcacatacctcgatcgaac  
tggttcgattccagtaacgccaacca  
1-21tRNA-Gln(ctg)[50780,50853]  
tgagggttcgtctaattgtaggacggctgggtctggtccagctaattag  
gttcgagtcctagcccctcatcca  
1-22tRNA-Gln(ttg)[50861,50934]  
tctcgggtggtctaattgtaagacatctggtttggtccagaggattggg  
gttcgattccttgcccgagaacca  
1-23tRNA-Ile(aat)[50950,51024]  
tccagtcattgcacaaggtgtgcagcggcactgttaatgcctgtgagccc  
ggttcgattccggggtctggagcca  
1-24tRNA-Arg(tct)[51227,51304]  
gcgcggttagctcaatggacccagagcagccgtcttctacacggtgggtt  
gggggttcgagtcctccccgcgcgcca  
1-25tRNA-Cys(gca)c[100693,100781]  
gcttcggtggactgagaggttaggcgcgggattgcaatctctgctggtg  
ggaacacctatgagggttcgagtcctccccgaagctcca  
1-26tRNA-Lys(ctt)c[101361,101434]  
tttgcgaatagcacagtggtagtgcaacagcctttaagctgtcggtcgc  
gggttcaatccccgcttcgalgaa  
1-28tRNA-Met(cat)[102508,102586]  
cgcgggtagaggagtcgggtgtcctcgtctggctcataaccaggagat  
cgtgggttcaaatccactcccgtccca  
1-29tRNA-Met(cat)[102996,103080]  
ggtaggtggctcgacaggttaaggcatggcctcataagccgagggttcg  
tcccaatcctggttcaaatccaggtcgtacctcca  
>HE956708.2 Yersinia phage phiR201 complete genome  
1-1tRNA-Met(cat)c[28563,28638]  
agttagttggcagagcgggttatgcacctccctatacggagcgactacag



tggttcaatccactactaactacca  
1-2tRNA-Ile(gat)c[28645,28718]  
gcccgattagttcaatggtagaacagagagccgataactctcagacctag  
gatcgtaacctagattgggtacca  
1-3tRNA-Thr(tgt)c[29529,29603]  
gctcctaaagcattgctggcgatgcagttgccttgtaagcatctgaaccg  
ggttcgattcctggaggagcacca  
1-4tRNA-Gly(tcc)c[30008,30082]  
gcgtgattagttcagtggttagaataactggctccaaccagtagacacg  
agttcgactctcgatcccccacca  
1-5tRNA-Gln(ttg)c[30089,30164]  
tggagagtagtgaacggttagcacaacggccttgactccgtaaatggt  
aggttcgattcctccttctccagcca  
1-6tRNA-Gln(ctg)c[30171,30246]  
tgggatgtagatcaattggcagatcgtcggccttgactccgaaggttcc  
acgttcgatccgtggcatcccagcca  
1-7tRNA-Arg(acg)c[30481,30555]  
gcgtccttattcaacggaagaatgtaaagctacgaactttacgatcgg  
ggttcgattccctgaggatgcacca  
1-8tRNA-His(gtg)c[30562,30638]  
gtggctatatcataattggttaatgatcctgattgtgaatcaggcctatg  
tggttcgaattccactagccaccca  
1-9tRNA-Leu(tag)c[31489,31565]  
gcgtgattgatggaattggcatacataccgtccttagaagtcgggtttg  
agggttcgaatccctgtcacgcacca  
1-10tRNA-Ala(tgc)c[31571,31649]  
ggggaatgggtctgcatggagtggacacctgcttgaccaggagacatca  
gaacggttcgattccgttattctccacca  
1-11tRNA-Val(tac)c[32384,32457]  
gctcggtagtttaattgggagaacccgtcttacacggcggttgcgata  
gttcgattctatcaccgagtacca  
1-12tRNA-Lys(ttt)c[32462,32539]  
ggattgctagctcaactggataagagtagcggaccttaatccgtcagtt  
ctgggttcgaatcccaggcaatccacca  
1-13tRNA-Met(cat)c[33179,33256]  
tgcgggtagatctctggtagatcgctagtctcataagctagaaaagag  
gtaggttcgattcctgcacccgcttcca  
1-14tRNA-Pro(tgg)c[33263,33340]  
ctccgtgtagctcagtttggccagagcgttccgttggggcggttagggtc  
tggggttcaatcctcccacggagacca  
1-15tRNA-Lys(ctt)c[33686,33762]  
acatccatagctcaataggttagagctaccgcctttaagcggagggttc  
taggttcaagtcctagtggatgtacca  
1-16tRNA-Asp(gtc)c[33911,33987]

gcgatcggggctggcttggtaatgggtactcccctgtcacgggagagaatg  
tgggttcgaatcccatcggtcgcgcca  
1-17tRNA-Asn(gtt)c[34433,34508]  
gagagaagcagtaagtggatagggcgtcgcctgtaagcgaatgacagt  
gagttcgaatctcacctctcccgcca  
1-18tRNA-Cys(gca)c[34516,34590]  
gcatccttgtccgagtggttagtgacggctgcaaaatcgtaagtt  
ggttcaattccaacagggtgctcca  
1-19tRNA-Trp(cca)c[35423,35499]  
attctagagtggttagtgacagcatgtcggctcctccaaaccgtacggtc  
taggttcgagtcctagtaggtttgcca  
1-20tRNA-Glu(ttc)c[35508,35584]  
gtcctgtagacaaactggtaaagtactaccctttcaagtaggatttg  
cgggttcgatccccgcacaggacgcca  
1-21tRNA-Tyr(gta)c[35592,35682]  
gttgattagtagtagaggttagcgaagcagactgtaaatctgccgact  
cgggaagggtctcgggtggttcgactccatcatccaacacca  
1-22tRNA-Leu(taa)c[36601,36686]  
ggatctgtggtggaattggcaatacacaccatgcttaaacgtggcgctt  
aaatgattgaggttcgagccccctccagatccacca  
1-23tRNA-Met(cat)c[37254,37331]  
ggttctcaagctcatttggtagagccgtcgcctcataagcgaaggttag  
gtaggttcgaatcctccgggagccacca  
1-24tRNA-Ser(gct)c[37337,37431]  
ggaagattaaccctaattggtaaggagcatcttgtaagttgccagtag  
ctgtggaacacggtgtatcgggtcaagtcggatatcttctcca  
1-25tRNA-Arg(tct)c[40505,40581]  
gtcctcgttggccaaattggataaggcaagatcgttctaagttcttgatta  
gggttcgaatcccttacggagtacca  
1-26tRNA-Ser(cga)c[41640,41713]  
ctgacattagcttaatatggtagagcgtctccgggcgaaccgggggaaat  
gcaggttcgagccctgaggtcaga

>JF974287.1 *Vibrio* phage pYD21-A genomic sequence

1-tRNA-Gly(tcc)[10451,10526]  
gcgacattagctcaggtggtagagcagaagtttccaaacttaatgcat  
cgggttcgaatccgatatgtcgtcca

>HQ633071.1 *Synechococcus* phage S-SKS1 genomic sequence

1-tRNA-Gly(tcc)c[52996,53066]  
gcggaattagtttagaggcaaaactaaagtttccaaccttcgtcacca  
gttcgattctggtattccgct  
1-2tRNA-Lys(ttt)c[53142,53215]  
gggtttataactcagttggttagagtatcgggcttttaacctgcaagtcgt  
cagttcgagcctgactaaaccac  
1-3tRNA-Thr(tgt)c[53239,53310]

gccttttagctcagtggttagagcaggcctttgtaaagctcaggtcgca  
agttcaaattctgtcgaaggct  
1-4tRNA-Ser(gct)c[53313,53402]  
cggaggattggctgagtggtcgaaagcaacagtttgctaaattgtcgaag  
gtgtaaattctccgttggttcgaatccaacatcctccgtc  
1-5tRNA-Ile(gat)c[53406,53481]  
tgcccgaatagctcagatggtagagcacaccgctgataacggtgaggtc  
tctggttcgagtcggattcgggcat  
1-6tRNA-Ser(tga)c[53484,53569]  
ggagaggtggtcgagtggttatggctctggtcttgaaaaccagcgaggt  
gaaagcctccgtgagttcgaatctcaccctctccgc  
1-7tRNA-Ala(tgc)c[53740,53814]  
tggggaattagctcagttggttagagcgcctgcttgcaagtaggatgtca  
acggttcgagtcggttattctccat  
1-8tRNA-Pro(tgg)c[53815,53888]  
tcggggtgtagcgaggttagcgcatcgttttgggaagcgagggtcgc  
aggttcgatccctgccaccccgat  
1-9tRNA-Asn(gtt)c[53927,53998]  
tcccctgtagctcagcggtagagtcggtgactgttaatcactttgtcgca  
agttcgaatctgccgggggag  
1-10tRNA-Arg(tct)c[54002,54077]  
gggcaagtagctcagatggacagagccacgcacttctaatacggttggtcg  
ggggttcgagtcctccttgccctgcc  
1-11tRNA-Leu(taa)c[178217,178293]  
tgcccgtagtccaattggcagtagacacgaaactaaaatttcgacag  
tatcggttcgagtcggtacacgggtat  
1-12tRNA-Met(cat)c[178433,178507]  
tgaggtttaccaatctggtgaatggaccgttctcataaaacggcgaagg  
tgggttcaattcccacaacctgcat  
1-13tRNA-Ile(tat)c[178508,178598]  
tgctcgtgagacttggtagtcaggggagcttataaactcttgcacccg  
attagtcctttgagatcgttcaatcgatccacgagtatc  
>JX899358.1 Mycobacterium phage First, complete genome  
1-1tRNA-Gln(ctg)[4425,4503]  
ttcccgactagcacaaactggtagctgcgctcggctctggaccgagaggtt  
tgaggttcgaatccttggtcgggagccca  
>KC661279.1 Mycobacterium phage Severus, complete genome  
1-1tRNA-Trp(cca)[1682,1755]  
aggcatgtagctcaattggttagagcagcggctccaaagccgccggttgc  
aggttcgagtcctgccgtgtctgc  
1-2tRNA-Gln(ctg)[1761,1833]  
tcctcgttcgtctaatacggtagacaccaggctctggacctgggggttga  
ggttcgagtccttgccgaggagc  
1-3tRNA-Asn(gtt)[1868,1941]

tgacgtgtagctcaaccggcagagcaggcggtgttaaccgcccggttgg  
 aggttcgagtcctccctcgtcagc  
 >KC172839.1 Mycobacterium phage BTCU-1, complete genome  
 1-tRNA-Trp(cca)[3883,3956]  
 aggcgcgtagctcaattggtagagcggcggtctccaaagccgctggctgc  
 aggttcgagtcctgccgcgtctgc  
 >KC182552.1 Lactococcus phage phi7, complete genome  
 1-tRNA-Trp(cca)[31441,31513]  
 tgcgagcatagataatggtaatgccacagattccaaacctgtaaacgtg  
 gggtcgattcctactgttcgtgt  
 1-2tRNA-Asp(gtc)[31571,31642]  
 taggatatagccaaattggtatgtggtaggcagatcgcaatctggtact  
 gggtcgattccagttgtcctag  
 1-3tRNA-Pro(tgg)[31699,31770]  
 caggatatagtttaatggtagcatgcgtgtttgggaacatgtagtgtt  
 gggtcgagtcagctatcctga  
 >KC748969.1 Mycobacterium phage Phaux, complete genome  
 1-tRNA-Arg(cct)[63838,63921]  
 atggcccgtagctcagtcaggtagagcagccttgccccttgccgggcttgg  
 ttcgtccccggttcaaatccgggcgggccttgcc  
 1-2tRNA-Gly(tcc)[63924,63996]  
 gcgcccgtggtcgaattggaaagactcctggcttcacccaggttatgca  
 gggtcgagtcctgtcgggcgctc  
 >KC661277.1 Mycobacterium phage Phrux, complete genome  
 1-tRNA-Arg(cct)[61916,61999]  
 atggcccgtagctcagtcaggtagagcagccttgccccttgccgggcttgg  
 ttcgtccccggttcaaatccgggcgggccttgcc  
 1-2tRNA-Gly(tcc)[62002,62074]  
 gcgcccgtggtcgaattggaaagactcctggcttcacccaggttatgca  
 gggtcgagtcctgtcgggcgctc  
 >KC787106.1 Mycobacterium phage Chy5, complete genome  
 1-tRNA-Asn(gtt)[4562,4636]  
 tgacgtgtagctcaatggcagagcatccggctgttaaccggacggttgaa  
 gggtcgagtccttctcgtcagcca  
 1-2tRNA-Trp(cca)[4677,4752]  
 gtacacgtagctcaattggtagagcagtggtctccaaagccgcccgttcc  
 aggttcgactcctggcgtgtatgcca  
 1-3tRNA-Gln(ctg)[4760,4832]  
 tccccgttcgtctaatacggttaagacgcctggctctggaccaggttaattga  
 gggtcgagtccttggcggggagc  
 1-4tRNA-Glu(ctc)[4867,4940]  
 ggtcccttgagtagcggataactcacctggccctcaccagaagatcgc  
 gggttcgaatcccgaggactac  
 1-5tRNA-Tyr(gta)[4944,5024]

cgcgagatacccaagcggcaacgggatctgactgtaaatcagacgcttcg  
 gcttcgcaggttcgagtcctgctctcgcgac  
 >KC821607.1 Cellulophaga phage phi19:1, complete genome  
 1-tRNA-Pro(tgg)[31057,31131]  
 ctaagtgcgatccattggtgtggttaccgacttgaatcgggattattg  
 taggttcgagtcctatcacttagac  
 1-tRNA-Gln(ttg)[31189,31261]  
 tgaaatatgatgtaattggcagcatgcgagactttgactctcgtcggtta  
 ggttcgagtcctaataattcaac  
 1-tRNA-His(gtg)[31268,31341]  
 gtgtttatagtataattggttaatgcgctagactgtgaatctagatactt  
 gatttcgattctcaataaacaccc  
 1-tRNA-Leu(tag)[31346,31420]  
 gcttcagtagtcgaattggcatagacaacaggcttagaccctgaaatttg  
 agagttcgagtcctcctgaagtac  
 1-tRNA-Arg(acg)[31424,31496]  
 cttttgtagtttaacggataaaacaattggctacgaactaatagataac  
 agttcgattctgtcaaaaagtc  
 >KC748971.1 Mycobacterium phage Murphy, complete genome  
 1-tRNA-Arg(cct)[62896,62979]  
 atggcccgtagctcagtcaggtagagcagccttgccccttcgggcttgg  
 ttcgtccccggttcaaatccggcgggccttgcc  
 1-tRNA-Gly(tcc)[62982,63054]  
 gcgcccgtggtcgaattggaaagactcctggcttcacccaggttatgca  
 gggttcgagtcctgtcgggcgctc  
 >KC701493.1 Mycobacterium phage CASbig, complete genome  
 1-tRNA-Trp(cca)[51136,51210]  
 tggctcttagctcaatttggttagagcagcgtctccaaaaccgcccgttg  
 caggttcgagtcctgcagagtcagc  
 >KC237729.1 Clostridium phage vB\_CpeS-CP51, complete genome  
 1-tRNA-Ser(gct)[36204,36295]  
 ggaaagtactcaagttggttaagaggcagattgctaactctgtagtag  
 gctttatgtctagcaagagttcaaatcttactttccgcca  
 >KC661281.1 Mycobacterium phage Jobu08, complete genome  
 1-tRNA-Asn(gtt)[3904,3979]  
 tgacgttagctcaatcggcagagcaccggctgttaaccggcggttga  
 aggttcgagtccttccatgtcagcca  
 1-tRNA-Trp(cca)[4020,4094]  
 aggcacgtagctcaattggtcagagcagcgtctccaaagccggcgtg  
 caggttcgagtcctgccgtgtctgc  
 1-tRNA-Leu(cag)[4129,4203]  
 ggctcggtaggcaaacaggcaaagccgctgtctcaggaacaggtgcgtg  
 ggggttcgactccctcccagctac  
 >KC182546.1 Lactococcus phage jm2, complete genome

1-tRNA-Trp(cca)[30552,30624]  
 tacgaacatagtatagtggtaagtctacagattccaaacctgtaaacgtg  
 ggttcgattcctgctgttcgtgt

>KC691255.1 Mycobacterium phage Dumbo, complete genome

1-tRNA-Arg(cct)[62229,62312]  
 atggcccgtagctcagtcaggtagagcagccttgccttgcgggcttgg  
 ttcgtcccggttcaaatacgggcgggccttgcc

1-tRNA-Gly(tcc)[62315,62387]  
 gcgcccgtggtcgaattggaaagactcctggcttccaccaggttatgca  
 ggttcgagtcctgtcgggcgctc

>KC900379.1 Mycobacterium phage PegLeg, complete genome

1-tRNA-Arg(ccg)[32354,32449]  
 ctccacgtggcgaatggcaatgtggcagaggggattccggtcccagggg  
 gcgggggatctcagacttccgcctgcgttcgactccgtcgtgtgtg

1-tRNA-Trp(cca)[54522,54593]  
 atgggcgtagctgactgggaagcaacggctcctcaagccgtgatatgcag  
 gttcgaatcctgcccccgtgc

1-tRNA-Asn(gtt)[55442,55513]  
 tggcctgtcggtaacggcaaacccagcgcctgttaaggcgtgactcctg  
 gttcgaatccaggtaggccagc

1-tRNA-Gln(ttg)[56269,56340]  
 cgggacatagctcaaatggcagagtggggcaattggtcccctggattcag  
 gttcgactcctggtggcccgc

1-tRNA-Tyr(gta)[56725,56807]  
 gcggtctctcccctattggcgaaggccctggctgtaaccagggcttt  
 cgagtgtggtggttcgaatccatcaggccgcac

1-tRNA-Gln(ctg)[56976,57048]  
 tgctctctcttaactggcaggacaccagaatctgactctggcagttga  
 gttcgaatccttggggagcaac

1-tRNA-Pro(tgg)[57052,57125]  
 ctgggtgaggtgtaagtgggtgcatggccggttggatccgggcggttcg  
 aggttcgagtcctcgcacccagac

1-tRNA-Ser(gct)[57421,57502]  
 gagtggaaacctctaggtggatggccgcgattgctaatactggggcagcg  
 taacgctgttggtatcgtgccactcctctcc

1-tRNA-Phe(gaa)[57612,57687]  
 cgggtttagctcagattggtgagagcgctcggttgaaaccgagaggcc  
 cctggttcgaatccagcatcccggc

1-tRNA-Met(cat)[58249,58324]  
 tgcggtgtagagcagttcggagtgccttggtcataaccaagaggcc  
 gtcggttcaaatccgaccaccgcaac

1-tRNA-Arg(acg)[58604,58678]  
 ccccccgcagcacggacgtgcacctcgctacgaacgagaaggctgct  
 ggttcgaatccagtcggtgggtcca

1-12tRNA-His(gtg)[58681,58753]  
 cctcttagctcaatggtgagagcgccggttgtgagaccggtgacctg  
 cggtcgattcgagcagggggac  
 1-13tRNA-Leu(cag)[59015,59089]  
 ggctcgctaggcaaactggcaaagccgctgattcagaatcaggtgcttc  
 cgagttcgactctcgggcgagctac  
 1-14tRNA-Lys(ctt)[60212,60285]  
 ggagcggttggtgaaacggctatcaccgcagctcttaacgtgcagttct  
 ggggtcgaatcccaggcgctccac  
 1-15tRNA-Gly(tcc)[60444,60520]  
 gcgtgtgtgatgttaacggctagcattcctgtcttcaaacaggctgtg  
 cgggtcgaatcccgcacgcgtcca  
 1-16tRNA-Val(tac)[60573,60644]  
 gccccgctcgtctaattgggaaggccgctgcgttacaagcagcagcggga  
 gttcgattctctcgggggtac  
 1-17tRNA-Thr(agt)[60706,60778]  
 gccggtatagctcagtggttagagcacctgtctagtaaaccaggagaccag  
 ggttcgattccctgttccggctc  
 1-18tRNA-Asp(gtc)[60894,60967]  
 cccgatgtcatctagtgaccaggatgccgccctgtcgaggcggtcacgc  
 gaggttcgaatctcgtcgtcgggac  
 1-19tRNA-Glu(ctc)[61355,61429]  
 gttcccgtaggagtaattggtatctcgcctgactctcaatcaggagattg  
 cgcgttcaagtcgctcggaatac

>KC787105.1 Mycobacterium phage Chy4, complete genome

1-1tRNA-Asn(gtt)[4220,4294]  
 tgacgtgtagctcaatggcagagcatccggctgtaaccggacggttgaa  
 ggttcgagtccttctcgtcagcca  
 1-2tRNA-Trp(cca)[4335,4410]  
 gtacacgtagctcaattggtagagcagtggtctcctcaaagccggttcc  
 aggttcgactcctggcgtgtatgcca  
 1-3tRNA-Gln(ctg)[4418,4490]  
 tccccgttcgtctaatacggaagacgcctggctctggaccaggttaattga  
 ggttcgagtccttggcggggagc  
 1-4tRNA-Glu(ctc)[4525,4598]  
 ggtcccttgagtagcggataactcacctggccctcaccagaagatcgc  
 ggggtcgaatcccgcagggactac  
 1-5tRNA-Tyr(gta)[4602,4682]  
 cgcgagatacccaagcggcaacgggatctgactgtaaatcagacgcttcg  
 gcttcgagggttcgagtcctgctcgcgac

>KC821618.1 Cellulophaga phage phi10:1, complete genome

1-1tRNA-Tyr(gta)[31599,31683]  
 ggggtggtgctcggctggaagaggcgcaggactgtaattctgtaatcc  
 actaggaatggaggttcgagtcctcctcaccac

1-2tRNA-Phe(gaa)[31767,31840]  
 ggaaatatagctcagttggtagagcgtcgattgaagatgcgagcgtcgg  
 cagttcgaatctgtctattccac

>HE962497.1 Streptococcus phage SP-QS1 complete genome  
 1-1tRNA-Trp(cca)[24820,24891]  
 gagcggtagtgtaatggttagcacacagtcctccaaaactgtagagag  
 ggttcgattcctcactgcttg

>KF306380.1 Mycobacterium phage DrDrey, complete genome  
 1-1tRNA-Arg(cct)[63869,63952]  
 atggcccgtagctcagtcaggtagagcagccttcccccttgcgggcttgg  
 ttgtccccgggtcaaatccggcgggccttgcc  
 1-2tRNA-Gly(tcc)[63955,64027]  
 gcgcccgtggtcgaattggaaagactcctggcttccaccaggttatgca  
 ggttcgagtcctgtcgggcgctc

>KF416344.1 Mycobacterium phage Adzzy, complete genome  
 1-1tRNA-Asn(gtt)[4021,4095]  
 tgacgttagctcaacggcagagcaccggctgttaaccggacggttgaa  
 ggttcgaatcctccacgtcagcca  
 1-2tRNA-Gln(ctg)[4132,4204]  
 tctctttctctaatacggaagacacctggctctggaccaggcaattga  
 ggttcgagtccttgaggagagc  
 1-3tRNA-Lys(ctt)[4239,4312]  
 ggggcagtagctcagtcggtagagctcggactcttaatccgtaggtcgc  
 aggttcgatccctgcctgccccac

>KF024731.1 Mycobacterium phage Crossroads, complete genome  
 1-1tRNA-Thr(cgt)[63172,63245]  
 gccaccttagctcagttggtagagcagcgccttcgtaacgcgcaggtcag  
 cggttcgattccgctaggtggctc  
 1-2tRNA-Pro(tgg)[63707,63780]  
 cggcccaaggtgtaatggcttgcatgagcgcttggatcgccggggttcc  
 ctgttcgactcggggtggccgac  
 1-3tRNA-Trp(cca)[63851,63924]  
 agcgaattggtgtaatcggtagcatagcggcctccaaaaccgcctggtag  
 aggttcgagtcctctattcgttgc  
 1-4tRNA-Leu(tag)[64297,64371]  
 gctccgctaggcaaaactggcaaagccgcctgatttaggttcaggtgttc  
 ggggttcgactccccggtggagcac  
 1-5tRNA-His(gtg)[64371,64443]  
 cgcgaggtagcttaagtagtaagccccgactgtgactcgggtgattcg  
 ggtgcaagtcctggcctgtcgcc  
 1-6tRNA-Tyr(gta)[64446,64528]  
 gtggcgggtgggcttgttggtggcccgctgactgtaaatcaggtgtt  
 cggcatcgggggttcgattccctctcgccacac  
 1-7tRNA-Gln(ctg)[64536,64611]



tgaccgctagcacaattaggcagttgcgccggaatctgactccggaggtt  
ccaggttcgattcctgggtggtcagc  
1-8tRNA-Gly(tcc)[64727,64801]  
gtgctagtaacctatgttggtgggtgccactcttccaaagtggaattcg  
cgcgttcgattcgcgtctagcacac  
1-9tRNA-Lys(ctt)[64836,64911]  
gcctcgttagctcagttggttagagcagccgactcttaatcggcgggtcac  
aggttcaagtccgtacgggtacca  
1-10tRNA-Ser(tga)[64913,65002]  
ggagagtaatgcagcgggggtggcccgcgaccggccttgaaagccgggta  
gccgtaatggagcttgggggtcgatccctctgctctccgc  
1-11tRNA-Cys(gca)[66093,66165]  
gccgttgtgtccgagtggttaggtgccaggctgcaaacttggttagtcgc  
gttcgattcgcggggacggctcc  
1-12tRNA-Asn(gtt)[66434,66507]  
tcctccgtagctcaattggcagagcgcgcgactgtaatcgcgtggttgg  
tggttcgagtcacccgttggagc  
1-13tRNA-Lys(ttt)[66701,66775]  
gccctatagctcagttggttagagcaggagactttaatcttcgggtcct  
aggttcgatccctagtgggggcacc

>KF024725.1 Mycobacterium phage Whirlwind, complete genome

1-1tRNA-Tyr(gta)[39380,39463]  
gtggcgaaggcaactgttggtttgtgcacctgcctgtaaagcaggcgcgt  
tcggcttcgggggtcaattccctctcgcacac  
1-2tRNA-Thr(cgt)[63038,63110]  
gccaccttagctcaggggtagagcagcgccttcgtaacgcgcagggtcaac  
ggttcgattccgttaggtggctc  
1-3tRNA-Pro(tgg)[63469,63543]  
ctggttagcgcagcttggtagcgcgcctgatttgattcagggggtcg  
gaggttcaaatccttcagccagac  
1-4tRNA-Gly(tcc)[63884,63958]  
gcgctagctacccctgttggcgggtgcctgcctccaagcaggatcacg  
cgggttcgattcctgtctagtctc  
1-5tRNA-Trp(cca)[64013,64086]  
agctcggtagctcaactggttagagcagtggtctccaaagccaccggttgc  
aggttcgactcctgtccgggttc  
1-6tRNA-Leu(tag)[64087,64161]  
ggttcgtaggcaactggcaaagcgtctgacttagaatcaggtgtttg  
ggagttcgactctccccggaactac  
1-7tRNA-His(gtg)[64162,64231]  
gctaagtagcttaatggtaaagccccgggttggtccgggcgatcacgg  
ttcaactccgtgcttaagcc  
1-8tRNA-Gln(ctg)[64513,64588]  
tgcccgctagcacaatttggcagttgcgccggctctgaaccgggaggtt

ccaggttcgactcctgggtgggcagc  
 1-9tRNA-Lys(ctt)[64717,64790]  
 gcgtcgttagctcagttggtagagcagccgactcttaacggcgggtcgg  
 gggttcaagtccctcacggcgac  
 1-10tRNA-Asn(gtt)[65920,65992]  
 tcccctgtcatttaaccggcaggatgcctcgtgttaacgaggtcgtgca  
 ggttcgatccctgctgggggagc  
 1-11tRNA-Lys(ttt)[65997,66070]  
 gccgcgttagctcagttggtagagctgctgacttttaacagtaggtccg  
 gggttcgagtcctcccgacgcggtac  
 >KF114875.1 Mycobacterium phage Redno2, complete genome  
 1-tRNA-Gly(tcc)[90864,90936]  
 gcgcttgtggtcagttggaaagactcctggctccaccaggttatgca  
 ggttcgagtcctgtcgagcgctc  
 >KF279417.1 Mycobacterium phage Quink, complete genome  
 1-tRNA-Arg(cct)[63291,63374]  
 atggcccgtagctcagtcaggtagagcagccttgccccttgcgggcttgg  
 ttcgtccccgggtcaaatccgggcgggccttgcc  
 1-2tRNA-Gly(tcc)[63377,63449]  
 gcgcccgtggtcgaattggaaagactcctggctccaccaggttatgca  
 ggttcgagtcctgtcgggcgctc  
 >KF562100.1 Mycobacterium phage HufflyPuff, complete genome  
 1-tRNA-Arg(cct)[63504,63587]  
 atggcccgtagctcagtcaggtagagcagccttgccccttgcgggcttgg  
 ttcgtccccgggtcaaatccgggcgggccttgcc  
 1-2tRNA-Gly(tcc)[63590,63662]  
 gcgcccgtggtcgaattggaaagactcctggctccaccaggttatgca  
 ggttcgagtcctgtcgggcgctc  
 >KF562099.1 Mycobacterium phage Bruin, complete genome  
 1-tRNA-Arg(cct)[61837,61920]  
 atggcccgtagctcagtcaggtagagcagccttgccccttgcgggcttgg  
 ttcgtccccgggtcaaatccgggcgggccttgcc  
 1-2tRNA-Gly(tcc)[61923,61995]  
 gcgcccgtggtcgaattggaaagactcctggctccaccaggttatgca  
 ggttcgagtcctgtcgggcgctc  
 >KC182547.1 Lactococcus phage jm3, complete genome  
 1-tRNA-Trp(cca)[27491,27563]  
 tcgcaacatagtatagtggtaatactacagactccaaacctgtaaacgtg  
 ggttcgattcctgctgttcgtgt  
 >KF024721.1 Mycobacterium phage AnnaL29, complete genome  
 1-tRNA-Trp(cca)[6178,6251]  
 gggcacgtagctcaatcggtagagcagcggtctccaaagccgcaggttcc  
 aggttcgaaccctggcgggctcgc  
 >KF024732.1 Mycobacterium phage Contagion, complete genome

1-tRNA-Arg(cct)[62199,62282]  
 atggcccgtagctcagtcaggtagagcagccttgccccttgcgggcttgg  
 ttcgtccccggttcaaatccggcgggccttgcc  
 1-2tRNA-Gly(tcc)[62285,62357]  
 gcgcccgtggtcgaattggaaagactcctggctccacccaggttatgca  
 gggtcagtcctgtcgggcgctc  
 >KF006818.1 Mycobacterium phage Wanda, complete genome  
 1-tRNA-Gly(tcc)[91369,91441]  
 gcgcttgggtcagttggaaagactcctggctccacccaggttatgca  
 gggtcagtcctgtcagcgctc  
 >KF017001.1 Mycobacterium phage LittleCherry, complete genome  
 1-tRNA-Trp(cca)[4311,4384]  
 gggtcagtagctcaactggaagagcagcggctctcaaagccgcgagttgg  
 aggttcagtcctcctggcctgc  
 >KF560330.1 Mycobacterium phage Conspiracy, complete genome  
 1-tRNA-Trp(cca)[4132,4205]  
 gggtcagtagctcaattggtagagcagcggctctcaaagccgcgagttgg  
 aggttcagtcctcctggcccgc  
 >KF562102.1 Mycobacterium phage PhatBacter, complete genome  
 1-tRNA-Arg(cct)[63278,63361]  
 atggcccgtagctcagtcaggtagagcagccttgccccttgcgggcttgg  
 ttcgtccccggttcaaatccggcgggccttgcc  
 1-2tRNA-Gly(tcc)[63364,63436]  
 gcgcccgtggtcgaattggaaagactcctggctccacccaggttatgca  
 gggtcagtcctgtcgggcgctc  
 >KF416343.1 Myobacteriophage Goku, complete genome  
 1-tRNA-Arg(cct)[62731,62814]  
 atggcccgtagctcagtcaggtagagcagccttgccccttgcgggcttgg  
 ttcgtccccggttcaaatccggcgggccttgcc  
 1-2tRNA-Gly(tcc)[62817,62889]  
 gcgcccgtggtcgaattggaaagactcctggctccacccaggttatgca  
 gggtcagtcctgtcgggcgctc  
 >KF279414.1 Mycobacterium phage Fredward, complete genome  
 1-tRNA-Lys(ctt)[4055,4128]  
 ggggcagtagctcagtcggcagagctacggactttaatccgcaggtcgc  
 aggttcgatccctgcctgccccac  
 >KF560334.1 Mycobacterium phage Zaka, complete genome  
 1-tRNA-Asn(gtt)[5402,5474]  
 tgacgtgtagctcaatggcagagcaccggctgtaaccggacggttgaa  
 gggtcagtccttccatgtcagc  
 1-2tRNA-Trp(cca)[5479,5552]  
 gcgctcctagctcaattggtagagcagcggctctcaaagccgcgagttcc  
 aggttcgaatcctggggagcgtgc  
 1-3tRNA-Gln(ctg)[5594,5666]

tccctgttcgtctaatacggtaagacaccgggctctggatccgtaatcga  
 ggttcgagtccttgatggggagc  
 >KF562101.1 Mycobacterium phage Nala, complete genome  
 1-tRNA-Arg(cct)[63248,63331]  
 atggcccgtagctcagtcaggtagagcagccttggcccttgcgggcttgg  
 ttgltccccgggtcaaatccgggcgggccttgcc  
 1-2tRNA-Gly(tcc)[63334,63406]  
 gcgcccgtggctgaattggaaagactcctggcttccaccaggttatgca  
 ggttcgagtcctgtcgggcgctc  
 >KF713486.1 Mycobacterium phage Validus, complete genome  
 1-tRNA-Trp(cca)[996,1069]  
 ggggtgtagctcaactggtagagcagcgggtctccaaagccgccggttgc  
 acgttcgactcgtgccgcgcccgc  
 >KJ156985.1 Mycobacterium phage RhynO, complete genome  
 1-tRNA-Trp(cca)[3811,3884]  
 aggcacgtagctcaattggaagagcagcgggtctccaaagccgccggttgc  
 aggttcgagccctgccgtgtctgc  
 1-2tRNA-Tyr(gta)[3919,4001]  
 cgcgtataccaagcggaacgggacctggctgtaaacaggcgcttcg  
 gcttcggagggttcgagtcctcctcacgcgacca  
 >KJ410134.1 Mycobacterium phage CRB1, complete genome  
 1-tRNA-Gln(ctg)[4415,4492]  
 ttcccggtagcacaaacggtagatgcgctcggctctggaccgagaggtt  
 gaggttcgaatccttgccgggagccca  
 >KF669650.1 Clavibacter phage CN1A, complete genome  
 1-tRNA-Met(cat)c[50108,50184]  
 tgcggagtagagcagttcggtagctgccagggtcatatcctggaggccg  
 cgggttcaaatcccgcctccgcaacca  
 1-2tRNA-Trp(cca)c[50230,50303]  
 acacctctagctcaactggtagagcagcggtcctccaaaccgtaggttct  
 gagttcaaatctcgggggtgtgc  
 >KF861510.1 Mycobacterium phage EagleEye, complete genome  
 1-tRNA-Trp(cca)[5584,5657]  
 gcacatgtagctcaattggtagagcagcgggtctccaaagccggggttcc  
 aggttcgagtcctggcgtgtgtgc  
 1-2tRNA-Tyr(gta)[5661,5741]  
 cgcgagatacccaagcggaaggatctgactgtaaatcagacgcttcg  
 gcttcgagggttcgagtcctcctcgcgac  
 >JF770475.1 Escherichia phage phiEB49, complete genome  
 1-tRNA-Val(aac)c[43830,43906]  
 ggcccgttaggttacaggataagattcccgacttaacaagtatcgatg  
 ctggttcgaatccagtcggggccacca  
 1-2tRNA-Arg(cct)c[43908,43983]  
 gttctcgtggcgtaacaggataacgcggagacctcctaagtctcagttgc

tggttcgagtcagcgcggaacacca  
 >KF493882.1 Mycobacterium phage Jovo, complete genome  
 1-tRNA-Trp(cca)[4423,4496]  
 gggtcagtagctcaactggaagagcagcggctctcaaagccgtgcgttgg  
 aggttcgagtcctccctggccgc  
 >KF560332.1 Mycobacterium phage CloudWang3, complete genome  
 1-tRNA-Asn(gtt)[5402,5474]  
 tgacgtgtagctcaatggcagagcaccggctgtaaccggacggttgaa  
 ggttcgagtcctccatgtcagc  
 1-2tRNA-Trp(cca)[5479,5552]  
 gcgctcctagctcaattggtagagcagcggctctcaaagccgcgagttcc  
 aggttcgagtcctgggagcgtgc  
 1-3tRNA-Gln(ctg)[5594,5666]  
 tcctgttcgtctaatacggaagacaccgggctctggacccggcaatcga  
 ggttcgaatccttgatggggagc  
 >KF560333.1 Mycobacterium phage Artemis2UCLA, complete genome  
 1-tRNA-Asn(gtt)[5285,5357]  
 tgacgtgtagctcaatggcagagcaccggctgtaaccggacggttgaa  
 ggttcgagtcctccatgtcagc  
 1-2tRNA-Trp(cca)[5362,5435]  
 gcgctcctagctcaattggtagagcagcggctctcaaagccgcgagttcc  
 aggttcgagtcctgggagcgtgc  
 1-3tRNA-Gln(ctg)[5477,5549]  
 tcctgttcgtctaatacggaagacaccgggctctggacccggcaatcga  
 ggttcgagtccttgatggggagc  
 >KC688701.1 Croceibacter phage P2559Y, complete genome  
 1-tRNA-Cys(gca)[26696,26783]  
 ggggtgtagcttaattggttaaagcgtgggttgcaaacattaaacat  
 gatacaaaaattgaggttcgagtcctactcactccac  
 >KF929199.1 Staphylococcus phage vB\_SepS\_SEP9, complete genome  
 1-tRNA-Pro(tgg)[5064,5137]  
 cagaatgtagttcaatttggtagaataccacattgggatgtggtggtg  
 ttggtcaaattccagccattctga  
 >KC481682.1 Bacillus phage vB\_BanS-Tsamsa, complete genome  
 1-tRNA-Arg(tct)c[148615,148690]  
 tacctcagaagcacaattggatgtgcaggtggtttctaccacaaggttg  
 aaggttcgaatcctttctggggtgc  
 1-2tRNA-Arg(acg)c[148694,148768]  
 tatctctatagttaattgattaacacgaaagcctacgaagctttaatt  
 ctggttcgaatccagataggatgt  
 1-3tRNA-Gly(tcc)c[148773,148845]  
 gtggtattggtctaggggttatgatttggtctccaacctgagacatc  
 ggttcgaatccgatataccacac  
 1-4tRNA-Ser(gct)c[148854,148938]

ggagagttgtcagagtggcttattgtgcttgggtgctaaccaagtggagg  
taaaactccaagggttcgaatcccttactctcct  
1-5tRNA-Ser(tga)c[148947,149032]  
ggaaggtcttgcatatcggtagtgctagctagcttggaaaactagtggtc  
agcaatggtctaggggttcgagtcgctaccttcct  
1-6tRNA-Thr(tgt)c[149128,149199]  
gcaggtttagttaaggggtataacaatcgccttgtaagcgataatcggg  
ggttcgattccctcaacctgca  
1-7tRNA-Ala(tgc)c[149201,149274]  
gggggattagtttagtgggaaaacaatggcttgcaagccatagtcgaag  
gttcgactcccttattcctccacca  
1-8tRNA-Pro(tgg)c[149279,149352]  
gtgggtatggggcagttggtagcctactggcttggaagctagatgtcgc  
aggttcgagtcctgctacccgcac  
1-9tRNA-Leu(tag)c[149363,149448]  
tgcaggagtgatggaattggttagacttggcagattagaatctgctgtcc  
tagtggcgtgaggggttcgagtcctccttctgtatc  
1-10tRNA-Tyr(gta)c[149452,149537]  
ggggtagcggtaacgttggagagttacggtggactgtaaatccactgcc  
tcggcttagtaggttcgaatcctatctgccccacca  
1-11tRNA-Ile(gat)c[149545,149618]  
tgggtgattcgtatagagtaataacaatcggctgataaccgataaacgga  
agttcgattcttccatccaccatc  
1-12tRNA-Glu(ttc)c[149772,149845]  
tggcgcatggtaaatgggttaagacggtagccttcacgctacagtaac  
gggttcgagtcctcgatgcgctat  
1-13tRNA-Cys(gca)c[149854,149930]  
agggctatggtgaagtggaacaacacatctggttgcaaccagacaatcg  
ccagttcgaatctggttagtccttcca  
1-14tRNA-Phe(gaa)c[149937,150010]  
tggctctctagctgagatggattagcaaaggactgaaaatccttggaggt  
tggttcgataccaacgggagccat  
1-15tRNA-Met(cat)c[150014,150086]  
tgcggtgaggacaacggctaagtgtgctggctcataaccaagagatagt  
gggttcgattcccaccaccgtaa  
1-16tRNA-His(gtg)c[150138,150210]  
cagttgtggcgtaattggctaacgcagtggtgactgtgaatccacgaatga  
gggttcgattccctccatgtga  
1-17tRNA-Gln(ttg)c[150269,150345]  
tttcgagtagacaaactggtaaagtcactagccttgaagctagggtt  
ggaggttcgaagccttctcgaagtc  
1-18tRNA-Gly(gcc)c[150355,150427]  
tgtggaattagtttagaggtaaaattctgattgccattcagaggtcaag  
ggttcgattcccttattccacat

1-19tRNA-Trp(cca)c[150428,150501]  
 atacccttagtgaatgtagcacaggagctccaaaacttctagtctgg  
 gttcaaatcctagagggtatgcca  
 1-20tRNA-Asp(gtc)c[150503,150576]  
 ggctcgttagtttaaaggaaaaatactgcactgtctatgcagagttaggg  
 gttcgattcccctacgggtcgcca  
 1-21tRNA-Asn(gtt)c[150579,150653]  
 tggggtgtagcttaaaggtaaagcagtcggctgttaaccgaaagagtga  
 ggtcaattcctatcaccccagcca  
 >KJ410132.1 Mycobacterium phage 20ES, complete genome  
 1-1tRNA-Gln(ctg)[4425,4503]  
 ttcccgactagcacaactgtagctgcgctcggctctggaccgagaggtt  
 tgagggtcgaatccttggtcgggagccca  
 >KF926093.1 Lactococcus phage phiL47, complete genome  
 1-1tRNA-Met(cat)[48524,48596]  
 ggttctttagcttaactggtaaagccctccgctcataacggagtaagtgc  
 aggttcaagtcctgcaagaacca  
 1-2tRNA-Arg(tct)[50343,50415]  
 gttcggttagtgaattggataacacacagaatttctaattctgtactct  
 ggattcgagttccagactgagca  
 1-4tRNA-Asp(gtc)[51213,51287]  
 tgactcattggtagcggttatcacacttgctgtcacgcaagagagca  
 tgggttcgaatcccatatgggtcgt  
 1-5tRNA-Ala(cgc)[51639,51709]  
 cacggatgtgtagtaagtaactacagagggtcgccacctttcatgcagg  
 ttcaagtcctgctgtctgtgt  
 1-6tRNA-Asn(att)[52830,52905]  
 ttgattggtaactcagttggttagagtgtgactattaatcaagaagtc  
 gtgagttcgaatctcacccaatcagt  
 1-7tRNA-Trp(cca)[53114,53184]  
 atctatttagttagtggtaacacatcagattccaaacctgataacgtgg  
 gttcgattcctacaatggatg  
 1-8tRNA-Met(cat)[53400,53473]  
 tacggggtgggtggcaaggctgcacgcttggtcataaccaagaaagag  
 cgggtcgattccgttaccgccgaat  
 >JF270478.1 Psychrobacter phage Psymv2, complete genome  
 1-1tRNA-Leu(caa)[11082,11160]  
 tcgtaggtagctcagttggttagagccgtggtgatattgccactagggt  
 cgcaggttcaagtcctgcccttcgagcca  
 >KF614509.1 Rhizobium phage vB\_RleS\_L338C, complete genome  
 1-1tRNA-Pro(ggg)c[104333,104415]  
 ctcgacgtagaggacggggcgctgcgcgatcacctggggcgtgatccgga  
 ggagcctgtgctgttcgatgccgatgcccgga  
 >HG934469.1 Salmonella phage vB\_SenS-Ent2 complete genome

1-tRNA-Ser(tga)c[5636,5714]  
aactggaataattgaggcaaaattaagggcccttgaagggccttctgt  
tactcaggttctgagaccttagccgctt

>KF977490.1 Rhizobium phage vB\_RglS\_P106B, complete genome  
1-tRNA-Leu(taa)c[36501,36576]  
gcgcgtgtatcccaataggttagaggaaacagacttaaaatctgtaaagt  
tcggttcgaaccgtccacgcgcacca

>KF986246.1 Mycobacterium phage MichelleMyBell, complete genome  
1-tRNA-Gly(gcc)[11615,11688]  
caggatagtgccgaggcagcggcccgctgccagacgcgccagtggt  
gccgtacgactcgaacttccgcc  
1-2tRNA-Thr(ggt)[27759,27836]  
gatcctacggacgggaaaggacgtactacggtctgtaatccgcaggtc  
gctggttcgagcccagctggggcacca

>JN680858.1 Mycobacterium phage Rumpelstiltskin, complete genome  
1-tRNA-Lys(ctt)[62637,62711]  
gccaccttagctcagttgtagagctgccgactcttaacggtaggtcac  
aggttcaagtcctgtacgggtacc

>JN408461.1 Mycobacterium phage Trixie, complete genome  
1-tRNA-Trp(cca)[6009,6082]  
gggcatgtagctcaatcggtagagcagcgtctccaaagccgccgttcc  
aggttcgagtcctggcagggccgc  
1-2tRNA-Glu(ctc)[6117,6190]  
gtcccttgagtagcggtaactcatctgactctcaatcagaagatcgc  
gggttcgaaccccgaggagtagc

>JN698994.1 Mycobacterium phage DS6A, complete genome  
1-tRNA-Lys(ttt)[13981,14071]  
cggacgcatgggaaggcgtcaagaccgatttctgcggtgtgggaatgg  
ttgcgcggcaagttgagcggtcaaatcggcgtgtccgc

>JN699005.1 Mycobacterium virus Alma, complete genome  
1-tRNA-Glu(ctc)[5913,5985]  
ggtccgttgagtagcggcaactcatctgactctcactcagaagatcgcg  
ggttcaaatccgcacggactac

>KJ173786.1 Microbacterium phage vB\_MoxS-ISF9, complete genome  
1-tRNA-Val(gac)[56201,56284]  
gcgtcggtagctcaattggtcagagcggatctcgcagcagcagataaccg  
aaagcgatgcgggttcgagtcctccgacgcac

>KJ194585.1 Mycobacterium phage Seabiscuit, complete genome  
1-tRNA-Trp(cca)[1893,1968]  
tggctcttagctcaattggttagagcagcgtctccaaaaccgccggttg  
caggttcgagtcctgcagagtcagcc

>KJ668713.1 Escherichia phage e4/1c, complete genome  
1-tRNA-Arg(cct)[46736,46811]  
gttctgctggcgtaacaggataacgcagagacctctaagtctcagttac



tggttcgagtcagtcggaacgccca  
 >JN643714.1 Mycobacterium phage BarrelRoll, complete genome  
 1-tRNA-Trp(cca)[1003,1076]  
 ggggtgttagctcaatcggtagagcagcggctccaaacgcggttgc  
 acgttcgagtcgtgccgcggccgc  
 >JN243855.1 Mycobacterium phage Larva, complete genome  
 1-tRNA-Trp(cca)[588,663]  
 tcgcagatagctcaattggtagagcagcggctccaaaaccgcggttgc  
 aggttcgagtcctgctctgcgggccca  
 >GU580941.1 Rhodococcus phage ReqiPepy6, complete genome  
 1-tRNA-Ala(agg)[41206,41280]  
 agactcgtagctcagttggaatgagcgtcgtcagcaatgacgaaggtcgc  
 aggttcgagtcctgccgagctttcc  
 >JN698997.1 Mycobacterium phage Courthouse, complete genome  
 1-tRNA-Gly(tcc)[91615,91687]  
 gcgcttgggtcgaattggaaagactcctggctccaccaggttatgca  
 ggttcgagtcctgtcgagcgctc  
 1-tRNA-Tyr(gta)[92788,92860]  
 tggcccgtagctcaattggcagagcagccggcggttaattcggcgctctc  
 ggttcgagtcggggcggtacc  
 >JN572689.1 Mycobacterium phage Perseus, complete genome  
 1-tRNA-Leu(taa)[23731,23805]  
 gccctatagcccaattggaagaggcagcgggttaaaaccgtgtggtg  
 acggctcgaatccggctaggggcac  
 >JN408460.1 Mycobacterium phage Turbido, complete genome  
 1-tRNA-Gln(ctg)[4859,4933]  
 tccccgttcgtcaattggcaagacgccgggtctggccccgtaattga  
 ggttcgagtcctgatggggaacca  
 >JN382248.1 Mycobacterium phage Lilac, complete genome  
 1-tRNA-Arg(cct)[63338,63421]  
 atggcccgtagctcagtcaggtagagcagccttggcccttgcgggcttgg  
 ttcgtccccggttcaaatccggcgggccttgcc  
 1-tRNA-Gly(tcc)[63424,63496]  
 gcgcccgtggtcgaattggaaagactcctggctccaccaggttatgca  
 ggttcgagtcctgtcgggcgctc  
 >JN153085.1 Mycobacterium phage Doom, complete genome  
 1-tRNA-Trp(cca)[2409,2484]  
 tggctcttagctcaattggtagagcagcggctccaaaaccgcggttgc  
 caggttcgagtcctgcagagtcagcc  
 >JN201525.1 Mycobacterium phage Thibault, complete genome  
 1-tRNA-Gly(tcc)[90680,90752]  
 gcgcttgcggtcgagttggaagactcctggctccaccaggttatgca  
 ggttcgagtcctgtcgagcgctc  
 1-tRNA-Tyr(gta)[91857,91929]

tggcccgtagctcaattggcagagcggccggcggttaattcggcgcgtctc  
 ggttcgagtcgggctacc  
 >JN698999.1 Mycobacterium phage Blue7, complete genome  
 1-tRNA-Asn(gtt)[5396,5468]  
 tgggtgtagctcaatggcagagcaccggctgtaaccggacggtgaa  
 ggttcgaatcctccataccagc  
 1-2tRNA-Trp(cca)[5472,5545]  
 gcgctcctagctcaattggtagagcagcggctccaaagccgcgagttcc  
 aggttcgaatcctgggagcgtgc  
 1-3tRNA-Gln(ctg)[5587,5659]  
 tccctgttcgtctaatacggttaagacaccgggctctggatccgtaatcga  
 ggttcgagtccttgatggggagc  
 >HG934470.1 Salmonella phage vB\_SenS-Ent3 complete genome  
 1-tRNA-Ser(tga)c[5640,5718]  
 aactggaataattgaggcaaaattaagcccctgaagggcctttcgt  
 tactcaggttctgagaccttagccgcttt  
 >JN412589.1 Mycobacterium phage Patience, complete genome  
 1-tRNA-Gln(ttg)[57360,57432]  
 tgccctcatggttaattggcagcacagtggttttggtccacttagttca  
 ggttcgagtcctggtgaggcagc  
 >JN256079.1 Mycobacterium phage Charlie, complete genome  
 1-tRNA-Thr(ggt)[27442,27519]  
 gatcctacggacgggaaaggacgtactacggtctggtaatccgcaggtc  
 gctggttcgagcccagctggggcacca  
 >GU580942.1 Rhodococcus phage ReqiPoco6, complete genome  
 1-tRNA-Ala(agc)[42700,42775]  
 gagactcgtagctcagttggaatgagcgtcgtcagcaatgacgaaggtcg  
 caggttcgagtcctgccgagctcttc  
 >KJ190157.1 Escherichia phage vB\_EcoS\_FFH1, complete genome  
 1-tRNA-Met(cat)c[27984,28059]  
 agttagtggcagagtggttatgcacctccttcatacggagcgactacag  
 tggttcaaatccactactaactacca  
 1-2tRNA-Ile(gat)c[28156,28232]  
 acttcggtagcttagcgatctaaagcactcggctgataaccgagagatcg  
 ggggtttaaatccctcccggagtacca  
 1-3tRNA-Thr(tgt)c[28613,28687]  
 gctcctaaagcattgctggcgatgcagttgccttgaagcatctgaaccg  
 ggttcgattcctggtgggagcacca  
 1-4tRNA-Gln(ttg)c[29177,29254]  
 tggggattagcttagcctggtctaaagcttcggccttgaagtcgagatc  
 attggttcaaatccaatatcccctgccca  
 1-5tRNA-Gln(ctg)c[29261,29336]  
 agaaggttagccaagtgcggttaaggctggggtctctgaaacccgatcag  
 tggttcgaaccactaccttctgccca

1-6tRNA-His(gtg)c[29546,29622]  
gtggctatatcataattgggtaatgatcctgattgtgaatcaggcctatg  
tggaatcgaattccactagccacccca  
1-7tRNA-Leu(tag)c[30299,30375]  
gcgtgattgatggaattggcatacataccgtccttagaagtcgggtttg  
agggttcgaatccctgtcacgcacca  
1-8tRNA-Ala(tgc)c[30381,30459]  
gggggatgggtctgctaggggtggacacctcgttgcaccgaggacatca  
gaacgattcgaattcgttatcctccacca  
1-9tRNA-Val(tac)c[30972,31045]  
gctcggtagtttaatgggagaaccccgctttacacggcggttgtgata  
gttcgattctatcaccgagtacca  
1-10tRNA-Lys(ttt)c[31514,31592]  
aggctgctagctcaataggtttagtagcatccgacttttaacggaaggt  
tctgggttcgagtcacaggcgatctacca  
1-11tRNA-Met(cat)c[31782,31859]  
tgcgggtagatctctggtagagatcgctagctcataagctagaaagag  
gtaggttcgattcctgcacccgcttcca  
1-12tRNA-Pro(tgg)c[31866,31941]  
cagtgcgtagcgcagttggtagcgtgggagccttggatgcttcgggtcgc  
agggttcgagtcctgccgcactgacca  
1-13tRNA-Asp(gtc)c[32975,33051]  
gcgaccgggctggcttggtaatgttactcccctgtcacgggagagaatg  
tgggttcaaattccatcggtcgcgcca  
1-14tRNA-Asn(gtt)c[33349,33431]  
gggtcgtagccaagcggttggcggtaggactgttaatccatgtcgaaag  
acaacgtaggttcgaatcctacacggcccgcca  
1-15tRNA-Cys(gca)c[33584,33659]  
cgaccgttggctgaagggttaggcgaaggattgcaaatccttttatgt  
gagttcaaatctcatgcggtcgtcca  
1-16tRNA-Phe(gaa)c[34019,34093]  
gcaccttagctgagatggattagcgttgcctgaagagcttgagaggt  
cgttcgatacgaacagggtgcacca  
1-17tRNA-Trp(cca)c[34100,34176]  
attcctagagtgttactggacagcatgtcggctcctccaaaccgtacggtc  
taggttcgagtcctagtaggtttgcca  
1-18tRNA-Glu(ttc)c[34185,34261]  
gtcctgtagacaaactggtaaagtcactaccctttcaaggtaggattg  
cgggttcgatccccgcacaggacgcca  
1-19tRNA-Tyr(gta)c[34269,34359]  
gttgattagtagtaggtagcgaagcagactgtaaatctgccgact  
cggaagggtctcgggtgggttcgactccatcatccaacacca  
1-20tRNA-Leu(taa)c[35238,35314]  
gggggtgtaatcgaattggcataggtactggacttaaaattcagggtttg

tgggttcgaatcccaccaccctacca  
 1–21tRNA–Ser(gct)c[35614,35702]  
 ggaagaatagcataacggtattgcagcagattgctaattctgcggttga  
 aatatagccttgggttcgattcccgttcttccgcca  
 1–22tRNA–Arg(tct)c[39237,39311]  
 cggggtgtagtctaaggagaggcaggagtcttctaaattcctttatgca  
 ggttcgaatcctgtcacctcggcca  
 >KJ510415.1 Mycobacterium phage Phantastic, complete genome  
 1–1tRNA–Trp(cca)[3799,3872]  
 aggcgcgtagctcaattggaagagcagcggctctccaaagccgcccgtgc  
 aggttcgagccctgccgcgtctgc  
 >KJ127303.1 Enterococcus phage VD13, complete genome  
 1–1tRNA–Trp(cca)[29431,29504]  
 tgagttgttagtgaatggtagcacaacagtctccaaaactgtagaga  
 gggttcgattccttactcgttgc  
 >KJ507100.1 Pseudomonas phage phiPSA1, complete genome  
 1–1tRNA–His(gtg)[24232,24326]  
 tcgcgcataatggcgcaggtgggattggcggttctggtgaacaatcagcgt  
 ggtggtcatggtcatgctccggggttgagccccgatgcgcggg  
 >KJ804259.1 Staphylococcus phage 6ec, complete genome  
 1–1tRNA–Pro(tgg)[9981,10054]  
 cagaatgtagtcaattgtagaataccacattgggatgtggtggtg  
 ttggtcaaatccagccattctga  
 >KF771238.1 Escherichia phage bV\_EcoS\_AHS24, complete genome  
 1–1tRNA–Arg(cct)[45859,45934]  
 gttctgctggcgtaacaggataacgcagagacctcctaagtctcagttgc  
 tggttcgagtcagcgcagaacgcca  
 >KF771237.1 Escherichia phage bV\_EcoS\_AHP42, complete genome  
 1–1tRNA–Arg(cct)[46266,46341]  
 gttctgctggcgtaacaggataacgcagagacctcctaagtctcagttgc  
 tggttcgagtcagcgcagaacgcca  
 >KJ567042.1 Mycobacterium phage OkiRoe, complete genome  
 1–1tRNA–Trp(cca)[822,897]  
 tcgcaggtagctcaattggtagagcagcggctctccaaaccgcccgttgc  
 aggttcgagtcctgctctgcgggcca  
 >KF771239.1 Escherichia phage bV\_EcoS\_AKS96, complete genome  
 1–1tRNA–Arg(cct)[45370,45445]  
 gttctgctggcgtaacaggataacgcagagacctcctaagtctcagttac  
 tggttcgagtcagtcggaacacca  
 >GU339467.1 Mycobacterium phage RedRock, complete genome  
 1–1tRNA–Trp(cca)[6249,6322]  
 gggcacgtagctcaatcggtagagcagcggctctccaaagccgcaggttcc  
 aggttcgaaccctggcgggctcgc  
 >KJ608188.1 Enterococcus phage EFC–1, complete genome

1-tRNA-Met(cat)[37009,37083]  
ggaccattagctcagttggtagagcaaacggctcataaccgttcggtca  
caggttcgagtcctgtatggtccac

>KP027206.1 Mycobacterium phage Milly, complete genome  
1-tRNA-Arg(gcg)[665,757]  
caccgcttagcgaggttcgcgccacgtcattgcgccgacggcatcgtg  
tcgacggcctggccgtcggtgtgtgcacgtgcgcggcgatgg

>KM101123.1 Mycobacterium phage Minerva, complete genome  
1-tRNA-Gly(tcc)[93356,93428]  
gcgcttggtcgagttggaagactcctggctccaccaggttatgca  
ggttcgagtcctgtcgagcgctc

>KJ567043.1 Mycobacterium phage Gaia, complete genome  
1-tRNA-Leu(caa)[39120,39203]  
gcccgaatggcgaacggaagacgcgccggactcaaaatccggtgtccgc  
aaggacgtgtgagttcgaatctcacttcgggcac  
1-2tRNA-Lys(ttt)[78498,78572]  
tggtccgtagctcaattggtcagagcagctgacttttaacagcgggttc  
cgggttcgacccccggcggcctac  
1-3tRNA-Asn(gtt)[78708,78781]  
tgcccgtagctcaattggcagagcgcggcactgtaacgggtggttcc  
aggttcgagtcctggcgcgccagc

>KM514685.1 Lactobacillus phage Ldl1, complete genome  
1-tRNA-Ile(tat)c[66893,66964]  
cgagcaatagctcaaaggtagagcagacacctataagtgaagataaga  
gttcgattctcttttgcgcga

>KM101120.1 Mycobacterium phage Trike, complete genome  
1-tRNA-Trp(cca)[1673,1746]  
aggcatgtagctcaattggtagagcagcggtctccaaagccgcggttc  
aggttcgagtcctgccgtgtctgc  
1-2tRNA-Gln(ctg)[1753,1825]  
tcctcgttcgtctaatacggtaggacaccaggctctggacctgggggttga  
ggttcgagtccttggcgaggagc  
1-3tRNA-Asn(gtt)[1860,1933]  
tgacgtgtagctcaaccggcagagcaggcggtgtaaccgcccgggttg  
aggttcgagtcctccctcgtcagc

>KM083128.1 Mycobacterium phage Sparky, complete genome  
1-tRNA-Ser(gct)[28252,28338]  
ggaggtctaattcggctggggccggaacccggtgctagcgggtgtgatc  
cgattctgggttcagttcgattctgcagacctccgc  
1-2tRNA-Pro(tgg)[28557,28632]  
cggggtgtagctcagcttggccagagtgccgggtttgggtaccggacgtc  
gcgggttcaaatcccgcccccggac  
1-3tRNA-Trp(cca)[28636,28707]  
gcgcctctggttagtggcagcacaacggcttccaaacccgttggcggga

gttcaattctctcgaggcgcgc  
1–4tRNA–Tyr(gta)[28726,28810]  
gcgggtctgcaactgggtgctgcagggggcctgtaaagccctcgccgcagg  
cgcggcgatggagagttcgattctctcgccccgcac  
>KM677185.1 Lactococcus phage WRP3, complete genome  
1–1tRNA–Met(cat)[48734,48806]  
ggttcttagcttaactggtaaagcccttcgctcataacggagtaagtgc  
aggttcgagtcctgcaagaacca  
1–2tRNA–Arg(tct)[50816,50890]  
tgctcggttggtgaagctggatatcacacagaatttctaattctgtatca  
agggttcaaatcccttactgagtat  
1–4tRNA–Asp(gtc)[51612,51682]  
ggcttattagatatgggtactacacatccctgtcacggaggagaaccga  
gttcgagtcctcgataagccg  
1–5tRNA–Pro(tgg)[52031,52102]  
caggatatagtgttaatggtagcatgcgtgttttggaacatgtagtgtt  
ggttcgagtcagctatcctga  
>JN831653.1 Mycobacterium virus Fionnbarth, complete genome  
1–1tRNA–Arg(gcg)[14197,14290]  
tcggcgcgctgcgcaggagatgggcagcagcgttcgcgccaccctgtcg  
aacctcaaggcggcctattcgcggttcggtgccgagctgtcggg  
1–2tRNA–Lys(ttt)c[30843,30918]  
gccccgctagctcaatcggaagagcagccggctttaaccggcgggtacg  
gagatcgaaactccggcggggcacca  
>KM979354.1 Enterobacteria phage DT57C, complete genome  
1–1tRNA–Met(cat)c[24959,25034]  
agttagttggcatagtggttatgcacctccttcatacggagcgactacag  
tggttcaaatccaataactaacca  
1–2tRNA–Gly(tcc)c[25586,25660]  
gcgtgattagttcagcggctagaataactggctccaaccagtagacacg  
agttcgactctcgatcccgacca  
1–3tRNA–Gln(ttg)c[25672,25749]  
tggggattagcttagcttggcctaagctacggcatttgaagtcgagatc  
attggttcaaatccaatatcccctgcc  
1–4tRNA–Gln(ctg)c[25756,25831]  
agaacctgagccaagtcggttaaggccgggtctctgaaatcctgatcag  
tggttcaaatccactaccttctgcc  
1–5tRNA–Arg(acg)c[26249,26323]  
gcgtccttatttcaatggaagaatgtaaaggccacgaactttacgattgg  
ggttcgattccctgaggatgcacca  
1–6tRNA–His(gtg)c[26330,26406]  
gtggctatatcataattggttaatgatcctgattgtgaatcaggcctatg  
tggattcgaattccactagccaccca  
1–7tRNA–Leu(tag)c[26941,27017]

gcgtgattgatggaattggcatacataccgtccctagaagtcgggttttg  
agggttcgaatcccttgcacgcacca  
1-8tRNA-Ala(tgc)c[27023,27096]  
ggggatatagtttaatggtagaacatctgcttgcacgcagaagacgagg  
gttcaactccctctttccacca  
1-9tRNA-Pro(cgg)c[27465,27540]  
cagtgtagcgcagttgtagcgtgggaccctcggatgatcgggtcgc  
aggttcgagtcctgccgcactgacca  
1-10tRNA-Met(cat)c[29014,29088]  
gggtcggtagctaaagttaaagcggggcctcataagctaacgagtagg  
agttagattctcctccgaccacca  
1-11tRNA-Ser(gct)c[29095,29183]  
ggaagaatagcataacggtattgcagcagattgctaactgtcggttga  
aatatagccttgggttcgattcccgttctccgcca  
1-12tRNA-Arg(tct)c[30917,30991]  
cggggtgtagtctaaggagaggcaggagtcttctaattcctttatgca  
ggttcgaatcctgtcacctcgcca  
1-13tRNA-Ser(act)c[31492,31565]  
tgccgatctagtataaacggtattatcaagccgtaactggtggaagatgt  
aggttcgaatcctacgatcggtaa  
>CP000315.1 Clostridium phage phiSM101, complete genome  
1-1tRNA-Asn(gtt)c[19562,19635]  
gggaacattgttcaatggtagaacggttggtgttaaccaactaatggga  
gttcaattctctgttcccgcca  
>KT945994.1 Enterococcus phage vB\_EfaS\_IME197, complete genome  
1-1tRNA-Glu(ttc)[13671,13744]  
tggcgtgtagctcaattggtgagagcggttggtttcaatcaagtacatg  
caggttcgactcctgtcacgtcaa  
1-2tRNA-Met(cat)[37521,37594]  
ggaccattagctcagctggttagagcaaacggctcataaccgttcgggtca  
caggttcgagtcctgtatggtcca  
>KT968831.1 Pseudomonas phage YMC11/02/R656, complete genome  
1-1tRNA-Gly(tcc)c[49179,49254]  
gcggctctagctcaactggcagagcgtgtcctccaagtcggatgttgc  
gggttcaagtcccgagcggtcca  
>KT372002.1 Rhodococcus phage CosmicSans, complete genome  
1-1tRNA-Asn(gtt)[1503,1576]  
tcacgtatagctcaatcggcagagcaacgcactgttaaggcgggggttga  
aggttcgagtccttctacgtgagc  
1-3tRNA-Trp(cca)[1702,1776]  
gggcacgtagctcaattggatagagccccgggtctccaaagccggtggttg  
ggggttcgagtcctccgggcctgc  
>KT588442.1 Mycobacterium phage LadyBird, complete genome  
1-1tRNA-Gln(ctg)[4416,4493]

ttcccgctagcacaacggtagctgcgctcggctctggaccgagaggtt  
 gaggttcgaatccttgccgggagccca  
 >KR080199.1 Mycobacterium phage Baee, complete genome  
 1-tRNA-Arg(ccg)[35179,35273]  
 cccggcaagttctggcactggtggggaccaacacctccgacgagtggt  
 gggaccggtcgagcccgccagcggttcaacctcgctaccgggc  
 >KP137435.1 Mannheimia phage vB\_MhS\_587AP2, complete genome  
 1-tRNA-Arg(tct)c[37159,37234]  
 gaccgcatagttcagtgatagagcagctgccttctaagcagtggtcga  
 gattcgaatctctcgcggtcgcca  
 1-2tRNA-Trp(cca)[45736,45811]  
 aagggtgtagctcaataggtagagcaacggtctccaaatcgttggtgt  
 tggttgagtccaaccacccttcca  
 >KP143763.1 Salmonella phage Shivani, complete genome  
 1-tRNA-Met(cat)c[30476,30551]  
 agttagttggcagagtggttatgcacctccttcatacggagcgactacag  
 tggttcaatccactactaactacca  
 1-2tRNA-Ile(gat)c[30648,30724]  
 gcttcggtagcttagcgatctaaagcactcggctgataaccgagagatcg  
 ggggtttaaaccctcccgagtacca  
 1-3tRNA-Asp(gtc)c[31810,31886]  
 gcgaccgggctggcttgtaattgtactcccctgtcacgggagggaatg  
 tgggtcaaaccatcggtcgcgcca  
 1-4tRNA-Asn(gtt)c[32184,32266]  
 gggctgtagccaagcggttggcggcgattgtaatccgtgtcgaaag  
 acaacgtaggttcgaatcctacacggcccgcca  
 1-5tRNA-Cys(gca)c[32419,32494]  
 cgaccgttggtgaatggcttaggcgaaggattgcaaacccttttatgt  
 gattcaaattctcatcggtcgcca  
 1-6tRNA-Tyr(gta)c[33012,33095]  
 gcatcgttggcagaatgtctattgcagcggctgttaaatccgtgcccttc  
 ggggttggtggttcaaaccatcacgatgcacca  
 1-7tRNA-Met(cat)c[33972,34046]  
 gggtcggtagcttaaagttaaagcggtaggcctcataagctaacgagtagg  
 agttagattctcctccgaccacca  
 1-8tRNA-Ser(gct)c[34053,34141]  
 ggaagaatagcataacggtattgcagcagattgctaattctgcggttga  
 aatatagccttggtggtcgattcccccttcttcgcca  
 1-9tRNA-Arg(tct)c[36153,36227]  
 cggggtgtagtctaaggagaggcaggagtcttctaattcctttatgca  
 ggtcgaatcctgtcacctcgcca  
 1-10tRNA-Ser(act)c[36728,36801]  
 tgccgatctagtataaacggtattatcaagccgtaactggtggaagatgt  
 aggttcgaatcctacggtcggttaa



>KM363596.1 Mycobacteriophage Omnicron, complete genome  
1-tRNA-Trp(cca)[789,865]  
atcgggtagctcaattcggtagagcagcggtctccaaaaccgcccgttg  
caggttcgagtcctgccccgtgtgcca

>KT222941.1 Mycobacterium phage NelitzaMV, complete genome  
1-tRNA-Arg(cct)[61221,61304]  
atgccccgtagctcagtcaggtagagcagccttgccccctgcccgttg  
ttcgccccggttcaatccggcgggccttgcc  
1-2tRNA-Gly(tcc)[61307,61379]  
gcgcccgtggtcgaattggaaagactcctggctccaccaggttatgca  
ggttcgagtcctgtcggcgctc

>KT184694.1 Mycobacterium phage Smeadley, complete genome  
1-tRNA-Trp(cca)[4055,4128]  
gggtcagtagctcaattggtagagcagcggttccaaagccgctcgttgg  
gggttcgagtcctcctggcctgc

>KR011062.1 Tsukamurella phage TIN2, complete genome  
1-tRNA-Asn(gtt)[12390,12463]  
tggtatagctcaattggcagagcagcgactgtaatcgcccgttac  
aggttcgagtcctgtttccagc

>KT989433.1 Streptomyces phage phiSAJS1, complete genome  
1-tRNA-Ala(ggc)c[54626,54723]  
ccgtccagcaggtcgcggacacgaaggcgctggccgctggcaccgtccgc  
agctggaagcaccgtgggaagctgcccgtgttcgacacggtggacggg

>KJ959632.1 Mycobacterium phage Equemioh13, complete genome  
1-tRNA-Gln(ctg)[4930,5004]  
tccccgttcgttaagcggcaagacaccgggttctggccccggcaatcga  
ggttcgagtccttgatggggagcca

>KM101119.1 Mycobacterium phage Tiffany, complete genome  
1-tRNA-Asn(gtt)[3734,3809]  
tgatctgtagctcaatcggcagagcaccggctgtaaccgggacgttgg  
aggttcgagtcctccagatcagcca  
1-2tRNA-Trp(cca)[3850,3924]  
aggcacgtagctcaattggtcagagcagcggtctccaaagccgcccgtg  
caggttcgagtcctgcccgtgtcgc  
1-3tRNA-Leu(cag)[3959,4033]  
ggctcggtaggcaaacaggcaaagccgctgtctcaggaacaggtgcgtg  
agggttcgactccctccgagctac

>KR080193.1 Mycobacterium phage Luchador, complete genome  
1-tRNA-Asn(gtt)[4324,4399]  
tgacgtgtagctcaatcggcagagcaccgcctgtaagcgggacgttcc  
aggttcgagtcctggcatgtcagcca

>FJ848883.1 Lactococcus phage CB14, complete genome  
1-tRNA-Trp(cca)[28914,28986]  
tgcgagcatagtatgtgtaatgtacagattccaaacctgtaaacgtg

ggttcgattcctgctgctcgtgt  
 >FJ848881.1 Lactococcus phage SL4, complete genome  
 1-tRNA-Trp(cca)[27455,27527]  
 tgcgagcatagtatagtggaatgccacagattccaaacctgtaaacgtg  
 ggttcgattcctactgttcgtgt  
 >KM400683.1 Mycobacterium phage Ariel, complete genome  
 1-tRNA-Gly(tcc)[91171,91243]  
 gcgcttgggtcgaattgaaagactcctggcttccaccagggttatgca  
 ggttcgagtcctgtcgagcgctc  
 1-tRNA-Tyr(gta)[92339,92411]  
 tggcccgtagctcaattggcagagcagccggcggaattcggcgctctc  
 ggttcgagtcggggcggtacc  
 >KT186228.1 Streptomyces phage Amela, complete genome  
 1-tRNA-Arg(cct)c[45162,45244]  
 cacctgctgggacgggtcaagaccacctcctgagtggtcagcgtgagcg  
 gcacacaccccggttcgagtcggggcgacgcac  
 1-tRNA-Trp(cca)c[48673,48763]  
 aagtcctacccgagtggttaggcaagaccacccagggtggcggagg  
 tggctggcaggcacacctggtcaagcccagggcacccac  
 >KR080197.1 Mycobacterium phage FlagStaff, complete genome  
 1-tRNA-His(gtg)c[42689,42779]  
 tccggcgtggacggttcggggcggtcggctgtgggtcgccgtgggaac  
 tgcgtgtcgtcctcgacgggcgccccgggtcgccggcg  
 >FJ848882.1 Lactococcus phage CB13, complete genome  
 1-tRNA-Trp(cca)[31651,31721]  
 gcgagcatagtatagtggaatgctacagattccaaacctgtaaacgtg  
 gttcgattcctgctgttcgtg  
 >KM402757.1 Mycobacterium phage Llama, complete genome  
 1-tRNA-Ser(gga)[45752,45825]  
 tcatcaactggcatagcttcgtgtcgccgctggaggcggtggcggtggc  
 ggtggtgttccgtcgggtggtgga  
 >KT004677.1 Mycobacterium phage UnionJack, complete genome  
 1-tRNA-Trp(cca)[4098,4171]  
 gggtcagtagctcaattggtagagcagcggtctccaaagccgcgagttgg  
 aggttcgagtcctccctggcccg  
 >KR011063.1 Tsukamurella phage TIN3, complete genome  
 1-tRNA-Asn(gtt)[12481,12554]  
 tggcatatagctcaatcggcagagcttccgactgttaatcggtggttac  
 aggttcaagtcctgttatccagc  
 >KT932699.1 Enterococcus phage vB\_EfaS\_IME198, complete genome  
 1-tRNA-Trp(cca)[35720,35792]  
 tgcgttgaagtgaatggctgcacaatggtctccaaaccattagagag  
 ggttcgactccttcacaacgtgt  
 >KT438500.1 Mycobacterium phage Pari, complete genome

1-tRNA-Trp(cca)[2393,2468]  
 tggctcttagctcaatttggtagagcagcggctctccaaaccgccggttg  
 caggttcgagtcctgcagagtcagcc

>KT381276.1 Mycobacterium phage Serenity, complete genome  
 1-tRNA-Trp(cca)[4230,4303]  
 gtacacgtagctcaatcggtagagcagcggctctccaaagccgccggttcc  
 aggttcgactcctggcgtgatgc  
 1-2tRNA-Gly(tcc)[25866,25934]  
 tggcgcaatagtcgaatgcaacacccattcttccaaactggatgccgg  
 ttcgatcccggtcgccgc

>KT281794.1 Mycobacterium phage Snenia, complete genome  
 1-tRNA-Tyr(gta)[39565,39648]  
 gtggcgaaggcaactgttggtttgtgcacctgcctgtaaagcaggcgct  
 tcggcttcgggggttcaattccctctcgccacac  
 1-2tRNA-Thr(cgt)[62793,62865]  
 gccaccttagctcagcggtagagcagcgcttcgtaacgcgcaggtcaac  
 ggttcgattccgttaggtggctc  
 1-3tRNA-Pro(tgg)[63218,63290]  
 cggaaacaggtgtaatggttgcatagagcggttggatcgccggggttcgg  
 ggttcgactccctggttccgac  
 1-4tRNA-Trp(cca)[63633,63706]  
 agctcggtagctcaactggtagagcagtggtctccaaagccaccggttgc  
 aggttcgactcctgtccgggttc  
 1-5tRNA-Leu(tag)[63707,63781]  
 ggttcgtaggcaactggcaagcgtctgacttagaatcaggtgttg  
 ggagttcgactctccccggaactac  
 1-6tRNA-His(gtg)[63782,63851]  
 gctaagtagcttaatggtaaagccccgggttggtccgggcgatcacgg  
 ttcaactccgtgcttaagcc  
 1-7tRNA-Gln(ctg)[64131,64205]  
 tgcccgtagcacaattggcagttgcgctcgctctgaacgcagaggttc  
 caggttcgactcctgggtgggcagc  
 1-8tRNA-Lys(ctt)[64215,64288]  
 gcgtcgttagctcagttggtagagcagggcactcttaatgctcgggtcgg  
 ggggtcaagtccctcacggcgac  
 1-9tRNA-Pyl(cta)[65431,65523]  
 tgctcaaatgggtaggccgttcccctgtcatctaaaggcaggatgcctc  
 gctgttaacaggtcacgcaggttcgaccctgctgggggagc  
 1-10tRNA-Lys(ttt)[65528,65601]  
 gccgcgctagctcagttggtagagcagctgacttttaatcagcgggtccg  
 gggttcgatccccggcgcggtac

>KT326768.1 Mycobacterium phage Tasp14, complete genome  
 1-tRNA-Trp(cca)[2429,2504]  
 tggctcttagctcaatttggtagagcagcggctctccaaaccgccggttg

caggttcgagtcctgcagagtcagcc

>KT221034.1 Streptomyces phage SF3, complete genome  
1-tRNA-Gly(ccc)[19961,20059]  
gtgtcgcccttgccgacggtgtacgtgcccggtgtcccgccggt  
cccgccggcgaccaggtcgccgggtgcttgagccgctcggcgacgcgc

>KP202969.1 Achromobacter phage JWX, complete genome  
1-tRNA-Pro(tgg)[36081,36157]  
cggagtgtagcgagtcaggtagcgcatctgcttgggagcagagggtcc  
taggttcgaatcctagtactccgacca

>KM101118.1 Mycobacterium phage Swirley, complete genome  
1-tRNA-Trp(cca)[4278,4351]  
gggtcagtagctcaactggaagagcagcggtctcaaagccgcgagttgg  
aggttcgagtcctccctggcctgc

>KP137433.1 Mannheimia phage vB\_MhS\_535AP2, complete genome  
1-tRNA-Arg(tct)[36410,36485]  
gaccgcatagttcagtgatagagcagctgccttctaagcagtggtcga  
gagttcgaatctctctgcggtcgcca  
1-tRNA-Trp(cca)[47763,47838]  
aagggttagctcagttgtagagcagcggtctccaaatcgttggtgt  
tggttgagtcgaaccacccttcca

>KM677210.1 Mycobacterium phage Larenn, complete genome  
1-tRNA-Gln(ctg)[4518,4592]  
tccccgttcgtctaagcggcaagacaccgggtctggccccggcaatcga  
ggttcgagtccttgatggggagcca

>KP719134.1 Enterobacteria phage JenK1, complete genome  
1-tRNA-Ala(tgc)[26546,26619]  
gcttgattgcaacgtagttgtaacgttgcagagttaaggcgcaggtg  
ctggttcaactccatttcaaagcc

>KT438501.1 Mycobacterium phage Theia, complete genome  
1-tRNA-Trp(cca)[4279,4352]  
gggtcagtagctcaactggaagagcagcggtctcaaagccgcgagttgg  
aggttcgagtcctccctggccgc

>KT281791.1 Mycobacterium phage Lolly9, complete genome  
1-tRNA-Tyr(gta)[39383,39466]  
gtggcgaaggcaactgttggttgcacctgcctgtaaagcaggcgct  
tcggcttcgggggttaattccctctcgccacac  
1-tRNA-Thr(cgt)[62858,62930]  
gccaccttagctcagggtagagcagcgcttcgtaacgcgcaggtcaac  
ggttcgattccgttagtggtc  
1-tRNA-Pro(tgg)[63270,63344]  
ctggttagcgcagcttgtagcgcctgatttgattcaggggtcg  
gaggttcaatccttcagccagac  
1-tRNA-Gly(tcc)[63683,63757]  
gcgctagctaccctgttggcgggtgcctgcctccaagcaggatcacg

cgggttcgattcctgtctagtgtc  
 1-5tRNA-Trp(cca)[63762,63835]  
 agctcggtagctcaactggtagagcagtggtctcaaagccaccggttgc  
 aggttcgactcctgtccgggttc  
 1-6tRNA-Leu(tag)[63836,63910]  
 ggttcgtaggcaaactggcaaagccgtctgacttagaatcaggtgtttg  
 ggagttcgactctccccggaactac  
 1-7tRNA-His(gtg)[63911,63980]  
 gctaagtagcttaatggtaaagccccgggtgtggtccgggcgatcacgg  
 ttcaactccgtgcttaagcc  
 1-8tRNA-Gln(ctg)[64260,64335]  
 tgcccgtagcacaatttggcagttgcgccggctctgaaccgggaggtt  
 ccaggttcgactcctgggtgggcagc  
 1-9tRNA-Lys(ctt)[64344,64418]  
 gcctccgtagctcagatggttagagcagccgactcttaacggcgggtcg  
 caggttcgactcctgccgggggtac  
 1-10tRNA-Asn(gtt)[65977,66048]  
 tccccgtcatctaaggcaggatgccacgctgttaacgtggtcacgcag  
 gttcgaccctgctgggggagc  
 1-11tRNA-Lys(ttt)c[66053,66126]  
 gccgcgctagctcagttggttagagcagctgacttttaacagcgggtccg  
 gggttcgatccccggcgcggtac

>KT151955.1 Brevibacillus phage Jenst, complete genome

1-1tRNA-Asn(gtt)c[7178,7252]  
 agggtagtagttcaatggtagaacgacgcactgttaatgcgtatgttgca  
 ggttcgagtcctgccttcctgcca  
 1-2tRNA-Pro(tgg)c[7356,7432]  
 cagggtgtagttcagttcgggagaacaccgcatttgggatgcggaggtcg  
 caggttcaagccctgccactctgacca  
 1-3tRNA-Met(cat)c[7434,7507]  
 gggctttagctcgaaggccgagcaggcggctcatgaccgctaggtgtgg  
 gttcgattcccacaagaccacca  
 1-4tRNA-Cys(gca)c[7546,7618]  
 gtgtctgtccctagtcggtctagggtagcgtctgcaaaaccgtattacgt  
 gggttcaagtcccaccagatgct  
 1-5tRNA-Tyr(gta)c[8396,8478]  
 ggatgagtatgtaagaggttaagctgacagagtgtaaatctgtgcctga  
 tggcttcgtaggttcaactcctacctacccac  
 1-6tRNA-His(gtg)c[8486,8574]  
 gtgtacgtggtggaatggttagacacgcaagattgtggttctgtggggc  
 gcaagccccgtgcaggttcaagtctgtctacacccca

>KP202970.1 Achromobacter phage 83-24, complete genome

1-1tRNA-Pro(tgg)c[36269,36345]  
 cggagtgtagcgcagctctggcagcgcctctgcttgggagcagagggtcc

taggttcgaatcctagtactccgacca

>KP273225.1 Mycobacterium phage Sheen, complete genome  
 1-tRNA-Asn(gtt)[5552,5627]  
 tgactttagtctcaatcggcagagcaccggctgttaaccgggcgggtga  
 aggttcgagtccttccaggtcagcca  
 1-2tRNA-Trp(cca)[5629,5704]  
 aggcacctagctcaattggtagagcggcgtctccaaagccgctggttgg  
 gggttcgagtcctcgggtgtctgcca

>JN006061.1 Mycobacterium phage Toto, complete genome  
 1-tRNA-Arg(cct)[63089,63172]  
 atggcccgtagctcagtcaggtagagcagccttgccttgcgggcttgg  
 ttctccccgggtcaaatccgggcggccttgcc  
 1-2tRNA-Gly(tcc)[63175,63247]  
 gcgcccgtggtcgaattggaaagactcctggcttccaccaggttatgca  
 gggttcgagtcctgtcgggcgctc

>KM677211.1 Mycobacterium phage Murucutumbu, complete genome  
 1-tRNA-Trp(cca)[978,1051]  
 ggggtgttagtctcaatcggtagagcagcgtctccaaagccgctgttc  
 acgttcgagtcgtgccgcgccgc

>LN887948.1 Escherichia phage slur09 genome assembly slu09, chromosome : 1  
 1-tRNA-Arg(tct)[93142,93216]  
 cggggtgtagtctaaggagagcagcaggtcttctaaattcctttatgca  
 gggttcgaatcctgtcacctcggcca  
 1-2tRNA-Ser(gct)[96753,96841]  
 ggaagaatagcataacgtattgcagcagattgctaattctgtcggttga  
 aatatagccttgcgggttcgattcccgttcttccgcca  
 1-3tRNA-Leu(taa)[97431,97507]  
 gggggtgtaatcgaattggcataggtactggacttaaaattcaggtttg  
 tgggttcgaatcccaccaccctacca  
 1-4tRNA-Tyr(gta)[98386,98473]  
 gggcggttattccgtaagtggtagcggagggttataatccctgtgca  
 ttgcgactcgagtggttcgactccattaacgcccacca  
 1-5tRNA-Glu(ttc)[98973,99049]  
 gtctgttagacaaaactggtaaagtcactacccttcaaggtaggatttg  
 cgggttcgatccccgcacaggacgcca  
 1-6tRNA-Trp(cca)[99058,99134]  
 attcctagagtgttactggacagcatgtcggctccaaaaccgtacggtc  
 taggttcgagtcctagtaggtttgcca  
 1-7tRNA-Phe(gaa)[99141,99215]  
 gcaccttagctgagatggattagcgttgcctgaagagcttgagaggtt  
 cgttcgattcgaacagggtgcacca  
 1-8tRNA-Cys(gca)[99955,100030]  
 cgaccgttggctgaatggcttaggcgaaggattgcaaatccttttatgt  
 gagttcaaatctcatgcggtcgtcca

1-9tRNA-Asn(gtt)[100183,100265]  
gggtcgtagccaagcgggttggcggtaggactgtaatccatgtcgaaag  
acaacgtaggttcgaatcctacacgccccgcca

1-10tRNA-Asp(gtc)[100563,100639]  
gcgaccggggctggcttggtaatggtactcccctgtcacgggagagaatg  
tgggttcgaatcccatcggtcgcgcca

1-11tRNA-Pro(tgg)[101674,101749]  
cagtcgctagcgcagttggtagcgtgggagccttggaatgcttcgggtcgc  
aggttcgagtcctgccgcactgacca

1-12tRNA-Met(cat)[101756,101833]  
tcggggttagatctctggtagagatcgctagtctcataagctagaagag  
gtaggttcgattcctgcacccgcttcca

1-13tRNA-Lys(ttt)[102472,102549]  
ggattgctaactcaactggataagagtaccggacctttaatccgtcagtt  
ctgggttcgaatcccaggcaatccacca

1-14tRNA-Ala(tgc)[102835,102913]  
ggggaatgggtctgcatggagtggacacctcgttgcaccgaggacatca  
ggacgggtcgattccgttattctccacca

1-15tRNA-Leu(tag)[102919,102995]  
gcgtgattgatggaattggcatacataccgtccttagaagtcgggttttg  
agggttcgaatcccttgcacgcacca

1-16tRNA-His(gtg)[103672,103748]  
tgggtatatcataattgggtaatgatcctgattgtgaatcaggcctatg  
tggattcgaattccactagccaccca

1-17tRNA-Gln(ctg)[104210,104285]  
tgggatgtagatcaattggcagatcgtcgccctgactccgaaggttcc  
tggttcgatcccaggcactccagcca

1-18tRNA-Gln(ttg)[104292,104367]  
tggagagtagtgaacggtagcacaacggccttgactccgttaatggt  
aggttcgattcctccttccagcca

1-19tRNA-Thr(tgt)[104885,104971]  
gctgggttggcagaatggttgaatgcacctgatttgaatcaggaggagt  
aatcccgttcaggttcgaatcctgtgccagcacca

1-20tRNA-Ile(gat)[105722,105798]  
gcttcggtagcttagcgatctaaagcactcggccgataaccgagagatcg  
ggggtttaatccctcccggagtacca

1-21tRNA-Met(cat)[105895,105970]  
agttagttggcagagtggttatgcacctccttcatacgagcgactacag  
tggttcaatccactactaactacca

>KP719133.1 Enterobacteria phage JenP2, complete genome

1-1tRNA-Ala(tgc)[25835,25908]  
gctttgattcgacgtagttgtaacgtttgcagagttaagacgcaggta  
ctggttcaattccattcaaagcc

>KT591489.1 Mycobacterium phage Archie, complete genome

1-tRNA-Thr(cgt)[62616,62687]  
 gctggattagcttagtggtcaagcgtgccttcgtaacgcagattaccg  
 gttcgattccggtatccagctc  
 1-2tRNA-Pro(tgg)[62874,62948]  
 ctgcttagctcagcttggttagagcggcgtttgggagcgggaggtcg  
 caggttcaaatcctgcttggcagac  
 1-3tRNA-Trp(cca)[63112,63187]  
 agctcggtagctcaattggttagagcagcggctctcaaagccggttcc  
 ccgttcaagtcggggccgggttgcca  
 1-4tRNA-Leu(tag)[63760,63834]  
 ggccctctagcccaattggttagaggcacaggttttaggtacctgtcagtg  
 cgagttcgagtctcgcgggggccac  
 1-5tRNA-His(gtg)[63835,63904]  
 gcttagtagcctagtggttaaggcagccggttgatccggtgaacctgag  
 ttcgattctcagctaaagcc  
 1-6tRNA-Gln(ctg)[63909,63983]  
 tgaccggtagcacaaactggtagttgccgcgctctggacgcggaggttg  
 ttggttcgatcccagctcgggtcagc  
 1-7tRNA-Gly(tcc)[64054,64128]  
 gtgttagtaacctatgttggtgggtgccactcttccaaagtggaattcg  
 cgggttcgattcctgtctagcacac  
 1-8tRNA-Lys(ctt)[64163,64238]  
 gcctcgttagctcagttggttagagctgccgactcttaacggttaggtcac  
 aggttcaagtcctgtacgggtacca  
 1-9tRNA-Cys(gca)[65423,65497]  
 gccgtcatggctgagtggttaggcgtcgactgcaaatccggcttatccc  
 agttcgattctgggtggcggctcca  
 1-10tRNA-Asn(gtt)[65858,65931]  
 tcctccgtagctcaattggcagagcgcgcgactgttaatcgctggttgg  
 tgggtcaggtccaccgttggagc  
 1-11tRNA-Lys(ttt)c[66126,66200]  
 gcccctatagctcagttggttagagcaggtgacttttaatcatcgggtcca  
 aggttcgatcccttgtgggggcacc  
 >KT285706.1 Mycobacterium phage Pioneer, complete genome  
 1-tRNA-Glu(ctc)[5939,6011]  
 ggtccgttgagtagcggcaactcatctgactctcactcagaagatcgcg  
 ggttcgatccccgcacggactac  
 >KT221033.1 Streptomyces phage SF1, complete genome  
 1-tRNA-Gly(ccc)c[37661,37759]  
 gtgtgcccttgcgcacggtgtacgtgcccggtgtccccgccggt  
 cccgccgggcgaccaggtcgccgggtgcttgagccgctcggcgacgcgc  
 >KM923971.1 Mycobacterium phage Kratio, complete genome  
 1-tRNA-Trp(cca)[586,661]  
 tcgcagatagctcaattggttagagcagcggctctcaaaaccggttgc



aggttcgagtcctgctctgcgggccca  
 1-2tRNA-Ala(agg)c[58003,58090]  
 ggccggctgcggggcgttctgttgcgcgtctagcggatgcgcgatgcgc  
 ggccgatgtagtgccgtgcggcgcggttgccggcctcc  
 >KP280063.1 Vibrio phage phi 3, complete genome  
 1-1tRNA-Arg(tct)c[32533,32608]  
 gcggatgtagtttaatcggatagaacactagccttctaagctttagcga  
 gggttcgaatccctctcactgcgccca  
 1-2tRNA-His(gtg)c[33160,33236]  
 gtggtcgaagcatttatcaggatgatgttcaggttgaccctgagggaaa  
 cgggttcaattcccgatcgcacccca  
 1-3tRNA-Arg(agg)c[38491,38566]  
 gcgggtatgatgtaactgtatagcatgactccctacgaaggagttcgtct  
 aggttagaatcctagtagccgcgccca  
 1-4tRNA-Phe(gaa)c[38573,38648]  
 gcagtggttagctcagtaggttagagcacgggattgaagatcctggtgtcac  
 tggttcaactccagtcctctgcacca  
 1-5tRNA-Met(cac)c[38949,39025]  
 gcgcctttagcttagttggttagagcaaacccctcataagggtgaggtcgc  
 ctggttcaagcccagcaaggtgcacca  
 1-6tRNA-Ile(gat)c[39032,39107]  
 tcccgtgtagttcagttggtagaacaggcgaccgataatcgccgcgtcac  
 tgggtcaggtccagtcattgggaacca  
 1-7tRNA-Val(tac)c[39903,39980]  
 actcggtagcaaaattggcggtgcacctcctttacacggaggctagaa  
 actggttcgattccagtagcagtagacca  
 1-8tRNA-Arg(cct)c[40663,40739]  
 gtccatgtagctcagcaggatagagcgctccctcctaaggagaggtca  
 gaggttcaaatcctctctaggacgccca  
 >KJ944841.1 Mycobacterium phage Cheetobro, complete genome  
 1-1tRNA-Arg(gcg)[14207,14300]  
 tcggcgcgctgcgcaggagatgggcagcagcgttcgcggcacccctgtcg  
 aacctcaaggcggcctattcgcggttcggtgccgagctgtcggg  
 1-2tRNA-Lys(ttt)c[30852,30927]  
 gccccgctagctcaatcggaagagcagccggctttaaccggcggttacg  
 gagatcgaaactccggcggggcacca  
 >JQ740787.1 Lactococcus Phage ASCC191, complete genome  
 1-1tRNA-Trp(cca)[31597,31669]  
 tgcgagcatagtatagtggaatgctacagattccaaacctgtaaacgtg  
 gggttcgattcctgctgttcgtgt  
 1-2tRNA-Pro(tgg)[31723,31794]  
 caggatattggtgtcaatggttagcatgcgtgttttggaacatgtggtgtt  
 ggttcgagtcagctatcctga  
 >KR905069.1 Lactobacillus phage iLp84, complete genome

1-tRNA-Ile(tat)[36908,36981]  
 ttagatgtagctcaatcggtagagcgcgcaactataattgcgtgggtgc  
 aggttcaagccctgccgtctacac

>KT246486.1 Mycobacterium phage Chadwick, complete genome  
 1-tRNA-Trp(cca)[4134,4207]  
 gggccagtagctcaactggtagagcagcggtctccaaagccgcggttg  
 aggttcgagtcctccctggcctgc

>KM233454.1 Mycobacterium phage MarQuardt, complete genome  
 1-tRNA-Asn(gtt)[3841,3916]  
 tgatctgtagctcaatcggcagagcaccggctgtaaccgggacgttg  
 aggttcgagtcctccagatcagcca  
 1-2tRNA-Trp(cca)[3957,4031]  
 aggcacgtagctcaattggtcagagcagcggtctccaaagccgcggctg  
 caggttcgagtcctgccgtgtctgc  
 1-3tRNA-Leu(cag)[4066,4140]  
 ggctcggtaggcaaacaggcaaagccgcctgtctcaggaacaggtgcgtg  
 agggttcgactccctcccagactac

>KM197169.1 Mycobacterium phage Piro94, complete genome  
 1-tRNA-Gln(ctg)[4937,5010]  
 tccccgtagtccaatcggtagcagcgtcggtctggaccgagagattg  
 aggttcgagtccttgctggggagc

>KF279418.1 Mycobacterium phage Anubis, complete genome  
 1-tRNA-Asn(gtt)[3716,3791]  
 tgacgtgtagctcaattggcagagcaccggctgtaaccgggcggtga  
 aggttcgagtccttccatgtcagcca  
 1-2tRNA-Trp(cca)[3832,3906]  
 aggcacgtagctcaattggtcagagcagcggtctccaaagccgcggctg  
 caggttcgagtcctgccgtgtctgc  
 1-3tRNA-Leu(cag)[3941,4015]  
 ggctcggtaggcaaacaggcaaagccgcctgtctcaggaacaggtgcgtg  
 agggttcgactccctcccagactac

>JQ067092.2 Pseudomonas phage PaMx42, complete genome  
 1-tRNA-Gln(ttg)c[31254,31328]  
 tgcgccgtcgccaagcggttaaggcaccggattttgattccggcattcgta  
 ggttcgaatcctaccggcgagcca

>KP137437.1 Mannheimia phage vB\_MhS\_1152AP2, complete genome  
 1-tRNA-Arg(tct)c[38473,38548]  
 gaccgcatagttcagtgtagagcagctgccttctaagcagtggtgcga  
 gatttcgaatctctcgcggtcgcca  
 1-2tRNA-Trp(cca)[49824,49899]  
 aagggtgtagctcagttggtagagcagcggtctccaaatcgttggtgt  
 tggttgagtcgaaccacccttcca

>KM925136.1 Mycobacterium phage MiaZeal, complete genome  
 1-tRNA-Gly(tcc)[91833,91905]

gcgcttggtcgaattggaaagactcctggctccaccaggttatgca  
 ggttcgagtcctgtcgagcgctc  
 1–2tRNA–Tyr(gta)[93005,93077]  
 tggcccgtagtcaattggcagagcagccggcgtaattcggcgcgctc  
 ggttcgagtcggcggtacc

>KM588359.1 Mycobacterium phage Carcharodon, complete genome  
 1–1tRNA–Thr(ggt)[28751,28828]  
 gatcctacggacgggaaggacgtactacggtctggaatccgcaggtc  
 gctggttcgagcccagctggggcacca

>KJ743987.1 Sinorhizobium phage phiLM21, complete genome  
 1–1tRNA–Met(cat)[21148,21224]  
 gtcggagtagagcagcccgtagctcgcgtggctcataaccacgaggtcg  
 caggttcgaatcctgtctccgaacca

>KR060090.1 Pseudoalteromonas phage Pq0, complete genome  
 1–1tRNA–Gly(tcc)c[14335,14408]  
 gcgtctgtagtgaattggtagcacgctgcctccaagtcagtagcggg  
 gttcgagtcaccaacagacgtcca  
 1–2tRNA–Met(cat)c[14410,14486]  
 ttccctatagcttaattggcaaagcggtcgactcataatcgaatgaagga  
 gcggttcaaatccgcctagggaacca

>KT222942.1 Mycobacterium phage Dusk, complete genome  
 1–1tRNA–Arg(cct)[62391,62474]  
 atggcccgtagctcagtcaggtagagcagccttgccccttgccggcttg  
 ttcgtcccggttcaaatccggcgggccttgcc  
 1–2tRNA–Gly(tcc)[62477,62549]  
 gcgcccgtggtcgaattggaaagactcctggctccaccaggttatgca  
 ggttcgagtcctgtcggcgctc

>KM652554.1 Streptomyces phage Jay2Jay, complete genome  
 1–1tRNA–Thr(cgt)c[16870,16941]  
 gccccgctggcgtagtggaacgcactctcttcgtaataagagtaaga  
 gttcgattctctgcgggctc  
 1–2tRNA–Gly(tcc)[72897,72969]  
 gcatcggtagttaattggtagaacgtctgactccaatcagacagcgcg  
 gttcgattcccgtcgggtgctcc  
 1–3tRNA–Gln(ctg)[73098,73170]  
 tccccttggtgaaccggcaacacaacagactctgaatctgaattcct  
 agttcgaatctaggttggggagc  
 1–4tRNA–Trp(cca)[73377,73448]  
 atgcctctgataatggtagtacaagagattccaaacctcttagcgtgg  
 gttcgattctacaggacatgc  
 1–5tRNA–Pro(tgg)[74305,74377]  
 caggcacggggaagatggaatccgttggtttggaagcctaagacactc  
 ggttcgattccgaggtgcctgac  
 1–6tRNA–Pro(tgg)[74381,74456]

cgggatatagctcagtttggtcagagcgtgcattgggatgcagaagtc  
gctggtcgaatccagttatcccgac  
1-7tRNA-Ile(tat)[77444,77518]  
gcgccagtagcataacggttcaatgcagtaggcttatatcctaccgagag  
aaggttcaattcctcctggcgtac  
1-8tRNA-Ser(gga)[78028,78114]  
ggaaggtaaagcattggttagcgggtgtcttgaaaggcactaagggtg  
ttacagcccggcagggttcaattccctggcctccgc  
1-9tRNA-Ser(tga)[78354,78443]  
tggaggcacgcattggagtcttatcgggtcttgaaccgtgatgacgta  
gtgatatgtcgtgggggttcgactccctctgtctccgcc  
1-10tRNA-Asp(gtc)[81511,81587]  
gcgtctgtagtatgtcgttcaatgcacctgattgtcaatcaggaaat  
cgcggttcaaataccgtcaggcgcgc  
1-11tRNA-Asp(gtc)[82125,82196]  
cccggcgtggtgtaatggtaacatactgcgtgtcagcgcaatgtcgagg  
gttcgattccctcgtcgggac  
1-12tRNA-Glu(ctc)[86672,86743]  
gccctatagtctaaggtaggatacaagattctcaatcttgggtcgga  
gttcaattctccgtagggttac  
1-13tRNA-Glu(ttc)[86992,87067]  
gtcccggtagattctgctgtagaatcgctagactttcaatctagagtc  
gagggttcaattccctccgggttac  
1-14tRNA-Val(tac)[87323,87394]  
gcccgcttagtcaatgggagagcgcaggtttacacaccgtatacgggg  
gttcgattccctcagtgggtac  
1-15tRNA-Leu(tag)[87588,87663]  
gcgcggtgacgggaactggcatalacattgacttagaatcaactgtt  
gggagttcgactctccacggcgtac  
1-16tRNA-Leu(tag)[87822,87896]  
gcgtcggtagcccaatggcaggaggcaccagtcttaggaactggacagt  
tgatttcgagtctcactcggcgtac  
1-17tRNA-Gly(gcc)[88218,88289]  
tccgtagtgtgtagtggtaacatactccttgccaaggaagcgttgca  
gttcgattctcgtctacgggac  
1-18tRNA-Arg(tct)[88366,88439]  
gcctcggtagcgtagtggatgacgcggatgccttctaagcatttacaggc  
aggttcgattcctgtccgaggtag  
1-19tRNA-Ala(tgc)[89222,89294]  
gggcggttagtgtaatggtagcacgagtgttgcacgcattaagcagg  
ggttcgaatcccctactgtccac  
1-20tRNA-Lys(ctt)[89455,89529]  
gattcagtcgcagaattggtactgcaaaagactcttaatctttgaggatg  
tgggttcgagtccacctaataac

1-21tRNA-Asn(gtt)[90385,90461]  
tccgggtgggctactattggcagtagcgacgagctgttaactcgttccc  
ttaggttcgattcctgcctccggagc  
1-22tRNA-Asn(gtt)[91216,91289]  
tgacctatagttcaattggcagagcagatggtgttaccatcaagttgc  
agggtcagtcctgctaggtcagc  
1-23tRNA-Arg(cct)[91987,92059]  
gtccctatagttcaagggaagaacaagactctcctaaagtctagatgca  
ggttcgaatcctgctggggatac  
1-24tRNA-Ile(gat)[92308,92383]  
gggagcgtagctcagtcgtcgagcaatgcactgataatgcatcggtc  
gctggttcaatccagccgttcctac  
1-25tRNA-Ala(ggc)[92456,92529]  
ggggtcgtagcataactggaatgcactgtatggcatacaagcgattgt  
gggttcaatcccatcgactccac  
1-26tRNA-Lys(ctt)[92726,92799]  
gctccggtagctcagttggcagagcaggggactcttaatcctcgtgcgc  
tggttcaagtccagttcggagtac  
1-27tRNA-Lys(ttt)[92923,92999]  
ggtccagtcgcacagtcgtggcagtgcaattgacttttaattttgaggac  
gtgggttcgaatccacctggaccacc  
1-28tRNA-Arg(tcg)[93002,93075]  
gcccttttagctcatctggatagagcgatggcttcgaagccatgcgtagg  
gagttcgattctctcaaggggcgc  
1-29tRNA-Met(cat)[94369,94440]  
ggcagtagggcgctcgggtgtccaacgactctcataaggtcgaggggctg  
gttcgaatccagctattgctac  
1-30tRNA-Met(cat)[94441,94512]  
ttgcaggttagtgaaacggtatcacgtagggctcataatcctaaattcct  
gttcgactcagggcctgcccc  
1-31tRNA-Tyr(gta)[95146,95228]  
gtgtgagcggcgaagttggagagacgcgaggtctgtaaaaccgttcctt  
cgggtgagtcagttcgaatctgacctcacgcac  
1-32tRNA-His(gtg)[95553,95628]  
gggttggtagctcaattggattagagcgctgcgttgtggtcgagtggtt  
gaggggttcgagtccttcctccac  
1-33tRNA-Phe(gaa)[95699,95771]  
gggcatgtagctcagttggtagagcttcgggtgaagtaccgagtcgag  
ggttcgattccctacttggccac  
1-34tRNA-Cys(gca)[96362,96437]  
ggggtagatgtagcgggtgctgccgacagtctgcaaaactgttcgtatat  
tggagttcgactctcctctatccctc  
1-35tRNA-Thr(tgt)[96453,96528]  
gccaccttagctcatttggtgtagagcgacgctctgtaaagcgtaggcg

gtcgggtcgaaccgacaggtggctc  
1-36tRNA-Thr(ggt)[96621,96692]  
gccccatagtgctagtggaacacatatccttggtacggatatatcgtc  
agttcgattctgactgggggat  
1-37tRNA-Arg(acg)[96823,96896]  
ctctccataggctaattggataaaccagagtgtacgaacgctcaattgt  
gggttcgagtcctcgctggagagac  
1-39tRNA-Ala(ggc)[100282,100356]  
tgtcacgtaattcaataggaagaatcaatgcccttggccagggtagggtta  
gaggttcgagtcctctcgtgacagc  
1-40tRNA-Leu(gag)[105356,105438]  
gcgccctatggtggaatggcagacacactagactgagactctaggccctga  
tggcgctccgggttcaactcccgggtggcggtac  
1-41tRNA-Val(gac)[105876,105947]  
acccgcttagctcaatggtagagcactgtctcgacacgaagttacgtga  
gttcaattctctcagtggttac  
1-42tRNA-Leu(caa)[106382,106458]  
ggccctgtagcagaatcaggtatatgcggcggtctcaaaccgcgctcaa  
tgtgggttcgagtcctcagggctac  
1-43tRNA-Ser(gct)[106692,106775]  
ggaaggtagcgagaggtctcgaggtagttgctaaactgctggattgt  
aaaaggttcggggtcgaatcctcctcctccgc  
1-44tRNA-Gln(ttg)[116419,116492]  
tcccctgtactctgctggttggttagccagactttgaatctggtgtcgt  
aggttcgattcctgccaggggagc

>KR080204.1 Mycobacterium phage Mindy, complete genome

1-1tRNA-Arg(cct)[62055,62138]  
atggcccgtagctcagtcaggtagagcagccttgccttgcgggcttgg  
ttcgtccccggttcaaatccggcgggccttgcc  
1-2tRNA-Gly(tcc)[62141,62213]  
gcgcccgtggtcgaattggaaagactcctggcttccaccaggttatgca  
ggttcgagtcctgtcgggcgctc

>KM401838.1 Mycobacterium phage VohminGhazi, complete genome

1-1tRNA-Asn(gtt)[5402,5474]  
tgacgttagctcaatggcagagcaccggctgtaaccggacggttgaa  
ggttcgagtccttccatgtcagc  
1-2tRNA-Trp(cca)[5479,5552]  
gcgctctagctcaattggtagagcagcggctctcaaagccgcgagttcc  
aggttcgagtcctggggagcgtgc  
1-3tRNA-Gln(ctg)[5594,5666]  
tcctgttctctaatacggaagacaccggctctggacccggcaatcga  
ggttcgagtccttgatggggagc

>KP202971.1 Achromobacter phage JWF, complete genome

1-1tRNA-Lys(ctt)[60835,60922]

acaggtgtagctcaaggagagcaccgggttcttaaccggaaggcgcgcac  
tgacgagtgttaggttcgataccgccacctgtacca

>KU998249.1 *Gordonia* phage Soups, complete genome  
1-tRNA-Asn(gtt)[5265,5339]  
tggctttagctcaacggcagagcgctcggctgtaaccgagtgggtgaa  
ggttcgaatcctccaggccagcca  
1-2tRNA-Lys(ctt)[5341,5414]  
gcatccgtagctgagtggtttagctctgggctcttaaccggagacggag  
gttcgattcctcccggatgcacca  
1-3tRNA-Gln(ctg)[5416,5488]  
tccccattcgtccaactggcaggacaccggagtctggtccggagatcga  
ggttcgaatcctcggtagggagc  
1-4tRNA-Arg(acg)c[49539,49618]  
tcggttcgctggtcggaaggtgcgactcggcctacggatccggcga  
tggccccgttcgaggtgtggaaccgatcc

>KU998244.1 *Gordonia* phage Smoothie, complete genome  
1-2tRNA-Trp(cca)[6303,6376]  
acggacgtagctcaactggtagagcagcggtctccaaaaccgcaggttgc  
aggttcaagtctctccggccgtgc  
1-3tRNA-Tyr(gta)[6442,6524]  
gtgggtgacacaccaatggtggtgtagcgggctgtaacccgtggcgttc  
tacgcgggcaggttcgatccctgccaccacac  
1-4tRNA-Ser(cga)[6692,6775]  
ggagggtatgcccattggtgggcacgcggtgcgaataccgctatacggta  
gccattccgggagttcgattcttctacctccgc  
1-5tRNA-Ser(gct)[6856,6939]  
ggcgagttatccagtctgggactgggccccgttgctagcggacgcgcac  
cctgggtgtgaggttcgattcctcagctcgccgc  
1-6tRNA-Asn(gtt)[7382,7457]  
tccggttagctcaatcggcagagcgctcggctgtaaccgagaggttga  
aggttcgaccctccaccggagcca  
1-7tRNA-Lys(ctt)[8009,8084]  
gcctctgtagctcagttggttagagaaccgcctctaagcggtagggtc  
gcaggttcgaatcctccgggggcac

>KU998250.1 *Gordonia* phage Rosalind, complete genome  
1-tRNA-Asn(gtt)[5265,5339]  
tggctttagctcaacggcagagcgctcggctgtaaccgagtgggtgaa  
ggttcgaatcctccaggccagcca  
1-2tRNA-Lys(ctt)[5341,5414]  
gcatccgtagctgagtggtttagctctgggctcttaaccggagacggag  
gttcgattcctcccggatgcacca  
1-3tRNA-Gln(ctg)[5416,5488]  
tccccattcgtccaactggcaggacaccggagtctggtccggagatcga  
ggttcgaatcctcggtagggagc

1-4tRNA-Arg(acg)c[49062,49141]  
tcggttcgctggtcggaaggtgcgactcggcgctacggatcgccgga  
tggccccgttcgaggtgtgggaaccgatcc

>KU998251.1 Gordonia phage KatherineG, complete genome  
1-1tRNA-Asn(gtt)[5265,5339]  
tggctttagctcaacggcagagcgctcggctgttaaccgagtggtgaa  
ggttcgaatcctccaggccagcca  
1-2tRNA-Lys(ctt)[5341,5414]  
gcatccgtagctgagtggttagctctgggctttaaccggagacggag  
gttcgattcctcccgatgcacca  
1-3tRNA-Gln(ctg)[5416,5488]  
tccccattcgtccaactggcaggacaccggagtctggtccggagatcga  
ggttcgaatcctcggtagggagc

>KU998245.1 Gordonia phage OneUp, complete genome  
1-1tRNA-Ser(gct)[4110,4181]  
tccccgaatgctcagggcttgagcgctgctgacgagcagagtgctgtgg  
gttcgaatcccacacggggagc  
1-3tRNA-Trp(cca)[4261,4333]  
atgggcgtagctcaattggaagagcagcggtctccaaaaccgccgtgta  
ggttcgagtcctccgcctgtgc  
1-4tRNA-Tyr(gta)[4400,4482]  
gtgggtgacacaccaatggtggtgtagccggctgaacccggtggcggtc  
tacgcgggcaggttcgatccctgccaccacac  
1-5tRNA-Ser(gct)[4719,4802]  
ggcgagttatccagctctgggactggctaccgttgctagcggctaggcatc  
ttcgggtgtgtggttcgactcctcaactcgcgc  
1-6tRNA-Phe(gaa)[5272,5349]  
cggcgtgtagctcagattggtgagagcgctcgggtgaaacccgagaggtc  
gcaggttcgagccctgccgcgccgcca  
1-7tRNA-Asn(gtt)[5351,5426]  
ttcgacgtagctcaattggcagagcgctccgactgttaatcggtggtga  
aggttcgagtccttcgctcggagcca  
1-8tRNA-Met(cat)c[48720,48795]  
gccctggtagccaagtgtggaaggcctccgactcataatcggaagatgc  
gtgggttcgagccccaccagggcac

>KR053199.1 Gordonia phage GMA4, complete genome  
1-1tRNA-Tyr(gta)[5132,5213]  
gggagtgacgacgctggtgcgtcaccggactgtaaatccggtgcgaaag  
catggcaggttcgatccctgccactcccacca

>KU998237.1 Gordonia phage Vendetta, complete genome  
1-1tRNA-Lys(ttt)c[24130,24203]  
gcccctttagctcagttggtagagctggtgacttttaactactagtcgt  
aggttcgagtcctacagggggcac

>KU998253.1 Gordonia phage Orchid, complete genome



1-2tRNA-Leu(taa)c[70492,70578]  
 gccccctgtggcgaaattcggatacgcgggagacttaaaatcttctagcc  
 ttatggctttatcggtcaagtccggtcaggggtac

>KP790011.1 Gordonia phage Gspu1, complete genome  
 1-1tRNA-Ser(cga)[846,929]  
 ggagggtgtgccgatggtcggcacgcggttcgaaagccgctacacggta  
 accattccgggggtcaattcctccgccctccgc

>KU998238.1 Gordonia phage Splinter, complete genome  
 1-1tRNA-Lys(ttt)c[24130,24203]  
 gcccttttagctcagttggtagagctggtgacttttaactactagtcgt  
 aggttcgagtcctacagggggcac

>KU998246.1 Gordonia phage ClubL, complete genome  
 1-2tRNA-Trp(cca)[6312,6385]  
 acggacgtagctcaactggtagagcagcggtctccaaaaccgcaggttgc  
 aggttcaagtcctgccggccgtgc  
 1-3tRNA-Tyr(gta)[6451,6533]  
 gtgggtgacacaccaatggtggtgtagcgggctgaacccgtggcggtc  
 tacgcgggcaggttcgatccctgccaccacac  
 1-4tRNA-Ser(cga)[6701,6784]  
 ggagggtatgcccatggtgggcacgcggtgtgaataccgctatacggta  
 gccattccgggagttcgattcttctaccctccgc  
 1-5tRNA-Ser(gct)[6902,6985]  
 ggcgagttatccagtcctgggactgggccccgttgctagcggacgtgcatc  
 ttcgggtgtgaggttcgattcctcagctcgccgc  
 1-6tRNA-Asn(gtt)[7067,7142]  
 tggcacgtagcttaattggcaaagtcgtcggttggtaccgattggatga  
 aggttcaaatccttccgtgtcagcca  
 1-7tRNA-Lys(ctt)[7940,8015]  
 gcctctgtagctcagttggttagagcaaccgctcttaagcgggtgggtc  
 gcaggttcgaatccttcggggggcac

>KU998247.1 Gordonia phage Bachita, complete genome  
 1-2tRNA-Trp(cca)[6811,6884]  
 acggacgtagctcaactggtagagcagcggtctccaaaaccgcaggttgc  
 aggttcaagtcctgccggccgtgc  
 1-3tRNA-Tyr(gta)[6950,7032]  
 gtgggtgacacaccaatggtggtgtagcgggctgaacccgtggcggtc  
 tacgcgggcaggttcgatccctgccaccacac  
 1-4tRNA-Ser(cga)[7200,7283]  
 ggagggtatgcccatggtgggcgcgcggtgtgaataccgctatacggta  
 tccattccgggagttcgattcttctaccctccgc  
 1-5tRNA-Ser(gct)[7401,7484]  
 ggcgagttatccagtcctgggactgggccccgttgctagcggacgtgcatc  
 ttcgggtgtgaggttcgattcctcagctcgccgc  
 1-6tRNA-Asn(gtt)[7566,7641]

tggcacgtagcttaattggcaaagtcgtcggtgttaccgattggatga  
 aggttcaaatccttccgtgtcagcca  
 1-7tRNA-Lys(ctt)[8439,8514]  
 gcctctgtagctcagttggttagagcaaccgcctctaagcgggtgggtc  
 gcaggttcgaatccttccgggggcac  
 >KU998240.1 *Gordonia* phage Woes, complete genome  
 1-1tRNA-Asn(gtt)[20495,20567]  
 tggccgtagctcaatggcagagcgcggcactgttaacgggtggtgaa  
 ggttcgagtccttccggtccagc  
 >KU998241.1 *Gordonia* phage Monty, complete genome  
 1-1tRNA-Asn(gtt)[19267,19341]  
 tgatccatagctcaattcggcagagcgcggcactgttaacgggtggtg  
 taggttcaagtcctactgggtcagc  
 >KU199710.1 *Pseudomonas* phage JBD44, complete genome  
 1-1tRNA-Thr(tgt)[6179,6254]  
 gccgggtatggcgcaacaggagcgctgctgattgtaatcagagggtgc  
 gggttcgactcctgctgccgcacca  
 >KX557283.1 *Gordonia* phage Remus, complete genome  
 1-1tRNA-Asn(gtt)[5110,5185]  
 tcgcctgtagctcaattggcagagcaccggctgttaaccggcggttga  
 aggttcgagtccttccaggcagcca  
 1-2tRNA-Lys(ctt)[5187,5260]  
 gcatctgtagctgagtggttagctctgggctctaaccggagacggag  
 gttcgattcctcccagatgcacca  
 1-3tRNA-Gln(ctg)[5262,5334]  
 tccccattcgccaattggtaggacaccggagctcgttcggagatcga  
 ggttcgaatcctcggtaggagc  
 >KX268652.1 *Acinetobacter* phage vB\_AbaS\_TRS1, complete genome  
 1-1tRNA-Arg(tct)[38342,38418]  
 gcgccattcgtctaattggataagacatcataattctagtgtgattgatg  
 tgggttcgagtcctgcatggcgtgccca  
 >KX130668.1 *Enterobacteria* phage vB\_EcoS\_NBD2, complete genome  
 1-1tRNA-Ser(gct)[9424,9511]  
 ggaaggatggcagagaggacgattgcgcggttgctaaccgtgaagccg  
 gaaacggctcaagggttcgaatccctttcttccacca  
 >KU892558.1 *Lactococcus* phage PLgT-1, complete genome  
 1-1tRNA-Met(cat)c[587,660]  
 ggttcttagcttagttggttaaagtcctccgctcataacggagtagcg  
 ctggttcgaatccagcaagaacca  
 1-2tRNA-Lys(ttt)c[24608,24682]  
 gtggctgcatggtcaaggggttaagacactgcacttttaatgcagaggcg  
 tgattcgaatctcactcagtcaca  
 >KX129925.1 *Pseudomonas* phage NP1, complete genome  
 1-1tRNA-Leu(gag)c[11473,11566]

cagaggataccagaccggcggaaccgggaagggtttgagagaagcctctt  
 cggcgaaccggaggccggttacgttcgaatcgatcttgtttgcc  
 >KX636165.1 Mycobacterium phage Gengar, complete genome  
 1-tRNA-Trp(cca)[847,922]  
 tcgcaggtagctcaattggtagagcagcggctctccaaaccgcccgttgc  
 aggttcgagtcctgctctgcgggcca  
 >KX557280.1 Gordonia phage JSwag, complete genome  
 1-tRNA-Asn(gtt)[5142,5217]  
 tcgcctgtagctcaattggcagagcaccggctgttaaccgggcggttga  
 aggttcgagtcctccaggcgagcca  
 1-2tRNA-Lys(ctt)[5219,5292]  
 gcatctgtagctgagtggttagctctgggctcttaaccggagacggag  
 gttcgattcctccagatgcacca  
 1-3tRNA-Gln(ctg)[5294,5366]  
 tccccattcgtccaactggcaggacaccggagtctggtccggagatcga  
 ggttcgaatccttggtggggagc  
 1-4tRNA-Arg(acg)c[49167,49246]  
 tcggttcgctggtcggaaggtgcgactcggctacggtgatccggcga  
 ttgtcccgttcgaggtgtgggaaccgatcc  
 >KX557276.1 Gordonia phage Cucurbita, complete genome  
 1-2tRNA-Trp(cca)[6312,6385]  
 acggacgtagctcaactggtagagcagcggctctccaaaccgcaggttgc  
 aggttcaagtcctgccggccgtgc  
 1-3tRNA-Tyr(gta)[7820,7902]  
 gtgggtgacacaccaatggtggtgtagcgggctgtaacccgtggcggtc  
 tacgcgggcaggttcgatccctgccaccacac  
 1-4tRNA-Ser(cga)[8070,8153]  
 ggagggtatgcccatggtgggcgcgcggtgcgaataccgtatacggta  
 tccattccgggagttcgattcttctaccctccgc  
 1-5tRNA-Ser(gct)[8234,8317]  
 ggcgagctatccggtctgggaccgggccccgttgctagcggacgtgcatc  
 tccgggtgtgaggttcgattcctcagctcgccgc  
 1-6tRNA-Asn(gtt)[8669,8744]  
 tccggtgtagctcaatcggcagagcgtcggctgttaaccgagaggctga  
 aggttcgacccttcaccggagcca  
 1-7tRNA-Lys(ctt)[9298,9373]  
 gcctctgtagctcagttggttagagcaaccgcctttaagcgggtgggtc  
 gcaggttcgaatccttcgggggcac  
 >KX507361.1 Mycobacterium phage Gardann, complete genome  
 1-tRNA-Thr(cgt)[62844,62917]  
 gccaccttagctcagttggtagagcagccccttcgtaacgggcaggtcag  
 cggttcgactccgctaggtggctc  
 1-2tRNA-Pro(tgg)[63139,63213]  
 ctggctgtagctcaacttggtagagcgtggctttgggtgccaggggttg

caggttcaaatcctgctagccagac  
 1-3tRNA-Trp(cca)[63343,63416]  
 agctcggtagctcaattggtagagcagcggctctcaaagccggttcc  
 ccgttcgagtcggggtcgggttc  
 1-4tRNA-Tyr(gta)[63527,63609]  
 gtggtggttgggcttgttggtggcccacgtgactgtaaatcaggcggtt  
 tggcatcgggggttcgattccctcccaccacac  
 1-5tRNA-Leu(tag)[63846,63920]  
 ggccctctagcccaattggcagaggcacaggttttaggtacctgtcagtg  
 cgagttcgagtctcgcgggggccac  
 1-6tRNA-His(gtg)[63921,63990]  
 gcttagtagcctagtggtaaggcagcgggttgatccggtgaacctgag  
 ttcgattctcagctaaagcc  
 1-7tRNA-Gln(ctg)[63995,64069]  
 tgaccggtagcacaaactgtagttgcgccgcgctctggacgcggaggttg  
 ttggttcgatcccagctcggtcagc  
 1-8tRNA-Gly(tcc)[64185,64259]  
 gtgctagtaaccatgttggtgggtgcctgactccactcaggatttcg  
 cgggttcgattcctgtctagcacac  
 1-9tRNA-Lys(ctt)[64302,64379]  
 tgccctgtagctcagttggtagagctcccactcttaacggtaggtca  
 caggttcaagtctgtacgggtaccca  
 1-10tRNA-Cys(gca)[65561,65633]  
 gccgttggtccgagtggttaggtgccaggctgcaaacttggttagtcgc  
 gttcgattcgcggggacggctcc  
 1-11tRNA-Asn(gtt)[65902,65975]  
 tcctccgtagctcaattggcagagcgcgactgtaatcgctggttgg  
 tgggtcgagtcacccgttgagc  
 1-12tRNA-Lys(ttt)[66169,66243]  
 gccctatagctcagttggtagagcaggagacttttaattctcggtcct  
 aggttcgatccctagtgggggcacc  
 >KX557272.1 Gordonia phage Bantam, complete genome  
 1-2tRNA-Met(cat)[46613,46687]  
 gccccggtagctcagtcggttagagccggtcactcataatgactaggtcg  
 caggttcgagccctgccccggggcac  
 >KU963248.1 Gordonia phage Yvonnetastic, complete genome  
 1-1tRNA-Phe(gaa)[6354,6430]  
 cggcgtgtagctcagttaggttaagagcggcggttgaaacccgggaggtt  
 cgtaggttcgatccctaccgcgtcggc  
 1-2tRNA-Asn(gtt)[6541,6616]  
 tccggagtagcttaattggcagagctccaggtgttaccctgatgtagat  
 ataggtcaagtctatctccggagc  
 1-3tRNA-Trp(cca)[6629,6701]  
 taggatctagctcaactggtagagcgggtgtctcaaagccactggtagg

ggttcaagtcctctgtgtcctagc  
 1-4tRNA-Lys(ctt)[6704,6778]  
 gcttccgtagctcagcggttagagcagctgattcttaacagcgggtcg  
 aaggttcaaatccttccgggggcac  
 1-5tRNA-Asp(gtc)[6823,6896]  
 ccttccgtagcttagtggttaaagcactcgcctgtcgagcgaggggacgc  
 gcgttcgaattgcgtcggaggac  
 1-6tRNA-Ser(cga)[7225,7310]  
 ggagagtatgccacgggtggcgcgcggtgtcgaataccgctatacggta  
 aacattccgggggttcaactcctctgctctccgcca  
 1-7tRNA-Ser(gct)[7312,7395]  
 ggcgagatatccagactgggtctgttccccgttctagcgggagggcacc  
 tacgggtgtgggattcgattctcatctcgcgcg  
 >KU761559.1 Mycobacterium phage ArcherNM, complete genome  
 1-1tRNA-Leu(aag)[6231,6344]  
 GCAGCCCGTCGTTTAATCGGCAGGACGGCTGGTGAAGGCGCATAACGCGACGGCTGACGA  
 GTCGTCGGCGTGCCGAAGTACCAGGAGGTGGGGGTTCGACTCCCCCTCGGGCGCA  
 >KU728633.1 Mycobacterium phage Bipper, complete genome  
 1-1tRNA-Met(cat)[32891,32965]  
 gggcggttagctcagtcggttagagccacggactcataatccgttggtcg  
 tgggttcgagccccacccgccctac  
 >KU963245.1 Gordonia phage Hotorobo, complete genome  
 1-1tRNA-Asn(gtt)[20134,20208]  
 tgatccatagctcaattcggcagagcggcgactgttaatcgggtggtg  
 taggttcaagtcctactgggtcagc  
 >KU761558.1 Mycobacterium phage Loser, complete genome  
 1-1tRNA-Trp(cca)[6166,6239]  
 gggcacgtagctcaatcggtagagcagcggtctccaaagccgcaggttcc  
 aggttcgaaccctggcgggctcgc  
 >KU613353.1 Mycobacterium phage Catalina, complete genome  
 1-1tRNA-Glu(ctc)[5907,5979]  
 ggtccgttgagtagcggcaactcatctgactctcactcagaagatcgcg  
 ggttcaaatccgcacggactac  
 >KU985093.1 Mycobacterium phage EvilGenius, complete genome  
 1-1tRNA-Gln(ctg)[4806,4880]  
 tccccgttcgtctaattggcaagacgccgggttctggccccggtaattga  
 ggttcgaatccttgatggggaacca  
 >KU935727.1 Mycobacterium phage Panchino, complete genome  
 1-1tRNA-Thr(ggt)[29167,29244]  
 gatcctacggacgggaaaggacgtactacggtctggtaatccgcaggtc  
 gctggttcgagcccagctgggggcacca  
 >KU695581.1 Mycobacterium phage Mulciber, complete genome  
 1-1tRNA-Trp(cca)[6118,6193]  
 gcgttcctagctcaattggttagagcagcggtctccaaagccgcgggttcc

aggttcgagccctggggaacgtgcc  
 >KU935728.1 Mycobacterium phage Xeno, complete genome  
 1-tRNA-Thr(ggt)[27208,27285]  
 gatcctacggacgggaaaggacgtactacggtctggaatccgcaggtc  
 gctggttcgagcccagctggggcacca  
 >KX017521.1 Salmonella phage 118970\_sal2, complete genome  
 1-tRNA-Met(cat)c[28730,28805]  
 agttagtggcagagtgggtatgcacctccttcatacggagcgactacag  
 tggttcaaatccactactaactacca  
 1-2tRNA-Ile(gat)c[28812,28887]  
 gctctgatagttcaacaggttagaacaggcgaccgataatcgtaaatct  
 tggtcgatcccaagtcggagtacca  
 1-3tRNA-Thr(tgt)c[29257,29331]  
 gctcctaaagcattgctggcgatgcagttgccttgtaagcatctgaaccg  
 ggttcgattcctggtgggagcacca  
 1-4tRNA-Gly(tcc)c[29736,29810]  
 gcgtgattagttcagtggtctagaataactggctccaaccagtagacacg  
 agttcgactctcgtatcccgcacca  
 1-5tRNA-Gln(ttg)c[29818,29893]  
 tggagagtagtgaacggttagcacaacggccttgactccgtaatggt  
 aggttcgattcctccttctccagcca  
 1-6tRNA-Gln(ctg)c[29902,29976]  
 ttgggatgtagatcaattggcagatcgctggcctctgactccgaagggtc  
 cacgttcgatccgtggcatcccagt  
 1-7tRNA-Arg(acg)c[30209,30283]  
 gcgtccttattcaacggaagaatgtaaagctacgaactttacgatcgg  
 ggttcgattccctgaggatgcacca  
 1-8tRNA-His(gtg)c[30290,30366]  
 gtggctatatcataattggttaatgatcctgattgtgaatcaggcctatg  
 tggattcgaattccactagccaccca  
 1-9tRNA-Ser(tga)c[31064,31153]  
 ggaaggtaggacatagtggatgtaacaggtcttgaacacgtcccgcgtg  
 tagcgatatggtgatgggtcgactccattaccttctcca  
 1-10tRNA-Ser(gga)c[31161,31252]  
 ggaagagcaaatcgaatgtgacgaaaaccgttgaaagtggctgactt  
 gttaaagcaggcttgagagttcgaatctcttcttccgcca  
 1-11tRNA-Leu(tag)c[31427,31507]  
 ggggatgtggcgaattggcagacgcgctagatttaggttctagtcttcg  
 ggtgtgggttcgagtcctccatccctacca  
 1-12tRNA-Ala(tgc)c[31753,31828]  
 ggggtcataggttattggttaacttactgccttgcaagcagtggaact  
 cagttcaattctgagtactccacca  
 1-13tRNA-Ala(tgc)c[31834,31912]  
 ggggaatgggtctgcttgagtggaacctcgcttgaccgaggatatca

gaagagttcgaatctcttattctccacca  
1-14tRNA-Val(tac)c[32553,32626]  
gctcggtagtttaatgggagaaccccgctttacacggcggttgcgata  
gttcgattctatcaccgagtacca  
1-15tRNA-Lys(ttt)c[33095,33173]  
agatcgttagctcaattggttagcagcaccggcgtttaaccggaaggt  
tctgggttcgagtcccaggcggctacca  
1-16tRNA-Met(cat)c[33362,33439]  
tgcgggtagatctctggcagagatcgtagtctcataagctagaagag  
gtaggttcgattcctgcaccgcctcca  
1-17tRNA-Pro(tgg)c[33446,33522]  
ctccgattagctcaattggctagagtacaccgtttggggcgggtggggtg  
aagggttcgagtccttcattggagacca  
1-18tRNA-Gly(gcc)c[34054,34127]  
gcgttcgtagttaaagggtataattttggttgccaaccagaagttgagg  
gttcgagtcctccgaccgcacca  
1-19tRNA-Lys(ctt)c[34266,34343]  
gcatctgtagcttagttgatttaaagcaaccgactcttaatcggaagatc  
ctgagttgaatctcagcaggtgtacca  
1-20tRNA-Asp(gtc)c[34901,34977]  
gcgatcggggctggcttggtaatggtactcccctgtcacgggagagaatg  
tgggttcgaatcccatcggtcgcgcca  
1-21tRNA-Asn(gtt)c[35200,35282]  
gggtcgttagccaagcgggttggcgggtgactgtaatccatgttgaaag  
acaacgtaggttcgaatcctacacggcccgcca  
1-22tRNA-Cys(gca)c[35290,35365]  
cgaccgttggctgaatggcttaggcggaggcctgcaaaacctcctatgt  
gagttcgaatctcatcggtcgtcca  
1-23tRNA-Trp(cca)c[36186,36262]  
attcctagagtggtactggacagcatgtcgggtcctcaaaaccgtacggtc  
taggttcgagtcctagtaggttgcca  
1-24tRNA-Glu(ttc)c[36271,36347]  
gtcctgtagacaaactggtaaagtcactaccctttcaaggtaggatttg  
cgggttcgatccccgcacaggacgcca  
1-25tRNA-Tyr(gta)c[36356,36446]  
tgttggattagtatcgtagaggtagcgaagcagactgtaaactgccgac  
tcggaagggtctcgggtggttcgactccatcatccaacatc  
1-26tRNA-Leu(taa)c[37360,37436]  
gggggtgtaatgaattggcataggtactggacttaaaattcaggtttg  
tgggttcgaatcccaccaccctacca  
1-27tRNA-Met(cat)c[38066,38143]  
ggttctcaagctcatttggtatgagccgtcgcctcataagcgaaaggtag  
gtaggttcgaatcctccgggagccacca  
1-28tRNA-Ser(gct)c[38149,38242]

ggaagattaaccctaaaggaaggagctgttgctaaacagccagtagc  
tgtggagacacgggtgccagttcgaatctggcatcttcctcca  
1-29tRNA-Arg(tct)c[43637,43711]  
cgggggttagtctaagggataggcaggagtcttctaaattcctttatgca  
ggttcgaatcctgtcacctcgcca

>KX523699.2 Salmonella phage IME207, complete genome

1-1tRNA-Arg(tct)c[23617,23692]  
acaccattagctcaacggatagacggtagccttctaagctattggtgc  
aggttcgagtcctgcatggtgtgcca  
1-2tRNA-Ser(gct)c[23699,23786]  
ggatagttggctgagaggccgaaagcagtcggttgctaaccgataaaccg  
gaaacggttcacaggttcgaatcctgtactatccgcca

>KU927497.2 Salmonella phage 100268\_sal2, complete genome

1-1tRNA-Met(cat)c[29621,29696]  
agttagttggcagagtggttatgcacctccttcatacggagcgactacag  
tggttcaaatccactactaactacca  
1-2tRNA-Ile(gat)c[29703,29778]  
gctctgatagttcaacaggttagaacaggcgaccgataatcgtcaaatct  
tggttcgatcccaagtcggagtacca  
1-3tRNA-Thr(tgt)c[30148,30222]  
gctcctaaagcattgctggcgatgcagttgccttgtaagcatctgaaccg  
ggttcgattcctggggagcacca  
1-4tRNA-Gly(tcc)c[30627,30701]  
gcggtattagttcagtggttagaataactggctccaaccagtagacacg  
agttcgactctcgtatcccgcacca  
1-5tRNA-Gln(ttg)c[30709,30784]  
tggagagtagtgaacggttagcacaacggccttgactccgtaaatggt  
aggttcgattcctccttccagcca  
1-6tRNA-Gln(ctg)c[30791,30866]  
tgggatgtagatcaattggcagatcgtggcctctgactccgaaggttcc  
acgttcgatccgtggcatcccagcca  
1-7tRNA-Arg(acg)c[31099,31173]  
gcgtccttattcaacggaagaatgtaagctacgaactttacgatcgg  
ggttcgattccctgaggatgcacca  
1-8tRNA-His(gtg)c[31180,31256]  
gtggctatatcataattggttaatgatcctgattgtgaatcaggcctatg  
tggttcgaattccactagccaccca  
1-9tRNA-Ser(tga)c[31953,32042]  
ggaaggtaggacatagtggtatgtaacaggtctgaaaacctgcccgtg  
tagcgatatggtgatggttcgactccattaccttcctcca  
1-10tRNA-Ser(gga)c[32050,32141]  
ggaagagcaaatcgataggtgacgaaaaccgttgaaagtggctgactt  
gttaaagcaggcttgagagttcgaatctcttcttccgcca  
1-11tRNA-Leu(tag)c[32316,32396]



ggggatgtggcgaattggcagacgcgctagatttaggttctagtcttcg  
gggtgggttcgagtcctccatccctacca  
1-12tRNA-Ala(tgc)c[32642,32717]  
ggggcataggttatttggttaaacttactgccttgcaagcagtggaact  
cagttcaattctgagtgactccacca  
1-13tRNA-Ala(tgc)c[32723,32801]  
ggggaatgggtctgcttgagtgacacctcgcttgaccgaggatatca  
gaagagttcgaatctcttattctccacca  
1-14tRNA-Val(tac)c[33442,33515]  
gctcggttagtttaatgggagaacccgctttacacggcggttgcgata  
gttcgattctatcaccgagtacca  
1-15tRNA-Lys(ttt)c[33984,34062]  
agatcgctagctcaattggtttagcagcaccggcttttaaccggaaggt  
tctgggttcgagtcaccggcggtctacca  
1-16tRNA-Met(cat)c[34251,34328]  
tgcgggtagatctctggcagagatcgctagctcataagctagaaagag  
gtaggttcgattcctgcacccgctcca  
1-17tRNA-Pro(tgg)c[34335,34411]  
ctccgattagctcaattggctaggtacaccgtttggggcggtggggttg  
aaggttcgagtccttcattggagacca  
1-18tRNA-Gly(gcc)c[34943,35016]  
gcgttcgtagttaaaggataattttggttgccaaccagaagttgagg  
gttcgagtcctccgaccgcacca  
1-19tRNA-Lys(ctt)c[35155,35232]  
gcatctgtagcttagttgatttaaagcaaccgactcttaacggaagatc  
ctgagttgaatctcagcaggtgtacca  
1-20tRNA-Asp(gtc)c[35790,35866]  
gcgatggggctggcttggtaatggctactcccctgtcacgggagagaatg  
tgggttcgaatcccatcggtcgcgcca  
1-21tRNA-Asn(gtt)c[36089,36171]  
gggtcgtagccaagcggtttggcggtaggactgttaatccatgttgaag  
acaacgtaggttcgaatcctacacggcccgcca  
1-22tRNA-Cys(gca)c[36179,36254]  
cgaccgttggctgaatggcttaggcggaggcctgcaaaacctcctatgt  
gagttcgaatctcatcggtcgtcca  
1-23tRNA-Trp(cca)c[37075,37151]  
attcctagagtgttactggacagcatgtcggtctccaaaccgtacggtc  
taggttcgagtcctagtaggtttgcca  
1-24tRNA-Glu(ttc)c[37160,37236]  
gtcctgtagacaaactggtaaagtcactacccttcaagtaggatttg  
cgggttcgatccccgcacaggacgcca  
1-25tRNA-Tyr(gta)c[37245,37335]  
tgttgattagtagtaggtagcgaagcagactgtaaatctgccgac  
tcggaagggtctcgggtggttcgactccatcatccaacatc

1-26tRNA-Leu(taa)c[38249,38325]  
gggggtgaatcgaattggcataggtactggactaaaattcaggtttg  
tgggttcgaatcccaccaccctacca  
1-27tRNA-Met(cat)c[38955,39032]  
ggttctcaagctcatttggtatgagccgtcgcctcataagcgaaaggtag  
gtagggtcgaatcctccgggagccacca  
1-28tRNA-Ser(gct)c[39038,39131]  
ggaagattaaccctaaagtaaggagctgttgctaaacagccagtagc  
tgtggagacacgggtgccagttcgaatctggcatcttctcca  
1-29tRNA-Arg(tct)c[44526,44600]  
cgggggtgtagtctaagggataggcaggagtcttctaaattcctttatgca  
ggttcgaatcctgtcacctcgcca

>KT337365.1 Streptococcus phage phiARI0746, complete genome

1-1tRNA-Ser(gct)c[18374,18464]  
ggagagttggcagagtcaggttgatcgcccgtttgctagacgggtgat  
cgcttatgtcgggtccgtgggttcaatcccacactctct

>KM236244.1 Salmonella phage Stitch, complete genome

1-1tRNA-Met(cat)c[28496,28569]  
agttagttggcagagcggttatgcacctcttcatacggagtactacag  
tggttcaaatccactactaactac  
1-2tRNA-Ile(gat)c[28576,28651]  
gtccgatagttcaaacggttagaacaggcgaccgataatcgtaaactt  
tggttcgatcccaagtcggagtacca  
1-3tRNA-Thr(tgt)c[29021,29095]  
gtccttaaagcattgctggcgatgcagttgccttgtaagcatctgaaccg  
ggttcgattcctggtgggagcacca  
1-4tRNA-Gly(tcc)c[29501,29575]  
gcggtattagttcagtggttagaataactggctccaaccagtagacacg  
agttcgactctcgatcccgacca  
1-5tRNA-Gln(ttg)c[29582,29657]  
tggagagtagtgaacggtagcacaacggccttgactccgtaatggt  
aggttcgattcctccttctccagcca  
1-6tRNA-Gln(ctg)c[29664,29739]  
tgggatgtagatcaattggcagatcgtcggccttgactccgaaggttcc  
acgttcgatccgtggcatcccagcca  
1-7tRNA-Arg(acg)c[29972,30046]  
gcgtccttatttcaatggaaagaatgtaaagctacgaactttacgatcgg  
ggttcgattccctgaggatgcacca  
1-8tRNA-His(gtg)c[30053,30129]  
gtggctatatcataattggttaatgatcctgatttgaatcaggcctatg  
tggattcgaattccactagccaccca  
1-9tRNA-Ser(tga)c[30488,30577]  
agaagataggacgtagtggtacgtaaccggtcttgaaaaccggcccgtg  
tagtgatatggtgatggttcgactccattatcttctgcca

1-10tRNA-Ser(gga)c[30955,31044]  
ggaagagcaaatacgcgataggtagcagaaaccgcttggaagtggctgactg  
gtaaaacggcttgagagttcgaatctctcttccgcca  
1-11tRNA-Leu(tag)c[31219,31299]  
ggggatgtggcgaattggcagacgcgctagatttaggttctagcttcg  
gggtgggttcgagtcctccatccctacca  
1-12tRNA-Ala(tgc)c[31545,31620]  
ggggcataggttatttggttaaacttactgccttgcaagcagtggaact  
cagttcaattctgagtactccacca  
1-13tRNA-Ala(tgc)c[31626,31704]  
ggggaatgggtctgcttgagtgacacctcgctgcaccgaggatatca  
gaagagttcgaatctctattctccacca  
1-14tRNA-Val(tac)c[32367,32440]  
gctcggtagtttaattgggagaacccgctttacacggcgggtgcgata  
gttcgattctatcaccgagtacca  
1-15tRNA-Lys(ttt)c[32909,32987]  
agatcgcctagctcaattggtttagtagcaccggctttaaccggaaggt  
tctgggttcgagtcacggcgggtctacca  
1-16tRNA-Met(cat)c[33176,33253]  
tcggggttagatctctggtagagatcgcctagctcataagctagaaagag  
gtaggttcgattctacacccgcttcca  
1-17tRNA-Pro(tgg)c[33260,33337]  
ctccgttagctcagtttggccagagcgttccgttggggcggtagggtc  
gggggttcaaatacctcccacggagacca  
1-18tRNA-Gly(gcc)c[33757,33830]  
gcgttcgtagttaaaggtataattttggttgccaaccagaagttgagg  
gttcgattccctccgaccgacca  
1-19tRNA-Lys(ctt)c[34044,34119]  
acatccatagctcaatggttagagctaccgcctcttaagcggaggggtct  
aggttcaagtcctagtggtgtacca  
1-20tRNA-Asp(gtc)c[34196,34272]  
gcgatcggggctggcttggtaatggtactcccctgtcacgggagagaatg  
tgggttcgaatcccatcggtcgcgcca  
1-21tRNA-Asn(gtt)c[34571,34653]  
gggtcgtagccaagtggtttggcggtagctgttaatccatgtcgaaag  
acaacgtaggttcgaatcctacacggcccgcga  
1-22tRNA-Cys(gca)c[34661,34736]  
cgaccgttggtgaatggcttaggcggaggcctgcaaaacctcttatgt  
gagttcgaatctcatcggtcgtcca  
1-23tRNA-Trp(cca)c[35557,35633]  
attcctagagtgttactggacagcatgtcgggtcctcaaaaccgtacggtc  
taggttcgagtcctagtaggttgcca  
1-24tRNA-Glu(ttc)c[35642,35718]  
gtcctgtagacaaactggtaaagtcactacccttcaaggtaggatttg

cggttcgatccccgcacaggacgcca  
1-25tRNA-Tyr(gta)c[35726,35816]  
gttgattagtagtagaggttagcgaagcagactgtaaatctgccgact  
cgaaagggtctcgggtggttcgactccatcatccaacacca  
1-26tRNA-Leu(taa)c[36731,36807]  
gggggtgtaatcgaattggcataggtactggacttaaaattcaggtttg  
tgggttcgaatcccaccaccctacca  
1-27tRNA-Met(cat)c[37359,37436]  
ggttctcaagctcatttggtatgagccgtcgcctcataagcgaaaggtag  
gtaggttcgaatcctccgggagccacca  
1-28tRNA-Ser(gct)c[37442,37535]  
ggaagattaaccctaaagtaaggagctgttgtaaacagccagtagc  
tgtggagacaggtgtgccagttcgaatctggcatcttcctcca  
1-29tRNA-Arg(tct)c[42928,43002]  
cggggtgtagtctaaggataggcaggagtcttctaaattcctttatgca  
ggttcgaatcctgtcacctcggcca

>JQ740791.1 Lactococcus Phage ASCC287, complete genome

1-tRNA-Trp(cca)[31764,31836]  
tgcgagcatagtagtggaatgctacagattccaaacctgtaaacgtg  
ggttcgattcctgctgttcgtgt  
1-2tRNA-Pro(tgg)[31890,31961]  
caggatatggtgtcaatggtagcatgcgtgtttgggaacatgtggtgtt  
ggttcgagtcagctatcctga

>JQ740793.1 Lactococcus Phage ASCC324, complete genome

1-tRNA-Trp(cca)[31460,31532]  
tgcgagcatagtagtggaatgctacagattccaaacctgtaaacgtg  
ggttcgattcctgctgttcgtgt  
1-2tRNA-Pro(tgg)[31586,31657]  
caggatatggtgtcaatggtagcatgcgtgtttgggaacatgtggtgtt  
ggttcgagtcagctatcctga

>JQ740794.1 Lactococcus Phage ASCC337, complete genome

1-tRNA-Trp(cca)[31458,31530]  
tgcgagcatagtagtggaatgctacagattccaaacctgtaaacgtg  
ggttcgattcctgctgttcgtgt  
1-2tRNA-Pro(tgg)[31584,31655]  
caggatatggtgtcaatggtagcatgcgtgtttgggaacatgtggtgtt  
ggttcgagtcagctatcctga

>JQ740798.1 Lactococcus Phage ASCC368, complete genome

1-tRNA-Trp(cca)[31459,31531]  
tgcgagcatagtagtggaatgctacagattccaaacctgtaaacgtg  
ggttcgattcctgctgttcgtgt  
1-2tRNA-Pro(tgg)[31585,31656]  
caggatatggtgtcaatggtagcatgcgtgtttgggaacatgtggtgtt  
ggttcgagtcagctatcctga

>JQ740799.1 Lactococcus Phage ASCC395, complete genome

1-tRNA-Trp(cca)[31422,31494]

tgcgagcatagtatagtggaatgctacagattccaaacctgtaaacgtg

ggttcgattcctgctgttcgtgt

1-2tRNA-Pro(tgg)[31548,31619]

caggatatgggtgcaatggtagcatgcgtgttttgggaacatgtggtgtt

ggttcgagtcagctatcctga

>JQ740800.1 Lactococcus Phage ASCC397, complete genome

1-tRNA-Trp(cca)[31424,31496]

tgcgagcatagtatagtggaatgctacagattccaaacctgtaaacgtg

ggttcgattcctgctgttcgtgt

1-2tRNA-Pro(tgg)[31550,31621]

caggatatgggtgcaatggtagcatgcgtgttttgggaacatgtggtgtt

ggttcgagtcagctatcctga

>JQ740801.1 Lactococcus Phage ASCC406, complete genome

1-tRNA-Trp(cca)[31362,31434]

tgcgagcatagtatagtggaatgctacagattccaaacctgtaaacgtg

ggttcgattcctgctgttcgtgt

1-2tRNA-Pro(tgg)[31488,31559]

caggatatgggtgcaatggtagcatgcgtgttttgggaacatgtggtgtt

ggttcgagtcagctatcctga

>JQ740802.1 Lactococcus Phage ASCC454, complete genome

1-tRNA-Trp(cca)[31766,31838]

tgcgagcatagtatagtggaatgctacagattccaaacctgtaaacgtg

ggttcgattcctgctgttcgtgt

1-2tRNA-Pro(tgg)[31892,31963]

caggatatgggtgcaatggtagcatgcgtgttttgggaacatgtggtgtt

ggttcgagtcagctatcctga

>JQ740803.1 Lactococcus Phage ASCC460, complete genome

1-tRNA-Trp(cca)[31425,31497]

tgcgagcatagtatagtggaatgctacagattccaaacctgtaaacgtg

ggttcgattcctgctgttcgtgt

1-2tRNA-Pro(tgg)[31551,31622]

caggatatgggtgcaatggtagcatgcgtgttttgggaacatgtggtgtt

ggttcgagtcagctatcctga

>JQ740806.1 Lactococcus Phage ASCC476, complete genome

1-tRNA-Trp(cca)[31425,31497]

tgcgagcatagtatagtggaatgctacagattccaaacctgtaaacgtg

ggttcgattcctgctgttcgtgt

1-2tRNA-Pro(tgg)[31551,31622]

caggatatgggtgcaatggtagcatgcgtgttttgggaacatgtggtgtt

ggttcgagtcagctatcctga

>JQ740809.1 Lactococcus Phage ASCC502, complete genome

1-tRNA-Trp(cca)[31458,31530]

tgcgagcatagtatagtggaatgctacagattccaaacctgtaaacgtg  
 gggtcgattcctgctgttcgtgt  
 1-2tRNA-Pro(tgg)[31584,31655]  
 caggatatgggtgcaatggtagcatgcgtgtttgggaacatgtggtgtt  
 gggtcgagtcagctatcctga  
 >JQ740810.1 Lactococcus Phage ASCC506, complete genome  
 1-1tRNA-Trp(cca)[31432,31504]  
 tgcgagcatagtatagtggaatgctacagattccaaacctgtaaacgtg  
 gggtcgattcctgctgttcgtgt  
 1-2tRNA-Pro(tgg)[31558,31629]  
 caggatatgggtgcaatggtagcatgcgtgtttgggaacatgtggtgtt  
 gggtcgagtcagctatcctga  
 >JQ740811.1 Lactococcus Phage ASCC527, complete genome  
 1-1tRNA-Trp(cca)[31528,31600]  
 tgcgagcatagtatagtggaatgctacagattccaaacctgtaaacgtg  
 gggtcgattcctgctgttcgtgt  
 1-2tRNA-Pro(tgg)[31654,31725]  
 caggatatgggtgcaatggtagcatgcgtgtttgggaacatgtggtgtt  
 gggtcgagtcagctatcctga  
 >JQ740814.1 Lactococcus Phage ASCC544, complete genome  
 1-1tRNA-Trp(cca)[31458,31530]  
 tgcgagcatagtatagtggaatgctacagattccaaacctgtaaacgtg  
 gggtcgattcctgctgttcgtgt  
 1-2tRNA-Pro(tgg)[31584,31655]  
 caggatatgggtgcaatggtagcatgcgtgtttgggaacatgtggtgtt  
 gggtcgagtcagctatcctga  
 >KC522412.1 Lactococcus phage CaseusJM1, complete genome  
 1-1tRNA-Trp(cca)[30292,30364]  
 tgcgaacatagtatagtggaatgctacagattccaaacctgtaaacgtg  
 gggtcgattcctgctgttcgtgt  
 >KC182544.1 Lactococcus phage 936, complete genome  
 1-1tRNA-Trp(cca)[26500,26570]  
 gcgaacatagtataatgggaatgctacagattccaaacctgtaaacgtgg  
 gttcgattcctactgttcgtg  
 1-2tRNA-Pro(tgg)[26640,26711]  
 caggatatagtgttaatggtagcatgcgtgtttgggaacatgtagtgtt  
 gggtcgagtcagctatcctga  
 >KC182545.1 Lactococcus phage fd13, complete genome  
 1-1tRNA-Trp(cca)[29914,29986]  
 tgcgagcatagtataatgggaatgctacagattccaaacctgtaaacgtg  
 gggtcgattcctactgttcgtgt  
 1-2tRNA-Pro(tgg)[30040,30111]  
 caggatatgggtgtaatggtagcatgcgtgtttgggaacatgtggtgtt  
 gggtcgagtcagctatcctga

>KF676640.1 Lactococcus phage SK1833, complete genome  
1-tRNA-Trp(cca)[27505,27577]  
tcgagcatagtagtataatggtaatgctacagattccaaacctgtaaacgtg  
ggttcgattcctactgttcgtgt

>KM091442.1 Lactococcus phage phi15, complete genome  
1-tRNA-Trp(cca)[31645,31717]  
tcggaacatagtagtggtaatgctacagattccaaacctgtaaacgtg  
ggttcgattcctactgttcgtgt

>KP793104.1 Lactococcus phage 936 group phage PhiB1127, complete genome  
1-tRNA-Pro(tgg)[28578,28649]  
caggatatgggtgcaatggtagcatgcgtgttttgtaacatgtggtgt  
ggttcgagtcagctatcctga

>KP793105.1 Lactococcus phage 936 group phage Phi19.3, complete genome  
1-tRNA-Trp(cca)[28469,28541]  
tcgagcatagtagtggtaatgctacagattccaaacctgtaaacgtg  
ggttcgattcctactgttcgtgt

>KP793107.1 Lactococcus phage 936 group phage PhiD.18, complete genome  
1-tRNA-Trp(cca)[28243,28315]  
tcgagcatagtagtggtaatgctacagattccaaacctgtaaacgtg  
ggttcgattcctactgttcgtgt  
1-2tRNA-Asp(gtc)[28321,28392]  
taggatatagccaaattggtatatggtaggcagagtcgcaatctggtact  
ggttcgattccagttgtcctag

>KP793109.1 Lactococcus phage 936 group phage PhiC0139, complete genome  
1-tRNA-Pro(tgg)[28825,28896]  
caggatatgggtgcaatggtagcatgcgtgttttgtaacatgtggtgt  
ggttcgagtcagctatcctga

>KP793110.1 Lactococcus phage 936 group phage Phi43, complete genome  
1-tRNA-Asp(gtc)[28891,28962]  
taggatatagccaaattggtatatggtaggcagagtcgcaatctggtact  
ggttcgattccagttgtcctag

>KP793112.1 Lactococcus phage 936 group phage Phi129, complete genome  
1-tRNA-Trp(cca)[29072,29144]  
tcgagcatagtagtggtaatgctacagattccaaacctgtaaacgtg  
ggttcgattcctactgttcgtgt  
1-2tRNA-Asp(gtc)[29150,29221]  
taggatatagccaaattggtatatggtaggcagagtcgcaatctggtact  
ggttcgattccagttgtcctag

>KP793113.1 Lactococcus phage 936 group phage PhiF.17, complete genome  
1-tRNA-Trp(cca)[29680,29752]  
tcgagcatagtagtggtaatactacagattccaaacctgtaaacgtg  
ggttcgattcctactgttcgtgt  
1-2tRNA-Ser(tga)[29810,29896]  
gggagtttgctcaagtcgtgtaagaggttagtcttgaaaactaatgggc

gcttatgcgtgcaagggttcgaatcccttagcttcct  
1–3tRNA–Pro(tgg)[29951,30022]  
caggatatggtgtaatggtagcatgcgtgtttgggaacatgtggtgt  
ggttcaagtcagctatcctga

>KP793115.1 Lactococcus phage 936 group phage Phi114, complete genome  
1–1tRNA–Trp(cca)[30189,30261]  
tcgaaacatagtagtggaatgctacagattccaaacctgtaaacgtg  
ggttcgattcctactgttcgtgt

>KP793116.1 Lactococcus phage 936 group phage Phi13.16, complete genome  
1–1tRNA–Trp(cca)[30235,30307]  
tcgagcatagtagtggaatgctacagattccaaacctgtaaacgtg  
ggttcgattcctactgttcgtgt

>KP793117.1 Lactococcus phage 936 group phage PhiG, complete genome  
1–1tRNA–Trp(cca)[29954,30026]  
tcgagcatagtagtggaataactacagattccaaacctgtaaacgtg  
ggttcgattcctactgttcgtgt  
1–2tRNA–Ser(tga)[30084,30170]  
gggagtttactcaagctcggtaaagaggttagcttgaaaactaatgggc  
gcttatgcgtgcaagggttcgaatcccttagcttcct

>KP793118.1 Lactococcus phage 936 group phage PhiF0139, complete genome  
1–1tRNA–Trp(cca)[29688,29760]  
tcgagcatagtagtggaataactacagattccaaacctgtaaacgtg  
ggttcgattcctactgttcgtgt  
1–2tRNA–Ser(tga)[29818,29904]  
ggaagtttgctcaagctcggtaaagaggttagcttgaaaactaatgggc  
gcttatgcgtgcaagggttcgaatcccttagcttcct  
1–3tRNA–Pro(tgg)[29959,30030]  
caggatatggtgtaatggtagcatgcgtgtttgggaacatgtggtgt  
ggttcaagtcagctatcctga

>KP793123.1 Lactococcus phage 936 group phage Phi4.2, complete genome  
1–1tRNA–Trp(cca)[30519,30591]  
tcgagcatagtagtggaatgctacagattccaaacctgtaaacgtg  
ggttcgattcctgctgttcgtgt  
1–3tRNA–Pro(tgg)[30774,30845]  
caggatatagtgtaatggtagcatgcgtgtttgggaacatgtagtgt  
ggttcgagtcagctatcctga

>KP793124.1 Lactococcus phage 936 group phage Phi44, complete genome  
1–1tRNA–Trp(cca)[31036,31108]  
tcgaaacatagtagtggaatgctacagattccaaacctgtaaacgtg  
ggttcgattcctactgttcgtgt

>KP793129.1 Lactococcus phage 936 group phage PhiJF1, complete genome  
1–1tRNA–Trp(cca)[31054,31126]  
tcgagcatagtagtggaataactacagattccaaacctgtaaacgtg  
ggttcgattcctactgttcgtgt



1-2tRNA-Ser(tga)[31184,31270]  
 gggagtttactcaagctcggtaaagaggttagtcttgaaaactaatgggc  
 gcttatgcgtgcaagggtcgaatcccttagcttcct

1-3tRNA-Pro(tgg)[31325,31396]  
 caggatatgggttaatggtagcatgcgtgtttgggaacatgtggtgt  
 ggttcaagtcagctatcctga

>KP793131.1 Lactococcus phage 936 group phage PhiE1127, complete genome  
 1-1tRNA-Leu(gag)[31636,31707]  
 taggacatagccaaattggtagtggttagtcagagtcgcaatctggtact  
 ggttcgattccagttgtcctag

>KP793132.1 Lactococcus phage 936 group phage PhiM1127, complete genome  
 1-1tRNA-Leu(gag)[32065,32136]  
 taggacatagccaaattggtagtggttagtcagagtcgcaatctggtact  
 ggttcgattccagttgtcctag

>KP793111.1 Lactococcus phage 936 group phage Phi19.2, complete genome  
 1-1tRNA-Trp(cca)[29642,29714]  
 tgcgagcatagtagtggtaatgctacagattccaaacctgtaaacgtg  
 ggttcgattcctactgttcgtgt

>KU578077.1 Mycobacterium phage Marie, complete genome  
 1-1tRNA-Asn(gtt)[3838,3913]  
 tgatctgtagctcaactggcagagcacccggctgttaaccgggtcgttgg  
 aggttcgagtcctcccagatcagcca  
 1-2tRNA-Trp(cca)[3954,4028]  
 aggcacgtagctcaattggtcagagcagcggctcctccaaagccgccggctg  
 cagggttcgagtcctgccgtgtctgc  
 1-3tRNA-Leu(cag)[4063,4137]  
 ggctcggtaggcaaacaggcaaagccgcctgtctcaggaacaggtgcgtg  
 agggttcgactccctcccagctac

>KU984914.1 Mycobacterium phage Malinsilva, complete genome  
 1-1tRNA-Asn(gtt)[3832,3907]  
 tgatctgtagctcaatcggcagagcacccggctgttaaccgggacgttgg  
 aggttcgagtcctcccagatcagcca  
 1-2tRNA-Trp(cca)[3948,4022]  
 aggcacgtagctcaattggtcagagcagcggctcctccaaagccgccggctg  
 cagggttcgagtcctgccgtgtctgc  
 1-3tRNA-Leu(cag)[4057,4131]  
 ggctcggtaggcaaacaggcaaagccgcctgtctcaggaacaggtgcgtg  
 agggttcgactccctcccagctac

>KU985091.1 Mycobacterium phage Hercules11, complete genome  
 1-1tRNA-Asn(gtt)[3847,3922]  
 tgatctgtagctcaactggcagagcacccggctgttaaccgggtcgttgg  
 aggttcgagtcctcccagatcagcca  
 1-2tRNA-Trp(cca)[3963,4037]  
 aggcacgtagctcaattggtcagagcagcggctcctccaaagccgccggctg

caggttcgagtctgccgtgtctgc  
 1–3tRNA–Leu(cag)[4072,4146]  
 ggctcggtaggcaaacaggcaaagccgcctgtctcaggaacaggtgcgtg  
 agggttcgactccctcccgagctac  
 >KX507362.1 Mycobacterium phage Aglet, complete genome  
 1–1tRNA–Asn(gtt)[3841,3916]  
 tgatctgtagtcaatcggcagagcaccgcgctgtaaccgggacgttgg  
 aggttcgagtctcccagatcagcca  
 1–2tRNA–Trp(cca)[3957,4031]  
 aggcacgtagtcaattggcagagcagcggctccaagccgccggctg  
 caggttcgagtctgccgtgtctgc  
 1–3tRNA–Leu(cag)[4066,4140]  
 ggctcggtaggcaaacaggcaaagccgcctgtctcaggaacaggtgcgtg  
 agggttcgactccctcccgagctac  
 >JF704114.1 Mycobacterium phage Vix, complete genome  
 1–1tRNA–Asn(gtt)[3920,3995]  
 tgatctgtagtcaatcggcagagcaccgcgctgtaaccgggacgttgg  
 aggttcgagtctcccagatcagcca  
 1–2tRNA–Trp(cca)[4036,4110]  
 aggcacgtagtcaattggcagagcagcggctccaagccgccggctg  
 caggttcgagtctgccgtgtctgc  
 1–3tRNA–Leu(cag)[4145,4219]  
 ggctcggtaggcaaacaggcaaagccgcctgtctcaggaacaggtgcgtg  
 ggggttcgactccctcccgagctac  
 >KP027202.1 Mycobacterium phage Taurus, complete genome  
 1–1tRNA–Asn(gtt)[3838,3913]  
 tgatctgtagtcaactggcagagcaccgcgctgtaaccgggtcgttgg  
 aggttcgagtctcccagatcagcca  
 1–2tRNA–Trp(cca)[3954,4028]  
 aggcacgtagtcaattggcagagcagcggctccaagccgccggctg  
 caggttcgagtctgccgtgtctgc  
 1–3tRNA–Leu(cag)[4063,4137]  
 ggctcggtaggcaaacaggcaaagccgcctgtctcaggaacaggtgcgtg  
 agggttcgactccctcccgagctac  
 >KX397373.1 Erwinia phage vB\_EamM\_Stratton, complete genome  
 1–1tRNA–Trp(cca)[869,944]  
 aggggtatagttcaattggtagagcaccggtctccaaaaccgggtgttgg  
 gggttcgagtccctctgcccctgcca  
 1–2tRNA–Cys(gca)[1598,1673]  
 ggggcaatggctcgagcggtaggcgacgaattgcaaattcggatcaggt  
 cggttcaagtcggcttgcccctcca  
 1–3tRNA–Gly(ccc)[3358,3433]  
 gcgagtatagctcagctggtagagcttctggttcccaaccagacggctcgt  
 gaggttcgaatctcattgctcgtcca

1-4tRNA-Tyr(gta)[3543,3628]  
 ggcgcggtactcaagtggtcaacgagacagactgtaaactgttgcctt  
 cgggcttcgtaggttcaaactcctccctcgccacca  
 1-5tRNA-Glu(ttc)[3635,3709]  
 gttcctgtcgtctagtggttaaggacacctggtttcaaccaggcaaccgg  
 agttcaattctccgcaggaacgcca  
 1-6tRNA-Asp(gtc)[3866,3943]  
 aggattgtagctcagttggtctagagtcgcgccctgtcacggcgagggtc  
 gcgggttcgagccccgtcagtcctgccca  
 1-7tRNA-Ile(gat)[3953,4028]  
 tgcgtcttagctcagttggtagagcgacccctgataagggtgaggtcac  
 tggttcaagtcagtagatgcaacca  
 1-8tRNA-Met(cat)[4035,4110]  
 ggttctgtagcttagctggtagagcacgccactcataatggcgcggtcgt  
 tggttcgaatccagccagaaccacca  
 1-9tRNA-His(gtg)[4119,4195]  
 gtgtatgtagttcagctggttagaatactggcttgacgtcagtggtcg  
 agagttcgagtcctccatacacccca  
 1-10tRNA-Ser(gct)[4201,4290]  
 ggagaattgtccgagaggcttaaagagctcccctgtaaggagtggtgg  
 cggagctgcccgtgtgttcgaatcacacattctccgccca  
 1-11tRNA-Met(cat)[4488,4563]  
 gagcgatgctgttaagatggttaacccccgactcataatcgatattcgc  
 aggttcgattcctgtcatcgttcgcc  
 1-12tRNA-Asn(gtt)[4571,4647]  
 ggttccatagctcagttggttagagcggctgcctgttaagcagtaggtcc  
 ctggttcgagtcaggtggtaccgcca  
 >JF957057.1 Mycobacterium phage BPBiebs31, complete genome  
 1-1tRNA-Trp(cca)[2415,2490]  
 tggctcttagctcaatttggtagagcagcggtctccaaaaccgcccgttg  
 caggttcgagtcctgcagagtcagcc  
 >JF957058.1 Mycobacterium virus Heldan, complete genome  
 1-1tRNA-Trp(cca)[3881,3954]  
 aggcgcgtagctcaattggttagagcagcggtctccaaagccgctgctgc  
 aggttcgagtcctgccgcgtctgc  
 >JF957059.1 Mycobacterium phage Optimus, complete genome  
 1-1tRNA-Gly(tcc)[94272,94344]  
 gcgcttgggtcgagttggaagactcctggcttccaccaggttatgca  
 gggttcgagtcctgtcgagcgctc  
 >JF937090.1 Mycobacterium phage Baka, complete genome  
 1-1tRNA-Gly(tcc)[95829,95901]  
 gcgcttgggtcgagttggaagactcctggcttccaccaggttatgca  
 gggttcgagtcctgtcgagcgctc  
 >JF937091.1 Mycobacterium phage Bask21, complete genome

1-tRNA-Arg(cct)[61437,61520]  
atggcccgtagctcagtcaggtagagcagccttggcccttgcgggcttgg  
ttcgtccccgggtcaaatccgggcgggccttacc  
1-2tRNA-Gly(tcc)[61523,61595]  
gcgcccgtggtcgaattggaaagactcctggcttccaccaggttatgca  
ggttcgagtcctgtcgggcgctc

>JF937092.1 Mycobacterium phage DaVinci, complete genome

1-tRNA-Asn(gtt)[5403,5475]  
tgacgttagctcaatggcagagcaccggctgttaaccggacggttgaa  
ggttcgagtcctccatgtcagc  
1-2tRNA-Trp(cca)[5480,5553]  
gcgctcctagctcaattggtagagcagcggctccaaagccgcgagttcc  
aggttcgagtcctggggagcgtgc  
1-3tRNA-Gln(ctg)[5595,5667]  
tccctgttcgtctaatacggaagacaccgggctctggacccggcaatcga  
ggttcgagtccttgatggggagc

>JF937094.1 Mycobacterium virus Hammer, complete genome

1-tRNA-Asn(gtt)[5396,5468]  
tggcgttagctcaatggcagagcccccggctgttaaccgggtggttgaa  
ggttcgagtcctccatgccagc  
1-2tRNA-Trp(cca)[5472,5545]  
gcgttcctagctcaattggtagagcagcggctccaaagccgcgagttcc  
aggttcgaatcctggggagcgtgc  
1-3tRNA-Gln(ctg)[5587,5659]  
tccctgttcgtctaatacggaagacaccgggctctggacccggtaatcga  
ggttcgagtccttgatggggagc

>JF937101.1 Mycobacterium phage LittleE, complete genome

1-tRNA-Tyr(gta)[95026,95098]  
tggcccgtagctcaattggcagagcagccggcgtaattcggcgcgtctc  
ggttcgagtcgggcgggctacc

>JN006062.1 Mycobacterium phage Rakim, complete genome

1-tRNA-Arg(cct)[62326,62409]  
aagcccgtagctcagtcaggtagagcagccttggcccttgcgggcttgg  
ttcgtccccgggtcaaatccgggcgggccttacc  
1-2tRNA-Gly(tcc)[62412,62484]  
gcgcccgtggtcgaattggaaagactcctggcttccaccaggttataca  
ggttcgagtcctgtcgggcgctc

>JF937096.1 Mycobacterium phage Henry, complete genome

1-tRNA-Arg(cct)[62394,62477]  
atggcccgtagctcagtcaggtagagcagccttggcccttgcgggcttgg  
ttcgtccccgggtcaaatccgggcgggccttgcc  
1-2tRNA-Gly(tcc)[62480,62552]  
gcgcccgtggtcgaattggaaagactcctggcttccaccaggttatgca  
ggttcgagtcctgtcgggcgctc

>JN049605.1 Mycobacterium virus Erich, complete genome

1-tRNA-Asn(gtt)[5403,5475]

tgacgtgtagctcaatggcagagcacccggctgtaaccggacggttgaa  
ggttcgagtccttccatgtcagc

1-2tRNA-Trp(cca)[5480,5553]

gcgctcctagctcaattggtagagcagcggctctcaaagccgcgagttcc  
aggttcgagtcctggggagcgtgc

1-3tRNA-Gln(ctg)[5595,5667]

tcctgttcgtctaatacggtgaagacacccgggctctggacccggcaatcga  
ggttcgagtccttgatggggagc

>JN083852.1 Mycobacterium virus Benedict, complete genome

1-tRNA-Trp(cca)[4137,4210]

gggtcagtagctcaactggtagagcagcggctctcaaagccgcgcttg  
aggttcgagccctccctggcctgc

>JN083853.1 Mycobacterium phage Airmid, complete genome

1-tRNA-Trp(cca)[4135,4208]

gggtcagtagctcaatcggtagagcagcggctctcaaagccgcgcttg  
aggttcgagtcctccctggcctgc

>JN185608.1 Mycobacterium phage JAWS, complete genome

1-tRNA-Trp(cca)[1003,1076]

gggtgtgtagctcaatcggtagagcagcggctctcaaagccgcgcttg  
acgttcgagtcgtgccgcgccgc

>JN391441.1 Mycobacterium phage Elph10, complete genome

1-tRNA-Arg(cct)[61875,61958]

atggcccgtagctcagtcaggtagagcagccttggcccttgcgggcttgg  
ttcgtccccgggtcaaatccggcgggccttgcc

1-2tRNA-Gly(tcc)[61961,62033]

gcgccccgtggtcgaattggaaagactcctggcttccaccaggttatgca  
ggttcgagtcctgtcgggcgctc

>JN408459.1 Mycobacterium virus Cuco, complete genome

1-tRNA-Trp(cca)[4309,4382]

gggtcagtagctcaattggtagagcagcggctctcaaagccgcgagttg  
aggttcgagtcctccctggcccg

>JX262376.1 Streptomyces phage phiELB20, complete genome

1-tRNA-Phe(gaa)[1083,1156]

gggccggtagctcagttggaagagcggcgagtgaaatccgcaggtcgc  
aggttcgagtcctgcctggccac

>JN412590.1 Mycobacterium phage Eureka, complete genome

1-tRNA-Arg(cct)[63002,63085]

atggcccgtagctcagtcaggtagagcagccttggcccttgcgggcttgg  
ttcgtccccgggtcaaatccggcgggccttgcc

1-2tRNA-Gly(tcc)[63088,63160]

gcgccccgtggtcgaattggaaagactcctggcttccaccaggttatgca  
ggttcgagtcctgtcgggcgctc

>KR997933.1 Mycobacterium phage Madruga, complete genome  
1-tRNA-Gln(ttg)[56447,56519]  
tgccatcatggtgtaattggcagcacgagtggtttgtccacttagttca  
ggttcgagtcctggtgaggcagc

>KU716094.1 Mycobacterium phage Eidsmoe, complete genome  
1-tRNA-Glu(ctc)[5936,6008]  
ggccgttgtagtagcgcaactcatctgactctcactcagaagatcgcg  
ggttcaaattcccgacggactac

>JN699019.1 Mycobacterium virus Jeffabunny, complete genome  
1-tRNA-Asn(gtt)[5402,5474]  
tgacgttagctcaatggcagagcacccggctgtaaccggacggttgaa  
ggttcgagtccttccatgtcagc  
1-2tRNA-Trp(cca)[5479,5552]  
gcgctctagctcaattggtagagcagcggtctccaaagccgcgagttcc  
aggttcgagtcctggggagcgtgc  
1-3tRNA-Gln(ctg)[5594,5666]  
tcctgttcgtctaatacggaagacaccgggctctggacccggcaatcga  
ggttcgagtccttgatggggagc

>JN831654.1 Mycobacterium virus Saintus, complete genome  
1-tRNA-Lys(ctt)[4070,4143]  
ggggcagtagctcagtcggtagagctacggactcttaatccgcaggtcgc  
aggttcgatccctgcctgccccac

>JN600672.1 Mycobacterium phage Fezzik, complete genome  
1-tRNA-Leu(caa)[34724,34807]  
gtgtccatgcgcggttatcgggcgattagtcaagcctggtccgatga  
ctaagcagtcgggttcgattccggagtatcgcg  
1-2tRNA-Leu(caa)[61695,61769]  
ggtcctgtaggcaaattggcaaagccgcgtcactcaaaatgacgtgtctg  
tgggttcgagtcaccacgggactac  
1-3tRNA-Thr(cgt)[61770,61844]  
gctgccttagctcagatggctagagcgccgctctcgtaaagcggaggtcg  
cgggttcgaggcccgaggcagctc  
1-4tRNA-Lys(ctt)[62131,62204]  
gcctcgtagctcagttggtagagctgccgactcttaatcggtaggtcgc  
aggttcaagtcctgcacgggtac  
1-5tRNA-Tyr(gta)[62215,62298]  
gcgtcggaggtacgtgttggttggtacacctgcctgtaaagcaggcgct  
tcggcttcgggggttcgattccctcccgcgctac  
1-6tRNA-Trp(cca)[62308,62381]  
agctcggtagctcaattggtagagcagcggtctccaaagcgtgggttcc  
ccgttcgagtcggggccgggttc  
1-7tRNA-Leu(tag)[62382,62456]  
ggaactgtaggcaaactggaaaagccgcctgacttaggatcaggtgttg  
cgagttcgactctcgccagttctac

1-8tRNA-His(gtg)[62457,62526]  
 gctaagtagcttaatggtaaagcggcccggtgtggccggggtgattccgg  
 ttcgattccgggcttaagcc  
 1-9tRNA-Cys(gca)[63704,63777]  
 gccgctgtggccgagtggttaggcaccggcctgcaaagccggttagtccg  
 gttcgattccggaggcggtcca  
 1-10tRNA-Lys(ttt)c[64058,64132]  
 gcccctatagctcagttggttagctatcgcttttaagcgacaggtcgc  
 aggttcgagtcctgctgggggcacc  
 >JQ740788.1 Lactococcus Phage ASCC273, complete genome  
 1-tRNA-Trp(cca)[31765,31837]  
 tgcgagcatagtatagtgtaatgctacagattccaaacctgtaaacgtg  
 gtttcgattcctgctgttcgtgt  
 1-2tRNA-Pro(tgg)[31891,31962]  
 caggatatggtgtcaatggtagcatgcgtgtttgggaacatgtggtgtt  
 ggttcgagtcagctatcctga  
 >JX042578.1 Mycobacteriophage EITiger69, complete genome  
 1-tRNA-Trp(cca)[4135,4208]  
 gggtcagtagctcaatcggtagcagcggctccaaagccgcgcttgg  
 aggttcgagtcctccctggcctgc  
 >JX163858.1 Caulobacter phage phiCbK, complete genome  
 1-tRNA-Met(cat)c[103504,103588]  
 ggtacggtggctcgacaggttaaggcatcggcctcataagccgagggttcg  
 tcccaatcctggttcaaatccaggtcgtacctcca  
 1-2tRNA-Met(cat)c[103955,104033]  
 cgcggggtagaggagtcgggtgtcctcgtctggctcataaccaggagat  
 cgtgggttcaaatcccactcccgtccca  
 1-4tRNA-Gly(tcc)[105106,105179]  
 ttgcgaatagcacagtggtagtgcaacagccgcctagctgtcggtcgc  
 ggggtcaatccccgcttcgalga  
 1-5tRNA-Cys(gca)[105759,105847]  
 gcttcggtggactgagaggttaggcgcgggattgcaaatctctgctggtg  
 ggaacacctatgagggttcgagtcctcccgaagctcca  
 1-7tRNA-Gly(tcc)c[155227,155304]  
 gcgcgggtagctcaatggaccagagcagccgtctccacacggaaggtt  
 gggggttcgaatccctccccgtgcgcca  
 1-8tRNA-Ile(aat)c[155507,155581]  
 tccagtaatgcacaaggtgtgcagcggcactgttaatgcctgtgagccc  
 ggttcgattccggggtctggagcca  
 1-9tRNA-Gln(ttg)c[155597,155670]  
 tctcgggtggtctaattgtaagacatctggttttggtccagaggattggg  
 gttcgattccttgccgagaacca  
 1-10tRNA-Gln(ctg)c[155678,155751]  
 tgagggttcgtctaacggtaggacggctgggtctggtccagctaattag

gttcgagtcctagcccctcatcca  
1-11tRNA-Val(cac)c[155757,155832]  
tggcgtttagcatagtgggagtcaggggtgtcacatacctcgatcgaac  
tggttcgattccagtaacccaacca  
1-12tRNA-Ile(gat)c[155866,155940]  
tgtggcatagctcagggtagagcgcgcgttgataagcgtgaggtcggg  
ggttcgaagccctctgccactacca  
1-13tRNA-Ile(gat)c[155948,156023]  
gcaagtgtagctcagtcggtagagcagcggaccgataatccgcctgtccc  
tggttcgagtcaggcatttgcacca  
1-14tRNA-Val(gac)c[156026,156101]  
gcccgatgagccagatgggaaggcgcgccgtgacatggcgggattgaga  
aggttcgattccttcatcaggcacca  
1-15tRNA-Phe(gaa)c[156107,156182]  
ggactcgtagctcagcaggtagagcgcggcttgaaaccccgaggtcgg  
aggttcgattcctcccgtttccacca  
1-16tRNA-Ser(gga)c[156876,156963]  
ggatgtatggctgagaggccgaaggcgcgccgttgaaaagcgggtgaacc  
gcaaggttccgtaggttcgaatcctactgcatccgcca  
1-17tRNA-Ser(cga)c[156968,157055]  
ggtaggttggctgagaggccgaaggcgcgccgttcgaaaacgggaggacc  
gcaaggttccgtgggttcgaatcccacacctacctcca  
1-18tRNA-Ala(tgc)c[157060,157130]  
ggggtatgcgagggcgcaggcatcctttgcaaggaagtcggggtgggtt  
cgagtcccacatactccacca  
1-19tRNA-Leu(gag)c[157214,157302]  
tgcgaagtggcggaactttggtagacgcaccggcatgagaggccggcgcc  
cttcggggcgtgagggttcagtccttcttcgcgacca  
1-20tRNA-Leu(caa)c[157308,157392]  
gccggtctggcggaatggcagacgcagtggttcaagtcaccaccgctt  
cgggcgtcccgttcgaggccggggaccggcacca  
1-21tRNA-Leu(cag)c[157400,157483]  
gcgaaagtggcggaacggcagacgcactggtctcaggtaccagcgacttc  
ggtcatgaggggttcgaatccctcctttctgtacca  
1-22tRNA-Lys(ttt)c[157490,157580]  
gcacgagtacccgagcggcgaaggcgtcgacttttaatcgactaggcg  
tcgcgcctcaccgaggggttcgagtcctcctctgtgtcca  
1-23tRNA-Lys(ctt)c[157587,157673]  
ggatgtgtcacctcagtgccgagaggaccgggctttaatccggcagcga  
aagctcatctgtgggttcgagtcaccacatcctcca  
1-24tRNA-Pro(ggg)c[157864,157938]  
cgggatgtagctcagcggtagagcgcggctgggggcccgcgagggccgca  
ggttcgagacctgccacccgacca  
1-25tRNA-Pro(cgg)c[157946,158021]



cggggtgtagctcagtcggtagagcgctcggttcgggaccgagaggccgt  
 ggggtcaggtccgccaccagacca  
 1–26tRNA–Asp(gtc)[159461,159535]  
 ggtgcggttcgtatatcggtcaatactccgattgtcgatccggcaagagg  
 ggttcgattcccctacgcaccgcca  
 1–27tRNA–Glu(ttc)[159558,159635]  
 ggcccggctcgtctagcggttgcaggattcgactttcaatcacgagag  
 cggagttcaggtcctcggtcgggcctcca  
 1–28tRNA–Gly(tcc)[159792,159865]  
 gcggatatagctcaaaggagagctactgccttccaagcagaagatgcgg  
 gttcgagccccgctatccgctcca  
 1–29tRNA–Gly(gcc)[159872,159946]  
 gcgtccatcgatatgggtattgttcgcgttgccaacgcgacgaaccg  
 ggttcgagtcgggtggacgctcca  
 1–30tRNA–Trp(cca)[159952,160027]  
 gtcggtctagctcatgggtagagcggcggtctccaaaaccgcgctggc  
 aggttcgagtcctgcgaccggcgcca  
 >JX307704.1 Mycobacterium virus Goose, complete genome  
 1–1tRNA–Trp(cca)[3783,3858]  
 aggcacgtagctcaattggaagagcagcggctctccaaagccgcccgttc  
 aggttcgagtcctgccgtgtctgcca  
 >JX411619.1 Mycobacterium virus Rebeuca, complete genome  
 1–1tRNA–Trp(cca)[3968,4043]  
 aggcacgtagctcaattggaagagcagcggctctccaaagccgcccgttc  
 aggttcgagccctgccgtgtctgcca  
 >JX889246.1 Streptomyces phage phiCAM, complete genome  
 1–1tRNA–Arg(cct)[45921,46003]  
 cacctcgtgggacgggttcaagaccacctcctgagtggtcagcgtgagcg  
 gcacacactccggttcgagtcggggcagcgac  
 >KC333879.1 Enterobacteria phage phiJLA23, complete genome  
 1–1tRNA–Arg(cct)[22052,22127]  
 gttctgctggcgtaacaggataacgcagagacctctaagtctcagttac  
 tgggtcaggtccagtcggaacacca  
 >KT591491.1 Mycobacterium phage Bricole, complete genome  
 1–1tRNA–Arg(ccg)[32341,32436]  
 ctccacgtggcgaatggcaatgtggcagagggttcgggtcccgaggg  
 gcgggggatctcagacttccgcctcggttcgactccgtcgtggtgg  
 1–2tRNA–Trp(cca)[54546,54617]  
 atgggcgtagctgactgggaagcaacggtctccaaagccgtgatatgcag  
 gttcgaatcctgccgcccgtgc  
 1–3tRNA–Asn(gtt)[55466,55537]  
 tggcctgtcggttaacggcaaacagcgccctgttaaggcgtgactcctg  
 gttcgaatccaggtaggccagc  
 1–4tRNA–Gln(ttg)[56294,56365]

cgggacatagctcaaatggcagagtggggcaattggtgccctggattcag  
gttcgactcctggtggcccgac  
1-5tRNA-Tyr(gta)[56750,56832]  
gcggtctctcccctattggcgaagggcccctggctgtaaccagggttt  
cgagtggtggttcgaatccatcaggccgcac  
1-6tRNA-Gln(ctg)[57001,57073]  
tgctctctctctaactggcaggacaccagaatctgactctggcagttga  
ggttcgaatccttggggagcaac  
1-7tRNA-Pro(tgg)[57077,57150]  
ctgggtgaggtgtaagtggttgcattggccggtttgatccggcggttcg  
aggttcgagtcctcgcacccagac  
1-8tRNA-Ser(gct)[57446,57527]  
gagtgaaccatctaggtggatggccgcgattgctaactgtggggcagcg  
taacgctgtgtggatcgtgcccactcctctcc  
1-9tRNA-Phe(gaa)[57637,57712]  
cgggtttagctcagattggtgagagcgctcggttgaaaccgagaggcc  
cctggttcgaatccaggcatcccggc  
1-10tRNA-Met(cat)[57800,57871]  
tgcgcggtagtgaacgggatcacaaggtctcataagcctttattacgg  
gttcgaatcccgtctcgcgaac  
1-11tRNA-Arg(acg)[58151,58225]  
ccgccgcagcacgacggacgtgcacctcgctacgaacgagaaggctgct  
ggttcgaatccagtcggtgggtcca  
1-12tRNA-His(gtg)[58228,58300]  
cccccttagctcaatggtgagagcgccgtttgtgagaccggtgacctg  
cggtcgattcgagcagggggac  
1-13tRNA-Cys(gca)[58306,58378]  
ggcgggatggctgagttagataggcggcgggctgaaccccggtcacgcc  
ggggcagatccggctctcgtctc  
1-14tRNA-Leu(cag)[58640,58714]  
ggctcgctaggcaaattggaaaagccgctgattcagaatcaggtgttc  
cgagttcgactctcggcgagctac  
1-15tRNA-Lys(ctt)[59734,59807]  
gggacgttggtgaaacggctatcaccgcagctcttaacgtgcagttct  
gggttcgaatcccaggcgtccac  
1-16tRNA-Gly(tcc)[59930,60005]  
ggggcattcatctagttaggtcaggatcgacgcttccaacgtcgtcac  
gagggttcgaatccttcacgtcac  
1-17tRNA-Val(tac)[60010,60082]  
tccggattagctcagtggaagagcggcaggtttacacctgcgcgtgggg  
agttcgattctctcatccgaac  
1-18tRNA-Thr(agt)[60086,60158]  
gccggtatagctcagtggttagagcacctgtctagtaaaccaggagaccag  
ggttcgattccctgtccggctc

1-19tRNA-Asp(gtc)[60273,60348]  
cccgccatcatctagcggcccaggatgccgccctgtcgaggcggtcacac  
gggttcaaatcccgttggcgggacca  
1-20tRNA-Glu(ctc)[60350,60421]  
gggttcattggtgtaacggcagcatgtcacctctcaaggtgaaggcaggg  
gttcaactcccctatgaactgc

>KC661276.1 Mycobacterium phage Winky, complete genome

1-1tRNA-Thr(cgt)[63338,63411]  
gccaccttagctcagttggtagagcagccccttcgtaacgggcaggtcag  
cggttcgattccgctaggtggctc  
1-2tRNA-Pro(tgg)[63639,63713]  
ctggctgtagctcaactggtagagcgctggcttgggtgccaggggttg  
caggttcaaatcctgtagccagac  
1-3tRNA-Trp(cca)[63834,63907]  
agctcggtagctcaattggtagagcagcggtctcaaagccgccggttcc  
ccgttcgagtcggggtcgggttgc  
1-4tRNA-Tyr(gta)[64018,64100]  
gtggtggttgggcttgttggttggcccacctgactgtaaatcaggcgttt  
cggcaccgggggttcgattccctcccaccacac  
1-5tRNA-Leu(tag)[64515,64589]  
ggccctctagcccaattggcagaggcacaggttttaggtacctgtcagtg  
cgagttcgagtctcgcgggggccac  
1-6tRNA-His(gtg)[64590,64659]  
gcttagtagcctagtggtaaggcagccggttgatccggtgaacctgag  
ttcgattctcagctaaagcc  
1-7tRNA-Gln(ctg)[64664,64738]  
tgaccggtagcacaaactgtagttgcgccgcgctctggacgcggaggttg  
ttggttcgatcccagctcggtcagc  
1-8tRNA-Gly(tcc)[64854,64928]  
gtgctagtaaccatgttggctgggtgcctgactccactcaggatttcg  
cgggttcgattcctgtctagcacac  
1-9tRNA-Lys(ctt)[64971,65048]  
tgccctcgttagctcagttggtagagctccgactcttaatcggtaggtca  
caggttcaagtctgtacggggtacca  
1-10tRNA-Cys(gca)[66238,66311]  
gccgtcatggctgagtggttaggcgtcggactgcaaatccggttatccc  
agttcgattctgggtggcggctcc  
1-11tRNA-Asn(gtt)[66673,66746]  
tcctccgtagctcaattggcagagcgcgcgactgtaatcgctggttgg  
tggttcgagtccacccgttggagc  
1-12tRNA-Lys(ttt)[66940,67014]  
gcccctatagctcagttggtagagcaggagacttttaatcttcgggtcct  
aggttcgatccctagtgggggcacc

>KC691254.1 Mycobacterium phage Breezona, complete genome

1-tRNA-Thr(cgt)[63338,63411]  
gccaccttagctcagttggtagagcagccccttcgtaacgggcaggtcag  
cggttcgattccgctaggtggctc

1-2tRNA-Pro(tgg)[63639,63713]  
ctggctgtagctcaactggtagagcgctggctttgggtgccaggggtg  
caggttcaaatcctgtagccagac

1-3tRNA-Trp(cca)[63834,63907]  
agctcggtagctcaattggtagagcagcggtctcaaagccgccggttcc  
ccgttcgagtcggggtcgggttgc

1-4tRNA-Tyr(gta)[64018,64100]  
tgggtggttgggcttgttgggtggccacctgactgtaaatcaggcggtt  
cggcaccgggggttcgattccctcccaccacac

1-5tRNA-Leu(tag)[64514,64588]  
ggccctctagcccaattggcagaggcacaggttttaggtacctgtcagtg  
cgagttcgagtctcggggggccac

1-6tRNA-His(gtg)[64589,64658]  
gcttagtagcctagtggtaaggcagccggttgatccggtgaacctgag  
ttcgattctcagctaaagcc

1-7tRNA-Gln(ctg)[64663,64737]  
tgaccggtagcacaaactgtagttgcgccgctctggacgcggaggttg  
ttggttcgatcccagctcggtcagc

1-8tRNA-Gly(tcc)[64853,64927]  
gtgctagtaaccatgttggctgggtgcctgacttccactcaggatttcg  
cgggttcgattcctgtctagcacac

1-9tRNA-Lys(ctt)[64970,65047]  
tgccctgtagctcagttggtagagctgccgactcttaacggtaggtca  
caggttcaagtctgtacgggtaccca

1-10tRNA-Cys(gca)[66237,66310]  
gccgtcatggctgagtggttaggcctcgactgcaaatccggcttatccc  
agttcgattctgggtggcggctcc

1-11tRNA-Asn(gtt)[66672,66745]  
tcctccgtagctcaattggcagagcgcgactgttaatcgctggttgg  
tggttcgagtcacccgttggagc

1-12tRNA-Lys(ttt)[66939,67013]  
gccctatagctcagttggtagagcaggagacttttaattctcgggtcct  
aggttcgatccctagtgggggcacc

>KT373978.1 Mycobacterium phage Ukulele, complete genome

1-tRNA-Arg(cct)[62194,62277]  
atggcccgtagctcagtcaggtagagcagccttcccccttcggggcttgg  
ttctccccgggtcgaatccggcgggccttgcc

1-2tRNA-Gly(tcc)[62280,62352]  
gcgcccgtggtcgaattggaaagactcctggcttccaccaggttatgca  
ggttcgagtcctgtcgggcgctc

>KF017927.1 Mycobacterium phage Odin, complete genome

1-tRNA-Asn(gtt)[4130,4205]  
tgacgtgtagctcaattggcagagcaccggctgtaaccggacggtga  
aggttcgagtccttccacgtcagcca

1-2tRNA-Lys(ctt)[4242,4315]  
ggggcagtagctcagtcggtagagctcggactcttaatccgtaggtcgc  
aggttcgalccctgcctgccccac

>KF493883.1 Mycobacterium phage Mosby, complete genome  
1-tRNA-Arg(cct)[62199,62282]  
atggcccgtagctcagtcaggtagagcagccttgccttgcgggcttgg  
ttcgtccccgggtcaaatccggcgggccttgcc

1-2tRNA-Gly(tcc)[62285,62357]  
gcgcccgtggtcgaattggaaagactcctggcttccaccaggttatga  
ggttcgagtcctgtcgggcgctc

>KX375815.1 Mycobacterium phage ToneTone, complete genome  
1-tRNA-Asn(gtt)[5312,5384]  
tgacgtgtagctcaatggcagagcaccggctgtaaccggacggttgaa  
ggttcgagtccttccatgtcagc

1-2tRNA-Trp(cca)[5389,5462]  
gcgctcctagctcaattggtagagcagcggctcctcaaagccgcgagttcc  
aggttcgagtcctggggagcgtgc

1-3tRNA-Gln(ctg)[5504,5576]  
tcctgttcgtctaatacggtgaagacaccggctctggacccggcaatcga  
ggttcgagtccttgatggggagc

>KF771236.1 Escherichia phage bV\_EcoS\_AHP24, complete genome  
1-tRNA-Arg(cct)[46138,46213]  
gttctgctggcgtaacaggataacgcagagacctctaagtctcagttgc  
tggttcgagtcagcgcagaacgccca

>KJ094032.2 Enterococcus phage VD13, complete genome  
1-tRNA-Trp(cca)[30832,30905]  
tgagttgttagtgaatggttagcacaacagtcctcaaaactgtagaga  
gggttcgattccttcactgcttgt

>KJ567045.1 Mycobacterium phage Emerson, complete genome  
1-tRNA-Trp(cca)[1009,1082]  
gggtgtgtagctcaatcggtagagcagcggctcctcaaagccgccggttgc  
acgttcgagtcgtgccgcgccgc

>KT361920.1 Mycobacterium phage Slarp, complete genome  
1-tRNA-Arg(gcg)[14207,14300]  
tcggcgcgctgcgcaggagatgggcagcagcgttcgcggcaccctgtcg  
aacctcaaggcggtctattcgcggttcggtgccgagctgtcggg

1-2tRNA-Lys(ttt)[30855,30930]  
gccccgtagctcaatcggaagagcagccggctttaaccggcggttacg  
gagatcgaaactccggcgggcacca

>KM233455.1 Mycobacterium phage Farber, complete genome  
1-tRNA-Asn(gtt)[3833,3908]

tgatctgtagctcaatcggcagagcacccggctgtaaccgggacgttgg  
 aggttcgagtcctcccagatcagcca  
 1-2tRNA-Trp(cca)[3949,4023]  
 aggcacgtagctcaattggtagagcagcggctcctccaaagccgccggctg  
 caggttcgagtcctgccgtgtctgc  
 1-3tRNA-Leu(cag)[4058,4132]  
 ggctcggtaggcaaacaggcaaagccgcctgtctcaggaacaggtgcgtg  
 agggttcgactccctcccagctac  
 >KX458237.1 Mycobacterium phage Penny1, complete genome  
 1-1tRNA-Asn(gtt)[3838,3913]  
 tgatctgtagctcaactggcagagcacccggctgtaaccgggtcgttgg  
 aggttcgagtcctcccagatcagcca  
 1-2tRNA-Trp(cca)[3954,4028]  
 aggcacgtagctcaattggtagagcagcggctcctccaaagccgccggctg  
 caggttcgagtcctgccgtgtctgc  
 1-3tRNA-Leu(cag)[4063,4137]  
 ggctcggtaggcaaataaggcaaagccgcctgtctcaggaacaggtgcgtg  
 agggttcgactccctcccagctac  
 >KM592966.1 Mycobacterium phage QuinnKiro, complete genome  
 1-1tRNA-Asn(gtt)[3984,4059]  
 tgatctgtagctcaatcggcagagcacccggctgtaaccgggacgttgg  
 aggttcgagtcctcccagatcagcca  
 1-2tRNA-Trp(cca)[4100,4173]  
 aggcgcgtagctcaattggtagagcagcggctcctccaaagccgctggctgc  
 aggttcgagtcctgccgcgtctgc  
 >KM979355.1 Enterobacteria phage DT571/2, complete genome  
 1-1tRNA-Gly(tcc)c[24894,24968]  
 gcgtgattagttcagcggctagaataactggcttccaaccagtagacacg  
 agttcgactctcgtatcccgacca  
 1-2tRNA-Gln(ttg)c[24980,25057]  
 tggggattagcttagcttggcctaaagctacggcatttgaagtcgagatc  
 attggttcaaatccaatatcccctgcc  
 1-3tRNA-Gln(ctg)c[25064,25139]  
 agaacctgagccaagtcggttaaggctggggtctctgaaacctgatcag  
 tggttcaaatccactaccttctgcc  
 1-4tRNA-Arg(acg)c[25557,25631]  
 gcgtccttatttcaatggaagaatgtaaagccacgaactttacgattgg  
 ggttcgattccctgaggatgcacca  
 1-5tRNA-His(gtg)c[25638,25714]  
 tgggtatatcataattggtaatgatcctgatttgaatcaggcctatg  
 tggattcgaattccactagccaccca  
 1-6tRNA-Leu(tag)c[26249,26325]  
 gcgtgattgatggaattggcatataccgtccctagaagtcgggttttg  
 agggttcgaatccctgtcacgcacca

1-7tRNA-Ala(tgc)c[26331,26404]  
ggggatatagtttaatggtagaacatctgctttgcacgcagaagacgagg  
gttcaactccctctttctccacca  
1-8tRNA-Met(cat)c[28310,28384]  
gggtcggtagcttaaagtaaagcggtaggcctcataagctaacgagtagg  
agttagattctcctccgaccacca  
1-9tRNA-Ser(gct)c[28391,28479]  
ggaagaatagcataacggtattgcagcagattgctaactctgcggttga  
aatatagccttgggttcgattcccgcttctccgcca  
1-10tRNA-Arg(tct)c[30213,30287]  
cggggtgtagtctaaggagaggcaggagcttctaattcctttatgca  
ggttcgaatcctgtcacctcgcca  
1-11tRNA-Ser(act)c[30788,30861]  
tgccgatctagtataaacggtattatcaagccgtaactggtggaagatgt  
aggttcgaatcctacgatcggtaa

>KP017310.1 Mycobacterium phage Phoxy, complete genome

1-1tRNA-Asn(gtt)[3922,3997]  
tgatctgtagctcaatcggcagagcacccggctgtaaccgggacgttgg  
aggttcgagtcctccagatcagcca  
1-2tRNA-Trp(cca)[4038,4112]  
aggcacgtagctcaattggtcagagcagcggctcctcaaagccgaggctg  
caggttcgagtcctgccgtgtctgc  
1-3tRNA-Leu(cag)[4147,4221]  
ggctcggtaggcaaacaggcaaagccgcctgtctcaggaacagggtgcgtg  
agggttcgactccctcccgagctac

>KP017311.1 Mycobacterium phage Spike509, complete genome

1-1tRNA-Asn(gtt)[3922,3997]  
tgatctgtagctcaatcggcagagcacccggctgtaaccgggacgttgg  
aggttcgagtcctccagatcagcca  
1-2tRNA-Trp(cca)[4038,4112]  
aggcacgtagctcaattggtcagagcagcggctcctcaaagccgaggctg  
caggttcgagtcctgccgtgtctgc  
1-3tRNA-Leu(cag)[4147,4221]  
ggctcggtaggcaaacaggcaaagccgcctgtctcaggaacagggtgcgtg  
agggttcgactccctcccgagctac

>KP027195.1 Mycobacterium phage Cosmo, complete genome

1-1tRNA-Trp(cca)[58394,58465]  
gcgctgatagttagtggaacacggcaagctccaaccttgctatctggg  
gttcaagtctcatcagcgtgc  
1-3tRNA-Pro(tgg)[59446,59517]  
cagggtgtggtgtagtggtcgcattggccttgaagcaggcggacgca  
gttcaattctgcgcaccctgac  
1-4tRNA-Phe(gaa)[59841,59914]  
cggtcgttagtgaagatggagatcacgggcctgaaaaccccgagacgc

agggttcgattcctgcacgaccggc  
1-5tRNA-Met(cat)[59923,59997]  
ggcagagtagagaaacggatatctcgcaaggctcataaccttgaaaaagg  
cgggttcgactccccctctgctcc  
1-6tRNA-Tyr(gta)[60111,60193]  
gcgtcagacgcacattgggtagtcagcggctgtaaaaccgtcgccttc  
gggcattgggggttcaagtcctcctgacgcac  
1-7tRNA-Ala(tgc)[60266,60337]  
gggggtatcgataatgggtattacgcctgccttgcaagcaggtcattggg  
gttcaattccccatacctccac  
1-8tRNA-Val(tac)[60392,60463]  
gcccgttagctcaatgggagagccaccggcctacacccggtagacgaga  
gttcaattctttcagcgggtac  
1-9tRNA-Leu(tag)[60534,60608]  
ggctcgttatgcaaaccggcaaagcagcctgccttagaagcaggtgtttc  
agggttcgactccctggcgagctac  
1-10tRNA-Leu(caa)[60666,60739]  
ggtcgtgtaggcaaattggcaaagcccaagctcaaacctgggtgttgt  
gggttcaactcccaccgcgactac  
1-11tRNA-Gly(tcc)[60835,60908]  
gagggtgaagtgttaacggtatgcacggctgtctccaacagcaagagc  
gagttcgattctcgtcacccccac  
1-12tRNA-Gly(gcc)[60984,61055]  
gtggacgtgatgtaatggtagcctccccgcttgccaagcagggtgtgcgg  
gttcaattcccgctcgtccgcac  
1-13tRNA-Gln(ctg)[61244,61316]  
tgcctatggtgtaattgacagcacgggtggctctgaacctatgctga  
ggtttgaatccttggggcagc  
1-14tRNA-Asp(gtc)[61534,61606]  
cccgcatagtgtagtggttaacacgccagctgtcacgctggtagcgag  
ggttcaattccctctggcggggc  
1-15tRNA-Thr(agt)[61613,61687]  
ggctttgtagctcaacggttttagagcagctgtctagtaaagcggacc  
agggttcgactccctgcttagcctc  
1-16tRNA-Lys(ctt)[61860,61934]  
gcctcgctagttaatggccaaaaccgagactcttaatctgtcagactc  
tgggttcgaatcccaggcggggcac  
1-17tRNA-Cys(gca)[61941,62016]  
gccggtgtgacagaacgatttatgtggcagctgcaaaactgacctaaagc  
gggtttgactcccgccaccggtcca  
1-18tRNA-Ile(gat)[62019,62091]  
tggcccgtagttcaacggttaagaacggatcgctgataacgatcagacaag  
agttcaactctctcgggccaac  
1-19tRNA-Arg(acg)[62198,62271]



gcccgtgtagctcagtggatagagccgtggcctacgaagccatgggccgg  
gggttcgaatccctccacgggtac

1-20tRNA-Ser(gct)[62297,62379]

ggagagtgatgaacaggggtggtgcactcgcctgctaagcgaatgtgtct  
gcaaggatcacgttcaactcgtctctccgc

1-21tRNA-His(gtg)[62381,62454]

gtgtctgtagctcaatggtagacctcccgtgtgaccgggacgacgacg  
ggtcagaaccgtccagacacccca

1-22tRNA-Glu(ttc)[63073,63145]

ggttccgtggtgtaacggttagcacctgggtcttcaagcccaaggtcag  
ggttcaactccctgcggaactgc

1-23tRNA-Glu(ctc)[63150,63221]

ggcccactggtgtaatgggaacacgccaccccctcaaggaggagtcaggg  
gttcaattcccctgtgggctac

1-24tRNA-Asn(gtt)[63227,63298]

tccggtatcgttcaaaggcaggacaccaagctgtaacttggtatgttg  
gttcgatcccagctaccggagc

>KR422353.1 Escherichia phage APCEc03, complete genome

1-1tRNA-Ser(gct)[614,702]

ggaagaatagcataacgtattgcagcagattgctaattctgcggttga  
aatatagccttgtgggttcgattcccacttctccgcca

1-2tRNA-Ser(tga)[1580,1669]

ggaaggtagggcgtagtggtacgcaactagcttgaaaactagcccgtg  
tagtgatacgggtgatggttcgactccattaccttctcca

1-3tRNA-His(gtg)[2260,2336]

gtggctatatcataattggttaatgatcctgattgtgaatcaggcctatg  
tggattcgaattccactagccacccca

1-4tRNA-Gln(ctg)[2526,2601]

agaaggttagccaagtcggttaaggctgggtctctgaaatcctgatcag  
tggttcaaatccactaccttctgcca

1-5tRNA-Gln(ttg)[2607,2684]

ttgggattagcttagcttggcctaaagcttcggccttgaagtcgagatc  
attggttcaaatccaatatcccctgcca

1-6tRNA-Thr(tgt)[3201,3287]

gctgggttggcagaatggttgaatgcacctgatttgaatcaggaggagt  
aatcccgttcaggttcgaatcctgtgccacgacca

1-7tRNA-Ile(gat)[4039,4115]

gcttcggtagcttagcgatctaaagcactcggctgataaccgagagatcg  
ggggtttaaaccctcccggagtacca

1-8tRNA-Met(cat)[4212,4287]

agttagttggcagagtggttatgcacctcctcatacggagcgactacag  
tggttcaaatccactactaactacca

1-9tRNA-Arg(tct)[102659,102733]

cggggtgtagtctaaggagaggcaggagtcttctaattcctttatgca

gggtcgaatcctgtcacctcgcca  
 >JX015524.1 Mycobacterium virus Astro, complete genome  
 1-tRNA-Trp(cca)[4055,4128]  
 gggtcagtagctcaattggtagagcagcggctcctccaaagccgctcgttgg  
 gggttcgagtcctcctggcctgc  
 >KT020852.1 Mycobacterium phage NoSleep, complete genome  
 1-tRNA-Arg(cct)[62056,62139]  
 atgcccgtagctcagtcaggtagagcagccttcccccttgcgggcttgg  
 ttcgtccccgggtcaaatccgggcgggccttggc  
 1-2tRNA-Gly(tcc)[62142,62214]  
 gcgcccgtggtcgaattggaaagactcctggcttccaccaggttatgca  
 gggttcgagtcctgtcgggcgctc  
 >KT186229.1 Streptomyces phage Verse, complete genome  
 1-tRNA-Arg(cct)c[45153,45235]  
 cacctgctgggacgggttcaagaccacctcctgagtggtcagcgtgagcg  
 gcacacaccccggttcgagtcggggcagcac  
 >KT070867.1 Bacillus phage PBC2, complete genome  
 1-tRNA-Arg(tct)c[148845,148918]  
 tgccttttggtaaatggatatcatgactggtttctaccagtagttag  
 gggttcgaatactctagaggcgct  
 1-2tRNA-Arg(acg)c[148922,148995]  
 taccgatatagtgaaatggatatcacgacagactacgaatctgttagtcc  
 aagttcgaatcttggtatcggtgt  
 1-3tRNA-Gly(tcc)c[149000,149074]  
 gtggtattagtagtagtctggtctagcaccctgccttccaagcaggaaac  
 atcgggtcgaatccgataaccaca  
 1-4tRNA-Ser(gct)c[149083,149171]  
 ggagggttactcaagcgggaagaggactgttgctaaacagttaggcg  
 cagaaatgtccacaggagttcgaatctcctaccctcct  
 1-5tRNA-Ser(tga)c[149178,149264]  
 tggatggttactctaattggaagagacctgccttgaaagcagacgtagg  
 gtaaaaccgatgggggttcaagtcctcaccatccgt  
 1-6tRNA-Thr(tgt)c[149365,149435]  
 gcccgattagtttaatggaaaaacgaggaactgttaattcttagttatca  
 gttcgattctggtattgggct  
 1-7tRNA-Ala(tgc)c[149440,149514]  
 gggggattagtttaatcggtaaaacagtggctttgcacgtcacagaaaag  
 agttcgaatctctatttccacca  
 1-8tRNA-Pro(tgg)c[149694,149765]  
 gtggatatagggaatggttagcctactccttttgaaggagatgttgca  
 agttcgagtcctgctatccgca  
 1-9tRNA-Lys(ttt)c[149771,149843]  
 ggggtattaactcaatggtagagtaatcggttttaaccgatatgctaga  
 gggttcgagtcctctatgaccac

1-10tRNA-Ile(gat)c[149857,149931]  
 tgactagtagctcaactggtagagcatccgattgataatcggaagggtg  
 ttggttcgagtgccaaccttaattgt  
 1-11tRNA-Leu(tag)c[149979,150053]  
 tggcggagtaatccaacggcagagatagtggttttagaagccatccagtg  
 agagttcgaatctctccttcgctat  
 1-12tRNA-Tyr(gta)c[150063,150142]  
 gggcgtgcattcattggcgagataagctgactgtaaatcagtggcgaaag  
 ctgtgttagttcgaatctaaccatgcccac  
 1-13tRNA-Glu(ttc)c[150296,150370]  
 gtcctattggacaaatcggtttaagtcgctaccctttcaaggtagagatt  
 gccagttcgaatctggtatggagta  
 1-14tRNA-Cys(gca)c[150383,150458]  
 ggtcgagttcctagatggctctggggtctagctgcaaaactaggttttga  
 gggttcgaatcccttcttggttcca  
 1-15tRNA-Leu(taa)c[150465,150549]  
 tgcgtgggtgggtggaattggcagacacatgcggtttaagcccgcatgact  
 tcggtcgtgagagttcgagttctctccctacgtalc  
 1-16tRNA-Gln(ttg)c[150681,150759]  
 ttgcggtgtggacaaactggtaaagtcgcctgcctttgaagcaggagatg  
 ttggaggttcgaagccttcaccgcagtc  
 1-17tRNA-Gly(gcc)c[150864,150934]  
 gtgggattagtttagaggtagaattctgattgccattcagaaggaaagg  
 gttcgattcccttatctcaca  
 1-18tRNA-Asp(gtc)c[151628,151702]  
 gggttattagtatatgggttaacacgcttgctgtcacgcaagagaaatg  
 agttcaagtcctgtatagaccgcca  
 1-19tRNA-Asn(gtt)c[151707,151781]  
 tgcacctatagctctaattggtagagcagagagctgtaactctttggttg  
 gtggttcgaatccatctaggtgcgt

>KT345706.1 *Vibrio* phage vB\_VorS-PVo5, complete genome

1-1tRNA-Val(tac)c[244,319]  
 actcccttagctcagtgtagagcacctcccttacaaggaggggggtcgt  
 tggttcgagtgccaacaggagtagcca  
 1-2tRNA-Gln(ttg)c[537,613]  
 aggggattagcttagctggccgaaagcaacggactttgaatccgtgacca  
 caggttcgaatcctgtatccccgcca  
 1-3tRNA-Thr(tgt)c[823,898]  
 gcttcttagctcagttgggagagcagctcactgtaatgagcaggtcgt  
 ccgttcgaatcggaagagcacca  
 1-4tRNA-Gly(tcc)c[971,1057]  
 gcgtactgaagactgagcggtcggtcactagcctccaagctagcgccct  
 taatcgggatagggttcgactccctctgtacgtcca  
 1-5tRNA-Ser(tga)c[1065,1158]

ggaaggccaatccgatggttggcgacggaactggtcttgaaaaccagcga  
gtgctaatagcgccttgagagttcgatcctctccttccgcca

1-6tRNA-Leu(tag)c[1165,1250]

gcaggagtggtgtaattggtagccgcgtgtgccttagaagca.atgtcct  
agtgcgtgagggttcaagtcctcctcctgtacca

1-7tRNA-Pro(tgg)c[1361,1439]

cggggtgtaatgtcagtcgtcagacggctcgcttggatgcgagaggt  
cgtaggttcgaatcctacccccgacca

1-8tRNA-Asp(gtc)c[1446,1523]

gcggctgtgtgcgagatggttaggcaacctcctgtcacggaggagtag  
gtgggttcaagtcctacggtcgcgcca

1-9tRNA-Asn(gtt)c[1529,1604]

gggggattaactcagtggtcagagtggtgcctgtaagcagctggtcat  
aggttcaaatcctatatcccccgcca

1-10tRNA-Tyr(gta)c[1611,1700]

ggttgaatgcgacgaattggttaagtcagcggattgtaaatccgtagccac  
cgaaaggggcatctaggttcaagtcctagttcaaccacca

1-11tRNA-Met(cat)c[1794,1870]

agaggcttggctgagctggttatagcactcctcatgcggagtaagacg  
ggggttcgaatccctcagcctctacca

1-12tRNA-Ala(tgc)c[1958,2033]

ggggaattagctcagttgggagagcagggtcttgcaaggctcaggtcat  
cgggtcgagtcgcatatttccacca

1-13tRNA-Glu(ttc)c[2040,2115]

acaccggaagacagatggattggtcgtcaccccttcaagtgagtttgc  
gggttcgagtcctcgtccggtgtacca

1-14tRNA-Lys(ttt)c[2117,2193]

gcgctgtagctcagttggttagagcatctgacttttaacaggtggtcg  
aaggttcgagtccttctacgcgacca

1-15tRNA-Met(cat)c[2200,2276]

tgcgagaatggagaaatggcgtcttgcgagttcataagctcgataacgt  
ggggttcgaatcccccatctcgcacca

>KT151957.1 Brevibacillus phage SecTim467, complete genome

1-1tRNA-Asn(gtt)c[7178,7252]

agggtagtagttcaatggtagaacgacgcactgttaatgcgtatgttga  
ggttcgagtcctgccttccctgcca

1-2tRNA-Pro(tgg)c[7356,7432]

cagggttagttcagttcgggagaacaccgcatttgggatgcggaggtcg  
caggttcaagccctgccactctgacca

1-3tRNA-Met(cat)c[7434,7507]

gggtcttttagctcgaaggccgagcaggcggctcatgaccgctaggtgtgg  
gttcgattcccacaagaccacca

1-4tRNA-Cys(gca)c[7546,7618]

gtgtctgtccctagtcggtctagggtacggtctgcaaaaccgtattacgt

gggttcaagtcaccagatgct  
 1–5tRNA–Tyr(gta)c[8396,8478]  
 ggatgagtatgaagaggttaagctgacagagtgtaaatctgtcgctga  
 tggcttcgtaggttcaactcctacctacccac  
 1–6tRNA–His(gtg)c[8486,8574]  
 gtgtacgtggtggaatggtagacacgaagattgtggtcttgtggggc  
 gcaagccccgtgcaggttcaagtcctgtcgtacacccca  
 >KT326767.1 Mycobacterium phage Texage, complete genome  
 1–1tRNA–Asn(gtt)[3984,4059]  
 tgatctgtagtcaatcggcagagcaccggctgttaaccgggacgttgg  
 aggttcgagtcctccagatcagcca  
 1–2tRNA–Trp(cca)[4100,4173]  
 aggcgcgtagctcaattggtagagcagcggctctcaaagccgctggctgc  
 aggttcgagtcctgccgctctgc  
 >KT372003.1 Mycobacterium phage Lumos, complete genome  
 1–1tRNA–Tyr(gta)[39561,39644]  
 gtggcgaaggcaactgttggtttgtgcacctgcctgtaaagcaggcgt  
 tcggcttcgggggttcaattccctctgccacac  
 1–2tRNA–Thr(cgt)[62789,62861]  
 gccaccttagctcagcggtagagcagccttcgtaacgcgcaggtcaac  
 ggttcgattccgttaggtggctc  
 1–3tRNA–Pro(tgg)[63214,63286]  
 cggaaacaggtgtaatggttgcattgaggcgttggatcgccggggttcgg  
 ggttcgactccctggttccgac  
 1–4tRNA–Trp(cca)[63629,63702]  
 agctcggtagctcaactggtagagcagtggtctcaaagccaccggttgc  
 aggttcgactcctgtccgggtgc  
 1–5tRNA–Leu(tag)[63703,63777]  
 ggttcgtaggcaaactggcaaagccgtctgacttagaatcaggtgttg  
 ggagttcgactctccccggaactac  
 1–6tRNA–His(gtg)[63778,63847]  
 gctaagtagcttaatggtaaagccccggttgggtccgggcgatcacgg  
 ttcaactccgtgcttaagcc  
 1–7tRNA–Gln(ctg)[64127,64201]  
 tgcccgctagcacaattggcagttgcgctcgcgtctgaacgcagaggttc  
 caggttcgactcctgggtgggcagc  
 1–8tRNA–Lys(ctt)[64211,64284]  
 gcgtcggttagctcagttggtagagcaggcactctaatgctcgggtcgg  
 gggttcaagtccctcacggcgac  
 1–9tRNA–Pyl(cta)[65427,65519]  
 tgctcaaatgggtaggccgttccctgtcatctaaaggcaggatgcctc  
 gctgttaacgaggtcacgcaggttcgacctgctgggggagc  
 1–10tRNA–Lys(ttt)c[65524,65597]  
 gccgcgctagctcagttggtagagcagctgacttttaacagcgggtccg

gggttcgatccccggcgcggtac  
 >KU255188.1 Mycobacterium phage JenCasNa, complete genome  
 1-tRNA-Asn(gtt)[3838,3913]  
 tgatctgtagctcaactggcagagcacccggctgtaaccgggtcgttgg  
 aggttcgagtcctcccagatcagcca  
 1-2tRNA-Trp(cca)[3954,4028]  
 aggcacgtagctcaattggcagagcagcggctcctccaaagccgctg  
 caggttcgagtcctgccgtgtctgc  
 1-3tRNA-Leu(cag)[4063,4137]  
 ggctcggtaggcaaacaggcaagccgctgtctcaggaacaggtgcgtg  
 agggttcgactccctcccagctac  
 >KU234099.1 Mycobacterium phage MkaliMitinis3, complete genome  
 1-tRNA-Thr(cgt)[63152,63225]  
 gccaccttagctcagttggtagagcagcgccttcgtaacgcgcaggtcag  
 cggttcgattccgctaggtggctc  
 1-2tRNA-Pro(tgg)[63687,63760]  
 cggcccaaggtgaatggcttgcagagcgttggatcgccggggttcc  
 ctgttcgactcggggtggccgac  
 1-3tRNA-Trp(cca)[63831,63904]  
 agcgaattggtgaatcggtagcatagcggcctccaaaccgctgtag  
 aggttcgagtcctctattcgttgc  
 1-4tRNA-Leu(tag)[64277,64351]  
 gtcctcgtaggcaactggcaagccgctgatttaggtcaggtgtttc  
 ggggttcgactccccggtggagcac  
 1-5tRNA-His(gtg)[64351,64423]  
 cgcgaggtagcttaagtagtaaagccccgactgtgactcgggtgattcg  
 ggtgcaagtcccggcctgtcgcc  
 1-6tRNA-Tyr(gta)[64426,64508]  
 gtggcggtgggctgttggttggccgcctgactgtaaatcaggtgtt  
 cggcatcgggggttcgattccctctcgccacac  
 1-7tRNA-Gln(ctg)[64516,64591]  
 tgaccgctagcacaattaggcagttgcgccggaatctgactccggaggt  
 ccaggttcgattcctgggtggtcagc  
 1-8tRNA-Gly(tcc)[64707,64781]  
 gtgctagtaacctatgttggtgggtgccactctccaaagtggattcg  
 cgcgttcgattcgctctagcacac  
 1-9tRNA-Lys(ctt)[64816,64891]  
 gcctcgtagctcagttggtagagcagccgactctaatcgcggtcac  
 aggttcaagtctgtacgggtacca  
 1-10tRNA-Ser(tga)[64893,64982]  
 ggagagtaatgcagcgggggtggccccgcaccgcttgaaagccgggta  
 gccgtaatggagcttggggtcgatccctctgctctccgc  
 1-11tRNA-Cys(gca)[66074,66146]  
 gccgttgtccgagtggttagtgccaggctgcaaaacttggttagtcgc

gttcgattcgcggggacggctcc  
1-12tRNA-Asn(gtt)[66299,66372]  
tcctccgtagctcaattggcagagcgcgcgactgtaatcgctgggttg  
tggttcgagtcacccgttggagc  
1-13tRNA-Lys(ttt)c[66566,66640]  
gccctatagctcagttggtagacaggagacttttaatcttcgggtcct  
aggttcgatccctagtgggggcacc  
>KT626047.1 Mycobacterium phage Dynamix, complete genome  
1-1tRNA-Trp(cca)[1897,1972]  
tggtcttagctcaattggtagacagcggctcctcaaaaccgccggttg  
caggttcgagtcctgcagagtcagcc  
>KU716095.1 Mycobacterium phage Myxus, complete genome  
1-1tRNA-Glu(ctc)[5906,5978]  
gttcggttgagtagcggcaactcatctgactctcactcagaagatcgcg  
ggttcaatccgcacggactac  
>KU935729.1 Mycobacterium phage SkinnyPete, complete genome  
1-1tRNA-Thr(ggt)[26482,26559]  
gatcctacggacgggaaaggacgtactacggtctgtaatccgcaggtc  
ctggttcgagcccagctgggggcacca  
>KU985095.1 Mycobacterium phage ChipMunk, complete genome  
1-1tRNA-Gln(ctg)[4807,4881]  
tccccgttcgtctaattggcaagacgccgggtctggccccgtaattga  
ggttcgaatccttgatggggaacca  
>KX241618.1 Xanthomonas phage Xoo-sp2, complete genome  
1-1tRNA-Met(cat)[11369,11444]  
cgcggggtagagcagctggcagctcgctgggttcataacccggaggtcgt  
gggttcgagtcctccactcccgaacca  
>KX160205.1 Lactococcus phage 49801, complete genome  
1-1tRNA-Met(cat)[96,169]  
ggttctttagctcagttggtcagagctaacggctcataaccgttcggtcg  
ctggttcgagtcagcaagaacca  
>KX160207.1 Lactococcus phage 53801, complete genome  
1-1tRNA-Met(cat)[13752,13823]  
acaggatgggtggcaaggcgtcacgctagtttcataagctagaatagaac  
ggttcaatcccgttatcctgaa  
>KX160208.1 Lactococcus phage 53802, complete genome  
1-1tRNA-Met(cat)[15054,15125]  
acaggatgggtggcaaggcgtcacgctagtttcataagctagaatagaac  
ggttcaatcccgttatcctgaa  
>KX160214.1 Lactococcus phage 98103, complete genome  
1-1tRNA-Met(cat)[115,188]  
ggttctttagctcagttggtcagagctaacggctcataaccgttcggtcg  
ctggttcgagtcagcaagaacca  
>KX557284.1 Gordonia phage Strosahl, complete genome

1-tRNA-Asn(gtt)[5110,5185]  
tcgcctgtagctcaattggcagagcacccggctgtaaccggcggttga  
aggttcgagtccttccaggcgagcca

1-2tRNA-Lys(ctt)[5187,5260]  
gcatctgtagctgagtggttagctctgggctcttaaccggagacggag  
gttcgattcctccagatgcacca

1-3tRNA-Gln(ctg)[5262,5334]  
tccccattcgtccaattggtaggacaccggagtctggtccggagatcga  
ggttcgaatcctcggtagggagc

>KX758539.1 Mycobacterium phage Jaan, complete genome

1-tRNA-Gln(ctg)[6191,6265]  
tcccgctagcacaaactgtagctgcgctcggctctggaccgagaggttt  
gaggttcgaatccttggccgggagc

>KX758538.1 Mycobacterium phage Kerberos, complete genome

1-tRNA-Asn(gtt)[4209,4283]  
tgacgtgtagctcaatggcagagcatccggctgtaaccggacggttgaa  
ggttcgagtccttctcgtcagcca

1-2tRNA-Trp(cca)[4324,4399]  
gtacacgtagctcaattggtagagcagcggctcctcaaagccggttcc  
aggttcgactcctggcgtgtatgcca

1-3tRNA-Gln(ctg)[4407,4479]  
tccccgttcgtctaatacggaagacgcctggctctggaccaggaattga  
ggttcgagtccttggcggggagc

1-4tRNA-Glu(ctc)[4514,4587]  
ggtcccttggagtagcggataactcacctggccctcaccagaagatcgc  
gggttcgaatcccgaggactac

1-5tRNA-Tyr(gta)[4591,4671]  
cgcgagatacccaagcggcaacgggatctgactgtaaatcagacgcttcg  
gcttcgaggttcgagtcctgctctcgcgac

>KX712237.1 Rhodococcus phage Partridge, complete genome

1-tRNA-Asn(gtt)[1496,1569]  
tcacgtatagctcaatcggcagagcaacgcactgttaaggcgggggttga  
aggttcgagtccttctacgtgagc

1-3tRNA-Trp(cca)[1761,1835]  
gggcacgtagctcaattggatagagccccggctcctcaaagccggtggttg  
ggggttcgagtcctccgggcctgc

>KX712236.1 Rhodococcus phage Yogi, complete genome

1-tRNA-Asn(gtt)[1503,1576]  
tcacgtatagctcaatcggcagagcaacgcactgttaaggcgggggttga  
aggttcgagtccttctacgtgagc

1-3tRNA-Trp(cca)[1702,1776]  
gggcacgtagctcaattggatagagccccggctcctcaaagccggtggttg  
ggggttcgagtcctccgggcctgc

>KX688047.1 Mycobacterium phage Marcoliusprime, complete genome



1-tRNA-Arg(gcg)[665,757]  
caccgcttagcgaggttgcgcgccacgtcattgcgcccgacggcatcgtg  
tcgacggcctggccgtcggtgtgtgcacgtgcgcggcgatgg

>KX685355.1 Mycobacterium phage Qobbit, complete genome  
1-tRNA-Glu(ctc)[5936,6008]  
ggtcggttgagtagcggcaactcatctgactctcactcagaagatcgcg  
ggttcaaatcccgacggactac

>KX664447.1 Mycobacterium phage Phaeder, complete genome  
1-tRNA-Glu(ctc)[5906,5978]  
ggtcggttgagtagcggcaactcatctgactctcactcagaagatcgcg  
ggttcaaatcccgacggactac

>KX664448.1 Mycobacterium phage Watson, complete genome  
1-tRNA-Asn(gtt)[3832,3907]  
tgatctgtagtcaatcggcagagcaccggctgttaaccgggacgttgg  
aggttcgagtcctcccagatcagcca  
1-2tRNA-Trp(cca)[3948,4022]  
aggcacgtagtcaattggtagagcagcggctcctcaaagccgcccggctg  
caggttcgagtcctgccgtgtctgc  
1-3tRNA-Leu(cag)[4057,4131]  
ggctcgtaggcaaacaggcaaagccgctgtctcaggaacaggtgcgtg  
agggttcgactccctcccagctac

>KX670828.1 Mycobacterium phage Todacoro, complete genome  
1-tRNA-Asn(gtt)[3984,4059]  
tgatctgtagtcaatcggcagagcaccggctgttaaccgggacgttgg  
aggttcgagtcctcccagatcagcca  
1-2tRNA-Trp(cca)[4100,4173]  
aggcgcgtagtcaattggtagagcagcggctcctcaaagccgctggctgc  
aggttcgagtcctgccgctctgc

>KX640831.1 Mycobacterium phage Margo, complete genome  
1-tRNA-Asn(gtt)[4009,4084]  
tgatctgtagtcaatcggcagagcaccggctgttaaccgggacgttgg  
aggttcgagtcctcccagatcagcca  
1-2tRNA-Trp(cca)[4125,4198]  
aggcgcgtagtcaattggtagagcagcggctcctcaaagccgctggctgc  
aggttcgagtcctgccgctctgc

>KX621007.1 Mycobacterium phage Taquito, complete genome  
1-tRNA-Lys(ttt)[31241,31316]  
gccccgtagtcaatcggaagagcagccggtttaaccggcggttacg  
gagatcgaaactccggcggggcacca

>KX619650.1 Mycobacterium phage Jerm, complete genome  
1-tRNA-Gln(ctg)[4797,4871]  
tccccgttctgaagcggcaagacaccgggtctggccccggcaatcga  
ggttcgaatccttgatggggagcca

>KX611831.1 Mycobacterium phage Pharsalus, complete genome

1-tRNA-Arg(cct)[62609,62692]  
atggcccgtagctcagtcaggtagagcagccttgccccttgcgggcttgg  
ttcgtccccggttcaaatccggcgggccttgcc  
1-2tRNA-Gly(tcc)[62695,62767]  
gcgcccgtggctgaattggaaagactcctggcttccaccaggttatgca  
ggttcgagtcctgtcgggcgctc

>KX580961.1 Mycobacterium phage Zakai, complete genome

1-tRNA-Thr(cgt)[63048,63121]  
gccaccttagctcagttggtagagcagccccttcgtaacgggcaggtcag  
cggttcgattccgctaggtggctc  
1-2tRNA-Pro(tgg)[63349,63423]  
ctggctgtagctcaactggtagagcgctggcttgggtgccaggggtg  
caggttcaaatcctgtagccagac  
1-3tRNA-Trp(cca)[63544,63617]  
agctcggtagctcaattggtagagcagcggtctcaaagccgcccgttcc  
ccgttcgagtcggggtcgggttgc  
1-4tRNA-Tyr(gta)[63729,63811]  
gtggtggttgggcttgttggttggcccacctgactgtaaatcaggcggtt  
cggcaccgggggttcgattccctccccacac  
1-5tRNA-Leu(tag)[64225,64299]  
ggccctctagcccaattggcagaggcacaggttttaggtacctgtcagtg  
cgagttcgagtctcgcgggggccac  
1-6tRNA-His(gtg)[64300,64369]  
gcttagtagcctagtggtaaggcagccggttgatccggtgaacctgag  
ttcgattctcagctaaagcc  
1-7tRNA-Gln(ctg)[64374,64448]  
tgaccggtagcacaaactgtagttgcgccgcgctctggacgagggttg  
ttggttcgatcccagctcggtcagc  
1-8tRNA-Gly(tcc)[64564,64638]  
gtgctagtaaccatgttggtgggtgcctgactccactcaggatttcg  
cgggttcgattcctgtctagcacac  
1-9tRNA-Lys(ctt)[64681,64758]  
tgccctgtagctcagttggtagagctcccactcttaatcggtaggtca  
caggttcaagtctgtacggggtacca  
1-10tRNA-Cys(gca)[65948,66021]  
gccgtcatggctgagtggttaggcgtcggactgcaaatccggttatccc  
agttcgattctgggtggcggctcc  
1-11tRNA-Asn(gtt)[66383,66456]  
tcctccgtagctcaattggcagagcgcgcgactgtaatcgctggttgg  
tggttcgagtcacccgttggagc  
1-12tRNA-Lys(ttt)[66650,66724]  
gcccctatagctcagttggtagagcaggagacttttaattctcggtcct  
aggttcgatccctagtgggggcacc

>KX580962.1 Mycobacterium phage Wilder, complete genome

1-tRNA-Thr(cgt)[62791,62862]  
ctggattagcttagtggtcaagcgctgccttcgtaacgcagattcaccg  
gttcgattccggtatccagctc

1-2tRNA-Pro(tgg)[63091,63165]  
ctggctgtagctcaactggtagagcgctggcttgggtgccaggggtg  
cgggttcaaatcctgtagccagac

1-3tRNA-Trp(cca)[63295,63368]  
agctcggtagctcaattggtagagcagcggtctcaaagccgccgttcc  
ccgttcgagtcggggtcgggttc

1-4tRNA-Tyr(gta)[63480,63562]  
tgggtggttgggcttgttgggtggccacctgactgtaaatcaggcggtt  
cggcaccgggggttcgattccctcccgcacac

1-5tRNA-Leu(tag)[63604,63678]  
ggccctctagcccaattggcagaggcacaggttttaggtacctgtcagtg  
cgagttcgagtcgcggggggccac

1-6tRNA-His(gtg)[63679,63748]  
gcttagtagcctagtggttaaggcagccggttgatccggtgaacctgag  
ttcgattctcagctaaagcc

1-7tRNA-Gln(ctg)[63753,63827]  
tgaccggtagcacaaactgtagttgcgccgcgctctggacgcggaggttg  
ttggttcgatcccagctcggtcagc

1-8tRNA-Gly(tcc)[63946,64020]  
gtgtagtaaccatgttggctgggtacctgacttcactcaggatttcg  
cgggttcgattcctgtctagcacac

1-9tRNA-Lys(ctt)[64443,64518]  
gcctcgtagctcagttggtagagctgccgactcttaacggtaggtcac  
aggttcaagtcctgtacgggtacca

1-10tRNA-Cys(gca)[65700,65772]  
gccgttggtgccagtggttaggtgccaggctgcaaacctggttagtcgc  
gttcgattcgcggggacggctcc

1-11tRNA-Asn(gtt)[66041,66114]  
tcctccgtagctcaattggcagagcgcgactgtaatcgctggttgg  
tgggtcgagtcacccgttgagc

1-12tRNA-Lys(ttt)[66308,66382]  
gccctatagctcagttggtagagcaggagacttttaattctcgggtcct  
aggttcgatccctagtgggggcacc

>KX585253.1 Mycobacterium phage HedwigODU, complete genome

1-tRNA-Trp(cca)[1003,1076]  
gggtgtgtagctcaatcggtagagcagcggtctcaaagccgccgttgc  
acgttcgagtcgtgccgcgccgc

>KX585252.1 Mycobacterium phage HortumSL17, complete genome

1-tRNA-Glu(ctc)[5906,5978]  
ggtccgttgagtagcggcaactcatctgactctcactcagaagatcgcg  
ggttcaaatccgcacggactac

>KX585251.1 Mycobacterium phage Waterfoul, complete genome

1-tRNA-Trp(cca)[843,918]

atgcaggtagctcaattggtagagcagcggctctccaaaccgccggtgc

aggttcgagtcctgccctgtgtgcc

>KX670788.1 Mycobacterium phage Louie6, complete genome

1-tRNA-Asn(gtt)[3922,3997]

tgatctgtagctcaatcggcagagcaccggctgtaaccgggacgttgg

aggttcgagtcctcccagatcagcca

1-2tRNA-Trp(cca)[4038,4112]

aggcacgtagctcaattggcagagcagcggctctcaaagccgccggctg

caggttcgagtcctgccgtgtctgc

1-3tRNA-Leu(cag)[4147,4221]

ggctcggtaggcaaacaggcaaagccgcctgtctcaggaacaggtgcgtg

agggttcgactccctcccgagctac

>KX550082.1 Rhodococcus phage Natosaleda, complete genome

1-tRNA-Asn(gtt)[1503,1576]

tcacgtatagctcaatcggcagagcaacgcactgttaaggcgggggttga

aggttcgagtccttctacgtgagc

1-3tRNA-Trp(cca)[1702,1776]

gggcacgtagctcaattggatagagccccggctctcaaagccgggtggtg

ggggttcgagtcctccgggcctgc

>KX574455.1 Mycobacterium phage Pomar16, complete genome

1-tRNA-Asn(gtt)[4209,4283]

tgacgtgtagctcaatggcagagcatccggctgtaaccggacggttgaa

ggttcgagtccttctctgcagcca

1-2tRNA-Trp(cca)[4324,4397]

gtacacgtagctcaattggtagagcagtggtctccaaagccgccggttcc

aggttcgactcctggcgtgtatgc

1-3tRNA-Gln(ctg)[4449,4521]

tccccgttcgtctaatacggtgaagacgcctggctctggaccaggttaattga

ggttcgagtccttggcggggagc

1-4tRNA-Glu(ctc)[4555,4628]

ggtcccttggagtagcggagaactcatctggccctcaccagaagatcgc

gggttcgaatcccgcagggactac

1-5tRNA-Tyr(gta)[4632,4712]

cgcgagatacccaagcggcaacgggatctgactgtaaatcagacgcttcg

gcttcgcaggttcgagtcctgtctcgcgac

>KX641261.1 Mycobacterium phage Isiphiwo, complete genome

1-tRNA-Asn(gtt)[5402,5474]

tgacgtgtagctcaatggcagagcaccggctgtaaccggacggttgaa

ggttcgagtccttccatgtcagc

1-2tRNA-Trp(cca)[5479,5552]

gcgcctctagctcaattggtagagcagcggctctcaaagccgcgagttcc

aggttcgagtcctggggagcgtgc

1-3tRNA-Gln(ctg)[5594,5666]  
 tcctcgttcgtctaatacggtgaagacacccggctctggacccggcaatcga  
 gggtcagtccttgatggggagc

>KX641263.1 Mycobacterium phage Kalpine, complete genome  
 1-1tRNA-Trp(cca)[6137,6210]  
 gggcgtgtagtcaattggtagagcagcggctctcaaagccgcccgttcc  
 aggttcgaatcctggcgggcccgc  
 1-2tRNA-Glu(ctc)[6245,6318]  
 gctcccttggagtagcggttaactcatctgactctcaatcagaagatcgc  
 gggttcgaacccgcagggagtac

>KX641264.1 Mycobacterium phage LindNT, complete genome  
 1-1tRNA-Trp(cca)[979,1052]  
 ggggtcgtagctcaatcggtagagcagcggctctcaaagccgcccgttgc  
 acgttcgagtcgtgccgcgcccgc

>KX641260.1 Mycobacterium phage Stasia, complete genome  
 1-1tRNA-Trp(cca)[3994,4067]  
 aggcacgtagctcaatcggtagagcagcggctctcaaagccgcccgttgc  
 aggttcgagtcctgccgtgtctgc

>KX611788.1 Rhodococcus phage Harlequin, complete genome  
 1-1tRNA-Asn(gtt)[1503,1576]  
 tcacgtatagctcaatcggcagagcaacgcactgttaaggcgggggttga  
 aggttcgagtccttctacgtgagc  
 1-3tRNA-Trp(cca)[1702,1776]  
 gggcacgtagctcaattggatagagccccggctctcaaagccggtggttg  
 ggggttcgagtcctccgggcctgc

>KX576638.1 Mycobacterium phage Gruunaga, complete genome  
 1-1tRNA-Asn(gtt)[5396,5468]  
 tggcgtgtagtcaatggcagagccccggctgttaaccgggtggttga  
 gggttcgagtcctccacgccagc  
 1-2tRNA-Trp(cca)[5472,5545]  
 gcgttcctagctcaattggtagagcagcggctctcaaagccgctgttcc  
 aggttcgagtcctggggagcgtgc  
 1-3tRNA-Gln(ctg)[5587,5659]  
 tcctcgttcgtctaatacggtgaagacacccggctctggacccggtaatcga  
 gggttcgagtccttgatggggagc

>KX834009.1 Mycobacterium phage Goldilocks, complete genome  
 1-1tRNA-Arg(cct)[62292,62375]  
 atggcccgtagctcagtcaggtagagcagccttgccttgcgggcttgg  
 ttcgtccccggttcaaatccgggcgggccttgcc  
 1-2tRNA-Gly(tcc)[62378,62450]  
 gcgcccgtggtcgaattggaaagactcctggcttcacccaggttatgca  
 gggttcgagtcctgtcgggcgctc

>KX845404.2 Klebsiella phage vB\_Kpn\_IME260, complete genome  
 1-1tRNA-Trp(cca)[30293,30369]

attccccgagtggtactggacagcacgccggtctccaaaaccgtgcagta  
ggagttcgagtcctctggggttgcca  
1-2tRNA-Thr(tgt)c[31163,31238]  
gcctcaatagctcagccgggagagcaaccgccttgaagcggtaggtcgt  
gggttcgattcctacttggggcacca  
1-3tRNA-Pro(tgg)c[31244,31320]  
ttccccttagctcagtttggtagagcgggcgcttgggagcgtcaggtca  
agtgttcaatcacttaggggagacca  
1-4tRNA-Leu(taa)c[31578,31663]  
acctctgtggtggaactggtatacacaccatgcttaaacgtggcgctt  
aaatgattgaggggtcgagtcctccagaggtacca  
1-5tRNA-Phe(gaa)c[32653,32730]  
gcaactgtagctcagcgaggtgagagcactggttgaaagtcagggggtc  
gttcgttcaaatcgaaccggtgcacca  
1-6tRNA-Lys(ttt)c[32906,32981]  
agatcgctagcttaatggttagagcactcgcctttaagcgataggtcc  
gggttcgagtcgccggcggtctacca  
1-7tRNA-Cys(gca)c[33168,33241]  
gcatcattggccgagtgactaggcagaggcttgcaaacctcgcagcatg  
gttaaaatccatgatggtgctcca  
1-8tRNA-Asn(gtt)c[33322,33397]  
gagagaagcagtaagtggatatggcggtcgcctgtaagcgaatgacagt  
gagttcgaatctcacctctcccgcca  
1-9tRNA-Tyr(gta)c[33507,33593]  
ggggaatatctgtaagtggtagcagagcgggtctgtaaaatcgttgccat  
tgcggctcgggtggttcgactccatcttccccacca  
1-10tRNA-Asp(gtc)c[33830,33906]  
gcggctatggtgttcagcgggtcaacataccggcctgtcacgtcggagcca  
cgggttcgaatcccgttagccgcgcca  
1-11tRNA-Val(tac)c[35476,35551]  
acttgcttagctcaatcggtagagcatcgttttacacggcgaggtagc  
tggttcgaaaccagcagcaagtacca  
1-12tRNA-Met(cat)c[35555,35631]  
ggtcagttggcagagatggttatgcactcgcttcatacgtgagactaca  
gtggttcgagtcactattgaccacca  
1-13tRNA-Ile(gat)c[35637,35712]  
gcttcgatagctcagttggtagagcaaacgaccgataatcgtaggtcac  
tggttcgagtcagttcggagtacca  
1-14tRNA-Met(cat)c[36088,36164]  
tgcaccgtagaggagaggccgtcctcgccagtcataagctggagatcg  
caagttcgaatcttgccggagcatcca  
1-15tRNA-Gln(ctg)c[36167,36242]  
tggggtatagctcagtaggtagagcggaggtctctgaagccttaggtcac  
aagttcgattctgttggccctgcca

1-16tRNA-Arg(acg)c[36372,36446]  
gcaccattagttaatggatagaatatagactacgaactctatggtga  
ggttcgattcctcgatggtgtacca  
1-17tRNA-His(gtg)c[36454,36530]  
gggatattatcataactggataatgacctcgattgtggatcgagtctatc  
ttggtcgaatccaagatalccctcca  
1-18tRNA-Ser(gct)c[36913,36999]  
ggaaaactggtgaaattggtagccacacatcactgctaataatgatgatccg  
taagggtatgtagggtcaagtcctacgttttcgcga  
1-19tRNA-Leu(tag)c[37211,37297]  
ggggatgtggcgaattggcagccgcgctagatttaggttctagtgtga  
aataccgtgtgggtcgacccccctccatccctacca  
1-20tRNA-Ala(tgc)c[37305,37383]  
gggggatgggtctgctgggagtgacaccgcacttgcaatgcgggaatca  
gaacggttcaaatccgttatcctccacca  
1-21tRNA-Glu(ttc)c[37657,37733]  
gctcctgtcgtctaagctggttaggacactactctttcacagtgggaaca  
cgggttcgaaccccgctcgggagtagca  
1-22tRNA-Gln(ttg)c[37744,37819]  
aagggaatagccaagtgttacggcatcggcctttgactccgagatcggt  
aggttcaactcctccttcccttgcca  
1-23tRNA-Met(cat)c[38847,38924]  
ggttcgaagctcattgggtatgagcaccgcctcataagcgaaggttag  
gcaggttcgaatcctccgggagccacca  
1-24tRNA-Arg(tct)c[39400,39475]  
gcttccttagctcagagatagcaacggtcttctaaccgtgggtcac  
aggttcgaatcctgtaggagtagca

>KX657793.1 Mycobacterium phage DARTHPhader, complete genome

1-1tRNA-Gln(ctg)[6296,6368]  
tccccggtagtcgaactggcaagacgctcggctctggaccgagagaccga  
ggttcgaatccttgccggggagc  
1-2tRNA-Pro(ggg)c[21030,21120]  
gttgccacgcgggtcgggtctcatctcgaccttgggggactcgaagagcg  
ccaggtggagataccgggtgccagagtcggggtggtgacg

>KX657795.1 Mycobacterium phage DrHayes, complete genome

1-1tRNA-Trp(cca)[985,1058]  
gggtgtgtagctcaatcggtagagcagcgggtctccaaagccgcccgttgc  
acgttcgagtcgtgccgcgccgc

>KX657794.1 Mycobacterium phage SamuelLPlaqueson, complete genome

1-1tRNA-Trp(cca)[985,1058]  
gggtgtgtagctcaatcggtagagcagcgggtctccaaagccgcccgttgc  
acgttcgagtcgtgccgcgccgc

>KX657796.1 Mycobacterium phage Urkel, complete genome

1-1tRNA-Trp(cca)[985,1058]

ggggtgttagctcaatcggtagagcagcggtctccaaagccgccggtgc  
 acgttcgagtcgtgccgcgccgc  
 >KX808129.1 Mycobacterium phage Sabinator, complete genome  
 1–1tRNA–Asn(gtt)[3838,3913]  
 tgatctgtagctcaactggcagagcaccggctgtaaccgggtcgttg  
 aggttcgagtcctcccagatcagcca  
 1–2tRNA–Trp(cca)[3954,4028]  
 aggcacgtagctcaattggtcagagcagcggtctccaaagccgccggtg  
 cagggtcgagtcctgccgtgtctgc  
 1–3tRNA–Leu(cag)[4063,4137]  
 ggctcggtaggcaaacaggcaaagccgcctgtctcaggaacagggtcgtg  
 agggttcgactccctcccgagctac  
 >KX817173.1 Mycobacterium phage Tuco, complete genome  
 1–1tRNA–Arg(cct)[63996,64079]  
 atggcccgtagctcagtcaggtagagcagccttcccccttgccggttg  
 ttcgtccccgggtcaaatacggcgggcggccttgcc  
 1–2tRNA–Gly(tcc)[64082,64154]  
 gcgcccgtggtcgaattggaaagactcctggcttcccccagggttatgca  
 ggttcgagtcctgtcgggcgctc  
 >KX897981.1 Mycobacterium phage StarStuff, complete genome  
 1–1tRNA–Asn(gtt)[4209,4283]  
 tgacgtgtagctcaatggcagagcatccggctgtaaccggacggttgaa  
 ggttcgagtccttctcgtcagcca  
 1–2tRNA–Trp(cca)[4324,4399]  
 gtacacgtagctcaattggtagagcagtggtctccaaagccgccggttcc  
 aggttcgactcctggcgtgtatgcca  
 1–3tRNA–Gln(ctg)[4407,4479]  
 tccccgttcgtctaatacggtaagacgcctggctctggaccaggtaattga  
 ggttcgagtccttgccgggggagc  
 1–4tRNA–Glu(ctc)[4514,4587]  
 ggtcccttgagtagcggagaactcatctggccctcaccagaagatcgc  
 gggttcgaatcccgcagggactac  
 1–5tRNA–Tyr(gta)[4591,4671]  
 cgcgagatacccaagcggcaacgggatctgactgtaaatcagacgcttcg  
 gcttcgaggttcgagtcctgctctcgcgac  
 >KY087992.1 Mycobacterium phage Mitti, complete genome  
 1–1tRNA–Arg(gcg)[14120,14213]  
 tcggcgcgctgcgcaggagatgggcagcagcgttcgcgccaccctgtcg  
 aacctcaaggcggcctattcgcggttcggtgccgagctgtcggg  
 1–2tRNA–Lys(ttt)[30768,30843]  
 gccccgctagctcaatcggaagagcagccggctttaaccggcgggtacg  
 gagatcgaaactccggcggggcacca  
 >KY087993.1 Mycobacterium phage Hammy, complete genome  
 1–1tRNA–Trp(cca)[809,884]



gggttcctagctcaattggtagagcagcggtctccaaagccgccggttgc  
aggttcgactcctgcggagcccacca  
1-2tRNA-Lys(ctt)[32806,32885]  
gcacttttggctggtgagctaccgtaacaggcagactcttaacagcggg  
tccgggggttcgaaacctgacggcgacca

>KY130461.1 Mycobacterium phage Taptic, complete genome

1-1tRNA-Gly(tcc)[51204,51275]  
gcgcgactggtgtaactggaacacaaccttccagcgggaggtcccc  
gttcgtgacgggggtcgcgctc

>KY223999.1 Mycobacterium phage MrMagoo, complete genome

1-1tRNA-Trp(cca)[57182,57253]  
atgggcgtagctgacaggaagcaacggtctccaaagccgtgacacgcag  
gttcgaatcctgccgccgtgc  
1-2tRNA-Asn(gtt)[57783,57858]  
tggggtatagccacaatggcagtgccaccgggctgtaactcggaagagt  
gttggttcgagtcagctaccctagc  
1-3tRNA-Arg(tcg)[58707,58778]  
cggatagtcgtccagcggggcggtgggttttgcgcgagcccacgagcag  
gttcgaatcctgactttccggc  
1-4tRNA-Tyr(gta)[58851,58936]  
ctcgtctctctctattggtgaagtgatctcaggctgtaaccctgagccc  
tgcgggggttggtggttcgaatccatcaggcgagac  
1-5tRNA-Gln(ctg)[59225,59296]  
tgtcttctcgactaacggcaagtcaccaggctctgaccctggcaattgag  
gttcgaatccttgggggacaac  
1-6tRNA-Pro(tgg)[59302,59374]  
cgggatattggtgtaagggttagcgtaccggcgttgagaccggaagacat  
ggttcgagtcctatgtatcccgc  
1-7tRNA-Phe(gaa)[59819,59891]  
cgtgtttagctcagttggaagagcggcggttgaaaacccgcaggccca  
ggttcggctcctggcatcacggc  
1-8tRNA-Met(cat)[60032,60103]  
tgcgcggtggtgtaacgggaacatcctggtctcataagtcagggttcgg  
gttcgaatcccggctgcgcaac  
1-9tRNA-Arg(acg)[60409,60487]  
cccgatgttagcaacggagcgtcaatgggctacgaacccatattcgca  
tgcagggttcgaatcctgtcatcgggtcca  
1-10tRNA-His(gtg)[60490,60562]  
cctctttagctcaatggaagagcagcggtttgtgagaccgcagacgacg  
gatcgttaccgtccagggggacc  
1-11tRNA-Cys(gca)[60749,60821]  
gtcgagatgactgagtgataagtagcggcctgcaaagctgacttacgcc  
ggttcgaatccggctctcgattc  
1-12tRNA-Leu(tag)[61075,61151]

ggatctgtagcccaaatggaagaggcaacaggcttagaccctgttcagt  
tgggttcgactccctccagattcacca  
1-13tRNA-Leu(caa)[61153,61228]  
gtcgcactaggcaaaactaggcaaagccgcaggcctcaaacgccagtgtt  
gtgagttcgaatctcacgtcgagtac  
1-14tRNA-Lys(ctt)[61232,61306]  
gggatgttggtataaacggcaattactgcagactcttaatctgtcaaac  
tgggttcgaatcccaggcgtccac  
1-15tRNA-Ile(gat)[61307,61382]  
tgtgatgtcgtccaacggttagggcaccgatctgatacatcgaaacca  
gggttcaactccctgcttactacca  
1-16tRNA-Gly(tcc)[61470,61546]  
ggggtattcatctagtctggctcaggatgcgacactccactgtcgtcac  
gagggttcgaatccttcatactcacc  
1-17tRNA-Val(tac)[61593,61664]  
tccccactcgtccaatgggagggcaccgcgttacaacgcgaggacggga  
gttcgattctctcgtggggaac  
1-18tRNA-Thr(agt)[61725,61802]  
gctggatttgctcatgttggttgagcacctacctagtaagtaggagtac  
gtcgggttcgattccgacatccagcccca  
1-19tRNA-Ala(tgc)[61861,61931]  
gggcgcagtgtccaaggtggcgaccgacctgtcaaggtggtgggcgag  
ttcgattctcgtcgttccac  
1-20tRNA-Asp(gtc)[62009,62084]  
cccgatcatctagaggcctaggatgccactctgtcgaagtgtcacac  
gggttcaaatcccgttggcgggacca  
1-21tRNA-Glu(ctc)[62144,62215]  
ggttcattggtgtaatggcagcatcgagggttcaacctgttgcaggg  
gatcgtaacccctatgaactac

>KY224000.1 Mycobacterium phage Rich, complete genome

1-1tRNA-Arg(ccg)[35149,35243]  
cccggcaagttctggcactggtggggcaccaacacctccgacgagtggt  
gggaccggtcgagcccggccagcgggtcaacctcgcctaccgggc

>KY380102.1 Mycobacterium phage CREW, complete genome

1-1tRNA-Trp(cca)[1053,1126]  
gggtgtgtagctcaatcggtagagcagcgggtctccaaagccgccggttgc  
acgttcgagtcgtgccgcgccgc

>KY303907.1 Enterococcus phage EF-P29, complete genome

1-1tRNA-Trp(cca)[24880,24952]  
tgcgttgaagtgtaatggctgcacaatgggtcctccaaaccattagagag  
ggttcgactccttcacaacgtgt

>KY319168.1 Mycobacterium phage CrystalP, complete genome

1-1tRNA-Arg(cct)[63089,63172]  
atggcccgtagctcagtcaggtagagcagccttggcccttgcgggcttgg

ttctccccgggtcaaatacgggcgggccttgcc  
 1–2tRNA–Gly(tcc)[63175,63247]  
 gcgcccgtggtcgaattggaaagactcctggctccacccaggttatgca  
 ggttcgagtcctgtcgggcgctc  
 >KX130960.1 Escherichia phage vB\_EcoS-IME253, complete genome  
 1–1tRNA–Arg(tct)[11634,11711]  
 gctctgtagctcaacagtagcagcaacaccttctaagtcgtaggtt  
 actgggtcgaatccagtgcggagcgcca  
 >KY398841.1 Escherichia phage vB\_Ecos\_CEB\_EC3a, complete genome  
 1–1tRNA–Arg(tct)[4662,4739]  
 gctctgtagctcaacaggacagcagcaacaccttctaagtcgtaggtt  
 actgggtcgaatccagtgcggagcgcca  
 >KY549152.1 Mycobacterium phage Maxxinista, complete genome  
 1–1tRNA–Arg(cct)[62523,62606]  
 atggcccgtagctcagtcaggtagagcagccttcccccttgcgggcttgg  
 ttctccccgggtcaaatacgggcgggccttgcc  
 1–2tRNA–Gly(tcc)[62609,62681]  
 gcgcccgtggtcgaattggaaagactcctggctccacccaggttatgca  
 ggttcgagtcctgtcgggcgctc  
 >KY549153.1 Rhodococcus phage Angryorchard, complete genome  
 1–1tRNA–Asn(gtt)[1496,1569]  
 tcacgtatagctcaatcggcagagcaacgcactgtaaggcgggggttga  
 aggttcgagtccttctacgtgagc  
 1–2tRNA–Trp(cca)[1647,1721]  
 gggcacgtagctcaattggatagagccccggctctcaaagccggtggttg  
 ggggttcgagtcctccgggcctgc  
 >KY549154.1 Rhodococcus phage BobbyDazzler, complete genome  
 1–1tRNA–Asn(gtt)[1503,1576]  
 tcacgtatagctcaatcggcagagcagcgactgtaaggcgttggtga  
 aggttcgagtccttctacgtgagc  
 1–3tRNA–Trp(cca)[1766,1840]  
 gggcacgtagctcaattggatagagccccggctctcaaagccggtggttg  
 ggggttcgagtcctccgggcctgc  
 >KY464936.1 Mycobacterium phage Idleandcovert, complete genome  
 1–1tRNA–Asn(gtt)[3721,3794]  
 tgacgttagctcaatcggcagagcaccggctgtaaccgggcggttga  
 aggttcgagtccttccatgtcagc  
 1–2tRNA–Trp(cca)[3829,3902]  
 aggcgctgtagctcaattggaagagcagcggtctcaaagccgccgctgc  
 aggttcgagccctgccgctctgc  
 >KY471269.1 Gordonia phage DinoDaryn, complete genome  
 1–1tRNA–Lys(ttt)[24013,24086]  
 gccctttagctcagttggtagagctggtgacttttaactactaggtcgt  
 aggttcgagtcctacagggggcac

>KY471268.1 *Gordonia* phage Huffy, complete genome  
1-tRNA-Lys(ttt)c[24013,24086]  
gcccccttagctcagttggtagagctggtgacttttaactactaggtcgt  
aggttcgagtcctacagggggcac

>KY472224.1 *Enterococcus* phage EF-P10, complete genome  
1-tRNA-Trp(cca)c[21555,21627]  
tgcgttgtaagtgaatggctgcacaatggctcctccaaaccattagagag  
ggttcgactccttcacaacgtgt

>KY471460.1 *Mycobacterium* phage Jabith, complete genome  
1-tRNA-Trp(cca)[6115,6188]  
gcactctagctcaattggtagagcagcggtctccaaagccggttcc  
aggttcaagtcctggggagtggtgc

>KY555142.1 *Caulobacter* phage Ccr10, complete genome  
1-tRNA-Trp(cca)[47810,47885]  
gtcggctagctcatgggtagagcggcggtctccaaaccgcgctggc  
aggttcgagtcctcgcgaccggcgcca  
1-2tRNA-Gly(gcc)[47891,47965]  
gcgtccatcgtatatgggttattgcttcgcttgccaacgcgacgaaccg  
ggttcgagtcctccggtggacgtcca  
1-3tRNA-Gly(tcc)[47972,48045]  
gcgggtatagctcaaggagagctactgcctccaagcagaagatgcgg  
gttcgagccccgctatccgtcca  
1-4tRNA-Glu(ttc)[48202,48279]  
ggccccggtcgtctagcgggttcgagattcgtgactttcaatcacgagag  
cggagttcaggtcctccgtcgggcctcca  
1-5tRNA-Asp(gtc)[48301,48375]  
ggtgcgttcgtatatcggtaatactccgattgtcgatccggcaagagg  
ggttcgattcccctacgcaccgcca  
1-6tRNA-Pro(cgg)[49245,49320]  
cggggtgtagctcagtcggtagagcgtcgggtcgggaccgagaggccgt  
gggttcgagtcctccgccaccagacca  
1-7tRNA-Pro(ggg)[49328,49402]  
cgggatgtagctcagcggtagagcgcggctgggggcccgcgaggccgca  
ggttcgagacctgccacccgacca  
1-8tRNA-Thr(ggt)[49408,49480]  
gctgctgcgcctggatcggcgccggccccttggtatggggaagtagaagg  
ttcaattcctccagcagcacca  
1-9tRNA-Lys(ctt)[49593,49679]  
ggatgtgtcacctcagtggcgagaggaccgggctcttaatccggcagcga  
aagctcatcgtgggttcgagtcaccacatcctcca  
1-10tRNA-Lys(ttt)[49685,49775]  
gcacgagtgacccgagtggcgaaggcgctcgacttttaatagactaggcg  
tccgcgcctcaccgaggttcgagtcctcctcgtgtcca  
1-11tRNA-Leu(cag)[49782,49865]

gcgaaagtggcggaacggcagacgcactgggtctcaggtaccagcgacttc  
ggatcatgagggttcgaatccctcctttcgtacca  
1-12tRNA-Leu(caa)[49873,49957]  
gccggctctggcggaatggcagacgcagtggttcaagtcccaccgcctt  
cgggctgcccgttcgagccggggaccggcacca  
1-13tRNA-Leu(gag)[49963,50051]  
tgcaagtggcggaacttggtagacgcaccggcatgagaggccggcgcc  
cttcggggctgaggggttcgagtccttcttcgcacca  
1-14tRNA-Ala(tgc)[50135,50205]  
ggggtatgcgcagggcgaggcatccttgcagggaagtcggggtgggtt  
cgagtcccacatactccacca  
1-15tRNA-Ser(cga)[50210,50297]  
ggtaggttggtctgagaggccgaaggcgcccgttcgaaaacgggaggacc  
gcaaggttcgtgggttcgaatcccacacctaccca  
1-16tRNA-Ser(gga)[50302,50389]  
ggatgtatggctgagaggccgaaggcgcccgttgaaagcgggtgaacc  
gcaaggttcgtaggttcgaatcctactgcaccccca  
1-17tRNA-Phe(gaa)[51084,51159]  
ggactctagctcagcaggtagagcgccggttgaaaccccgaggtcgg  
aggttcgactcctcccgtttccacca  
1-18tRNA-Val(gac)[51165,51240]  
gcccgatgagccagatgggaaggcgccgcccgcacatggcgggattgaga  
aggttcgattccttcacagcacca  
1-19tRNA-Ile(gat)[51243,51318]  
gcaagtgtagctcagttggtagacgcggaccgataatccgccgtccc  
tggttcgagtcaggcatttcacca  
1-20tRNA-Ile(gat)[51326,51400]  
tgtggcatagctcaggggtagagcgcgcttgataagcgtgaggacggg  
ggttcgaagccctctgccactacca  
1-21tRNA-Val(cac)[51434,51509]  
tggcgttagcatagtgagggtgcagggtgtcacatacctcgatgaac  
tggttcgattccagtaacgccaacca  
1-22tRNA-Gln(ctg)[51515,51588]  
tgagggttcgtctaacggtaggacggctgggtctggtccagctaatttag  
gttcgagtcctagcccctcatcca  
1-23tRNA-Gln(ttg)[51597,51672]  
tcagggttagtttagctggtaaacactgggtttggccccggcgtcgt  
aggttcgaagcctgcaccctgatcca  
1-24tRNA-Ile(aat)[51684,51758]  
tccagtcattgcacaaggtgtgcagcggcactgttaatgcctgtgagccc  
ggttcgattccggggtctggagcca  
1-25tRNA-Arg(tct)[51961,52038]  
gcgcaggtagctcaacggaccagagcgaccgttctctacacggagggtt  
gggggttcgaatccctccttcgcgcacca

1-26tRNA-Cys(gca)c[101366,101454]  
gcttcggtggactgagaggttaggcgcgggattgcaaatctctgctgggtg  
ggaacacctatgaggggttcgagtcctcccgaagctcca  
1-27tRNA-Gly(tcc)c[102034,102107]  
tttcgaatagcacagtggtagtgcaacagccgtcctagctgtcggtcgc  
gggttcaatccccgcttcgalgaa  
1-29tRNA-Met(cat)[103180,103258]  
cgcggggtagaggagtcgggtgtcctcgtctggctcataaccaggagat  
cgtgggttcaaatcccactcccgtccca  
1-30tRNA-Met(cat)[103630,103714]  
ggtagcgtggctcgacaggttaaggcatcggcctcataagccgagggttcg  
tcccaatcctgggttcaaatccaggctgtacctcca

>KY555143.1 Caulobacter phage Ccr2, complete genome

1-1tRNA-Trp(cca)[48285,48360]  
gtcggctagctcatgggtagagcggcgggtctccaaaccgcgcgtggc  
aggttcgagtcctcgcgaccggcgcca  
1-2tRNA-Gly(gcc)[48366,48440]  
gcgtccatcgtatatgggttattgcttcgcttgccaacgcgacgaaccg  
ggttcgagtcgggtggacgtcca  
1-3tRNA-Gly(tcc)[48447,48520]  
gcgggtatagctcaaggagagctactgcctccaagcagaagatgcgg  
gttcgagccccgtatccgtcca  
1-4tRNA-Glu(ttc)[48677,48754]  
ggccccgtcgtctagcgggttcgaggattcgtgactttcaatcacgagag  
cggagttcgagtcctcgtcgggcctcca  
1-5tRNA-Asp(gtc)[48776,48850]  
ggtgcgttcgtatatcggtaatactccgattgtcgatccggcaagagg  
ggttcgattcccctacgcaccgcca  
1-6tRNA-Pro(cgg)[49720,49795]  
cggggtgtagctcagtcggtagagcgtcgggtcgggaccgagaggccgt  
gggttcgagtcgccccaccagacca  
1-7tRNA-Pro(ggg)[49803,49877]  
cgggatgtagctcagcggtagagcgcggctgggggccgcgaggccgca  
ggttcgagacctgccacccgacca  
1-8tRNA-Thr(ggt)[49883,49955]  
gctgctgcgcctggatcggcgcggccccttggtatggggaagtagaagg  
ttcaattcctccagcagacca  
1-9tRNA-Lys(ctt)[50068,50154]  
ggatgtgtcacctcagtcggcagaggaccgggctcttaatccggcagcga  
aagctcatcgtgggttcgagtcaccacatcctcca  
1-10tRNA-Lys(ttt)[50160,50250]  
gcacgagtgacccgagtcggcgaaggcgtcgacttttaatagactaggcg  
tccgcgcctcaccgaggttcgagtcctcctcgtgtcca  
1-11tRNA-Leu(cag)[50257,50340]

gcgaaagtggcggaacggcagacgcacttggtctcaggtaccagcgacttc  
ggcatgaggggtcgaatccctcctttctacca  
1-12tRNA-Leu(caa)[50348,50432]  
gccggctctggcggaatggcagacgcagtggttcaagtcaccgcctt  
cgggcgtcccgttcgagccggggaccggcacca  
1-13tRNA-Leu(gag)[50438,50526]  
tgcgaagtggcggaacttggtagacgcaccggcatgagaggccggcgcc  
cttcggggcgtgaggggttcagtccttcttcgcacca  
1-14tRNA-Ala(tgc)[50610,50680]  
ggggtatgcgcagggcgaggcatccttgcagggaagtcgggtgggtt  
cgagtcacatactccacca  
1-15tRNA-Ser(cga)[50685,50772]  
ggtaggttggtcagagggccgaaggcgccggttcgaaaacgggaggacc  
gcaaggtccgtgggttcgaatccacacctacctca  
1-16tRNA-Ser(gga)[50777,50864]  
ggatgtatggctgagagggccgaaggcgccgcttgaaagcgggtgaacc  
gcaaggtccgtaggttcgaatcctactgcatccgcca  
1-17tRNA-Phe(gaa)[51559,51634]  
ggactcgtagctcagcaggtagagcgccggttgaaccccgaggtcgg  
aggttcgactcctcccgtttccacca  
1-18tRNA-Val(gac)[51640,51715]  
gcccgatgagccagatgggaaggcgccgccgacatggcgggattgaga  
aggttcgattccttcacagcacca  
1-19tRNA-Ile(gat)[51718,51793]  
gcaagtgtagctcagttggtagacgagcgaccgataatccgccgtccc  
tggttcgagtcaggcatttcacca  
1-20tRNA-Ile(gat)[51801,51875]  
tgtggcatagctcaggggtagagcgcgcttgataagcgtgaggacggg  
ggttcgaagccctctgccactacca  
1-21tRNA-Val(cac)[51909,51984]  
tggcgttagcatagtgggagtcaggggttcacatacctcgatcgaac  
tggttcgattccagtaacgccaacca  
1-22tRNA-Gln(ctg)[51990,52063]  
tgagggctcgtctaacggtaggacggctgggtcgtgtccagctaatttag  
gttcgagtcctagcccctcatcca  
1-23tRNA-Gln(ttg)[52072,52147]  
tcagggttagtttagctggtaaacactgggtttggccccggcgctcgt  
aggttcgaagcctgcaccctgatcca  
1-24tRNA-Ile(aat)[52159,52233]  
tccagtcfaatgcacaaggtgtgcagcggcactgttaatgcctgtgagccc  
ggttcgattccggggtctggagcca  
1-25tRNA-Arg(tct)[52436,52513]  
gcgcaggtagctcaacggaccagagcgaccgttctctacacggagggtt  
gggggttcgaatccctccttcgcgcacca

1-26tRNA-Cys(gca)c[101841,101929]  
gcttcgggtggactgagaggttaggcgcgggattgcaaatctctgctgggtg  
ggaacacctatgaggggttcgagtcctccccaagctcca  
1-27tRNA-Gly(tcc)c[102509,102582]  
tttcgaatagcacagtggtagtgcaacagccgtcctagctgtcggtcgc  
gggttcaatccccgcttcgalgaa  
1-29tRNA-Met(cat)[103655,103733]  
cgcggggtagaggagtcgggttgtcctcgtctggctcataaccaggagat  
cgtgggttcaaatcccactcccgtccca  
1-30tRNA-Met(cat)[104105,104189]  
ggtagcgtggctcgacaggtgaaggcatcggcctcataagccgagggttcg  
tcccaatcctgggttcaaatccaggtcgtacctcca

>KY55145.1 *Caulobacter* phage Ccr29, complete genome

1-1tRNA-Trp(cca)[52818,52893]  
gtcggctagctcatgggtagagcggcgggtctccaaaaccgcgcgtggc  
aggttcgagtcctcgcgaccggcgcca  
1-2tRNA-Gly(gcc)[52899,52973]  
gcgtccatcgtatatgggttattgcttcgcttgccaacgcgacgaaccg  
ggttcgagtcgggtggacgtcca  
1-3tRNA-Gly(tcc)[52980,53053]  
gcgggtatagctcaaggagagctactgcctccaagcagaagatgcgg  
gttcgagccccgctatccgtcca  
1-4tRNA-Glu(ttc)[53210,53287]  
ggccccggtcgtctagcgggttcgaggattcgtgactttcaatcacgagag  
cggagttcgagtcctcgtcgggcctcca  
1-5tRNA-Asp(gtc)[53309,53383]  
ggtgcgttcgtatatcggtaatactccgattgtcgatccggcaagagg  
ggttcgattcccctacgcaccgcca  
1-6tRNA-Pro(cgg)[54253,54328]  
cggggtgtagctcagtcggtagagcgtcgggtcgggaccgagaggccgt  
gggttcgagtcgcccccaccagacca  
1-7tRNA-Pro(ggg)[54336,54410]  
cgggatgtagctcagcggtagagcgcggctgggggccgcgaggccgca  
ggttcgagacctgccacccgacca  
1-8tRNA-Thr(ggt)[54416,54488]  
gctgctgcgcctggatcggcgcggccccttggtatggggaagtagaagg  
ttcaattccttcagcagcacca  
1-9tRNA-Lys(ctt)[54601,54687]  
ggatgtgtcacctcagtcggcagagaggaccgggtcttaatccggcagcga  
aagctcatcgtgggttcgagtcaccacatcctcca  
1-10tRNA-Lys(ttt)[54693,54783]  
gcacgagtgacccgagtcggcgaaggcgctgacttttaatagactaggcg  
tccgcgcctcaccgaggttcgagtcctcctcgtgtcca  
1-11tRNA-Leu(cag)[54790,54873]



gcgaaagtggcggaacggcagacgcactgggtctcaggtaccagcgacttc  
ggatcatgagggttcgaatccctcctttctgacca  
1-12tRNA-Leu(caa)[54881,54965]  
gccggctctggcggaatggcagacgcagtggttcaagtcccaccgcctt  
cgggctgcccgttcgagccggggaccggcacca  
1-13tRNA-Leu(gag)[54971,55059]  
tgcaagtggcggaacttggtagacgcaccggcatgagaggccggcgcc  
cttcggggctgaggggttcgagtccttcttcgcacca  
1-14tRNA-Ala(tgc)[55143,55213]  
ggggtatgcgcagggcgaggcatccttgcagggaagtcgggtgggtt  
cgagtcccacatactccacca  
1-15tRNA-Ser(cga)[55218,55305]  
ggtaggttggtctgagaggccgaaggcgcccgttgcgaaacgggaggacc  
gcaaggtccgtgggttcgaatcccacacctacctcca  
1-16tRNA-Ser(gga)[55310,55397]  
ggatgtatggctgagaggccgaaggcgcccgttggaagcgggtgaacc  
gcaaggttccgtaggttcgaatcctactgcacccgcca  
1-17tRNA-Phe(gaa)[56092,56167]  
ggactctagctcagcaggtagagcgccggttgaaaccccgaggtcgg  
aggttcgactcctcccgtttccacca  
1-18tRNA-Val(gac)[56173,56248]  
gcccgatgagccagatgggaaggcgccgcccgcacatggcgggattgaga  
aggttcgattccttcacagcacca  
1-19tRNA-Ile(gat)[56251,56326]  
gcaagtgtagctcagttggtagacgcggaccgataatccgccgtccc  
tggttcgagtcaggcatttcacca  
1-20tRNA-Ile(gat)[56334,56408]  
tgtggcatagctcaggggtagagcgcgcttgataagcgtgaggacggg  
ggttcgaagccctctgccactacca  
1-21tRNA-Val(cac)[56442,56517]  
tggcgtttagcatagtgagggtgcagggtgtcacatacctcgatcgaac  
tggttcgattccagtaacgccaacca  
1-22tRNA-Gln(ctg)[56523,56596]  
tgagggttcgtctaacggtaggacggctgggtctggtccagctaatttag  
gttcgagtcctagcccctcatcca  
1-23tRNA-Gln(ttg)[56605,56680]  
tcagggttagtttagctggtaaacactgggtttggccccggcgctcgt  
aggttcgaagcctgcaccctgatcca  
1-24tRNA-Ile(aat)[56692,56766]  
tccagtcfaatgcacaaggtgtgcagcggcactgttaatgcctgtgagccc  
ggttcgattccgggtctggagcca  
1-25tRNA-Arg(tct)[56969,57046]  
gcgcaggtagctcaacggaccagagcgaccgttctctacacggagggtt  
gggggttcgaatccctccttcgcgcacca

1-26tRNA-Cys(gca)c[106374,106462]

gcttcggtggactgagaggttaggcgcgggattgcaaatctctgctgggtg  
ggaacacctatgagggttcgagtcctcccgaagctcca

1-27tRNA-Gly(tcc)c[107042,107115]

tttcgaatagcacagtggtagtgcaacagccgtcctagctgtcggtcgc  
gggttcaatccccgcttcgalgaa

1-29tRNA-Met(cat)[108188,108266]

cgcgggtagaggagtcgggtgtcctcgtctggctcataaccaggagat  
cgtgggttcaaateccactcccgtccca

1-30tRNA-Met(cat)[108638,108722]

ggtagcgtggctcgacaggttaaggcatcggcctcataagccgagggttcg  
tcccaatcctgggtcaaateccaggtcgtacctcca

>KY555146.1 Caulobacter phage Ccr32, complete genome

1-1tRNA-Trp(cca)[47830,47905]

gtcggctagctcatgggtagagcggcgggtctccaaaaccgcgcgtggc  
aggttcgagtcctcgcgaccggcgcca

1-2tRNA-Gly(gcc)[47911,47985]

gcgtccatcgtatatgggttattgcttcgcttgccaacgcgacgaaccg  
ggttcgagtcgggtggacgtcca

1-3tRNA-Gly(tcc)[47992,48065]

gcggatatagctcaaggagagctactgcctccaagcagaagatgcgg  
gttcgagccccgctatccgtcca

1-4tRNA-Glu(ttc)[48222,48299]

ggccccgtcgtctagcgggttcgaggattcgtgactttcaatcacgagag  
cggagttcaggtcctcgtcgggcctcca

1-5tRNA-Asp(gtc)[48322,48396]

ggtgcgttcgtatatcggtaatactccgattgtcgatccggcaagagg  
ggttcgattcccctacgcaccgcca

1-6tRNA-Pro(cgg)[49836,49911]

cggggtgtagctcagtcggtagagcgtcgggtcgggaccgagaggccgt  
gggttcgagtcgcccccaccagacca

1-7tRNA-Pro(ggg)[49919,49993]

cgggatgtagctcagcggtagagcgcggctgggggccgcgaggccgca  
ggttcgagacctgccacccgacca

1-8tRNA-Lys(ctt)[50184,50270]

ggatgtgtcacctcagtggcgagaggaccggccttaatccggcagcga  
aagctcatcgtgggttcgagtcaccacatacctcca

1-9tRNA-Lys(ttt)[50277,50367]

gcacagtgtagccgagcggcgaaggcgtcgacttttaatcgactaggcg  
tccgcgcctaccgagggttcgagtcctcctcgtgctcca

1-10tRNA-Leu(cag)[50374,50457]

gcgaaagtggcggaacggcagacgcactggtctcaggtaccagcgacttc  
ggatcatgagggttcgaatccctcctttctacca

1-11tRNA-Leu(caa)[50465,50549]

gccggtctggcggaatggcagacgcagtggttcaagtcaccgcctt  
cgggcgctcccggttcgagccggggaccggcacca  
1-12tRNA-Leu(gag)[50555,50643]  
tgcgaagtggcggaacttggtagacgcaccggcatgagaggccggcgcc  
cttcggggcgtaggggttcgagtccttcttcgcacca  
1-13tRNA-Ala(tgc)[50727,50797]  
ggggtatgcgcagggcgagggcatccttgaaggaagtcgggtgggtt  
cgagtcacacatactccacca  
1-14tRNA-Ser(cga)[50802,50889]  
ggtaggttggtctgagaggccgaaggcgccgttcgaaaacgggaggacc  
gcaaggttcgtaggggttcgaatccacacctacctca  
1-15tRNA-Ser(gga)[50894,50981]  
ggatgatggctgagaggccgaaggcgccgcttgaaagcgggtgaacc  
gcaaggttcgtaggttcgaatcctactgcatccgcca  
1-16tRNA-Phe(gaa)[51675,51750]  
ggactcgtagctcagcaggtagagcgccgcttgaaccccgaggtcgg  
aggttcgattcctcccgttccacca  
1-17tRNA-Val(gac)[51756,51831]  
gcccgatgagccagatgggaaggcgccgctgacatggcgggattgaga  
aggttcgattccttcatcaggcacca  
1-18tRNA-Ile(gat)[51834,51909]  
gcaagtgtagctcagtcggtagagcagcgaccgataatccgctgtccc  
tgggtcaggtccaggcatttcacca  
1-19tRNA-Ile(gat)[51917,51991]  
tgtggcatagctcagggtagagcgcgcttgataagcgtgaggtcggg  
ggttcgaagccctctgccactacca  
1-20tRNA-Val(cac)[52025,52100]  
tggcgtttagcatagtgggagtcaggggtgtcacatacctcgatcgaac  
tgggtcgattccagtaacccaacca  
1-21tRNA-Gln(ctg)[52106,52179]  
tgagggttcgtctaacggtaggacggctgggtctggtccagctaattag  
gttcgagtcctagcccctcatcca  
1-22tRNA-Gln(ttg)[52187,52260]  
tctcgggtggtctaattggaagacatctggtttggtccagaggattggg  
gttcgattccttgcccgagaacca  
1-23tRNA-Ile(aat)[52276,52350]  
tccagtcfaatgcacaaggtgtgcagcggcactgttaatgcctgtgagccc  
ggttcgattccgggtctggagcca  
1-24tRNA-Gly(tcc)[52553,52630]  
gcgcgggtagctcaatggaccagagcagccgtctccacacggaaggtt  
gggggttcgaatccctccccgtgcgcca  
1-26tRNA-Cys(gca)c[102013,102101]  
gcttcggtggactgagaggttaggcgcgggattgcaaatctctgctggtg  
ggaacacctatgagggttcgagtcctcccgaagctcca

1-27tRNA-Gly(tcc)[102681,102754]  
 ttgcgaatagcacagtggtagtgcacagccgtcctagctgtcggtcgc  
 gggttcaatccccgcttcgatgaa  
 1-29tRNA-Met(cat)[103827,103905]  
 cgcgggtagaggagtcggttgtctcgtctggctcataaccaggagat  
 cgtgggttcaaatccactcccgtccca  
 1-30tRNA-Met(cat)[104272,104356]  
 ggtacggtggctcgacaggttaaggcatcggcctcataagccgagggttcg  
 tcccaatcctgggttcaatccaggtcgtacctcca  
 >KY555147.1 Caulobacter phage Ccr34, complete genome  
 1-1tRNA-Trp(cca)[48270,48345]  
 gtcggttagctcatgggtagagcggcgggtcctcaaaaccgcgcgtggc  
 aggttcgagtcctcgcgaccggcgcca  
 1-2tRNA-Gly(gcc)[48351,48425]  
 gcgtccatcgtatatgggttattgcttcgcttgccaacgcgacgaaccg  
 ggttcgagtcctccgggtggacgtcca  
 1-3tRNA-Gly(tcc)[48432,48505]  
 gcggatatagctcaaaggagagctactgccttccaagcagaagatgcgg  
 gttcgagccccgctatccgtcca  
 1-4tRNA-Glu(ttc)[48662,48739]  
 ggccccgtcgtctagcggtttcgaggattcgtgactttcaatcacgagag  
 cggagttcgagtcctccgtcgggcctcca  
 1-5tRNA-Asp(gtc)[48762,48836]  
 ggtgcgttcgtatatcggtcaatactccgattgtcgatccggcaagagg  
 ggttcgattcccctacgcaccgcca  
 1-6tRNA-Pro(cgg)[50276,50351]  
 cggggtgtagctcagtcggtagagcgtcgggtcgggaccgagaggccgt  
 gggttcgagtcctccgccaccagacca  
 1-7tRNA-Pro(ggg)[50359,50433]  
 cgggatgtagctcagcggtagagcgcggtcggggccgagggccgca  
 ggttcgagacctgccacccgacca  
 1-8tRNA-Lys(ctt)[50624,50710]  
 ggatgtgtcacctcagtggcgagaggaccggctcttaatccggcagcga  
 aagctcatcgtgggttcgagtcaccacatcctcca  
 1-9tRNA-Lys(ttt)[50717,50807]  
 gcacgagtgacccgagcggcgaaggcgctgacttttaatcgactaggcg  
 tccgcgcctaccgagggttcgagtcctcctcgtgtcca  
 1-10tRNA-Leu(cag)[50814,50897]  
 gcgaaagtggcggaacggcagacgcactggtctcaggtaccagcgacttc  
 ggtcatgagggttcgaatccctcctttctgtacca  
 1-11tRNA-Leu(caa)[50905,50989]  
 gccggtctggcggaatggcagacgcagtggttcaagtcccaccgcctt  
 cggggtcccgggttcgaggccgggaccggcacca  
 1-12tRNA-Leu(gag)[50995,51083]

tgcgaagtggcggaactttggtagacgcaccggcatgagaggccggcgcc  
cttcggggcgtgaggggttcgagtccttcttcgcgacca  
1-13tRNA-Ala(tgc)[51167,51237]  
gggggtatgcgcagggcgcaggcatcctttgcaaggaagtcggggtgggtt  
cgagtccacatactccacca  
1-14tRNA-Ser(cga)[51242,51329]  
ggtaggttggtgagaggccgaaggcggcgttcgaaaacgggaggacc  
gcaaggttcggtgggttcgaatcccacacctacctcca  
1-15tRNA-Ser(gga)[51334,51421]  
ggatgtatggctgagaggccgaaggcggcgttggaagcgggtgaacc  
gcaaggttcgtaggttcgaatcctactgcatccgcca  
1-16tRNA-Phe(gaa)[52115,52190]  
ggactcgtagctcagcaggtagagcggcgttgaaacccggaggtcgg  
aggttcgattcctcccgtttccacca  
1-17tRNA-Val(gac)[52196,52271]  
gcccgatgagccagatgggaaggcggcggcgtgacatggcgggattgaga  
aggttcgattccttcacagcacca  
1-18tRNA-Ile(gat)[52274,52349]  
gcaagtgtagctcagtcggtagagcagcggaccgataatccgctgtccc  
tgggtcaggtccaggcattgcacca  
1-19tRNA-Ile(gat)[52357,52431]  
tgtggcatagctcaggggtagagcgcgcttgataagcgtgaggtcggg  
ggttcgaagccctctgccactacca  
1-20tRNA-Val(cac)[52465,52540]  
tggcggttagcatagtgggagtcaggggtgtcacatacctcgatcgaac  
tgggtcgattccagtaacgccaacca  
1-21tRNA-Gln(ctg)[52546,52619]  
tgagggttcgtctaacggtaggacggctgggtctggtccagctaattag  
gttcgagtcctagcccctcatcca  
1-22tRNA-Gln(ttg)[52627,52700]  
tctcgggtggtctaattggaagacatctggtttggtccagaggattggg  
gttcgattccttggccgagaacca  
1-23tRNA-Ile(aat)[52716,52790]  
tccagtcgaatgcacaaggtgtgcagcggcactgttaatgcctgtgagccc  
ggttcgattccgggtctggagcca  
1-24tRNA-Gly(tcc)[52993,53070]  
gcgcgggtagctcaatggacccagagcagccgtctccacacggaaggtt  
gggggttcgaatccctccccgtgcgcca  
1-26tRNA-Cys(gca)c[102453,102541]  
gcttcggtggactgagaggttaggcgcgggattgcaaatctctgctggtg  
ggaacacctatgaggttcgagtcctcccgaagctcca  
1-27tRNA-Gly(tcc)c[103121,103194]  
tttcgaatagcacagtggtagtgcaacagccgtcctagctgtcggtcgc  
gggttcaatccccgcttcgatgaa

1-29tRNA-Met(cat)[104267,104345]  
 cgcggggtagaggagtcggttgtcctcgtctggctcataaccaggagat  
 cgtgggttcaatcccactcccgtccca  
 1-30tRNA-Met(cat)[104712,104796]  
 ggtacgggtggctcgacaggttaaggcatcggcctcataagccgagggttcg  
 tccaatcctgggttcaatccaggctgtacctcca  
 >KY555144.1 Caulobacter phage Ccr5, complete genome  
 1-1tRNA-Trp(cca)[47682,47757]  
 tcggtctagctcatggggtagagcggcgtctccaaaaccgcgcgtggc  
 aggttcgagtcctcgaccggcgcca  
 1-2tRNA-Gly(gcc)[47763,47837]  
 gcgtccatcgtatatgggttattgcttcgcttgccaacgcgacgaaccg  
 ggttcgagtcgggtggacgtcca  
 1-3tRNA-Gly(tcc)[47844,47917]  
 gcggatatagctcaaaggagagctactgcctccaagcagaagatgcgg  
 gttcgagccccgctatccgtcca  
 1-4tRNA-Glu(ttc)[48074,48151]  
 ggccccggtcgtctagcggtttcgaggattcgtgactttcaatcacgagag  
 cggagttcgagtcctcgtcgggcctcca  
 1-5tRNA-Asp(gtc)[48175,48249]  
 ggtgcgttcgtatatcggtaataactcggattgtcgatccggcaagagg  
 ggttcgattcccctacgcaccgcca  
 1-6tRNA-Pro(cgg)[49110,49185]  
 cggggtgtagctcagtcggtagagcgtcgggtcgggaccgagaggccgt  
 ggggttcgagtcggccaccagacca  
 1-7tRNA-Pro(ggg)[49193,49267]  
 cgggatgtagctcagcggtagagcgcggctggggccgcgagggccgca  
 ggttcgagacctgccacccgacca  
 1-8tRNA-Lys(ctt)[49456,49542]  
 ggatgtgtcacctcagtcggcgagaggaccgggtcttaatccggcagcga  
 aagctcatcgtgggttcgagtcaccacacatcctcca  
 1-9tRNA-Lys(ttt)[49548,49637]  
 gcacgagtgacccgagcggcgaaggcgctgacttttaatcgactgggcg  
 tccagcctcaccgaggggttcgagtcctcctcgtgtcca  
 1-10tRNA-Leu(cag)[49644,49729]  
 gcgaaagtggcggaacaaggtagacgcaccggtctcaggtaccggcggct  
 tcggtcatgagggttcgagtcctcctttcgtacca  
 1-11tRNA-Leu(caa)[49737,49821]  
 gccggtctggcggaatggcagacgcagtcggttcaagtcaccgcctt  
 cgggcgtcccgttcgatccggggaccggcacca  
 1-12tRNA-Leu(gag)[49828,49915]  
 tgcgaagtggcggaatttggtagacgcaccggcatgagaggccggcgccc  
 ttcggggcgtgagggttcgagtccttcttcgcgacca  
 1-13tRNA-Ala(tgc)[50006,50076]

ggggtatgcgcagggcgaggcatccttgcaaggaagtcggggtgggtt  
cgagtccacatactccacca  
1-14tRNA-Ser(cga)[50081,50168]  
ggtaggttggctgagaggccgaaggcgccgcttcgaaaacgggagaact  
gcaaggttccgtgggttcgaatcccacacctacctcca  
1-15tRNA-Ser(gga)[50173,50260]  
ggatgtatggctgagaggccgaaggcgccgcttggaagcgggtgaacc  
gcaaggttccgtaggttcgaatcctactacatccgcca  
1-16tRNA-Phe(gaa)[50956,51031]  
ggactcgtagctcagcaggtagagcgccggcttgaaccccgagggtcgg  
aggttcgattcctcccgtttccacca  
1-17tRNA-Val(gac)[51037,51112]  
gcccgatgagccagatgggaaggcgccgccgtgacatggcgggattgaga  
aggttcgattcctcatcaggcacca  
1-18tRNA-Ile(gat)[51115,51190]  
gcaagtgtagctcagtcggtagagcagcgaccgataatcccccgtccc  
tggttcgagtcaggcatttcacca  
1-19tRNA-Ile(gat)[51198,51272]  
tgtggcatagctcagggtagagcgcgcttgataagcgtgaggtcggg  
ggttcgaagccctctgccactacca  
1-20tRNA-Val(cac)[51306,51381]  
tggcgtttagcatagtgggagtgagggtgtcacatacctcgatcgaac  
tggttcgattccagtaacgccaacca  
1-21tRNA-Gln(ctg)[51387,51460]  
tgagggttcgtctaattggtaggacggctgggtctggtccagctaattctag  
gttcgagtcctagccccctcatcca  
1-22tRNA-Gln(ttg)[51468,51541]  
tctcgggtgggtctaattggaagacatctggttttggtccagaggattggg  
gttcgattccttggccgagaacca  
1-23tRNA-Ile(aat)[51557,51631]  
tcagtcfaatgcacaaggtgtgcagcgccactgttaatgcctgtgagccc  
ggttcgattccggggtctggagcca  
1-24tRNA-Arg(tct)[51834,51911]  
gcgcgggtagctcaatggaccagagcagccgtcttctacacggtgggtt  
gggggttcgaatccctccccgtgcgcca  
1-25tRNA-Cys(gca)c[101727,101815]  
gcttcggtggactgagaggttaggcgcgggattgcaaatctctgctggtg  
ggaacacctatgagggttcgagtcctcccgaagctcca  
1-26tRNA-Lys(ctt)c[102395,102468]  
tttcgaatagcacagtggtagtgcaacagcccttaagctgtcggtcgc  
gggttcaatccccgcttcgatgaa  
1-28tRNA-Met(cat)[103541,103619]  
cgcggggtagaggagtcgggtgtcctcgtctggctcataaccaggagat  
cgtgggttcaatcccactcccgtccca

1-29tRNA-Met(cat)[103986,104070]  
 ggtagcgtggctcgacaggtgaagcgcctcgcctcataagccgagggttcg  
 tcccaatcctggttcaaatccaggtcgtagctcca

>KY619305.1 Escherichia phage vB\_EcoS\_ESCO41, complete genome  
 1-1tRNA-Arg(tct)[7289,7366]  
 gctccgctagctcaattggaaagaagcaacgaccttctaagtcgtaggtt  
 actggttcgaacccagtcgaggcgcca

>KY677846.1 Escherichia phage phiLLS, complete genome  
 1-1tRNA-Arg(tct)[44136,44210]  
 cggggtgtagtctaaggagaggcaggagtcttctaattcctttatgca  
 ggttcgaatcctgtcacctcgcca  
 1-2tRNA-Ser(gct)[47745,47833]  
 ggaagaatagcataacggtattgcagcagattgctaactgtcggttga  
 aatatagccttgggttcgattcccgcttctccgcca  
 1-3tRNA-Leu(taa)[48133,48209]  
 gggggtgtaatcgaattggcataggtactggactaaaattcaggtttg  
 tgggttcgaatcccaccacctacca  
 1-4tRNA-Tyr(gta)[49157,49244]  
 gggcggtttattccgtaagtggtagcggagggttgaatccctggta  
 ttgcgactcgagtggttcgactccattaacgcccacca  
 1-5tRNA-Glu(ttc)[49252,49326]  
 gcacctatcgtctagcggtaggacaccactcttcacagtgggaacacg  
 agttcgaccctcgttgggtgtgcca  
 1-6tRNA-Phe(gaa)[49413,49487]  
 gcacctttagctgagatggattagcgttgcctgaagagcttgagaggt  
 cgttcgattcgaacagggtgcacca  
 1-7tRNA-Cys(gca)[49847,49922]  
 cgaccgttggctgaatggcttaggcgaaggattgcaaatccttttatgt  
 gattcaaatctcatcggtcgtcca  
 1-8tRNA-Asn(gtt)[50439,50516]  
 ggttccttagctctaattggtagagcggcatctgttaagttgagggt  
 gctggttcgaatccagcaggaaccgcca  
 1-9tRNA-Asp(gtc)[50814,50890]  
 gcgaccggggtggttggtatgttactcccctgtcacgggagggaatg  
 tgggttcaaatcccatcggtcgcca  
 1-10tRNA-Pro(tgg)[52062,52139]  
 ctccgtgtagctcagtttggccagagcgttctgttggggcgatagggtc  
 gggggttcaaatcctcccacggagacca  
 1-11tRNA-Met(cat)[52146,52223]  
 tgcgggttagatctctggtagagatcgctagtctcataagctagaagag  
 gtaggttcgattcctgcaccgctcca  
 1-12tRNA-Lys(ttt)[52413,52491]  
 agatcgctagctcaataggttagtagcatccgactttaatcggaaggt  
 tctgggttcgagtcaggcgatctacca



1-13tRNA-Ala(tgc)[52872,52948]  
 ggggaatgggtctgcatggagtggacacctcgcttgaccaggagacatca  
 gaacggttcgattccgttattctccac  
 1-14tRNA-Leu(tag)[52956,53032]  
 gcgtgattgatggaattggcatacataccgtccttagaagtcgggtttg  
 agggttcgaatccctgtcacgcacca  
 1-15tRNA-His(gtg)[53708,53784]  
 ttggctatatcataattggtaatgatcctgattgtgaatcaggcctatg  
 tggattcgaattccactagccaccca  
 1-16tRNA-Gln(ctg)[54018,54093]  
 tgggatgtagatcaattggcagatcgtcggcctctgactccgaaggttcc  
 acgttcgatccgtggcatcccagcca  
 1-17tRNA-Gln(ttg)[54100,54175]  
 ttggagagtagtgaacggtagcacaacggccttgactccgttaatggt  
 aggttcgattcctccttccagcca  
 1-18tRNA-Gly(tcc)[54746,54817]  
 gcggttagcctcatggtggggactcagcctccaagctgatggagagggt  
 tcgattccctctagccgctcca  
 1-19tRNA-Thr(tgt)[55253,55327]  
 gctcctaaagcattgctggcgatgcagttgcctgtgaagcatcgaaccg  
 ggttcgattcctggtgggagcacca  
 1-20tRNA-Ile(gat)[55708,55784]  
 gcttcgtagcttagcgatctaaagcactcggccgataaccgagagatcg  
 ggggtttaaaccctcccggagtacca  
 1-21tRNA-Met(cat)[55881,55956]  
 agttagtggcagagtggttatgcacctccttcatacggagcgactacag  
 tggttcaaatccactactaactacca

>KY554768.1 Lactococcus phage AM1, complete genome

1-1tRNA-Arg(tct)[46773,46845]  
 gttcggtagtgtaattggataacacacataatttctaattatgtactct  
 ggattcgagttccagactgagca  
 1-3tRNA-Asp(gtc)[47568,47638]  
 ggcttattagtatatgggtactacacatccctgtcacggaggagaaccga  
 gttcgagtctcgataagccg  
 1-4tRNA-Pro(tgg)[47987,48058]  
 caggatatagtgttaatggtagcatgcgtgtttgggaacatgtagtgtt  
 ggttcgagtcagctatcctga  
 1-5tRNA-Trp(cca)[49122,49197]  
 ttggttgtagctcagttggtagtagcactagtctccaaaactaggtgtc  
 gtgagttcgaatctcacccaatcagt  
 1-6tRNA-Trp(cca)[49372,49443]  
 atccgtttagtgtaggtagcacatcagattccaaacctgataacgtg  
 ggttcgattcctacaatggata

>KY554775.1 Lactococcus phage AM11, complete genome

1-1tRNA-Arg(tct)[46546,46618]  
gttcggttagtgaattggataacacacataatttctaattatgtactct  
ggattcgagttccagactgagca  
1-3tRNA-Asp(gtc)[47341,47411]  
ggcttattagtatatgggtactacacatccctgtcacggaggagaaccga  
gttcgagtcctcgataagccg  
1-4tRNA-Pro(tgg)[47760,47831]  
caggatatagtgttaatggtagcatgcgtgtttgggaacatgtagtgtt  
ggttcgagtcagctatcctga  
1-5tRNA-Trp(cca)[48895,48970]  
ttggttggtagctcagttggtagtagcactagtctccaaaactaggtgtc  
gtgagttcgaatctcacccaatcagt  
1-6tRNA-Trp(cca)[49145,49216]  
atccgtttagtgtagtggttagcacatcagattccaaacctgataacgtg  
ggttcgattcctacaatggata

>KY554776.1 Lactococcus phage AM12, complete genome

1-1tRNA-Arg(tct)[46527,46599]  
gttcggttagtgaattggataacacacataatttctaattatgtactct  
ggattcgagttccagactgagca  
1-3tRNA-Asp(gtc)[47322,47392]  
ggcttattagtatatgggtactacacatccctgtcacggaggagaaccga  
gttcgagtcctcgataagccg  
1-4tRNA-Pro(tgg)[47741,47812]  
caggatatagtgttaatggtagcatgcgtgtttgggaacatgtagtgtt  
ggttcgagtcagctatcctga  
1-5tRNA-Trp(cca)[48876,48951]  
ttggttggtagctcagttggtagtagcactagtctccaaaactaggtgtc  
gtgagttcgaatctcacccaatcagt  
1-6tRNA-Trp(cca)[49126,49197]  
atccgtttagtgtagtggttagcacatcagattccaaacctgataacgtg  
ggttcgattcctacaatggata

>KY554769.1 Lactococcus phage AM2, complete genome

1-1tRNA-Arg(tct)[46770,46842]  
gttcggttagtgaattggataacacacataatttctaattatgtactct  
ggattcgagttccagactgagca  
1-3tRNA-Asp(gtc)[47565,47635]  
ggcttattagtatatgggtactacacatccctgtcacggaggagaaccga  
gttcgagtcctcgataagccg  
1-4tRNA-Pro(tgg)[47984,48055]  
caggatatagtgttaatggtagcatgcgtgtttgggaacatgtagtgtt  
ggttcgagtcagctatcctga  
1-5tRNA-Trp(cca)[49119,49194]  
ttggttggtagctcagttggtagtagcactagtctccaaaactaggtgtc  
gtgagttcgaatctcacccaatcagt

1-6tRNA-Trp(cca)[49369,49440]  
atccgtttagttagtggttagcacatcagattccaaacctgataacgtg  
ggttcgattcctacaatggata

>KY554770.1 Lactococcus phage AM3, complete genome  
1-1tRNA-Arg(tct)[47147,47219]  
gttcggttagtgaattggataacacacataatttctaattatgtactct  
ggattcgagttccagactgagca  
1-3tRNA-Asp(gtc)[47942,48012]  
ggcttattagtatatgggtactacacatccctgtcacggaggagaaccga  
gttcgagtcctcgataagccg  
1-4tRNA-Pro(tgg)[48361,48432]  
caggatatagtgttaatggtagcatgcgtgtttgggaacatgtagtgtt  
ggttcgagtcagctatcctga  
1-5tRNA-Trp(cca)[49496,49571]  
ttggttgtagctcagttgtagtagcactagtctccaaaactaggtgtc  
tgagttcgaatctcacccaatcagt  
1-6tRNA-Trp(cca)[49746,49817]  
atccgtttagttagtggttagcacatcagattccaaacctgataacgtg  
ggttcgattcctacaatggata

>KY554771.1 Lactococcus phage AM4, complete genome  
1-1tRNA-Met(cat)[29760,29832]  
ggttctatagcttagatggtaaagtcctctgcccataacagagttaacgc  
aggttcaagccctgctagaacca  
1-2tRNA-Arg(tct)[31584,31657]  
gttcggttagtcaattggatagagtattcgcttctaagcgaaaggta  
tgagttcaagcctcactactgaaca  
1-4tRNA-Pro(tgg)[32560,32631]  
caggatatagtgttaatggtagcatgcgtgtttgggaacatgtagtgct  
ggttcgagtcagctatcctga

>KY554772.1 Lactococcus phage AM5, complete genome  
1-1tRNA-Met(cat)[47715,47787]  
ggttctatagcttagatggtaaagtcctctgcccataacagagttaacgc  
aggttcaagccctgctagaacca  
1-2tRNA-Arg(tct)[49539,49612]  
gttcggttagtcaattggatagagtattcgcttctaagcgaaaggta  
tgagttcaagcctcactactgaaca  
1-4tRNA-Pro(tgg)[50515,50586]  
caggatatagtgttaatggtagcatgcgtgtttgggaacatgtagtgct  
ggttcgagtcagctatcctga

>KY554766.1 Lactococcus phage AM6, complete genome  
1-1tRNA-Pro(tgg)c[61438,61511]  
caggatatagctcagcttggttagagcactgcttttgggaagcaggggtca  
gaggttcaaatcctttatcttga  
1-2tRNA-Thr(tgt)c[61576,61649]

gccgatttagctcagtttggtagagcgtctgatttgaatcagagggtca  
caggttcaagtcctgtagtcggca  
1-3tRNA-Asn(gtt)c[61705,61777]  
tgaccatagctcagttggtagagcgtcgactgttaatgcgaatgctgt  
aggttcgagtcctactgggtcag  
1-4tRNA-Cys(gca)c[61883,61955]  
ctccctgtggccgagtggttaggtgcagctctgcaaaagctgatacgtt  
ggttcgaatccgactagggagtc

>KY554767.1 Lactococcus phage AM7, complete genome

1-1tRNA-Pro(tgg)c[61636,61709]  
caggatatagctcagcttggtagagcactgcttttggaagcaggggtca  
gaggttcaatccttttatctga  
1-2tRNA-Thr(tgt)c[61774,61847]  
gccgatttagctcagtttggtagagcgtctgatttgaatcagagggtca  
caggttcaagtcctgtagtcggca  
1-3tRNA-Asn(gtt)c[61903,61975]  
tgaccatagctcagttggtagagcgtcgactgttaatgcgaatgctgt  
aggttcgagtcctactgggtcag  
1-4tRNA-Cys(gca)c[62081,62153]  
ctccctgtggccgagtggttaggtgcagctctgcaaaagctgatacgtt  
ggttcgaatccgactagggagtc

>KY554773.1 Lactococcus phage AM8, complete genome

1-1tRNA-Arg(tct)[46543,46615]  
gttcggtagtgaattggataacacacataatttctaattatgtactct  
ggattcgagttccagactgagca  
1-3tRNA-Asp(gtc)[47338,47408]  
ggcttattagatatgggtactacacatccctgtcacggaggagaaccga  
gttcgagtcctcgataagccg  
1-4tRNA-Pro(tgg)[47757,47828]  
caggatatagtgttaatggtagcatgcgtgttttggaacatgtagtgt  
ggttcgagttccagctatcctga  
1-5tRNA-Trp(cca)[48892,48967]  
ttggttggtagctcagttggttagtagcactagtctccaaaactaggtgtc  
tgagttcgaatctcacccaatcagt  
1-6tRNA-Trp(cca)[49142,49213]  
atccgttagttagtggttagcacatcagattccaaacctgataacgtg  
ggttcgattcctacaatggata

>KY554774.1 Lactococcus phage AM9, complete genome

1-1tRNA-Arg(tct)[46544,46616]  
gttcggtagtgaattggataacacacataatttctaattatgtactct  
ggattcgagttccagactgagca  
1-3tRNA-Asp(gtc)[47339,47409]  
ggcttattagatatgggtactacacatccctgtcacggaggagaaccga  
gttcgagtcctcgataagccg

1-4tRNA-Pro(tgg)[47758,47829]  
caggatatagtgttaatggtagcatgcgtgtttgggaacatgtagtgt  
ggttcgagtcagctatcctga  
1-5tRNA-Trp(cca)[48893,48968]  
ttggttgtagctcagttggtagtagcactagtctccaaaactaggtgtc  
gtgagttcgaatctcacccaatcagt  
1-6tRNA-Trp(cca)[49143,49214]  
atccgttagttagtggttagcacatcagattccaacctgataacgtg  
ggttcgattcctacaatggata

>KY554762.1 Lactococcus phage LW31, complete genome

1-1tRNA-Thr(tgt)c[60012,60085]  
gccgatttagctcagttggtagagcgtctgattgtaacagagggtca  
caggttcaagtcctgtagtcggca  
1-2tRNA-Asn(gtt)c[60142,60214]  
tgacctatagctcagttggtagagcgtcgactgttaatgcgaatgtcgt  
aggttcgagtcctactgggccag  
1-3tRNA-Cys(gca)c[60381,60452]  
ggtcttatagtggaaggctaacacaggagactgcaaactctaatcgtc  
ggttcaaaccgactaggacct

>KY554763.1 Lactococcus phage LW32, complete genome

1-1tRNA-Thr(tgt)c[59622,59695]  
gccgatttagctcagttggtagagcgtctgattgtaacagagggtca  
caggttcaagtcctgtagtcggca  
1-2tRNA-Asn(gtt)c[59752,59824]  
tgacctatagctcagttggtagagcgtcgactgttaatgcgaatgtcgt  
aggttcgagtcctactgggccag  
1-3tRNA-Cys(gca)c[59991,60062]  
ggtcttatagtggaaggctaacacaggagactgcaaactctaatcgtc  
ggttcaaaccgactaggacct

>KY554764.1 Lactococcus phage LW33, complete genome

1-1tRNA-Thr(tgt)c[59359,59432]  
gccgatttagctcagttggtagagcgtctgattgtaacagagggtca  
caggttcaagtcctgtagtcggca  
1-2tRNA-Asn(gtt)c[59489,59561]  
tgacctatagctcagttggtagagcgtcgactgttaatgcgaatgtcgt  
aggttcgagtcctactgggccag  
1-3tRNA-Cys(gca)c[59728,59799]  
ggtcttatagtggaaggctaacacaggagactgcaaactctaatcgtc  
ggttcaaaccgactaggacct

>KY554765.1 Lactococcus phage LW4, complete genome

1-1tRNA-Thr(tgt)c[59678,59751]  
gccgatttagctcagttggtagagcgtctgattgtaacagagggtca  
caggttcaagtcctgtagtcggca  
1-2tRNA-Asn(gtt)c[59808,59880]

tgaccatagctcagttggtagagcgtgcactgttaatgcgaatgtcgt  
aggttcagtcctactgggccag  
1-3tRNA-Cys(gca)[60047,60118]  
ggctctatagtgaaggctaacacaggagactgcaaatctctaactgtc  
ggttcaaatccgactaggacct

>KY554777.1 Lactococcus phage LW81, complete genome

1-1tRNA-Met(cat)[49462,49534]  
ggttctatagcttagatggtaaagtcctctgccataacagagttaacgc  
aggttcaagccctgctagaacca  
1-2tRNA-Arg(tct)[52085,52158]  
gttcggttagctcaattggatagagtattcgcttctaagcgaaaggta  
tgagttcaagcctcactgaaca  
1-4tRNA-Asp(gtc)[53062,53134]  
ggttgttggtgtagtggttatcacgctgcctgtcacgcaagagaacac  
gggttcgaatcccgtacaaatcg  
1-5tRNA-Trp(cca)[54119,54194]  
ttggttggtagctcagttggtagtagcactagtctccaaactagggtc  
gtgagttcgaatctcacccaatcagt  
1-6tRNA-Trp(cca)[54369,54440]  
atccggttagtgtagtggttagcacatcagattccaaacctgataacgtg  
ggttcgattcctacaatggata  
1-7tRNA-Met(cat)[54660,54733]  
tacgggggtgggtggcaaggagtcacattagttcataggctaaataaggg  
cggttcgattccgtcaccccgat

>KY554760.1 Lactococcus phage R3.4, complete genome

1-1tRNA-Trp(cca)[26909,26981]  
tgcgagcatagtatagtggaatgctacagattccaaacctgtaaacgtg  
ggttcgattcctactgttcgtgt  
1-2tRNA-Pro(tgg)[27035,27106]  
caggatatggtgtcaatggttagcatacgtgtttgggaacatgtggtgtt  
ggttcgagtcagctatcctga

>KY554761.1 Lactococcus phage R31, complete genome

1-1tRNA-Trp(cca)[26702,26774]  
tgcgagcatagtatagtggaatgctacagattccaaacctgtaaacgtg  
ggttcgattcctactgttcgtgt  
1-2tRNA-Pro(tgg)[26828,26899]  
caggatatggtgtcaatggttagcatacgtgtttgggaacatgtggtgtt  
ggttcgagtcagctatcctga

>KY783914.1 Mycobacterium phage GardenSalsa, complete genome

1-1tRNA-Trp(cca)[57182,57253]  
atgggcgtagctgacaggaagcaacggctctccaaagccgtgacacgcag  
gttcgaatcctgccgccgtgc  
1-2tRNA-Asn(gtt)[57783,57858]  
tggggtatagccacaatggcagtgccaccgggctgttaactcggaagagt

gttggttcgagtcagctaccctagc  
1-3tRNA-Arg(tcg)[58707,58778]  
cggatagtcgtccagcggggcggtgggttttcgcgagcccacgagcag  
gttcgaatcctgactttccggc  
1-4tRNA-Tyr(gta)[58851,58936]  
ctcgtctctctctattggtgaagtgatctcaggctgtaaccctgagccc  
tgcgggggtgtggtgggtcgaatccatcaggcgagac  
1-5tRNA-Gln(ctg)[59225,59296]  
tgtcttctcgactaacggcaagtcaccaggctctgaccctggcaattgag  
gttcgaatccttgggggacaac  
1-6tRNA-Pro(tgg)[59302,59373]  
cgggatatggtgtaagggtagcgtaccggcggtggagaccggaagacatg  
gttcgagtcctgtatcccgac  
1-7tRNA-Phe(gaa)[59818,59890]  
cgtgtttagctcagttggaagagcggcggttgaaaacccgaggccca  
ggttcggctcctggcatcacggc  
1-8tRNA-Met(cat)[60031,60102]  
tgcgcggtggtgtaacgggaacatcctggtctcataagtcagggttcgg  
gttcgaatcccggtgcgcaac  
1-9tRNA-Arg(acg)[60408,60486]  
cccgatgttgagcaacggagcgctcaatgggctacgaacccatattcgca  
tgcaggttcgaatcctgtcatcgggtcca  
1-10tRNA-His(gtg)[60489,60561]  
cctctttagctcaatggaagagcagcggtttgtgagaccgcagacgacg  
gatcgttaccgtccagggggacc  
1-11tRNA-Cys(gca)[60748,60820]  
gtcgagatgactgagtgataagtagcggcctgcaaagctgacttacgcc  
ggttcgaatccggctctcgattc  
1-12tRNA-Leu(tag)[61074,61150]  
ggatctgtagcccaaatggaagaggcaacaggcttagaccctgttcagt  
tgggttcgactccctccagattcacca  
1-13tRNA-Leu(caa)[61152,61227]  
gctcgactaggcaaaactaggcaaagccgaggcctcaaaccagtggtt  
gtgagttcgaatctcacgtcgagtac  
1-14tRNA-Lys(ctt)[61231,61305]  
gggatgttggtataaacggcaattactgcagactcttaatctgtcaaac  
tgggttcgaatcccaggcgtccac  
1-15tRNA-Ile(gat)[61306,61381]  
tgtgatgtcgtccaacggttagggcaccgatctgatacatcggaacca  
gggttcaactccctgcttactacca  
1-16tRNA-Gly(tcc)[61469,61545]  
ggggattcatctagtctggctcaggatgcgacactccactgtcgtcac  
gagggttcgaatccttcatactcacc  
1-17tRNA-Val(tac)[61592,61663]

tccccactcgtccaatgggagggcaccgcgcttacaacgcgaggacggga  
 gttcgattctctcgtggggaac  
 1–18tRNA–Thr(agt)[61724,61801]  
 gctggatttgctcatgttggcttgagcacctacctagtaagtaggagtac  
 gtcggttcgattccgacatccagcccca  
 1–19tRNA–Ala(tgc)[61860,61930]  
 gggcgcatgtccaaggtggcgaccgaccctgcaaggtggtgggcgag  
 ttcgattctcgtcgctccac  
 1–20tRNA–Asp(gtc)[62008,62083]  
 cccgtcatcatctagaggcctaggatgccactctgtcgaagtgtcacac  
 gggttcaaatcccgttggcgggacca  
 1–21tRNA–Glu(ctc)[62143,62214]  
 ggttcattggtgtaatggcagcatcgagggttcaacctgttggcaggg  
 gatcgtaaccctatgaactac  
 >KY705261.1 Streptococcus phage P5652, complete genome  
 1–1tRNA–Val(aac)[32001,32092]  
 ggtgaactaggccgtgacaaagaaagtgttaacgcacactatataaagc  
 gatttatatgggctgtgagggtcgactccctcgctcgctg  
 >KF192053.1 Enterococcus phage IME–EF1, complete genome  
 1–1tRNA–Trp(cca)c[39478,39550]  
 tgcgttgaagtgaatggctgcacaatgggtccaaaccattagagag  
 gttcgactccttcacaacgtgt  
 >JF731128.1 Enterococcus phage SAP6, complete genome  
 1–1tRNA–Trp(cca)c[41169,41240]  
 gaggcggttagtgaatggtagcacaacagtctccaaactgtagagag  
 gttcgattccttcactgcttg  
 >KR011064.1 Tsukamurella phage TIN4, complete genome  
 1–1tRNA–Asn(gtt)[12481,12554]  
 tggcatatagctcaatcggcagagctccgactgttaatcggatggttac  
 aggttcaagtctctgttatgccagc  
 >KY965063.1 Mycobacterium phage PurpleHaze, complete genome  
 1–1tRNA–Asn(gtt)[3872,3947]  
 tgacgttagctcaatcggcagagcacccggctgttaaccggcggttga  
 aggttcgagtccttccatgtcagcca  
 1–2tRNA–Trp(cca)[3988,4062]  
 aggcacgtagctcaattggcagagcagcggctcctcaaagccgcccgtg  
 caggttcgagtcctgccgtgtctgc  
 1–3tRNA–Leu(cag)[4097,4171]  
 ggctcggtaggcaaacaggcaaagccgcctgtctcaggaacaggtgcgtg  
 agggttcgactccctcccagctac  
 >JN699628.1 Mycobacterium phage Bongo, complete genome  
 1–1tRNA–Arg(ccg)[32355,32450]  
 ctccacgtggcgaatggcaatgtggcagaggggattccggttcccagggg  
 gcgggggatctcagacttccgcctcggttcgactccgtcgtggtgg



1-2tRNA-Trp(cca)[54782,54853]  
atgggcgtagctgactgggaagcaacggctctcaaagccgtgatatgcag  
gttcgaatcctgccgcccgtgc

1-3tRNA-Asn(gtt)[55903,55976]  
tggcctgtcggtaacggcaaacacgcgcctgttaaggcgtgactcctg  
gttcgaatccaggtaggccagcca

1-4tRNA-Arg(acg)[56531,56604]  
cggaatgtcgtctaacggcaagacgagctggccacgggcaagctgatac  
aggttcgaatcctggctttccggc

1-5tRNA-Tyr(gta)[56609,56686]  
cccgtcgcggattggcgaccaaccctgactgtaaatcaggcgcttcggct  
ctgcaggtcaactcctgacggcgggac

1-6tRNA-Gln(ctg)[56854,56926]  
tgctctctcgtctaactggcaggacaccagaatctgactctggcagttga  
ggttcgaatcctggggagcaac

1-7tRNA-Pro(tgg)[56930,57003]  
ctgggtgaggtgtaagtgggtgcatggccggtttggatccgggcggttcg  
aggttcgagtcctcgcacccagac

1-8tRNA-Ser(gct)[57299,57380]  
gagtgaaccatctaggtggatggccgcgattgctaactgtggggcagcg  
taacgctgtgtggatctgcccactcctctcc

1-9tRNA-Phe(gaa)[57490,57565]  
cgggtttagctcagattggtgagagcgctcggttgaaacccgagagggc  
cctggttcgaatccaggcatcccggc

1-10tRNA-Met(cat)[57653,57724]  
tgcgcggtagtgaaacgggatcacaaggtctcataagcctttattacgg  
gttcgaatcccgtctgcgcaac

1-11tRNA-Arg(acg)[58004,58078]  
ccccccgacgacgacggacgtgcacctcgctacgaacgagaaggctgct  
ggttcgaatccagtcggtgggtcca

1-12tRNA-His(gtg)[58081,58152]  
cctctttagctcaatggtagagccggtttgtgagaccggtgacctgc  
gttcgattcgagcagggggac

1-13tRNA-Cys(gca)[58158,58230]  
ggcgggatggctgagttagataggcggcgggctgaaccccgttcacgcc  
ggggcagatccggctctcgtctc

1-14tRNA-Leu(cag)[58492,58566]  
ggctcgctaggcaaattggaaaagccgctgattcagaatcaggtgttc  
cgagttcgactctcgggcgagctac

1-15tRNA-Lys(ctt)[59586,59659]  
gggacgttggtgaaacggctatcaccgcacgctttaacgtgcagttct  
gggttcgaatcccaggcgtccac

1-16tRNA-Gly(tcc)[59782,59857]  
ggggcattcatctagttaggtcaggatcgacgctccaacgtcgtcac

gagggttcgaatccttcacgctcac  
 1-17tRNA-Val(tac)[59862,59934]  
 tccggattagctcagtggaagagcggcaggtttacacacctgcgcgtgggg  
 agttcgattctctcatccggaac  
 1-18tRNA-Thr(agt)[59938,60010]  
 gccggtatagctcagtggttagagcacctgtctagtaaaccaggagaccag  
 gggtcgattccctgttccggctc  
 1-19tRNA-Asp(gtc)[60125,60200]  
 cccgccatcatctagcggcccaggatgccgccctgtcaggcgggtcacac  
 gggttcaaatcccgttggcgggacca  
 1-20tRNA-Glu(ctc)[60202,60273]  
 gggttcattggtgaacggcagcatgtcacctctcaaggtgaaggcaggg  
 gttcaactcccctatgaactgc  
 >JF937105.1 Mycobacterium phage Rey, complete genome  
 1-1tRNA-Trp(cca)[57088,57160]  
 atgggcgtggcttgataggaaagcagcgggtctccaaagccgccacacgca  
 gggtcgaatcctgccgccctgc  
 1-3tRNA-Asn(gtt)[57913,57986]  
 tggcctgtagcttaattggtagagcagcagctgttaactgccaggtga  
 aggttcgaatccttctagccagc  
 1-4tRNA-Ser(gga)[58475,58546]  
 aaacatttagctcagcagtagagcatctcttggaaatagagacggcggcg  
 gtgcgattccgccaatgtaacc  
 1-5tRNA-Ala(cgc)[58843,58915]  
 cggaatgtgcagcctaattgtaaggcggggagttcgcgactcccgatcca  
 gggttcgagtcctggcgctccggc  
 1-6tRNA-Tyr(gta)[59005,59082]  
 ctgcgcgaattggcgatcacagctgggtgtaactagctccttcgggt  
 gtgcaggttcgactcctgacggcgagac  
 1-7tRNA-Gln(ctg)[59197,59268]  
 tccaggttggtgaatggcagcatggcagaatctgactctgccgattgag  
 gttcgattccttgcctggatc  
 1-8tRNA-Pro(tgg)[59359,59434]  
 cagtcagaggtgtaagtgggtgcatgagcggttggatcgccggggttg  
 gattcgagtcctccagactgacca  
 1-9tRNA-Phe(gaa)[59833,59908]  
 cgggtcgtagctcagtttggcaagagcgtggcttgaaacccagaggcc  
 ccaggttcgactcctggcgttccggc  
 1-10tRNA-Met(cat)[60048,60120]  
 tgcgcggtagtgaatcgggatcacaggagttcatagcttccattatg  
 gggtcgagtcctcatctgcgaac  
 1-11tRNA-Arg(acg)[60409,60487]  
 cccgatgtgagcagtgagcgctcaatgggctacgaacccatattcgca  
 tgcaggttcgaatcctgtcatcgggtcca

1-12tRNA-His(gtg)[60490,60564]  
 cctctttagctcaatcggttagagcagcggttgaagccgagacca  
 cggatcgtaacctgcagggggacc  
 1-13tRNA-Cys(gca)[60672,60744]  
 gtcgagatgacagagtggcgatgtgacggctgcaaagccgatctacgcc  
 gggtcgaatccggctctcgattc  
 1-14tRNA-Leu(tag)[60998,61072]  
 ggatctgtagcccaaatggaagaggcaacaggcttagaccctgttcagt  
 tgggttcgactccctccagattcac  
 1-15tRNA-Leu(caa)[61076,61151]  
 gctcgactaggcaactaggcaagccgcaggcctcaaaagccagtgtt  
 gcgagttcgaatctcgcgtcgagtac  
 1-16tRNA-Lys(ctt)[61189,61260]  
 gggctcgtagctgagtggttagctccgtcctttaagtcggagacgtag  
 gttcgattcctaccgggctcac  
 1-17tRNA-Ile(gat)[61261,61336]  
 tgtgatgtcgtccaacgggttagggcaccgatctgatacatcggaacca  
 ggggtcaactccctgcttactacca  
 1-18tRNA-Gly(tcc)[61425,61500]  
 ggggtattcatctagctggctcaggatgcgacactccactgtcgtcac  
 gaggggtcgaatccttcatacctcac  
 1-19tRNA-Val(tac)[61563,61635]  
 tcgggattagctcagtggaagagcggctggttacaccagcgctgggg  
 agttcgattctctcattccgaac  
 1-20tRNA-Thr(agt)[61696,61773]  
 gctggatttgctcatgttggttgagcacctacctaagtaggagtag  
 gtcggttcgattccgacatccagcccca  
 1-21tRNA-Asp(gtc)[62051,62124]  
 cccgatgtcatctagtggttaggatgccgcctgtcaggcggtcacgc  
 gaggttcaaatctcgtcgtcgggac  
 1-22tRNA-Glu(ctc)[62184,62255]  
 gggtcattggtgtaatggcagcatcccagggttcaacctgtaggcagg  
 gatcgtaaccctatgaactac  
 >JQ512844.1 Mycobacterium phage Twister, complete genome  
 1-1tRNA-Trp(cca)[3802,3877]  
 aggcacgtagctcaattggaagagcagcggtctcaaagccgctgc  
 aggttcgagccctgccgtgtctgcca  
 >JF957060.1 Mycobacterium phage Timshel, complete genome  
 1-1tRNA-Trp(cca)[5374,5449]  
 aggcacgtagctcaactggttagagcagcggtctcaaagccgctggttg  
 ggggttcgagtcctcgggtgtctgcca  
 >JQ684677.1 Mycobacterium phage Tiger, complete genome  
 1-1tRNA-Trp(cca)[4131,4204]  
 gggtcagtagctcaattggttagagcagcggtctcaaagccgagttgg

aggttcgagtcctccctggccgc  
 >JF937106.1 Mycobacterium phage SirDuracell, complete genome  
 1-tRNA-Arg(cct)[61928,62011]  
 atggcccgtagctcagtcaggtagagcagccttgccccttgccggccttgg  
 ttcgtccccgggtcaaatccggcgggccttacc  
 1-2tRNA-Gly(tcc)[62014,62086]  
 gcgcccgtggtcgaattggaaagactcctggcttcacccaggttatgca  
 ggttcgagtcctgtcggcgctc  
 >MF072690.1 Mycobacterium phage Porcelain, complete genome  
 1-tRNA-Gly(tcc)[91633,91705]  
 gcgcttgggtcgaattggaaagactcctggcttcacccaggttatgca  
 ggttcgagtcctgtcagcgctc  
 1-2tRNA-Tyr(gta)[92676,92748]  
 tggcccgtagctcaattggcagagcagccggcggaattcggcgctctc  
 ggttcgagtcggcgggctacc  
 >MF133445.1 Mycobacterium phage Lucky2013, complete genome  
 1-tRNA-Gly(tcc)[90687,90759]  
 gcgcttgggtcgaattggaaagactcctggcttcacccaggttatgca  
 ggttcgagtcctgtcagcgctc  
 1-2tRNA-Tyr(gta)[91730,91802]  
 tggcccgtagctcaattggcagagcagccggcggaattcggcgctctc  
 ggttcgagtcggcgggctacc  
 >MF358541.1 Streptomyces phage Warpy, complete genome  
 1-tRNA-Thr(cgt)[16890,16961]  
 gccccgctggcgtagtggaaacgcactcttctgtaataagagtaaga  
 gttcaattctcttcggggctc  
 1-2tRNA-Gly(tcc)[72410,72482]  
 gcatcggtagtttaatggtagaacgtctgactccaatcagacagcgcg  
 gttcgattcccgtcgggtctcc  
 1-3tRNA-Gln(ctg)[72611,72683]  
 tccccttgggtgaaccggcaacacaacagactctgaatctgaattcct  
 agttcgaatctaggttggggagc  
 1-4tRNA-Trp(cca)[72890,72961]  
 atgtccttctgataatggtagtacaagagattccaaacctcttagcgtgg  
 gttcgattcctacaggacatgc  
 1-5tRNA-Pro(tgg)[73818,73890]  
 caggcacggggaagatggtaatccgttggcttgggaagcctaagacactc  
 ggttcgattccgaggtgcctgac  
 1-6tRNA-Pro(tgg)[73894,73969]  
 cgggatatagctcagtttggtcagagcgtgcatttgggatgcagaagtc  
 gctgggtcgaatccagttatcccagc  
 1-7tRNA-Ile(tat)[76953,77027]  
 gcgccagtagcataacggtccaatgcagtaggcttatatcctaccgagag  
 aaggttcaattcctcctggcgctac

1-8tRNA-Ser(gga)[77536,77621]  
ggaaggtaaagcattggtagcgggtgtcttgaaaggcactaagggtgt  
tacagcccggcagggttcaattccctggccttcgc  
1-9tRNA-Ser(tga)[77861,77950]  
tggaggcacgcattggagtgttatcgggtctgaaaaccgtgatgacgta  
gtgatatgtcgtgggggttcgactccctctgtctccgcc  
1-10tRNA-Asp(gtc)[81078,81154]  
gcgtctgtagtatgtctgggtctaatgcacctgattgtcaatcaggaaat  
cgcggttcaaatcccgtaggcgcgc  
1-11tRNA-Asp(gtc)[81778,81849]  
cccggtgtgtgtaatggtaacatactgcgtgtcagcgcaatgtcgagg  
gttcgattcccttcgtcgggac  
1-12tRNA-Glu(ctc)[86336,86407]  
gcccctatagtctaagggtaggatacaagattctcaatctgtggtcgga  
gttcaattctccgtagggttac  
1-13tRNA-Glu(ttc)[86656,86731]  
gtcccggtagattctgctggtagaatcgctagactttcaatctagagtc  
gagggttcaattcccttcgggttac  
1-14tRNA-Val(tac)[86989,87060]  
gcccgttagtctcaatgggagagcgacggttttacacaccgtatacgggg  
gttcgattccctcagtgggtac  
1-15tRNA-Leu(tag)[87254,87329]  
gcgcggtgacgggaactggcatacctagttgacttagaatcaactgctt  
gggagttcgactctccacggcgtag  
1-16tRNA-Leu(tag)[87488,87562]  
gcgtcggtagcccaatggcaggaggcaccagtcttaggaactggacagtg  
tgagttcgaatctcactcggcgtag  
1-17tRNA-Gly(gcc)[87884,87955]  
tccgtagtgggtgaaatggatcacatggccttgccaaggctaaagcgca  
gttcgattctcgtctacgggac  
1-18tRNA-Arg(tct)[88032,88105]  
gcctcggtagcgtagtggatgacgcggtgccttctaagcatttatagac  
agggtcgattcctgtccgaggtac  
1-19tRNA-Ala(tgc)[88879,88951]  
gggcggttagtgtaatggtagcacgagtgttgcacgcattaagcagg  
ggttcgaatccctactgtccac  
1-20tRNA-Lys(ctt)[89112,89187]  
ggttcggtcgacaggctggtagtgcaggactctaatccttgagaac  
gtgggttcaaattcccacccaatcac  
1-21tRNA-Asn(gtt)[90044,90120]  
tccggtggggctactattggcagtagcgacgagctgttaactcgtttcc  
ttaggttcgattcctgcctccggagc  
1-22tRNA-Asn(gtt)[90875,90948]  
tgacctatagttcaattggcagagcagatggtgttaccatcaagtgc

aggttcgagtcctgctaggtcagc  
1-23tRNA-Arg(cct)[91646,91718]  
gtccctatagttcaagggaagaacaagactctcctaaagtctagatgca  
ggttcgaatcctgctggggatac  
1-24tRNA-Ile(gat)[91967,92042]  
gggagcgtagctcagtcctggcggagcaatgcactgataatgcatcggtc  
gctggttcaaattccagccgttcctac  
1-25tRNA-Ala(ggc)[92115,92188]  
ggggtcgtagcataactggtaatgcacttgatggcatacaagcgattgt  
gggttcaaattcccatcgactccac  
1-26tRNA-Lys(ctt)[92385,92458]  
gctccggtagctcagttggcagagcaggggactcttaatcctcgtgcgc  
tggttcaagtccagttcggagtac  
1-27tRNA-Lys(ttt)[92582,92658]  
ggtccagtcgcacagtcctggcagtgcaattgacttttaattttgaggac  
gtgggttcgaatcccactggaccacc  
1-28tRNA-Arg(tcg)[92661,92734]  
gcccttttagctcataggatagagcgatggcttcgaagccatgcgtagg  
gagttcgattctctcaaggggcgc  
1-29tRNA-Met(cat)[94028,94099]  
ggcagtagggcgctcgggtgtgccaacgactctcataaggtcgaggggctg  
gttcgaatccagctattgctac  
1-30tRNA-Met(cat)[94100,94171]  
ttgcaggttagtgaaacggtatcacgtagggctcataatcctaaattcct  
gttcgactcagggcctgcccc  
1-31tRNA-Tyr(gta)[94805,94887]  
gtgtgagcggcgaagttggagagacgcgacggctgtaaaaccgttcctt  
cgggtgagtcagttcgaatctgacctcacgcac  
1-32tRNA-Phe(gaa)[95178,95250]  
gggcatgtagctcagttggtagagcttcgggtgaagtaccgagtcgag  
ggttcgattccctactgcccac  
1-33tRNA-Cys(gca)[95841,95916]  
ggggtagatgtagcgggtgctgccgacagtctgcaaaactgttcgtatat  
tggagttcgactctcctctatccctc  
1-34tRNA-Thr(tgt)[95932,96007]  
gccaccttagctcatttggtgtagagcgacgctctttaaagcgtaggcg  
gtcgggtcgaaccgacaggtggctc  
1-35tRNA-Thr(ggt)[96100,96171]  
gccccatagtgctagtggaacacatatccttggtacggatatatcgtc  
agttcgattctgactgggggat  
1-36tRNA-Arg(acg)[96302,96375]  
ctctccataggctaattggataaaccagagtgtacgaacgctcaattgt  
gggttcgagtcgccgtggagagac  
1-38tRNA-Ala(ggc)[99723,99797]

tgtcacgtaattcaatgggaagaatcaatgcccttggccagggtaggtta  
gagggtcagtcctctcgtgacagc  
1-39tRNA-Leu(gag)[104794,104876]  
gcgcctatggtggaatggcagacacactagactgagactctaggccctga  
tggcgctccgggttcaactcccgtggcgctac  
1-40tRNA-Val(gac)[105314,105385]  
acccgcttagctcaatggtagagcacttgctcgacacgcaagttacgtga  
gttcaattctctcagtggtac  
1-41tRNA-Leu(caa)[105820,105896]  
ggccttagtcagaatcaggtatatgcggcggtctcaaaccgcgtcaa  
tgtgggtcagtcctcagggctac  
1-42tRNA-Ser(gct)[106130,106213]  
ggaaggtgagcgagaggtctcgaggtattgctaaactgctggattgt  
aaaaggtcggggttcgaatcctcctcctccgc  
1-43tRNA-Gln(ttg)[115857,115937]  
tcccagttgctctgttggtagggcgccctgactttgaatcaggacta  
gcgacgtaggttcgaatcctgcctggggagc

>MF358542.1 Streptomyces phage Sushi23, complete genome

1-1tRNA-Thr(cgt)c[16909,16981]  
gccccattagtgttaacggaacatactccttcgtaacgaagtgtcctc  
ggttcgactccgagatggggctc  
1-2tRNA-Gly(tcc)[72227,72298]  
gcatcggtagttaatggtagaacgtctgacttccaatcagacagcgcg  
gttcgattcccgtcgtgctc  
1-3tRNA-Gln(ctg)[72416,72488]  
tccccttgggtgaaccggcaacacagcagactctgaatctgtattcct  
agttcgaatctaggtggggagc  
1-4tRNA-Trp(cca)[72696,72767]  
atgtccttcgtataatggtagtacaagagattccaaacctcttagcgtgg  
gttcgattcctacaggacatgc  
1-5tRNA-Pro(tgg)[73642,73714]  
caggtgcggggaagatggtaatccgttggtttggaaacctaaagacccc  
ggttcgattccggggcacctgac  
1-6tRNA-Pro(tgg)[73718,73793]  
cgggatatagctcagcttggtcagagcgctgcatttgggatgcagaagtc  
gctggttcgaatccagttatcccgc  
1-7tRNA-Ile(tat)[76791,76865]  
gcgccagtagcataacggttcaatgcagtaggcttatctaccgagag  
aaggttcaattcctcctggcgctac  
1-8tRNA-Ser(gga)[77383,77468]  
ggaaagtaagcgattggctagcaggtatcttggaaacgtactaagggtgt  
tacagcccggctgggttcgattcccaggctttccgc  
1-9tRNA-Ser(tga)[77709,77795]  
ggaggcacgcattggagtgcttataggtcttgaaaacctgaaggtgtag

tgatatgccgtgggggttcgactccctctgtctccgc  
1-10tRNA-Asp(gtc)[80900,80976]  
gcgtctgtagtatagctcgtctaatacacctgattgtcaatcaggaaat  
cgcggttcgaatcccgtaggcgcgc  
1-11tRNA-Asp(gtc)[81340,81411]  
cccggcgtgggtgaatggaaacacacttcgtgtcagcgaaatgtcagg  
gttcgattcccttcgtcgggac  
1-12tRNA-Glu(ctc)[86244,86315]  
gccctatagctaaaggtaggatacaagattctcaatctgtggtcgga  
gttcaattctccgtaggggtac  
1-13tRNA-Glu(ttc)[86572,86646]  
gccccgttggtctagcggtaggataccgactttcaatccgtgtgaacg  
tcggttcgaatccgacacgggtac  
1-14tRNA-Val(tac)[86658,86729]  
gccccgttagctcaatgggagagcggcgcgtttacaccgcgtatacgggg  
gttcgattccctcactgggtac  
1-15tRNA-Leu(tag)[86883,86958]  
gcgccgttgacgggaactggcalacctagttgacttagaatcaactgctt  
gggagttcgactctccacggcgtag  
1-16tRNA-Leu(tag)[87097,87171]  
gcgtcggtagcccaatggcaggaggcaccagtcttaggaactggacagtg  
tgagttcgagtctcaccggcgtag  
1-17tRNA-Gly(gcc)[87494,87565]  
tccgtagtggtgaaatggtatcacatggccttgccaaggctaagcgcga  
gttcgattctcgtctacgggac  
1-18tRNA-Arg(tct)[87672,87745]  
gccctggtagcgtagtgataacgcggctgtcttctaaacagttacaggc  
aggttcgattcctgtccagggtac  
1-19tRNA-Ala(tgc)[88365,88437]  
gggcgattagtgtaatggtagcacgtctgtttgcaagcagatagagg  
ggttcgagtcctccattgtccac  
1-20tRNA-Lys(ctt)[88603,88677]  
gattcagtcgcagaattggtactgaaaagactcttaactcttgaggatg  
tgggttcgagtcacacgtgaatcac  
1-21tRNA-Asn(gtt)[89535,89611]  
tccggtggggctactattggcagtagcgacgagctgttaactcgtttccc  
tgtaggttcgattcctgcctccggagc  
1-22tRNA-Asn(gtt)[90363,90435]  
tggcctatagcttaacggcagagcgattgactgttaatcaattaggtgct  
ggttcgaatccagctaggtcagc  
1-23tRNA-Arg(cct)[92094,92166]  
gtccctatagttcaagggaagaacaagactctcctaaagtctagatgca  
ggttcgagtcctgctggggatc  
1-24tRNA-Ile(gat)[92411,92486]



gggagcgtagctcagctcgtcggtcggagcaatgcactgataatgcatcggtc  
gatggttcaaaccagccgttcctac  
1-25tRNA-Ala(ggc)[92490,92562]  
gggggttagcataacggtaatgcacttgcattggcatgcaagcgattgtg  
ggtcaaaccatcgactccac  
1-26tRNA-Lys(ctt)[92781,92854]  
gctccggtagctcagttggtagagcaggtgactcttaatcatcaggtcca  
cagttcaagtctgtcggagtac  
1-27tRNA-Lys(ttt)[92973,93048]  
gtccagtcgcacagctcgttagtgcaattgacttttaatcttttggac  
gtgggttcgaatccacctggaccac  
1-28tRNA-Arg(tcg)[93052,93125]  
gcccttttagctcattggatagagcgttggcttcgaagccaagcgtagg  
gagttcgattctctcaagggcg  
1-29tRNA-Met(cat)[94383,94455]  
ggcagtggtgaaacggctatcacgttccctcataagggaatacgaa  
ggttcgattcctccattgctac  
1-30tRNA-Met(cat)[94456,94527]  
ttgcagattagtgaaacggtatcacgctgggctcataatccagaattcct  
gttcgaatcagggctctgcccc  
1-31tRNA-Tyr(gta)[95156,95238]  
gcatgagcggcgaagttggagaggcgcggtggtctgtaaaaccattcctt  
cgggtgagtcagttcgaatctgacctcatgcac  
1-32tRNA-His(gtg)[95368,95440]  
gtgacgttgttgaatggtagcatagaagattgactcttcagaggcg  
ggttcgattccccacgtcacac  
1-33tRNA-Phe(gaa)[95508,95580]  
gggcatgtagctcagttggtagagcgtcggtgtgaagtaccgagtcgag  
ggttcgattccctacttggccac  
1-34tRNA-Cys(gca)[96164,96238]  
gaggtagaagcagcgggtgctgccgacagctgcaaaactgtttgtatt  
ggagttcaactctcctctatctctc  
1-35tRNA-Thr(tgt)[96472,96543]  
gcctcattcgcttaatggtaaagccctactctgtaaagtagtccgtca  
gttcgattctgacatgaggctc  
1-36tRNA-Thr(ggt)[97147,97220]  
gcctcgttagtctaatggtaaacacatccttggtagcgatataaaga  
gagttcgattctctcacaggctc  
1-37tRNA-Arg(acg)[97389,97462]  
ctctccataggctaattggataaaccagagtgtctacgaacgctcaattgt  
gggttcgagtcgccgctggagagac  
1-39tRNA-Ala(ggc)[100659,100734]  
tgtcacgtaattcaatcaggcagaatcaatgcccttgccagggtaggtt  
agaggttcaaatcctctcgtgacagc

1-40tRNA-Leu(gag)[105401,105483]  
 gcgcctatggtggaatggtagacacactagactgagactctaggctcgaa  
 tgagcgtccgggttcgactcccgggtggcggtac  
 1-41tRNA-Val(gac)[105920,105991]  
 acccgcttagctcaatggtagagcgctgctcgacacgcaggagacatga  
 gttcaattctcttagtgggtac  
 1-42tRNA-Leu(caa)[106416,106492]  
 ggctctgtagcagaatcaggtatatgcgcgggtctcaaaccgggtcaa  
 tgtgggttcgagtcctcagggctac  
 1-43tRNA-Ser(gct)[106726,106809]  
 ggaaggtgagcgagaggtctcgagtagttgctaaactgctgggtgt  
 aaaaggctcgggttcgaatcctcctcctccgc  
 1-44tRNA-Gln(ttg)[117198,117278]  
 tccccagttgctctgttggtagggccgctgactttgaatcaggacta  
 gcgacgtaggttcgaatcctgcctggggagc  
 >MF373840.1 Mycobacterium phage Fred313, complete genome  
 1-1tRNA-Asn(gtt)[3421,3494]  
 tgatctgtagctcaaccggcagagcaccggctgtaaccgggcccgttg  
 aggttcgagtcctccagatcagc  
 1-2tRNA-Trp(cca)[3530,3603]  
 aggcgcgtagctcaattggtagagcagcggctccaaagccgctgctgc  
 aggttcgagtcctgccgcgtctgc  
 >MF373842.1 Rhodococcus phage Jester, complete genome  
 1-1tRNA-Asn(gtt)[1503,1576]  
 tcacgtatagctcaatcggcagagcaacgcactgtaaggcgggggtga  
 aggttcgagtcctctacgtgagc  
 1-3tRNA-Trp(cca)[1702,1776]  
 gggcacgtagctcaattggatagagccccgggtctccaaagccggtggtg  
 ggggttcgagtcctccgggcctgc  
 >MF324915.1 Mycobacterium phage Amgine, complete genome  
 1-1tRNA-Gln(ctg)[34683,34774]  
 tcggcgctagtggcgtgcgagcagccctcgccgctctggcgctcgtcga  
 ggggccttacgcgctgccggtgcgattccagcgtgctggccc  
 >MF324913.1 Mycobacterium phage Cain, complete genome  
 1-1tRNA-Trp(cca)[889,963]  
 ggggtgttagctcaaccggtagagcagcgggtctccaaagccgcccgttg  
 caggttcgattcctgccgcgcccgc  
 1-2tRNA-Lys(ttt)[31432,31505]  
 gccctgtagctcagttggtagagcaggagacttttaatcttcgggtcca  
 aggttcgatcccttcgggggcac  
 >MF324910.1 Mycobacterium phage GuuelaD, complete genome  
 1-1tRNA-Thr(cgt)[62780,62851]  
 gctggattagcttagtggtcaagcgtgccttcgtaacgcagattaccg  
 gttcgattccggtatccagctc

1-2tRNA-Pro(tgg)[63080,63154]  
ctggctgtagctcaatttggtagagcgctggcttgggtgccaggggttg  
caggttcaaactctgtagccagac

1-3tRNA-Trp(cca)[63275,63350]  
agctcggtagctcaatttggtagagcagcggtctccaaagccgcggttcc  
ccgttcgagtcggggccgggttgcca

1-4tRNA-Leu(tag)[64035,64109]  
ggccctctagcccaattggcagaggcacaggttttaggtacctgtcagt  
cgagttcgagtctcgggggccac

1-5tRNA-His(gtg)[64110,64179]  
gcttagtagcctagtggttaaggcagccggttgatccggtgaacctgag  
ttcgattctcagctaaagcc

1-6tRNA-Gln(ctg)[64184,64258]  
tgaccgtagcacaactggtagttgcgccgcgctctggacgagggttg  
ttggttcgatcccagctcggtcagc

1-7tRNA-Gly(tcc)[64307,64381]  
gtgctagtaaccatgttggtgggtacctgactccactcaggatttcg  
cgggttcgattcctgtctagcacac

1-8tRNA-Lys(ctt)[64424,64501]  
tgccctgtagctcagttggtagagctccgactcttaatcggtaggtca  
caggttcaagtcctgtacgggtaccca

1-9tRNA-Cys(gca)[65683,65754]  
gccgttgtgtccgagtggttaggtgccaggctgcaaacttggttagtcgc  
gttcgattcgcggggacggctc

1-10tRNA-Asn(gtt)[66162,66235]  
tcctccgtagctcaattggcagagcgcgactgtaatcgctggttgg  
tggttcgagtcacccgttgagc

1-11tRNA-Lys(ttt)[66429,66503]  
gccctatagctcagttggtagagcaggagacttttaatttcgggtcct  
aggttcgatccctagtgggggcacc

>MF324914.1 Mycobacterium phage Krueger, complete genome  
1-1tRNA-Lys(ttt)[32445,32518]  
gcccctgtagctcagtcggtagagcaggagacttttaatttcgggtcca  
aggttcgatcccttcgggggcac

>MF324899.1 Mycobacterium phage Lokk, complete genome  
1-1tRNA-Gln(ctg)[6114,6195]  
gccctgttcgtttaatcggcaggactcccgtctggacgcagagacaacg  
ggcaatggaggttcgactcctctacggggcac

>MF324909.1 Mycobacterium phage PhelpsODU, complete genome  
1-1tRNA-Trp(cca)[893,967]  
gggtgtgtagctcaaccggtagagcagcggtctccaaagccgcggtta  
caggttcgattcctgtcgcggccgc

1-2tRNA-Lys(ttt)[31464,31537]  
gcctccgtagctcaattggcagagcagctgacttttaatcagcggtcgc

aggttcgatccctgccggggcac  
 >MF324912.1 Mycobacterium phage Phrank, complete genome  
 1–1tRNA–Trp(cca)[895,969]  
 ggggtgttagctcaaccggtagagcagcggtctccaaagccgccggttg  
 caggttcgattcctgccgcgccgc  
 1–2tRNA–Lys(ttt)c[31421,31494]  
 gccctgtagctcagttggtagagcaggagacttttaatcttcgggtcca  
 aggttcgatccctgccggggcac  
 >MF324911.1 Mycobacterium phage SirPhilip, complete genome  
 1–1tRNA–Trp(cca)[784,857]  
 ggggtgttagctcaattggtagagcagcggtctccaaagccgccggttg  
 aggttcgagtcctgccgcgctcgc  
 >MF324908.1 Mycobacterium phage Unicorn, complete genome  
 1–1tRNA–Trp(cca)[893,967]  
 ggggtgttagctcaaccggtagagcagcggtctccaaagccgccggtta  
 caggttcgattcctgtcgccgccgc  
 1–2tRNA–Lys(ttt)c[31464,31537]  
 gcctccgtagctcaattggcagagcagctgacttttaatcagcggtcgc  
 aggttcgatccctgccggggcac  
 >MF324905.1 Rhodococcus phage Alatin, complete genome  
 1–1tRNA–Asn(gtt)[1503,1576]  
 tcacgtatagctcaatcggcagagcaacgcactgtaaggcgggggttg  
 aggttcgagtccttctacgtgagc  
 1–3tRNA–Trp(cca)[1702,1776]  
 gggcacgtagctcaattggatagagccccggtctccaaagccggtggttg  
 ggggttcgagtcctccgggcctgc  
 >MF324903.1 Rhodococcus phage AppleCloud, complete genome  
 1–2tRNA–Trp(cca)[1409,1483]  
 gggcacgtagctcaattggatagagccccggtctccaaagccggtggttg  
 ggggttcgagtcctccgggcctgc  
 >MF324898.1 Rhodococcus phage Hiro, complete genome  
 1–1tRNA–Asn(gtt)[1503,1576]  
 tcacgtatagctcaatcggcagagcaacgcactgtaaggcgggggttg  
 aggttcgagtccttctacgtgagc  
 1–3tRNA–Trp(cca)[1702,1776]  
 gggcacgtagctcaattggatagagccccggtctccaaagccggtggttg  
 ggggttcgagtcctccgggcctgc  
 >MF324902.1 Rhodococcus phage Krishelle, complete genome  
 1–1tRNA–Asn(gtt)[1503,1576]  
 tcacgtatagctcaatcggcagagcaacgcactgtaaggcgggggttg  
 aggttcgagtccttctacgtgagc  
 1–3tRNA–Trp(cca)[1702,1776]  
 gggcacgtagctcaattggatagagccccggtctccaaagccggtggttg  
 ggggttcgagtcctccgggcctgc

>MF324901.1 Rhodococcus phage Naiad, complete genome

1-tRNA-Asn(gtt)[1503,1576]

tcacgtatagctcaatcggcagagcaacgcactgttaaggcgggggttga

aggttcgagtccttctacgtgagc

1-3tRNA-Trp(cca)[1702,1776]

gggcacgtagctcaattggatagagccccggctcctccaaagccggtggttg

ggggttcgagtcctccgggcctgc

>MF324904.1 Rhodococcus phage RexFury, complete genome

1-tRNA-Asn(gtt)[1534,1607]

tcacgtatagctcaatcggcagagcaacgcactgttaaggcgggggttga

aggttcgagtccttctacgtgagc

1-3tRNA-Trp(cca)[1733,1807]

gggcacgtagctcaattggatagagccccggctcctccaaagccggtggttg

ggggttcgagtcctccgggcctgc

>MF324900.1 Rhodococcus phage StCroix, complete genome

1-tRNA-Asn(gtt)[1503,1576]

tcacgtatagctcaatcggcagagcaacgcactgttaaggcgggggttga

aggttcgagtccttctacgtgagc

1-3tRNA-Trp(cca)[1702,1776]

gggcacgtagctcaattggatagagccccggctcctccaaagccggtggttg

ggggttcgagtcctccgggcctgc

>MF185717.1 Mycobacterium phage AlleyCat, complete genome

1-tRNA-Trp(cca)[847,920]

atcgggtagctcaattggtagagcagcggctcctccaaaccgccggttgc

aggttcgagtcctgccccgtgtgc

>MF185726.1 Mycobacterium phage Appletree2, complete genome

1-tRNA-Leu(caa)[60774,60848]

ggtcctgtaggcaaattggcaaagccgctcactcaaaatgacgtgtctg

tgggttcgagtcaccacgggactac

1-2tRNA-Thr(cgt)[60849,60923]

gctgccttagctcagatggctagagcgcgctctcgtaaagcggaggtcg

cgggttcgaggcccgaggcagctc

1-3tRNA-Lys(ctt)[61210,61283]

gcctcgtagctcagttggttagagctgccgactcttaatcggtaggtcgc

aggttcaagtcctgcacggggtac

1-4tRNA-Tyr(gta)[61294,61377]

gcgtcggaggtacctgttggttggtacacctgcctgtaaagcaggcgt

tcggcttcgggggttcgattccctccggcgtac

1-5tRNA-Trp(cca)[61387,61462]

agctcggtagctcaattggtagagcaacggtccccaagctgtgggttcc

ccgttcgagtcggggccgggttgcca

1-6tRNA-Leu(tag)[62011,62085]

ggcccgctaggcgaattggcatagccgcagatttaggttctggtgttc

cgagttcgattctgggcgggccac

1-7tRNA-Cys(gca)[63311,63384]  
gccgctgtggccgagtggttaggcaccggcctgcaaagccggttagtcg  
gttcgattccggaggcggtcca

1-8tRNA-Lys(ttt)c[63665,63739]  
gccctatagctcagttggtagagctatcgcttttaagcgacaggtcgc  
aggttcgagtcctgctgggggcacc

>MF185727.1 Mycobacterium phage BobSwaget, complete genome  
1-tRNA-Gln(ctg)[6109,6190]  
gcctgttcgtttaatcggcaggactcccgtctggacgcagagacaacg  
ggcaatggaggttcgactcctctacggggcac

>MF185719.1 Mycobacterium phage Edugator, complete genome  
1-tRNA-Trp(cca)[847,920]  
atcgggtagctcaattggtagagcagcggtctccaaaaccgcggttc  
aggttcgagtcctgccccgtgtgc

>MF185720.1 Mycobacterium phage Guillsminger, complete genome  
1-tRNA-Trp(cca)[822,897]  
tcgcaggtagctcaattggtagagcagcggtctccaaaaccgcggttc  
aggttcgagtcctgctctgcgggcca

>MF185729.1 Mycobacterium phage KADY, complete genome  
1-tRNA-Asn(gtt)[3922,3997]  
tgatctgtagctcaatcggcagagcaccggctgttaaccgggacgttg  
aggttcgagtcctcccagatcagcca

1-2tRNA-Trp(cca)[4038,4112]  
aggcacgtagctcaattggtcagagcagcggtctccaaagccgcccgtg  
caggttcgagtcctgccgtgtctgc

1-3tRNA-Leu(cag)[4147,4221]  
ggctcggtaggcaaacaggcaaagccgctgtctcaggaacaggtgcgtg  
agggttcgactccctcccgagctac

>MF185730.1 Mycobacterium phage Miley16, complete genome  
1-tRNA-Thr(cgt)[63338,63411]  
gccaccttagctcagttggtagagcagccccttcgtaacgggcaggtcag  
cgggtcgattccgctaggtggctc

1-2tRNA-Pro(tgg)[63639,63713]  
ctggctgtagctcaactggtagagcgtggcttgggtgccaggggttg  
caggttcaaatcctgtagccagac

1-3tRNA-Trp(cca)[63834,63907]  
agctcggtagctcaattggtagagcagcggtctccaaagccgcccgttc  
ccgttcgagtcggggtcgggttc

1-4tRNA-Tyr(gta)[64018,64100]  
gtggtggttgggcttgttggttgcccacctgactgtaaatcaggcggtt  
cggcaccgggggttcgattccctcccaccacac

1-5tRNA-Leu(tag)[64514,64588]  
ggccctctagcccaattggcagaggcacaggttttaggtacctgtcagtg  
cgagttcgagtcctcgggggccac

1-6tRNA-His(gtg)[64589,64658]  
gcttagtagcctagtggttaaggcagccggttgatccggtgaacctgag  
ttcgattctcagctaaagcc  
1-7tRNA-Gln(ctg)[64663,64737]  
tgaccggtagcacaaactggtagttgcgccgcgtctggacgagggttg  
ttggttcgatcccagctcggtcagc  
1-8tRNA-Gly(tcc)[64853,64927]  
gtgctagtaacctatgttgctgggtgcctgactccactcaggattcg  
cgggttcgattcctgtctagcacac  
1-9tRNA-Lys(ctt)[64970,65047]  
tgccctgtagctcagttggtagagctgccgactcttaacggtaggtca  
caggttcaagtctgtacgggtaccca  
1-10tRNA-Cys(gca)[66237,66310]  
gccgtcatggctgagtggttaggcgtcggactgcaaatccggcttatccc  
agttcgattctgggtggcggtcc  
1-11tRNA-Asn(gtt)[66672,66745]  
tcctccgtagctcaattggcagagcgcgcgactgttaacgcgtggttg  
tggttcgagtcacccgttgagc  
1-12tRNA-Lys(ttt)c[66939,67013]  
gcccctatagctcagttggtagagcaggagacttttaatctcgggtcct  
aggttcgatccctagtgggggcacc

>MF185722.1 Mycobacterium phage Peanam, complete genome

1-tRNA-Trp(cca)[1038,1111]  
gggtgtgtagctcaattggcagagcagcggctctcaaagccgccggtgc  
acgttcgatccgtgccgcgccgc

>MF185732.1 Mycobacterium phage Stagni, complete genome

1-tRNA-Asn(gtt)[3842,3917]  
tgatctgtagctcaatcggcagagcacccggctgttaaccgggacgttg  
aggttcgagtcctcccagatcagcca  
1-2tRNA-Trp(cca)[3958,4032]  
aggcacgtagctcaattggtcagagcagcggctctcaaagccgcccgtg  
caggttcgagtcctgccgtgtctgc  
1-3tRNA-Leu(cag)[4067,4141]  
ggctcggtaggcaaacaggcaaagccgcctgtctcaggaacaggtgcgtg  
agggttcgactccctcccagctac

>MF185733.1 Mycobacterium phage StepMih, complete genome

1-tRNA-Asn(gtt)[3833,3908]  
tgatctgtagctcaatcggcagagcacccggctgttaaccgggacgttg  
aggttcgagtcctcccagatcagcca  
1-2tRNA-Trp(cca)[3949,4023]  
aggcacgtagctcaattggtcagagcagcggctctcaaagccgcccgtg  
caggttcgagtcctgccgtgtctgc  
1-3tRNA-Leu(cag)[4058,4132]  
ggctcggtaggcaaacaggcaaagccgcctgtctcaggaacaggtgcgtg

agggttcgactccctcccgagctac

>MF140398.1 Mycobacterium phage Amohnition, complete genome  
 1-tRNA-Trp(cca)[812,887]  
 ggggtcctagctcaattggtagagcagcggtctccaaagccgcggttgc  
 aggttcgactcctgcggagcccgcca

>MF140402.1 Mycobacterium phage Chancellor, complete genome  
 1-tRNA-Arg(gcg)[14207,14300]  
 tcggcggcgctgcgcaggagatgggcagcagcgttcgcgccacctgtcg  
 aacctcaaggcggcctattcgcggttcggtgccgagctgtcggg  
 1-2tRNA-Lys(ttt)c[30855,30930]  
 gccccgtagctcaatcggaagagcagccggctttaaccggcgggtacg  
 gagatcgaaactccggcggggcacca

>MF140403.1 Mycobacterium phage Changeling, complete genome  
 1-tRNA-Trp(cca)[6187,6260]  
 gggcacgtagctcaatcggtagagcagcggtctccaaagccgaggttcc  
 aggttcgaaccctggcgggctcgc

>MF140405.1 Mycobacterium phage Clautastrophe, complete genome  
 1-tRNA-Tyr(gta)[39564,39647]  
 gtggcgaaggcaactgttggtttgtgcacctgcctgtaaagcagcgct  
 tcggcttcgggggttcaattccctctgccacac  
 1-2tRNA-Thr(cgt)[62792,62864]  
 gccaccttagctcagcggtagagcagccctcgtaacgcgcaggtcaac  
 ggttcgattccgttaggtggctc  
 1-3tRNA-Pro(tgg)[63217,63289]  
 cggaacaggtgtaatggtgcatgaggcggttgatcgccggggttcgg  
 ggttcgactccctggttccgac  
 1-4tRNA-Trp(cca)[63633,63706]  
 agctcggtagctcaactggttagagcagtggtctccaaagccaccggttgc  
 aggttcgactcctgtccgggttc  
 1-5tRNA-Leu(tag)[63707,63781]  
 ggttcgtaggcaactggcaagccgtctgacttagaatcaggtgtttg  
 ggagttcgactctccccggaactac  
 1-6tRNA-His(gtg)[63782,63851]  
 gctaagtagcttaatggtaaagccccggttggtccgggcgatcacgg  
 ttcaactccgtgcttaagcc  
 1-7tRNA-Gln(ctg)[64131,64205]  
 tgcccgctagcacaattggcagttgcgctcgctctgaacgcagaggttc  
 caggttcgactcctgggtgggcagc  
 1-8tRNA-Lys(ctt)[64215,64288]  
 gcgtcgttagctcagttggttagagcagggcactctaatgctcgggtcgg  
 gggttcaagtcctcacggcgac  
 1-9tRNA-Pyl(cta)[65432,65524]  
 tgctcaaatgggtagggcgttcccctgtcatctaaaggcaggtgcctc  
 gctgttaacgaggtcacgcaggttcgacccctgctgggggagc



1-10tRNA-Lys(ttt)c[65529,65602]  
gccgcgctagctcagttggtagagcagctgacttttaacagcgggtccg  
gggttcgatccccggcgcggtac

>MF140406.1 Mycobacterium phage DARTH, complete genome  
1-1tRNA-Trp(cca)[812,887]  
gggttcctagctcaattggtagagcagcgggtctccaaagccggttcg  
aggttcgactcctgcggagcccgcga

>MF140408.1 Mycobacterium phage DismalFunk, complete genome  
1-1tRNA-Arg(gcg)[665,757]  
caccgcttagcgaggttcgcgccacgtcattgcgccgacggcatcgtg  
tcgacggcctggcgtcggtgtgtgcgacgtgcgcggcgatgg

>MF140410.1 Mycobacterium phage Et2Brutus, complete genome  
1-1tRNA-Trp(cca)[6118,6193]  
gcgttcctagctcaattggtagagcagcgggtctccaaagccggttc  
aggttcgagccctggggaacgtgcca

>MF140412.1 Mycobacterium phage Jeckyll, complete genome  
1-1tRNA-Trp(cca)[1053,1126]  
gggtgtgtagctcaatcggtagagcagcgggtctccaaagccggttcg  
acgttcgagtcgtgccgcggcgc

>MF140413.1 Mycobacterium phage Kingsolomon, complete genome  
1-1tRNA-Tyr(gta)[39564,39647]  
gtggcgaaggcaactgttggtttgtgcacctgcctgtaaagcaggcgt  
tcggcttcgggggttcaattccctctgccacac

1-2tRNA-Thr(cgt)[62901,62973]  
gccaccttagctcagcggtagagcagccttcgtaacgcgcaggtcaac  
ggttcgattccgttagtggtc

1-3tRNA-Pro(tgg)[63324,63396]  
cggaaacaggtgtaatggtgcatgaggcgttggatcgccggggttcgg  
ggttcgactccctggttccgac

1-4tRNA-Trp(cca)[63739,63812]  
agctcggtagctcaactggtagagcagtggtctccaaagccacggttc  
aggttcaagtcctgtccgggttc

1-5tRNA-Leu(tag)[63813,63887]  
ggttcgtaggcaactggcaagcgtctgacttagaatcaggtgttg  
ggagttcgactctccccggaactac

1-6tRNA-His(gtg)[63888,63957]  
gctaagtagcttaattggtaaagccccggtgtggtccggcgatcacgg  
ttcaactccgtgcttaagcc

1-7tRNA-Gln(ctg)[64237,64311]  
tgcccgtagcacaattggcagttgcgtcgcgtctgaacgcagaggttc  
caggttcgactcctgggtgggcagc

1-8tRNA-Lys(ctt)[64321,64394]  
gcgtcggttagctcagttggtagagcaggcactcttaatgctcgggtcgg  
gggttcaagtcctcacggcgac

1-9tRNA-Pyl(cta)[65537,65629]  
tgctcaaatggtagggccgttcccctgtcatctaaaggcaggatgcctc  
gctgttaacgaggtcacgcaggttcgacccctgctgggggagc  
1-10tRNA-Lys(ttt)c[65634,65707]  
gccgcgctagctcagttggtagagcagctgacttttaacagcgggtccg  
gggttcgatccccggcgcgttac

>MF140414.1 Mycobacterium phage Krypton555, complete genome

1-1tRNA-Tyr(gta)[39801,39884]  
gtggcgaaggtaactgctggtttgttacacctgctaaagcaggcgt  
tcggcttcgggggttaattccctctcgcacac  
1-2tRNA-Thr(cgt)[63180,63252]  
gccaccttagctcaggggtagagcagcgccttcgtaacgcgcaggtcaac  
ggttcgattccgttaggtggctc  
1-3tRNA-Pro(tgg)[63599,63673]  
ctggtttagcgcagcttggtagcgcgcctgattggattcagggggtcg  
gaggttcaaatccttcagccagac  
1-4tRNA-Gly(tcc)[64014,64088]  
gcgctagctacccctgttggcggggtgcctgcctccaagcaggatcacg  
cgggttcgattcctgtctagtctc  
1-5tRNA-Trp(cca)[64144,64217]  
agctcggtagctcaactggtagagcagtggtctccaaagccaccggttgc  
aggttcgactcctgtccgggttc  
1-6tRNA-Leu(tag)[64218,64292]  
ggttcgtaggcaaactggcaaagccgtctgacttagaatcaggtgtttg  
ggagttcgactctccccggaactac  
1-7tRNA-His(gtg)[64293,64362]  
gctaagtagcttaatggtaaagccccggttggtccgggcgatcacgg  
ttcaactccgtgcttaagcc  
1-8tRNA-Gln(ctg)[64644,64719]  
tgcccgtagcacaatttggcagttgcgcccggtctgaaccgggaggtt  
ccaggttcgactcctgggtgggcagc  
1-9tRNA-Lys(ctt)[64731,64804]  
gcgtcgtagctcagttggtagagcagccgactcttaacggcgggtcgg  
gggttcaagtccctcacggcgac  
1-10tRNA-Asn(gtt)[65933,66005]  
tcccctgtcatttaaccggcaggatgcctcgctgttaacaggtcgtgca  
ggttcgatccctgctgggggagc  
1-11tRNA-Lys(ttt)c[66010,66083]  
gccgcgctagctcagttggtagagcagctgacttttaacagcgggtccg  
gggttcgatccccggcgcgttac

>MF140416.1 Mycobacterium phage LastHope, complete genome

1-1tRNA-Trp(cca)[1015,1088]  
gggtgtgtagctcaatcggtagagcagcgggtctccaaagccgccggttgc  
acgttcgagtcgtgccgcgccgc

>MF140421.1 Mycobacterium phage Nicholas, complete genome

1-1tRNA-Tyr(gta)[39564,39647]  
gtggcgaaggcaactgttggtttgtgcacctgcctgtaaagcaggcgct  
tcggcttcgggggttcaattccctctcgcacac  
1-2tRNA-Thr(cgt)[62901,62973]  
gccaccttagctcagcggtagagcagcgcttcgtaacgcgcaggtaac  
ggttcgattccgttagtggtc  
1-3tRNA-Pro(tgg)[63324,63396]  
cggaaacagggtgaatggtgcatgaggcgtttggatcgccggggtcgg  
ggttcgactccctggttccgac  
1-4tRNA-Trp(cca)[63739,63812]  
agctcggtagctcaactggtagagcagtggtctcaaagccaccggttc  
aggttcaagtcctgtccgggtgc  
1-5tRNA-Leu(tag)[63813,63887]  
ggttcgtaggcaaactggcaaagccgtctgacttagaatcaggtgttg  
ggagttcgactctccccggaactac  
1-6tRNA-His(gtg)[63888,63957]  
gctaagtagcttaattgtaaagccccggttggtccgggcgacacagg  
ttcaactccgtgcttaagcc  
1-7tRNA-Gln(ctg)[64237,64311]  
tgcccgctagcacaattggcagttgcgctcgtctgaacgcagaggttc  
caggttcgactcctgggtgggcagc  
1-8tRNA-Lys(ctt)[64321,64394]  
gcgtcgtagctcagttggtagagcaggcactcttaatgctcgggtcgg  
gggttcaagtcctcacggcgac  
1-9tRNA-Pyl(cta)[65537,65629]  
tgctcaaatgggtaggccgttcccctgtcatctaaaggcaggatgcctc  
gctgtaacgaggtcacgcaggttcgacccctgctgggggagc  
1-10tRNA-Lys(ttt)c[65634,65707]  
gccgcgctagctcagttggtagagcagctgacttttaalcagcgggtccg  
gggttcgatccccggcgcggtac

>MF140422.1 Mycobacterium phage Nicholasp3, complete genome

1-1tRNA-Thr(cgt)[62844,62917]  
gccaccttagctcagttggtagagcagccccttcgtaacgggcaggtcag  
cggttcgactccgctagtggtc  
1-2tRNA-Pro(tgg)[63139,63213]  
ctggctgtagctcaacttggtagagcgtggctttgggtgccaggggttg  
caggttcaaatcctgtagccagac  
1-3tRNA-Trp(cca)[63343,63416]  
agctcggtagctcaattggtagagcagcggtctcaaagccgcccgttcc  
ccgttcgagtcggggtcgggttc  
1-4tRNA-Tyr(gta)[63527,63609]  
gtggtggttgggcttgttggtggccacctgactgtaaatcaggcgtt  
cggcatcgggggttcgattccctcccaccacac

1-5tRNA-Leu(tag)[63846,63920]  
 ggccctctagcccaattggcagaggcacaggttttaggtacctgtcagtg  
 cgagttcgagtcctcgcgggggccac  
 1-6tRNA-His(gtg)[63921,63990]  
 gcttagtagcctagtggaaggcagccggttgatccggtgaacctgag  
 ttcgattctcagctaaagcc  
 1-7tRNA-Gln(ctg)[63995,64069]  
 tgaccggtagcacaactgtagttgcgccgcgtctggacgaggaggttg  
 ttggttcgatcccagctcggtcagc  
 1-8tRNA-Gly(tcc)[64185,64259]  
 gtgctagtaacctatgttgctgggtgcctgactccactcaggattcg  
 cgggttcgattcctgtctagcacac  
 1-9tRNA-Lys(ctt)[64302,64379]  
 tgccctcgtagctcagttgtagagctccgactcttaacggtaggtca  
 caggttcaagtcctgtacgggtacca  
 1-10tRNA-Cys(gca)[65561,65633]  
 gccgttgtccgagtggttaggtgccaggctgcaaacttggttagtcgc  
 gttcgattcgcggggacggctcc  
 1-11tRNA-Asn(gtt)[65902,65975]  
 tcctccgtagctcaattggcagagcgcgcgactgtaacgcgtgggttg  
 tgggtcgagtcacccgttgagc  
 1-12tRNA-Lys(ttt)c[66169,66243]  
 gccctatagctcagttgtagagcaggagacttttaatttcgggtcct  
 aggttcgatccctagtgggggcacc  
 >MF140428.1 Mycobacterium phage Slimphazie, complete genome  
 1-1tRNA-Trp(cca)[1003,1076]  
 ggggtgtgtagctcaatcggtagagcagcggtctccaaagcccggttgc  
 acgttcgagtcgtgccgcgccgc  
 >MF140430.1 Mycobacterium phage Tachez, complete genome  
 1-1tRNA-Trp(cca)[972,1045]  
 ggggtgtgtagctcaatcggtagagcagcggtctccaaagcccggttgc  
 acgttcgagtcgtgtcgcgccgc  
 >MF140435.1 Mycobacterium phage Wintermute, complete genome  
 1-1tRNA-Arg(gcg)[14196,14289]  
 tcggcgcgctgcgcaggagatgggcagcagcgttcggcaccctgtcg  
 aacctcaaggcggcctattcgcggttcggtgccgagctgtcggg  
 1-2tRNA-Lys(ttt)c[30842,30917]  
 gccccgtagctcaatcggaagagcagccggtttaaccggcgggtacg  
 gagatcgaaactccggcggggcacca  
 >MF402939.1 Escherichia phage OSYSP, complete genome  
 1-1tRNA-Met(cat)c[899,974]  
 agttagttggcagagcggttatgcacctcctcatacggagcgactacag  
 tggttcaatccactactaactacca  
 1-2tRNA-Ile(gat)c[981,1056]

gctctgatgtcaacaggttagaacaggcgaccgataatcgtaaactct  
tggttcgatcccaagtcggagtacca  
1-3tRNA-Thr(tgt)c[1426,1500]  
gctcctaaagcattgctggcgatgcagttgccttgtaagcatctgaaccg  
ggttcgattcctggaggagcacca  
1-4tRNA-Gly(tcc)c[1905,1979]  
gcgtgattagttcagtggttagaataactggctccaaccagtagacacg  
agttcgactctcgtatcccgcacca  
1-5tRNA-Gln(ttg)c[1986,2061]  
tggagagtagtgtaatggtagcacaacggccttgactccgttaatggt  
aggttcgattcctccttctccagcca  
1-6tRNA-Gln(ctg)c[2068,2143]  
tgggatgtagatcaattggcagatcgtcggccttgactccgaaggctcc  
acgttcgatccgtggcatcccagcca  
1-7tRNA-His(gtg)c[2377,2453]  
gtggctatatcataattggttaatgatcctgattgtgaatcaggcctatg  
tggattcgaattccactagccacccca  
1-8tRNA-Ser(tga)c[3020,3109]  
agaagataggacgtagtggtacgtaactggtcttgaaaaccagcccgtg  
tagtgatacggtagtggttcgactccattatctctgcca  
1-9tRNA-Leu(tag)c[3693,3769]  
gcgtgattgatggaattggcatacataccgtccttagaagtcgggtttg  
agggttcgaatccctgtcacgcacca  
1-10tRNA-Ala(tgc)c[3775,3853]  
gggggatgggtctgctaggggtggacacctcgcttgaccaggagacatca  
gaacgattcgaattcgttatcctccacca  
1-11tRNA-Val(tac)c[4493,4566]  
gctcgggttagtttaatgggagaaccccgctttacacggcggttgcgata  
gttcgattctatcaccgagtacca  
1-12tRNA-Lys(ttt)c[5035,5113]  
agatcgctagctcaataggtttagtagcatccgacttttaatcggaaggt  
tctgggttcgagtcacgagcgatctacca  
1-13tRNA-Met(cat)c[5303,5380]  
tgcgggttagatctctggtagagatcgtagtctcataagctagaaagag  
gtaggttcgattcctgcacccgcttcca  
1-14tRNA-Pro(tgg)c[5387,5464]  
ctccgtgtagctcagtttggccagagcgtttcgttggggcgatagggtc  
gggggttcaatcctcccacggagacca  
1-15tRNA-Asp(gtc)c[6806,6882]  
gcgaccggggctggcttggtaatggtactcccctgtcacgggagagaatg  
tgggttcgaatcccatcggtcgcgcca  
1-16tRNA-Asn(gtt)c[7180,7262]  
gggtcggttagccaagcggtttggcgggtgactgttaatccatgtcgaaag  
acaacgtaggttcgaatcctacacggcccgcga

1-17tRNA-Cys(gca)c[7270,7345]  
cgaccgttggctgaatggcttaggcgaaggattgcaaatccttttatgt  
gagttcaaatctcatgcggtcgtcca

1-18tRNA-Phe(gaa)c[8083,8157]  
gcaccttagctgagatggattagcgcttgcctgaagagcttgagaggtt  
cgttcaattcgaacagggtgcacca

1-19tRNA-Glu(ttc)c[8244,8318]  
gcacctatcgtctaattggctaggacatcaggatttcaatctgagaatcgg  
agtcaattctccgtgggtgtgcca

1-20tRNA-Tyr(gta)c[8327,8414]  
gggcgtttattccgtaagtggtagcggaggggattgtaaatccctgggtca  
ttgcgactcgagtgggtcgactccattaacgccacca

1-21tRNA-Leu(taa)c[9291,9367]  
gggggtgtaatcgaattggcataggtactggactaaaattcaggtttg  
tgggttcgaatcccaccaccctacca

1-22tRNA-Ser(gct)c[9958,10046]  
ggaagaatagcataacggattgcagcagattgctaactctgcggttga  
aatatagccttgtgggttcgattcccacttctccgcca

1-23tRNA-Arg(tct)c[13581,13652]  
cggggtgtagtctaaggagaggcaggagtcttctaaattcctttatgca  
ggttcgaatcctgtcacctcgg

1-24tRNA-Met(cat)c[109359,109434]  
agttagtggcagagtggttatgcacctccttcatacggagcgactacag  
tggttcaatccactactaactacca

1-25tRNA-Ile(gat)c[109531,109607]  
gcttcggtagcttagcgatctaaagcactcggctgataaccgagagatcg  
ggggtttaatccctcccggagtacca

1-26tRNA-Thr(tgt)c[110183,110257]  
gctcctaaagcattgctggcgatgcagttgccttgtaagcatctgaaccg  
ggttcgattcctggtgggagcacca

1-27tRNA-Gln(ttg)c[110776,110851]  
tggagagtagtgtaatggtagcacaacggccttgactccgttaatgt  
aggttcgattcctccttccagcca

>MF155946.1 Streptomyces phage Mildred21, complete genome

1-1tRNA-Thr(cgt)c[15486,15558]  
gccccgctagtgatattggtagcacacttctctgtaaagaagaagactc  
ggttcgattccgagggcgggctc

1-2tRNA-Gly(tcc)[71525,71597]  
gcatcgggtggtagtggaacacgctgcctccaagtcagaattgcgg  
gttcgattcccgcctcgggtcctc

1-3tRNA-Gln(ctg)[71730,71802]  
tccccttgggtgaaccggcaacacaacagactctgaatctgtagttcct  
agttcgaatctaggttggggagc

1-4tRNA-Trp(cca)[72009,72080]

atgtcctaagtgttacggaagcacggaaggctccaacccttcaggcgtgg  
gttcgactcctacaggacatgc  
1-5tRNA-Pro(tgg)[72723,72796]  
caggcacggggaagatggtaatccgttggctttggaagcctaagaaactc  
ggttcgattccgaggtgcctgacc  
1-6tRNA-Pro(tgg)[72930,73005]  
cgggatatagtcagcttggtcagagcgctgcatttgggatgcagaagtc  
gctggttcgaatccagttatcccgac  
1-7tRNA-Ile(tat)[75913,75986]  
gcgcctgtacataacggtcgatgcctctgtctataagcagacgatagg  
gggttcaattccctccaggcgtac  
1-8tRNA-Ser(gga)[76553,76638]  
ggaaagtaagcgattggctagcaggcatcttgaacgggtgctaaggggtg  
tacagcccggtgggttcgattccaggcttccgc  
1-9tRNA-Ser(tga)[76879,76965]  
ggaaatgttaacgttggcagcgtggaaggctcttgaagcctacgccgg  
tgaaacggcgcgtcggttcgaatccgaccatttccgc  
1-10tRNA-Asp(gtc)[78881,78957]  
gcgtctgtagtatagctcgtccaatgcacctgattgtcaatcaggaaat  
cgcgggttcaaataccgtcaggcgcgc  
1-11tRNA-Asp(gtc)[79822,79893]  
cccgcatagtgtagtggaacacgatacgtgtgcagcgtattatcgagg  
gttcaattccctctgtcgggac  
1-12tRNA-Glu(ctc)[84530,84606]  
gtcccggtgtgtctagtttggctagatacttgactctcaatcaagagga  
cacgggttcaaataccgttcggagtac  
1-13tRNA-Glu(ttc)[84653,84728]  
gccccgttagtctagtggcctaggattccagactttcaatctcgagaaac  
gtcgggtcgaatccgacacggggtac  
1-14tRNA-Val(tac)[84807,84880]  
gcgggtgtcgtctagcggctaaggccccatccttacaagatgggtcatcgg  
aggttcgagtcctctcaccgtac  
1-15tRNA-Leu(tag)[85156,85231]  
gcgccgttgacgggaactggcatacctagttgacttagaatcaactgctt  
gggagttcgactctcccacggcgtac  
1-16tRNA-Leu(tag)[85837,85919]  
gcgcctgtggtggaatttaggtagacacgctggctcttaggaaccagttct  
tcggagtcgaggttcaagtcctgtcaggcgtac  
1-17tRNA-Gly(gcc)[86303,86374]  
tccgtagtggtgtagtggaacacgtcaccttgccaaggtgaagttgcga  
gttcgattctcgtctacgggac  
1-18tRNA-Ala(tgc)[87077,87149]  
gggcgattagtgtaatggtagcacgtctgtttgcaagcagatagaggg  
ggttcgagtcccccattgtccac

1-19tRNA-Lys(ctt)[87307,87382]  
gattcggtcgcacagctctggcagtgcaaaggactctaacccttgagaac  
gtgggttcaaatcccacccgaatcac  
1-20tRNA-Asn(gtt)[88535,88612]  
tcccacgatacacctgtgtggctcggtagcagactgttaatctgccgg  
tcgctggttcgactccagccgtgggagc  
1-21tRNA-Asn(gtt)[89144,89217]  
tggcctatagcttaatcggcagagcgggtggtgttaccaatctggtgt  
aggttcgaatcctgctaggtcagc  
1-22tRNA-Arg(cct)[89973,90045]  
gtccctatagtttagaggatagaacgtcactctcctaaagtgaagacgca  
ggttcgactcctgctggggatac  
1-23tRNA-Ile(gat)[90283,90358]  
gggagcgtagctcagctcggcggagcaatgcactgataatgcatcggtc  
gctggttcaaatccagccgttctac  
1-24tRNA-Ala(ggc)[90362,90434]  
ggggtcgtagcataacggaatgcacttgtaggcatacaagcattgtg  
ggttcaaataccatcgactccac  
1-25tRNA-Lys(ctt)[90603,90676]  
gctccggtagctcagttggcagagcaggggactctaatacctcgtgcgc  
tggttcaagtcagttcggagtac  
1-26tRNA-Lys(ttt)[90803,90878]  
gttccagtcgcacagctcgttagtgcaattgacttttaatcttgggac  
gtgggttcgaatcccactggaccac  
1-27tRNA-Met(cat)[92544,92616]  
ggcagtggtgaaacggctatcacgttcccctcataagggaatacgaa  
ggttcgattccttcattgctac  
1-28tRNA-Met(cat)[92617,92688]  
ttgcagggttagtgaaacggatcacgtagggtcctaatacctaattcct  
gttcgaatcagggcctgcccc  
1-29tRNA-Tyr(gta)[93079,93161]  
gcgtaagcggcgaagttggagagacgcggtggtctgtaaaaccattcctt  
cgggtgagtcagttcgaatcgaccttacgcac  
1-30tRNA-His(gtg)[93487,93562]  
gggttggtagctcaattggattagagcgctgcgttgtggtcgagtggtt  
gagggttcgagtccttcctccac  
1-31tRNA-Phe(gaa)[93744,93816]  
gggcatgtagctcagttggtagagcgtcgggtgaagtaccgagtcgcgag  
ggttcgattccctacttggccac  
1-32tRNA-Cys(gca)[94407,94481]  
gaggtagaagcaacgggtgtgccgacagctctgcaaaactgttcgattt  
ggagttcgactctcctctatctctc  
1-33tRNA-Thr(tgt)[94497,94572]  
gcctcgttagctcatttggtgtagagcgacgctctgtaaagcgtagggtg



```

gtcgggtcgaaccgacacgaggctc
1-34tRNA-Thr(ggt)[94665,94738]
gcctagttagtacagtggtagaacatttccttggtacgaaaaggctcgt
gggttcgattcccacactaggctc
1-37tRNA-Leu(gag)[102844,102926]
gcgctcatgggtggaatggcagacacactagactgagactctaggccctta
agggcggtccgggttcgactcccggtggcgctac
1-38tRNA-Val(gac)[103328,103399]
acccgcttagctcaatggtagagcgttgttcgacacacaagagacgtga
gttcgattctctcagtggttac
1-39tRNA-Leu(caa)[103870,103944]
ggccctgtagcagaatggcatatgcggtccctcaaaaggaatgtcaatg
tgggttcgagtcctcagggctac
1-40tRNA-Ser(gct)[104174,104257]
ggaaggtaagcaggggtctcgcaggttggttgtaaccaactggactgt
aaaagggtccgggttcgaatcctctgccttcgcg
1-41tRNA-Gln(ttg)[114821,114901]
tccccagttgctctgttggtagggccgctgactttgaatcaggatta
gcgacgttggttcgaatccagcctggggagc
>MF347636.1 Streptomyces phage NootNoot, complete genome
1-1tRNA-Thr(cgt)[14356,14427]
gccccgctggcgtaatggtaacgcacttcttcgtaatgaagagtaaga
gttcgattctcttcggggctc
1-2tRNA-Gly(tcc)[71446,71517]
gcatcggtagttaatggtagaacgtctgacttccaatcagacagcgcg
gttcgattccgctcggtgctc
1-3tRNA-Gln(ctg)[71639,71713]
tccccgtggtccgtgtggctggccactgagactctgaatctcaggtacg
taggttcgactcctgccgggggagc
1-4tRNA-Trp(cca)[71801,71874]
gcatccttagtgaatggtttagcacacgagctccaacaccttagagt
gggttcgattcctacaggatgtgc
1-5tRNA-Pro(tgg)[72744,72816]
caggcacggggaagatggtaatccgttggtttggaagcctaagaaactc
ggttcgattccgaggtgcctgac
1-6tRNA-Pro(tgg)[72820,72895]
cgggatatagctcagcttggtcagagcgctgcatttgggatgcagaagtc
gctggttcgaatccagttatcccgac
1-7tRNA-Ile(tat)[75889,75963]
gcgccagtagcataacggttcaatgcagtaggcttatctaccgagag
aaggtcaattccttctggcgctac
1-8tRNA-Ser(gga)[76483,76568]
ggaaagtaagcgattggctagcaggtatcttgaacggtaccaaggggtgt
tacagcccggctgggttcgattcccaggctttccgc

```

1-9tRNA-Ser(tga)[76809,76895]  
ggaggcacgcattggtgggcttatcggtcttgaaaaccgtgatggcgtag  
tgatatgccgtgggggttcgattccctctgtctccgc  
1-10tRNA-Asp(gtc)[78270,78346]  
gcgtctgtagtatagtctggccaatgcacctgattgtcaatcaggaaat  
cgcggggtcaaatcccgtcaggcgcgc  
1-11tRNA-Asp(gtc)[78786,78857]  
cccgccgtggtgtaatggtaacatactgcgttgtcagcgcaatgtcagg  
gttcgattcccttcgtcgggac  
1-12tRNA-Glu(ctc)[83499,83570]  
gctcctatagtctaagggtaggatacaagattctcaatcttgggtcgga  
gttcaattctccgtaggagtac  
1-13tRNA-Glu(ttc)[83824,83898]  
gccccgttggctagcggtaggataccggactttcaatccgtgtgaacg  
tcggttcgaatccgacacggggtac  
1-14tRNA-Val(tac)[84157,84228]  
gccccgttagctcaatgggagagcggcggtttacacaccgtatacgggg  
gttcgattccctcactgggtac  
1-15tRNA-Leu(tag)[84490,84565]  
gcgccgttgacgggaactggcatacctagttgacttagaatcaactgctt  
gggagttcgactctcccacggcgtac  
1-16tRNA-Leu(tag)[84704,84778]  
gcgtcggtagcccaatggcaggaggcaccagtcttaggaactggacagtg  
tgagttcgagtctacccggcgtac  
1-17tRNA-Gly(gcc)[85102,85173]  
tccgtagtggtgtagtggaacatacctccttgccaaggaggcgttgcga  
gttcgattctcgtctacgggac  
1-18tRNA-Arg(tct)[85314,85387]  
gccctggtagcgtagtggaacgcggctgtcttctaaacagttacaggc  
aggttcgattcctgtccagggtac  
1-19tRNA-Ala(tgc)[86009,86081]  
gggcgattagtgttaatggtagcacgtcagtttgcacactgatagagg  
ggttcgagtccccattgtccac  
1-20tRNA-Lys(ctt)[86247,86321]  
gattcagtcgcagaattggtactgaaaagactcttaatctttgaggatg  
tgggttcgagtcacacatgaatcac  
1-21tRNA-Asn(gtt)[87180,87257]  
tccggtggggctactattggcagtagcgacgagctgttaactcgtttccc  
tgtaggttcgattcctgcctccggagcc  
1-22tRNA-Asn(gtt)[87902,87974]  
tggcctatagcttaacggcagagcgattgactgttaatcaattaggtgct  
ggttcgaatccagctaggtcagc  
1-23tRNA-Arg(cct)[89645,89717]  
gtctccatagttcaaggacagacaagactctcctaaagtctagatgca

ggttcgaatcctgctgggatac  
1-24tRNA-Ile(gat)[89763,89838]  
gggagcgtagctcagctcgtcggagcaatgcactgataatgcatcggtc  
gctgggtcaaatccagccgttcctac  
1-25tRNA-Ala(ggc)[89911,89984]  
ggggcgtagcataactggtaatgcacttgatggcatacaagcgattgt  
gggttcaaatcccatcgactccac  
1-26tRNA-Lys(ctt)[90197,90270]  
gctccggtagctcagttggcagagcaggggactctaatcctcgtgtcgc  
tggttcaagtcagttcggagtac  
1-27tRNA-Lys(ttt)[90397,90472]  
ggtccagtcgcacagctcggtagtgcaattgacttttaattttgtggac  
gtgggtcgaatcccactggaccac  
1-28tRNA-Arg(tcg)[90807,90880]  
gcccttttagctcactggatagagcgatggtcttcgaagccatgcgtagg  
gagttcgattctctcaaggggcac  
1-29tRNA-Met(cat)[91981,92053]  
ggcagtggtgaaacggctalcacgttcccctcataagggaaaatcgaa  
ggttcgattccttcattgctac  
1-30tRNA-Met(cat)[92054,92125]  
ttgcaggttagtgaaacggatcacgtagggctcataatcctaaattcct  
gttcgaatcagggcctgcccc  
1-31tRNA-Tyr(gta)[92755,92837]  
gcatgagcggcgaaagttggagagtcgcggcggctgtaaaaccgttctct  
agggtgagtcagttcgaatctgacctcatgcac  
1-32tRNA-His(gtg)[93163,93238]  
gggttggtagctcaattggattagagcgctgcgttggtcgcagtggtt  
gagggttcgagtccttcctccac  
1-33tRNA-Phe(gaa)[93420,93492]  
gggcatgtagctcagttggtagagcttcggtgtgaagaccgagtcgag  
ggttcgattcctactgcccac  
1-34tRNA-Cys(gca)[94086,94161]  
ggggtagatgtagcgggtgctgccgacagtctgcaaaactgttcgtatat  
tggagttcgactctcctctatccctc  
1-35tRNA-Thr(tgt)[94177,94252]  
gccaccttagctcatttggtgtagagcgacgctcttgtaaagcgtaggcg  
gtcgggtcgaaccgacaggtggctc  
1-36tRNA-Thr(ggt)[94345,94416]  
gccccatagtgtagtggaacacatatccttggtacggatatatcgtc  
agttcgattctgactgggggat  
1-37tRNA-Arg(acg)[94547,94620]  
ctctccataggctaattggacaaaccagagtgtctacgaacgtcaattgt  
gggttcgagtcgccgctggagagac  
1-39tRNA-Ala(ggc)[97594,97668]

tgacacgtaattcaattggcagaatcaatgcccttggccaggtaggtta  
gaggttcgagtcctctcgtgacagc  
1-40tRNA-Leu(gag)[103012,103094]  
gcgcccattggtggaatggtagacacactggactgagactccaggctcgaa  
tgagcgtccgggttcgactcccgtgggcgtac  
1-41tRNA-Val(gac)[103532,103603]  
acccgcttagctcaatggtagagcgttgctcgacacgcaagagacgtga  
gttcaattctctcagtgggtac  
1-42tRNA-Leu(caa)[104033,104109]  
ggccttagtagagaatttggtatatgcgctggtctcaaaaaccgggtcaa  
tcgagggttcgagtcctcgtcagggtac  
1-43tRNA-Ser(gct)[104343,104426]  
ggaaggtgagcgagaggtctcgaggtatttgctaaactgctgggctgt  
aaaaggttcggggttcgaatcctcctcctccgc  
1-44tRNA-Gln(ttg)[114474,114554]  
tcccagttgctctgttggtagggcgccgtgactttgaatcaggacta  
gcgacgtaggttcgaatcctgcctggggagc

>MF347637.1 Streptomyces phage Paradiddles, complete genome

1-1tRNA-Thr(cgt)c[14347,14418]  
gccccgctggcgtaatggtaacgcactctttcgtaatgaagagtaaga  
gttcgattctcttcggggctc  
1-2tRNA-Gly(tcc)[71710,71781]  
gcatcggtagttaatggtagaacgtctgacttccaatcagacagcgcg  
gttcgattcccgtcgtgctc  
1-3tRNA-Gln(ctg)[71788,71862]  
tccccgtgggtccgtgtggctggccactgagactctgaatctcaggtacg  
taggttcgactcctgccgggggagc  
1-4tRNA-Trp(cca)[71950,72023]  
gcatccttagtgaatggttagcacacgagcttccaaacctcttagagt  
gggttcgattcctacaggatgtgc  
1-5tRNA-Pro(tgg)[72893,72965]  
caggcacggggaagatggtaatccgttggtttggaagcctaagaaactc  
ggttcgattccgaggtgcctgac  
1-6tRNA-Pro(tgg)[72969,73044]  
cgggatatagctcagcttggtcagagcgctgcatttgggatgcagaagtc  
gctggttcgaatccagttatcccgc  
1-7tRNA-Ile(tat)[76038,76112]  
gcgccagtagcataacggttcaatgcagtaggcttatctaccgagag  
aaggttcaattcctcctggcgtac  
1-8tRNA-Ser(gga)[76632,76717]  
ggaaagtaagcgattggctagcaggtatcttgaacggtaccaagggtgt  
tacagcccggctgggttcgattcccaggctttccgc  
1-9tRNA-Ser(tga)[76958,77044]  
ggaggcacgcattggtgggcttatcggtcttgaaaaccgtgatggcgtag

tgatatgccgtgggagttcgaatctctctgtctccgc  
1-10tRNA-Asp(gtc)[80172,80248]  
gcgtctgtagtatagtctggccaatgcacctgattgtcaatcaggaaat  
cgcggttcaaataccgtcaggcgcgc  
1-11tRNA-Asp(gtc)[80688,80759]  
cccggcgtgggtgaatggtaacatactgcgttgtcagcgcaatgtcgagg  
gttcgattcccttcgtcgggac  
1-12tRNA-Glu(ctc)[85797,85868]  
gctcctatagtctaagggtaggatacaagattctcaatcttggtcgga  
gttcaattctccgtaggagtac  
1-13tRNA-Glu(ttc)[86122,86196]  
gccccgttggctagcggtaggataccggactttcaatccgtgtgaacg  
tcggttcgaatccgacacgggtac  
1-14tRNA-Val(tac)[86455,86526]  
gccccgttagctcaatgggagagcggcggtttacacaccgtatacgggg  
gttcgattccctcactgggtac  
1-15tRNA-Leu(tag)[86788,86863]  
gcgccgttgacgggaactggcalacctagttagcttagaatcaactgctt  
gggagttcgactctcccacggcgtag  
1-16tRNA-Leu(tag)[87002,87076]  
gcgtcggtagcccaatggcaggaggcaccagtcttaggaactggacagtg  
tgagttcgagttcaccggcgtag  
1-17tRNA-Gly(gcc)[87400,87471]  
tccgtagtgggtagtggtaacatactccttgccaaggaggcgttgca  
gttcgattctcgtctacgggac  
1-18tRNA-Arg(tct)[87612,87685]  
gccctggtagcgtagtggataacgcggctgtctttaaacttacaggc  
aggttcgattcctgtccagggtac  
1-19tRNA-Ala(tgc)[88307,88379]  
gggcgattagtgttaatggtagcacgtcagtttgcacactgatagagg  
ggttcgagtcacccattgtccac  
1-20tRNA-Lys(ctt)[88545,88619]  
gattcagtcgcagaattggtactgaaaagactcttaactttgaggatg  
tgggttcgagtcacacgtgaatcac  
1-21tRNA-Asn(gtt)[89478,89555]  
tccggtggggctactattggcagtagcgacgagctgttaactcgtttccc  
tgtaggttcgattcctgcctccggagcc  
1-22tRNA-Asn(gtt)[90200,90272]  
tggcctatagcttaacggcagagcgattgactgttaatcaattaggtgct  
ggttcgaatccagctaggtcagc  
1-23tRNA-Arg(cct)[91938,92010]  
gtctccatagttcaaggacagacaagactctcctaaagtctagatgca  
ggttcgaatcctgctggggatcac  
1-24tRNA-Ile(gat)[92056,92131]

gggagcgtagctcagctcgtcggcgagcaatgcactgataatgcatcggtc  
gctggtcaaaccagccgttcctac  
1-25tRNA-Ala(ggc)[92204,92276]  
ggggctcgtagcataacggaatgcacttgatggcatacaagcgattgtg  
ggtcaaaccatcgactccac  
1-26tRNA-Lys(ctt)[92500,92573]  
gctccggtagctcagttggcagagcaggggactcttaatcctcgtgcgc  
tggtcaagtcagttcggagtac  
1-27tRNA-Lys(ttt)[92700,92775]  
gtccagtcgcacagctcgttagtgcaattgacttttaatctttgtggac  
gtgggtcgaatccacctggaccac  
1-28tRNA-Arg(tcg)[93110,93183]  
gcccttttagctcactggatagagcgatggcttcgaagccatgcgtagg  
gagttcgattctctcaaggggcac  
1-29tRNA-Met(cat)[94284,94356]  
ggcagtggtgaaacggctatcacgttccctcataagggaaaatcgaa  
ggttcgattcctccattgctac  
1-30tRNA-Met(cat)[94357,94428]  
ttgcaggttagtgaaacggtatcacgtagggtcataatcctaaattcct  
gttcgaatcagggcctgcccc  
1-31tRNA-Tyr(gta)[95058,95140]  
gcatgagcggcgaagttggagagtcgcggcggctgtaaaaccgttctct  
agggtagtcagttcgaatctgacctcatgcac  
1-32tRNA-His(gtg)[95466,95541]  
gggttggtagctcaattggattagagcgctgcgttggtgcgagtggtt  
gagggttcgagtccttcctccac  
1-33tRNA-Phe(gaa)[95723,95795]  
gggcatgtagctcagttggtagagcttcggtgtgaagtaccgagtcgag  
ggttcgattccctactgcccac  
1-34tRNA-Cys(gca)[96389,96464]  
ggggtagatgtagcgggtgctgccgacagctcgcaaaactgttcgtatat  
tgagttcgactctcctctatccctc  
1-35tRNA-Thr(tgt)[96480,96555]  
gccaccttagctcatttggtgtagagcgacgctctgtaaagcgtaggcg  
aagagttcgaaactcttaggtggctc  
1-36tRNA-Thr(ggt)[97158,97229]  
gccccatagtctagtggtaacacatatccttggtacggatatatcgtc  
agttcgattctgactgggggat  
1-37tRNA-Arg(acg)[97360,97433]  
ctctccataggctaattggacaaaccagagtgtctacgaacgtcaattgt  
gggttcgagtcgccgctggagagac  
1-39tRNA-Ala(ggc)[100407,100481]  
tgtcacgtaattcaattggcagaatcaatgcccttggccagggtaggta  
gaggttcgagtcctctcgtgacagc

1-40tRNA-Leu(gag)[105387,105469]  
 gcgcccattggtggaatggtagacacactggactgagactccaggctcgaa  
 tgacggtccgggtcgactcccgtggcggtac  
 1-41tRNA-Val(gac)[105907,105978]  
 acccgcttagctcaatggtagagccttgctcgacacgaagagacgtga  
 gttcaattctctcagtggtac  
 1-42tRNA-Leu(caa)[106408,106484]  
 ggctctgtagcagaatttggtatatgcgctggtctcaaaaaccgggtcaa  
 tgcgggttcgagtcctcagggtac  
 1-43tRNA-Ser(gct)[106718,106801]  
 ggaaggtgagcgagaggtctcgagtagtttgctaaactgctgggctgt  
 aaaaggttcgggttcgaatcctcctcctccgc  
 1-44tRNA-Gln(ttg)[116849,116929]  
 tcccagttgctctgtttgtagggccgctgactttgaatcaggacta  
 gcgacgtaggttcgaatcctgcctggggagc  
 >MF347638.1 Streptomyces phage Peebs, complete genome  
 1-1tRNA-Thr(cgt)[16513,16585]  
 gcctcattagtgtaaacggaacatacttccttcgaacgaagtgctcct  
 ggttcgactccgagatggggctc  
 1-2tRNA-Gly(tcc)[71869,71940]  
 gcatcggtagtttaatggtagaacgtctgactccaatcagacagcgcg  
 gttcgattcccgtcgggtgctc  
 1-3tRNA-Gln(ctg)[72058,72130]  
 tcccctttggtgaaccggcaacacagcagactctgaatctgtagttcct  
 agttcgaatctaggttggggagc  
 1-4tRNA-Trp(cca)[72338,72409]  
 atgtccttcgtataatggtagtacaagagattccaaacctcttagcgtgg  
 gttcgattcctacaggacatgc  
 1-5tRNA-Pro(tgg)[73284,73356]  
 cagggtcggggaagatggtaatccgttggtttggaaacctaaacaccc  
 ggttcgattccggggcacctgac  
 1-6tRNA-Pro(tgg)[73360,73435]  
 cgggatatagctcagcttggtcagagcgtgcatttgggatgcagaagtc  
 gctggttcgaatccagttatcccgc  
 1-7tRNA-Ile(tat)[76433,76507]  
 gcgccagtagcataacggttcaatgcagtaggcttatatcctaccgagag  
 aaggttcaattcctcctggcggtac  
 1-8tRNA-Ser(gga)[77027,77112]  
 ggaaggtaaagcattggttagcaggagcttggaaggctctaagggtgt  
 tacagcccggcagggttcaattccctggcctccgc  
 1-9tRNA-Ser(tga)[77353,77439]  
 ggaggcacgcattggagtgcttataggtcttgaacacctgaaggtgtag  
 tgatatgccgtgggggttcgactccctctgtctccgc  
 1-10tRNA-Asp(gtc)[80544,80620]

gcgtctgtagtatgtctggctaatgcacctgattgtcaatcaggaaat  
cgcggttcaaatacccgtaggcgcgc  
1-11tRNA-Asp(gtc)[80984,81055]  
cccggcgtggtgtaatggaaacacacttcgtgtcagcgaatgtcgagg  
gttcgattcccttcgtcgggac  
1-12tRNA-Glu(ctc)[85888,85959]  
gccctatagtctaaggtaggatacaagattctcaatcttggtcgga  
gttcaattctccgtaggggtac  
1-13tRNA-Glu(ttc)[86216,86290]  
gccccgttggtctagcggtaggataccgactttcaatccgtgtgaacg  
tcggttcgaatccgacacggggtag  
1-14tRNA-Val(tac)[86302,86373]  
gccccgttagctcaatgggagagcggcgcgtttacaccgctatacgggg  
gttcgattccctcactgggtac  
1-15tRNA-Leu(tag)[86527,86602]  
gcgccgttgacgggaactggcatacctagttgacttagaatcaactgctt  
gggagttcgactctcccacggcgtac  
1-16tRNA-Leu(tag)[86741,86815]  
gcgtcgtagcccaatggcaggaggcaccagtcttaggaactggacagtg  
tgagttcgaatctcaccggcgtag  
1-17tRNA-Gly(gcc)[87136,87207]  
tccgtagtgtgaaatggtatcacatggccttgccaaggctaaagcgcga  
gttcgattctcgtctacgggac  
1-18tRNA-Arg(tct)[87314,87387]  
gccctggtagcgtagtgataacgcggctgtcttctaaacagttacagge  
aggttcgattcctgtccagggtac  
1-19tRNA-Ala(tgc)[88007,88079]  
gggcgattagtgttaatggtagcacgtctgtttgcaagcagatagaggg  
ggttcgagtccccattgtccac  
1-20tRNA-Lys(ctt)[88246,88320]  
gattcagtcgcagaattggtactgaaaagactcttaatctttgaggatg  
tgggttcgagtcccacgtgaatcac  
1-21tRNA-Asn(gtt)[89178,89254]  
tccggtggggctactattggcagtagcgacgagctgttaactcgtttccc  
ttaggttcgattcctgcctccggagc  
1-22tRNA-Asn(gtt)[90006,90078]  
tggcctatagcttaacggcagagcgattgactgttaatcaattaggtgct  
ggttcgaatccagctaggtcagc  
1-23tRNA-Arg(cct)[91737,91809]  
gtccctatagttcaagggaagaacaagactctcctaagcttagatgca  
ggttcgaatcctgctggggatac  
1-24tRNA-Ile(gat)[92054,92129]  
gggagcgtagctcagctggtcggagcaatgcactgataatgcacgggtc  
gctggttcaatccagccgttctac



1-25tRNA-Ala(ggc)[92133,92205]  
ggggttgtagcataacggaatgcacttgcattggcatgcaagcgattgtg  
ggttcaaatcccatcgactccac  
1-26tRNA-Lys(ctt)[92424,92497]  
gtcccggtagctcagttggtagagcaggtgactcttaatcatcaggtcca  
cagttcaagtctgtgtcggagtac  
1-27tRNA-Lys(ttt)[92616,92691]  
ggtccagtcgcacagctcgttagtgcaattgacttttaatctttgtggac  
gtgggttcgaatcccacctggaccac  
1-28tRNA-Arg(tcg)[92695,92768]  
gcccttttagctcattggatagagcgttggtcttcgaagccaagcgtagg  
gagttcgattctctcaaggggcgc  
1-29tRNA-Met(cat)[94026,94098]  
ggcagtggtgaaacggctatcacgttcccctcataagggaaaatcgaa  
ggttcgattccttcattgtctac  
1-30tRNA-Met(cat)[94099,94170]  
ttgcagattagtgaacggatcacgctgggctcataatccagaattcct  
gttcgaatcagggctctgcccc  
1-31tRNA-Tyr(gta)[94798,94880]  
gcatgagcggcgaagttggagaggcgcggtggtctgtaaaccattcctt  
cgggtgagtcagttcgaatctgacctcatgcac  
1-32tRNA-His(gtg)[95010,95082]  
gtgacgttggtgtaaatggtggcatagaagattgactcttcagaggcg  
ggttcgattccccacgtcacac  
1-33tRNA-Phe(gaa)[95150,95222]  
gggcatgtagctcagttggtagagcgtcgggtggaagtaccgagtcgag  
ggttcgattccctacttgccac  
1-34tRNA-Cys(gca)[95806,95880]  
gaggtagaagcagcgggtgctgccgacagtctgcaaaactgtttgtatt  
ggagttcaactctcctctatctctc  
1-35tRNA-Thr(tgt)[95930,96005]  
gccaccttagctcatttggtgtagagcgcgctctgtaaagcgtaggcg  
gtcgggtcgaaacccaggtggctc  
1-36tRNA-Thr(ggt)[96097,96170]  
gcctcgttagtgctaaggttaacacatatccttggtacggatataaaga  
gagttcgattctctcacaggctc  
1-37tRNA-Arg(acg)[96339,96412]  
ctctccataggctaattggataaaccagagtgtacgaacgctcaattgt  
gggttcgagtcctcggtggagagac  
1-39tRNA-Ala(ggc)[99595,99670]  
tgtcacgtaattcaatcaggcagaatcaatgcccttgccagggtaggtt  
agaggttcaaatcctctcgtgacagc  
1-40tRNA-Leu(gag)[104809,104891]  
gcgccccatggtggaatggtagacacactagactgagactctaggctcgaa

tgagcgtccgggtcgactcccgggtggcggtac  
 1-41tRNA-Val(gac)[105328,105399]  
 acccgcttagctcaatggtagagcgctgctcgacacgcaggagacatga  
 gttcaattctcttagtgggtac  
 1-42tRNA-Leu(caa)[105825,105901]  
 ggctctgtagcagaatcaggtatatgcgccggtctcaaaccgggtcaa  
 tgtgggttcgagtcctcatcagggtac  
 1-43tRNA-Ser(gct)[106135,106218]  
 ggaaggtgagcgagaggtctcgaggtagttgctaaactgctgggtgt  
 aaaaggctcgggttcgaatcctcctcctccgc  
 1-44tRNA-Gln(ttg)[116332,116412]  
 tccccagttgctctgttggtagggccgctgacttgaatcaggacta  
 gcgacgtagggtcgaatcctgcctggggagc  
 >MF347639.1 Streptomyces phage Samist12, complete genome  
 1-1tRNA-Thr(cgt)c[17283,17355]  
 gccccattagtgtaacggaacatacttccttcgtaacgaagtgtcctc  
 ggttcgactccgagatggggtc  
 1-2tRNA-Gly(tcc)[73311,73383]  
 gcatcggtagtttaatggtagaacagtgactccaatcattcagcgcg  
 gttcgattcccgtcgggtgctcc  
 1-3tRNA-Gln(ctg)[73514,73588]  
 tccccgtggtccgtgtggctggccactgagactctgaatctcaggtacg  
 taggttcgactcctgccgggggagc  
 1-4tRNA-Trp(cca)[73716,73787]  
 atgccctaagtgttacggtagcacgttggtctccaaaacaaaagcgtag  
 gttcgactcctacaggcggtgc  
 1-5tRNA-Pro(tgg)[74663,74735]  
 caggtgcggggaagatggtaatccgtggttttgaaacctaaagacaccc  
 ggttcgattccggggcacctgac  
 1-6tRNA-Pro(tgg)[74739,74814]  
 cgggatatagtcagcttggtcagagcgctgcatttgggatgcagaagtc  
 gctggttcgaatccagttatcccgc  
 1-7tRNA-Ile(tat)[77812,77886]  
 gcgccagtagcataacggttcaatgcagtaggcttatatcctaccgagag  
 aaggttcaattccttctggcggtac  
 1-8tRNA-Ser(gga)[78406,78491]  
 ggaaggtaagcgattggttagcaggagctcttgaaaggctctaagggtgt  
 tacagcccggcagggttcaattccctggccttccgc  
 1-9tRNA-Ser(tga)[78732,78818]  
 ggaggcacgcattggagtgcttataggtctgaaaaccttgaaggttag  
 tgatatgccgtgggggttcgactccctctgtctccgc  
 1-10tRNA-Asp(gtc)[81923,81999]  
 gcgtctgtagtatgtctgttctaatgcacctgattgtcaatcaggaaat  
 cgcgggttcgaatcccgtcaggcgcg

1-11tRNA-Asp(gtc)[82363,82434]  
cccggcgtggtgtaatggaaacacacttcgtgtcagcgaaatgtcgagg  
gttcgattcccttcgtcgggac  
1-12tRNA-Glu(ctc)[87270,87341]  
gccctatagtctaagggtaggatacaagattctcaatcttgggtcgga  
gttcaattcctcgtaggggtac  
1-13tRNA-Glu(ttc)[87598,87672]  
gccccgttggtctagcggtaggataccggactttcaatccgtgtgaacg  
tcggttcgaatccgacacgggggtac  
1-14tRNA-Val(tac)[87684,87755]  
gccccgttagctcaatgggagagcggcgcgtttacaccgcgtatacgggg  
gttcgattccctcactgggtac  
1-15tRNA-Leu(tag)[87909,87984]  
gcgccgttgacgggaactggcatacctagttgacttagaatcaactgctt  
gggagttcgactctcccacggcgtag  
1-16tRNA-Leu(tag)[88123,88197]  
gcgtcggtagcccaatggcaggaggcaccagtcttaggaactggacagt  
tgagttcgagttcaccggcgtag  
1-17tRNA-Gly(gcc)[88520,88591]  
tccgtagtggtgaaatggtatcacatggccttgccaaggctaaagcgca  
gttcgattctcgtctacgggac  
1-18tRNA-Arg(tct)[88698,88771]  
gcctcgttagcgtagtaggataacgcggctgtcttctaacagttacaggc  
aggttcgattcctgtccagggtac  
1-19tRNA-Ala(tgc)[89391,89463]  
gggcgattagtgttaatggtagcacgtctgtttgcaagcagatagagg  
ggttcgagtcctccattgtccac  
1-20tRNA-Lys(ctt)[89630,89704]  
gattcagtcgcagaattggtactgaaaagactcttaatctttgaggatg  
tgggttcgagtcctccacctaatac  
1-21tRNA-Asn(gtt)[90562,90638]  
tccggtggggctactattggcagtagcgcagagctgttaactcgttccc  
ttaggttcgattcctgcctccggagc  
1-22tRNA-Asn(gtt)[91390,91462]  
tggcctatagcttaacggcagagcgattgactgttaataataggtgct  
ggttcgaatccagctaggtcagc  
1-23tRNA-Arg(cct)[93121,93193]  
gtccctatagttcaagggaagaacaagactctcctaaagtctagatgca  
ggttcgaatcctgctggggatac  
1-24tRNA-Ile(gat)[93438,93513]  
gggagcgtagctcagctggtcggagcaatgcactgataatgcacgggtc  
gctgggtcaaatccagccgttcctac  
1-25tRNA-Ala(ggc)[93517,93589]  
gggggttagcataacggtaatgcacttgcattggcatgcaagcgattgtg

ggttcaaatcccatcgactccac  
1-26tRNA-Lys(ctt)[93808,93881]  
gctccggtagctcagttggtagagcaggtgactcttaatcatcaggtcca  
cagttcaagtctgtgtcggagtac  
1-27tRNA-Lys(ttt)[94000,94075]  
ggtccagtcgcacagctctggtagtgaattgacttttaatctttgtggac  
gtgggttcgaatcccacctggaccac  
1-28tRNA-Arg(tcg)[94079,94152]  
gcccttttagctcattggatagagcgttggcttcgaagccaagcgtagg  
gagttcgattctctcaagggcg  
1-29tRNA-Met(cat)[95410,95482]  
ggcagtggtgaaacggctatcacgttcccctcataagggaatcgaa  
ggttcgattcctccattgctac  
1-30tRNA-Met(cat)[95483,95554]  
ttgcagattagtgaacggtatcacgctgggctcataatccagaattcct  
gttcgaatcaggtctgcccc  
1-31tRNA-Tyr(gta)[96182,96264]  
gcatgagcggcgaagttggagagacgcggtggtctgtaaaaccattcct  
cgggtgagtcagttcgaatctgacctcatgcac  
1-32tRNA-His(gtg)[96394,96466]  
gtgacgttgttgaatgggtgcatagaagattgactcttcagaggcg  
ggttcgattccccacgtcacac  
1-33tRNA-Phe(gaa)[96534,96606]  
gggcatgtagctcagttggtagagcgtcgggtgaagtaccgagtcgcgag  
ggttcgattccctacttggccac  
1-34tRNA-Cys(gca)[97190,97264]  
gaggtagaagcagcgggtgctgccacagctcgaaaactgtttgtatt  
ggagttcaactctcctctatctc  
1-35tRNA-Thr(tgt)[97314,97389]  
gccaccttagctcatttggtgtagagcgacgctcttgtaaagcgtaggcg  
gtcgggtcgaaccgacaggtggctc  
1-36tRNA-Thr(ggt)[97481,97554]  
gcctcgtagtgctaatggttaacacatatccttggtacggatataaaga  
gagttcgattctctcacgaggctc  
1-37tRNA-Arg(acg)[97723,97796]  
ctctccataggctaactggataaaccagagtgtctacgaacgtcaattgt  
gggttcgaatcccgtggagagac  
1-39tRNA-Pro(tgg)[101009,101084]  
tgtcacgtaattcaatcaggcagaatcaatgctcttgccagggtaggtt  
agaggttcaaatcctctcgtgacagc  
1-40tRNA-Leu(gag)[106391,106473]  
gcgcccattggtggaatggtagacacactagactgagactctaggctcgaa  
tgacgtccgggttcgactcccgtggcgctac  
1-41tRNA-Val(gac)[106910,106981]

```

accgccttagctcaatggtagagcgctgctcgacacgcaggagacatga
gttcaattctcttagtgggtac
1-42tRNA-Leu(caa)[107406,107482]
ggctctgtagcagaatcaggtatatgcgccggtctcaaacaccgggtcaa
tgtgggttcgagtcctcatcagggtac
1-43tRNA-Ser(gct)[107716,107799]
ggaaggtgagcgagaggtctcgaggtagtttgctaaactgctgggtgt
aaaaggctcggggttcgaatcctcctcctccgc
1-44tRNA-Gln(ttg)[117530,117610]
tcccagttgctctgttgtagggccgcctgacttgaatcaggacta
gcgacgtaggttcgaatcctgcctggggagc
>MF377440.1 Mycobacterium phage Bella96, complete genome
1-1tRNA-Trp(cca)[964,1037]
gggtgtgtagctcaatcggtagagcagcggtctccaaagccgccgttgc
acgttcgagtcgtgccgcgccgc
>MF319184.1 Mycobacterium phage GenevaB15, complete genome
1-1tRNA-Trp(cca)[56831,56903]
atgggcgtggcttgatagggaagcaacggtctccaaagccgtgaaatgca
ggttcgaatcctgccgccgtgc
1-3tRNA-Asn(gtt)[57540,57615]
tggggtatagccacaatggcagtggcaccgggctgtaactcggaagagt
gttggttcgagtcagctaccctagc
1-4tRNA-Ala(cgc)[58532,58604]
cggaatgtgcagcctaattgtaaggcgggagttcgcgactcccgatcca
ggttcgaatcctggcgctccggc
1-5tRNA-Tyr(gta)[58681,58758]
ctcgtcgcgaataggcgatcacagctggctgtaaaccagctccttcgggt
gtgcaggttcgactcctgacggcgagac
1-6tRNA-Gln(ctg)[59048,59119]
tgtctctcgactaacggcaagtcactgggcttgacccagcaattgag
gttcgaatccttgggggacaac
1-7tRNA-Pro(tgg)[59125,59197]
cgggatattggtgtaagggttagcgtaccggcgttgagaccggaagacat
ggttcgagtcctgtatcccgc
1-8tRNA-Phe(gaa)[59736,59811]
cggttcgtagctcagtttgcaagagcgctggcttgaaacccagaggcc
ccaggttcgactcctggcgctccggc
1-9tRNA-Met(cat)[59951,60022]
tgccgggtggtgtaacgggaacatcctggtctcataagtcagggttcgg
gttcgaatcccggctgcgaac
1-10tRNA-Arg(acg)[60292,60370]
cccgtgttgagcaacggagcgctcaatgggctacgaacctatctcgca
tcaggttcgaatcctgtcatcgggtcca
1-11tRNA-His(gtg)[60373,60446]

```

cctctttagctcaatcggtagagcagcggtttgtgaagccgcagacca  
 cggatcgtaccgtgcagggggac  
 1-12tRNA-Cys(gca)[60555,60627]  
 gtcgagatgacagagtgggtatgtgacggctgcaaagccgatctacgcc  
 ggttcaaatccggctctcgattc  
 1-13tRNA-Leu(tag)[60881,60955]  
 ggatctgtagcccaaatggaagaggcggcaggcttagaccctgttcagtg  
 tgggttcgactccctccagattcac  
 1-14tRNA-Leu(caa)[60959,61034]  
 gctcgactaggcaactaggcaagccgcaggcctcaaaagccagtgtgt  
 gtgagttcgattctcacgtcgagtac  
 1-15tRNA-Lys(ctt)[61038,61112]  
 gggatgttggtataaacggcaattactgcagactctaatctgtcaaattc  
 tgggttcgaatcccaggcgtccac  
 1-16tRNA-Ile(gat)[61113,61188]  
 tgtgatgtcgtccaacgggttagggcaccgatctgatacatcggaacca  
 gggttcaactccctgcttcactacca  
 1-17tRNA-Gly(tcc)[61274,61350]  
 ggggtattcatctagtctggctcaggatgcgacactccactgtcgtcac  
 gagggttcgaatccttcatactcacc  
 1-18tRNA-Val(tac)[61397,61468]  
 tccccactcgtccaatgggagggcaccgcgttacaacgcgaggacggga  
 gttcgattctctcgtggggaac  
 1-19tRNA-Thr(agt)[61529,61606]  
 gctggatttgctcatgttggttgagcacctacctagtaagtaggagtac  
 gtcggttcgattccgacatccagcccca  
 1-20tRNA-Ala(tgc)[61665,61735]  
 gggcgcatgttccaaggtggcgaccgaccttgcaaggtgggtggcgag  
 ttcgattctcgtcgcttcac  
 1-21tRNA-Asp(gtc)[61813,61886]  
 cccgtcatctagaggcctaggatgccactctgtcgaagtggtcacac  
 gggttcaaatcccgttggcgggac  
 1-22tRNA-Glu(ctc)[61963,62034]  
 ggttcattgggtaatggcagcattccagattctcaatctggcggcaggg  
 gttcaactcccctatgaactac

>MF537628.1 Rhodococcus phage Bonanza, complete genome

1-1tRNA-Asn(gtt)[1503,1576]  
 tcacgtatagctcaatcggcagagcaacgcactgttaaggcgggggtga  
 aggttcgagtccttctacgtgagc  
 1-3tRNA-Trp(cca)[1702,1776]  
 gggcacgtagctcaattggatagagccccgggtctccaaagccggtggttg  
 ggggttcgagtcctccgggcctgc

>MF189179.1 Rhodococcus phage Yoncess, complete genome

1-1tRNA-Asn(gtt)[1503,1576]

tcacgtatagctcaatcggcagagcaacgcactgttaaggcgggggtga  
 aggttcgagtccttctacgtgagc  
 1–3tRNA–Trp(cca)[1702,1776]  
 gggcacgtagctcaattggatagagccccgggtctccaaagccggtggtg  
 ggggttcgagtcctccgggcctgc  
 >MF467948.1 Streptomyces phage DrGrey, complete genome  
 1–1tRNA–Ala(cgc)c[44692,44764]  
 gaggtggtagaagggcagctcgccctcctcgcgggggccttgaccttga  
 cgtccacccggcggccagcatg  
 >MF472896.1 Mycobacterium phage JoshKayV, complete genome  
 1–1tRNA–Gln(ctg)[4810,4886]  
 ttccccgttcgtctaagcggcaagacaccgggttctggccccggcaatcg  
 aggttcgaatccttgatggggaacca  
 >MF472895.1 Mycobacterium phage Kimona, complete genome  
 1–1tRNA–Trp(cca)[1483,1558]  
 aggcacctagctcaattggtagagcagcgggtctccaaagccgctggttgg  
 ggggttcgagtcctcgggtgtctgcca  
 1–2tRNA–Tyr(gta)[1560,1644]  
 cgcgagatacccaagcggcaacgggagctgcctgtaaagcagtcgccatc  
 tggcttcgcaggttcgagtcctgctctcgcgacca  
 >MF472893.1 Mycobacterium phage MissWhite, complete genome  
 1–1tRNA–Trp(cca)[4198,4273]  
 gtacacgtagctcaattggtagagcagcgggtctccaaagccgccggttcc  
 aggttcgactcctggcgtgtatgcca  
 1–2tRNA–Tyr(gta)[4278,4362]  
 cgcgagatacccaagcggcaacgggatctgactgtaaatcagacgccttc  
 gggcttcgcaggttcgagtcctgctctcgcgacca  
 >MF472892.1 Mycobacterium phage TreyKay, complete genome  
 1–1tRNA–Trp(cca)[979,1052]  
 ggggtcgtagctcaatcggtagagcagcgggtctccaaagccgccggttgc  
 acgttcgagtcgtgccgccccgc  
 >MF158042.1 Shigella phage Sd1, complete genome  
 1–1tRNA–Arg(cct)c[39476,39551]  
 gttctgctggtgtaacaggataacgcagagacctcctaagtctcagttgc  
 tgggttcgagtcagcgcggaacgcca  
 1–2tRNA–Trp(cca)c[39557,39630]  
 atggggtagttcattggtagaatagtgccctccaaaaccaaagaggttg  
 gttcgattccaacatcccggtgcca  
 >MF158038.1 Shigella phage Sf11, complete genome  
 1–1tRNA–Ser(gct)[20558,20645]  
 ggatagttggctgagagccgaaagcggtcggttgtaaccgataaaccg  
 gaaacgggttcacaggttcgaatcctgtactatccgcca  
 1–2tRNA–Arg(tct)[20652,20727]  
 acaccattagctcaatggatagagcagtagccttctaagctattggttgc

aggttcgaatcctgcatggtgtgcc  
 >MF158039.1 Shigella phage Sf12, complete genome  
 1-tRNA-Arg(cct)c[43468,43543]  
 gttctgctggcgtaacaggataacgcagagacctcctaagtctcagttgc  
 tggtcgagtcagcgcggaacacca  
 >MF668282.1 Gordonia phage ShayRa, complete genome  
 1-tRNA-Asn(gtt)[5265,5339]  
 tggctttagctcaacggcagagcgtcggctgttaaccgagtggtgaa  
 ggttcgaatcctccaggccagcca  
 1-2tRNA-Lys(ctt)[5341,5414]  
 gcatccgtagctgagtggttagctctgggctttaaccggagacggag  
 gttcgattctcccgatgcacca  
 1-3tRNA-Gln(ctg)[5416,5488]  
 tccccattcgccaactggcaggacaccggagtctggtccggagatcga  
 ggttcgaatcctcggtaggagc  
 1-4tRNA-Arg(acg)c[48016,48095]  
 tcggttcgctggcgaaggtgcgactcggctgcctacggtgatccggcga  
 tggctccgtcgaggtgtgggaaccgatcc  
 >MF668267.1 Mycobacterium phage Apocalypse, complete genome  
 1-tRNA-Trp(cca)[987,1060]  
 ggggtgtagctcaatcggtagagcagcggctccaaagccgcttgc  
 acgttcgagtcgtgccgcgccgc  
 >MF668269.1 Mycobacterium phage Drake55, complete genome  
 1-tRNA-Gln(ctg)[4936,5009]  
 tccccggtagtcgaatcggtagtgacgctcggctctggaccgagagattg  
 aggttcgagtccttgctggggagc  
 >MF668277.1 Mycobacterium phage MadamMonkfish, complete genome  
 1-tRNA-Arg(cct)[62046,62129]  
 atggcccgtagctcagtcaggtagagcagccttgccccttgccggttgg  
 ttcgtccccggttcaaatccggcgggccttgcc  
 1-2tRNA-Gly(tcc)[62132,62204]  
 gcgcccgtggtcgaattggaaagactcctggcttccaccaggttatgca  
 ggttcgagtcctgtcgggcgctc  
 >MF668284.1 Mycobacterium phage Squint, complete genome  
 1-tRNA-Tyr(gta)[92617,92689]  
 tggcccgtagctcaattggcagagcagccggcggttaattcggcgcgtctc  
 ggttcgagtcggcgggctacc  
 >MF668288.1 Mycobacterium phage Wiks, complete genome  
 1-tRNA-Asn(gtt)[5402,5474]  
 tgacgtgtagctcaatggcagagcaccggctgttaaccggacggttgaa  
 ggttcgagtccttccatgtcagc  
 1-2tRNA-Trp(cca)[5479,5552]  
 gcgctcctagctcaattggtagagcagcggctccaaagccgcgagttcc  
 aggttcgagtcctggggagcgtgc



1-3tRNA-Gln(ctg)[5594,5666]  
 tcctgttcgtctaatacggaagacaccgggctctggaccggcaatcga  
 gggtcgaatccttgatggggagc

>MF773750.1 Mycobacterium phage OKCentral2016, complete genome  
 1-1tRNA-Trp(cca)[3483,3558]  
 aggcacgtagctcaattggaagagcagcggtctccaaagccgcccgttgc  
 aggttcgagtcctgccgtgtctgcc

>GQ979703.1 Lactococcus lactis phage p2, complete genome  
 1-1tRNA-Trp(cca)[26661,26733]  
 tgcgagcatagtatagtggaatgctacagattccaaacctgtaaacgtg  
 gggtcgattcctactgttcgtgt

>GQ303265.1 Mycobacterium phage Pumpkin, complete genome  
 1-1tRNA-Arg(cct)[62256,62339]  
 atggcccgtagctcagtcaggtagagcagccttgccccttgcgggcttgg  
 ttctccccggttcaaatccgggcgggccttgcc  
 1-2tRNA-Gly(tcc)[62342,62414]  
 gcgcccgtggtcgaattggaaagactcctggctccaccaggttatgca  
 gggttcgagtcctgtcgggcgctc

>FJ848884.1 Lactococcus phage CB19, complete genome  
 1-1tRNA-Trp(cca)[28086,28158]  
 tgcgagcatagtataatggtaatgccacagattccaaacctgtaaacgtg  
 gggtcgattcctactgttcgtgt

>FJ848885.1 Lactococcus phage CB20, complete genome  
 1-1tRNA-Trp(cca)[28068,28140]  
 tgcgagcatagtataatggtaatgccacagattccaaacctgtaaacgtg  
 gggttcgattcctactgttcgtgt

>GQ478085.1 Enterococcus phage phiFL2B, complete genome  
 1-1tRNA-Arg(acg)[15189,15263]  
 ttggcgtgtagcattgtggaatgcaactgattacgtgtgagataagatg  
 cgggttcgaatcctgtcacgccaat  
 1-2tRNA-Met(cat)[35911,35984]  
 ggaccattagctcagttggttagagccaaccgctcataacggttaggtca  
 taggttcgagtcctgtatgggtcca

>GQ478087.1 Enterococcus phage phiFL3B, complete genome  
 1-1tRNA-Arg(tcg)[16011,16085]  
 ttggcgtgtagcattgtggaatgcaactgacttcgtgtgagataagatg  
 cgggttcgaatcctgtcacgccaat  
 1-2tRNA-Met(cat)[39360,39433]  
 ggaccattagctcagttggttagagccaaccgctcataacggttaggtca  
 taggttcgagtcctgtatgggtcca

>JF704105.1 Mycobacterium phage Adephagia, complete sequence  
 1-1tRNA-Trp(cca)[1003,1076]  
 ggggtgtgtagctcaatcggtagagcagcggtctccaaagccgcccgttgc  
 acgttcgagtcgtgccgcgccgc

>JF704107.1 Mycobacterium virus George, complete genome

1-tRNA-Trp(cca)[4309,4382]

gggtcagtagctcaattggtagagcagcggtctccaaagccgcgagttgg

aggttcgagtcctccctggccgc

>JF704097.1 Mycobacterium virus Gladiator, complete genome

1-tRNA-Asn(gtt)[5396,5468]

tggcgttagctcaatggcagagccccggctgttaaccgggtggttgaa

ggttcgagtcctccacgccagc

1-2tRNA-Trp(cca)[5472,5545]

gcgttcctagctcaattggtagagcagcggtctccaaagccgcgtgtcc

aggttcgagtcctggggagcgtgc

1-3tRNA-Gln(ctg)[5587,5659]

tccctgttcgtctaatacggtaagacaccgggctctggaccggtaatcga

ggttcgagtccttgatggggagc

>JF704108.1 Mycobacterium phage JoeDirt, complete sequence

1-tRNA-Leu(caa)[61808,61882]

ggctcgttaggcaaattggcaaagccgcgtcactcaaatgacgtgtctg

tgggttcgagtcaccacgggactac

1-2tRNA-Thr(cgt)[61883,61957]

gctgccttagctcagatggctagagcgcgctctcgtaaagcggaggtcg

cgggttcgaggcccgaggcagctc

1-3tRNA-Lys(ctt)[62244,62317]

gcctcgttagctcagttggtagagctgccgactcttaacggtaggtcgc

aggttcaagtcctgcacggggtagc

1-4tRNA-Tyr(gta)[62328,62411]

gcgtcggaggtagctgttggttggtacacctgcctgtaaagcaggcgcgt

tcggcttcgggggttcgattccctcccggcgtagc

1-5tRNA-Trp(cca)[62421,62496]

agctcggtagctcaattggtagagcaacggtctccaaagccgtgggttcc

ccgttcgagtcggggtcgggttgcca

1-6tRNA-Leu(tag)[62914,62988]

ggcccgttaggcgaattggcatagccgccagatttaggttctggtgttc

cgagttcgactctcgggcggggcac

1-7tRNA-Cys(gca)[64210,64283]

gccgctgtggccgagtggttaggcaccggcctgcaaagccggttagtccg

gttcgattccggaggcgggtcca

1-8tRNA-Asn(gtt)[64626,64698]

tcccctgtcgtttaattggcaggacgccgggtgttgccccggtgttta

ggttcgagtcctaacgggggagc

1-9tRNA-Lys(ttt)[64823,64896]

gccctatagctcagttggtagagctgctgacttttaacagtaggtcgc

acgttcgagtcgtcgtgggggcac

>JF704110.1 Mycobacterium virus Packman, complete genome

1-tRNA-Glu(ctc)[5906,5978]

```

    ggtccgttggagtagcggcaactcatctgactctcactcagaagatcgcg
    ggttcaaatcccgacggactac
>JF704113.1 Mycobacterium phage UPIE, complete sequence
    1-tRNA-Leu(caa)[61206,61280]
    ggtcctgtaggcaaattggcaaagccgctcactcaaatgacgtgtctg
    tgggttcgagtcaccacgggactac
    1-2tRNA-Thr(cgt)[61281,61355]
    gctgccttagctcagatggctagagcgcgctctcgtaaagcggaggtcg
    cgggttcgaggcccgaggcagctc
    1-3tRNA-Lys(ctt)[61642,61715]
    gcctcgttagctcagttggtagagctgccgactcttaatcggtaggtcgc
    aggttcaagtcctgcacggggtag
    1-4tRNA-Tyr(gta)[61726,61809]
    gcgtcggaggtagctgttggttggtacacctgcctgtaaagcaggcgt
    tcggcttcgggggttcgattccctcccgcgtag
    1-5tRNA-Trp(cca)[61819,61892]
    agctcggtagctcaattggtagagcagcggctccaaagccgtgggttcc
    ccgttcgagtcggggccgggttgc
    1-6tRNA-Leu(tag)[61893,61967]
    ggaactgtaggcaaactggaaaagccgctgacttaggatcaggtgtttg
    cgagttcgactctcgccagttctac
    1-7tRNA-His(gtg)[61968,62037]
    gctaagtagcttaattggtaaagcggcgttggccgggggtattccgg
    ttcgattccgggcttaagcc
    1-8tRNA-Cys(gca)[63215,63288]
    gccgctgtggccgagtggttaggcaccggcctgcaaagccggttagtccg
    gttcgattccggaggcggtcca
    1-9tRNA-Lys(ttt)c[63569,63643]
    gccctatagctcagttggtagagctatgccttttaagcgacaggtcgc
    aggttcgagtcctgctgggggcacc
>JF704106.1 Mycobacterium phage Anaya, complete sequence
    1-tRNA-Trp(cca)[1035,1108]
    ggggtgtagctcaattggcagagcagcggctccaaagccggttgc
    acgttcgagtcgtgccgcggcgc
>JF704111.1 Mycobacterium phage Rockstar, complete genome
    1-tRNA-Trp(cca)[3699,3772]
    aggcgcgtagctcaattggtagagcggcggctccaaagccgctggctgc
    aggttcgagtcctgccgctctgc
>KU997639.1 Mycobacterium phage Loadrie, complete genome
    1-tRNA-Thr(cgt)[63222,63295]
    gccaccttagctcagttggtagagcagccccttcgtaacgggcaggtcag
    cggttcgactccgctaggtggctc
    1-2tRNA-Pro(tgg)[63693,63767]
    ctggctgtagctcaacttggtagagcgtggcttgggtgccaggggttg

```

caggttcaaatcctgctagccagac  
1-3tRNA-Trp(cca)[64005,64080]  
agctcggtagctcaattggtagagcagcggctctcaaagccgccggttcc  
ccgttcgagtcggggtcgggttgcca  
1-4tRNA-Leu(tag)[64749,64823]  
ggccctctagcccaattggcagaggcacaggttttaggtacctgtcagtg  
cgagttcgagtctcgggggccac  
1-5tRNA-His(gtg)[64824,64893]  
gcttagtagcctagtggtaaggcagcgggttgatccggtgaacctgag  
ttcgattctcagctaaagcc  
1-6tRNA-Gln(ctg)[64898,64972]  
tgaccggtagcacaaactggtagttgcgccgctctggacgcggaggttg  
ttggtcgatcccagctcggtcage  
1-7tRNA-Gly(tcc)[65021,65095]  
gtgccagtaaccatgttggtgggtacctgactccactcaggatttcg  
cgggttcgattcctgtctggcacac  
1-8tRNA-Lys(ctt)[65131,65206]  
gcctcgtagctcagttggtagagctgccgactcttaacggttaggtcac  
aggttcaagtctctgtacgggtacca  
1-9tRNA-Cys(gca)[66388,66460]  
gccgttgtgtccgagtggttagtgccaggctgcaaacttggttagtcgc  
gttcgattcgcggggacggctcc  
1-10tRNA-Asn(gtt)[66995,67068]  
tcctccgtagctcaattggcagagcgcgcgactgtaacgcgtggttgg  
tggttcgagtcacccggttgagc  
1-11tRNA-Lys(ttt)[67262,67336]  
gcccctatagctcagttggtagagcaggagacttttaattctcgggtcct  
aggttcgatccctagtgggggcacc

>JF704098.1 Mycobacterium virus JHC117, complete genome

1-1tRNA-Asn(gtt)[3838,3913]  
tgatctgtagctcaactggcagagcaccggctgtaaccgggtcgttgg  
aggttcgagtcctcccagatcagcca  
1-2tRNA-Trp(cca)[3954,4028]  
aggcacgtagctcaattggtcagagcagcggctctcaaagccgccggtg  
caggttcgagtcctgccgtgtctgc  
1-3tRNA-Leu(cag)[4063,4137]  
ggctcggtaggcaaacaggcaaagccgctgtctcaggaacaggtgcgtg  
agggttcgactccctccgagctac

>KY114934.1 Salmonella phage SP01, complete genome

1-1tRNA-Arg(tct)[80907,80981]  
cggggtgtagtctaaggagaggcaggagtcttctaaattccttatgca  
ggttcgaatcctgtcacctcgcca  
1-2tRNA-Ser(gct)[82599,82687]  
ggaagaatagcataatggtattgcagcagattgctaattctgcggttga

aatatagccttgtgggtcgaattcccacttcttcgcca  
1-3tRNA-Leu(taa)[82986,83062]  
gggggtgaatcgaattggcataggtactggactaaaattcaggtttg  
tgggtcgaatcccaccaccctacca  
1-4tRNA-Tyr(gta)[83945,84031]  
gggaatatcttctaagtggtagcagagctgactgtaaattagttgcat  
tgcgactcgggtggtcgaactccatcttccccacca  
1-5tRNA-Glu(ttc)[84039,84113]  
gcaccatcgtctagcggtaggacaccactttcacagtgggaacacg  
agttcgatcctcgttgggtgtcca  
1-6tRNA-Phe(gaa)[84200,84274]  
gcaccttagctgagatggattagcgcttgcctgaagagcttgagaggt  
cgttcgatacgaacagggtgcacca  
1-7tRNA-Cys(gca)[84907,84982]  
cgaccgttggctgaatggcttaggcgaaggattgcaaactcttttatgt  
gagttcaaattctatgcggtcgtcca  
1-8tRNA-Asn(gtt)[85135,85217]  
gggtcgtagccaagcgggttggcggtaggactgtaatccatgtcgaag  
acaacgtagggtcgaatcctacacggcccgcca  
1-9tRNA-Asp(gtc)[85515,85591]  
gcgaccggggctggcttggtaatggtactcccctgtcacgggagagaatg  
tgggtcgaatcccatcggtcgcgcca  
1-10tRNA-Lys(ctt)[85769,85844]  
acatccatagctcaatggttagagctaccgcctcttaagcggagggttct  
aggttcaagtcctagtggtgtacca  
1-11tRNA-Pro(tgg)[86459,86536]  
ctccgtgtagctcagtttggccagagcgttctggttggggcgatagggtc  
gggggttcaaatcctcccacggagacca  
1-12tRNA-Met(cat)[86543,86620]  
tgcgggttagatctctggcagagatcgtagtctcataagctagaaagag  
gtaggttcgattcctgcaccgcttcca  
1-13tRNA-Lys(ttt)[86810,86888]  
agatcgctagctcaataggttagtagcatccgacttttaacggaaggt  
tctgggttcgagtcacggcgatctacca  
1-14tRNA-Ala(tgc)[87268,87342]  
gggcgaataggtgcagcgggagcacaccagacttgcaatctggtaggag  
ggttcgagtcctctttgtccacca  
1-15tRNA-Leu(tag)[87348,87424]  
gcgtgattgatggaatgggcatacataccgtccttagaagtcgggtttg  
agggttcgaatcccttgtcacgacca  
1-16tRNA-Ser(tga)[87634,87723]  
agaagataggacgtagtggtacgtaactggtcttgaaccagcccgtg  
tagcgatacgggtggttcgactccattatcttgcga  
1-17tRNA-His(gtg)[88288,88364]

gtggctatatcataattgggtaatatgatcctgattgtgaatcaggcctatg  
tggattcgaattccactagccaccca  
1-18tRNA-Gln(ctg)[88826,88899]  
tggagtgtagatcaattggcagatcgtcggcctctgactccgaagggtcc  
tggtcgaccccgagcactccagc  
1-19tRNA-Gln(ttg)[88908,88983]  
tggagagtagtgaacggtagcacacggccttgactccgttaatggt  
aggttcgattcctccttctccagcca  
1-20tRNA-Thr(tgt)[89444,89530]  
gctgggttggcagaatggctgaatgcacctgatttgaatcaggaggagt  
aatcccggtgcaggttcgaatcctgcgcccagcacca  
1-21tRNA-Ile(gat)[90086,90162]  
acttcgtagcttagcgatctaaagcactcggctgataactgagagatcg  
ggggtttaaatccctcccggagtacca  
1-22tRNA-Met(cat)[90259,90334]  
agttagttggcagagtgggtatgcacctccttcatacggagcgactacag  
tggttcaaatccactactaactacca

>KC579452.1 Enterobacteriophage phiKP26, complete genome

1-1tRNA-Arg(cct)[2921,2996]  
gttctgctggcgtaacaggataacgcagagacctcctaagtctcagttac  
tggttcgagtcagtcggaacacca

>MF185728.1 Mycobacterium phage Finemlucis, complete genome

1-1tRNA-Thr(cgt)[63805,63878]  
gccaccttagctcagttggtagagcagccccttcgtaacgggcaggtcag  
cggttcgactccgctaggtggctc  
1-2tRNA-Pro(tgg)[64100,64175]  
cggcccaaggtgaatggcttgcattgaggcgtttggatcgccggggttcc  
ctgttcgactcggggtgggcccacca  
1-3tRNA-Trp(cca)[64786,64859]  
agcaggaggagcacgattggttgtagcagcgattccaacccgcaggttgc  
cggttcgaccccggtcctcgttgc  
1-4tRNA-Leu(tag)[64881,64955]  
ggtcccgtagcccaattggcagaggcgaggttttaggtacctgtcagtg  
tgcgttcgagtcgcaccgggaccac  
1-5tRNA-His(gtg)[64955,65027]  
cgcgaggtagcttaagtagtaaagcccccgactgtgactcgggtgattcg  
ggtgcaagtcccggcctgtcgcc  
1-6tRNA-Gln(ctg)[65030,65105]  
tggccgtagcaccaattaggcagttgcgcccgaatctgactccggaggtt  
ccaggttcgattcctgggtggccagc  
1-7tRNA-Gly(tcc)[65245,65319]  
gtgctagtaaccatgttggctgggtgccactcttccaagtggatttcg  
cgtgttcgattcacgtctagcacac  
1-8tRNA-Lys(ctt)[65355,65430]

gccgcgtagctcagttggtagagctgctgactcttaatcagtaggtcgg  
gggttcgactccctcacgcgtacca  
1-9tRNA-Ser(tga)[65432,65521]  
ggagagtaatgcagcgggggtggcccgcgaccggccttgaaagccgggta  
gccgttatggagcttggggttcgatccctctgctctccgc  
1-10tRNA-Cys(gca)[66615,66686]  
gccgttgtccgagtggttagtgccaggctgcaaacctggttagtcgc  
gttcgattcgcggggacggctc  
1-11tRNA-Asn(gtt)[67008,67081]  
tcctccgtagctcaattggcagagcgcgcgactgtaatcgctggttgg  
tgggtcaggtccacccgttgagc  
1-12tRNA-Lys(ttt)c[67275,67349]  
gcccctatagctcagttggtagagcaggagacttttaatcttcgggtcct  
aggttcgatccctagtgggggcacc

>MF919520.1 *Gordonia* phage Lozinak, complete genome

1-2tRNA-Trp(cca)[6303,6376]  
acggacgtagctcaactggtagagcagcggtctccaaaaccgcaggttgc  
aggttcaagtctctgccggccgtgc  
1-3tRNA-Tyr(gta)[6442,6524]  
gtgggtgacacaccaatggtggtgtagcgggctgtaacccgtggcggtc  
tacgcgggcaggttcgatccctgccaccacac  
1-4tRNA-Ser(cga)[6692,6775]  
ggagggatgcccatggtgggcacgcggtgcgaataccgtataggtta  
gccattccgggagttcgattcttctaccctccgc  
1-5tRNA-Ser(gct)[6856,6939]  
ggcgagttatccagctctgggactgggccccgttgctagcggacgcgcatac  
cctgggtgtgaggttcgattcctcagctcggcgc  
1-6tRNA-Asn(gtt)[7382,7457]  
tcgggtgtagctcaatcggcagagcgtcggctgtaaccgagaggttga  
aggttcgacccttccaccggagcca  
1-7tRNA-Lys(ctt)[8009,8084]  
gcctctgtagctcagttggttagagaaccgcctttaagcggtggtgc  
gcaggttcgaatccttcgggggcac

>MF919504.1 *Mycobacterium* phage DmpstrDiver, complete genome

1-1tRNA-Gly(tcc)[93735,93807]  
gcgcttggtcgaattggaaagactcctggctccaccaggttatgca  
ggttcgagtcctgtcgcgcgctc

>MF919506.1 *Mycobacterium* phage FireRed, complete genome

1-1tRNA-Arg(cct)[63278,63361]  
atggcccgtagctcagtcaggtagagcagccttggcccttcgggcttgg  
ttcgtccccggttcaaatccgggcgggccttgcc  
1-2tRNA-Gly(tcc)[63364,63436]  
gcgcccgtggtcgaattggaaagactcctggcttccaccaggttatgca  
ggttcgagtcctgtcgggcgctc

>MF919512.1 Mycobacterium phage Klein, complete genome  
1-tRNA-Gly(tcc)[93720,93792]  
gcgcttgtggtcagttggaaagactcctggctccacccaggttatgca  
ggttcgagtcctgtcgagcgctc

>MF919525.1 Mycobacterium phage Murica, complete genome  
1-tRNA-Arg(cct)[64538,64621]  
atggcccgtagctcagtcaggtagagcagccttgccccttgcgggcttgg  
ttcgtccccggttcaaatccgggcgggccttgcc  
1-2tRNA-Gly(tcc)[64624,64696]  
gcgcccgtggtcgaattggaaagactcctggctccacccaggttatgca  
ggttcgagtcctgtcgggcgctc

>MF919529.1 Mycobacterium phage Sassay, complete genome  
1-tRNA-Arg(cct)[61161,61244]  
atggcccgtagctcagtcaggtagagcagccttgccccttgcgggcttgg  
ttcgtccccggttcaaatccgggcgggccttgcc  
1-2tRNA-Gly(tcc)[61247,61319]  
gcgcccgtggtcgaattggaaagactcctggctccacccaggttatgca  
ggttcgagtcctgtcgggcgctc

>MF919535.1 Mycobacterium phage Terminus, complete genome  
1-tRNA-Arg(cct)[63835,63918]  
atggcccgtagctcagtcaggtagagcagccttgccccttgcgggcttgg  
ttcgtccccggttcaaatccgggcgggccttgcc  
1-2tRNA-Gly(tcc)[63921,63993]  
gcgcccgtggtcgaattggaaagactcctggctccacccaggttatgca  
ggttcgagtcctgtcgggcgctc

>MF919536.1 Mycobacterium phage TipsytheTRex, complete genome  
1-tRNA-Trp(cca)[4183,4256]  
gtacacgtagctcaatcggtagagcagcggctccaaagccgccggttcc  
aggttcgactcctggcgttatgc

>MF919538.1 Mycobacterium phage Updawg, complete genome  
1-tRNA-Gln(ctg)[4930,5004]  
tccccgttcgtctaagcggcaagacaccgggttctgccccggcaatcga  
ggttcgagtccttgatggggagcca

>MF919540.1 Mycobacterium phage Willez, complete genome  
1-tRNA-Arg(cct)[61161,61244]  
atggcccgtagctcagtcaggtagagcagccttgccccttgcgggcttgg  
ttcgtccccggttcaaatccgggcgggccttgcc  
1-2tRNA-Gly(tcc)[61247,61319]  
gcgcccgtggtcgaattggaaagactcctggctccacccaggttatgca  
ggttcgagtcctgtcgggcgctc

>MF919541.1 Mycobacterium phage YassJohnny, complete genome  
1-tRNA-Arg(cct)[61182,61265]  
atggcccgtagctcagtcaggtagagcagccttgccccttgcgggcttgg  
ttcgtccccggttcaaatccgggcgggccttgcc



1-2tRNA-Gly(tcc)[61268,61340]  
gcgcccgtggcgaattggaaagactcctggctccacccaggttatgca  
ggttcgagtcctgtcgggcgctc

>KT825490.1 Escherichia phage C119, complete genome  
1-1tRNA-Arg(cct)[42465,42540]  
gttctgtggcgtaacaggataacgcagagacctcctaagtctcagttac  
tggttcgagtcagtcggaacacca

>KC661272.1 Mycobacterium phage Methuselah, complete genome  
1-1tRNA-Asn(gtt)[3921,3996]  
tgatctgtagctcaatcggcagagcaccggctgtaaccgggacgttgg  
aggttcgagtcctccagatcagcca  
1-2tRNA-Trp(cca)[4037,4111]  
aggcacgtagctcaattggtcagagcagcggctcctcaaagccgcccgtg  
caggttcgagtcctgccgtgtctgc  
1-3tRNA-Leu(cag)[4146,4220]  
ggctcggtaggcaaacaggcaaagccgcctgtctcaggaacaggtgcgtg  
agggttcgactccctcccgagctac

>KF188414.1 Mycobacterium phage ABCat, complete genome  
1-1tRNA-Arg(cct)[63183,63266]  
atggcccgtagctcagtcaggtagagcagccttgccttcgggcttgg  
ttcgtcccggttcaaaccggcgccgttgc  
1-2tRNA-Gly(tcc)[63269,63341]  
gcgcccgtggcgaattggaaagactcctggctccacccaggttatgca  
ggttcgagtcctgtcgggcgctc

>KT359365.1 Mycobacterium phage DaHudson, complete genome  
1-1tRNA-Asn(gtt)[3832,3907]  
tgatctgtagctcaatcggcagagcaccggctgtaaccgggacgttgg  
aggttcgagtcctccagatcagcca  
1-2tRNA-Trp(cca)[3948,4022]  
aggcacgtagctcaattggtcagagcagcggctcctcaaagccgcccgtg  
caggttcgagtcctgccgtgtctgc  
1-3tRNA-Leu(cag)[4057,4131]  
ggctcggtaggcaaacaggcaaagccgcctgtctcaggaacaggtgcgtg  
agggttcgactccctcccgagctac

>KT375356.1 Rhodococcus phage Rhodalysa, complete genome  
1-1tRNA-Asn(gtt)[1503,1576]  
tcacgtatagctcaatcggcagagcaacgcactgttaaggcgggggtga  
aggttcgagtccttctacgtgagc  
1-3tRNA-Trp(cca)[1702,1776]  
gggcacgtagctcaattggatagagcccggtctcctcaaagccggtggtg  
ggggttcgagtcctccgggcctgc

>KT381277.1 Mycobacterium phage Wooldri, complete genome  
1-1tRNA-Asn(gtt)[3751,3826]  
tgatctgtagctcaatcggcagagcaccggctgtaaccgggacgttgg

aggttcgagtcctcccagatcagcca  
 1–2tRNA–Trp(cca)[3867,3941]  
 aggcacgtagctcaattggtcagagcagcggctcctccaaagccgccggctg  
 caggttcgagtcctgccgtgtctgc  
 1–3tRNA–Leu(cag)[3976,4050]  
 ggctcggtaggcaaacaggcaaagccgcctgtctcaggaacaggtgcgtg  
 agggttcgactccctcccagctac  
 >KT59213.1 Rhodococcus phage TWAMP, complete genome  
 1–1tRNA–Asn(gtt)[1503,1576]  
 tcacgtatagctcaatcggcagagcaacgcactgttaaggcgggggttga  
 aggttcgagtccttctacgtgagc  
 1–3tRNA–Trp(cca)[1702,1776]  
 gggcacgtagctcaattggatagagccccggctcctccaaagccggtggtg  
 ggggttcgagtcctccgggcctgc  
 >KT990218.1 Rhodococcus phage Lillie, complete genome  
 1–1tRNA–Asn(gtt)[1503,1576]  
 tcacgtatagctcaatcggcagagcaacgcactgttaaggcgggggttga  
 aggttcgagtccttctacgtgagc  
 1–3tRNA–Trp(cca)[1702,1776]  
 gggcacgtagctcaattggatagagccccggctcctccaaagccggtggtg  
 ggggttcgagtcctccgggcctgc  
 >KU695582.1 Mycobacterium phage McFly, complete genome  
 1–1tRNA–Asn(gtt)[5402,5474]  
 tgacgttagctcaatggcagagcaccggctgttaaccggacggttgaa  
 ggttcgagtccttccatgtcagc  
 1–2tRNA–Trp(cca)[5479,5552]  
 gcgctcctagctcaattggtagagcagcggctcctccaaagccgcgagttcc  
 aggttcgagtcctggggagcgtgc  
 1–3tRNA–Gln(ctg)[5594,5666]  
 tccctgttcttaacggtaagacaccgggctctggaccggcaatcga  
 ggttcgagtccttgatggggagc  
 >KU865303.1 Mycobacterium phage TeardropMSU, complete genome  
 1–1tRNA–Arg(cct)[61937,62020]  
 atggcccgtagctcagtcaggtagagcagccttgccttgcgggcttgg  
 ttcgtccccgggtcaaatccggcgggccttgcc  
 1–2tRNA–Gly(tcc)[62023,62095]  
 gcgcccgtggtcgaattggaaagactcctggcttccaccaggttatgca  
 ggttcgagtcctgtcgggcgctc  
 >KU935726.1 Mycobacterium phage Xerxes, complete genome  
 1–1tRNA–Thr(ggt)[28768,28845]  
 gatcctacggacgggaaaggacgtactacggctgtgtaatccgcaggtc  
 gctgggtcgagcccagctgggggcacca  
 >KU935730.1 Mycobacterium phage Pipsqueaks, complete genome  
 1–1tRNA–Thr(ggt)[28748,28825]

gatcctacggacgggaaaggacgtactacggtctggtaatccgcaggtc  
 gctggttcgagcccagctggggcacca  
 >KU985096.1 Mycobacterium phage Kazan, complete genome  
 1–1tRNA–Asn(gtt)[5408,5480]  
 tgacgtgtagctcaatggcagagcaccggctgtaaccggacggtgaa  
 ggttcgagtcctccatgtcagc  
 1–2tRNA–Trp(cca)[5485,5558]  
 gcgctcctagctcaattggtagacagcggctctcaaagccgcgagttcc  
 aggttcgagtcctggggagcgtgc  
 1–3tRNA–Gln(ctg)[5600,5672]  
 tccctgttcgtctaatacggttaagacaccgggctctggacccggcaatcga  
 ggttcgagtccttgatggggagc  
 >KU998254.1 Gordonia phage Kampe, complete genome  
 1–2tRNA–Leu(taa)c[70491,70577]  
 gccctgtggcgaaattcggaatacgcgggagacttaaaatcttctagcc  
 ttatggctttatcggttcaagtcgggtcaggggtac  
 >KU998252.1 Gordonia phage PatrickStar, complete genome  
 1–2tRNA–Leu(taa)c[70491,70577]  
 gccctgtggcgaaattcggaatacgcgggagacttaaaatcttctagcc  
 ttatggctttatcggttcaagtcgggtcaggggtac  
 >KX523125.1 Mycobacterium phage BuzzBuzz, complete genome  
 1–1tRNA–Asn(gtt)[3922,3997]  
 tgatctgtagctcaatcggcagagcaccggctgtaaccgggacgttg  
 aggttcgagtcctccagatcagcca  
 1–2tRNA–Trp(cca)[4038,4112]  
 aggcacgtagctcaattggtcagagcagcggctctcaaagccgcggctg  
 caggttcgagtcctgccgtgtctgc  
 1–3tRNA–Leu(cag)[4147,4221]  
 ggctcggtaggcaaacaggcaaagccgcctgtctcaggaacaggtgcgtg  
 aggttcgactccctcccagctac  
 >GQ478082.1 Enterococcus phage phiFL1B, complete genome  
 1–1tRNA–Asn(gtt)[14841,14913]  
 tggaatatagctcagttggtagagctacgactgttaatcgtagggtcat  
 ggttcgagtcctcgttattccag  
 1–2tRNA–Met(cat)[38073,38146]  
 ggaccattagctcagttggttagagccaaccgctcataacggttaggtca  
 taggttcgagtcctgtatggcca  
 >GQ478083.1 Enterococcus phage phiFL1C, complete genome  
 1–1tRNA–Asn(gtt)[14575,14647]  
 tggaatatagctcagttggtagagctacgactgttaatcgtagggtcat  
 ggttcgagtcctcgttattccag  
 1–2tRNA–Met(cat)[37804,37877]  
 ggaccattagctcagttggttagagccaaccgctcataacggttaggtca  
 taggttcgagtcctgtatggcca

>KR063281.1 *Gordonia* phage GMA2, complete genome  
2-1tRNA-Arg(tct)c[57692,57765]  
gccctcatggtctaaaggataaggcacatgtcttctaaacatgacgatgt  
cgggttcgagtcggctgagggcac  
2-2tRNA-Thr(tgt)c[57883,57955]  
gccccattagcatattggcagatgcaccgctcttgtaaagcggatacagg  
agttcgattctcctatgggctc  
2-3tRNA-Glu(ttc)c[58076,58153]  
gccggagttgctctgctggtaggggcaactggattttcactccagtaag  
acgcgggttcgattcccgtctccgtac  
2-4tRNA-Ser(gct)c[58157,58240]  
ggtgagttatcttgactgggtcaaggctccgttgctagcgaagcgcgtc  
ttagggcgtggcgttcgattcgtcaactcaccgc  
2-5tRNA-Ser(tga)c[58319,58403]  
ggagagtatgctactggtgtagcaagcgtcttgaaaaccgctatacgggt  
atccattccgggggttcgactcctctactctccgc  
2-6tRNA-Lys(ctt)c[58406,58478]  
gctcctatagctcagcggtagagctcggactcttaatccglaggtccta  
ggttcaaactcctagtgaggacac  
2-7tRNA-Lys(ttt)c[58481,58552]  
gggtctctcgtataacggcattaccgctggcttttaccagcagaacagg  
gttcgactccctggggacccac  
2-8tRNA-Glu(ctc)c[58733,58806]  
gccgcattggagtaacggttatctcatctgattctcaatcagaagactac  
gggttcgattcccgtatgcggtac  
2-9tRNA-Leu(tag)c[58894,58978]  
gccccattggcgaattggcagacgcgctagatttaggatctagtgtcct  
ttagggcgtgaggggttcgagtccttgggggtac  
2-10tRNA-Asp(gtc)c[58993,59068]  
gccgatatagaggagctcgagtcctcgccaccctgtcacggtggagatc  
acgggttcaaataccggttattggcgc  
2-11tRNA-Tyr(gta)c[59077,59160]  
ggggagtaggcaactgttggttggtgcggctggctgtaaaccagttctg  
agaggctcgggggttcgattccctcactccac  
2-12tRNA-Pro(tgg)c[59301,59375]  
cgggatgtagttcaactggtagagcacttgcttgggtgcaagatgttg  
caggttcaaatcctgtcatcccgac  
2-13tRNA-Ile(gat)c[59483,59557]  
cggctcttagctcagttggttagagcatcgccctgataaggcgaaggtcc  
gaggttcaaatcctcgaagatcgac  
2-14tRNA-Met(cat)c[59632,59706]  
agcgcgtagagcagtttggtagctcaggagttcataaacttcaggtca  
cgggttcaaatcccggttcgcgccac  
2-15tRNA-Asn(gtt)c[59744,59816]

tacccggtagctcaatggcagagcgctagactgttaatctggtggtgaa  
ggttcgagtccttctcgggtagc

2-16tRNA-Gln(ttg)c[59821,59895]

tgcccgctagcacaattggtagttgcgccgcgttggtcgcggatgttc  
caggttcgagtcctgggtgggcagc

2-17tRNA-Trp(cca)c[60083,60154]

atggacgtagttcaatggtagaacatcggtctccaaaccgagtacgtgg  
gttcgattcctaccgtccgtgc

>KY629563.1 *Sphingobium* phage Lacusarx, complete genome

3-1tRNA-Pro(cgg)[66918,66995]

ctgggtgtagcgcagtcgggttagcgtgtgcggttcggagccgtgaggtc  
gtaggttcaaactctaccatccagacca

3-2tRNA-Val(tac)[67270,67344]

tggggattagctcagcggtagagcagccgtttacatgcggccggtcggc  
ggttcgatcccgatccctaacca

3-3tRNA-Val(gac)[67347,67421]

gcctcgttagctcagcggtagagcgtgctatgacatggcagatgacggt  
ggtcaaaccatcacgaggcacca

3-4tRNA-Ala(tgc)[67694,67768]

ggggatgtagctcagaggtagagcaccggtttgcaagcggaagcgcgtc  
ggttcgactccgacctcaccacca

3-5tRNA-Asn(gtt)[67903,67984]

ttggtagtgacagagtggtaatgtccccggctgttaaccggtgacccgaa  
aggcgggtggttcgatcccaccctaccgaacca

3-6tRNA-Ile(gat)[67986,68062]

agcgggttagctcagcccggtagagcaaccgaccgataatcggtgtgtcg  
caggttcaaactctgccatcgctacca

3-7tRNA-Lys(ctt)[68807,68882]

ggatcggtagctcagtaggtagagcaggggattcttactccaaggtgga  
cgggttcaagcccgtctcgatcctcca

3-8tRNA-Lys(ttt)[68955,69030]

gggccggtagctcagtaggcagagcagggggcttttaacctcaagtggt  
cgggttcaagcccgaccggctacca

3-9tRNA-Gly(gcc)[69039,69113]

gcaggcgtcgttcagacggtaggacacctccttgccatggaggagacgcg  
ggttcgagaccgcccgcctcca

3-10tRNA-Asp(gtc)[69126,69202]

ggttctgtagcttagctgggtgaaagcgcgggtgtcaactcggagatcg  
cgggttcaagtccgtcagaaccgcca

3-11tRNA-Glu(ctc)[69204,69278]

ggggcggtcgtctagcggacaggacgtggcttctcaagccggaagcagg  
ggttcgattcccctacgcctacca

3-12tRNA-Glu(ttc)[69287,69362]

agcgcctatcgtctagcagcaggacacgttggtttcaccttcggacgc

gggtttgaatcccgttggcgctcca  
 3-13tRNA-Gly(tcc)[69389,69463]  
 gcgacattagctcagcggtagagcgcggtttccagtcgcgcgtcagg  
 agttcgatcctcctatgtcgctcca  
 3-14tRNA-Arg(acg)[69473,69548]  
 ggcccggaagcacaaactggacgtgcgctccgctacgaacggaaaggttgt  
 gggttcgagtccacgcgggcctcca  
 3-15tRNA-Phe(gaa)[69554,69628]  
 ggtgaggtagctcagaggtagagcgcggttgaaaagccggcgctcgg  
 gttcgatcccgctctcaccacca  
 3-16tRNA-Ser(cga)[70140,70228]  
 ggagggtggctgcaagaggtgcgtaaccggtctcgaaaaccgggctgggg  
 ttaggagccctacgggttcgatccctgcaccctccgcca  
 3-17tRNA-Leu(cag)[70382,70466]  
 ggcccgctggtgaaatgtagacgcactcgctcagaagcgagcgaccgag  
 aggtcatcccggttcaaaccggggcgggccacca  
 3-18tRNA-Leu(gag)[70472,70556]  
 ggggatgtggtgaaataggtaaacgcagcggtcgagagcccgccgctg  
 atggcttgagggttaagtcctccatccccacca  
 3-19tRNA-Thr(cgt)[70588,70661]  
 gcccggttagctcaatgtagagctacccgtcgtaacgcgaggacgagg  
 gttcgattcctcaccgggctcca  
 3-20tRNA-His(gtg)[70676,70751]  
 gtgaccgaggcagagttggatcatgtccgggtcgtgatcccgatacgg  
 cgggttcgagcccccgccgtcacccc  
 3-21tRNA-Gln(ctg)[70770,70843]  
 ttcccgctcgttcaatggtaggacgccggctctgaaccgggagatcgag  
 gttcgagtccttgacggggaacca  
 3-22tRNA-Ser(gct)[70859,70945]  
 ggagagttgccagagcggtaatggcgtggcttgctaagccaagacaacgt  
 cacggttcgaggggttcgatccctcactctcctcca  
 3-23tRNA-Cys(gca)[70954,71027]  
 gccgccttggccgagtggaaggctccgattgcaaccccgcatctccc  
 gttcgatccgggaaggcggtcca  
 3-24tRNA-Trp(cca)[71032,71107]  
 atctcaaagcattaagggcgatgcaccggtctccaaaaccggcaagct  
 gggttcgagtcttagtgaggtgcca

>KT870145.1 Roseobacter phage DSS3P8, complete genome

4-1tRNA-Glu(ttc)[6433,6509]  
 gccgcatgggacttcttggcgaaggtcgctgccctttcaaggcggagaag  
 cgggttcgaaacccgcatcggcacca  
 4-2tRNA-Glu(ctc)[6542,6618]  
 ggagcattggacttcttgggaaggtcgccggttctcaacgcggagaag  
 cgggttcgaaacccgcatgctctacca

4-3tRNA-Met(cat)[7058,7132]  
ggcgacgtagctcagaggtagagcgcttggctcataaccgagtggtcgg  
ggttcgatcccacccgtcgccacca  
4-4tRNA-Pro(tgg)[7206,7281]  
cagggtgtagctcagtaggtagagtcgggacttgaatccggaggccgt  
cggttcgagaccgaccacctgacca  
4-5tRNA-Met(cat)[7712,7787]  
tgcgggatagagcagaggtcagctcgccatcctcataagtgaggctgt  
cggttcgaatccggctcccgaacca  
4-6tRNA-Tyr(gta)[11149,11235]  
gggagggttcagccacaggtcgtgtaggtgggttgaacccactccgg  
gttccgggcgagttcgattctgcactctccacca  
4-7tRNA-Ala(cgc)[11429,11515]  
tggcgagtggcgaaatggtaaacgtacgggtcgctacccggagcagggt  
gtccctgttggtggttaagtccacctcgccgacca  
4-8tRNA-Val(tac)[13913,13988]  
gcccggtagctcagcggtagagcttcgcctttacacggcgagtaagcgg  
cggttcgalcccgcactgggtacca  
4-9tRNA-Val(gac)[14102,14176]  
ggtcccttagctcagcggtagagcgtctggtcgacatccagaagtcact  
ggttcaatcccagtagggtccacca  
4-10tRNA-Ala(tgc)[14314,14389]  
gggctgttagctcatctgggagagcgcttccttgcaagcaggaggtggc  
gagttcgagactcgacggtccacca  
4-11tRNA-Ala(tgc)[14399,14472]  
ggggcacgtacatgggtgtcgggcgaccttgcaagattgctgtctcggg  
gttcgattccccggtgctccacca  
4-12tRNA-Lys(ctt)[15211,15298]  
gcgccggtgctccgagtggtgacgatgggtcggactcttaatccgaatgcg  
aaagcacaccgtgggttcgaatcccacccggcacacca  
4-13tRNA-Asn(gtt)[15304,15381]  
tggcatgtagtcttcgggtgaaggcgtcggctgttaaccgagattgag  
gctggttcgagtcagccgtgccagcca  
4-14tRNA-Cys(gca)[15385,15458]  
gacgatagagccgggtggttaggccgggattgcaaatcctcttaggtga  
gttcgattctcactgtcgtcca  
4-15tRNA-His(gtg)[15464,15539]  
gctgactaagtgttgatggatacacgtctggtgtggaccagaaatagcg  
aggttcgatacctgcagtcagttcca  
4-16tRNA-Asp(gtc)[15544,15617]  
ggcctattgccgtcaggaaggctacccgctgtctacgggtaagacgg  
gttcgagtcggtataggtcgcca  
4-17tRNA-Gly(tcc)[16689,16762]  
gcggatgtagccaagtggtaaggcagcaggcttcaccctgccatcgtgg

gttcgatcccatcatccgctcca  
 4-18tRNA-Gln(ctg)[16805,16878]  
 tgcccatcgtctagcggtaggacgcctgtctctgaaacaggaaagcgcg  
 gttcgaatcctcgtggggcatcca  
 4-19tRNA-Gly(gcc)[16969,17043]  
 gcaggtatagctcagcggagagcatctggttgccaatcagaaggccgtg  
 ggttcgacccccactacctgctcca  
 4-20tRNA-Ile(gat)[17144,17218]  
 ggtcctgtggcgtaaatggaacgtacgtgcctgattagcgggggtaga  
 ggttcgatccctctcgggactacca  
 4-21tRNA-Leu(cag)[17226,17310]  
 gcggatgtggcgaaatggtagacgcgctgtcttcagaaggcagtgctcta  
 gtggcgtgaggggtcaaaccctccatccgcacca  
 4-22tRNA-Phe(gaa)[17381,17456]  
 gtgtctgtagtgaggctggtgctcacgctggttgaaaagccagagacgg  
 aggtcgtatccctcccgacacacca  
 4-23tRNA-Leu(gag)[17462,17545]  
 gcccatgtggtgaaaaggtagacacgcagctcttgagagggtgtgccgca  
 aggtgtgctggtcaaaccagtcattgggcacca  
 4-24tRNA-Thr(tgt)[17554,17629]  
 gccgtcatagctcagttggaagagcgtcgcttgaagcgagatgtcgc  
 ggttcgattctgtggcgacacca  
 4-25tRNA-Leu(caa)[17638,17713]  
 gcgggaatgggcaaatggtaaagtcggcccttcaaacgggggagcctga  
 ggttcgagtcctcttcccgtagca  
 4-26tRNA-Lys(ctt)[17991,18065]  
 gcaccggtagctcagaggcagagcggcaggcccttaacctgcgcgacggg  
 attcgaattccccggtacacca  
 4-27tRNA-Thr(ggt)[18147,18221]  
 gctgccatagctcagtaggtagagcatgcccttggtacgggtaagacaca  
 ggttcgagacctgtggcagcacca  
 4-28tRNA-Arg(tct)[20440,20515]  
 ctgctcgtagctcagaggacagagcgtggggcttctaccccagcggcga  
 ggttcgaatccttccgggcaggcca  
 4-29tRNA-Thr(cgt)[20632,20707]  
 gctgatgtagctcagtaggcagagcgtcgctcgttaagcgagaggtcgt  
 cggttcgaaaccgacctcagcacca  
 4-30tRNA-Pro(ggg)[20712,20786]  
 caggatgtagctcaggggtagagtcttggtcgggaaccaagaggccg  
 ggtcaatccccgccatcctgacca  
 4-31tRNA-Phe(gaa)[55152,55227]  
 gcccgatagctcagttggtagacacagcactgaaaatcgtggtgtcgg  
 cggttcgaccccgtctccggcacca

>KX925554.1 Streptomyces phage BRock, complete genome



5-1tRNA-Tyr(gta)c[95476,95558]  
gcgtgtgaacccgtaattggtagcggcgccgtgtaaagccgttgctt  
cggctctgggggttcaagtcctccgcacgcac  
5-2tRNA-His(gtg)c[95711,95784]  
gggtcggtagctcaattggtagagcgcgcgttggtcgcggtggttc  
gggttcgaatcccgcccttcctc  
5-3tRNA-Ile(gat)c[96139,96222]  
cggcgcgtatccaagtctggttaaggagccggtctgataaacggtgcgg  
aaacgtacgtaggttcaatcctaccgcgtcgac  
5-4tRNA-Ser(gga)c[96433,96518]  
ggaaggtaaagcaatttggttagcagcttgattggaatcaagtacgactc  
tcaaggtctaacgggttcgattcccgtacctccgc  
5-5tRNA-Ser(gct)c[96606,96695]  
ggagatgtggctgagtcgggttaaggcgctcgactgctaatacgagtggg  
tgtaaaagccccgcaggttcaatcctgtcatctccgcca  
5-6tRNA-Arg(tcg)c[96956,97037]  
gcggtactagccgagatccatgaggcatttgagttccctgcaaagcga  
atggcatacggttcgattccgtagtatcgctc  
5-7tRNA-Val(tac)c[97297,97369]  
gccggtatagctcagtgaggagcgtcactcttacaagtgagggtcggg  
ggttcgaatccctctgccgtac  
5-8tRNA-Arg(tct)c[97773,97846]  
gcctccgtagctcagtggaagagcagcagccttctaagtcgacggtcgc  
aggttcgaatcctgccgggggtac  
5-9tRNA-Arg(acg)c[98530,98602]  
gcgctcgtggtgtaatggacagcacaacagtctacggaactgtagaggg  
ggttcgaatccctccggcggtac  
5-10tRNA-Lys(ttt)c[101007,101080]  
gattccttagctcagttggcagagcagtgggcttttaacccaacggtcgt  
cgggtcagagcccgacaggaatcac  
5-11tRNA-Lys(ctt)c[101248,101321]  
gctccgttagctcagttggttagagcggcgccctttaagccgatggtcgg  
gggttcaagtcctcacggagcac  
5-12tRNA-Ala(tgc)c[101394,101467]  
gggcccatagctccaacggtagagcaacacccttgcaaggtgaaggttgt  
cgggttcgaatccgactgggtccac  
5-13tRNA-Asn(gtt)c[103903,103975]  
tctccttagctcaatggcagagcagacggctgtaaccgtcaggttgtt  
ggttcgagtcagccgggagagc  
5-14tRNA-Trp(cca)c[104182,104253]  
aggttggtgatgtagtgtaacatgatggtctccaaaaccattctcaggg  
gttcgaatcctctacagcctgc  
5-15tRNA-Leu(tag)c[104257,104342]  
gccggtgtggcggaatttaggcagacgcgggggttaggttcccgtgc

ctagtggcgtgcaggttcaagtcctgtcaccggtac  
 5–16tRNA–Leu(caa)c[104356,104438]  
 gcccaacttggcgtaatggcagccgcgccgattcaagtcgccgtgtccta  
 gtgacgtgtcagttcgagtctgacagtgggtac  
 5–17tRNA–Thr(ggt)c[104606,104681]  
 gccgacttaactcagcaggtagagtactgtcttggttaagacagaagtcac  
 gggttcgagtcccgtagtcggctcca  
 5–18tRNA–Thr(cgt)c[104781,104852]  
 gccctactagtccaatggtagaatgactccttcgtacggagtaggtggg  
 gttcgattcctcagtggggctc  
 5–19tRNA–Thr(tgt)c[104889,104962]  
 gccctatagctcagtggtagagcaatcgccttgaagcgataggtcgtg  
 ggttcaaatcctactgggggctcc  
 5–20tRNA–Glu(ttc)c[105390,105463]  
 gtccccgtagttagcggccaagcacgctggactttcaattcggtagcgc  
 ggggtcgaatcccgctgggggtac  
 5–21tRNA–Glu(ctc)c[105631,105704]  
 gtcccatagtgtagtttggtagcacgacagcctctcaagctgtagcac  
 gggttcaaatccggtgggggtac  
 5–22tRNA–Asp(gtc)c[105866,105939]  
 ggacctgtagtgtatgggagtagcacgggtaccctgtcaaggtgcaagggc  
 gggttcgaatcccgctcaggtccgc  
 5–23tRNA–Gln(ttg)c[105988,106061]  
 tgggatatggggtaattggcagcccgctgactttggatcaggacagtct  
 aggttcgagtcctagtgtcccagc  
 5–24tRNA–Gln(ctg)c[106315,106386]  
 tccccgggtggtgtaatggcagcacaacgggtctctggaaccgttggtcttg  
 gttcgagtcaggctggggagc  
 5–25tRNA–Gly(tcc)c[106484,106557]  
 gcggtattagtggtcaatggcagcacgtcagtcctccaaactgaaagtag  
 gggttcgaatcccctatgccgttc  
 5–26tRNA–Met(cat)c[106776,106859]  
 tgcagggtagagaagttcgggtcatctcgctagcctcataagctagaaatc  
 gccttaagtgggtcaaatccccccctgtccca  
 5–27tRNA–Met(cat)c[106861,106935]  
 ggctgtgtagctcaattagcagagcaccgactcataatcgggcgggtcg  
 atggttcaatccatccacagccac  
 5–28tRNA–Phe(gaa)c[107014,107086]  
 gccctctagctgagatggattagcgtagcctgaaaagcttgagaggtc  
 ggttcgataccggcggggggcac  
 5–29tRNA–Pro(tgg)c[107164,107238]  
 ccggatatcgtctagtttggttaaggcgcctgcttgggagcaggatatcg  
 ggagttcaatctctctatccggac

\*Virgaviridae

>L07937.1 Soil-borne wheat mosaic virus (SBWMV) complete RNA  
2-tRNA-Val(cac)[3505,3575]  
gatgaggtgcgactggtggcgcggctgctatcacacagcagctaggagg  
ggttcaattcccccccatcc
