# Supplementary material for: Global In-Silico Scenario of tRNA Genes and Their Organization in Virus Genomes
Source: MDPI journal article supplement (doi:10.3390/v11020180), 2019-02-21
Supplement: s1 [file s1]

|    |                                       |              |             |              |
|----|---------------------------------------|--------------|-------------|--------------|
| G1 | Citrobacter phage Michonne            | PEMN-----D   | KMIRSLKAGT  | VLRLQHFSC    |
|    | Citrobacter phage Mijalis             | PEMN-----D   | KMIRSLKAGT  | VLRLQHFSC    |
|    | Citrobacter phage Moogole             | PEMN-----D   | KMIRSLKAGT  | VLRLQHFSC    |
|    | Shigella phage Sfl3                   | PEMN-----D   | KMIRSLKAGT  | VLRLQHFSC    |
|    | Citrobacter phage Mordin              | PEMN-----D   | KMIRSLKAGT  | VLRLQHFSC    |
|    | Escherichia phage SUSP1               | PEMN-----D   | KMIRSLKAGT  | VLRLQHFSC    |
|    | Escherichia phage SUSP2               | PEMN-----D   | KMIRSLKAGT  | VLRLQHFSC    |
|    | Shigella phage Sfl6                   | PEMN-----D   | KMIRSLKAGT  | VLRLQHFSC    |
|    | Shigella phage Sfl8                   | PEMN-----D   | KMIRSLKAGT  | VLRLQHFSC    |
|    | Escherichia coli O157 typing phage_1  | PEMNY-----D  | KMIRSLKAGT  | VLRLQHFSC    |
|    | Escherichia phage JH2                 | PEMNY-----D  | KMIRSLKAGT  | VLRLQHFSC    |
|    | Shigella phage Sfl5                   | PEMNY-----D  | KMIRSLKAGT  | VLRLQHFSC    |
|    | Enterobacteria phage WV8              | PEMNY-----D  | KMIWSLKAGT  | VLRLQHFSC    |
|    | Escherichia coli O157 typing phage_11 | PEMNY-----D  | KMIWSLKAGT  | VLRLQHFSC    |
|    | Bacteriophage Felix_01                | PEMNY-----D  | KMT--SLKAGT | VLRLQHFSC    |
|    | Escherichia phage EC6                 | PEMNY-----D  | KMT--SLKAGT | VLRLQHFSC    |
|    | Escherichia phage vB EcoM_AY0145A     | PEMNY-----D  | KMT--SLKAGT | VLRLQHFSC    |
|    | Salmonella phage BPS15Q2              | PEMNY-----D  | KMT--SLKAGT | VLRLQHFSC    |
|    | Salmonella phage FO1a                 | PEMNY-----D  | KMT--SLKAGT | VLRLQHFSC    |
|    | Salmonella phage Mushroom             | PEMNY-----D  | KMT--SLKAGT | VLRLQHFSC    |
|    | Escherichia phage vB EcoM_Alf5        | PEMNY-----D  | KMT--SLKAGT | VLRLQHFSC    |
|    | Salmonella phage ST11                 | PEMNY-----D  | KMT--SLKAGT | VLRLQHFSC    |
|    | Escherichia phage vB EcoM-VpaE1       | PEMNY-----D  | KMIRSLKAGT  | VLRLQHFSC    |
|    | Escherichia phage HY02                | PEMNY-----D  | KMIRSLKAGT  | VLRLQHFSC    |
|    | Salmonella phage vB SPuM SP116        | PEMNY-----D  | KMIRSLKAGT  | VLRLQHFSC    |
|    | Staphylococcus phage SA1              | -----Y--D    | KMIRSLKAGT  | VLRLQHFSC    |
|    | Enterobacteriophage UAB_Phi87         | PEMNY-----D  | KMIRSLKAGT  | VLRL-----    |
|    | Escherichia coli O157 typing phage_12 | -----D-----  | WLSLKAGT    | VLRLQHFSC    |
|    | Salmonella phage Si3                  | PEMNY-----D  | KMT--SLKAGT | V---LQHFSC   |
|    | Erwinia amylovora phage phiEa104      | PAMNYMDSFK   | KMT--QLRGWT | VLRLHSC----  |
|    | Erwinia phage phiEa21-4               | PAMNYMDSFK   | KMT--QLRGWT | VLRLHSC----  |
|    | Erwinia phage vB EamM-M7              | PAMNYMDSFK   | KMT--QLRGWT | VLRLHSC----  |
| G2 | Caulobacter phage phiCbK              | WGGEDPP--KK  | LLLASSFVII  | VQQTG--      |
|    | Caulobacter phage Ccr32               | WGGEDPP--KK  | LLLASSFVII  | VQQTG--      |
|    | Caulobacter phage Ccr34               | WGGEDPP--KK  | LLLASSFVII  | VQQTG--      |
|    | Caulobacter phage Ccr5                | WGGEDPP--KK  | LLLASSFVII  | VQQTG--      |
|    | Caulobacter phage CcrMagnet           | WGGEDPP--KK  | LLLASSFVII  | VQQTG--      |
|    | Caulobacter phage CcrSwift            | WGGEDPP--KK  | LLLASSFVII  | VQQTG--      |
|    | Caulobacter phage Ccr10               | WGGEDPP--KK  | LLLASSFVII  | VQQTG--      |
|    | Caulobacter phage Ccr29               | WGGEDPP--KK  | LLLASSFVII  | VQQTG--      |
|    | Caulobacter phage Ccr2                | WGGEDPP--KK  | LLLASSFVII  | VQQTG--      |
|    | Caulobacter phage CcrKarma            | WGGEDPP--KK  | LLLASSFVII  | VQQTG--      |
| G3 | Caulobacter phage CcrRogue            | WGGEDPP--KK  | LLL--HAFVII | VQQTG--      |
|    | Caulobacter phage CcrColossus         | WGGEDPP--KK  | LLL--HASVII | VQQTG--      |
|    | Enterobacteria phage_4MG              | -MKTRLRCYI   | -EWG--SSSN  | DHPRALVF--   |
|    | Salmonella phage 41                   | -MKTRLRCYI   | -EWG--SSSN  | DH-----      |
|    | Salmonella phage PVPSE1               | -MKTRLRCYI   | -GEG--SSSN  | D-PRALVFA    |
|    | Salmonella phage SSE121               | ---TILRCYI   | -GEG--SSSN  | D-PRALVFA    |
|    | Cronobacter phage vB_CsaM_GAP31       | -MKTRLRCYI   | GEWG--SSSN  | D-PRALVF--   |
| G4 | Salmonella phage I9                   | -----YI      | -EW--SSSN   | DHP--LFM--   |
|    | Klebsiella phage vB_KpnM_BIS47        | MMKT--LCYI   | -GEQSSISK   | D-PRALVF--   |
|    | Klebsiella phage vB_KpnM_KB57         | MMKT--LCYI   | -EWOHSSSK   | D-PRALVF--   |
|    | Streptomyces phage Jay2Jay            | EEVLLGRAKN   | NRIAKKRMMY  | HFCTTRA      |
|    | Streptomyces phage Peebs              | EEVLLGRAKN   | NRIAKKRMMY  | HFCTTRA      |
|    | Streptomyces phage Samist12           | EEVLLGRAKN   | NRIAKKRMMY  | HFCTTRP      |
|    | Streptomyces phage NootNoot           | EEVLLGRAKN   | NRIAKKRMMY  | HFCTTR--     |
|    | Streptomyces phage Paradiddles        | EEVLLGRAKN   | NRIAKKRMMY  | HFCTTR--     |
| G5 | Streptomyces phage Sushi23            | EEVLLGRAKN   | NRIAKKRMMY  | HFCTTR--     |
|    | Streptomyces phage Warpy              | EEVLLGRAKN   | NRIAKKRMMY  | -FCTTRA      |
|    | Streptomyces phage Mildred21          | EEVLLG-AKN   | NRIAKK--MMY | HFCTT---     |
| G6 | Aeromonas phage phiAS5                | RLLNI--THFME | MYDAGCWR--  | -----PQSSS M |
|    | Aeromonas phage PX29                  | -LLNI-----   | --DAGCWKME  | MYTHFPQSSS - |
|    | Bacteriophage Aeh1                    | -LLNI-----   | --DAGCWKME  | MYTHFPQSSS M |
| G6 | Mycobacterium phage GardenSalsa       | WNR--YQP-FM  | RHCLLKIGVT  | ADE          |
|    | Mycobacterium phage MrMagoo           | WNR--YQP-FM  | RHCLLKIGVT  | ADE          |
|    | Mycobacterium phage GenevaB15         | WNA--YQP-FM  | RHCLLKIGVT  | ADE          |
|    | Mycobacterium phage Rey               | WNSAYQP-FM   | RHCLLKIGVT  | -DE          |
|    | Mycobacterium phage Bongo             | WNR--YQPSEFM | RHCL--KGV   | -DE          |
|    | Mycobacterium phage Bricole           | WNC--YQPSEFM | RHCL--KGV   | -DE          |
|    | Mycobacterium phage PegLeg            | WNC--YQPSEFM | RH--KGV     | -DE          |

|     |                                               |              |             |             |       |
|-----|-----------------------------------------------|--------------|-------------|-------------|-------|
| G7  | Bacteriophage KVP40                           | MPPRLFKKEY   | MSIWNNDOT   | RMGVHCLLS   |       |
|     | Vibrio phage phiGrn1                          | MPPRLFKKEY   | MSIWNNDOT   | RMGVHCLLS   |       |
|     | Vibriophage phipp2                            | MPPRLFKKEY   | MSIWNNDOT   | RMGVHCLLS   |       |
|     | Vibrio phage VH7D                             | MPPRLFKKEY   | MSIW-NDOT   | RMGVHCLLS   |       |
|     | Vibrio phage phiST2                           | MPPRLF-KEY   | MSIW-NDOT   | RMGVHCLLS   |       |
|     | Vibrio phage ValKK3                           | MPPRLFKKEY   | -SIW-NDOT   | RMGVHCLLS   |       |
|     | Vibrio phage ntl                              | MPPRLF-KEY   | MSIWNNDOTA  | RMGVHCLLS   |       |
| G8  | Bacteriophage T5                              | ---SYE-FC    | ND--PMKVAL  | S-SH-QQ-TI  | M     |
|     | Enterobacteria phage_SPC35                    | ---SYE-FC    | NDK-PMKALS  | ---H-QQGTI  | M     |
|     | Salmonella phage SP01                         | ---RSLYE-FC  | NDK-PMKALS  | ---H-QQ-TI  | M     |
|     | Escherichia phage_bV_EcoS_AKFV33              | ---RSLYEWFC  | NDK-PMKVAL  | ---H-QQ-TI  | M     |
|     | Escherichia phage_vB_EcoS_FFH1                | ---SLYEWFC   | ND--PMKVAL  | ---H-QQ-TI  | M     |
|     | Escherichia phage_slur09                      | ---SLYEWFC   | ND--PMK-AL  | ---H-QQ-TI  | M     |
|     | Escherichia phage_OSYS                        | ---SLYE-FC   | ND--PMKVAL  | S---H-QQGTI | M     |
|     | Escherichia phage_phiLLS                      | ---SLYE-FC   | ND--PMKAL-  | ---H-QQGTI  | M     |
|     | Enterobacteria phage_EPS7                     | ---RSMLEYWFC | NDKGPMPKVA  | L-SHR-QQGTI | M     |
|     | Salmonella phage_100268_sal2                  | ---SMLYE-WC  | NDKGPMPKVA  | LSSHR-QQGTI | M     |
|     | Salmonella phage_118970_sal2                  | ---SMLYE-WC  | NDKGPMPKVA  | LSSHR-QQGTI | M     |
|     | Salmonella phage_Stitch                       | ---SMLYE-WC  | NDKGPMPKVA  | LSSHR-QQGTI | M     |
|     | Yersinia phage_phiR201                        | ---RSMLEYWFC | NDK-PMKVAL  | ---HR-QQGTI | M     |
|     |                                               |              |             |             |       |
| G9  | Mycobacteriophage Wildcat                     | WPFMYAVLLG   | GODTKCTIRSH | EEN         |       |
|     | Mycobacterium phage Cosmo                     | WPFMYAVLLG   | GODTKCTIRSH | EEN         |       |
| G10 | Bacillus cereus bacteriophage_vB_BceM_Bc431v3 | SCCGT-DEDI   | RSQHPFYLLI  | -M          |       |
|     | Bacillus phage_ECP82                          | SCNDT-G-E    | RSQHPFYLLI  | -M          |       |
|     | Bacillus phage_PK16                           | SCNDT-G-ES   | RSQHPFYLLI  | -M          |       |
|     | Bacillus virus_BM15                           | SCNGT-D-E    | RSQHPFYLLI  | -M          |       |
|     | Bacillus phage_PBC6                           | SCNGT-D-E    | RSQHPFYLLI  | -M          |       |
|     | Bacillus phage_JBP901                         | SCNGD-ETDI   | RSQHPFYLLI  | -M          |       |
|     | Bacillus phage_Bcp1                           | SCNGD-E-I    | RSQHPFYLLI  | -M          |       |
|     | Bacillus phage_BCP78                          | -CNSG-D-EI   | RSQHPFYLLI  | -M          |       |
|     | Bacillus phage_TsarBomba                      | -CNSGT-D-EI  | RSQHPFYLLI  | -M          |       |
|     | Bacillus phage_BCU4                           | -CNSG-D-TEI  | RSQ-PFYLLI  | -M          |       |
|     | Bacillus phage_Deep Blue                      | -CNSG-D-TE   | RSQHPFYLLI  | WM          |       |
|     |                                               |              |             |             |       |
| G11 | Mycobacteriophage Bxz1                        | PWYOMCEH-A   | FVKE-GTTTG  | DMIRV-----  | RQR-- |
|     | Mycobacterium phage_ArcherS7                  | PWYOMCEH-A   | FVKE-GTTTG  | DMIRV-----  | RQR-- |
|     | Mycobacterium phage_Audrick                   | PWYOMCEH-A   | FVKE-GTTTG  | DMIRV-----  | RQR-- |
|     | Mycobacterium phage_BeanWater                 | PWYOMCEH-A   | FVKE-GTTTG  | DMIRV-----  | RQR-- |
|     | Mycobacterium phage_Breeniome                 | PWYOMCEH-A   | FVKE-GTTTG  | DMIRV-----  | RQR-- |
|     | Mycobacterium phage_Dandelion                 | PWYOMCEH-A   | FVKE-GTTTG  | DMIRV-----  | RQR-- |
|     | Mycobacterium phage_Drazdys                   | PWYOMCEH-A   | FVKE-GTTTG  | DMIRV-----  | RQR-- |
|     | Mycobacterium phage_DTDevon                   | PWYOMCEH-A   | FVKE-GTTTG  | DMIRV-----  | RQR-- |
|     | Mycobacterium phage_Erdmann                   | PWYOMCEH-A   | FVKE-GTTTG  | DMIRV-----  | RQR-- |
|     | Mycobacterium phage_ET08                      | PWYOMCEH-A   | FVKE-GTTTG  | DMIRV-----  | RQR-- |
|     | Mycobacterium phage_Gabriel                   | PWYOMCEH-A   | FVKE-GTTTG  | DMIRV-----  | RQR-- |
|     | Mycobacterium phage_Ghost                     | PWYOMCEH-A   | FVKE-GTTTG  | DMIRV-----  | RQR-- |
|     | Mycobacterium phage_LRRHood                   | PWYOMCEH-A   | FVKE-GTTTG  | DMIRV-----  | RQR-- |
|     | Mycobacterium phage_Lukilu                    | PWYOMCEH-A   | FVKE-GTTTG  | DMIRV-----  | RQR-- |
|     | Mycobacterium phage_Momo                      | PWYOMCEH-A   | FVKE-GTTTG  | DMIRV-----  | RQR-- |
|     | Mycobacterium phage_Pio                       | PWYOMCEH-A   | FVKE-GTTTG  | DMIRV-----  | RQR-- |
|     | Mycobacterium phage_Shrimp                    | PWYOMCEH-A   | FVKE-GTTTG  | DMIRV-----  | RQR-- |
|     | Mycobacterium phage_Tonenili                  | PWYOMCEH-A   | FVKE-GTTTG  | DMIRV-----  | RQR-- |
|     | Mycobacteriophage_Catera                      | PWYOMCEH-A   | FVKE-GTTTG  | DMIRV-----  | RQRK  |
|     | Mycobacterium phage_Littleton                 | PWYOMCEH-A   | FVKE-GTTTG  | DMIRV-----  | RQRK  |
|     | Mycobacterium phage_Nappy                     | PWYOMCEH-A   | FVKE-GTTTG  | DMIRV-----  | RQRK  |
|     | Mycobacterium phage_Rizal                     | PWYOMCEH-A   | FVKE-GTTTG  | DMIRV-----  | RQRK  |
|     | Mycobacterium phage_Wally                     | PWYOMCEH-A   | FVKE-GTTTG  | DMIRV-----  | RQRK  |
|     | Mycobacterium phage_Bigswole                  | PWYOMCEH-A   | FVKEGGTTTG  | DMIRV-----  | RQR-- |
|     | Mycobacterium phage_Cali                      | PWYOMCEH-A   | FVKEGGTTTG  | DMIRV-----  | RQR-- |
|     | Mycobacterium phage_PhoX                      | PWYOMCEH-A   | FVKEGGTTTG  | DMIRV-----  | RQR-- |
|     | Mycobacterium phage_Astraea                   | PW-OMCEH-A   | FVKE-GTTTG  | DMIRV-----  | RQR-- |
|     | Mycobacterium phage_ErnieJ                    | PW-OMCEH-A   | FVKE-GTTTG  | DMIRV-----  | RQR-- |
|     | Mycobacterium phage_Koguma                    | PW-OMCEH-A   | FVKE-GTTTG  | DMIRV-----  | RQR-- |
|     | Mycobacterium phage_LinStu                    | PW-OMCEH-A   | FVKE-GTTTG  | DMIRV-----  | RQR-- |
|     | Mycobacterium phage_ScottMcG                  | PW-OMCEH-A   | FVKE-GTTTG  | DMIRV-----  | RQR-- |
|     | Mycobacterium phage_Sebata                    | PW-OMCEH-A   | FVKE-GTTTG  | DMIRV-----  | RQR-- |
|     | Mycobacterium phage_Spud                      | PW-OMCEH-A   | FVKE-GTTTG  | DMIRV-----  | RQR-- |
|     | Mycobacterium phage_Ava3                      | PW-OMCEH-A   | FVKE-GTTTG  | DMIRV-----  | RQRK  |
|     | Mycobacterium phage_Daffodil                  | PW-OMCEH-A   | FVKE-GTTTG  | DMIRV-----  | RQRK  |
|     | Mycobacterium phage_Gizmo                     | PW-OMCEH-A   | FVKE-GTTTG  | DMIRV-----  | RQRK  |
|     | Mycobacterium phage_MoMoMixon                 | PW-OMCEH-A   | FVKE-GTTTG  | DMIRV-----  | RQRK  |
|     | Mycobacterium phage_Pleione                   | PW-OMCEH-A   | FVKE-GTTTG  | DMIRV-----  | RQRK  |
|     | Mycobacterium phage_Willis                    | PW-OMCEH-A   | FVKE-GTTTG  | DMIRV-----  | RQRK  |
|     | Mycobacterium phage_Yucca                     | PW-OMCEH-A   | FVKE-GTTTG  | DMIRV-----  | RQRK  |
|     | Mycobacterium phage_Zeenon                    | PW-OMCEH-A   | FVKE-GTTTG  | DMIRV-----  | RQRK  |
|     | Mycobacterium phage_ZygoTaiga                 | PW-OMCEH-A   | FVKE-GTTTG  | DMIRV-----  | RQRK  |
|     | Mycobacterium phage_HyRo                      | PW-OMCEH-A   | FVKE-GTTTG  | DMIRV-----  | RRQR  |
|     | Mycobacterium phage_Alice                     | PWYOMCEH-A   | FV-----G    | DMIRV-----  | RRQRK |
|     | Mycobacterium phage_Myrna                     | PY-MACEHGA   | FVKK-----G  | DMIRMTVTEI  | RQRK  |
|     | Mycobacterium phage_Phabba                    | PW-YMCEHGA   | FVK-----G   | DMISRTV-EI  | RQRK  |

|     |                                    |             |            |         |
|-----|------------------------------------|-------------|------------|---------|
| G12 | Cellulophaga_phage_phi17:2_18      | PEQHLLRAKI  | GMDTVRMYSN | W-----F |
|     | Cellulophaga_phage_phi17:2_        | PEQHLLRAKI  | GMDTVRMYSN | W-----F |
|     | Cellulophaga_phage_phi4:1_13       | PEQHLLRAKI  | GMDTVRMYSN | W-----F |
|     | Cellulophaga_phage_phi4:1_18       | PEQHLLRAKI  | GMDTVRMYSN | W-----F |
|     | Cellulophaga_phage_phi4:1_         | PEQHLLRAKI  | GMDTVRMYSN | W-----F |
|     | Cellulophaga_phage_phi38.1         | -----KI     | GMDTVRS-SN | FPEQHLS |
|     | Cellulophaga_phage_phi40.1         | -----KI     | GMDTVRS-SN | FPEQHLS |
| G13 | Aeromonas_phage_65.2               | LRIGMMNSKY  | WAPTISD    |         |
|     | Aeromonas_virus_65                 | LRIGMMNSKY  | WAPTISD    |         |
| G14 | Enterobacter_phage_PG7             | TKENDMQHSW  | MGPFMRCLT  |         |
|     | Klebsiella_phage_JD18              | Y-KNDMQHSI  | WGPMRL--T  |         |
|     | Klebsiella_phage_KPV15             | Y-KNDMQHSI  | WGPMRL--T  |         |
|     | Klebsiella_phage_PKO111            | Y-KNDMQHSI  | WGPMRL--T  |         |
|     | Klebsiella_phage_vB_KpnM_KpV477    | Y-KNDMQHSI  | WGPMRL--T  |         |
| G15 | Vibrio_phage_pVp1                  | MKEAMYNDPL  | -GTQVIMFRS | HRL     |
|     | Vibrio_phage_vB_VorSPVo5           | MKEAMYNDPL  | SGTOV----- |         |
| G16 | Pseudomonas_phage_C11              | QRKLIDMCNP  | GFEHT      |         |
|     | Pseudomonas_phage_JG004            | QRKLIDMCNP  | GFEHT      |         |
|     | Pseudomonas_phage_PaP1             | QRKLIDMCNP  | GFEHT      |         |
|     | Pseudomonas_phage_vB_PaeM_C210_Ab1 | QRKLIDMCNP  | GFEHT      |         |
|     | Pseudomonas_phage_Ziegelbrücke     | QRKLIDMCNP  | GFEHT      |         |
| G17 | Cronobacter_phage_CR3              | TCL-SKNEED  | IPMLGQHSFF |         |
|     | Cronobacter_phage_CR8              | TCL-SKN-ED  | IPMLGQHSFF |         |
|     | Cronobacter_phage_CR9              | TCLYSKN-ED  | IPMLGQHSFF |         |
| G18 | Bacillus_phage_vB_BanSTsamsa       | NDWGQHMFCE  | IYL-PATSSG | RR      |
|     | Bacillus_phage_PBC2                | ND-GO--LCE  | YLTKPATSSG | RR      |
| G19 | Enterobacteria_phage_ECGD1         | MLSSKYNTGQ  | PFLMMI     |         |
|     | Escherichia_phage_vB_EcoM_PHB05    | MLSSKYNTGQ  | PFLMMI     |         |
|     | Enterobacteria_phage_phi92         | MLSS--YNTGQ | PFLMI-     |         |
| G20 | Listeria_phage_List36              | CSIDLTYQWK  | FSNGRPM    |         |
|     | Listeria_phage_LP048               | CSIDLTYQWK  | FSNGRPM    |         |
|     | Listeria_phage_LP064               | CSIDLTYQWK  | FSNGRPM    |         |
|     | Listeria_phage_LP0832              | CSIDLTYQWK  | FSNGRPM    |         |
|     | Listeria_phage_LP124               | CSIDLTYQWK  | FSNGRPM    |         |
|     | Listeria_phage_LP125               | CSIDLTYQWK  | FSNGRPM    |         |
|     | Listeria_phage_vB_LmoM_AG20        | CSIDLTYQWK  | FSNGRPM    |         |
|     | Listeria_phage_WIL1                | CSIDLTYQWK  | FSNGRPM    |         |
|     | Listeria_virus_A511                | CSIDLTYQWK  | FSNGRPM    |         |
|     | Listeria_virus_P100                | CSIDLTYQWK  | FSNGRPM    |         |
| G21 | Aeromonas_phage_31.2               | LSFNKKHGPT  | WISDMMR    |         |
|     | Aeromonas_phage_44RR2.8t.2         | LSFNKKHGPT  | WISDMMR    |         |
|     | Aeromonas_phage_L96                | LSFNKKHGPT  | WISDMMR    |         |
|     | Aeromonas_phage_Riv10              | LSFNKKHGPT  | WISDMMR    |         |
|     | Aeromonas_phage_SW699              | LSFNKKHGPT  | WISDMMR    |         |
|     | Aeromonas_virus_44RR2              | LSFNKKHGPT  | WISDMMR    |         |
|     | Aeromonas_phage_phiAS4             | LS--NYKHGPT | WISDMMR    |         |
|     | Stenotrophomonas_phage_IME13       | LS--NYKHGPT | WISDMMR    |         |
|     | Aeromonas_phage_ASgz               | LS--NYKHGPT | WI--DMMR   |         |
|     | Aeromonas_virus_31                 | LSFNKKHGPT  | -ISDMMR    |         |
| G22 | Acinetobacter_phage_AM24           | YINDQAEKFV  | SGPLLTMM   |         |
|     | Acinetobacter_phage_YMC13_03_R2096 | YINDQAEKHV  | SGPLLTMM-  |         |
| G23 | Serratia_phage_CBH8                | YDEKNMQHSP  | IWGM-RL    |         |
|     | Serratia_phage_CHI14               | YDEKNMQHSP  | IWGM-RL    |         |
|     | Serratia_phage_X20                 | YDEKNMQHSP  | IWGMLRT    |         |

Singletons

|                                       |             |            |            |         |
|---------------------------------------|-------------|------------|------------|---------|
| Stenotrophomonas phage vB_SmaSDLP_6   | PDLMGMYLIF  | RTNETINKEA | CGQWVTVDRL | FHKRPLQ |
| Synechococcus phage_SPM2              | RKYDEISSMH  | QWRVPG     |            |         |
| Enterococcus phage_EFDG1              | NQSDDEMWCFI | KRRVIHLLSS | RAF        |         |
| Pectobacterium phage_Myl              | LRSYEMQRWN  | DKGKTPAKLM | GIVLS      |         |
| Cafeteria roenbergensis virus_BVPW1   | YLLKLLLLK   | LLLK       |            |         |
| Cronobacter phage_S13                 | LLMKEDPNL   | RGFAQWCIRM | MHST       |         |
| Acinetobacter virus_133               | MGCRIYETNSI | PDMMW      |            |         |
| Pseudomonas phage_phiPsa374           | KSLVQWREDI  | LRNNPALCGE |            |         |
| Agrobacterium phage_Atu_ph07          | ARFPIYWMEV  | QFPOGL     |            |         |
| Roseobacter phage_DSS3P8              | YAVVAAKNCH  | DGQGLFLTL  | KTRTP      |         |
| Acinetobacter phage_vB_AbaM_Acibel004 | SYSRFMINPO  | DTWQHKGEEL | L          |         |
| Pseudomonas phage_VCM                 | KSSLVQREDR  | INPALCG    |            |         |
| Halovirus_HGTV1                       | RDAFEHGGNY  | KMTTQKQST  | SOICSRRLLI | LPVVS   |
| Providencia phage_vB_PreS_PR1         | KSPADFHVTR  | YEINGLLSWS | MQM        |         |
| Gordonia phage_GMA2                   | WQNMTPYDLE  | KKSSETR    |            |         |
| Lactobacillus phage_LpeD              | RRISNSLKLL  | FWPTG      |            |         |
| Acinetobacter phage_Acj9              | YQCGTKNSI   | PYREDMMFW  |            |         |
| Sulfitobacter phage_phiCB2047B        | TPNFKQCSS   | LLWYM      |            |         |
| Synechococcus phage_SCRM01            | GRKPYGDWNE  | EPPIIFAVSS |            |         |
| Sphingobium phage_Lacusarx            | PVVANIKKGD  | EEGRFSLLTH | QSCW       |         |
| Pseudoalteromonas phage_J21           | TAKHPENDWR  | GSYCM      |            |         |
| Ralstonia phage_RSP15                 | SSECDPYFLN  | VMQRWK     |            |         |
| Stenotrophomonas phage_IMESM1         | RIHWCKNAVM  | ELSYEDQSG  |            |         |
| Klebsiella phage_vB_Kpn_IME260        | RMQEALSHRC  | MIMVDYNCKE | LPTW       |         |
| Streptomyces phage_BRock              | PFMGQODEE   | TTTLLWNAKK | RRVRSSIH   |         |
