# Supplementary material for: Global In-Silico Scenario of tRNA Genes and Their Organization in Virus Genomes
Source: MDPI journal article supplement (doi:10.3390/v11020180), 2019-02-21
Supplement: s1 [file s1]

Table S4 Number of matching codons

| Genome                                        | #Codons provided by the clusters | #MCP codons RSCU > 1 | #MCP matching codons | % MCP Matching codons / Most used codons | #Genome codons RSCU > 1 | #Genome matching codons | %Genome Matching codons / Most used codons |
|-----------------------------------------------|----------------------------------|----------------------|----------------------|------------------------------------------|-------------------------|-------------------------|--------------------------------------------|
| Stenotrophomonas phage vB SmaS-DLP 6          | 31                               | 23                   | 17                   | 0.74                                     | 25                      | 18                      | 0.72                                       |
| Halovirus HGTV-1                              | 34                               | 24                   | 17                   | 0.71                                     | 30                      | 20                      | 0.67                                       |
| Sphingobium phage Lacusarx                    | 24                               | 23                   | 18                   | 0.78                                     | 26                      | 17                      | 0.65                                       |
| Vibrio phage vB VorS-PV05                     | 14                               | 24                   | 11                   | 0.46                                     | 25                      | 15                      | 0.60                                       |
| Caulobacter phage Cor10                       | 24                               | 22                   | 15                   | 0.68                                     | 26                      | 15                      | 0.58                                       |
| Caulobacter phage Cor2                        | 24                               | 22                   | 15                   | 0.68                                     | 26                      | 15                      | 0.58                                       |
| Caulobacter phage Cor29                       | 24                               | 22                   | 15                   | 0.68                                     | 26                      | 15                      | 0.58                                       |
| Caulobacter phage CorKarma                    | 24                               | 22                   | 15                   | 0.68                                     | 26                      | 15                      | 0.58                                       |
| Rosobacter phage DSS3P8                       | 24                               | 22                   | 17                   | 0.71                                     | 26                      | 15                      | 0.58                                       |
| Vibriophage phi-p02                           | 23                               | 22                   | 15                   | 0.64                                     | 26                      | 15                      | 0.58                                       |
| Erwinia amylovora phage phiEa104              | 24                               | 23                   | 13                   | 0.57                                     | 25                      | 14                      | 0.56                                       |
| Erwinia phage phiEa21-4                       | 24                               | 24                   | 13                   | 0.54                                     | 25                      | 14                      | 0.56                                       |
| Erwinia phage vB EamKsM7                      | 24                               | 23                   | 12                   | 0.52                                     | 24                      | 13                      | 0.54                                       |
| Caulobacter phage Cor32                       | 22                               | 22                   | 14                   | 0.64                                     | 24                      | 14                      | 0.54                                       |
| Caulobacter phage Cor34                       | 22                               | 22                   | 14                   | 0.64                                     | 26                      | 14                      | 0.54                                       |
| Caulobacter phage Cor5                        | 23                               | 22                   | 14                   | 0.64                                     | 26                      | 14                      | 0.54                                       |
| Caulobacter phage CorColossus                 | 22                               | 24                   | 15                   | 0.63                                     | 26                      | 14                      | 0.54                                       |
| Caulobacter phage CorMagne10                  | 23                               | 22                   | 14                   | 0.64                                     | 26                      | 14                      | 0.54                                       |
| Caulobacter phage CorRogue                    | 23                               | 20                   | 14                   | 0.70                                     | 26                      | 14                      | 0.54                                       |
| Caulobacter phage CorSwill                    | 23                               | 22                   | 14                   | 0.64                                     | 26                      | 14                      | 0.54                                       |
| Caulobacter phage phiCk                       | 22                               | 22                   | 14                   | 0.64                                     | 26                      | 14                      | 0.54                                       |
| Mycobacterium phage Myna                      | 25                               | 24                   | 14                   | 0.58                                     | 26                      | 14                      | 0.54                                       |
| Vibrio phage vt-1                             | 24                               | 23                   | 16                   | 0.70                                     | 30                      | 16                      | 0.53                                       |
| Mycobacterium phage BeanWater                 | 24                               | 24                   | 13                   | 0.54                                     | 25                      | 13                      | 0.52                                       |
| Mycobacterium phage ET08                      | 24                               | 24                   | 13                   | 0.54                                     | 25                      | 13                      | 0.52                                       |
| Streptomyces phage BfRock                     | 28                               | 28                   | 17                   | 0.61                                     | 27                      | 14                      | 0.52                                       |
| Bacteriophage VVP40                           | 23                               | 22                   | 14                   | 0.64                                     | 29                      | 15                      | 0.52                                       |
| Vibrio phage phi-p-1                          | 20                               | 25                   | 15                   | 0.60                                     | 29                      | 15                      | 0.52                                       |
| Bacillus phage PK16                           | 19                               | 24                   | 13                   | 0.54                                     | 28                      | 14                      | 0.50                                       |
| Escherichia phage SUSP2                       | 24                               | 23                   | 13                   | 0.57                                     | 28                      | 14                      | 0.50                                       |
| Mycobacteriophage Celera                      | 25                               | 25                   | 14                   | 0.56                                     | 24                      | 14                      | 0.50                                       |
| Mycobacteriophage Wildcat                     | 23                               | 27                   | 15                   | 0.56                                     | 26                      | 13                      | 0.50                                       |
| Mycobacterium phage Bigswale                  | 24                               | 24                   | 13                   | 0.54                                     | 24                      | 12                      | 0.50                                       |
| Mycobacterium phage Cosmo                     | 23                               | 26                   | 14                   | 0.54                                     | 30                      | 15                      | 0.50                                       |
| Mycobacterium phage LRRHood                   | 24                               | 24                   | 13                   | 0.54                                     | 26                      | 13                      | 0.50                                       |
| Mycobacterium phage Nappy                     | 25                               | 24                   | 13                   | 0.54                                     | 24                      | 12                      | 0.50                                       |
| Mycobacterium phage Phabba                    | 24                               | 22                   | 12                   | 0.55                                     | 26                      | 13                      | 0.50                                       |
| Shigella phage S113                           | 24                               | 23                   | 14                   | 0.61                                     | 26                      | 13                      | 0.50                                       |
| Shigella phage S118                           | 24                               | 23                   | 14                   | 0.61                                     | 26                      | 13                      | 0.50                                       |
| Vibrio phage phi-Gm1                          | 23                               | 23                   | 13                   | 0.61                                     | 31                      | 15                      | 0.48                                       |
| Vibrio phage phi-S12                          | 23                               | 23                   | 13                   | 0.61                                     | 31                      | 15                      | 0.48                                       |
| Bacillus phage Deep Blue                      | 19                               | 24                   | 12                   | 0.50                                     | 29                      | 14                      | 0.48                                       |
| Bacillus virus BM15                           | 18                               | 24                   | 12                   | 0.50                                     | 29                      | 14                      | 0.48                                       |
| Citrobacter phage Mijalis                     | 24                               | 24                   | 14                   | 0.58                                     | 25                      | 12                      | 0.48                                       |
| Citrobacter phage Moolgie                     | 24                               | 24                   | 14                   | 0.58                                     | 25                      | 12                      | 0.48                                       |
| Mycobacteriophage Bxz1                        | 24                               | 25                   | 14                   | 0.56                                     | 25                      | 12                      | 0.48                                       |
| Mycobacterium phage ArcherS7                  | 24                               | 24                   | 13                   | 0.54                                     | 25                      | 12                      | 0.48                                       |
| Mycobacterium phage Audrick                   | 24                               | 24                   | 13                   | 0.54                                     | 25                      | 12                      | 0.48                                       |
| Mycobacterium phage Bresenome                 | 24                               | 24                   | 13                   | 0.54                                     | 25                      | 12                      | 0.48                                       |
| Mycobacterium phage Cali                      | 24                               | 24                   | 13                   | 0.54                                     | 25                      | 12                      | 0.48                                       |
| Mycobacterium phage Dandelion                 | 24                               | 24                   | 13                   | 0.54                                     | 24                      | 12                      | 0.48                                       |
| Mycobacterium phage Drazdy                    | 24                               | 24                   | 13                   | 0.54                                     | 25                      | 12                      | 0.48                                       |
| Mycobacterium phage DTDDevon                  | 24                               | 24                   | 13                   | 0.54                                     | 25                      | 12                      | 0.48                                       |
| Mycobacterium phage Erdmann                   | 24                               | 24                   | 13                   | 0.54                                     | 25                      | 12                      | 0.48                                       |
| Mycobacterium phage Gabriel                   | 24                               | 24                   | 13                   | 0.54                                     | 25                      | 12                      | 0.48                                       |
| Mycobacterium phage Ghosi                     | 24                               | 24                   | 13                   | 0.54                                     | 25                      | 12                      | 0.48                                       |
| Mycobacterium phage HyRo                      | 24                               | 24                   | 12                   | 0.50                                     | 25                      | 12                      | 0.48                                       |
| Mycobacterium phage Lilleton                  | 25                               | 25                   | 14                   | 0.56                                     | 25                      | 12                      | 0.48                                       |
| Mycobacterium phage Lukili                    | 24                               | 24                   | 13                   | 0.54                                     | 25                      | 12                      | 0.48                                       |
| Mycobacterium phage Momo                      | 24                               | 24                   | 13                   | 0.54                                     | 25                      | 12                      | 0.48                                       |
| Mycobacterium phage Phox                      | 24                               | 24                   | 13                   | 0.54                                     | 25                      | 12                      | 0.48                                       |
| Mycobacterium phage Plo                       | 24                               | 25                   | 14                   | 0.56                                     | 25                      | 12                      | 0.48                                       |
| Mycobacterium phage Rizal                     | 25                               | 24                   | 13                   | 0.54                                     | 25                      | 12                      | 0.48                                       |
| Mycobacterium phage Shrimp                    | 24                               | 24                   | 13                   | 0.54                                     | 25                      | 12                      | 0.48                                       |
| Mycobacterium phage Tonenili                  | 24                               | 23                   | 13                   | 0.57                                     | 25                      | 12                      | 0.48                                       |
| Mycobacterium phage Wally                     | 24                               | 23                   | 13                   | 0.54                                     | 25                      | 12                      | 0.48                                       |
| Bacillus phage BCP8-2                         | 18                               | 24                   | 13                   | 0.54                                     | 28                      | 13                      | 0.46                                       |
| Mycobacterium phage Rey                       | 21                               | 23                   | 12                   | 0.52                                     | 28                      | 13                      | 0.46                                       |
| Pseudomonas phage phiPa3374                   | 19                               | 23                   | 12                   | 0.52                                     | 28                      | 13                      | 0.46                                       |
| Staphylococcus phage SA1                      | 22                               | 23                   | 11                   | 0.48                                     | 28                      | 13                      | 0.46                                       |
| Citrobacter phage Mordin                      | 24                               | 23                   | 12                   | 0.61                                     | 26                      | 12                      | 0.46                                       |
| Mycobacterium phage Bongo                     | 18                               | 24                   | 11                   | 0.46                                     | 26                      | 12                      | 0.46                                       |
| Mycobacterium phage Koguma                    | 23                               | 24                   | 12                   | 0.50                                     | 26                      | 12                      | 0.46                                       |
| Shigella phage S15                            | 25                               | 23                   | 15                   | 0.65                                     | 26                      | 12                      | 0.46                                       |
| Enterobacteria phage SPC35                    | 20                               | 24                   | 9                    | 0.38                                     | 24                      | 11                      | 0.46                                       |
| Mycobacterium phage Gizmo                     | 24                               | 24                   | 12                   | 0.50                                     | 24                      | 11                      | 0.46                                       |
| Mycobacterium phage Yucca                     | 24                               | 24                   | 12                   | 0.50                                     | 24                      | 11                      | 0.46                                       |
| Bacillus cereus bacteriophage vB BceM Bce31v3 | 18                               | 25                   | 12                   | 0.48                                     | 29                      | 13                      | 0.45                                       |
| Bacillus phage Bcp1                           | 18                               | 25                   | 11                   | 0.44                                     | 29                      | 13                      | 0.45                                       |
| Bacillus phage BCU4                           | 18                               | 26                   | 12                   | 0.46                                     | 29                      | 13                      | 0.45                                       |
| Bacillus phage BCP01                          | 19                               | 25                   | 13                   | 0.52                                     | 29                      | 13                      | 0.45                                       |
| Bacillus phage TsarBomba                      | 19                               | 26                   | 12                   | 0.46                                     | 29                      | 13                      | 0.45                                       |
| Cronobacter phage S13                         | 22                               | 24                   | 11                   | 0.46                                     | 29                      | 13                      | 0.45                                       |
| Enterobacter phage PG7                        | 17                               | 21                   | 8                    | 0.38                                     | 27                      | 12                      | 0.44                                       |
| Enterococcus phage EFDG1                      | 23                               | 24                   | 12                   | 0.54                                     | 27                      | 12                      | 0.44                                       |
| Escherichia phage SUSP1                       | 24                               | 23                   | 13                   | 0.57                                     | 27                      | 12                      | 0.44                                       |
| Mycobacterium phage Bricole                   | 19                               | 24                   | 11                   | 0.46                                     | 24                      | 12                      | 0.44                                       |
| Citrobacter phage Michrone                    | 24                               | 23                   | 14                   | 0.61                                     | 25                      | 11                      | 0.44                                       |
| Cronobacter phage vB CsaM GAP31               | 24                               | 21                   | 12                   | 0.57                                     | 25                      | 11                      | 0.44                                       |
| Klebsiella phage vB Kpn IME260                | 22                               | 20                   | 10                   | 0.48                                     | 25                      | 11                      | 0.44                                       |
| Mycobacterium phage Aelrae                    | 23                               | 24                   | 12                   | 0.50                                     | 25                      | 11                      | 0.44                                       |
| Mycobacterium phage Ava3                      | 24                               | 24                   | 12                   | 0.50                                     | 25                      | 11                      | 0.44                                       |
| Mycobacterium phage Darfordi                  | 24                               | 24                   | 12                   | 0.50                                     | 25                      | 11                      | 0.44                                       |
| Mycobacterium phage ErnieJ                    | 23                               | 24                   | 12                   | 0.50                                     | 25                      | 11                      | 0.44                                       |
| Mycobacterium phage LinSu                     | 23                               | 24                   | 12                   | 0.50                                     | 25                      | 11                      | 0.44                                       |
| Mycobacterium phage MoMoMixon                 | 24                               | 24                   | 12                   | 0.50                                     | 25                      | 11                      | 0.44                                       |
| Mycobacterium phage Plectone                  | 24                               | 24                   | 12                   | 0.50                                     | 25                      | 11                      | 0.44                                       |
| Mycobacterium phage ScottMcG                  | 24                               | 23                   | 12                   | 0.50                                     | 25                      | 11                      | 0.44                                       |
| Mycobacterium phage Sebata                    | 23                               | 24                   | 12                   | 0.50                                     | 25                      | 11                      | 0.44                                       |
| Mycobacterium phage Spud                      | 23                               | 24                   | 12                   | 0.50                                     | 25                      | 11                      | 0.44                                       |
| Mycobacterium phage Willis                    | 24                               | 24                   | 12                   | 0.50                                     | 25                      | 11                      | 0.44                                       |
| Mycobacterium phage Zeenon                    | 24                               | 25                   | 13                   | 0.52                                     | 25                      | 11                      | 0.44                                       |
| Mycobacterium phage ZygoTaiga                 | 24                               | 24                   | 12                   | 0.50                                     | 25                      | 11                      | 0.44                                       |
| Streptomyces phage Sameti12                   | 23                               | 28                   | 15                   | 0.54                                     | 28                      | 12                      | 0.43                                       |
| Mycobacterium phage Genevab15                 | 21                               | 23                   | 11                   | 0.48                                     | 28                      | 12                      | 0.43                                       |
| Pseudomonas phage VCM                         | 17                               | 22                   | 11                   | 0.50                                     | 28                      | 12                      | 0.43                                       |
| Bacillus phage PBC2                           | 19                               | 23                   | 15                   | 0.65                                     | 26                      | 11                      | 0.42                                       |
| Escherichia coli O157 typing phage 12         | 17                               | 23                   | 9                    | 0.39                                     | 26                      | 11                      | 0.42                                       |
| Escherichia phage HY02                        | 24                               | 22                   | 12                   | 0.55                                     | 26                      | 11                      | 0.42                                       |
| Escherichia phage JH2                         | 25                               | 24                   | 14                   | 0.58                                     | 26                      | 11                      | 0.42                                       |
| Mycobacterium phage PegLeg                    | 18                               | 24                   | 11                   | 0.46                                     | 26                      | 11                      | 0.42                                       |
| Providencia phage vB PRes PR1                 | 22                               | 25                   | 14                   | 0.56                                     | 26                      | 11                      | 0.42                                       |
| Shigella phage S16                            | 24                               | 22                   | 13                   | 0.59                                     | 26                      | 11                      | 0.42                                       |
| Streptomyces phage NoodNoot                   | 22                               | 25                   | 14                   | 0.56                                     | 31                      | 13                      | 0.42                                       |
| Bacillus phage BCP7B                          | 18                               | 26                   | 11                   | 0.42                                     | 29                      | 12                      | 0.41                                       |
| Bacillus phage PBC6                           | 17                               | 26                   | 13                   | 0.50                                     | 29                      | 12                      | 0.41                                       |
| Pectobacterium phage My1                      | 24                               | 22                   | 11                   | 0.50                                     | 27                      | 11                      | 0.41                                       |
| Salmonella phage vB SPuM SP116                | 24                               | 24                   | 14                   | 0.58                                     | 27                      | 11                      | 0.41                                       |
| Aeromonas phage phiAS5                        | 22                               | 23                   | 11                   | 0.48                                     | 30                      | 12                      | 0.40                                       |
| Stenotrophomonas phage IME-SM1                | 19                               | 23                   | 11                   | 0.48                                     | 25                      | 10                      | 0.40                                       |
| Streptomyces phage Jay2Jay                    | 22                               | 26                   | 14                   | 0.54                                     | 30                      | 12                      | 0.40                                       |
| Streptomyces phage Paradiodes                 | 22                               | 26                   | 14                   | 0.54                                     | 30                      | 12                      | 0.40                                       |
| Streptomyces phage Pieba                      | 22                               | 27                   | 14                   | 0.52                                     | 30                      | 12                      | 0.40                                       |
| Streptomyces phage Sush23                     | 22                               | 27                   | 14                   | 0.52                                     | 30                      | 12                      | 0.40                                       |
| Cellulophaga phage phi38:1                    | 18                               | 24                   | 15                   | 0.63                                     | 28                      | 11                      | 0.39                                       |
| Cellulophaga phage phi4:1                     | 21                               | 24                   | 8                    | 0.33                                     | 28                      | 11                      | 0.39                                       |
| Mycobacterium phage GardenSalsa               | 21                               | 22                   | 11                   | 0.50                                     | 28                      | 11                      | 0.39                                       |
| Mycobacterium phage MrMago                    | 21                               | 22                   | 11                   | 0.50                                     | 28                      | 11                      | 0.39                                       |
| Streptomyces phage Wipry                      | 21                               | 27                   | 13                   | 0.48                                     | 31                      | 12                      | 0.39                                       |
| Bacteriophage Felix 01                        | 24                               | 22                   | 13                   | 0.59                                     | 26                      | 10                      | 0.38                                       |
| Cronobacter phage CR3                         | 19                               | 22                   | 7                    | 0.32                                     | 26                      | 10                      | 0.38                                       |
| Enterobacteria phage ECGD1                    | 14                               | 22                   | 7                    | 0.32                                     | 26                      | 10                      | 0.38                                       |
| Enterobacteria phage Wb8                      | 25                               | 23                   | 14                   | 0.61                                     | 26                      | 10                      | 0.38                                       |
| Escherichia coli O157 typing phage 1          | 25                               | 23                   | 14                   | 0.61                                     | 26                      | 10                      | 0.38                                       |
| Escherichia phage E06                         | 24                               | 24                   | 14                   | 0.58                                     | 26                      | 10                      | 0.38                                       |
| Escherichia phage vB ECOM AY0145A             | 24                               | 22                   | 13                   | 0.59                                     | 26                      | 10                      | 0.38                                       |
| Escherichia phage vB EColi-Vpae1              | 24                               | 23                   | 13                   | 0.57                                     | 26                      | 10                      | 0.38                                       |
| Salmonella phage BPS15Q2                      | 24                               | 23                   | 14                   | 0.61                                     | 26                      | 10                      | 0.38                                       |
| Salmonella phage FO1a                         | 24                               | 26                   | 13                   | 0.52                                     | 26                      | 10                      | 0.38                                       |
| Yersinia phage phiR201                        | 21                               | 24                   | 11                   | 0.46                                     | 26                      | 10                      | 0.38                                       |
| Bacteriophage Aeh1                            | 21                               | 22                   | 10                   | 0.45                                     | 29                      | 11                      | 0.38                                       |
| Cronobacter phage CR9                         | 19                               | 23                   | 9                    | 0.39                                     | 27                      | 10                      | 0.37                                       |
| Aeromonas phage PK29                          | 21                               | 23                   | 12                   | 0.52                                     | 30                      | 11                      | 0.37                                       |
| Escherichia phage vB EcolS AKFV33             | 9                                | 22                   | 9                    | 0.39                                     | 25                      | 9                       | 0.36                                       |
| Salmonella phage 118970 sal2                  | 25                               | 22                   | 9                    | 0.35                                     | 25                      | 9                       | 0.36                                       |
| Cellulophaga phage phi17-2_18                 | 21                               | 20                   | 8                    | 0.40                                     | 28                      | 10                      | 0.36                                       |
| Cellulophaga phage phi17-2                    | 21                               | 20                   | 8                    | 0.40                                     | 28                      | 10                      | 0.36                                       |
| Cellulophaga phage phi4:1_1_13                | 8                                | 20                   | 8                    | 0.40                                     | 28                      | 10                      | 0.36                                       |
| Cellulophaga phage phi4:1_1                   | 21                               | 20                   | 8                    | 0.40                                     | 28                      | 10                      | 0.36                                       |
| Cellulophaga phage phi40:1                    | 18                               | 20                   | 15                   | 0.75                                     | 28                      | 10                      | 0.36                                       |
| Vibrio phage VainK3                           | 23                               | 24                   | 14                   | 0.58                                     | 31                      | 11                      | 0.35                                       |
| Bacillus phage vB BanS-Tsamsa                 | 21                               | 20                   | 12                   | 0.60                                     | 26                      | 9                       | 0.35                                       |
| Escherichia phage vB ECOM A185                | 23                               | 25                   | 14                   | 0.56                                     | 26                      | 9                       | 0.35                                       |
| Salmonella phage Mushroom                     | 23                               | 24                   | 13                   | 0.54                                     | 26                      | 9                       | 0.35                                       |
| Salmonella phage PVP-SE1                      | 23                               | 21                   | 10                   | 0.48                                     | 26                      | 9                       | 0.35                                       |
| Salmonella phage ST11                         | 23                               | 23                   | 10                   | 0.57                                     | 26                      | 9                       | 0.35                                       |
| Salmonella phage Stitch                       | 25                               | 21                   | 11                   | 0.52                                     | 26                      | 9                       | 0.35                                       |
| Acinetobacter phage AN24                      | 17                               | 24                   | 13                   | 0.54                                     | 27                      | 9                       | 0.33                                       |
| Acinetobacter phage YMC13 03 R2096            | 17                               | 23                   | 12                   | 0.52                                     | 27                      | 9                       | 0.33                                       |
| Cronobacter phage CR8                         | 18                               | 22                   | 7                    | 0.32                                     | 24                      | 8                       | 0.33                                       |

|                                       |    |    |    |      |    |    |      |
|---------------------------------------|----|----|----|------|----|----|------|
| Pseudomonas phage Zigelbrucke         | 15 | 25 | 9  | 0.36 | 27 | 9  | 0.33 |
| Salmonella phage SSE-121              | 21 | 21 | 10 | 0.48 | 27 | 9  | 0.33 |
| Streptomyces phage Midred21           | 19 | 25 | 11 | 0.44 | 30 | 10 | 0.33 |
| Sulfitobacter phage phiCB2047-B       | 15 | 23 | 9  | 0.39 | 27 | 9  | 0.33 |
| Escherichia phage OSVSP               | 21 | 22 | 9  | 0.41 | 25 | 8  | 0.32 |
| Escherichia phage vB EcoS FFH1        | 20 | 21 | 8  | 0.38 | 25 | 8  | 0.32 |
| Salmonella phage 100266 sal2          | 25 | 22 | 12 | 0.55 | 25 | 8  | 0.32 |
| Salmonella phage SP01                 | 21 | 19 | 6  | 0.32 | 25 | 8  | 0.32 |
| Acinetobacter phage vB AbaM Acibel004 | 20 | 23 | 9  | 0.39 | 29 | 9  | 0.31 |
| Bacteriophage T5                      | 20 | 20 | 9  | 0.45 | 26 | 8  | 0.31 |
| Escherichia phage slun09              | 19 | 22 | 7  | 0.32 | 26 | 8  | 0.31 |
| Klebsiella phage vB KpnM KB57         | 22 | 23 | 12 | 0.52 | 26 | 8  | 0.31 |
| Pseudomonas phage J2-1                | 16 | 24 | 10 | 0.42 | 26 | 8  | 0.31 |
| Pseudomonas phage J0004               | 15 | 26 | 9  | 0.35 | 26 | 8  | 0.31 |
| Salmonella phage S13                  | 20 | 25 | 12 | 0.49 | 26 | 8  | 0.31 |
| Salmonella phage 41                   | 18 | 23 | 9  | 0.36 | 27 | 8  | 0.30 |
| Serratia phage X20                    | 16 | 20 | 6  | 0.30 | 24 | 7  | 0.29 |
| Vibrio phage VHTD                     | 23 | 23 | 14 | 0.61 | 31 | 9  | 0.29 |
| Gordonia phage GMA2                   | 17 | 23 | 9  | 0.39 | 28 | 8  | 0.29 |
| Pseudomonas phage PaP1                | 15 | 25 | 9  | 0.36 | 28 | 8  | 0.29 |
| Synechococcus phage S-PM2             | 16 | 25 | 8  | 0.32 | 28 | 8  | 0.29 |
| Escherichia phage phiLLS              | 19 | 21 | 7  | 0.33 | 25 | 7  | 0.28 |
| Klebsiella phage PKO111               | 15 | 22 | 4  | 0.18 | 25 | 7  | 0.28 |
| Klebsiella phage vB KpnM BIS47        | 20 | 23 | 10 | 0.43 | 25 | 7  | 0.28 |
| Klebsiella phage vB KpnM KpV477       | 15 | 23 | 5  | 0.22 | 25 | 7  | 0.28 |
| Pseudomonas phage vB PseM C2-10 Ab1   | 15 | 25 | 9  | 0.36 | 25 | 7  | 0.28 |
| Salmonella phage 19                   | 14 | 23 | 9  | 0.39 | 25 | 7  | 0.28 |
| Enterobacteriophage UAB Phi87         | 20 | 22 | 10 | 0.45 | 26 | 7  | 0.27 |
| Escherichia coli O157 typing phage 11 | 25 | 23 | 14 | 0.61 | 26 | 7  | 0.27 |
| Listeria phage List-36                | 17 | 28 | 11 | 0.39 | 26 | 7  | 0.27 |
| Listeria phage LP-048                 | 17 | 27 | 10 | 0.37 | 26 | 7  | 0.27 |
| Listeria phage LP-064                 | 17 | 28 | 11 | 0.39 | 26 | 7  | 0.27 |
| Listeria phage LP-063-2               | 17 | 28 | 11 | 0.39 | 26 | 7  | 0.27 |
| Listeria phage LP-124                 | 17 | 28 | 11 | 0.39 | 26 | 7  | 0.27 |
| Listeria phage LP-125                 | 17 | 28 | 11 | 0.39 | 26 | 7  | 0.27 |
| Listeria phage vB LmoM AG20           | 17 | 28 | 12 | 0.43 | 26 | 7  | 0.27 |
| Listeria phage WL-1                   | 17 | 27 | 10 | 0.37 | 26 | 7  | 0.27 |
| Listeria virus A511                   | 17 | 28 | 11 | 0.39 | 26 | 7  | 0.27 |
| Listeria virus P100                   | 17 | 28 | 12 | 0.43 | 26 | 7  | 0.27 |
| Klebsiella phage JD18                 | 15 | 23 | 4  | 0.17 | 24 | 6  | 0.25 |
| Klebsiella phage KPVI15               | 15 | 23 | 5  | 0.22 | 24 | 6  | 0.25 |
| Pseudomonas phage C11                 | 15 | 25 | 9  | 0.36 | 28 | 7  | 0.25 |
| Serratia phage CBH8                   | 15 | 22 | 6  | 0.27 | 24 | 6  | 0.25 |
| Serratia phage CH14                   | 15 | 22 | 6  | 0.27 | 24 | 6  | 0.25 |
| Aeromonas phage 31.2                  | 16 | 23 | 5  | 0.22 | 30 | 7  | 0.23 |
| Aeromonas phage 44RR2.81.2            | 16 | 23 | 5  | 0.22 | 30 | 7  | 0.23 |
| Aeromonas phage L3-6                  | 16 | 23 | 5  | 0.22 | 30 | 7  | 0.23 |
| Aeromonas phage Riv-10                | 16 | 23 | 5  | 0.22 | 30 | 7  | 0.23 |
| Aeromonas phage SW69-9                | 16 | 23 | 5  | 0.22 | 30 | 7  | 0.23 |
| Aeromonas virus 31                    | 15 | 23 | 5  | 0.22 | 30 | 7  | 0.23 |
| Aeromonas virus 44RR2                 | 16 | 23 | 5  | 0.22 | 30 | 7  | 0.23 |
| Agrobacterium phage Atu ph07          | 14 | 25 | 8  | 0.32 | 26 | 6  | 0.23 |
| Enterobacteria phage 4MG              | 24 | 24 | 13 | 0.54 | 26 | 6  | 0.23 |
| Enterobacteria phage phi62            | 13 | 24 | 6  | 0.25 | 26 | 6  | 0.23 |
| Lactobacillus phage LpeD              | 14 | 25 | 7  | 0.28 | 26 | 6  | 0.23 |
| Aeromonas phage 65.2                  | 16 | 22 | 3  | 0.14 | 27 | 6  | 0.22 |
| Aeromonas virus 65                    | 16 | 22 | 3  | 0.14 | 27 | 6  | 0.22 |
| Escherichia phage vB EcoM PHB05       | 14 | 25 | 8  | 0.32 | 27 | 6  | 0.22 |
| Synechococcus phage S-CRM01           | 17 | 25 | 10 | 0.40 | 27 | 6  | 0.22 |
| Acinetobacter phage Acj9              | 15 | 25 | 10 | 0.40 | 29 | 6  | 0.21 |
| Enterobacteria phage EPS7             | 26 | 23 | 11 | 0.48 | 26 | 5  | 0.19 |
| Acinetobacter virus 153               | 14 | 24 | 7  | 0.29 | 27 | 5  | 0.19 |
| Aeromonas phage AS-gz                 | 14 | 23 | 5  | 0.22 | 27 | 5  | 0.19 |
| Ralstonia phage RSP15                 | 16 | 23 | 6  | 0.26 | 27 | 5  | 0.19 |
| Aeromonas phage phi4S4                | 15 | 23 | 6  | 0.26 | 28 | 5  | 0.18 |
| Stenotrophomonas phage IME13          | 15 | 23 | 6  | 0.26 | 28 | 5  | 0.18 |
| Cafeteria roenbergensis virus BV-PW1  | 4  | 23 | 4  | 0.17 | 27 | 2  | 0.07 |
