# Supplementary material for: Global In-Silico Scenario of tRNA Genes and Their Organization in Virus Genomes
Source: MDPI journal article supplement (doi:10.3390/v11020180), 2019-02-21
Supplement: s1 [file s1]

**Table S3** Features of viral genomes harboring tRNA gene clusters

| Genome                                        | Genome length (bp) | Total tRNAs | tRNAs in cluster | Cluster Length (bp) | BEGIN (bp) | END (bp) | Density (tRNA/kb) | tRNA cluster group | Genome GC% | tRNA cluster GC% | Integrase | Isolation country |
|-----------------------------------------------|--------------------|-------------|------------------|---------------------|------------|----------|-------------------|--------------------|------------|------------------|-----------|-------------------|
| Bacteriophage Felix 01                        | 86155              | 25          | 25               | 6482                | 23699      | 30180    | 3.86              | G1                 | 0.3901     | 0.4047           | -         | -                 |
| Citrobacter phage Michonne                    | 90000              | 25          | 25               | 5261                | 58564      | 63824    | 4.75              | G1                 | 0.3885     | 0.4176           | -         | -                 |
| Citrobacter phage Mijalis                     | 87998              | 25          | 25               | 4686                | 60325      | 65010    | 5.55              | G1                 | 0.3898     | 0.421            | -         | USA               |
| Citrobacter phage Moogole                     | 87999              | 25          | 25               | 4687                | 60325      | 65011    | 5.55              | G1                 | 0.3898     | 0.421            | -         | -                 |
| Citrobacter phage Mordin                      | 89596              | 25          | 25               | 4746                | 28230      | 32975    | 5.48              | G1                 | 0.3881     | 0.4206           | -         | -                 |
| Enterobacteriophage UAB Phi87                 | 87603              | 28          | 21               | 4070                | 45         | 4114     | 5.16              | G1                 | 0.3889     | 0.4069           | -         | Spain             |
| Enterobacteria phage WV8                      | 88487              | 26          | 26               | 5571                | 25986      | 31556    | 4.67              | G1                 | 0.3889     | 0.4065           | -         | Canada            |
| Erwinia amylovora phage phiEa104              | 84565              | 27          | 27               | 3508                | 21812      | 25319    | 7.7               | G1                 | 0.4383     | 0.4624           | -         | -                 |
| Erwinia phage phiEa21-4                       | 84576              | 27          | 27               | 3506                | 21823      | 25328    | 7.7               | G1                 | 0.4381     | 0.4609           | -         | -                 |
| Erwinia phage vB EamM-M7                      | 84694              | 27          | 27               | 3508                | 4797       | 8304     | 7.7               | G1                 | 0.4339     | 0.4615           | -         | -                 |
| Escherichia coli O157 typing phage 11         | 88771              | 26          | 26               | 5571                | 24016      | 29586    | 4.67              | G1                 | 0.3889     | 0.4064           | -         | -                 |
| Escherichia coli O157 typing phage 1          | 88531              | 26          | 26               | 5143                | 10198      | 15340    | 5.06              | G1                 | 0.3885     | 0.4107           | -         | -                 |
| Escherichia phage EC6                         | 86231              | 25          | 25               | 5257                | 11934      | 17190    | 4.76              | G1                 | 0.389      | 0.4134           | -         | South Korea       |
| Escherichia phage HY02                        | 86252              | 25          | 25               | 4825                | 25341      | 30165    | 5.18              | G1                 | 0.3892     | 0.4114           | -         | -                 |
| Escherichia phage JH2                         | 87712              | 26          | 26               | 5087                | 69613      | 74699    | 5.11              | G1                 | 0.3882     | 0.411            | -         | Vietnam           |
| Escherichia phage SUSP1                       | 90743              | 25          | 25               | 5730                | 47552      | 53281    | 4.36              | G1                 | 0.3976     | 0.4147           | -         | USA               |
| Escherichia phage SUSP2                       | 88698              | 25          | 25               | 5468                | 45779      | 51246    | 4.57              | G1                 | 0.4016     | 0.4225           | -         | USA               |
| Escherichia phage vB EcoM Alf5                | 87662              | 24          | 24               | 5252                | 24208      | 29459    | 4.57              | G1                 | 0.3902     | 0.4109           | -         | Lithuania         |
| Escherichia phage vB EcoM AYO145A             | 87372              | 25          | 25               | 4946                | 26382      | 31327    | 5.05              | G1                 | 0.39       | 0.4143           | -         | Canada            |
| Escherichia phage vB EcoM-VpaE1               | 88403              | 25          | 25               | 4838                | 25483      | 30320    | 5.17              | G1                 | 0.3894     | 0.4128           | -         | Lithuania         |
| Salmonella phage BPS15Q2                      | 89817              | 25          | 25               | 5491                | 10996      | 16486    | 4.55              | G1                 | 0.3886     | 0.4096           | -         | China             |
| Salmonella phage FO1a                         | 83331              | 25          | 25               | 6482                | 23621      | 30102    | 3.86              | G1                 | 0.3893     | 0.4047           | -         | -                 |
| Salmonella phage Mushroom                     | 87709              | 24          | 24               | 4986                | 60589      | 65574    | 4.81              | G1                 | 0.3903     | 0.4144           | -         | -                 |
| Salmonella phage Si3                          | 84419              | 22          | 22               | 4245                | 2154       | 6398     | 5.18              | G1                 | 0.3901     | 0.4181           | -         | -                 |
| Salmonella phage ST11                         | 82101              | 24          | 24               | 5342                | 22896      | 28237    | 4.49              | G1                 | 0.3902     | 0.4126           | -         | -                 |
| Salmonella phage vB SPuM SP116                | 87510              | 25          | 25               | 4891                | 26880      | 31770    | 5.11              | G1                 | 0.3884     | 0.4105           | -         | China             |
| Shigella phage Sf13                           | 87570              | 25          | 25               | 4692                | 11656      | 16347    | 5.33              | G1                 | 0.3891     | 0.4205           | -         | -                 |
| Shigella phage Sf15                           | 88474              | 26          | 26               | 4667                | 67419      | 72085    | 5.57              | G1                 | 0.39       | 0.4225           | -         | -                 |
| Shigella phage Sf16                           | 88580              | 25          | 25               | 5075                | 16042      | 21116    | 4.93              | G1                 | 0.3902     | 0.4114           | -         | -                 |
| Shigella phage Sf18                           | 90270              | 25          | 25               | 4929                | 66345      | 71273    | 5.07              | G1                 | 0.39       | 0.4163           | -         | -                 |
| Staphylococcus phage SA1                      | 147303             | 25          | 22               | 4850                | 58449      | 63298    | 4.54              | G1                 | 0.4583     | 0.4064           | -         | South Korea       |
| Escherichia coli O157 typing phage 12         | 88632              | 26          | 17               | 3759                | 84667      | 88425    | 4.52              | G1                 | 0.38907    | 0.40117          | -         | -                 |
| Bacillus cereus bacteriophage vB BceM Bc431v3 | 158621             | 20          | 20               | 2437                | 155868     | 158304   | 8.21              | G10                | 0.3998     | 0.461            | -         | -                 |
| Bacillus phage JBP901                         | 159492             | 20          | 20               | 2867                | 156041     | 158907   | 6.98              | G10                | 0.3966     | 0.4423           | -         | -                 |
| Bacillus phage Bcp1                           | 152778             | 18          | 18               | 2202                | 30794      | 32995    | 8.17              | G10                | 0.39757    | 0.46367          | -         | USA               |
| Bacillus phage BCP78                          | 156176             | 18          | 18               | 2744                | 37         | 2780     | 6.55              | G10                | 0.39859    | 0.43950          | -         | -                 |
| Bacillus phage BCP8-2                         | 159071             | 18          | 18               | 2945                | 33452      | 36396    | 6.11              | G10                | 0.39452    | 0.43667          | -         | South Korea       |
| Bacillus phage BCU4                           | 154371             | 19          | 19               | 3699                | 148023     | 151721   | 5.13              | G10                | 0.39857    | 0.42687          | -         | -                 |
| Bacillus phage Deep Blue                      | 157501             | 19          | 19               | 2461                | 140342     | 142802   | 7.72              | G10                | 0.39947    | 0.45469          | -         | -                 |
| Bacillus phage PBC6                           | 157147             | 17          | 17               | 2638                | 37         | 2674     | 6.44              | G10                | 0.39910    | 0.44390          | -         | -                 |
| Bacillus phage PK16                           | 158127             | 19          | 19               | 3005                | 154511     | 157515   | 6.32              | G10                | 0.39858    | 0.44226          | -         | South Korea       |
| Bacillus phage TsarBomba                      | 162486             | 19          | 19               | 2594                | 26558      | 29151    | 7.32              | G10                | 0.40074    | 0.46877          | -         | Russia            |
| Bacillus virus BM15                           | 165213             | 18          | 18               | 2047                | 29057      | 31103    | 8.79              | G10                | 0.39605    | 0.46458          | -         | -                 |

|                               |        |    |    |      |       |        |      |     |        |        |   |              |
|-------------------------------|--------|----|----|------|-------|--------|------|-----|--------|--------|---|--------------|
| Mycobacteriophage Bxz1        | 156102 | 33 | 26 | 6668 | 94073 | 100740 | 4.05 | G11 | 0.6477 | 0.6164 | - | -            |
| Mycobacteriophage Catera      | 153766 | 34 | 27 | 6794 | 90077 | 96870  | 4.12 | G11 | 0.6474 | 0.6138 | - | -            |
| Mycobacterium phage Alice     | 153401 | 29 | 22 | 6070 | 90640 | 96709  | 3.79 | G11 | 0.6468 | 0.6115 | - | USA          |
| Mycobacterium phage ArcherS7  | 156558 | 33 | 26 | 7025 | 91290 | 98314  | 3.84 | G11 | 0.6469 | 0.6115 | - | USA          |
| Mycobacterium phage Astraea   | 154872 | 32 | 25 | 7219 | 90158 | 97376  | 3.6  | G11 | 0.6468 | 0.6113 | - | USA          |
| Mycobacterium phage Audrick   | 155205 | 33 | 26 | 6544 | 91423 | 97966  | 4.13 | G11 | 0.6466 | 0.614  | - | USA          |
| Mycobacterium phage Ava3      | 154466 | 33 | 26 | 6394 | 91216 | 97609  | 4.22 | G11 | 0.6476 | 0.6146 | - | USA          |
| Mycobacterium phage BeanWater | 154061 | 33 | 26 | 6259 | 91070 | 97328  | 4.31 | G11 | 0.6472 | 0.6177 | - | USA          |
| Mycobacterium phage Bigswole  | 156514 | 34 | 27 | 6475 | 93826 | 100300 | 4.32 | G11 | 0.6478 | 0.6161 | - | USA          |
| Mycobacterium phage Breeniome | 154434 | 33 | 26 | 6605 | 90723 | 97327  | 4.09 | G11 | 0.6478 | 0.6162 | - | USA          |
| Mycobacterium phage Cali      | 155372 | 34 | 27 | 6865 | 92217 | 99081  | 4.08 | G11 | 0.6472 | 0.6105 | - | -            |
| Mycobacterium phage Daffodil  | 155034 | 33 | 26 | 6394 | 91784 | 98177  | 4.22 | G11 | 0.6474 | 0.6146 | - | USA          |
| Mycobacterium phage Dandelion | 157568 | 33 | 26 | 7371 | 94760 | 102130 | 3.66 | G11 | 0.6473 | 0.6127 | - | USA          |
| Mycobacterium phage Drazdys   | 156281 | 33 | 26 | 7226 | 91126 | 98351  | 3.74 | G11 | 0.6468 | 0.6125 | - | USA          |
| Mycobacterium phage DTDevon   | 156754 | 33 | 26 | 6604 | 93205 | 99808  | 4.09 | G11 | 0.6464 | 0.6154 | - | USA          |
| Mycobacterium phage Erdmann   | 155565 | 33 | 26 | 6262 | 92444 | 98705  | 4.31 | G11 | 0.6475 | 0.6177 | - | USA          |
| Mycobacterium phage ErnieJ    | 153243 | 31 | 25 | 6539 | 90472 | 97010  | 3.98 | G11 | 0.6473 | 0.6146 | - | USA          |
| Mycobacterium phage ET08      | 155445 | 33 | 26 | 7108 | 90457 | 97564  | 3.8  | G11 | 0.646  | 0.6076 | - | USA          |
| Mycobacterium phage Gabriel   | 154474 | 33 | 26 | 6604 | 90698 | 97301  | 4.09 | G11 | 0.6479 | 0.6155 | - | USA          |
| Mycobacterium phage Ghost     | 155167 | 33 | 26 | 6544 | 91444 | 97987  | 4.13 | G11 | 0.6465 | 0.614  | - | USA          |
| Mycobacterium phage Gizmo     | 157482 | 33 | 26 | 6827 | 93378 | 100204 | 3.95 | G11 | 0.6464 | 0.6104 | - | USA          |
| Mycobacterium phage HyRo      | 153714 | 33 | 26 | 6638 | 90954 | 97591  | 4.07 | G11 | 0.6469 | 0.6125 | - | South Africa |
| Mycobacterium phage Koguma    | 155759 | 32 | 25 | 6683 | 89638 | 96320  | 3.89 | G11 | 0.6471 | 0.6104 | - | USA          |
| Mycobacterium phage LinStu    | 153882 | 32 | 25 | 6703 | 91636 | 98338  | 3.88 | G11 | 0.6484 | 0.6158 | - | USA          |
| Mycobacterium phage Littleton | 155800 | 34 | 27 | 6807 | 91780 | 98586  | 4.11 | G11 | 0.6472 | 0.6154 | - | USA          |
| Mycobacterium phage LRRHood   | 154349 | 33 | 26 | 6259 | 91484 | 97742  | 4.31 | G11 | 0.6473 | 0.6175 | - | USA          |
| Mycobacterium phage Lukilu    | 157034 | 33 | 26 | 6259 | 92494 | 98752  | 4.31 | G11 | 0.6466 | 0.6177 | - | USA          |
| Mycobacterium phage Momo      | 154553 | 33 | 26 | 6544 | 90741 | 97284  | 4.13 | G11 | 0.6474 | 0.614  | - | USA          |
| Mycobacterium phage MoMoMixon | 154573 | 33 | 26 | 6451 | 91238 | 97688  | 4.19 | G11 | 0.6477 | 0.6151 | - | USA          |
| Mycobacterium phage Myrna     | 164602 | 36 | 28 | 4661 | 91832 | 96492  | 6.22 | G11 | 0.6544 | 0.5936 | - | South Africa |
| Mycobacterium phage Nappy     | 156646 | 35 | 27 | 6638 | 92634 | 99271  | 4.22 | G11 | 0.6465 | 0.6109 | - | -            |
| Mycobacterium phage Phabba    | 164254 | 33 | 25 | 4666 | 90881 | 95546  | 5.57 | G11 | 0.6521 | 0.5866 | - | USA          |
| Mycobacterium phage Phox      | 154874 | 35 | 27 | 6431 | 92518 | 98948  | 4.35 | G11 | 0.6473 | 0.6173 | - | USA          |
| Mycobacterium phage Pio       | 156758 | 34 | 26 | 6667 | 94729 | 101395 | 4.05 | G11 | 0.6476 | 0.6162 | - | USA          |
| Mycobacterium phage Pleione   | 155586 | 34 | 26 | 6742 | 91912 | 98653  | 4    | G11 | 0.6473 | 0.6133 | - | USA          |
| Mycobacterium phage Rizal     | 153894 | 35 | 27 | 6797 | 89818 | 96614  | 4.12 | G11 | 0.6474 | 0.6129 | - | -            |
| Mycobacterium phage ScottMcG  | 154017 | 32 | 25 | 6246 | 90789 | 97034  | 4.16 | G11 | 0.6483 | 0.6177 | - | -            |
| Mycobacterium phage Sebata    | 155286 | 33 | 25 | 6619 | 92897 | 99515  | 3.93 | G11 | 0.6478 | 0.6166 | - | South Africa |
| Mycobacterium phage Shrimp    | 155714 | 34 | 26 | 6605 | 92444 | 99048  | 4.09 | G11 | 0.6472 | 0.6157 | - | USA          |
| Mycobacterium phage Spud      | 154906 | 32 | 25 | 6246 | 91905 | 98150  | 4.16 | G11 | 0.6478 | 0.6175 | - | -            |
| Mycobacterium phage Tonenili  | 160985 | 33 | 26 | 6711 | 95715 | 102425 | 4.02 | G11 | 0.6409 | 0.6173 | - | USA          |
| Mycobacterium phage Wally     | 155299 | 34 | 27 | 7330 | 90313 | 97642  | 3.82 | G11 | 0.6467 | 0.6095 | - | USA          |
| Mycobacterium phage Willis    | 155476 | 34 | 26 | 6394 | 91680 | 98073  | 4.22 | G11 | 0.6472 | 0.6148 | - | USA          |
| Mycobacterium phage Yucca     | 155582 | 34 | 26 | 7313 | 91508 | 98820  | 3.69 | G11 | 0.6471 | 0.6095 | - | USA          |
| Mycobacterium phage Zeenon    | 155292 | 34 | 26 | 6879 | 91594 | 98472  | 3.92 | G11 | 0.6474 | 0.6156 | - | USA          |
| Mycobacterium phage ZygoTaiga | 157204 | 34 | 26 | 6394 | 92700 | 99093  | 4.22 | G11 | 0.6469 | 0.615  | - | USA          |

|                                     |        |    |    |       |        |        |      |     |         |         |     |               |
|-------------------------------------|--------|----|----|-------|--------|--------|------|-----|---------|---------|-----|---------------|
| Cellulophaga phage phi17:2_18       | 145343 | 23 | 22 | 3390  | 87649  | 91038  | 6.49 | G12 | 0.3265  | 0.4109  | -   | -             |
| Cellulophaga phage phi17:2          | 145343 | 23 | 22 | 3390  | 87649  | 91038  | 6.49 | G12 | 0.3265  | 0.4109  | -   | Denmark       |
| Cellulophaga phage phi4:1_13        | 145865 | 23 | 22 | 3603  | 87196  | 90798  | 6.38 | G12 | 0.3267  | 0.4105  | -   | -             |
| Cellulophaga phage phi4:1_18        | 145865 | 23 | 22 | 3603  | 87196  | 90798  | 6.38 | G12 | 0.3267  | 0.4105  | -   | -             |
| Cellulophaga phage phi4:1           | 145865 | 23 | 22 | 3603  | 87196  | 90798  | 6.38 | G12 | 0.3267  | 0.4105  | -   | Denmark       |
| Cellulophaga phage phi38:1          | 72534  | 20 | 18 | 3272  | 35522  | 38793  | 5.50 | G12 | 0.38055 | 0.41779 | -   | Denmark       |
| Cellulophaga phage phi40:1          | 72529  | 20 | 18 | 3270  | 35520  | 38789  | 5.50 | G12 | 0.38055 | 0.41804 | -   | Denmark       |
| Aeromonas phage 65.2                | 236567 | 18 | 18 | 7372  | 107939 | 115310 | 2.44 | G13 | 0.37154 | 0.38158 | -   | -             |
| Aeromonas virus 65                  | 235229 | 18 | 18 | 7375  | 107957 | 115331 | 2.44 | G13 | 0.37196 | 0.38197 | -   | -             |
| Enterobacter phage PG7              | 146647 | 19 | 19 | 5345  | 72104  | 77448  | 3.55 | G14 | 0.37473 | 0.41230 | -   | China         |
| Klebsiella phage JD18               | 166313 | 16 | 16 | 4678  | 57172  | 61849  | 3.42 | G14 | 0.39599 | 0.42219 | -   | -             |
| Klebsiella phage KPV15              | 167034 | 16 | 16 | 4712  | 77431  | 82142  | 3.39 | G14 | 0.39522 | 0.41914 | -   | -             |
| Klebsiella phage PKO111             | 168758 | 16 | 16 | 4942  | 85     | 5026   | 3.23 | G14 | 0.39394 | 0.41845 | -   | -             |
| Klebsiella phage vB KpnM KpV477     | 168272 | 16 | 16 | 5401  | 67989  | 73389  | 2.96 | G14 | 0.39321 | 0.40326 | -   | Russia        |
| Vibrio phage pVp-1                  | 111506 | 22 | 22 | 7610  | 37974  | 45583  | 2.89 | G15 | 0.3971  | 0.4336  | -   | South Korea   |
| Vibrio phage vB VorS-PVo5           | 80578  | 15 | 15 | 2033  | 244    | 2276   | 7.37 | G15 | 0.40708 | 0.46850 | -   | Chile         |
| Pseudomonas phage C11               | 94109  | 15 | 15 | 2846  | 22320  | 25165  | 5.27 | G16 | 0.49391 | 0.49438 | -   | China         |
| Pseudomonas phage JG004             | 93017  | 15 | 15 | 2626  | 22657  | 25282  | 5.71 | G16 | 0.49261 | 0.50190 | -   | Germany       |
| Pseudomonas phage PaP1              | 91715  | 15 | 15 | 2519  | 20964  | 23482  | 5.95 | G16 | 0.49362 | 0.49980 | -   | China         |
| Pseudomonas phage vB PaeM C2-10 Ab1 | 92777  | 15 | 15 | 2568  | 21995  | 24562  | 5.84 | G16 | 0.49278 | 0.49494 | -   | Cote d'Ivoire |
| Pseudomonas phage Zigelbrucke       | 92338  | 15 | 15 | 2670  | 21733  | 24402  | 5.61 | G16 | 0.49318 | 0.50112 | -   | Switzerland   |
| Cronobacter phage CR3               | 149273 | 19 | 19 | 4005  | 144372 | 148376 | 4.74 | G17 | 0.50948 | 0.50637 | -   | -             |
| Cronobacter phage CR8               | 149162 | 18 | 18 | 4013  | 144252 | 148264 | 4.48 | G17 | 0.50832 | 0.50511 | -   | -             |
| Cronobacter phage CR9               | 151924 | 19 | 19 | 2892  | 148134 | 151025 | 6.56 | G17 | 0.50556 | 0.51176 | -   | -             |
| Bacillus phage vB BanS-Tsamsa       | 168876 | 21 | 21 | 2039  | 148615 | 150653 | 10.3 | G18 | 0.3432  | 0.4458  | Tyr | -             |
| Bacillus phage PBC2                 | 168689 | 19 | 19 | 2937  | 148845 | 151781 | 6.46 | G18 | 0.34419 | 0.41539 | Tyr | -             |
| Enterobacteria phage ECGD1          | 148612 | 16 | 16 | 2879  | 61400  | 64278  | 5.55 | G19 | 0.37434 | 0.40685 | -   | -             |
| Enterobacteria phage phi92          | 173276 | 15 | 15 | 2920  | 51625  | 54544  | 5.13 | G19 | 0.39822 | 0.41721 | -   | -             |
| Escherichia phage vB EcoM PHB05     | 147659 | 16 | 16 | 2882  | 51277  | 54158  | 5.55 | G19 | 0.37536 | 0.41534 | -   | China         |
| Caulobacter phage Ccr10             | 219348 | 29 | 25 | 4229  | 47810  | 52038  | 5.91 | G2  | 0.6612  | 0.6113  | Tyr | -             |
| Caulobacter phage Ccr29             | 229319 | 29 | 25 | 4229  | 52818  | 57046  | 5.91 | G2  | 0.6616  | 0.6113  | Tyr | -             |
| Caulobacter phage Ccr2              | 220299 | 29 | 25 | 4229  | 48285  | 52513  | 5.91 | G2  | 0.6613  | 0.6113  | Tyr | -             |
| Caulobacter phage Ccr32             | 215799 | 29 | 24 | 4801  | 47830  | 52630  | 5    | G2  | 0.6616  | 0.6055  | Tyr | -             |
| Caulobacter phage Ccr34             | 216240 | 29 | 24 | 4801  | 48270  | 53070  | 5    | G2  | 0.6615  | 0.6055  | Tyr | -             |
| Caulobacter phage Ccr5              | 218729 | 28 | 24 | 4230  | 47682  | 51911  | 5.67 | G2  | 0.6623  | 0.6113  | Tyr | -             |
| Caulobacter phage CcrColossus       | 279967 | 28 | 24 | 10098 | 59240  | 69337  | 2.38 | G2  | 0.6217  | 0.6011  | Tyr | USA           |
| Caulobacter phage CcrKarma          | 221828 | 29 | 25 | 4826  | 47887  | 52712  | 5.18 | G2  | 0.6621  | 0.6055  | Tyr | USA           |
| Caulobacter phage CcrMagneto        | 218929 | 28 | 24 | 4228  | 47077  | 51304  | 5.68 | G2  | 0.6615  | 0.6119  | Tyr | USA           |
| Caulobacter phage CcrRogue          | 223720 | 28 | 24 | 4452  | 48466  | 52917  | 5.39 | G2  | 0.661   | 0.6123  | Tyr | USA           |
| Caulobacter phage CcrSwift          | 219216 | 28 | 24 | 4824  | 47039  | 51862  | 4.98 | G2  | 0.6607  | 0.6066  | Tyr | -             |
| Caulobacter phage phiCbK            | 205504 | 29 | 24 | 4801  | 155227 | 160027 | 5    | G2  | 0.661   | 0.6055  | Tyr | -             |
| Listeria phage List-36              | 131952 | 17 | 17 | 5659  | 97557  | 103215 | 3    | G20 | 0.36013 | 0.37692 | -   | -             |
| Listeria phage LP-048               | 133048 | 17 | 17 | 5632  | 27810  | 33441  | 3.01 | G20 | 0.35966 | 0.37820 | -   | USA           |
| Listeria phage LP-064               | 135279 | 17 | 17 | 5670  | 35285  | 40954  | 2.99 | G20 | 0.35926 | 0.37725 | -   | -             |
| Listeria phage LP-083-2             | 135831 | 17 | 17 | 5670  | 31951  | 37620  | 2.99 | G20 | 0.35868 | 0.37725 | -   | USA           |
| Listeria phage LP-124               | 135764 | 17 | 17 | 5670  | 129836 | 135505 | 2.99 | G20 | 0.35874 | 0.37725 | -   | USA           |

|                                    |        |    |    |       |        |        |      |     |         |         |     |                |
|------------------------------------|--------|----|----|-------|--------|--------|------|-----|---------|---------|-----|----------------|
| Listeria phage LP-125              | 135281 | 17 | 17 | 5670  | 35284  | 40953  | 2.99 | G20 | 0.35930 | 0.37725 | -   | -              |
| Listeria phage vB LmoM AG20        | 133057 | 17 | 17 | 5017  | 25833  | 30849  | 3.38 | G20 | 0.35933 | 0.38011 | -   | Canada         |
| Listeria phage WIL-1               | 134369 | 17 | 17 | 5670  | 550    | 6219   | 2.99 | G20 | 0.35991 | 0.37954 | -   | Spain          |
| Listeria virus A511                | 137619 | 17 | 17 | 5662  | 25835  | 31496  | 3    | G20 | 0.35929 | 0.37884 | -   | -              |
| Listeria virus P100                | 131384 | 17 | 17 | 5661  | 123712 | 129372 | 3    | G20 | 0.36044 | 0.37979 | -   | -              |
| Aeromonas phage 31.2               | 172957 | 17 | 17 | 5321  | 65027  | 70347  | 3.19 | G21 | 0.43916 | 0.44785 | -   | -              |
| Aeromonas phage 44RR2.8t.2         | 173590 | 17 | 17 | 5211  | 65379  | 70589  | 3.26 | G21 | 0.43880 | 0.43965 | -   | -              |
| Aeromonas phage AS-gz              | 162422 | 15 | 15 | 4560  | 140918 | 145477 | 3.28 | G21 | 0.41129 | 0.44462 | -   | -              |
| Aeromonas phage L9-6               | 173578 | 17 | 17 | 4290  | 66651  | 70940  | 3.96 | G21 | 0.43864 | 0.45664 | -   | -              |
| Aeromonas phage phiAS4             | 163875 | 16 | 16 | 4607  | 102155 | 106761 | 3.47 | G21 | 0.41297 | 0.44389 | -   | South Korea    |
| Aeromonas phage Riv-10             | 174311 | 17 | 17 | 5211  | 66489  | 71699  | 3.26 | G21 | 0.43831 | 0.43984 | -   | -              |
| Aeromonas phage SW69-9             | 173097 | 17 | 17 | 4332  | 66154  | 70485  | 3.92 | G21 | 0.43893 | 0.45406 | -   | -              |
| Aeromonas virus 31                 | 172963 | 16 | 16 | 5323  | 65028  | 70350  | 3    | G21 | 0.43913 | 0.44787 | -   | -              |
| Aeromonas virus 44RR2              | 173591 | 17 | 17 | 5211  | 65379  | 70589  | 3.26 | G21 | 0.43881 | 0.43965 | -   | -              |
| Stenotrophomonas phage IME13       | 162327 | 16 | 16 | 4903  | 64250  | 69152  | 3.26 | G21 | 0.41179 | 0.43178 | -   | China          |
| Acinetobacter phage AM24           | 97139  | 18 | 18 | 4572  | 23966  | 28537  | 3.93 | G22 | 0.37254 | 0.39676 | -   | -              |
| Acinetobacter phage YMC13/03/R2096 | 98170  | 17 | 17 | 3808  | 16051  | 19858  | 4.46 | G22 | 0.37036 | 0.42017 | -   | South Korea    |
| Serratia phage CBH8                | 171175 | 16 | 16 | 3872  | 70949  | 74820  | 4.13 | G23 | 0.38736 | 0.43182 | -   | United Kingdom |
| Serratia phage CHI14               | 171175 | 16 | 16 | 3872  | 70949  | 74820  | 4.13 | G23 | 0.38735 | 0.43182 | -   | United Kingdom |
| Serratia phage X20                 | 172450 | 17 | 17 | 4491  | 70617  | 75107  | 3.78 | G23 | 0.38655 | 0.41327 | -   | United Kingdom |
| Cronobacter phage vB CsaM GAP31    | 147940 | 25 | 25 | 6320  | 84261  | 90580  | 3.96 | G3  | 0.463   | 0.4729  | -   | Canada         |
| Enterobacteria phage 4MG           | 148567 | 25 | 25 | 6615  | 60264  | 66878  | 3.78 | G3  | 0.4633  | 0.4706  | -   | -              |
| Klebsiella phage vB KpnM BIS47     | 147443 | 24 | 24 | 7761  | 42726  | 50486  | 3.09 | G3  | 0.4462  | 0.4597  | -   | Poland         |
| Klebsiella phage vB KpnM KB57      | 142987 | 25 | 25 | 6721  | 60892  | 67612  | 3.72 | G3  | 0.4462  | 0.4638  | -   | Russia         |
| Salmonella phage PVP-SE1           | 145964 | 25 | 25 | 7147  | 62894  | 70040  | 3.5  | G3  | 0.4561  | 0.4598  | -   | -              |
| Salmonella phage SSE-121           | 147745 | 24 | 22 | 4414  | 28     | 4441   | 4.98 | G3  | 0.4529  | 0.4613  | -   | -              |
| Salmonella phage 19                | 94766  | 16 | 16 | 3205  | 91411  | 94615  | 4.99 | G3  | 0.45642 | 0.47582 | -   | India          |
| Salmonella phage 41                | 91721  | 19 | 19 | 6671  | 85026  | 91696  | 2.84 | G3  | 0.45594 | 0.46005 | -   | India          |
| Streptomyces phage Jay2Jay         | 133531 | 43 | 27 | 13685 | 86672  | 100356 | 2.05 | G4  | 0.495   | 0.4889  | -   | USA            |
| Streptomyces phage Mildred21       | 131976 | 40 | 23 | 11824 | 84530  | 96353  | 2.03 | G4  | 0.4947  | 0.4851  | -   | USA            |
| Streptomyces phage NootNoot        | 131086 | 43 | 26 | 12239 | 83499  | 95737  | 2.21 | G4  | 0.5025  | 0.4987  | -   | USA            |
| Streptomyces phage Paradiddles     | 133486 | 43 | 26 | 12754 | 85797  | 98550  | 2.12 | G4  | 0.5012  | 0.4947  | -   | USA            |
| Streptomyces phage Peebs           | 133047 | 43 | 27 | 13783 | 85888  | 99670  | 2.03 | G4  | 0.5006  | 0.4966  | -   | USA            |
| Streptomyces phage Samisti12       | 133710 | 43 | 27 | 13815 | 87270  | 101084 | 2.03 | G4  | 0.4992  | 0.4971  | -   | USA            |
| Streptomyces phage Sushi23         | 133917 | 43 | 26 | 12350 | 86244  | 98593  | 2.19 | G4  | 0.4998  | 0.4942  | -   | USA            |
| Streptomyces phage Warpy           | 132996 | 42 | 26 | 13462 | 86336  | 99797  | 2.01 | G4  | 0.4956  | 0.4875  | -   | USA            |
| Aeromonas phage phiAS5             | 225268 | 25 | 24 | 10076 | 189405 | 199480 | 2.38 | G5  | 0.43    | 0.4335  | -   | South Korea    |
| Aeromonas phage PX29               | 222006 | 23 | 22 | 7897  | 93173  | 101069 | 2.79 | G5  | 0.4204  | 0.4392  | -   | -              |
| Bacteriophage Aeh1                 | 233234 | 23 | 23 | 9203  | 105608 | 114810 | 2.5  | G5  | 0.4278  | 0.4359  | -   | -              |
| Mycobacterium phage GardenSalsa    | 80309  | 21 | 21 | 5033  | 57182  | 62214  | 4.17 | G6  | 0.6092  | 0.5724  | Ser | USA            |
| Mycobacterium phage GenevaB15      | 80123  | 21 | 21 | 5204  | 56831  | 62034  | 4.23 | G6  | 0.6079  | 0.5694  | Ser | USA            |
| Mycobacterium phage MrMago         | 84303  | 21 | 21 | 5034  | 57182  | 62215  | 4.17 | G6  | 0.608   | 0.5723  | Ser | USA            |
| Mycobacterium phage Rey            | 83724  | 21 | 21 | 5168  | 57088  | 62255  | 4.26 | G6  | 0.6087  | 0.5739  | Ser | USA            |
| Mycobacterium phage Bongo          | 80228  | 20 | 19 | 5492  | 54782  | 60273  | 3.45 | G6  | 0.61621 | 0.58430 | Ser | USA            |
| Mycobacterium phage Bricole        | 81128  | 20 | 19 | 5876  | 54546  | 60421  | 3.23 | G6  | 0.61627 | 0.58696 | Ser | USA            |
| Mycobacterium phage PegLeg         | 80955  | 19 | 18 | 6908  | 54522  | 61429  | 2.60 | G6  | 0.61549 | 0.58512 | Ser | USA            |

|                                       |        |    |    |       |        |        |      |           |         |         |     |                |
|---------------------------------------|--------|----|----|-------|--------|--------|------|-----------|---------|---------|-----|----------------|
| Bacteriophage KVP40                   | 244834 | 28 | 28 | 7449  | 173137 | 180585 | 3.76 | G7        | 0.426   | 0.4299  | -   | -              |
| Vibrio phage nt-1                     | 247511 | 28 | 28 | 11081 | 89870  | 100950 | 2.53 | G7        | 0.4133  | 0.4027  | -   | -              |
| Vibrio phage phi-Grn1                 | 248605 | 28 | 28 | 7862  | 37085  | 44946  | 3.56 | G7        | 0.4126  | 0.4144  | -   | Greece         |
| Vibriophage phi-pp2                   | 246421 | 28 | 28 | 7920  | 174369 | 182288 | 3.54 | G7        | 0.4255  | 0.4245  | -   | -              |
| Vibrio phage phi-ST2                  | 250485 | 26 | 26 | 6888  | 98264  | 105151 | 3.77 | G7        | 0.4123  | 0.421   | -   | Greece         |
| Vibrio phage ValKK3                   | 248088 | 26 | 26 | 7821  | 196346 | 204166 | 3.32 | G7        | 0.4123  | 0.4167  | -   | Malaysia       |
| Vibrio phage VH7D                     | 246964 | 27 | 27 | 6750  | 110760 | 117509 | 4    | G7        | 0.4131  | 0.4212  | -   | China          |
| Salmonella phage SP01                 | 117842 | 22 | 22 | 9428  | 80907  | 90334  | 2.33 | G8        | 0.3898  | 0.4035  | -   | China          |
| Bacteriophage T5                      | 121750 | 23 | 21 | 9221  | 28038  | 37258  | 2.28 | G8        | 0.3927  | 0.3885  | -   | -              |
| Enterobacteria phage EPS7             | 111382 | 29 | 29 | 12998 | 29711  | 42708  | 2.23 | G8        | 0.399   | 0.3978  | -   | -              |
| Enterobacteria phage SPC35            | 118351 | 22 | 21 | 7625  | 27768  | 35392  | 2.75 | G8        | 0.3939  | 0.4035  | -   | -              |
| Escherichia phage bV EcoS AKFV33      | 108853 | 23 | 23 | 10034 | 27840  | 37873  | 2.29 | G8        | 0.3895  | 0.4015  | -   | -              |
| Escherichia phage OSYSP               | 110901 | 27 | 22 | 9148  | 899    | 10046  | 2.4  | G8        | 0.3916  | 0.3956  | -   | -              |
| Escherichia phage phiLLS              | 107263 | 21 | 20 | 8212  | 47745  | 55956  | 2.44 | G8        | 0.3899  | 0.3933  | -   | Mexico         |
| Escherichia phage slur09              | 111751 | 21 | 20 | 9218  | 96753  | 105970 | 2.17 | G8        | 0.3902  | 0.3944  | -   | -              |
| Escherichia phage vB EcoS FFH1        | 108483 | 22 | 21 | 7719  | 27984  | 35702  | 2.72 | G8        | 0.3924  | 0.4021  | -   | -              |
| Salmonella phage 100268 sal2          | 125114 | 29 | 28 | 9511  | 29621  | 39131  | 2.94 | G8        | 0.4022  | 0.4008  | -   | Italy          |
| Salmonella phage 118970 sal2          | 114180 | 29 | 28 | 9513  | 28730  | 38242  | 2.94 | G8        | 0.4028  | 0.4006  | -   | Italy          |
| Salmonella phage Stitch               | 123475 | 29 | 28 | 9040  | 28496  | 37535  | 3.1  | G8        | 0.4031  | 0.4067  | -   | -              |
| Yersinia phage phiR201                | 122696 | 26 | 25 | 12019 | 28563  | 40581  | 2.08 | G8        | 0.4051  | 0.4084  | -   | -              |
| Mycobacteriophage Wildcat             | 78296  | 23 | 23 | 4440  | 58812  | 63251  | 5.41 | G9        | 0.5685  | 0.5545  | -   | -              |
| Mycobacterium phage Cosmo             | 78229  | 23 | 23 | 4905  | 58394  | 63298  | 4.89 | G9        | 0.5684  | 0.549   | -   | South Africa   |
| Acinetobacter phage vB AbaM Acibel004 | 99730  | 21 | 21 | 3686  | 59973  | 63658  | 5.7  | Singleton | 0.3727  | 0.4045  | -   | -              |
| Cronobacter phage S13                 | 182145 | 25 | 24 | 9685  | 118148 | 127832 | 2.48 | Singleton | 0.402   | 0.41    | -   | -              |
| Enterococcus phage EFDG1              | 147589 | 23 | 23 | 9118  | 44887  | 54004  | 2.63 | Singleton | 0.372   | 0.4001  | -   | Israel         |
| Halovirus HGTV-1                      | 143855 | 36 | 35 | 11155 | 42266  | 53420  | 3.14 | Singleton | 0.5036  | 0.4887  | -   | -              |
| Klebsiella phage vB Kpn IME260        | 123490 | 24 | 24 | 9183  | 30293  | 39475  | 2.61 | Singleton | 0.4537  | 0.4571  | -   | China          |
| Pectobacterium phage My1              | 122024 | 27 | 25 | 12308 | 28674  | 40981  | 2.03 | Singleton | 0.4061  | 0.4014  | -   | -              |
| Providencia phage vB PreS PR1         | 118537 | 25 | 23 | 9979  | 28385  | 38363  | 2.3  | Singleton | 0.3952  | 0.3952  | -   | Portugal       |
| Pseudomonas phage phiPsa374           | 97906  | 20 | 20 | 3719  | 24977  | 28695  | 5.38 | Singleton | 0.4773  | 0.4784  | -   | New Zealand    |
| Stenotrophomonas phage IME-SM1        | 159514 | 22 | 19 | 3696  | 1537   | 5232   | 5.14 | Singleton | 0.5414  | 0.534   | -   | China          |
| Stenotrophomonas phage vB SmaS-DLP 6  | 168489 | 38 | 37 | 10524 | 103314 | 113837 | 3.51 | Singleton | 0.5575  | 0.5348  | -   | Canada         |
| Streptomyces phage BRock              | 112523 | 29 | 29 | 11763 | 95476  | 107238 | 2.55 | Singleton | 0.5232  | 0.5258  | -   | USA            |
| Synechococcus phage S-CRM01           | 178563 | 36 | 20 | 9214  | 127547 | 136760 | 2.17 | Singleton | 0.3975  | 0.4371  | -   | USA            |
| Acinetobacter phage Acj9              | 169947 | 19 | 19 | 4108  | 78801  | 82908  | 4.62 | Singleton | 0.40028 | 0.41334 | -   | -              |
| Acinetobacter virus 133               | 159801 | 16 | 16 | 3952  | 65864  | 69815  | 4.04 | Singleton | 0.39672 | 0.41827 | -   | -              |
| Agrobacterium phage Atu ph07          | 490380 | 30 | 17 | 6615  | 332329 | 338943 | 2.56 | Singleton | 0.37060 | 0.39365 | -   | USA            |
| Cafeteria roenbergensis virus BV-PW1  | 617453 | 16 | 16 | 2795  | 509015 | 511809 | 5.72 | Singleton | 0.23343 | 0.35707 | -   | USA            |
| Gordonia phage GMA2                   | 103424 | 17 | 17 | 2463  | 57692  | 60154  | 6.90 | Singleton | 0.53372 | 0.52659 | -   | Australia      |
| Lactobacillus phage LpeD              | 145162 | 15 | 15 | 3368  | 136332 | 139699 | 4.45 | Singleton | 0.34112 | 0.38658 | -   | China          |
| Pseudoalteromonas phage J2-1          | 142204 | 16 | 16 | 3154  | 132398 | 135551 | 5.07 | Singleton | 0.37920 | 0.40679 | -   | China          |
| Pseudomonas phage VCM                 | 98765  | 17 | 17 | 3871  | 69564  | 73434  | 4.39 | Singleton | 0.48508 | 0.48385 | -   | -              |
| Ralstonia phage RSP15                 | 167619 | 20 | 16 | 7958  | 87081  | 95038  | 2.01 | Singleton | 0.44702 | 0.45062 | -   | -              |
| Sulfatobacter phage phiCB2047-B       | 74485  | 16 | 15 | 1651  | 68618  | 70268  | 9.08 | Singleton | 0.42983 | 0.48577 | -   | -              |
| Synechococcus phage S-PM2             | 196280 | 26 | 16 | 4829  | 118243 | 123071 | 3.31 | Singleton | 0.37820 | 0.40919 | -   | United Kingdom |
| Roseobacter phage DSS3P8              | 146135 | 31 | 25 | 9638  | 11149  | 20786  | 2.59 | Singleton | 0.5635  | 0.5651  | Tyr | USA            |

|                            |        |    |    |      |       |       |      |           |        |        |     |         |
|----------------------------|--------|----|----|------|-------|-------|------|-----------|--------|--------|-----|---------|
| Sphingobium phage Lacusarx | 130138 | 24 | 24 | 4190 | 66918 | 71107 | 5.72 | Singleton | 0.6017 | 0.5887 | Tyr | Denmark |
|----------------------------|--------|----|----|------|-------|-------|------|-----------|--------|--------|-----|---------|

BEGIN and END columns correspond to the genomic coordenates of the cluster. Tyr: tyrosine recombinase; Ser: serine recombinase.
