# Supplementary material for: Global In-Silico Scenario of tRNA Genes and Their Organization in Virus Genomes
Source: MDPI journal article supplement (doi:10.3390/v11020180), 2019-02-21
Supplement: s1 [file s1]

**Table S1** Number of genomes and corresponding viral families identified in the data set

|     |                            |
|-----|----------------------------|
| 1   | <i>Alvernaviridae</i>      |
| 1   | <i>Asfarviridae</i>        |
| 1   | <i>Barnaviridae</i>        |
| 1   | <i>Carmotetraviridae</i>   |
| 1   | <i>Corticoviridae</i>      |
| 1   | <i>Gammaflexiviridae</i>   |
| 1   | <i>Guttaviridae</i>        |
| 1   | <i>Malacoherpesviridae</i> |
| 1   | <i>Marnaviridae</i>        |
| 1   | <i>Mymonaviridae</i>       |
| 1   | <i>Nimaviridae</i>         |
| 1   | <i>Permutotetraviridae</i> |
| 1   | <i>Plasmaviridae</i>       |
| 1   | <i>Quadriviridae</i>       |
| 1   | <i>Roniviridae</i>         |
| 1   | <i>Sunviridae</i>          |
| 2   | <i>Bidnaviridae</i>        |
| 2   | <i>Globuloviridae</i>      |
| 2   | <i>Hytrosaviridae</i>      |
| 2   | <i>Lavidaviridae</i>       |
| 2   | <i>Picobirnaviridae</i>    |
| 2   | <i>Turriviridae</i>        |
| 3   | <i>Ampullaviridae</i>      |
| 3   | <i>Benyviridae</i>         |
| 3   | <i>Megabirnaviridae</i>    |
| 3   | <i>Ophioviridae</i>        |
| 4   | <i>Alphatetraviridae</i>   |
| 4   | <i>Amalgaviridae</i>       |
| 4   | <i>Hepeviridae</i>         |
| 4   | <i>Nyamiviridae</i>        |
| 5   | <i>Cystoviridae</i>        |
| 6   | <i>Ascoviridae</i>         |
| 6   | <i>Bicaudaviridae</i>      |
| 6   | <i>Mesoniviridae</i>       |
| 6   | <i>Mimiviridae</i>         |
| 6   | <i>Nudiviridae</i>         |
| 6   | <i>Sphaerolipoviridae</i>  |
| 7   | <i>Alloherpesviridae</i>   |
| 7   | <i>Marseilleviridae</i>    |
| 7   | <i>Pneumoviridae</i>       |
| 8   | <i>Birnaviridae</i>        |
| 8   | <i>Chrysoviridae</i>       |
| 8   | <i>Filoviridae</i>         |
| 8   | <i>Nanoviridae</i>         |
| 8   | <i>Polydnaviridae</i>      |
| 9   | <i>Lipothrixviridae</i>    |
| 10  | <i>Rudiviridae</i>         |
| 11  | <i>Fuselloviridae</i>      |
| 11  | <i>Tectiviridae</i>        |
| 14  | <i>Arteriviridae</i>       |
| 14  | <i>Hypoviridae</i>         |
| 14  | <i>Orthomyxoviridae</i>    |
| 15  | <i>Bornaviridae</i>        |
| 15  | <i>Nodaviridae</i>         |
| 18  | <i>Hepadnaviridae</i>      |
| 21  | <i>Iridoviridae</i>        |
| 22  | <i>Leviviridae</i>         |
| 24  | <i>Dicistroviridae</i>     |
| 24  | <i>Phycodnaviridae</i>     |
| 25  | <i>Togaviridae</i>         |
| 29  | <i>Endornaviridae</i>      |
| 31  | <i>Iflaviridae</i>         |
| 34  | <i>Caliciviridae</i>       |
| 36  | <i>Bromoviridae</i>        |
| 38  | <i>Arenaviridae</i>        |
| 38  | <i>Narnaviridae</i>        |
| 39  | <i>Closteroviridae</i>     |
| 41  | <i>Tymoviridae</i>         |
| 47  | <i>Inoviridae</i>          |
| 47  | <i>Luteoviridae</i>        |
| 48  | <i>Astroviridae</i>        |
| 48  | <i>Poxviridae</i>          |
| 50  | <i>Secoviridae</i>         |
| 52  | <i>Partitiviridae</i>      |
| 55  | <i>Alphaflexiviridae</i>   |
| 55  | <i>Coronaviridae</i>       |
| 55  | <i>Genomoviridae</i>       |
| 57  | <i>Paramyxoviridae</i>     |
| 65  | <i>Totiviridae</i>         |
| 67  | <i>Retroviridae</i>        |
| 69  | <i>Tombusviridae</i>       |
| 69  | <i>Virgaviridae</i>        |
| 70  | <i>Caulimoviridae</i>      |
| 77  | <i>Anelloviridae</i>       |
| 78  | <i>Herpesviridae</i>       |
| 84  | <i>Baculoviridae</i>       |
| 89  | <i>Betaflexiviridae</i>    |
| 97  | <i>Adenoviridae</i>        |
| 97  | <i>Polyomaviridae</i>      |
| 100 | <i>Parvoviridae</i>        |
| 121 | <i>Bunyaviridae</i>        |
| 121 | <i>Flaviviridae</i>        |

123 *Rhabdoviridae*  
125 *Picornaviridae*  
145 *Potyviridae*  
148 *Papillomaviridae*  
180 *Circoviridae*  
437 *Geminiviridae*  
563 *Microviridae*  
584 *Podoviridae*  
1079 *Myoviridae*  
1981 *Siphoviridae*  
2475 *Reoviridae*
